# Supplementary material for: Identification of Stem Cells from Large Cell Populations with Topological Scoring
Source: bioRxiv preprint, doi:10.1101/2020.04.08.032102, version 1 (2020-04-09)
Supplement: Supplemental Table 1 [file 032102_file02.xlsx]

## Sheet: Nilsson_rare
Supplemental Table 1. Nilsson rare data
CD10	CD110	CD11b	CD123	CD19	CD3	CD34	CD38	CD4	CD45	CD45RA	CD49fpur	CD90bio	label
0.555575	0.152409	0.686307	0.661655	0.682983	0.903357	2.00596	2.56904	1.42506	1.71418	1.3169	1.78797	1.21882	0
3.20506	1.92339	1.45485	0.741287	3.60747	3.02179	3.27932	4.80569	2.10421	4.10418	4.0163	2.90226	2.5541	0
5.26377	1.50539	1.15074	1.64	3.12658	2.33295	3.1705	4.48877	2.34804	1.87698	2.71143	1.83206	3.99738	0
2.4785	1.3292	3.10804	1.01649	2.45812	1.98783	2.95283	4.06139	3.71906	2.67467	1.40986	2.77525	2.93738	0
4.93155	1.99239	0.632121	1.26342	3.56043	2.16524	3.57973	4.28798	2.61308	2.18431	2.93796	2.33645	3.77107	0
5.35095	1.59069	0.743098	1.60803	3.02627	2.4315	3.24066	3.98392	2.77043	1.76627	2.25368	2.329	3.97913	0
0.769662	0.736308	1.48625	1.23552	0.295865	1.14436	1.01683	2.65107	1.02351	2.08104	0.650371	1.38927	1.53971	0
1.61812	1.56375	2.75652	0.940174	2.11684	1.65316	2.77312	3.89948	3.90864	2.58701	1.42254	2.51397	2.42082	0
5.18649	1.07356	0.668433	1.50158	2.80482	2.21655	3.19582	4.48609	2.43823	2.19559	2.95017	2.1548	3.79024	0
4.7811	1.7775	0.730168	1.5411	3.40682	1.99995	3.60775	4.92924	2.86462	2.33295	2.83332	2.50503	3.60614	0
1.92957	0.146805	1.672	2.08767	0.885563	1.63841	2.69316	4.32554	2.31177	2.77171	2.74597	2.38306	2.13564	0
5.02715	1.85471	0.954824	1.57925	3.43298	2.41656	3.75325	4.95112	2.92857	2.24899	2.75722	2.6155	3.79498	0
4.13043	1.95059	0.905722	0.777675	3.51889	1.64896	3.46334	4.57542	2.52283	2.22021	2.93504	2.17113	2.8968	0
2.27524	1.58178	4.35215	1.41562	2.50277	2.18431	3.22098	2.77241	4.20669	2.97846	2.0482	3.65078	3.88664	0
1.86945	1.93948	1.29737	1.76091	3.47815	2.3891	2.93017	2.41756	1.83723	3.22503	3.82487	2.11479	1.74196	0
4.06394	2.64868	0.894138	1.07254	4.26798	1.79962	4.03269	4.11089	3.14153	2.15103	1.98301	2.35535	3.02258	0
5.19512	1.9863	0.830707	1.7215	3.83684	2.29184	3.65366	4.52784	2.76071	2.39219	3.02526	2.06629	3.86763	0
2.2481	1.50299	4.26262	1.09809	2.89003	1.95375	3.30788	3.66996	4.37609	2.35557	2.27078	3.51438	3.8176	0
0.64006	1.16386	1.78797	0.728968	1.65758	1.24491	1.96627	3.94347	3.42708	1.95375	0.627529	1.90544	1.41495	0
4.76937	1.92501	0.913391	1.29604	3.67614	2.05709	3.60622	5.05903	2.7821	2.24899	2.86336	2.27191	3.32591	0
3.07549	1.70225	1.20063	0.239957	1.30406	4.23821	1.7122	4.07957	1.65581	4.783	1.51679	3.34402	3.36295	0
3.07695	3.1776	1.08202	1.66722	4.86704	3.48855	4.40793	2.28615	3.31713	4.57729	4.64909	3.38041	2.92205	0
5.15484	1.69824	1.13472	1.53678	3.44446	2.2941	3.26343	4.99643	2.4286	2.26308	3.64329	1.94804	3.7337	0
4.53451	1.74343	0.802063	1.76443	3.35345	2.08936	3.49545	4.89777	2.83915	2.06702	3.51207	2.39213	3.25088	0
4.6415	2.31316	0.947384	1.85346	3.93802	2.0935	3.69756	4.96427	2.93386	1.95217	2.78958	2.08407	3.31593	0
1.87736	0.252314	1.05825	0.33099	-0.0210651	0.766914	0.0339935	0.714081	0.0165992	1.39722	0.36791	0.668433	0.846829	0
1.12931	0.118721	1.20672	0.961423	0.453073	1.90869	2.54015	3.63322	2.22572	2.53748	0.681856	2.05937	2.49873	0
2.67412	2.36828	1.0022	0.564647	3.99717	3.23755	3.5667	0.745113	2.75652	4.29696	5.20441	3.02419	2.68171	0
2.0376	1.38927	2.90529	0.896658	2.1452	2.94395	2.75605	3.51045	3.89049	4.04129	1.75875	3.09162	2.56432	0
4.95543	1.8871	0.89801	1.61812	3.59541	2.25841	3.79128	4.63963	3.1242	2.00296	3.13579	2.5761	3.81273	0
3.77528	1.89045	0.48437	0.6444	3.306	1.84427	3.57117	4.40337	2.56262	2.34594	3.11836	2.40112	2.84429	0
0.682983	0.564533	1.89084	0.999524	0.325995	1.07703	0.714081	2.40343	1.42506	2.24306	0.866732	1.39445	1.33338	0
4.67614	1.2419	0.557243	1.23552	2.66978	2.18557	2.78434	4.85659	1.99342	2.52132	3.49477	1.89084	3.52616	0
4.26754	1.89878	0.469494	0.947294	3.55322	1.94901	3.56574	4.31651	2.94263	2.41354	3.33264	2.43823	3.13146	0
4.40869	2.22989	0.469494	1.18946	3.89825	1.69221	3.49097	4.56686	2.52018	2.16653	2.5761	1.83379	2.84749	0
3.06721	1.97556	1.28606	0.280699	1.58133	4.18117	1.78493	2.56124	3.19815	4.17701	1.4573	2.97301	3.2611	0
4.69316	2.18179	1.52371	1.71418	3.77673	2.07965	3.72743	5.10434	2.85132	2.126	2.86587	2.43246	3.31713	0
4.88512	2.30647	0.632121	1.83559	3.90908	2.14188	3.83382	4.12326	2.82486	1.95689	2.51397	2.32579	3.50379	0
2.19967	1.31226	4.12464	1.06607	2.61149	1.88373	3.20458	4.38008	4.26231	2.5742	2.12917	3.32273	3.53619	0
3.40507	1.51732	0.760175	1.10125	3.05984	1.36508	2.92351	3.7026	2.22572	1.67389	1.74384	1.96339	2.3322	0
2.25686	0.784136	3.05587	0.87438	1.05304	3.10017	1.41815	3.12184	2.84172	4.0682	2.10686	2.81434	3.09012	0
1.71968	2.16909	1.16025	0.50959	3.68938	1.27467	3.45264	6.47021	2.15985	2.35237	1.79336	1.6036	1.51214	0
5.22814	2.66451	1.5306	1.81574	4.25012	2.71506	4.06081	4.7829	3.34636	2.82935	3.48803	2.77525	3.93363	0
4.88297	2.16909	1.21278	1.42044	3.73212	2.40546	3.62057	5.17332	2.84429	2.57249	3.50046	2.41003	3.66787	0
3.94762	1.6841	0.781262	1.04317	3.28456	1.49334	3.06386	4.16318	2.14078	2.02524	2.33962	1.9356	2.74455	0
3.98668	1.03125	0.9769	1.27166	2.70334	1.55232	3.2464	4.90182	2.45535	1.72009	2.86273	2.23746	2.78414	0
1.34333	0.392201	0.890255	1.09493	0.881845	2.18305	2.66451	1.56602	2.44588	3.17618	1.34154	2.47588	2.63068	0
2.23481	1.71615	1.12501	1.12313	3.37528	3.09044	2.91558	1.95059	2.09486	4.18117	4.00608	2.55068	2.43053	0
5.5175	1.91034	1.80228	2.08122	3.72377	2.64948	3.90543	4.25234	3.23055	2.38704	3.55501	2.78822	4.20008	0
2.59207	2.52674	1.91824	2.44732	4.17788	3.18745	3.73557	3.02893	2.89007	4.21321	4.44996	2.95936	2.25483	0
2.56746	0.444243	1.38927	1.56668	1.16875	1.89712	3.05697	4.18859	2.14718	2.83334	3.2253	2.39913	2.36054	0
4.66061	2.02524	1.16969	1.37631	3.6208	2.19184	3.41017	4.76548	2.67945	2.08936	3.29074	1.83723	3.2611	0
4.84143	1.48116	0.388549	1.18946	3.14757	2.12333	2.84981	4.82279	2.14718	1.99087	1.74946	1.83551	3.48023	0
4.35781	1.78308	0.854823	1.22417	3.39489	2.02964	3.30457	4.69116	2.64564	2.30423	2.62112	2.08407	3.09062	0
4.46816	3.20136	1.55324	1.46522	4.86842	2.51406	4.57845	4.94743	3.66702	3.0728	3.67854	2.75652	3.43709	0
4.70171	2.77241	0.793777	1.76443	4.42029	2.21288	4.18618	4.30739	3.26025	2.34486	2.76835	2.19209	3.5349	0
4.92062	1.77564	0.580963	1.41078	3.40507	2.31316	3.38018	4.42382	2.63622	2.09212	2.38407	2.26398	3.61392	0
4.60235	1.20195	1.34694	2.04165	2.63054	1.79597	3.29957	4.89565	2.49329	1.69019	2.48965	2.3657	3.30382	0
4.08896	1.23584	0.743098	0.682983	2.71798	1.81231	3.09404	4.67997	2.49329	2.22869	3.25728	2.15354	2.87712	0
4.54598	2.35557	1.00934	1.64393	4.08116	1.86161	3.84672	3.92374	3.0003	2.14712	2.80237	2.39913	3.31874	0
1.37631	0.279673	2.03406	0.532711	0.761607	1.05258	1.62774	1.73958	1.9465	1.50059	0.214159	1.39445	1.62269	0
2.49071	1.63415	1.51214	0.224574	1.64	3.72497	1.84602	1.12121	3.30342	4.24131	0.654904	2.94321	2.96165	0
4.72701	2.36089	1.02351	1.63011	4.02087	2.21899	3.9496	4.85057	3.01881	2.44427	2.88145	2.5761	3.50112	0
2.85801	2.03111	0.725834	1.20983	3.50285	3.02838	3.08477	3.43929	2.21741	4.13891	4.43617	2.81566	2.68847	0
4.71141	1.71813	0.854823	1.09175	3.42239	2.15622	3.24991	4.42707	2.36364	2.03694	2.20784	1.78797	3.35411	0
4.53157	2.14712	1.06509	1.83231	3.82864	2.0528	3.58603	5.03867	2.83073	2.30982	3.04962	2.46005	3.24487	0
1.00973	0.549869	2.39614	0.518869	1.58548	0.883493	2.20551	3.43856	2.88392	1.64264	0.834754	1.7606	1.68199	0
0.907666	0.402694	1.22781	1.20983	0.978877	1.75491	2.64469	3.64571	2.19939	2.78154	0.57151	2.29645	1.69779	0
4.91616	2.26541	1.00934	1.53895	3.69332	2.25489	3.80272	4.63831	3.12031	2.28957	2.92443	2.61952	3.64877	0
2.83732	1.40249	0.822579	0.183305	1.12622	3.99337	1.45638	1.38394	2.47957	4.64312	0.690745	3.19362	3.13339	0
5.02133	2.33404	1.42506	1.99348	4.03009	2.2323	3.79256	4.8017	2.74171	2.2907	3.41553	1.95113	3.66022	0
5.03328	2.00296	0.64127	1.38378	3.69096	2.2689	3.57593	4.43677	2.74526	2.07545	2.49056	2.00227	3.61064	0
1.35867	0.75387	2.45157	0.892969	1.81908	1.11786	3.04412	3.19072	3.32908	1.82486	0.59973	2.95247	2.44683	0
4.98302	2.31316	0.874616	1.65952	3.99775	2.24544	3.85635	4.95975	2.797	2.27468	3.02365	2.13435	3.66872	0
3.97863	2.23829	0.677393	0.863108	3.8162	1.66977	3.78359	4.68081	2.91848	2.15881	2.70186	2.34594	2.79093	0
3.06378	0.664098	1.3169	2.38483	1.42284	1.87867	2.65028	3.82719	2.09754	2.71207	2.7026	2.14973	2.55922	0
5.10473	2.35344	1.16969	1.56668	3.904	2.67156	4.06471	4.80207	3.2891	2.84785	3.61868	2.91371	3.91174	0
1.56035	0.972585	1.68992	1.93703	1.82737	2.00745	4.00272	3.6245	3.36678	2.90512	3.0003	3.3545	2.71726	0
2.73037	0.564533	1.54198	2.4688	1.34333	2.04706	3.00401	3.81901	2.37391	2.90326	3.42959	2.55068	2.63464	0
5.23225	1.80508	0.663935	1.54326	3.49968	2.50766	3.52456	4.81566	2.64798	2.43938	3.33067	2.54724	3.8704	0
4.47873	1.4336	0.393685	0.836458	2.74463	2.02818	3.22952	3.97247	2.45911	2.31316	2.93738	2.31934	3.26364	0
4.43874	1.99087	0.781262	0.964932	3.66999	1.95059	3.56638	4.04606	2.76904	2.06419	3.01394	2.44397	3.20085	0
0.64873	0.749498	1.44253	1.04317	0.54646	1.12454	0.766914	2.60466	1.43757	2.01342	0.866732	1.29455	0.760175	0
1.38874	0.859283	1.94804	0.678739	1.27712	1.70025	1.72402	4.30556	2.99699	2.47314	0.609043	2.04679	1.69779	0
1.56458	0.687003	2.12266	0.467335	1.41562	0.822186	1.62345	3.41614	2.66881	1.96003	1.09541	1.68	1.4573	0
5.53731	1.4336	0.882457	1.83723	3.21567	2.59713	3.5832	4.61659	2.7353	2.22385	3.19453	2.50951	4.20686	0
4.72524	1.36779	0.777068	1.14767	2.83855	2.22627	2.94692	4.40017	2.43343	1.98018	2.82289	1.85934	3.4417	0
4.59897	2.32749	0.826649	1.3813	3.97922	2.05423	3.8898	4.54892	3.08961	2.33947	3.26744	2.52811	3.37626	0
5.00614	1.66564	0.87068	1.56879	3.25943	2.27237	3.28949	4.78157	2.49692	1.94267	2.37493	2.03264	3.62665	0
1.30672	0.922941	1.8941	0.467335	1.86786	1.27173	2.72324	5.99585	3.31513	2.20304	1.32242	2.26625	1.86605	0
5.15484	2.42356	0.806189	1.64393	3.9374	2.39527	3.72087	4.78233	2.78754	2.28729	2.83073	2.35639	3.70528	0
2.80228	2.67855	1.8076	0.95084	4.30917	3.38747	3.77505	1.83549	2.86084	4.38532	5.31266	3.07849	2.6749	0
4.96363	1.64264	1.29737	2.1305	3.19864	1.92985	3.46121	4.78858	2.56347	1.98325	2.45911	2.37288	3.61898	0
4.372	2.64709	1.33065	1.79551	4.27767	2.74087	3.89719	4.78735	2.97751	3.51484	3.68606	2.48233	3.15387	0
4.60256	1.15415	0.580963	1.31993	2.53977	1.94107	2.34379	4.42436	1.90544	2.41956	3.54485	1.51447	3.38379	0
4.53936	2.54811	0.654904	1.1044	4.15402	2.07545	3.80726	4.08435	2.97976	2.2689	2.98424	2.13564	3.28662	0
1.68247	0.360476	1.13472	0.462591	0.773674	2.08936	2.81659	2.6801	2.35743	2.98477	0.987803	2.48508	3.0449	1
3.96074	2.28957	0.995021	1.38874	3.86945	1.52441	3.89442	5.09938	2.85831	2.33622	3.50212	2.51664	2.88885	0
2.73514	0.355153	1.31413	1.66145	1.40348	2.02082	3.18183	4.45327	2.76974	2.95283	3.06261	2.79969	2.44015	0
4.88901	1.40249	0.878542	1.45827	3.14123	2.05851	3.14305	4.49055	2.36673	2.10581	3.05847	1.94804	3.56695	0
4.87753	3.15518	1.23376	1.4926	4.80579	2.2689	4.49004	5.09654	3.47921	2.63179	2.43246	2.71143	3.63661	0
4.90654	1.7415	1.04793	1.56668	3.45715	2.29636	3.69108	4.5028	2.8974	2.30982	3.06981	2.55837	3.52061	0
3.69672	1.83196	0.39881	1.00293	3.47164	1.70624	3.62299	4.49638	2.46099	2.1601	2.9077	2.10819	2.79093	0
2.47762	1.31226	2.0496	0.141725	1.11067	3.6383	1.31793	2.32859	3.01827	3.96261	4.31824	2.74029	3.13001	0
4.11043	2.66843	1.43258	1.14463	4.17026	2.14057	3.99629	4.5698	3.30585	2.48259	3.18452	2.53685	3.13387	0
2.73922	1.47131	1.48625	0.335977	1.06283	3.91089	1.56147	1.22669	1.72298	4.46089	3.04174	3.14772	2.95132	0
4.94289	1.78122	1.29173	1.81574	3.40122	2.08798	3.5522	4.84247	2.98814	2.12467	2.44015	2.412	3.64097	0
4.8032	0.953706	1.10865	2.0144	2.53231	2.21411	2.88576	4.32734	2.12657	2.21899	3.67714	1.94184	3.55375	0
0.674484	0.640885	1.65785	0.87438	0.564647	1.14436	1.05961	1.81412	0.984178	2.10036	0.552464	1.45974	1.25438	0
4.60256	1.56602	0.755923	1.05631	3.28653	2.05994	3.58947	4.51887	2.57191	1.99391	2.9645	2.48141	3.42852	0
1.22417	0.631513	2.14335	0.578178	0.47207	1.51256	1.19254	1.93948	1.46945	2.30647	0.57151	1.74196	1.5191	0
4.97038	2.05566	0.604392	1.44893	3.37456	2.11393	3.57973	4.19219	2.60661	1.99391	3.06364	2.23161	3.69791	0
4.78039	2.10581	0.743098	1.38626	3.69332	2.16396	3.79664	4.56757	2.94379	2.59797	3.54357	2.57945	3.51963	0
4.81352	2.27699	1.11849	1.76091	4.00507	2.126	3.72169	4.53346	2.815	2.34271	3.16372	2.29976	3.57813	0
2.06162	0.449388	1.72106	0.315982	0.295865	3.34887	1.29217	1.16063	2.08813	4.4249	4.3656	3.07237	2.76558	0
3.47848	2.37248	0.474464	1.01311	3.99252	1.6615	3.96712	4.56285	3.14487	2.51588	3.38304	2.65883	2.52195	0
2.77452	2.81118	1.56439	2.3595	4.60256	3.13963	4.05159	2.27814	3.00632	4.18773	4.64516	2.96678	2.46847	0
4.28422	1.20195	0.814407	1.16276	2.76333	1.96003	3.5522	4.33331	2.94959	2.30087	3.19589	2.58941	3.38116	0
3.48107	2.41254	1.47908	1.10754	4.15749	2.24306	3.77297	5.22859	2.64798	3.12333	3.31312	2.25368	2.54206	0
5.3817	1.78862	0.846829	1.76443	3.56043	2.59377	3.81553	4.54544	3.10854	2.31759	3.04121	2.75582	4.0165	0
1.11067	0.101824	0.965908	0.896658	0.793577	1.61481	2.98648	4.08626	2.44873	2.49659	1.96491	2.45157	1.98897	0
0.699854	0.926825	2.00666	1.14158	0.495595	1.51256	0.976328	2.47976	1.08202	2.41153	1.00934	1.56217	1.2889	0
4.72262	1.63628	1.05825	1.40104	3.35272	2.04418	3.72443	5.26117	2.96791	2.28729	2.41495	2.68171	3.60464	0
4.79809	2.10581	0.764416	1.20114	3.68384	2.07965	3.67571	4.33122	2.93913	2.25017	2.8242	2.43053	3.40457	0
0.785647	1.34866	2.12004	1.26892	0.457837	1.48849	0.899407	3.16335	1.8005	2.26774	0.9769	1.73061	1.70366	0
1.68247	0.668704	2.32793	0.280699	1.34075	0.855207	1.38661	3.07018	2.93328	1.35416	1.14755	1.34424	0.909562	0
5.17554	1.7775	1.0022	2.06162	3.25416	2.41656	3.32472	4.87154	2.88577	2.15493	2.94263	2.11611	3.86809	0
4.9643	3.60714	1.86438	1.75031	5.19861	2.91313	4.90182	5.32633	4.00325	3.44328	4.12964	3.07595	3.81954	0
5.28512	1.95532	1.31413	1.75563	3.72122	2.61708	3.72142	4.48226	2.72668	2.32968	2.69296	2.41593	3.9113	0
5.48434	1.45387	1.02351	1.98641	2.95116	2.61543	2.91864	4.50918	1.8627	2.16139	2.89923	1.9356	4.09726	0
2.16089	0.788412	2.53685	1.1747	1.4926	3.14889	2.18934	3.67111	2.88762	4.16177	1.18216	3.03007	2.82224	0
4.79147	1.00956	0.734489	1.24955	2.77452	2.07265	3.31161	4.79778	2.56347	1.66977	2.51752	2.36157	3.5124	0
3.70711	2.18683	1.59285	1.95911	3.7501	3.70595	3.32105	5.25242	2.41985	4.75977	5.33633	3.3572	3.13771	0
1.98499	0.32302	1.29455	0.146937	0.609379	3.27974	1.26286	4.07381	1.29455	4.23756	3.48769	2.86462	2.83268	0
3.0232	1.63628	1.80228	0.0999004	0.929423	4.19681	1.11115	0.867399	1.31413	4.69334	5.18997	3.27582	3.45191	0
3.80032	2.30535	3.24745	2.80672	3.90506	3.29118	3.70148	5.14888	3.58857	4.22703	4.31942	3.38679	3.41988	0
4.65612	1.91198	0.886362	1.58548	3.44815	1.96471	3.41539	4.38136	2.45441	1.84427	2.35326	1.88429	3.45226	0
3.6359	2.56731	1.91824	2.52228	4.01633	3.0495	4.39515	4.36131	3.80734	4.09233	4.79597	4.02996	3.51042	0
2.71173	1.59069	1.3683	0.16255	1.1507	3.84406	1.20195	2.47882	2.49511	3.96862	3.94419	2.57861	3.01286	0
5.34433	1.91198	1.44005	2.29539	3.4933	2.36617	3.50774	4.48558	2.53598	2.19434	3.0215	2.43823	4.11872	0
4.88719	2.00596	0.969582	1.29336	3.5983	2.126	3.68599	4.40198	2.97131	2.12333	2.99091	2.44397	3.6243	0
4.73943	2.01639	1.05138	1.17173	3.58641	1.93468	3.61905	4.09968	2.78482	2.25017	3.16045	2.63858	3.43317	0
5.5884	1.7122	1.08202	2.0928	3.42445	2.68087	3.60221	4.31847	2.89252	2.02377	2.41887	2.59927	4.24913	0
0.0736667	0.49518	1.61	0.699854	0.250182	1.39193	0.520217	1.36236	1.17594	2.36089	0.469494	1.48148	1.28606	0
2.31515	0.485084	1.81113	0.724841	0.809313	3.45013	1.95846	3.13963	1.90221	4.46455	4.24072	3.12663	2.85957	0
0.933016	0.740717	1.33882	1.23834	0.851746	1.6213	3.04466	4.68709	2.59271	2.39322	1.92459	2.49782	2.00812	0
4.87865	1.96938	0.894138	1.23552	3.57969	2.21655	3.50332	4.66887	2.88022	2.0935	3.05795	2.31068	3.61482	0
5.18	1.93307	1.09873	1.91144	3.50412	2.37248	3.52756	5.14947	2.80237	2.33404	3.15151	2.3096	3.89972	0
4.33337	2.33838	-0.0994361	1.38874	3.72046	1.82307	3.69221	4.54904	3.5081	2.04562	2.87587	2.12917	2.99147	0
4.46936	1.42074	0.326185	1.05957	2.94012	1.87017	3.39472	4.23313	2.62909	2.24068	2.73958	2.33962	3.36525	0
1.19239	0.762578	2.26625	0.541888	1.72878	1.25989	1.99239	3.4999	3.20265	2.13925	0.874616	2.00812	1.7606	0
5.19751	1.22669	1.23079	1.916	2.72968	2.34055	2.98305	4.3444	2.27978	2.03403	3.10854	2.11216	3.92864	0
1.26892	0.593533	1.266	0.355843	1.74675	1.14436	1.6841	3.74792	2.57778	2.05423	0.508942	1.551	1.53744	0
1.27712	0.705104	2.86147	0.50959	1.56879	1.12787	1.82129	3.37128	3.1482	1.80689	1.11194	2.12135	2.33856	0
5.06177	1.96782	1.21278	1.91296	3.73589	2.26774	3.52021	4.93169	2.71143	1.83901	2.49147	2.0369	3.71986	0
3.96354	1.76627	0.672919	0.85933	3.25254	1.74919	3.21236	4.87397	2.10021	2.37352	3.598	2.02692	2.6802	0
3.54839	1.85644	0.772862	0.954377	3.52572	1.47871	3.69924	4.58136	2.83268	2.15103	3.16745	2.43535	2.43823	0
4.25446	2.19184	0.89801	1.22986	3.7296	2.03111	3.65073	4.78091	2.79363	2.43446	3.54835	2.39614	3.01557	0
1.64393	0.163603	1.0129	0.172937	0.172937	2.80914	1.26286	3.50638	1.31135	3.99629	3.99249	2.63701	2.18474	0
5.14261	1.47131	0.980544	1.41803	2.88476	2.41052	3.10778	4.77776	2.28537	2.35023	3.47648	2.39913	3.81809	0
4.81659	2.0149	1.46461	2.28907	3.57616	2.1445	3.58603	4.52956	2.89375	2.11528	3.08961	2.24445	3.54485	0
4.27489	2.49566	0.409032	1.00293	4.09757	1.94584	3.86849	4.73709	2.75442	2.37666	2.43053	2.22454	3.2031	0
4.66409	2.16139	0.708384	1.27166	3.85506	2.11663	3.55964	4.56816	2.68322	2.39322	2.92205	2.22572	3.35024	0
3.9804	0.381666	1.10205	0.929423	0.728968	1.93628	2.20304	4.94984	1.80936	2.48447	3.11002	1.94184	2.72596	0
3.09281	2.27006	1.14116	0.785647	3.71714	2.82198	3.40115	4.79385	2.38609	3.91316	3.75799	2.59435	2.25483	0
4.48255	2.06419	0.995021	1.17767	3.81527	1.93307	3.35758	5.05006	2.41593	2.01639	2.47773	1.73061	3.27457	0
1.30672	1.19254	2.0538	0.409769	1.79891	1.64264	2.01193	4.29727	3.74527	2.62283	0.991417	2.1872	1.68398	0
4.35226	2.05709	0.489307	1.7215	3.55382	1.89212	3.57973	4.61446	2.69296	2.01787	2.43919	2.42666	3.1482	0
4.2877	1.45889	0.552464	0.918588	3.03943	2.11797	3.45836	4.34513	2.91848	2.32749	3.18635	2.52283	3.24659	0
1.06607	0.682446	1.48625	0.528107	0.198821	1.35416	1.04905	2.19059	1.21882	2.14581	0.686307	1.50045	1.38667	0
3.98921	2.09762	1.0129	1.16875	3.77262	1.44378	3.71922	4.27135	2.71726	2.08936	2.74809	2.13821	2.7502	0
4.70933	2.40445	0.654904	1.56879	4.0222	2.01342	3.99462	4.75929	3.19045	2.15103	2.65883	2.37493	3.5193	0
3.59281	1.91198	0.969582	0.674484	3.62977	1.50299	3.96777	4.42734	3.26912	2.24544	2.1872	2.69072	2.78278	0
0.947294	0.386939	1.05825	0.604953	0.618198	1.72206	2.67623	4.52809	2.00373	2.69393	1.10865	2.35431	1.59285	0
2.11308	1.96782	0.890255	0.523493	3.43772	2.78434	2.99557	1.76249	2.0008	3.87133	4.37205	2.55581	2.08813	0
1.13239	0.569396	0.627529	-0.0157993	0.881845	0.540033	1.9054	3.46263	1.3683	1.07703	0.126926	1.27176	1.41241	0
5.19447	2.16909	0.826649	1.65564	3.7414	2.37666	3.71619	4.71205	2.86462	2.65979	3.55469	2.37288	3.94333	0
4.49238	1.96159	0.874616	1.19239	3.5658	2.04994	3.58414	4.62651	2.74384	2.36512	3.40236	2.31394	3.23752	0
4.89004	2.17673	0.403926	1.42284	3.83047	2.25958	3.58665	4.76876	2.65031	2.2689	2.40707	2.10288	3.52746	0
4.7375	2.08104	0.743098	1.23834	3.59483	2.29184	3.57752	4.67438	2.80237	2.28501	3.66504	2.44683	3.4346	0
0.631347	0.942251	1.8199	1.15976	0.325995	1.44884	0.883493	2.36089	1.37094	2.37978	0.738799	1.66394	1.42757	0
0.781666	1.10778	2.72452	1.1747	0.578178	1.22975	1.57054	4.03189	2.33962	2.09625	1.42506	1.68199	1.59069	0
4.51153	2.27122	1.18835	1.83559	3.98843	2.04706	3.98981	4.53698	3.25302	2.43249	3.03007	2.70186	3.40052	0
4.65782	2.2371	0.57151	1.20983	3.95531	2.02377	3.85611	4.56321	3.05483	2.4085	2.93679	2.66345	3.34207	0
3.62221	2.37666	1.02351	1.30406	3.94701	1.70425	3.71261	4.92472	2.93621	2.31093	2.90408	2.39414	2.57945	0
1.80399	0.135584	1.23969	0.219435	0.541888	3.10221	1.57954	4.762	1.50981	4.15005	5.0817	2.75582	2.03974	0
5.13644	1.9021	0.909562	1.75563	3.58408	2.17419	3.59041	4.82252	2.91311	2.2359	2.84813	2.54982	3.95611	0
1.08538	0.65948	2.29314	0.245073	1.58548	1.2328	1.55919	3.62631	2.89313	2.44036	1.03403	1.81289	1.74946	0
3.09947	1.85644	1.30857	0.0946586	1.46753	4.02077	1.6213	2.22748	2.99147	4.13656	4.7079	2.88331	3.30949	0
2.40389	2.42754	1.58199	0.355843	4.02821	2.71655	3.65337	1.9863	2.8057	3.7823	5.00073	2.61228	2.3096	0
1.98783	0.490138	1.71722	0.443516	0.817119	3.19397	1.92177	4.54892	1.59501	4.35041	5.18142	3.03007	2.54982	0
4.69547	1.70425	0.998616	1.38378	3.36297	1.82129	3.28823	4.51664	2.39614	2.04994	2.18965	2.11216	3.41043	0
5.7622	2.30982	1.18835	2.1305	4.03196	2.90944	3.69193	4.83331	2.5481	2.37248	2.89801	2.01829	4.28375	0
4.76955	1.88036	0.890255	1.3459	3.41169	2.01193	3.55706	4.3815	2.88084	2.42853	3.41988	2.36776	3.59406	0
0.870632	0.365788	2.27191	0.188482	1.17173	0.801166	1.3732	3.15759	2.56347	1.30655	1.05482	1.50748	1.27464	0
4.33309	1.89878	0.781262	1.11692	3.52386	1.72402	3.60375	4.40683	2.63227	2.24187	2.51397	2.30085	3.06002	0
2.52228	1.49092	1.2631	0.203982	1.54756	3.69644	1.38126	1.18623	2.9898	4.02158	1.45485	2.64172	2.86838	0
3.84498	3.06333	0.818499	1.39859	4.76426	2.41153	4.28953	5.03499	3.19634	3.23488	4.17641	2.45062	2.45535	0
1.25234	0.32302	1.71529	1.00633	1.06607	2.1445	2.81862	3.44001	2.49147	3.02289	1.07189	2.69072	2.36157	0
5.38629	1.92663	1.36565	2.3771	3.6089	2.53391	3.6662	5.01781	3.01611	2.42654	3.27038	2.62512	4.05979	0
1.61812	0.485084	0.890255	0.0894141	0.355843	2.88007	1.18939	3.36894	1.36565	3.9291	4.15338	2.47032	2.26056	0
4.03475	2.03694	0.36791	0.87438	3.4775	1.76249	3.31696	4.09517	2.53946	2.31427	2.43343	1.93716	2.6749	0
3.96354	2.60882	1.47908	2.49589	4.36359	2.90821	3.97353	4.92299	2.93328	3.99441	4.13159	2.78414	2.87151	0
2.76729	2.57506	1.80583	2.50105	4.22333	3.26213	3.73178	2.58785	2.72524	4.32013	5.07322	2.93328	2.83592	0
3.11124	2.92835	1.18216	1.16276	4.6359	2.98648	4.21789	3.54012	3.40604	4.11497	4.05213	2.89252	2.5481	0
2.19736	1.97093	1.25145	0.528107	3.78657	2.67234	3.21418	1.55232	2.22572	3.82249	4.07269	2.49238	2.25138	0
1.29336	0.525188	0.951109	0.724841	1.01311	2.03984	3.01072	3.63949	2.46753	2.99782	0.846829	2.66345	2.40112	0
4.71642	1.51256	0.866732	1.37631	3.13759	2.14188	3.31531	4.57682	2.42375	2.2335	2.94147	2.03406	3.55184	0
4.53451	2.29862	0.913391	1.07577	3.86945	2.178	3.56989	4.23231	2.73172	2.50766	3.15151	2.06904	3.29198	0
5.39804	2.34594	1.29737	2.10805	4.05558	2.43544	3.90177	4.94767	3.08103	2.23949	2.69816	2.50053	4.08151	0
3.07014	1.97556	2.26511	0.126066	1.63011	4.06354	1.6256	2.51132	3.46202	4.06898	4.44426	2.8385	3.1208	0
1.07577	0.439088	1.39445	1.58341	1.18653	1.51018	2.66608	3.58446	2.36054	2.37978	1.19143	2.46753	1.59069	0
1.47442	0.355153	1.13472	1.03323	1.03987	1.93948	2.41354	2.74957	1.9356	2.83467	0.797925	2.33856	2.60661	0
4.94679	0.163603	1.93716	1.19823	0.345926	2.66451	-0.113092	2.15233	0.469494	3.2823	0.850831	1.8199	3.68661	0
1.27984	0.454521	1.81464	2.06689	1.27712	1.75871	3.02124	4.31105	2.73601	2.79681	3.08002	2.59271	1.96947	0
4.57808	2.01044	0.513824	1.59988	3.64501	1.91034	3.55899	4.45945	2.79969	2.07405	2.07726	2.19818	3.20444	0
2.87652	2.59629	1.31413	1.33039	4.24651	2.82935	3.79537	2.56818	2.65031	3.90771	4.42032	2.8037	2.62112	0
5.65184	2.13132	0.947384	1.92054	3.98433	2.85568	3.94127	4.7358	3.02794	2.2907	3.26406	2.45629	4.32631	0
4.69364	1.83372	0.91721	1.34075	3.50063	2.05851	3.31819	4.26261	2.34909	2.07965	3.05639	2.12396	3.39831	0
2.62751	2.65979	1.99194	0.757564	4.17691	3.16335	3.79892	1.32358	2.99534	4.28064	5.9525	3.04279	2.60091	0
4.93147	1.94743	0.984178	1.67868	3.64198	2.25606	3.78564	4.52158	2.85069	2.26774	3.41734	2.51664	3.6172	0
4.6416	2.53212	1.12501	1.39613	4.28582	1.99995	4.04665	4.62718	3.17348	2.34163	3.10804	2.47218	3.37324	0
1.5561	0.691546	2.11479	0.840295	1.04317	2.63745	1.51256	3.47041	2.41299	3.79638	0.969582	2.47681	2.64251	0
3.29046	3.11131	1.85089	2.30688	4.7506	3.28145	4.247	4.03048	3.13146	4.44425	4.76966	3.17024	2.83203	0
1.17767	0.274217	1.85428	0.961423	0.609379	2.10717	2.47029	2.26774	2.18351	2.91741	1.24559	2.47218	2.33113	0
1.36373	1.19254	1.7606	0.476795	1.75208	1.66357	2.38497	4.32839	3.55406	2.69621	0.528399	2.25598	1.63315	0
5.27789	1.56147	1.18526	1.68437	3.21271	2.35237	3.23354	4.58379	2.44683	2.06702	2.47403	2.1459	3.97124	0
3.93904	1.70823	0.383404	0.911316	3.33189	1.7122	3.47392	4.51973	2.45157	2.25606	3.06622	2.30633	2.84301	0
3.07452	3.22007	1.25438	1.1044	4.80061	3.24243	4.40931	2.54103	3.22574	4.28424	4.14851	3.02794	2.97526	0
2.73173	1.65525	1.17594	0.0684133	0.855543	3.84576	1.17029	0.949898	1.66394	4.08206	4.74572	2.52899	3.03539	0
4.68201	1.6213	0.604392	1.1747	3.31292	2.06561	3.26645	4.60872	2.53424	2.15103	2.76002	2.10021	3.40897	0
4.04605	2.16267	1.11849	1.56668	3.72046	2.06702	3.78255	5.10826	3.03804	2.46265	3.60253	2.61952	2.91251	0
4.64737	1.99542	1.10535	1.21845	3.48204	2.29523	3.29789	4.75324	2.34699	2.18683	2.53162	2.08678	3.46167	0
0.881845	0.883493	1.73819	1.05631	0.360788	1.41296	1.20195	2.20551	1.36034	2.59124	0.755923	1.60787	1.91506	0
1.36373	0.544957	1.52601	0.631347	1.02321	2.40038	2.78504	4.71245	2.48965	2.96223	2.07179	2.40608	2.05659	0
4.69566	1.7606	0.743098	1.39859	3.35161	1.99693	3.55155	4.16124	2.83656	2.10581	3.30463	2.32686	3.50379	0
5.50777	1.41035	0.984178	1.78353	2.97611	2.5699	2.95754	4.66129	1.96491	2.08104	2.93738	1.63731	4.1275	0
3.88838	2.7632	0.834754	1.12931	4.55874	1.81051	4.15166	4.41659	3.18315	2.59713	3.029	2.28537	2.39012	0
5.08355	1.00956	1.30298	1.67297	2.60377	1.94584	2.26425	4.4678	1.73251	1.96159	2.60904	1.47187	3.63923	0
4.69615	1.70425	0.921018	1.12622	3.38887	2.1601	3.49338	4.42028	2.70629	2.07965	2.90226	2.30742	3.41516	0
2.5002	0.938411	1.2631	0.270554	0.741287	3.67628	1.20195	1.14108	1.33338	4.52257	2.52371	3.047	2.77936	0
4.83039	1.95217	0.928603	1.56246	3.66056	2.0485	3.89925	4.58956	2.87089	2.22142	3.02204	2.61791	3.49039	0
3.7963	2.93858	1.4573	1.85668	4.49462	2.11393	4.03068	5.0344	2.95879	2.56124	3.87178	2.18843	2.51219	0
2.12058	1.85989	1.24852	1.48127	3.51357	2.92351	3.0858	2.71282	2.17734	3.92486	4.52548	2.73958	2.12657	0
3.93081	1.82129	1.07528	0.947294	3.37888	1.67183	3.24772	4.25877	2.29535	2.16524	2.85704	2.16488	2.81895	0
4.02728	2.37038	1.10535	0.769662	3.94273	1.81591	3.69165	4.0874	2.89007	2.53391	3.41516	2.35326	2.8968	0
3.96094	2.90388	1.47908	2.07081	4.59727	3.35639	4.16652	5.6314	3.39683	4.37738	4.71952	3.1208	3.17856	0
4.53315	1.56602	0.834754	1.29604	3.10041	2.05994	3.27505	4.0813	2.5861	2.25017	2.87276	2.22335	3.24314	0
2.6418	1.02045	0.659426	0.27563	0.863108	3.74712	1.34866	0.805394	1.47187	4.41973	0.87068	2.81895	3.13146	0
1.56668	0.805394	2.43053	0.457837	1.85507	1.50539	2.04562	3.89211	3.04909	2.36089	1.29455	2.07726	1.73251	0
4.02069	2.92411	0.980544	1.29336	4.57168	2.16653	4.49207	4.44572	3.44735	2.59208	3.09663	2.87338	2.78686	0
1.1507	0.413146	1.41495	0.626975	0.716554	2.02964	2.73723	3.01183	2.19331	2.98933	0.695173	2.41789	1.99786	0
2.52312	2.37978	1.37883	1.83395	3.99543	3.20136	3.60499	2.46169	2.70481	4.28205	3.66391	3.0881	2.57861	0
4.64697	2.0149	1.363	1.68437	3.71252	2.1445	3.72906	4.79731	2.84685	2.30871	3.10952	2.38103	3.43709	0
3.70063	2.54458	0.721489	1.61208	4.31002	1.91198	3.74712	4.84355	2.64798	2.834	3.19679	2.11216	2.57275	0
5.12879	0.903357	0.699588	1.43951	2.36049	2.36933	2.57335	4.71794	1.49574	2.21899	2.78005	1.70755	3.69241	0
3.4801	0.235809	1.71914	2.27631	1.27439	1.88205	2.82064	2.88197	2.38811	2.64308	2.83462	2.53511	2.59927	0
4.52474	2.44329	0.793777	1.07898	3.9731	2.15493	3.97502	4.30204	3.18177	2.84981	3.67882	2.60985	3.3022	0
2.35357	1.35141	3.84518	0.940174	2.48723	1.66771	2.86344	3.43492	3.96853	2.15751	1.7698	3.13531	3.43851	0
2.42074	0.976328	3.03327	0.914957	2.04968	1.86504	2.50582	3.46227	3.70201	2.58616	1.65377	2.69964	2.70849	0
4.93701	1.29794	0.947384	1.36373	3.14531	1.84602	3.21008	4.3382	2.24907	1.66771	2.56177	2.06491	3.45993	0
5.18278	2.08521	1.10205	1.46059	3.54535	2.35451	3.63681	4.78499	2.77799	2.19309	3.34402	2.35118	3.79024	0
4.50933	2.61708	0.672919	1.27439	4.19643	2.24662	3.90611	4.81087	2.89375	2.46552	3.48363	2.39813	3.23709	0
4.44023	1.76627	0.686307	1.26342	3.59483	1.97556	3.25909	3.95699	2.2876	2.03403	2.87089	1.78255	3.18223	0
2.94289	1.37589	1.05138	0.057901	1.19532	4.0684	1.82841	1.23584	1.8199	4.74756	1.96187	3.46652	3.49477	0
3.09329	0.355153	1.33065	0.978877	0.769662	1.73958	2.40445	5.16358	1.9006	2.57678	2.47311	2.13564	2.51219	0
5.52117	1.72009	1.54198	1.94739	3.37564	2.659	3.66504	4.21186	2.71581	2.17419	2.96393	2.6283	4.08169	0
4.33199	2.10309	0.818499	1.22986	3.58903	2.07965	3.47357	4.65946	2.73243	2.22748	3.05639	2.14207	3.26575	0
5.24088	1.99239	1.10205	1.90071	3.64364	2.54634	3.60221	4.96205	2.64564	2.27584	3.22793	2.16237	3.81809	0
1.42284	0.569396	1.23673	1.93554	1.08857	1.62774	2.90574	3.94829	2.5481	2.76675	3.08558	2.66114	2.22572	0
4.82288	1.95059	0.566766	1.15976	3.64501	2.55513	3.63949	4.63623	2.90044	2.37143	2.86021	2.55153	3.97665	0
5.32933	1.63415	1.08202	1.93852	3.22449	2.42256	3.15903	4.93659	2.25138	1.96938	2.82942	2.01829	3.94032	0
2.89701	2.24306	1.81113	2.10299	3.36078	3.34926	4.61872	2.01935	4.36967	4.47389	5.03774	4.6266	3.84376	0
5.55331	1.50539	0.439452	1.8124	3.28417	2.63098	3.638	5.00086	2.9645	2.178	3.15717	2.74809	4.16925	0
4.82727	2.31538	1.08538	1.44893	3.91854	2.18431	3.837	5.00041	3.0215	2.22142	2.97131	2.39414	3.57658	0
4.1328	2.63826	0.830707	1.5259	4.3547	2.07685	3.87416	4.71459	2.5113	3.05003	3.33067	2.10421	2.95305	0
2.72282	2.54546	2.02692	2.81493	4.21667	2.91741	3.90543	2.10853	2.54724	4.10287	4.21506	2.93679	2.29314	0
3.92729	2.14057	0.87068	0.840295	3.75873	1.71022	3.56253	4.47014	2.68997	2.24662	2.77456	2.051	2.82812	0
4.88576	2.40546	1.18216	1.53678	4.07706	2.13925	3.72251	4.94493	2.81763	2.00745	2.92443	2.03406	3.55785	0
5.18844	1.55002	0.969582	1.70865	3.33564	2.38497	3.35046	4.40835	2.57527	2.10581	2.58941	2.33539	3.93709	0
2.11056	1.07009	2.74526	0.687217	1.56458	2.69316	2.22748	3.13226	3.01014	3.67427	1.29737	2.84301	2.54724	0
4.60045	1.41815	0.378249	1.60803	2.95061	1.87528	3.27718	4.34234	2.30633	1.94426	2.83527	1.98749	3.25983	0
0.50959	0.474942	1.47668	0.940174	0.419458	1.19882	0.731887	1.87528	1.23969	2.41153	0.677393	1.47908	1.27464	0
2.27309	2.35023	1.05482	1.09809	3.97883	2.49937	3.46935	2.75605	2.6711	3.69644	3.80167	2.60254	1.98152	0
4.32337	2.85697	1.16025	1.95327	4.48647	2.52943	3.99148	4.98347	2.91071	3.44219	4.02996	2.53772	3.01827	0
2.79397	2.45495	1.22182	1.76443	4.09687	3.36504	3.61296	2.88197	2.75722	4.43072	4.65479	3.07951	2.66575	0
2.61533	2.42853	1.58852	1.89298	4.12823	3.21554	3.75617	2.76034	2.77043	4.45234	4.59334	3.13914	2.8621	0
1.90685	1.25392	4.00567	0.904007	2.37127	1.89379	3.09966	3.60159	4.14132	2.2335	2.00666	3.28082	3.45785	0
5.05809	1.69623	1.87272	1.86468	3.52851	2.30199	3.60499	4.6121	2.74313	2.36512	3.07544	2.50143	3.8402	0
4.83173	2.61626	0.797925	1.47213	4.24545	2.21533	3.92821	4.63513	3.10656	2.24781	2.9161	2.07042	3.46098	0
2.0403	1.55462	3.92121	1.00633	2.75602	1.93948	3.19582	4.06471	4.20735	2.63422	1.91665	3.35063	3.49678	0
1.39121	0.257802	1.52141	0.433921	0.340955	2.75963	1.41296	2.35023	1.5306	3.96583	4.74312	2.66345	1.79694	0
4.90076	2.322	1.39961	1.97929	4.05485	2.28843	3.88376	5.0102	3.16419	2.44817	3.23839	2.46474	3.62959	0
4.44346	3.29957	1.21882	1.53244	5.02279	2.2689	4.62718	5.15171	3.52583	2.75461	3.0734	2.53162	3.04174	0
5.19406	1.75871	1.09873	1.83395	3.30175	2.40038	3.22098	5.08103	2.28537	2.09899	2.98647	1.81289	3.8034	0
1.736	0.520217	1.64557	0.0157993	0.591613	2.89204	0.668704	3.34289	1.60146	4.08263	4.67605	2.67262	2.40212	0
2.39249	2.12467	1.46217	1.3788	3.85951	3.00793	3.35125	2.62446	2.52371	4.09271	4.08579	2.83656	2.23746	0
2.43823	2.52943	1.38667	0.64006	4.14938	2.99387	3.70483	1.74919	2.81566	4.00726	4.55092	2.64407	2.40509	0
4.68444	2.04129	1.09541	1.46291	3.79204	2.27814	3.76381	4.61693	2.8242	2.48447	2.86273	2.47588	3.51536	0
4.75297	1.8195	1.06849	1.88832	3.23902	2.00446	3.43674	4.50556	2.64876	2.27584	3.10409	2.20423	3.3972	0
5.17732	2.16653	1.09541	2.02675	3.75898	2.26658	3.64837	5.2454	2.82355	2.2371	3.13483	2.29756	3.85459	0
5.39182	2.02818	0.901871	1.96636	3.71381	2.47029	3.61692	4.90316	2.81102	2.30311	3.44875	2.34173	3.91019	0
3.85729	2.01639	0.523552	0.741287	3.60146	1.81591	3.56285	4.78034	2.61147	2.22989	2.95017	2.24907	2.6596	0
4.35254	2.03984	0.802063	1.07577	3.69567	2.09762	3.92463	5.01187	3.11933	2.63584	3.03804	2.79834	3.23709	0
2.01853	1.77564	1.23079	0.947294	3.28732	2.80231	2.83201	0.903357	1.96339	3.98624	4.08113	2.65574	2.30524	0
5.09813	2.62528	0.785445	1.68058	4.24831	2.32968	3.99816	4.87898	3.10161	2.55075	3.38641	2.28982	3.79548	0
5.01149	2.08104	0.434408	1.35612	3.72275	2.25724	3.61265	4.23329	2.78958	2.10445	2.10686	2.12527	3.70962	0
2.42445	2.61378	1.62479	0.560116	4.01993	2.7343	3.63382	1.11786	2.76904	3.91225	5.409	2.64407	2.27754	0
0.9366	1.81771	1.13472	0.375575	1.35358	1.3292	2.90388	4.60442	2.53598	2.25135	0.822579	2.41299	1.78617	0
4.23346	1.63841	0.87068	1.49035	3.24969	1.7719	3.47952	4.69903	3.02258	2.10309	2.99423	2.42763	3.15434	0
4.33489	1.63202	0.528399	0.918588	3.11171	1.84077	3.45336	4.3603	2.58444	2.15622	2.82289	2.22454	3.22178	0
4.88065	1.68816	0.721489	1.34846	3.3002	2.26075	3.53253	4.31696	2.7889	2.26774	3.24055	2.54896	3.7598	0
1.64197	0.957503	3.59436	0.635709	2.11808	1.22669	2.61213	3.14986	3.67181	1.93948	1.06849	2.83592	2.92205	0
1.41803	0.433921	1.51447	1.00973	1.23552	2.12867	3.17901	3.72087	2.81169	3.00793	2.68096	2.887	2.4218	0
2.93175	0.158008	1.5465	2.29329	1.36373	1.68207	2.97038	4.13002	2.42472	2.69621	3.06106	2.46474	2.45252	0
3.33302	2.54811	1.95728	0.777675	4.01879	3.34408	3.61113	2.50766	2.60254	4.3894	5.50558	3.1463	2.97188	0
1.16276	0.312235	1.2775	1.23834	1.15675	1.85816	3.03166	4.22106	2.41299	2.48353	2.7209	2.59353	2.0538	0
5.04786	2.15103	0.814407	1.44188	3.78058	2.28043	3.78152	4.22835	2.96507	2.4085	3.52159	2.36157	3.74527	0
3.93452	2.30199	1.03752	1.00973	4.00507	1.76438	3.72087	5.11475	2.75652	2.34702	2.52018	2.04398	2.7209	0
4.86428	2.49473	0.87068	1.41562	4.23651	2.37561	4.04029	4.71225	3.26152	2.59377	3.33815	2.52459	3.52518	0
2.66687	1.63841	0.730168	0.203982	1.21845	3.83969	1.27761	1.45136	2.80504	3.93088	4.37526	2.61711	2.7353	0
1.52809	0.987497	3.33815	0.462591	1.68814	1.33758	2.43741	3.10474	3.56757	1.45889	1.50514	2.53511	2.89923	0
4.24997	1.64896	0.905722	1.09493	3.17651	1.71418	3.49028	4.406	2.85578	2.04418	2.58693	2.14078	3.03327	0
1.58133	0.49518	1.39961	1.56458	1.29872	1.60828	3.19118	3.2119	2.59681	2.68857	2.70038	2.6802	2.2186	0
4.57124	2.07124	0.681856	1.12622	3.70193	2.01787	3.59881	4.34748	2.81895	2.10581	2.83462	2.38002	3.3026	0
1.1138	0.598323	2.82224	0.486215	1.82902	1.40512	2.31316	3.35758	3.19589	2.01787	1.32791	1.85428	2.24212	0
5.23809	1.92014	0.958529	2.1787	3.58612	2.38497	3.78333	4.6807	2.85514	2.26658	2.86147	2.56262	4.027	0
2.51722	2.3264	1.61	0.613794	3.77287	2.77453	3.51551	1.67594	2.52018	3.95547	4.72963	2.78754	2.55239	0
2.41047	2.42256	1.56439	0.622592	4.06936	2.91435	3.60591	1.23887	2.77043	4.02987	5.25629	2.79296	2.43535	0
1.0299	0.607867	1.68	1.06283	0.809313	1.85298	2.7906	5.05989	2.45723	2.73503	1.355	2.47957	2.23278	0
4.85563	1.93948	0.533235	1.25789	3.49298	2.04418	3.50093	4.78914	2.89619	2.04418	2.86713	2.21979	3.60765	0
2.30063	2.2323	1.06509	0.712395	3.79796	2.99895	3.35204	1.56828	2.36981	4.04029	5.2254	2.83915	2.64407	0
5.15533	2.3242	1.09873	1.45361	3.88817	2.53748	3.76618	4.84462	2.91968	2.8426	4.0141	2.56938	3.71395	0
4.41317	1.71615	0.814407	1.53244	3.37995	1.96471	3.3186	4.53941	2.486	2.26541	2.86084	2.02405	3.26828	0
5.12592	1.79046	1.03752	1.92507	3.26868	2.28729	3.27676	4.67965	2.3626	2.15493	2.60091	1.96187	3.74344	0
4.52531	2.07545	0.580963	1.29872	3.68675	1.96471	3.66417	4.34425	2.61147	2.08936	2.70481	2.15607	3.37437	0
4.52577	2.19683	0.806189	1.06607	3.80055	1.91034	3.75431	4.20411	3.0693	2.22869	2.72956	2.44111	3.18315	0
2.729	1.34036	1.16341	0.27563	1.03323	3.93995	1.46884	1.55002	1.49574	4.6337	1.31413	3.23186	3.09463	0
4.24318	2.06843	1.16025	1.18946	3.6281	1.96782	3.66068	4.31711	2.70849	2.20304	3.16139	2.51486	3.09112	0
3.87252	1.91851	1.18216	2.02128	3.64033	1.66771	3.79715	4.48584	3.02419	2.20056	2.84429	2.74667	2.64876	0
5.85541	1.77002	0.874616	2.09536	3.48656	2.77593	3.55932	4.95056	2.60417	2.46648	3.54133	2.3322	4.43025	0
3.91309	2.01044	0.668433	0.777675	3.59454	1.63202	3.6522	4.29758	3.04647	2.22748	3.26659	2.33751	2.887	0
3.85462	1.91851	0.677393	1.18946	3.59916	1.92177	3.31819	4.50856	2.17113	2.84194	3.06981	1.70366	2.73744	0
4.88623	1.57054	0.814407	1.479	3.15118	2.14842	3.26386	4.76442	2.151	2.122	2.90408	2.14845	3.59528	0
1.7031	0.376383	1.50514	0.167746	0.350888	2.74087	1.54772	3.46298	1.3683	3.99524	4.48563	2.56262	1.96187	0
0.878117	0.381666	1.69583	0.992678	1.05631	2.0528	2.82198	5.0001	2.3096	2.57934	1.07189	2.41102	1.8199	0
5.05695	1.42848	0.717132	1.42763	2.99574	2.2323	3.52756	4.45128	2.59599	2.26075	2.84621	2.54465	3.82896	0
4.77196	2.49194	1.363	1.57089	4.02295	2.17419	4.0713	4.89361	3.27624	2.34163	3.3271	2.60904	3.70037	0
4.6246	1.50299	1.01998	1.31466	3.08563	2.2323	2.98648	4.37866	2.4315	2.49101	3.47648	1.94804	3.23448	0
4.38482	2.68087	1.08538	1.16875	4.20778	1.88542	4.01567	4.98572	3.16419	2.45302	2.86525	2.47218	3.41335	0
4.80104	1.67594	0.580963	1.20405	3.29787	2.18683	3.3821	4.22951	2.65574	2.0528	2.9262	2.40212	3.55911	0
4.00603	1.8087	0.39881	1.22702	3.39029	1.72793	3.23354	4.20715	2.4666	2.25724	3.11297	1.86605	2.72379	0
1.26342	0.727454	1.57762	1.51712	1.42284	1.62988	3.41985	5.22822	3.12274	2.52853	0.681856	2.73673	2.22454	0
4.46489	2.63341	1.0129	1.22131	4.33282	2.11797	3.902	4.58217	2.97075	2.45881	3.20579	2.11479	3.14725	0
5.00875	2.27814	1.46461	1.35612	3.95954	2.28843	3.88795	4.82525	3.14582	2.63745	3.09762	2.54896	3.71691	0
4.48028	1.83019	0.890255	1.35867	3.40891	1.91851	3.57625	3.86042	2.83915	2.13397	2.97075	2.47773	3.29567	0
1.95033	0.423555	1.92775	0.250182	0.315982	3.32023	1.57054	4.73967	1.73061	4.38715	5.20064	3.01448	2.64015	0
4.02502	2.12734	1.01644	1.43715	3.7364	1.76438	3.42244	4.68876	2.61952	2.41153	3.27499	1.7698	2.78073	0
3.02474	2.14581	0.636701	0.551023	3.60576	1.70225	3.88562	4.31454	2.97695	2.4315	2.9981	2.7821	2.29093	0
4.01842	1.65316	0.523552	0.975405	3.39841	1.77377	3.45515	4.52121	2.27078	2.3242	2.63543	1.96795	2.85196	0
3.88016	1.7978	0.429353	0.737191	3.29046	1.66771	3.16287	4.5452	2.58444	2.02671	2.84108	1.80228	2.74597	0
1.35867	0.413146	1.30578	0.836458	1.32778	2.19434	3.35797	3.53913	2.9077	3.13275	0.850831	3.03327	2.6749	0
5.48744	2.41556	1.0129	2.08896	4.06104	2.5699	3.87674	4.43315	2.92739	2.17926	2.45441	2.06904	4.21392	0
2.58103	2.0223	4.74985	1.56879	3.16548	2.18934	3.77971	4.0363	4.82206	2.77382	2.74384	3.92668	4.17079	0
3.95106	2.4315	0.924816	1.00293	4.01519	1.7923	3.89142	4.23148	3.0215	2.47693	3.4042	2.39714	2.75582	0
5.31276	2.03839	0.890255	1.8124	3.59945	2.65028	3.68769	4.51093	2.98256	2.27468	3.24573	2.52459	4.02838	0
2.7453	1.60391	4.29648	1.34075	3.04294	2.16653	3.37089	4.25363	4.26059	2.71357	2.71435	3.30179	3.56225	0
4.37174	2.0149	1.07865	1.09493	3.67987	1.86333	3.44977	4.56474	2.61872	2.1445	2.97244	2.08135	2.96279	0
1.24676	0.792675	2.88762	0.528107	1.50158	1.10101	2.47788	3.3083	3.31272	1.69824	1.25438	2.0759	2.39813	0
4.93625	1.22669	0.439452	1.24676	2.68276	2.18053	2.9546	4.59553	2.24792	2.122	2.91848	1.8941	3.62871	0
1.77662	0.801166	2.09352	0.847939	0.847939	2.7225	1.59069	3.53419	1.89735	3.73908	1.08202	2.56092	2.59599	0
1.87893	1.13779	3.41589	0.769662	2.17042	1.94267	2.84128	4.04149	3.63719	2.51223	1.60146	2.79431	3.03486	0
2.58893	2.64868	1.40475	2.03895	4.17286	3.05431	3.83847	2.60799	2.64486	4.23329	4.49999	2.94785	2.48325	0
2.60066	1.22975	1.82339	0.245073	0.678739	3.75669	0.911224	1.753	1.41241	4.24082	5.23471	2.87525	3.12323	0
3.94538	2.20797	0.747384	0.866875	3.89118	1.77564	3.76618	4.18653	2.81434	2.32968	2.68547	2.29535	2.80837	0
5.36568	2.0528	0.59973	1.80904	3.6796	2.67778	3.79179	5.00109	3.12371	1.96938	2.76627	2.54551	4.15338	0
3.7404	2.21288	0.725834	0.75351	3.90633	1.82129	3.65922	4.27182	2.6542	2.2359	2.97751	2.28649	2.64798	0
3.71252	2.88197	0.969582	1.11692	4.49485	1.88542	4.2257	4.60271	3.42349	2.65346	2.90468	2.50323	2.75792	0
4.87222	1.85471	0.725834	1.53895	3.4598	2.28729	3.45049	4.65721	2.52195	2.19683	3.18315	2.29976	3.5281	0
4.87777	1.41815	1.07189	1.29336	3.08899	2.21777	3.18183	4.22072	2.29425	1.89878	2.86525	2.06904	3.56539	0
4.13735	2.26774	0.650371	1.21845	3.92667	1.79414	3.8443	4.60804	3.0449	2.46361	2.89069	2.47311	3.10656	0
5.04847	2.47598	0.834754	1.90071	4.03977	2.17036	3.91383	4.80718	3.04752	2.12734	3.0134	2.43631	3.70174	0
0.840295	1.64896	0.991417	0.260381	1.50604	1.45889	2.76177	4.63094	2.43823	2.18809	0.699588	2.25483	1.76245	0
4.83308	2.00446	0.464514	1.23552	3.58962	2.09212	3.45765	4.43193	2.45157	2.00745	2.47773	1.72871	3.42024	0
1.49485	0.290561	1.08538	0.855543	0.999524	2.2347	2.79267	2.72473	2.4638	3.18745	0.973246	2.68697	2.63701	0
4.7536	1.26286	0.699588	1.29067	2.81493	1.94426	2.87816	3.85587	2.19939	1.68207	2.15227	1.71143	3.42816	0
4.97941	1.26582	0.64127	1.24396	2.80037	2.26075	3.45443	4.80504	2.70038	2.21288	2.86525	2.49147	3.65765	0
5.40649	2.01935	1.10205	2.0603	3.73589	2.58361	3.63142	4.81603	2.82942	2.46457	3.40714	2.50413	4.04363	0
3.92042	1.62345	0.943648	0.793577	2.95445	1.91688	3.2806	4.87059	2.22808	2.55776	3.35218	2.2456	2.81632	0
2.58814	1.98478	4.46967	1.43002	3.28062	2.34163	3.77505	4.72701	4.709	3.13423	3.03486	3.48566	3.58735	0
2.45453	2.35237	1.95267	2.58103	4.08205	2.91619	3.70232	2.40038	2.67718	3.97885	4.17045	2.78822	2.1872	0
0.657357	0.169192	1.75875	2.55208	1.43478	1.42333	2.73063	4.50092	2.11347	2.42156	0.547674	2.26738	1.91983	0
0.209139	0.0679477	1.23376	0.0894141	0.0421209	0.544957	0.135584	3.11784	0.699588	0.922941	0.403926	0.703992	0.224964	0
1.64393	0.834657	2.17362	0.943739	0.541888	2.39732	1.04551	3.39548	1.69387	3.47111	0.755923	2.33856	2.27304	0
4.93957	1.44632	1.5666	1.98641	2.94289	2.04994	2.8628	4.94711	1.74008	2.16909	3.10557	1.551	3.65107	0
2.93455	2.18557	1.22482	2.06689	3.71201	2.83001	3.34448	2.824	2.32686	3.88771	3.88551	2.67338	2.40509	0
5.38846	1.94267	0.924816	1.65564	3.48978	2.36828	3.44472	5.15609	2.59106	2.35983	3.28868	2.36776	4.02325	0
4.85809	2.18683	1.20976	1.51932	3.95531	2.11528	3.74979	4.84969	2.93445	2.27353	2.44397	2.44492	3.54357	0
5.29505	1.93628	1.46703	2.26555	3.5319	2.27928	3.54471	4.95241	2.81367	2.12867	2.44873	2.36878	3.95971	0
1.90532	1.25989	2.12004	0.424288	2.09152	1.82486	2.37874	3.98455	3.49443	2.74596	1.05825	2.15859	2.20181	0
4.59013	2.21533	0.921018	1.52371	3.94802	2.09762	3.76381	4.95576	2.76766	2.50949	3.03167	2.26056	3.29074	0
4.65472	1.41296	0.83879	1.04976	3.10325	2.22264	3.5483	4.80995	2.8037	2.40445	2.8665	2.77181	3.5528	0
5.33153	1.64053	1.49574	2.20197	3.31139	2.40648	3.48821	4.71184	2.47957	2.10853	2.83979	1.92301	4.1546	0
5.10409	1.1574	0.690745	1.3459	2.65367	2.24068	2.90574	4.87415	1.92617	2.15103	3.0306	2.06352	3.77919	0
5.37952	1.2328	1.13472	1.96056	2.81744	2.44914	3.33687	4.85861	2.65265	2.14057	3.12808	2.50593	4.0787	0
4.81249	2.22142	0.797925	1.39121	3.78082	1.94426	3.66068	4.95847	2.731	1.92985	2.02261	2.07316	3.54037	0
4.74659	2.44329	0.9769	1.54326	4.02878	2.11259	3.73368	4.54243	3.00523	2.30759	3.14439	2.40212	3.30098	0
4.02163	2.81118	1.19757	1.26892	4.42698	1.6841	4.05454	4.91354	3.08508	2.50766	3.029	2.19818	2.81566	0
4.29749	2.85568	0.59037	1.19239	4.41138	2.11663	4.20968	4.59907	3.41698	2.54811	2.89923	2.63068	3.28745	0
4.05248	1.45387	0.814407	1.20405	3.1588	1.87698	3.01016	4.613	2.26511	2.19932	2.86525	1.90866	2.75512	0
1.65758	0.766914	1.57323	0.260381	1.52371	1.73183	1.73958	4.00768	2.77799	2.56211	0.690745	1.64968	1.71529	0
1.38378	0.682446	1.56217	0.870632	1.08857	2.11393	2.82131	2.27122	2.48141	3.11081	0.59037	2.64251	2.34279	0
0.16255	0.365788	0.747384	0.33099	0.239957	0.423555	0.360476	1.66977	0.822579	1.0132	0.403926	0.48437	0.936147	0
4.20086	2.15881	0.747384	1.02656	3.67801	1.61264	3.69419	4.20664	2.77593	2.12867	2.60742	2.26625	3.03698	0
5.36381	1.5773	0.764416	1.93256	3.20079	2.50857	3.27119	4.75578	2.45817	2.12066	2.64251	1.97249	4.08337	0
4.56128	1.85644	0.921018	1.22702	3.69698	1.97247	3.60036	4.36406	2.87463	2.12467	2.92857	2.14973	3.49376	0
2.59988	2.4085	1.90383	0.824885	3.94924	3.12632	3.62269	1.54078	2.99368	4.18325	5.50021	3.04121	2.63543	0
4.4266	2.03257	1.06509	1.1747	3.53128	2.0485	3.22907	4.69893	2.16613	2.29297	3.2031	1.82687	3.16838	0
4.29835	1.12454	0.609043	1.40835	2.50875	1.6615	2.64308	4.42585	2.07999	1.37589	2.49692	1.16655	2.82027	0
4.71066	2.24899	0.991417	1.1138	3.92251	2.04994	3.92194	4.46141	3.17856	2.58701	3.31151	2.79161	3.60614	0
1.59168	1.24491	3.62134	0.885563	2.18574	1.29217	2.86987	3.80095	3.80438	1.7719	2.03548	2.72668	2.98535	0
4.2851	2.46361	0.39881	1.06283	4.04808	1.94901	3.77687	4.59255	2.83073	2.25606	2.89436	1.95421	3.01827	0
4.44544	1.70225	0.59973	0.992678	3.32699	2.01639	3.19629	4.52956	2.30851	2.2323	3.14677	2.06767	3.19045	0
4.28408	1.91688	0.777068	0.989241	3.56252	2.13662	3.40642	4.31923	2.68322	2.57506	3.6369	2.28982	3.00304	0
2.33555	2.03403	1.01998	1.20694	3.73665	2.79198	3.30373	2.17546	1.95881	3.95395	3.81028	2.69221	2.33856	0
4.91593	1.39458	0.878542	1.29872	3.26988	2.04274	3.2486	4.71753	2.25138	1.95059	2.23512	1.81113	3.56507	0
1.46059	0.677878	1.00578	1.53244	1.13852	2.44914	2.7539	3.63322	2.48691	3.20044	1.79515	2.57023	2.24212	0
4.4115	1.7775	0.83879	1.97929	3.37492	1.87358	3.44074	4.58795	2.77387	2.04418	2.65497	2.22572	3.13627	0
4.70714	1.74343	0.738799	1.11692	3.47262	2.0223	3.31613	4.9303	2.31827	2.04994	2.99644	1.97701	3.34713	0
3.75085	1.58178	0.251862	0.733085	3.00827	1.79597	2.96398	4.6694	2.0052	2.04994	2.41887	1.37358	2.51841	0
4.78515	2.07545	1.06509	1.92054	3.73439	2.18431	3.71233	5.40696	2.93972	2.47882	3.27916	2.55581	3.53296	0
3.85417	1.03483	0.187041	0.678739	2.74799	1.59732	3.43382	4.14521	2.49238	2.06984	2.25598	2.60172	2.7026	0
0.626975	0.682446	1.63523	0.635709	0.110376	1.21439	0.197056	2.24662	0.734489	2.35237	0.743098	1.48625	1.14755	0
3.27626	2.71207	1.20976	1.85668	4.36064	2.9119	3.96067	4.3488	2.71362	4.0569	4.7106	2.76627	2.63306	0
4.95149	1.87017	0.56201	1.27712	3.5735	2.15233	3.57117	4.2431	2.74029	2.30311	3.71932	2.44206	3.68855	0
2.06689	1.65106	1.0129	0.21429	1.12313	3.25167	1.30941	2.93917	1.63938	4.41536	3.90352	2.93855	2.72884	0
5.1563	1.1735	1.10865	1.8023	2.69346	2.22506	3.27119	4.48123	2.76627	2.07965	2.78073	2.26511	4.02186	0
4.38035	2.2941	0.585672	1.08219	3.99504	2.18809	3.92821	4.52625	2.98647	2.56037	3.38417	2.36981	3.25728	0
3.98746	2.94751	1.55994	2.30792	4.57233	2.83533	4.16617	4.99895	3.07391	3.88864	4.27285	2.84043	2.88946	0
4.87568	2.30871	1.07189	1.48808	4.12364	2.15751	3.89142	4.66663	2.85514	1.98478	2.77043	2.20784	3.45261	0
5.40379	1.66564	1.24852	2.36638	3.05738	2.51769	3.38441	4.50381	2.60661	1.8495	2.45062	2.41887	4.16496	0
2.09791	0.520217	1.51214	0.270554	0.724841	3.44074	1.38661	1.332	1.62269	4.55621	4.13603	3.16978	2.60417	0
4.2929	2.31205	0.768645	0.996105	3.87164	1.95217	3.65484	4.46219	2.67793	2.56558	3.47614	2.1395	2.93386	0
4.69335	2.53748	1.07189	1.64393	4.10088	2.13397	3.9118	5.03137	2.9155	2.35876	2.80237	2.20904	3.38828	0
4.4161	1.73958	1.08538	1.01649	3.49266	1.98325	3.56221	4.81987	2.96734	2.38394	2.39813	2.57023	3.27624	0
4.64343	1.85989	0.632121	1.18946	3.51232	2.126	3.51112	4.64476	2.61711	2.42356	3.13867	2.44588	3.53425	0
4.74759	1.97402	0.802063	1.40348	3.63451	2.2092	3.62329	4.79712	2.64329	2.40242	2.51575	2.2398	3.4575	0
4.31087	1.46387	0.760175	1.11692	2.87888	1.74535	3.42207	4.14036	2.66191	2.12734	2.97075	2.39213	3.01665	0
2.79139	0.65948	2.45252	0.836458	0.975405	3.48474	1.87017	3.73746	2.329	4.36319	1.44253	3.1482	4.12875	0
4.06322	2.0935	0.878542	0.757564	3.79252	1.79414	3.74284	4.56992	2.66498	2.31538	2.61872	2.25483	2.97131	0
3.19002	1.84776	1.11849	0.290817	1.24676	4.28844	1.46636	0.847022	1.68992	4.80067	0.712764	3.44064	3.45645	0
2.01025	0.938411	2.07316	1.33299	1.15373	2.8807	1.65525	3.03601	2.60417	3.94303	2.1459	2.69445	2.741	0
4.70923	1.88877	0.645826	1.94148	3.63534	1.97864	3.57308	4.61379	2.6989	2.15233	2.78278	2.19209	3.34985	0
2.0851	2.16267	1.041	0.789617	3.81155	2.51406	3.45978	1.38394	2.36981	3.65425	4.11077	2.37186	1.92617	0
5.1306	2.51314	0.566766	1.58962	4.26621	2.53302	4.061	4.82897	3.20265	2.45785	2.74171	2.62591	3.79647	0
3.3457	1.58178	0.34712	0.69144	2.83424	1.38394	2.9546	4.74372	2.32579	2.122	3.29526	1.55324	1.98897	0
4.34135	2.2323	0.987803	1.06931	3.84318	1.83549	3.67255	4.31591	2.79565	2.38082	2.74738	2.26852	3.24314	0
4.2037	2.51223	0.842815	1.01985	4.14622	2.0485	4.13457	4.86405	3.25515	2.26541	3.4634	2.64486	3.02472	0
2.17161	0.544957	1.87272	0.64006	1.43478	3.20504	2.19184	3.27291	2.25598	4.31983	4.54235	3.22266	2.71216	0
0.904007	0.219239	0.609043	0.900337	0.922209	1.59069	2.49566	3.21281	1.98301	2.52493	0.552464	2.08135	2.06491	0
4.04402	2.24662	0.659426	0.947294	3.85082	1.68003	3.6371	4.43637	2.85387	2.39424	2.73887	2.07453	2.57527	0
1.24955	0.826355	2.47773	0.541888	1.82406	1.58624	2.2359	3.82249	3.28373	2.38186	1.03752	1.94959	2.12266	0
4.85407	1.77936	0.785445	1.36373	3.26507	2.21655	3.34128	4.67226	2.76558	1.93788	2.74242	2.25483	3.54261	0
1.18946	0.535096	1.3683	1.53462	0.95084	1.77002	2.96573	2.67855	2.74738	2.64868	0.668433	2.56938	2.48508	0
5.1606	2.0223	1.07865	2.07212	3.6395	2.50674	3.63651	5.22518	2.73243	2.27814	3.14582	2.27978	3.89725	0
4.79225	1.63628	1.14436	1.10125	3.28338	2.2323	3.51484	4.78043	2.68472	2.07825	2.93504	2.53598	3.67406	0
5.195	1.0561	0.695173	1.71601	2.6522	2.39116	3.11884	4.01629	2.43727	1.93788	2.2809	2.32365	3.85107	0
2.81556	1.36508	1.31135	0.486215	1.46522	3.90611	1.94901	0.961289	2.07316	4.47712	2.18597	3.17024	3.13339	0
2.50704	2.56904	1.10205	0.64006	4.19944	2.92896	3.76801	1.67798	2.8242	4.10568	4.02424	2.83527	2.44302	0
1.8742	1.52205	1.07528	1.59168	3.02627	2.70228	2.81727	2.3373	1.89898	3.79968	4.83893	2.51308	2.06629	0
2.84772	0.469854	2.5481	3.52386	1.67678	1.9054	2.3209	4.99344	1.91346	2.84128	3.22837	1.81289	2.33856	0
5.33102	1.51732	0.905722	1.84375	3.04645	2.31316	3.22773	4.57297	2.57694	2.10445	3.05118	2.06767	3.88574	0
3.58932	2.07545	0.672919	1.04976	3.81341	1.44125	3.65805	4.78933	2.9143	2.26541	2.61631	2.15985	2.26965	0
4.53112	2.39527	0.760175	1.57717	4.09019	2.17036	4.04487	4.58089	3.10161	2.22627	2.03121	2.46753	3.42744	0
4.32866	1.83725	1.64351	2.37322	3.52479	3.12929	3.31696	5.22408	2.35535	4.0124	4.41592	2.72452	3.27957	0
2.60377	1.33479	1.24559	0.10514	0.914957	3.83603	1.44884	2.14581	2.40212	4.15166	4.7031	2.74667	3.05951	0
2.57467	1.41815	0.890255	0.345926	1.03655	3.76408	0.677878	2.23949	1.19143	4.2525	0.203329	2.7855	2.97695	0
4.35186	2.76746	0.874616	1.14767	4.43961	1.88205	4.06179	4.87033	3.04016	2.38704	3.53812	2.05519	3.11933	0
0.591613	0.219239	1.50514	1.80736	1.15976	1.76438	2.91925	4.43153	2.42472	2.76248	2.99975	2.33113	2.04115	0
3.39806	2.17926	1.2889	1.1044	3.73439	2.81186	3.4605	4.95152	2.34173	3.89971	4.37553	2.68171	2.7274	0
4.21262	1.71022	0.645826	0.992678	3.3156	1.69019	3.60898	4.37581	2.67945	1.95846	2.7628	2.379	3.00304	0
2.10931	0.474942	0.822579	1.45594	0.881845	1.59952	2.63745	3.02179	2.1459	2.46648	2.75722	2.151	1.99638	0
4.58563	1.56828	0.764416	1.20694	3.28417	1.8871	3.1986	4.85146	2.30305	2.06561	2.99091	2.04257	3.2577	0
4.85053	2.17546	-0.703992	1.88364	4.00909	2.01342	4.0893	4.62862	3.04595	2.2311	2.75652	2.6472	3.67322	0
4.69903	1.72988	1.17594	1.36878	3.37744	2.21533	3.4098	4.4775	2.86964	2.43051	3.57007	2.41789	3.5349	0
5.37519	1.57054	0.454521	1.64	2.99731	2.46648	2.98305	4.32614	2.00227	2.15622	3.34011	1.61	3.96265	0
5.33686	1.64686	0.772862	1.56458	3.31941	2.39322	3.53088	4.45168	2.73028	2.07124	2.8968	2.47496	4.04808	0
4.86599	1.93146	0.59037	1.51049	3.5496	2.34594	3.40191	4.51105	2.38407	2.16524	3.31392	2.05519	3.49443	0
5.46139	2.44427	1.34694	1.94739	4.14455	2.59461	3.9461	4.69603	3.00741	2.34916	3.06467	2.46193	4.06683	0
4.61359	2.07545	-0.15432	1.44658	3.82128	2.11663	3.83822	4.46936	2.81632	2.45592	3.14297	2.40013	3.4075	0
4.40625	2.50582	0.834754	1.85989	3.96813	1.94743	3.87133	4.6711	2.8057	2.2323	3.60253	2.2809	3.04332	0
5.0605	1.76627	1.11194	1.97213	3.34199	2.29749	3.4697	4.97677	2.57191	2.08243	2.83203	2.33856	3.73661	0
5.09813	2.71581	1.47187	2.05501	4.45588	2.24781	4.27608	4.88791	3.33697	2.41856	3.01177	2.75372	3.79373	0
4.39747	1.63202	0.654904	1.37129	3.23779	2.00145	3.53121	4.46871	2.79363	2.19559	2.86336	2.35535	3.18726	0
1.52152	0.830512	3.09812	0.582667	1.91903	1.24491	2.26658	3.41241	3.41625	1.99844	1.02702	2.45157	2.52635	0
4.51891	2.40546	1.29173	1.12003	4.07402	2.25724	3.73854	4.34763	2.86336	2.89455	3.59132	2.28426	3.34869	0
4.78418	2.49752	0.760175	1.57299	4.10697	2.16139	3.9311	4.57694	2.94959	2.42754	3.36525	2.5677	3.55343	0
1.62812	0.922941	2.03264	0.635709	1.67868	1.62988	2.24306	4.62707	3.11346	2.57335	0.909562	1.8941	1.46703	0
2.64924	2.34809	1.10865	1.84213	4.10297	3.07906	3.68684	2.88386	2.62432	4.13729	4.4805	2.84685	2.53685	0
4.89131	0.696078	0.826649	1.34075	2.53563	1.95059	2.73576	4.56804	2.22926	2.05566	2.15733	1.96187	3.62459	0
3.12842	3.47847	1.97701	1.12622	5.1039	2.92654	4.64116	1.29217	3.47477	4.07957	5.26714	3.00851	2.59188	0
2.25795	1.25093	1.62898	0.345926	1.14158	3.52489	2.15363	0.740717	2.32793	4.14916	3.16232	3.1242	3.03857	0
2.04968	1.35963	3.89027	0.947294	2.1834	1.52441	2.81524	3.4951	3.88505	2.10172	1.97551	3.07951	3.29567	0
5.15094	2.48634	0.672919	1.77662	4.11181	2.33838	4.10959	4.90468	3.46063	2.2689	2.58361	2.8526	3.72707	0
5.18514	2.25135	1.37621	1.80736	3.88298	2.36828	3.88376	5.13283	2.93855	2.36512	3.07798	2.46286	3.92362	0
4.46622	2.68087	0.802063	1.22986	4.34259	1.75681	3.96347	3.86589	2.982	2.07685	2.37697	2.07316	3.13291	0
5.20828	1.68207	0.772862	1.64	3.36407	2.27006	3.90315	4.70602	3.34128	2.49473	3.01611	3.02633	3.91924	0
0.665942	0.0905429	0.854823	0.851746	0.661655	1.15415	2.3777	4.18204	1.7268	2.25253	0.793777	2.01973	1.50514	0
4.39462	1.72206	0.991417	1.00633	3.21186	1.74343	3.20229	4.46089	2.45629	2.34916	3.23404	2.04257	3.20489	0
3.25619	0.295992	1.1945	1.66722	1.4324	2.05137	2.97731	2.73723	2.33007	2.91497	3.4575	2.52635	2.61066	0
2.95882	1.94267	1.44501	0.152146	1.8852	4.02705	1.71022	1.73377	3.39014	4.359	0.429353	3.06416	3.23925	0
1.12622	0.386939	1.02351	1.26892	0.813221	1.81051	2.771	2.72989	2.28871	2.63098	1.63523	2.40806	2.51841	0
4.84326	0.822186	1.02702	1.69564	2.49675	2.31869	2.7582	4.56238	2.21384	2.14319	3.24098	2.02405	3.65993	0
5.44292	1.42591	1.08538	1.76443	2.9267	2.64629	3.43455	4.63028	2.66498	1.99542	2.68697	2.27078	4.15008	0
4.84781	2.32968	0.659426	1.23834	3.89204	2.28043	3.90725	4.42612	3.21869	2.2907	3.20713	2.51308	3.51766	0
1.59374	0.418356	0.991417	1.10754	1.03655	2.29974	2.96573	2.8105	2.27191	3.14159	1.0129	2.74313	2.91908	0
5.21626	2.1601	0.48437	1.65758	3.86195	2.54103	3.9262	4.67491	3.12323	2.18431	3.43495	2.58941	3.95251	0
2.3315	1.05961	2.70481	0.6444	0.992678	2.55688	2.00596	2.8826	2.741	3.54993	1.45485	2.50772	2.60335	0
4.43037	2.45785	0.882457	0.999524	4.11405	2.08521	3.85994	4.53407	2.8796	2.43741	2.76419	2.15859	3.29771	0
1.59784	0.58873	1.47428	0.188482	0.573678	2.78712	1.32076	3.99462	1.40731	4.05748	4.67543	2.6802	2.58527	0
4.36814	2.13662	1.0129	1.46753	3.92314	1.9021	3.73096	4.89098	2.97864	2.3242	3.07391	2.36981	3.17533	0
4.14555	3.11031	1.78617	2.18807	4.75524	3.48092	4.43825	5.30669	3.27874	4.51998	5.10674	3.22968	3.36334	0
5.04806	1.66564	1.22482	1.96491	3.24519	2.25371	3.17854	4.92208	2.35222	2.06702	3.47271	2.07179	3.70745	0
4.15567	1.83901	0.954824	0.844122	3.31024	1.88877	3.57657	4.5961	3.01502	2.17673	3.11051	2.43343	2.83332	0
3.5496	2.0528	1.01998	0.665942	3.44379	1.92014	3.55123	5.05514	2.68622	2.51406	3.64039	2.05519	2.21503	0
2.05898	1.97402	1.47908	1.94592	3.51075	2.68242	3.15999	2.94751	2.38407	3.72961	4.82125	2.39012	2.09754	0
2.86342	1.53845	0.595056	0.152146	0.878117	4.04804	1.45387	1.58624	1.53744	4.40448	1.66798	3.21426	3.26617	0
4.32811	3.23755	1.16655	1.31993	4.95171	2.36828	4.7353	4.59679	3.9033	3.2009	4.0374	3.31312	3.44311	0
3.17255	2.04994	1.22182	0.224574	1.64	4.25314	1.28345	0.826355	1.74571	4.33835	3.08002	2.9898	3.49039	0
4.20417	1.50779	0.434408	0.925821	3.06083	1.68816	3.07123	4.15166	2.34173	1.57505	2.78618	1.78617	2.92146	0
3.95086	2.15493	1.04793	0.704045	3.93019	1.76627	3.75032	4.91562	2.86838	2.4807	3.06622	2.37595	2.89007	0
4.34996	2.10309	0.814407	0.989241	3.87863	1.95689	3.77945	4.5108	2.49056	2.44036	2.78073	2.25483	3.14487	0
4.62408	1.92014	0.434408	1.05631	3.49745	1.88877	3.4951	4.25733	2.47032	1.7122	3.15528	1.91824	3.29362	0
4.5055	1.42591	0.882457	1.12931	3.09329	1.78308	3.22098	4.5388	2.40806	2.31205	3.07951	2.25598	3.14725	0
0.821007	0.224769	1.32791	2.08896	1.15675	1.32076	2.28158	3.66678	1.9434	2.31093	0.681856	1.99342	1.86438	0
4.55177	1.57954	0.659426	1.12003	3.44278	2.16524	3.3054	4.42761	2.46286	2.14973	2.92739	1.83551	3.079	0
5.13228	2.25253	0.668433	1.40592	3.81782	2.24662	3.71454	4.64519	2.7628	2.33838	3.28414	2.19818	3.77893	0
5.02029	2.09625	0.995021	1.60803	3.75652	2.27928	3.65951	4.76452	2.89436	2.34486	3.19544	2.49238	3.76237	0
4.11215	2.11663	1.31135	1.36878	3.65812	1.66771	3.58634	4.90375	2.81102	2.22021	2.73744	2.08407	2.90468	0
3.68437	2.5887	1.05825	1.32778	4.31186	1.96159	3.90816	4.88748	2.95707	3.02179	3.07849	2.1548	2.58941	0
5.27477	2.15233	0.83879	1.55822	3.82932	2.3264	3.65484	3.93664	2.7495	2.46169	3.4075	2.47403	3.93752	0
4.40174	2.178	0.958529	1.56035	3.78082	1.99239	3.68882	4.46949	3.02204	2.32968	2.93328	2.44206	3.25088	0
4.02087	1.79414	0.987803	0.805394	3.51576	1.79597	3.60345	4.59002	2.89375	2.36722	3.28373	2.412	2.92443	0
3.49362	1.98018	0.987803	0.892969	3.68093	1.88373	3.48613	4.40752	2.37186	2.45495	3.18543	2.0369	2.58858	0
2.03895	0.915141	1.54424	0.350888	0.476795	3.07594	1.66357	4.66844	1.67401	4.27182	4.71159	2.97018	2.52283	0
1.93554	1.30941	4.15841	0.940174	2.5991	1.60172	3.15566	3.84479	4.16014	1.99995	2.6711	3.2594	3.35565	0
5.7133	1.28637	1.23969	2.23815	2.90336	2.70077	3.26299	4.85553	2.5541	1.83901	2.49873	2.14973	4.40001	0
5.26709	2.06984	0.64127	1.84538	3.79654	2.43741	3.69306	4.50493	2.97018	2.15103	2.64564	2.34489	4.06417	0
4.5055	1.21129	0.806189	1.11692	2.841	1.71615	3.33647	4.82197	2.47957	1.82841	2.65652	2.14718	3.24702	0
4.3652	2.42256	0.632121	1.43715	3.92438	1.87528	3.65542	4.34278	2.54292	1.95532	2.30305	1.69779	3.00468	0
1.12003	0.645552	1.8164	1.38378	0.892969	1.95532	2.73869	4.55835	2.54982	2.93258	0.785445	2.64486	2.11611	0
3.19175	3.13963	2.23512	2.59129	4.88209	3.70344	4.36651	3.61692	3.40824	4.75227	5.30412	3.51273	2.88145	0
2.10552	0.965065	0.846829	0.340955	1.02656	3.43382	1.11115	0.691546	1.57762	3.96755	2.51397	2.60904	2.71945	0
5.16885	1.78862	1.14116	1.92205	3.57143	2.34055	3.66126	4.68154	2.8796	2.13793	3.07493	2.53511	3.83448	0
3.97409	2.10717	0.654904	0.896658	3.74787	1.80689	3.79384	4.20614	2.90105	2.33295	3.03804	2.47218	2.75862	0
4.52577	1.44884	0.725834	1.09809	3.20634	2.0528	3.52356	4.0371	2.83397	2.3198	3.03007	2.41495	3.31633	0
5.08817	2.25253	1.46945	1.94592	4.09424	2.2689	4.0391	5.16338	3.09363	2.55601	3.48295	2.39913	3.79274	0
2.3048	0.510237	1.84408	0.457837	0.609379	3.10576	1.2419	4.10231	1.33338	4.07168	4.76741	2.83656	3.73185	0
4.96157	2.06984	1.03403	1.63011	3.85618	2.44524	3.81578	4.30556	2.97751	2.31093	3.17117	2.52899	3.63865	0
4.68493	2.46265	0.924816	1.4971	4.12483	2.20674	3.94435	4.32389	3.17671	2.2311	2.84429	2.43727	3.32313	0
5.08772	1.6841	1.11849	1.64589	3.34496	2.3198	3.57847	4.87648	2.5761	2.06136	2.94901	2.27529	3.71691	0
4.90365	1.62345	0.542873	1.37129	3.04894	2.15881	3.49579	4.36608	2.63385	2.15622	2.12135	2.43439	3.60314	0
2.76333	1.39722	1.57102	0.152146	0.777675	3.99023	1.3732	2.9899	1.77529	4.45419	5.43095	3.07237	3.1909	0
4.93542	2.03111	1.2775	1.46059	3.7575	2.15363	3.63442	4.38447	2.91011	2.22748	3.21293	2.4218	3.60884	0
4.49462	3.29538	0.585672	1.49485	4.86225	2.49659	4.49486	4.76384	3.37853	3.29202	3.59132	2.54896	3.30057	0
1.18358	0.650207	2.65574	0.518869	1.52371	0.998573	2.30982	3.56798	3.19995	1.71813	0.814407	2.46847	2.33962	0
1.58133	0.805394	2.52811	0.604953	1.87262	1.43616	2.22748	3.45013	3.28579	1.94267	1.16025	2.10155	1.88429	0
5.15739	2.1353	1.03403	1.58548	3.78776	2.49288	3.74632	4.51205	3.00194	2.25017	3.49208	2.53685	3.97145	0
1.13546	0.696078	1.66596	0.6444	1.53027	1.74343	2.19683	4.05001	3.18589	2.57849	0.924816	2.10819	1.97701	0
3.7053	1.14763	0.104941	0.761607	2.95554	1.60391	2.99387	3.98054	2.15733	1.94584	2.46474	1.78255	2.50772	0
0.622592	0.579088	1.57102	0.87438	0.600517	1.3732	0.413146	1.94426	1.15709	2.13793	0.764416	1.03403	1.55771	0
4.75741	1.56375	0.331432	1.14463	3.04094	2.16267	3.23755	4.40876	2.66881	2.00596	3.18315	2.10421	3.50943	0
2.70404	0.263281	3.7031	4.93421	3.23655	2.26774	3.14012	2.49008	2.70702	3.16907	3.69186	2.07726	2.15733	0
4.70113	1.94107	1.0129	1.18946	3.53743	2.22385	3.67226	4.67818	2.9792	2.22385	2.32257	2.46567	3.49879	0
1.94296	0.736308	3.12371	0.604953	1.78353	1.71022	2.16139	3.36072	3.22001	2.27237	1.42001	2.44778	2.29093	0
2.95936	1.93146	2.17981	0.27563	1.38626	4.09611	1.7978	2.73942	3.12856	4.24506	5.06193	3.07849	3.47784	0
1.98924	1.11786	3.92559	0.85933	2.4263	1.97402	3.0322	3.63172	3.93038	2.22264	2.01829	3.13723	3.30828	0
2.53563	1.11786	1.43757	0.295865	0.591613	3.60683	1.14436	0.544957	1.4524	4.15504	4.96377	2.84749	2.80637	0
3.53651	1.81771	0.818499	1.17767	3.42307	1.54541	3.51988	4.41741	2.77868	1.9771	2.93621	2.29204	2.70996	0
4.74997	2.26192	0.878542	1.48582	3.97626	2.16139	3.91564	4.49347	3.1208	2.46073	3.1567	2.72884	3.48193	0
4.47334	2.50214	0.760175	1.30406	4.20385	2.07405	4.10437	4.57915	3.20668	2.40038	2.70112	2.67262	3.45436	0
5.31104	2.1601	1.17906	2.16686	3.89654	2.56124	3.92284	4.29604	3.12566	2.28387	2.85641	2.55922	4.05309	0
4.54598	1.94584	0.951109	0.996105	3.5362	1.99995	3.47602	4.66364	2.72884	2.10581	3.1534	2.23161	3.25302	0
3.48042	3.03057	1.51679	1.3788	4.70638	3.34369	4.27655	4.28424	3.22001	4.44558	4.56978	3.2013	2.94901	0
1.94296	1.10101	3.88369	0.797526	2.45453	1.64896	3.02234	3.60098	3.84067	2.00745	1.98451	3.09212	3.29033	0
4.84284	1.73377	1.00934	1.34846	3.21313	2.16909	3.47602	4.25957	2.36776	1.92663	3.15009	2.25827	3.53167	0
4.35565	2.00296	0.747384	1.09175	3.55983	1.93307	3.36894	4.70694	2.4942	2.24781	3.14487	2.25827	3.13098	0
3.98804	1.67183	1.66999	2.15247	3.27864	3.13767	3.04035	5.26269	2.09217	4.14342	4.61877	2.94147	3.06313	0
2.6676	1.33479	1.22182	0.448299	1.60192	3.78384	1.51256	0.574248	1.89735	4.39906	3.90397	3.00851	3.02365	0
4.51511	1.89045	0.789617	1.5411	3.57055	2.02671	3.82768	4.44532	2.83138	2.33622	2.9143	2.65806	3.38977	0
0.75351	0.252314	1.5465	1.27984	1.09493	1.48605	2.98362	4.4268	2.43727	2.31427	2.4942	2.44015	2.07179	0
2.85318	1.76815	2.1459	0.409769	1.55184	4.01404	1.59069	0.859283	2.85196	4.41248	2.82486	3.04805	3.35295	0
3.16725	1.49334	1.25729	0.866875	3.23531	1.23584	2.96281	4.86693	2.09217	2.15233	2.93504	1.51679	1.89898	0
4.08754	2.54103	1.06167	1.6537	4.21434	1.92824	4.0978	4.67734	3.28497	2.39936	2.98088	2.55752	2.96051	0
4.95372	1.87188	0.734489	1.31466	3.3087	2.16781	3.41725	4.39557	2.49238	2.28729	3.09062	2.29976	3.55911	0
4.72169	1.50539	0.995021	1.34075	3.16636	1.93468	3.38133	4.59576	2.53249	1.85816	2.49147	2.12396	3.45156	0
4.90584	2.31427	0.533235	1.4324	3.89032	2.24662	3.76329	4.33346	3.05899	2.29297	2.84621	2.65497	3.68882	0
4.62367	1.72988	0.764416	1.61812	3.43874	2.00145	3.54536	5.14862	2.6275	2.122	3.01989	2.18843	3.37928	0
5.43629	1.85644	0.469494	1.84538	3.59657	2.66451	3.54732	4.64149	2.47773	2.20304	2.8242	2.25941	4.16238	0
4.45024	2.47314	0.764416	1.1044	4.18383	2.13265	3.82793	4.12674	3.09112	2.31427	2.17734	2.35535	3.1208	0
4.72103	1.88036	0.965908	1.25234	3.46934	2.12467	3.92441	4.43355	3.16699	2.45688	3.15387	2.78618	3.58459	0
4.87012	1.99239	0.921018	1.20983	3.61657	2.11528	3.64778	4.4984	2.89436	2.0149	2.9321	2.48049	3.59041	0
1.22986	0.569396	1.62269	1.17173	0.896658	1.65733	2.86795	4.17073	2.47773	2.52493	2.58444	2.46847	2.02117	0
4.72431	1.98325	0.785445	1.28527	3.46836	2.09212	3.3149	4.71042	2.8097	2.21043	2.64094	2.18597	3.35179	0
1.13239	0.65485	2.07042	0.840295	1.59374	1.64686	2.28043	3.78281	3.24874	2.322	0.523552	2.09888	1.8286	0
3.79228	2.01044	1.07528	0.813221	3.49618	1.59732	3.44941	4.81207	2.81169	2.53748	3.14392	2.08813	2.85704	0
3.91014	2.37352	0.89801	0.957905	3.99388	1.77377	3.70539	4.49195	2.83592	2.35451	2.9321	2.12917	2.69072	0
5.25473	1.95217	0.818499	1.62213	3.58349	2.45398	3.6154	4.33479	2.63068	2.07405	2.74738	2.0759	3.9113	0
4.03382	2.25489	0.636701	0.996105	3.89953	1.73183	3.5496	4.87734	2.45441	2.36617	2.87089	1.986	2.85957	0
4.85251	1.7978	0.523552	1.38378	3.34161	2.18557	3.15615	4.63732	2.31502	1.91362	2.0482	1.64968	3.43602	0
1.14767	0.645552	1.5191	0.340955	1.34333	1.20195	1.78677	3.64749	3.13675	2.1601	0.764416	1.75875	1.25438	0
4.56249	2.08104	1.10865	1.18358	3.71381	2.15233	3.92843	4.70653	2.99423	2.56037	3.37513	2.7274	3.43744	0
4.74769	1.79046	0.89801	1.49035	3.42273	2.27237	3.35718	4.76828	2.34699	2.25841	3.29812	2.19939	3.41662	0
3.85707	2.21777	0.764416	1.03987	3.87318	1.87188	3.59788	4.84684	2.75652	2.26658	3.12128	2.17362	2.63068	0
4.02502	1.56375	0.793777	1.03987	3.19261	1.93307	3.49613	4.13384	2.73744	2.2689	3.3107	2.50503	3.0003	0
2.5113	2.61213	1.31413	1.40348	4.11766	2.97269	3.75696	2.15751	2.73243	4.09139	3.75334	2.6802	2.58361	0
4.72093	1.91362	1.39704	1.90991	3.63145	1.9054	3.34767	4.83737	2.53162	1.7923	2.0962	1.60787	3.46167	0
4.2007	2.10445	0.928603	0.866875	3.67053	1.6841	3.43273	4.40793	2.45157	2.17546	3.13098	1.68597	3.01611	0
4.05777	1.89045	0.59037	1.17767	3.43025	1.68816	3.53716	4.34071	2.61711	2.04562	2.329	2.39414	2.92383	0
4.25027	1.20195	0.622925	0.769662	2.68491	2.0149	3.16287	3.97012	2.50413	2.28729	3.3789	2.26965	2.99091	0
0.198821	0.397453	1.39186	0.564647	0.85933	0.664098	1.68613	1.98325	2.44968	1.1044	0.224964	1.44501	1.5028	0
4.31369	2.61047	1.22482	1.16576	4.23909	1.96471	4.23	4.45866	3.47305	2.5595	2.99479	2.94901	3.27206	0
0.564647	0.696078	1.42506	0.76564	0.167746	1.33479	0.20816	2.6924	1.07528	2.30199	0.686307	1.42001	1.17906	0
4.38495	1.47871	0.760175	0.918588	2.80609	1.76815	2.6901	4.62184	1.73061	2.01193	2.72956	1.61425	2.76211	0
4.67427	1.49092	1.03403	1.20405	3.08803	2.03839	3.47041	4.83521	2.76766	2.19059	2.70996	2.52106	3.46755	0
4.19881	1.82841	0.429353	0.985795	3.50728	1.90869	3.37864	4.22239	2.6275	2.11393	3.02687	2.17237	2.9747	0
4.51787	2.04418	0.984178	1.18653	3.64474	2.02964	3.70008	4.74293	2.87712	2.3777	3.16559	2.57945	3.27373	0
0.670218	0.636205	1.7569	0.360788	0.992678	1.00956	1.90044	3.64335	2.33751	1.73958	0.659426	1.40475	1.23673	0
4.77116	1.56147	1.10535	1.33558	3.13895	2.14319	3.11984	4.52686	2.41789	2.23829	3.36257	2.06214	3.65136	0
5.4008	1.57054	2.34384	1.87736	3.15343	2.72102	3.25079	4.79441	3.10706	2.47693	3.07186	2.3595	4.10877	0
1.92957	1.42848	4.12446	0.954377	2.53729	1.55232	3.21917	3.62992	4.17318	2.22385	2.21503	3.36142	3.38491	0
0.50959	0.687003	1.82339	1.0299	0.404911	1.45387	0.650207	2.34594	1.266	2.44134	0.734489	1.55994	1.54424	0
1.20694	3.92463	4.19659	0.33099	4.39916	1.11115	4.29046	3.94938	6.69746	2.33622	1.13149	3.72361	1.92775	0
2.54799	2.74957	1.59931	1.57299	4.36386	2.83666	3.91293	1.49818	3.05118	3.93885	4.48887	2.79025	2.41299	0
1.55397	0.163603	1.52601	0.335977	1.04647	2.22264	2.7321	1.34313	2.6542	3.15903	0.91721	2.72235	2.71726	0
4.63385	1.81051	0.980544	1.18653	3.45349	2.06702	3.56894	4.74441	2.64486	2.31648	3.22837	2.44015	3.33106	0
2.36147	2.42455	0.357534	0.609379	3.98433	2.76746	3.56285	1.65733	2.49511	3.92642	2.9898	2.67793	2.329	0
3.89547	2.37978	1.06509	1.16276	4.03382	1.79597	3.80852	4.65084	2.95765	2.33295	2.53598	2.12527	2.60985	0
1.53678	0.626808	3.58521	4.89044	3.15028	1.77564	3.71757	3.3149	2.98814	2.6901	2.63937	2.62989	2.2809	0
3.92791	2.24544	0.39881	1.10754	3.99427	1.90044	3.88539	5.01202	2.88392	2.56818	2.67793	2.53859	2.81566	0
4.85333	1.96782	1.355	1.56879	3.57851	2.18305	3.56989	4.92727	2.87712	2.3198	2.97583	2.3595	3.59193	0
0.954377	0.407925	1.30578	0.741287	0.712395	1.70225	2.53837	4.24473	2.21622	2.27584	2.63227	2.151	1.88264	0
4.15303	2.80025	0.755923	1.10125	4.49002	2.36617	4.23641	5.06991	3.4042	2.93917	3.60914	2.66191	3.08911	0
2.20542	0.980062	2.18105	0.817119	1.30937	2.94156	2.04274	3.56574	2.66728	3.94698	2.88639	2.75582	2.75792	0
4.63987	1.60172	0.165247	1.19532	3.03893	1.95532	3.17901	4.88019	2.32257	2.12066	2.41593	2.25598	3.26025	0
5.10038	2.178	1.20063	1.45127	3.82818	2.39013	3.76355	4.46715	2.70996	1.99542	2.90468	2.35013	3.7807	0
2.93845	2.87816	1.68597	0.828753	4.49438	3.39358	4.06898	1.3705	3.31874	4.57355	5.80794	3.26533	2.86901	0
2.74866	1.69221	1.47908	0.270554	1.21271	3.85467	1.06661	2.60382	2.55496	3.89304	3.94311	2.59023	3.01719	0
2.6485	2.52132	1.34963	1.70124	4.14322	3.07332	3.75802	2.75963	2.5104	4.21388	4.84895	2.8913	2.5761	0
5.04617	1.93146	0.721489	1.64197	3.60203	2.22385	3.59103	4.92842	2.54119	2.26658	2.96165	2.23629	3.6791	0
4.79609	2.19559	0.862773	1.32255	3.89333	2.19059	3.74311	4.50079	2.84301	2.37248	3.20624	2.34699	3.5458	0
2.44732	1.81771	4.43839	1.21845	2.97825	2.09625	3.58005	4.36449	4.62541	2.80982	2.40806	3.7395	3.85459	0
5.24838	2.19309	1.47908	2.08767	3.85707	2.41656	3.74632	4.47518	2.89984	2.41556	3.16931	2.3626	3.92472	0
5.0894	1.56147	0.965908	1.56246	2.91993	2.37666	3.03057	4.37167	2.23863	2.14319	3.24055	1.96339	3.77666	0
4.32727	2.98477	0.943648	1.34333	4.69345	2.08382	4.30983	4.87354	3.3595	2.41656	2.5113	2.33751	2.87401	0
4.01138	1.98783	0.755923	1.18653	3.56162	1.79962	3.444	4.81612	2.53336	2.16396	2.13305	2.05519	2.87587	0
4.65872	2.98648	1.33611	1.49934	4.57927	2.24068	4.35987	4.52637	3.41116	2.74813	3.2708	2.88762	3.46548	0
5.38779	2.16909	1.00934	2.02811	3.83161	2.53391	3.8666	5.11045	2.74029	2.51497	3.65164	2.48141	4.11511	0
0.728968	0.718551	1.38406	0.699854	0.933016	1.27761	2.68319	4.42626	2.25598	2.38601	1.89573	2.379	1.84749	0
4.9279	1.28637	0.83879	1.64393	3.08803	2.08104	3.28399	4.21102	2.68772	2.15881	2.78278	2.37186	3.60404	0
4.02106	1.88205	0.645826	1.06283	3.4155	1.75681	3.31408	4.23935	2.64564	2.40445	3.23186	2.40509	2.80704	0
4.89226	1.84252	1.48148	1.7068	3.71765	2.19683	3.82125	4.79647	3.12566	2.49473	3.59193	2.70849	3.66872	0
5.39096	2.11123	1.35232	2.03625	3.89804	2.55075	3.85779	4.69934	3.01989	2.1445	2.47311	2.57861	3.98655	0
4.14605	1.05258	0.781262	1.07577	2.52144	1.84427	3.05644	5.52876	2.18965	2.25135	2.88577	1.89084	2.92975	0
5.04264	1.54772	0.939903	1.79211	3.22198	2.32859	3.56862	5.17236	2.96165	2.14319	2.71581	2.47588	3.82245	0
1.48582	0.520217	1.91346	0.855543	1.27984	2.24899	3.22818	4.52121	2.87463	3.08735	2.39012	2.78005	2.58858	0
1.75031	0.822186	2.38407	0.448299	2.07473	1.7511	2.2018	3.96519	2.86336	2.48915	1.23969	1.78255	1.9006	0
3.1995	3.38862	1.73061	1.72696	5.05869	3.30954	4.65073	2.01639	3.64358	4.39836	4.4243	3.34636	2.75372	0
4.84707	2.17546	1.75318	2.56102	3.87471	2.24425	3.76644	4.777	2.98647	2.08104	2.60172	2.30195	3.6605	0
4.28987	3.1518	0.830707	1.27439	4.74933	1.92014	4.25475	5.01833	3.36601	2.677	2.90105	2.39813	2.94147	0
3.14622	2.72989	1.67401	1.94886	4.33682	2.77312	3.95851	3.88841	2.83656	3.8751	4.75195	2.68472	2.45911	0
2.90048	1.85124	1.76245	0.21429	1.65564	3.94829	1.87528	0.818006	3.50146	4.22355	1.12501	3.00304	3.25728	0
3.70556	1.65525	1.37621	1.15675	3.1787	1.7719	3.27505	4.63535	2.65574	2.05994	2.88392	2.23278	2.8526	0
0.48151	0.459643	0.793777	0.50027	0.733085	0.762578	2.3242	1.28053	2.29093	1.14108	0.104941	1.92301	1.0022	0
4.17981	2.39013	0.987803	0.914957	3.99756	1.9771	3.62269	4.87423	2.6749	2.43938	2.81301	2.20544	2.79498	0
4.85956	2.25135	0.681856	1.70495	3.90337	2.3891	3.88887	4.89853	3.13435	2.64389	3.23752	2.71726	3.7276	0
1.16576	0.677878	2.01684	0.390283	1.41562	1.11451	1.65942	3.95265	2.40112	2.06419	0.901871	1.40475	0.890255	0
5.44324	1.39458	1.16341	1.74497	3.07888	2.43051	3.18558	4.66268	2.37697	1.99995	2.96621	2.12917	4.0123	0
2.54963	1.53379	1.46703	0.360788	1.42044	3.68939	1.9021	0.788412	3.15764	4.36852	0.846829	3.16419	2.94727	0
4.75242	1.73764	0.806189	1.22702	3.36188	2.05851	3.52489	4.86387	2.72596	2.25958	2.68997	2.52459	3.52388	0
4.43587	2.49659	1.42757	1.19239	4.02502	1.92339	3.8426	4.08968	3.14201	2.28843	3.00851	2.31502	3.34636	0
1.56458	0.668704	2.07999	1.14463	0.749446	2.53926	1.34866	3.06069	1.78436	3.62087	1.02351	2.33007	2.33645	0
2.54142	1.16708	1.56439	0.285762	0.83261	3.58885	1.35416	1.65316	1.59716	4.1777	4.991	2.78141	2.92383	0
5.1943	1.48605	0.627529	1.55822	3.03439	2.13662	3.13718	4.46442	2.41789	1.64053	2.00812	1.89573	3.76954	0
2.76465	2.64709	1.87935	0.695652	4.24137	3.35797	3.88166	3.12582	3.20624	4.53516	5.62578	3.3721	2.73243	0
5.03472	0.875469	0.469494	1.38378	2.48375	2.00895	2.42056	4.60317	1.47668	1.65525	2.11479	1.44501	3.66078	0
5.39947	1.92824	1.43508	1.89143	3.69332	2.43544	3.35915	4.83151	2.48325	2.2018	3.25259	1.85934	3.96139	0
2.51469	2.0149	4.86504	1.55822	3.10843	2.11932	3.81078	4.33092	4.91457	2.67933	2.67642	4.02543	4.27639	0
4.87833	1.61698	0.703992	1.25789	3.28889	2.15622	3.13521	4.47247	2.22335	2.122	2.52899	2.02978	3.6334	0
1.92957	0.58873	1.61425	0.229708	0.300905	3.05537	1.2419	3.00457	1.59931	4.29526	4.7078	2.84749	2.46099	0
3.06231	1.92339	1.46217	0.325995	1.46983	4.00932	1.08736	2.16267	3.06467	3.80625	4.34987	2.59845	3.23882	0
1.66145	0.520217	1.79336	0.16255	0.670218	3.08941	1.51494	3.09762	1.88921	4.11293	4.00386	2.78822	2.24676	0
2.57945	1.13449	1.07528	0.345926	0.777675	3.77971	1.17988	0.631513	1.79336	4.05788	2.85831	2.6596	3.12517	0
2.67989	2.70756	1.551	2.61915	4.42723	3.1776	3.96433	2.0223	2.97075	4.12326	4.21816	3.01394	2.6749	0
2.22361	0.185927	1.20672	1.39859	1.06283	1.62988	3.13669	3.0511	2.63147	2.40951	2.53598	2.62512	2.31827	0
2.25249	1.91034	1.61425	1.59784	3.66381	2.9916	3.18465	1.02766	2.39213	4.08206	5.08219	2.8077	2.29314	0
4.23009	0.883493	2.55581	0.781666	1.91903	4.36492	2.85046	4.16986	3.3774	3.20688	1.40986	3.5294	6.20818	0
5.19943	1.28053	0.604392	1.78697	2.93231	2.2941	3.0575	4.71276	2.3871	2.02082	2.92798	1.95575	3.92406	0
4.45319	1.7775	0.654904	1.66914	3.4217	2.10717	3.57878	4.55657	2.84236	2.16909	3.21337	2.34804	3.21337	0
2.17042	1.59952	1.00578	0.95084	2.92049	3.10677	2.65187	2.14581	1.76613	4.20225	3.93298	2.76211	2.16988	0
5.01659	1.97402	1.15709	1.42044	3.68093	1.99239	3.72415	4.61972	3.03804	2.13265	2.82682	2.37391	3.57473	0
5.22179	1.57054	1.13472	2.06162	3.19692	2.44036	3.36347	4.76103	2.62432	2.12467	2.79363	2.05937	3.96476	0
4.68425	1.84427	0.901871	1.1747	3.46705	2.122	3.41316	4.45392	2.77936	2.11663	3.04227	2.30085	3.31914	0
3.8944	1.96938	0.901871	0.957905	3.62277	1.8195	3.70539	4.87795	2.53424	2.30535	2.93621	2.31502	2.83785	0
3.95833	1.80326	0.894138	1.15373	3.53067	1.72598	3.47287	4.26754	2.82486	2.26541	3.13291	2.19939	2.73815	0
4.6892	2.29862	0.331432	1.10754	3.80548	2.12734	3.57403	4.34307	2.7209	2.40749	2.53685	2.01973	3.17579	0
3.3494	3.3705	1.8005	2.79973	5.07864	3.50263	4.62862	1.91362	3.46202	4.58031	5.16297	3.4064	2.99755	0
2.49934	2.39527	0.699588	1.63606	3.93184	2.27468	3.61966	2.31316	2.58527	3.45836	3.23578	2.41397	2.17858	0
2.72419	2.66922	1.85934	2.25577	4.33641	3.10576	3.95025	2.82467	2.82224	4.24473	4.48451	2.97583	2.53772	0
4.9955	2.43839	1.41241	1.63606	4.22163	2.771	4.04942	5.24235	2.98647	2.99782	3.24573	2.71362	3.70473	0
0.390283	0.583915	1.58635	1.20114	0.457837	1.08048	1.83725	4.00148	1.84408	1.59069	1.85597	1.28321	0.499147	0
4.63947	2.17546	1.03053	1.90379	3.83252	2.10988	3.83456	4.91604	2.86525	2.27468	3.35873	2.60091	3.24012	0
0.578178	0.485084	1.5028	0.15735	1.13852	1.10101	1.61481	3.34448	2.59188	1.91525	0.547674	1.23969	1.08538	0
2.0376	1.74343	1.68597	2.07993	3.19391	2.84326	2.86923	2.08798	2.0369	3.88678	4.04227	2.65652	2.46286	0
1.73059	1.0059	3.29198	0.712395	1.88364	1.24491	2.31538	3.48405	3.5394	1.95689	1.49337	2.70849	2.6989	0
0.682983	0.180354	1.40986	1.95033	1.23269	1.17669	2.76675	5.06492	2.26056	2.21655	0.806189	2.21264	1.91983	0
2.30688	2.63017	3.11051	3.57439	2.60299	3.54927	2.29862	1.53145	2.84493	4.62396	5.14887	3.34402	2.83332	0
4.32546	2.79267	1.10865	1.1747	4.46416	2.3209	3.96239	4.71408	2.91311	2.99839	3.7807	2.3626	2.87649	0
2.88828	1.46884	0.547674	0.48151	2.93956	1.42333	2.71506	4.68238	2.12917	2.09074	3.13242	1.75875	1.97249	0
0.999524	0.474942	2.06352	0.178123	1.18063	0.696078	1.53145	3.24243	2.26738	1.47871	0.538059	1.33065	1.59069	0
4.94716	2.59208	1.36565	1.7396	4.15666	2.27814	4.07938	4.98347	3.31994	2.59797	3.27164	2.61066	3.64819	0
3.58758	2.72473	1.13149	0.866875	4.40329	1.94901	4.12436	4.92981	3.13194	2.59377	2.95822	2.45062	2.74738	0
3.93761	1.96627	0.479422	0.889271	3.50665	1.63415	3.61265	4.7358	2.6155	2.22264	2.18474	2.08135	2.79498	0
4.52074	2.46073	0.0718714	1.19239	3.99504	2.0223	3.73069	4.22554	2.71216	2.46648	2.85132	2.12266	3.21337	0
2.59442	1.65316	4.40056	1.34075	2.82619	2.0149	3.432	3.77427	4.33011	2.22142	2.27529	3.49141	3.65107	0
4.21169	2.61873	0.909562	0.881845	4.17997	1.79597	3.91835	4.5543	3.00578	2.28843	3.24098	2.43246	2.94495	0
3.63701	2.24425	0.901871	0.817119	3.82886	1.47378	3.78255	4.68469	2.79025	2.10581	2.90529	2.07316	2.24445	0
2.67412	2.72989	0.951109	1.72696	4.32435	3.13521	3.93841	0.907296	2.88269	4.33137	4.02858	3.09012	2.56007	0
3.87951	1.55002	0.681856	0.6444	3.18612	1.62774	2.99557	4.12106	2.37186	2.0485	2.10554	1.93716	2.47311	0
5.48879	2.30199	0.909562	1.76618	4.05741	2.68396	3.87909	4.15326	2.88022	2.25958	2.25023	2.20544	4.09228	0
1.20114	0.174776	1.85259	0.380486	1.15976	1.24792	1.77002	3.31737	2.59681	1.76627	0.508942	1.20976	1.2602	0
5.07851	1.81231	1.15709	1.88832	3.07014	2.18179	3.62691	4.99781	2.6596	2.03984	3.05014	2.54292	3.7616	0
4.24137	2.25489	0.924816	1.49035	3.86283	1.67183	3.85347	4.51998	3.07646	2.18934	2.70481	2.56262	3.2829	0
2.41047	0.80961	0.772862	0.300905	0.532711	3.56478	1.92339	0.731887	1.74571	4.33182	0.479422	3.10607	2.54896	0
2.0403	0.911224	2.6711	2.10678	1.53027	3.12284	2.42754	3.0728	2.86776	4.10922	1.61636	3.04121	2.88762	0
2.60686	2.66294	1.18526	1.63408	4.37995	2.87816	3.91992	3.26213	3.01989	3.92194	3.97603	2.73172	2.08407	0
1.5127	0.731887	2.98647	0.486215	1.44423	1.28345	2.15622	3.61571	3.17394	2.29297	1.2775	2.19575	2.19697	0
2.30999	1.41296	3.84328	0.904007	2.47937	1.65733	2.98248	4.04586	4.20157	2.54987	2.1761	3.08052	3.12711	0
4.04513	1.95059	0.686307	0.809313	3.54899	1.7415	3.39889	4.38997	2.53074	2.19059	2.53074	2.0538	2.79161	0
4.75687	1.50539	0.235744	1.10754	3.02728	2.00446	3.24463	3.81702	2.81036	2.07685	2.34489	2.14845	3.50645	0
3.98589	1.92339	0.547674	0.781666	3.43603	1.70624	3.30664	4.1674	2.42082	1.9021	2.27529	2.06491	2.59681	0
1.06607	0.622092	0.806189	0.947294	0.900337	1.8087	2.85568	3.16812	2.13305	2.74741	2.68922	2.37493	2.18965	0
2.96045	2.18431	2.28982	0.280699	1.93256	4.12326	2.27006	1.22363	3.78045	4.38715	0.842815	3.16745	3.43103	0
4.83207	1.81771	0.901871	1.52371	3.60576	2.18557	3.60867	4.87804	2.6937	2.26308	2.44111	2.49601	3.56507	0
3.92708	2.49194	0.663935	0.863108	4.08878	1.5728	3.94413	4.4989	2.81102	2.18431	2.98814	2.27529	2.75091	0
5.06463	2.53212	1.00578	2.04165	4.22379	2.35983	4.0052	5.04977	2.96336	2.36933	3.04542	2.53685	3.56539	0
4.17124	2.5595	0.494232	0.904007	4.24801	1.84776	3.80676	4.97489	2.76002	2.18053	2.94088	1.83723	2.92502	0
4.58799	1.753	0.802063	1.18063	3.43603	1.84427	3.32513	4.44983	2.50413	2.16781	2.93679	2.30195	3.42924	0
4.94304	1.35141	0.93238	1.5259	3.0232	2.01639	3.11283	4.86658	2.60904	1.9054	2.99534	1.9006	3.56944	0
2.49675	1.22363	1.84919	0.146937	0.757564	3.66301	1.51256	2.46073	1.81113	4.26117	4.42959	2.91789	2.92146	0
2.64924	1.53612	1.0129	0.270554	1.39367	3.87416	1.55462	0.907296	2.78958	4.45089	0.806189	3.13531	3.14106	0
2.94344	0.24682	1.0129	1.89453	1.13239	1.86161	2.49937	2.21043	2.15607	2.83001	2.8057	2.34279	2.68697	0
4.63998	2.11393	0.50405	1.08219	3.69096	1.96938	3.66039	4.66011	2.71872	2.15233	3.10111	2.35743	3.32472	0
2.70334	2.94156	0.672919	1.19239	4.51107	2.97269	4.02766	2.27584	3.04227	4.05198	4.13549	2.78073	2.58527	0
4.46015	1.77936	1.23969	1.78181	3.45049	1.69824	3.36033	4.24148	2.59435	1.96938	2.90649	2.06629	3.15245	0
3.36697	2.63503	0.905722	1.21271	4.32824	2.68165	3.85515	3.45515	2.77799	3.63262	3.5242	2.50413	2.47681	0
5.14039	2.07265	1.08538	1.94	3.71149	2.3373	3.89096	4.60328	3.03114	2.3231	3.2891	2.68772	3.82197	0
2.80546	1.35416	0.878542	0.229708	1.03323	3.78462	1.29794	1.94107	1.34963	4.45313	2.35326	2.98312	3.02419	0
3.34236	3.01738	1.69583	2.11182	4.69219	3.35244	4.31847	4.26786	3.10359	4.33152	4.31336	3.079	2.88084	0
4.86193	1.78493	0.850831	1.76793	3.45382	2.16653	3.33807	4.61524	2.73315	2.3253	3.34441	2.35222	3.67012	0
1.69377	1.49576	3.09962	1.33299	2.19157	1.28637	2.67234	3.47287	3.80291	2.28158	1.35232	2.79093	2.84236	0
1.26617	0.911224	1.8005	0.59607	1.69938	1.59952	2.63341	3.98455	3.4378	2.30087	0.703992	2.49601	1.90544	0
3.7575	1.753	0.604392	0.657357	3.18263	1.56602	3.05057	4.33717	2.31827	2.12066	2.42956	1.95881	2.57527	0
0.49091	0.714081	1.83551	0.992678	0.622592	1.26286	1.07009	2.25489	1.48863	2.47882	0.781262	1.8076	1.53516	0
1.68625	1.35141	2.59023	0.665942	1.7904	1.93628	2.53748	4.29835	3.67153	2.80914	1.0129	2.54638	2.26284	0
4.23086	1.2419	0.703992	1.20114	2.83793	1.62774	2.90759	4.4989	2.46193	1.65525	2.48049	1.96643	3.03007	0
4.79965	2.05566	1.39445	1.22986	3.75578	2.24662	3.94763	4.59037	3.11787	2.44719	3.1986	2.9077	3.64097	0
2.63956	2.55776	1.23673	2.10678	4.13668	3.27505	3.83137	3.02674	2.68697	4.32059	4.39265	3.01231	2.5104	0
5.37284	2.0935	1.34963	2.05633	3.79109	2.62037	3.68485	5.00528	2.98368	2.19808	3.12177	2.40311	4.04013	0
2.90681	2.94097	1.88593	0.999524	4.60024	3.43382	4.09347	2.05137	3.11738	4.50356	5.73272	3.32671	2.94727	0
1.14463	0.784136	1.9006	1.75563	1.32517	1.85989	3.20504	4.76674	2.77112	2.81524	0.951109	2.6275	2.16863	0
1.94886	0.749498	2.90468	1.81741	1.24396	2.84128	2.32749	2.81321	3.23186	3.75245	1.37883	2.97244	2.73172	0
3.23406	0.392201	0.991417	1.41562	0.757564	1.61914	2.86923	3.33888	2.30414	2.45205	2.35013	2.46099	2.45157	0
3.67641	1.99391	0.677393	0.797526	3.57704	1.68613	3.41278	4.74884	2.5861	2.51406	3.2611	2.20423	2.47218	0
4.91454	1.94584	1.17282	1.55184	3.63784	2.21411	3.84236	4.74923	2.9403	2.23949	3.19544	2.5677	3.76289	0
2.20771	2.13397	1.70171	1.26617	3.62558	3.02069	3.13127	1.88373	2.24445	4.07804	5.13071	2.93445	2.28982	0
3.43603	2.58955	1.90705	2.65146	4.18688	3.33606	3.94127	4.60691	3.00959	4.44039	5.10251	3.07544	2.85578	0
5.17286	1.19569	0.650371	1.47671	2.83609	2.32749	3.1098	4.36276	2.31611	1.91198	2.96393	2.18228	3.75334	0
4.92239	2.76533	1.30298	1.93554	4.40856	2.25606	4.21956	4.49966	3.22705	2.51588	3.01935	2.42569	3.78398	0
5.28928	3.67053	2.01684	2.0376	5.29331	2.98876	4.92117	5.33942	4.03271	3.50604	4.06227	3.12469	4.07325	0
4.76498	1.47378	0.793777	1.22417	2.90451	2.08243	2.995	4.59747	2.29535	1.95689	2.12787	1.63315	3.44558	0
2.93511	1.84427	1.42506	0.350888	1.7324	3.97204	1.83725	1.20819	3.41843	4.30816	0.622925	2.93034	3.11738	0
4.54004	2.35876	1.01644	1.76967	4.03438	1.92339	3.7823	4.99328	2.68171	2.46361	2.40806	2.03121	3.47271	0
1.4971	0.915141	3.18589	0.741287	2.06162	1.22363	2.98018	3.33526	3.4484	1.92501	1.38927	2.67186	2.72884	0
4.93822	1.7978	1.0129	1.82737	3.42547	1.99391	3.28187	4.25024	2.66575	2.00145	2.92205	2.15985	3.7161	0
1.33817	1.0384	2.85768	0.541888	1.88364	1.59952	2.47409	4.26643	3.64589	2.42754	1.18216	2.54379	2.45157	0
4.07277	2.44329	0.464514	0.809313	4.18688	1.78308	3.86755	4.52797	2.83268	2.24544	2.87649	2.14973	2.87712	0
4.60467	2.00895	0.965908	1.37129	3.65867	1.98325	3.66967	4.21455	2.89313	2.2907	2.98256	2.47681	3.25302	0
3.44446	2.74741	1.47187	1.30139	4.42987	3.22907	3.97545	4.41055	3.03114	4.38376	4.82072	3.10706	2.93092	0
4.6823	1.92177	0.947384	1.10125	3.57173	2.11663	3.52922	4.7931	2.80303	2.16781	2.79565	2.2269	3.31713	0
0.769662	0.775549	1.70171	1.00973	0.678739	1.44378	0.381666	2.32968	1.15392	2.24662	0.901871	1.42506	1.52371	0
4.24545	2.42156	0.523552	1.05631	3.97191	1.8087	3.7946	4.41014	2.80036	2.14188	2.48233	2.06904	3.00414	0
5.09187	1.39193	0.810303	1.43951	3.06917	2.18053	3.18042	4.47053	2.55581	1.92177	2.70849	2.06075	3.90842	0
0.918588	0.771237	1.91506	1.15976	0.453073	1.73183	0.771237	2.62935	0.943648	2.55075	0.781262	1.74196	1.62269	0
4.21558	1.98325	0.580963	0.840295	3.4654	1.81231	3.72415	4.12252	3.06364	2.29862	3.14058	2.53859	3.16185	0
4.77747	2.99557	2.14335	1.69751	4.64474	2.61543	4.43918	5.29584	3.90374	3.16239	3.90218	3.08255	3.75308	0
4.68561	1.25989	0.738799	1.58548	2.69558	2.17926	2.92956	4.55204	2.13821	1.96627	3.08204	1.91506	3.5124	0
4.94191	2.67	1.66999	2.08638	4.33157	2.25371	4.08263	4.69738	3.07442	2.62283	3.00085	2.25023	3.41662	0
5.51403	1.79962	1.00578	1.75563	3.48559	2.6653	3.49888	4.77586	2.59353	2.0866	3.01557	2.44111	4.16822	0
4.42496	1.95059	0.995021	1.06283	3.47685	2.06419	3.61784	4.38065	2.75302	2.33186	2.98256	2.55325	3.26828	0
1.43002	0.464754	1.07528	1.53462	1.15373	1.92501	2.93077	3.0858	2.32793	2.81457	2.97244	2.57443	2.54638	0
4.61265	2.93137	1.17594	1.34846	4.49943	2.21043	4.31681	4.5348	3.38041	2.69925	3.13387	2.7725	3.44558	0
4.69807	2.14188	1.0129	1.4132	3.76265	2.17546	3.80701	4.72841	2.71143	2.42754	3.11444	2.49782	3.49611	0
4.62594	1.40512	1.06167	1.35102	3.00359	2.10036	3.34807	4.07842	2.75442	2.30871	2.48141	2.58028	3.561	0
4.24303	2.48634	0.613682	1.39367	4.1923	1.86847	3.9598	4.52121	3.09413	2.30759	2.85831	2.51308	3.15622	0
4.82685	2.77453	1.31413	1.97069	4.38561	2.31093	4.30785	5.00619	3.41516	2.38082	3.01935	2.84941	3.58429	0
1.58548	1.34313	2.97301	0.985795	2.23926	1.58178	2.83001	4.49777	3.90263	2.36512	1.355	2.67186	2.52811	0
2.31721	0.919047	1.21882	0.265471	0.661655	3.5182	1.13779	0.583915	1.3683	4.36665	4.54799	2.99202	2.86901	0
4.26547	1.95532	0.663935	0.885563	3.50317	1.94743	3.56862	4.49676	2.70555	2.35876	2.69816	2.27754	3.0338	0
5.09999	2.06984	0.882457	1.59784	3.63033	2.30871	3.63561	4.60736	2.74384	2.29523	3.07186	2.44111	3.74213	0
4.17221	1.86504	0.962223	0.728968	3.56072	1.79962	3.56542	4.55299	2.75161	2.10853	2.3096	2.27978	2.99091	0
2.41609	2.3242	1.9356	2.67989	3.96634	3.21372	3.63022	2.31205	2.65652	4.29943	4.72709	2.94321	2.33751	0
4.53643	1.95217	0.528399	1.00293	3.45615	1.94426	3.47181	4.80021	2.71654	2.03403	2.4666	2.18597	3.36525	0
2.56666	0.883493	0.995021	0.260381	0.847939	3.65747	1.22055	0.942251	1.355	4.54158	4.04479	3.15951	2.92324	0
0.265471	0.180354	1.22182	0.400044	0.385389	1.02406	1.83901	2.98762	1.47428	1.45136	0.965908	1.41241	1.2775	0
5.08028	1.59732	0.721489	1.51049	3.25335	2.34271	3.34966	4.84658	2.75512	2.16653	3.15198	2.04679	3.91814	0
5.21007	1.64896	0.703992	1.57508	3.04745	2.26541	3.45228	4.63535	2.62432	2.11393	2.4315	2.49238	3.87592	0
1.60192	0.480019	1.14436	0.265471	0.564647	2.69545	1.27173	3.36582	1.27176	3.76329	3.86948	2.57191	2.18474	0
4.70885	1.49334	0.924816	1.1044	3.17211	2.178	3.14646	3.93819	2.35118	2.02082	3.03114	2.10554	3.47374	0
5.61932	1.64475	1.16341	1.87893	3.23985	2.72473	3.58603	4.47493	3.05066	2.34702	3.13675	2.31177	4.27962	0
4.53959	1.89546	0.951109	1.01311	3.54414	1.96315	3.5753	4.60283	2.51486	2.2018	2.83397	2.20664	3.47237	0
4.01652	1.17669	2.61308	1.45127	2.05633	4.23952	2.66922	3.21418	2.84429	4.31469	1.09208	3.60765	5.78242	0
3.82013	0.312235	0.810303	1.48355	1.00973	1.77936	2.93258	2.90944	2.51664	2.47693	2.68697	2.35326	2.90166	0
2.62144	2.62119	1.67601	0.661655	4.23803	2.97904	3.83749	1.69221	2.92502	4.06548	5.12632	2.7635	2.53859	0
2.59832	2.47976	1.42001	1.03323	4.12976	3.14549	3.70623	2.91374	2.54982	4.19681	4.6493	3.05847	2.45062	0
4.37731	1.64264	0.604392	0.896658	3.27864	2.07965	3.33243	4.31166	2.82289	2.5525	3.16419	2.52899	3.29526	0
3.79678	1.84602	0.636701	0.537305	3.32245	1.3292	3.21236	4.21538	2.33432	2.00446	2.9149	2.05659	2.46005	0
4.19389	2.34163	1.33882	1.66722	4.03083	1.98783	3.93841	4.98223	3.21248	2.59713	3.36525	2.8665	3.2611	0
4.08063	1.74919	0.627529	1.53027	3.40297	1.6061	3.58759	5.16124	2.59845	1.95375	2.47681	2.45629	2.88639	0
2.92049	1.92663	1.55994	0.280699	1.3612	4.10661	1.49334	3.01183	2.90347	4.09856	4.33229	2.70629	3.21736	0
4.76228	2.12734	1.03403	1.23552	3.67934	2.02964	3.44364	4.81446	2.54032	1.96782	2.45252	2.03121	3.53522	0
0.881845	0.459643	1.24852	1.24115	0.907666	1.76438	2.69163	3.04628	2.30633	2.83533	1.06167	2.38609	2.34699	0
4.70695	1.78308	0.980544	1.50827	3.44379	2.08382	3.35046	5.02088	2.63464	2.18431	3.23535	2.02117	3.31753	0
4.51465	2.06843	0.595056	1.15976	3.69227	1.83725	3.77062	4.88251	2.99975	2.13265	2.53859	2.2398	3.45401	0
4.5511	1.55919	0.459523	1.01311	2.92783	1.98325	3.28017	4.31515	2.42666	2.01935	2.88946	2.27754	3.24228	0
1.62812	0.428743	1.49337	0.178123	0.622592	2.9967	1.07009	3.09762	0.984178	4.06315	2.8796	2.56854	2.51664	0
4.89974	1.47131	0.459523	1.25789	3.25741	2.18431	3.20596	4.57775	2.68246	1.9771	2.87026	2.08407	3.59891	0
4.40509	1.37589	0.388549	0.87438	2.97235	1.79962	3.11383	4.54231	2.20544	2.26658	3.06879	2.06491	3.15481	0
0.87438	0.903357	1.73061	0.340955	1.36626	1.0561	1.79597	3.66271	3.1401	1.91034	0.56201	1.30298	1.16655	0
4.55343	1.46387	1.13472	1.08538	3.1588	1.96938	3.17665	4.11903	2.34909	2.02671	2.99202	1.8199	3.2004	0
4.72496	2.13793	1.10865	1.47671	3.70037	2.22869	3.78924	4.92043	3.12469	2.3777	2.815	2.51752	3.55469	0
4.50991	2.19434	0.725834	1.09175	3.77335	1.83901	3.77531	4.24846	2.95535	1.96938	2.39313	2.20423	3.22178	0
4.46489	2.0866	0.764416	1.19532	3.60633	1.92663	3.51551	4.22802	2.93738	1.90044	2.26625	2.43727	3.07084	0
4.75442	2.54987	0.622925	1.8023	4.17561	2.1353	4.02947	4.58356	3.00414	2.28615	2.91729	2.29756	3.40714	0
2.50789	2.3209	0.998616	0.904007	3.97961	3.08684	3.5734	2.60965	2.51752	4.1737	4.36222	2.91011	2.74171	0
5.03115	2.33947	0.93238	1.57925	3.97942	2.45398	3.74552	5.20461	2.82877	2.45495	3.03645	2.36673	3.70528	0
5.01464	2.56298	0.699588	1.50827	4.33517	2.40038	3.98582	4.86545	2.98256	2.46265	3.01881	2.28982	3.64618	0
2.88711	1.70624	1.34694	0.131289	1.00973	4.07111	1.51968	0.65948	1.68992	4.49093	4.7084	3.1986	3.2031	0
4.37942	2.38394	0.36791	1.09493	3.98296	1.82664	3.70595	4.42748	2.68922	2.28729	3.13531	2.11479	3.12711	0
4.63221	1.85816	0.878542	1.43951	3.38281	2.20427	3.57562	4.88096	2.8968	2.40546	3.37928	2.55068	3.48261	0
2.93007	3.07594	1.00934	1.06931	4.60804	3.31572	4.23674	2.25253	3.28165	4.40697	4.61724	3.21913	2.67793	0
5.12811	2.24306	0.730168	1.68814	3.8584	2.2323	4.0171	4.95225	3.10903	2.30647	3.08002	2.81169	3.92799	0
3.93226	1.94267	0.695173	0.907666	3.66488	1.66357	3.70567	4.70016	2.63543	2.16909	2.42763	2.23629	2.84365	0
2.94621	1.89379	5.00823	1.86627	3.19563	2.34702	3.75431	4.26865	4.83163	3.32187	3.6568	3.78448	3.74422	0
0.305938	0.510237	1.08202	0.10514	1.01649	0.32302	1.0942	1.45889	1.41241	0.911224	1.17282	0.882457	0.48437	0
1.20114	0.705104	2.23161	0.50027	1.71418	1.28053	2.08104	4.06003	2.77112	2.23829	1.09208	1.74384	1.14436	0
4.47069	1.83019	1.04447	1.34846	3.40682	1.92663	3.48578	4.40558	2.69668	2.01044	2.86462	2.1548	3.12953	0
2.56182	2.19808	1.72106	0.64873	3.78202	3.09762	3.37477	1.60391	2.53946	4.16828	5.34824	2.83203	2.33962	0
5.53984	1.39986	1.03403	2.02265	3.09186	2.64067	3.27033	4.44172	2.58194	2.10172	2.57359	2.31394	4.1798	0
4.31973	2.06419	0.951109	1.33558	3.53282	1.68207	3.61935	4.66972	2.8037	2.09762	2.68697	2.14718	3.15811	0
4.18752	2.18683	0.810303	1.16276	3.83115	1.84252	3.6908	4.09705	2.83397	2.21288	2.65574	2.44588	2.93738	0
4.76453	1.62988	0.725834	1.4132	3.21101	2.26425	3.52822	4.46311	2.62032	2.15363	3.10161	2.46193	3.5081	0
2.52981	1.66357	1.40475	0.0946586	1.67106	3.65951	1.98783	0.554769	3.46996	4.08244	0.373085	2.91191	2.80237	0
0.365726	0.709599	1.24852	0.670218	1.21271	0.677878	1.7511	2.61461	2.77387	1.332	0.743098	1.68199	1.5306	0
4.61724	1.2419	0.936147	1.12622	2.94565	1.76815	2.97385	4.28922	2.30524	1.82307	3.26025	1.86438	3.256	0
2.65294	2.65505	1.65988	0.653049	4.3814	3.14012	3.9179	1.1735	3.04647	4.23854	5.29456	3.0391	2.66805	0
5.40758	2.21288	0.962223	1.79722	3.82474	2.47219	3.61021	4.91188	2.52986	2.23829	2.78822	1.68597	4.14693	0
3.00255	2.70982	1.66191	2.05898	4.36867	2.92168	3.95743	4.23477	2.98424	3.99399	4.05251	2.7209	2.56177	0
4.6359	1.88036	1.11522	1.26617	3.54748	1.98478	3.62269	4.88139	2.84365	2.04129	2.56854	2.48049	3.46893	0
2.16089	1.30655	3.83853	0.943739	2.45273	1.54541	3.02234	3.74552	4.09062	2.16524	2.03121	3.06364	3.42816	0
4.64211	1.39986	0.785445	1.3459	3.01859	1.94901	3.05324	4.35143	2.27417	2.04274	2.87276	1.87438	3.33382	0
1.49035	0.645552	1.08873	1.17173	0.940174	2.08936	2.74378	3.66707	2.24792	3.04143	1.55771	2.51664	2.80903	0
0.781666	0.0736002	1.041	0.933016	1.12622	1.6061	2.64868	4.33375	2.11347	2.4085	0.712764	2.17113	2.19331	0
3.9808	2.47788	0.777068	0.885563	4.15518	1.83549	4.05885	4.65008	3.12905	2.53659	2.86587	2.53074	3.09663	0
5.08895	2.10309	0.734489	1.46522	3.77528	2.37143	3.7859	4.34865	2.91371	2.20056	2.61711	2.60172	3.80881	0
2.58657	1.753	1.25729	0.325995	1.76091	3.81303	1.96471	1.96315	3.45401	4.41905	0.854823	3.07646	2.85387	0
2.76002	2.62364	1.23969	1.18063	4.22917	3.19767	3.89327	2.40038	2.8385	4.32374	3.9845	2.95363	2.64876	0
5.26164	2.26075	1.33338	1.7068	3.93535	2.52313	3.85755	4.9019	2.91011	2.27122	3.38641	2.19697	3.93363	0
4.23742	2.29523	0.699588	1.02656	4.04181	1.72988	3.81428	4.37823	2.86525	2.42555	3.00359	2.32686	3.07544	0
5.31431	1.70225	1.11522	2.18222	3.15925	2.47504	3.26039	4.72349	2.731	2.01639	2.9981	2.16488	3.90196	0
5.35384	1.65106	1.00578	1.89608	3.3457	2.54546	3.17712	4.38433	2.14335	1.83725	2.57443	2.12004	3.92994	0
2.17279	2.44622	2.49329	3.3706	2.39915	3.26516	2.08243	1.7978	2.34279	4.32254	3.83734	2.94205	2.72884	0
5.12014	1.40774	0.886362	1.83559	2.97128	2.15363	3.39813	4.71875	2.8796	2.13132	3.0871	2.50772	3.80611	0
4.84475	2.09487	0.717132	1.36878	3.84813	2.16139	3.75112	4.81097	2.84493	2.33838	2.83008	2.43343	3.55627	0
4.62975	2.65346	0.585672	1.24115	4.44246	2.28843	4.0963	4.33464	3.31954	2.55163	2.6155	2.56092	3.48023	0
3.34866	2.28843	0.951109	0.720703	3.81967	1.70823	3.77088	4.57297	3.05587	2.48728	3.22046	2.55667	2.65806	0
1.39121	1.62774	2.39913	0.541888	2.2514	1.74727	2.44231	4.3542	4.00022	2.7053	1.61213	2.24676	1.92775	0
2.85982	2.36617	1.06849	1.44658	4.04587	2.84588	3.71482	3.12582	2.53424	3.86304	4.51536	2.70334	1.92142	0
4.55753	1.30369	1.07528	1.22131	2.92614	2.13662	2.71804	4.33879	2.10421	2.12467	2.97244	1.87106	3.22924	0
4.84988	2.14057	0.444485	1.3459	3.7719	2.18557	3.89327	5.20703	3.07442	2.39732	3.25898	2.64954	3.62164	0
4.06737	2.87434	1.041	1.11067	4.50782	2.24306	4.28111	5.04788	3.29975	2.81794	3.09762	2.7725	3.07033	0
4.64717	2.01787	1.50045	2.04299	3.8497	2.12467	3.84454	4.88328	3.1707	2.23829	2.35535	2.78346	3.41225	0
4.94424	2.61047	1.03053	1.67488	4.1532	2.21043	4.07535	4.96054	3.16326	2.33622	3.23143	2.43439	3.51339	0
1.1044	0.80961	1.73441	0.59607	1.68247	1.48116	2.12467	4.39739	2.86713	2.3513	1.07528	1.55994	1.5306	0
5.09297	1.8195	1.20368	1.6498	3.40647	2.28957	3.21645	4.70088	2.19331	2.05709	2.61389	1.55324	3.83256	0
3.49458	2.7173	0.954824	1.48127	4.35808	3.50297	4.0171	4.84667	2.93738	4.62095	4.07005	3.27874	3.05014	0
3.61402	3.0925	1.17906	1.22417	4.68249	1.84252	4.44359	5.00292	3.42601	2.81862	3.13098	2.67945	2.7353	0
5.1455	1.85816	1.4524	2.4446	3.48495	2.3264	3.638	4.76084	2.79296	2.20056	3.13483	2.26738	3.79024	0
1.93405	1.46636	4.14079	1.1044	2.53148	2.19808	3.13472	4.20089	4.47169	2.82801	2.0538	3.42744	3.57504	0
4.62532	1.86847	0.57151	1.28256	3.5142	2.15363	3.52189	4.55024	2.71581	2.57678	3.22618	2.32686	3.26448	0
4.84971	2.31205	0.538059	1.57299	3.88558	2.30423	3.74872	5.23356	2.80903	2.36194	3.28786	2.41887	3.56601	0
3.06525	1.78493	1.20672	0.315982	0.914957	4.19902	1.24491	2.05566	1.59931	4.39473	2.59435	2.92916	3.39535	0
4.96518	2.19559	1.2602	1.94739	3.87624	2.35876	3.87627	4.78858	2.98032	2.38704	2.89801	2.52547	3.64733	0
4.05977	2.15233	0.585672	0.761607	3.6395	1.58401	3.61753	4.51043	2.76766	2.2907	3.11689	2.21264	2.98088	0
5.24417	2.06277	1.01644	2.35357	3.68859	2.49659	3.70372	4.67575	2.87213	2.33404	3.0449	2.48965	3.93774	0
4.76462	1.35141	0.326185	1.18946	3.13118	1.94267	3.16239	4.71245	2.24792	1.85644	2.53772	1.8164	3.60464	0
3.85261	1.5773	0.806189	1.03655	2.98039	1.62345	2.94454	4.35972	2.15733	2.30311	3.14153	1.92142	2.71581	0
0.541888	0.474942	2.02978	0.325995	1.00633	1.37858	1.68613	3.00345	2.93386	2.04129	1.05482	1.33065	1.65377	0
2.20771	2.05851	0.894138	0.569168	3.70943	2.89954	3.25035	2.5595	2.3215	3.90338	3.0881	2.44397	2.1761	0
4.56315	0.464754	1.12826	1.7324	1.13546	2.122	2.178	5.01171	1.66999	2.27468	2.76211	1.70561	3.17394	0
3.93122	2.55163	0.331432	1.24115	4.19881	1.77002	3.9919	4.04049	2.96678	2.30311	2.8974	2.3657	2.76766	0
4.89597	0.919047	0.703992	1.26066	2.20886	2.27353	2.82801	4.87397	2.39012	2.28843	3.00796	1.97701	3.54453	0
4.27577	2.11393	0.9769	1.52152	3.80572	1.97864	3.75139	4.55918	2.83527	2.37874	2.86147	2.44111	2.99202	0
2.56827	2.50306	1.37883	1.53027	4.18784	2.95872	3.61601	3.145	2.46005	4.02786	4.55813	2.78482	2.29093	0
0.541888	0.312235	0.449509	0.49091	0.224574	1.01683	0.784136	3.5388	1.39961	1.77377	1.94028	0.650371	0.489307	0
5.04712	1.11115	0.814407	1.32778	2.82619	2.43938	3.46334	4.68532	2.56516	2.27584	2.81566	2.57861	3.84233	0
4.11112	2.46743	0.414127	0.975405	4.0131	1.62988	4.00003	4.40586	2.98479	2.20797	3.0338	2.34699	2.74667	0
1.97643	1.19254	2.8913	0.844122	2.25468	1.68207	2.33295	3.89119	3.51635	2.53212	1.56882	2.47681	2.57191	0
4.97235	2.00745	0.854823	1.25234	3.44379	2.28615	3.60806	4.49246	2.68847	2.42555	3.12856	2.40806	3.62253	0
1.08857	0.360476	2.27754	3.23199	1.74497	1.94743	2.57934	4.97865	2.29314	2.78504	2.7628	2.11347	1.83206	0
1.57508	0.520217	0.87068	1.24396	1.08219	1.48605	2.54899	4.8832	1.98897	2.61047	2.95822	2.21622	1.90705	0
5.14052	2.1601	1.16341	1.80736	3.93802	2.47409	3.83186	4.62396	3.05483	2.29523	3.18269	2.46286	3.74318	0
5.27466	2.27122	0.604392	1.8224	3.85573	2.39834	3.64749	5.00718	2.83203	2.21777	3.17625	2.27417	4.00929	0
4.78568	1.51256	0.854823	1.18653	3.21016	2.25135	3.41465	4.78999	2.61389	2.49566	3.50843	2.44588	3.44453	0
4.65392	1.75871	0.913391	1.24115	3.46442	2.04562	3.78872	4.25008	2.89984	2.00296	2.34489	2.5761	3.46893	0
4.4538	2.37457	0.686307	1.05957	3.94191	1.90705	3.86089	4.62884	3.20713	2.42952	2.95363	2.32365	3.24401	0
5.00296	2.41455	1.20672	1.847	3.91309	2.27353	3.94391	4.80002	3.0258	2.34055	3.35218	2.62112	3.75774	0
4.95958	2.10581	1.11194	1.30406	3.59685	2.16267	3.60283	4.89734	2.67945	2.29184	2.63779	1.94959	3.64733	0
4.61859	0.961289	1.08202	1.64197	2.5002	2.178	2.92593	4.54628	2.06629	2.0223	3.06725	1.99194	3.43531	0
4.80182	2.30759	0.924816	1.7342	3.85707	2.12066	3.73854	4.49853	2.84429	2.13	2.52723	2.38002	3.52518	0
3.11312	1.98171	1.49809	0.15735	1.43951	4.3336	1.05961	1.45387	1.91665	4.5464	4.78439	3.17993	3.59891	0
0.635709	0.428743	1.5306	0.892969	0.320993	1.10778	0.598323	1.9863	0.777068	1.95689	0.721489	1.23673	1.38406	0
5.20673	1.56375	0.962223	1.57717	3.11312	2.49566	3.21917	4.45115	2.25713	2.06843	2.34804	2.02261	3.88823	0
5.28619	2.05423	1.11194	1.60803	3.74015	2.36512	3.52988	4.8987	2.61066	2.51497	2.99423	2.0369	4.0121	0
1.18358	0.339129	1.08873	0.773674	0.622592	2.24899	2.76959	3.01183	2.40013	3.19814	1.2158	2.61631	2.4218	0
5.39956	1.76815	0.91721	1.78181	3.34718	2.58531	3.49648	4.63809	2.43439	2.28501	3.16606	2.36054	4.00002	0
2.9539	1.85298	1.53971	0.255285	1.50604	4.02381	1.41556	3.51214	3.02419	4.08588	4.24928	2.74242	3.04909	0
5.5939	1.7978	1.41748	1.92205	3.4306	2.76248	3.63112	4.92981	2.79025	2.36933	3.52028	2.67566	4.2496	0
1.77489	1.5728	2.63543	0.355843	2.37613	2.33404	2.46457	4.9885	4.04441	3.31901	1.00578	2.379	2.412	0
4.80052	2.14188	1.22182	1.42284	3.82198	2.3577	3.67111	4.35479	2.55496	2.33622	3.2891	2.46005	3.57998	0
4.04402	2.02524	0.409032	1.01649	3.53804	1.78493	3.73096	4.49106	2.9645	2.38082	3.12128	2.36054	3.0449	0
3.22407	2.07265	1.21882	0.699854	3.56995	1.83549	3.60128	5.04131	2.61228	2.65266	3.00359	2.52195	2.19697	0
2.75736	1.48361	1.2775	0.555575	1.1747	3.88422	2.40749	1.64686	2.32042	4.32013	4.74879	3.20399	3.38229	0
4.74375	1.77564	0.708384	1.71968	3.45549	1.97247	3.57021	4.82607	2.77318	2.17673	2.16363	2.47218	3.59132	0
2.07603	0.423555	1.51214	1.82737	1.58341	1.75871	3.14598	2.363	2.92146	2.66922	2.69221	2.79093	2.52635	0
4.80216	1.65525	0.403926	1.21559	3.2456	2.07685	3.43382	4.75822	2.67186	2.14973	3.1836	2.38609	3.55184	0
3.4384	1.64053	0.789617	0.600517	3.29515	1.46387	3.17948	4.28439	2.38002	2.04129	2.75161	1.89735	2.53424	0
1.44423	1.03125	2.80437	0.724841	2.18222	1.49576	2.45302	3.88887	3.61094	2.37666	1.20976	2.52459	2.83527	0
2.729	0.135584	1.16969	1.82572	1.27166	1.7606	2.97789	2.51951	2.66575	2.52583	2.83203	2.731	2.93328	0
4.0886	1.13779	0.874616	0.982341	2.92501	1.69824	3.44291	3.99503	2.89375	2.07405	2.32257	2.33751	2.96791	0
3.98197	0.645552	2.70996	1.18653	1.76793	2.54899	1.8495	2.43839	2.27304	3.31655	0.703992	2.2186	3.04909	0
4.73361	1.753	0.730168	1.18946	3.31215	2.14581	3.63232	4.73061	2.65497	2.30647	2.55068	2.57861	3.42565	0
2.23815	1.36236	4.14955	1.16875	2.59364	1.93468	3.23131	3.61905	4.21277	2.40242	2.10421	3.52322	3.73106	0
5.10901	1.51018	1.42001	2.2448	3.15701	2.21166	3.6056	4.94372	2.80103	2.45881	2.66881	2.65652	3.83448	0
0.712395	0.530148	1.53971	0.964932	0.670218	1.12121	0.530148	2.00895	0.878542	2.2359	0.717132	1.51679	1.34154	0
2.729	2.93738	1.11194	0.978877	4.46113	3.13718	4.09422	2.53212	2.87089	4.11589	4.31883	2.82877	2.41397	0
4.81591	2.29523	0.980544	1.5259	3.94068	2.2018	3.86327	4.453	3.20713	2.26308	3.18772	2.42956	3.61749	0
3.99949	1.81231	1.31413	1.6498	3.52882	1.90044	3.70956	4.55406	2.95247	2.38186	3.33422	2.63779	3.10061	0
4.30974	1.59732	0.886362	1.39859	3.21144	1.96471	3.15711	4.50531	2.44302	2.178	3.13098	2.00227	2.92739	0
1.48355	0.957503	3.12905	0.50027	1.68247	1.15089	2.41052	3.2806	3.41734	1.7775	1.46703	2.36467	2.47218	0
4.34218	1.33758	0.882457	1.26617	2.81367	1.68207	3.00345	4.56886	2.24907	1.98478	2.68472	1.61425	3.17024	0
2.23815	0.365788	1.63938	0.188482	0.892969	3.09301	1.44125	1.2419	1.78074	4.31893	3.79969	2.97976	2.5113	0
4.372	1.78493	0.772862	1.06283	3.47457	1.7606	3.5985	3.9197	2.64172	2.03111	3.0693	2.22926	3.08356	0
5.10652	2.34055	0.576242	1.48808	4.04144	2.36406	3.84503	4.72056	2.96905	2.36617	2.81169	2.36157	3.88982	0
2.74597	2.88765	2.04257	2.67123	4.57668	3.00737	4.06042	2.90078	3.23143	4.05905	5.23063	2.99534	2.61711	0
1.4971	0.980062	2.35326	0.54646	1.62812	1.12454	2.12867	3.43236	3.40347	2.07405	1.3683	1.50748	1.75132	0
5.10153	1.47378	0.905722	1.7031	3.33039	2.4085	3.55447	4.61345	2.70334	2.08104	2.91371	2.42569	3.86578	0
5.29848	1.70425	1.06167	1.66914	3.47392	2.40546	3.69616	4.7791	2.85704	2.31538	2.82942	2.66422	3.97748	0
4.9024	1.31226	0.93238	1.23552	2.58341	2.2092	2.86987	4.97419	2.1395	1.86333	1.97249	1.79336	3.48972	0
4.84699	1.51968	0.962223	1.24115	3.34087	1.94743	3.28654	4.35041	2.27529	2.0223	2.69593	2.06629	3.35527	0
3.89032	2.60715	1.7268	1.95473	4.22917	3.5365	3.8666	5.16862	2.88145	4.65344	4.63577	3.34402	3.10359	0
2.48375	0.749498	1.50981	0.21429	0.414618	3.6857	1.25093	1.0059	1.70561	4.52367	3.93212	3.06158	2.99755	0
5.0597	2.126	0.936147	1.50158	3.67106	2.22021	3.95222	4.7254	3.02954	2.41956	3.39572	2.73887	3.80142	0
2.44188	2.37978	1.46461	0.49091	3.88817	2.98248	3.60098	2.25958	2.8017	4.06665	5.50152	2.8242	2.4315	0
4.94873	1.69623	0.882457	1.58341	3.17079	2.19559	3.28357	4.81923	2.6596	2.00745	2.85451	2.10421	3.68411	0
4.72645	1.52205	0.991417	1.30406	2.84345	2.02671	2.85046	4.72288	1.92142	2.11528	3.38342	2.12917	3.36716	0
4.4218	2.04562	0.434408	1.16276	3.7374	1.85989	3.84527	4.55728	2.97244	2.2311	2.84365	2.51575	3.41698	0
2.34059	1.15415	1.91346	1.04317	2.33454	1.54078	3.18511	3.8262	3.57535	2.5742	0.913391	2.93738	2.41495	0
2.5529	2.52943	1.46703	1.99066	3.98765	2.75246	3.57467	2.94929	2.81829	3.95287	3.91814	2.78278	2.08542	0
4.61651	3.25996	0.75166	1.59988	4.88742	2.39732	4.51503	4.92348	3.57998	2.81118	2.93504	2.71581	3.29403	0
1.77489	0.696078	1.51679	0.424288	1.08538	2.95813	1.58401	4.5348	1.58417	3.96562	4.18873	2.78141	2.38002	0
4.29735	2.31427	0.810303	1.31466	4.04881	1.77002	3.86494	4.73041	2.81698	2.17546	2.41593	2.38407	3.10607	0
4.07635	2.25841	1.25145	1.91752	3.85884	1.98935	3.89211	4.72891	3.2004	2.37457	2.78754	2.69816	2.98088	0
4.21745	1.85124	0.943648	1.606	3.28692	1.80326	3.44653	4.22405	2.84557	2.122	2.65342	2.2809	2.72162	0
5.08119	1.98935	0.613682	1.75031	3.55833	2.22264	3.50502	4.90308	2.33113	2.122	2.15985	1.8941	3.70473	0
4.31763	0.407925	1.29737	1.46059	1.24396	2.18053	3.00569	4.5698	2.43246	2.63664	3.09012	2.60661	3.15151	0
4.86249	2.33186	1.31135	1.64197	3.97032	2.38186	3.63202	4.91004	2.79228	2.39834	3.44981	2.14078	3.50279	0
4.09459	2.40343	0.717132	0.911316	4.0314	1.90869	3.84842	4.80002	2.88454	2.34379	2.486	2.14845	3.16699	0
5.48897	1.47378	1.47187	1.77662	2.96642	2.64308	3.70984	4.89743	3.02954	2.27006	3.35334	2.9149	4.17997	0
4.42256	2.15363	1.27176	1.65758	3.83161	2.126	3.75431	5.03211	2.81961	2.46839	3.78297	2.35639	3.22661	0
4.40625	2.24068	0.842815	1.33817	3.83684	1.92663	3.67312	4.70663	2.84685	2.28387	2.83656	2.43246	3.34128	0
4.25057	1.64053	1.08202	1.85507	3.36078	1.63415	3.37786	5.0893	2.45252	2.35451	3.05431	2.20181	3.29157	0
5.322	2.13793	1.11194	1.56879	3.85283	2.45977	3.64068	4.83674	2.73601	2.39834	3.24745	2.38002	4.06778	0
5.3747	1.65106	1.08202	2.0376	3.26427	2.52222	3.31243	4.63524	2.42956	2.31759	3.27373	1.974	4.12088	0
1.38874	0.381666	1.10865	1.38378	0.741287	2.22869	2.83068	2.87307	2.31827	2.87753	0.595056	2.51575	2.67869	0
2.94289	1.83372	1.74946	0.0368583	1.59988	4.00829	1.41556	2.36933	3.36525	4.11922	3.14535	2.77181	3.13387	0
5.2406	2.27584	0.747384	1.83231	3.90421	2.33513	3.806	4.98564	2.76904	2.22748	3.23317	2.412	3.85834	0
2.74125	1.28927	1.22781	0.141725	1.33817	3.80852	1.22669	0.987497	1.71529	4.34071	2.08542	3.0014	2.83721	0
1.04647	0.124346	1.37883	1.24676	0.600517	1.8495	2.63017	4.54844	2.36673	2.40749	2.42956	2.22926	2.08542	0
0.992678	0.626808	1.27176	1.55822	1.07898	1.75491	3.48924	4.77938	2.91848	2.54015	1.41495	2.8017	2.43631	0
2.68491	2.74668	1.66596	2.53397	4.44506	3.1017	3.95265	1.43616	3.10854	4.15522	4.344	3.09812	2.44588	0
2.62676	2.27353	1.363	0.486215	3.88406	3.42796	3.46652	2.06843	2.69296	4.49575	4.91668	3.18954	2.86336	0
3.31483	2.75174	1.59501	2.44913	4.40741	3.21826	3.9994	4.70735	2.9467	4.3005	4.46356	2.88885	2.83592	0
2.64105	1.18306	1.96947	0.224574	1.13852	3.72004	1.40249	2.47976	2.33007	4.19868	4.63222	3.03698	3.0306	0
3.85773	2.55601	0.747384	1.13239	4.14221	1.6615	3.94501	4.94622	3.00632	2.42952	3.04962	2.39813	2.71945	0
2.25686	2.178	1.04793	0.541888	3.76118	2.88639	3.35442	1.72793	2.51486	3.91066	4.3523	2.59517	2.19453	0
1.81407	0.579088	1.52371	0.712395	0.600517	3.02783	1.03483	1.0384	1.57542	4.13584	3.60884	2.81036	2.47865	0
4.95469	2.126	0.734489	1.68247	3.74539	2.33295	3.6469	4.95975	2.77593	2.2359	3.08103	2.329	3.63486	0
5.11339	1.48849	0.760175	1.67488	3.15746	2.22506	3.44797	4.3751	2.70112	1.82841	3.07646	2.31827	3.80142	0
1.94148	1.22055	3.15198	0.971923	2.51045	1.94584	2.97443	4.30816	3.90597	2.6855	1.29737	2.84877	2.80103	0
3.83798	2.80982	0.677393	1.6537	4.37479	2.02964	3.83505	4.58356	2.73815	2.91005	3.26195	1.93716	2.66114	0
4.73648	1.68207	0.901871	1.26342	3.31751	1.99693	3.55641	4.47518	2.98925	2.22264	2.98535	2.55325	3.56539	0
2.54881	1.48361	1.63315	0.345926	1.45127	3.76197	1.62774	4.05807	3.11346	4.14898	1.08202	2.79431	3.02365	0
2.78169	2.65584	3.48668	3.60662	4.25312	3.13226	4.01322	2.77593	3.51733	4.3336	4.84373	3.31593	3.06879	0
2.97932	3.11784	1.32242	1.66722	4.7517	3.0096	4.38122	1.3732	3.16185	4.11811	4.84556	2.9403	2.52811	0
3.15701	1.57505	1.041	0.27563	1.69938	4.24684	1.85989	2.08104	1.74571	4.92109	3.53458	3.49544	3.59193	0
4.61609	2.03694	0.645826	1.29336	3.67534	1.94107	3.52055	4.32194	2.97301	2.322	3.4053	2.35743	3.18635	0
2.5952	2.35023	2.04115	1.33817	3.95187	3.38556	3.56989	3.08993	2.5761	4.47234	5.7449	3.21603	2.86399	0
2.94676	1.15415	0.909562	1.12622	2.41795	2.81253	2.20304	4.28032	1.44994	3.90086	3.68244	2.60172	2.58361	0
4.35199	2.41856	0.764416	1.06283	4.13128	1.94426	3.7714	4.54604	2.76419	2.37978	3.13675	1.986	3.19045	0
1.01985	0.677878	2.97075	0.532711	1.71785	0.771237	1.89045	2.94156	3.111	1.50779	1.63523	2.24676	2.55581	0
1.12622	0.515233	1.21278	1.24396	1.21271	1.91362	2.69393	3.75537	2.43246	2.6113	1.96034	2.60091	2.19331	0
1.916	0.274217	1.26888	0.375575	0.541888	2.98248	1.19254	1.3569	1.45974	4.09498	4.75691	2.77799	2.40311	0
1.13239	0.392201	1.54875	0.285762	1.27984	0.957503	1.42074	3.10576	2.92561	1.58624	0.690745	1.25729	1.87438	0
0.9366	0.449388	1.64557	1.61812	1.24676	1.5728	2.87816	4.66546	2.44397	2.15751	2.46193	2.55239	2.02978	0
3.4096	3.61935	3.07595	1.19823	5.34091	3.38939	4.85473	2.07124	4.20702	4.40848	5.21216	3.58459	3.22398	0
2.37904	1.32076	1.36034	0.335977	1.08857	3.4999	1.3459	1.63841	2.98144	4.23559	1.65377	2.90649	2.7495	0
1.09493	0.740717	3.02042	0.528107	1.70495	1.01683	2.29862	3.30082	3.21515	1.6841	1.37883	2.37798	2.57694	0
4.73398	2.44622	0.725834	1.49934	3.93184	2.18934	3.87627	4.43677	3.00578	2.09074	2.52723	2.34173	3.4575	0
2.28801	2.18431	2.14078	0.674484	3.79323	0.855207	3.5683	6.80911	3.00249	1.91198	0.738799	1.87438	1.41495	0
3.76314	1.63841	0.924816	1.12003	3.32926	1.62345	3.38249	4.57297	2.45062	2.29297	2.42569	2.04538	2.64642	0
2.77452	2.54103	0.995021	1.54541	4.14555	3.01127	3.80019	3.51382	2.71143	4.16	4.05463	2.85957	2.65187	0
2.6403	2.51132	1.70366	0.631347	4.09459	3.01294	3.73773	2.16909	2.67414	4.11958	5.50975	2.88022	2.70849	0
4.96936	2.27699	0.826649	1.61005	3.88774	2.48447	3.76722	4.2704	2.83008	2.36722	3.28497	2.32793	3.64039	0
3.37312	2.38186	1.22781	1.1044	4.09178	3.23933	3.75431	5.08749	2.62112	4.22901	4.85233	3.04385	2.76697	0
3.86482	1.55462	0.585672	0.76564	3.20974	1.70425	3.3951	4.1488	2.77525	1.99391	2.97808	2.03406	2.58111	0
1.39121	0.32302	0.93238	1.21845	0.840295	2.10988	2.97038	2.70152	2.79431	3.11433	0.785445	2.75302	2.77456	0
3.82978	3.0575	1.68992	1.91448	4.8585	3.27505	4.40917	3.71675	3.26744	4.34352	5.028	3.17993	3.00578	0
4.99236	2.94454	1.22781	1.7215	4.52497	2.24306	4.14378	4.83494	3.21869	2.5887	2.6989	2.58361	3.67153	0
2.63656	2.82734	2.58693	1.01649	4.36774	3.1686	3.90953	2.74233	3.571	4.14611	5.23636	3.21559	3.02365	0
1.20114	0.626808	1.62898	0.146937	1.22417	1.36236	1.30369	3.56542	2.5761	2.43347	0.663935	1.65581	1.42757	0
3.00671	0.433921	0.89801	1.26066	1.33039	1.7511	3.11684	3.70483	2.53859	2.71804	3.2231	2.76766	2.81434	0
4.23285	2.4085	1.07865	1.60803	4.08223	1.87698	3.95395	4.55084	2.87649	2.33513	2.89497	2.61389	3.2013	0
2.94731	2.46361	0.894138	0.757564	4.02652	3.04143	3.64955	3.41614	2.5113	4.16758	4.59413	2.83979	2.55068	0
1.08538	0.469854	2.68922	0.443516	1.44658	1.40774	1.95217	3.35797	2.68847	1.96782	1.22182	1.96795	1.6036	0
4.90467	1.33758	0.958529	1.46291	2.79589	2.11123	2.66373	4.52601	2.26625	1.86333	3.10508	1.70366	3.66391	0
2.49675	2.55513	1.13149	1.07254	4.3015	2.78921	3.79179	1.55232	2.71799	3.82891	3.87821	2.66422	2.01973	0
4.21791	1.75491	0.830707	0.885563	3.21904	1.7415	3.32105	4.71631	2.7026	2.126	3.09162	2.36364	3.27666	0
4.41342	1.61264	1.12501	1.12003	3.09947	1.97093	3.10525	4.23346	2.53074	2.3198	3.21248	2.1872	3.21159	0
2.67195	1.27467	1.96339	0.280699	0.914957	3.6019	1.79597	2.26541	2.50503	4.15272	4.7023	2.97639	3.09862	0
4.99586	1.92339	2.329	1.41562	3.42239	2.32968	3.45013	4.74016	3.06209	2.39629	3.28124	2.64329	3.76134	0
4.00507	3.03655	0.659426	0.866875	4.79878	1.81771	4.39822	3.93132	3.39014	2.5742	3.10755	2.41691	2.92324	0
2.44006	2.42952	0.513824	0.47207	4.13533	2.83001	3.67399	0.607867	2.60254	3.89073	4.12231	2.60335	2.26511	0
4.62077	1.94901	0.943648	1.61005	3.69672	1.44125	3.46475	4.66364	2.83008	1.88373	2.58361	1.88921	3.12517	0
4.3728	2.3264	1.05482	1.44658	3.91077	2.03839	3.77661	4.37923	3.10607	2.27122	2.70849	2.47125	3.13242	0
5.55233	1.2419	1.266	1.81072	2.75335	2.70304	2.85957	4.86728	2.14078	2.34594	3.26659	1.74196	4.20207	0
2.25249	1.46636	1.39704	0.476795	3.25294	3.17097	2.96864	1.55462	2.36673	4.29619	5.05792	2.97976	2.60498	0
1.54756	0.464754	3.16419	4.32546	2.54799	2.04706	2.7343	3.72443	2.45346	3.09301	4.1207	2.22572	1.67401	0
1.95619	1.29506	4.46509	1.18653	2.73582	1.53145	3.34847	3.61296	4.28649	2.10309	2.8097	3.25855	3.37172	0
3.93019	2.92896	0.913391	1.92507	4.66806	3.14938	4.10568	5.1331	3.06776	4.20732	4.47585	3.07951	2.8526	0
2.8912	1.64475	1.66596	0.198821	2.08251	3.98876	2.2018	1.41296	3.31473	4.34499	1.24559	3.19362	3.12905	0
4.24333	1.74535	0.523552	1.08538	3.46475	1.64475	3.21872	4.22288	1.97551	2.09625	2.72884	1.82165	2.79498	0
3.78178	2.73136	1.12826	1.01985	4.4213	2.03403	4.19271	4.75734	3.07798	2.47219	2.90529	2.66345	2.73958	0
1.10125	0.569396	0.768645	0.943739	1.05304	1.87358	3.00457	4.67618	2.45441	2.64067	2.53598	2.42666	2.09486	0
4.01215	1.5773	1.2631	1.36373	3.14395	1.9054	3.52322	4.60067	2.77662	2.51406	3.3354	2.49601	2.91729	0
5.2539	2.10172	0.846829	1.80061	3.60203	2.38601	3.70595	4.64334	2.8796	2.30759	3.23752	2.2398	3.83615	0
4.70094	2.48915	0.987803	1.24955	4.22085	2.12066	4.01404	4.48418	3.16139	2.32859	2.44683	2.52547	3.46202	0
0.699854	0.65485	2.20904	0.310964	1.21559	1.1574	1.47131	3.91225	2.84877	2.09074	0.712764	1.73441	1.78436	0
1.48808	1.0384	3.49073	4.48433	2.72144	2.25724	2.83864	3.82075	2.35118	3.1686	0.547674	2.29204	1.041	0
2.90681	1.48849	1.22781	0.310964	1.18946	3.91587	1.82307	1.11451	1.61636	4.52392	2.61147	3.16885	3.12905	0
2.92219	1.79962	1.2775	0.16255	1.47671	4.00953	1.60828	3.30871	2.75302	4.18238	3.95059	2.83592	3.19317	0
1.51932	0.622092	1.13472	1.1747	0.863108	2.14712	2.77664	3.458	2.44302	2.84326	0.806189	2.70038	2.76002	0
2.53894	2.03257	1.35767	1.21271	3.7258	3.05164	3.21281	2.3264	2.30742	4.13747	4.53264	2.79025	2.36054	0
4.29563	2.42555	0.695173	1.00633	4.0342	1.83725	3.80751	4.40461	2.87151	2.4014	3.23404	2.41495	3.06519	0
3.54626	1.332	0.518693	0.670218	2.75802	1.35141	2.72473	4.47596	1.5465	1.99844	2.97808	1.62898	2.22572	0
1.91144	0.444243	1.4573	0.245073	0.514235	3.18183	0.961289	2.85762	1.49337	4.30311	4.50232	2.89862	2.50862	0
4.64312	1.68613	0.618309	1.1507	3.23572	1.98018	2.92168	4.5606	2.08542	1.95846	2.67869	1.50045	3.21515	0
0.918588	0.0283295	1.07189	0.6444	0.310964	1.38927	2.18809	3.84769	1.47668	2.3253	0.542873	1.80406	1.355	0
4.40869	2.00446	0.59973	1.00293	3.5499	1.88205	3.64984	4.19953	2.9077	2.22989	2.31719	2.41397	3.20892	0
0.809313	0.771237	1.83895	1.05957	0.528107	1.31793	0.915141	2.37457	1.79515	2.45881	0.424288	1.42001	1.56217	0
1.32778	0.749498	3.1031	0.551023	1.87104	1.24792	2.47124	3.32105	3.48837	2.01044	1.52141	2.49692	2.75792	0
2.50533	1.87188	1.25438	0.146937	1.8405	3.79384	2.18809	1.18939	3.74996	4.36305	0.542873	2.97976	3.16978	0
4.17933	1.38394	0.299821	0.863108	3.02627	1.79046	3.15035	4.52527	2.33751	2.05423	2.76904	1.94495	2.81763	0
4.87222	1.74919	0.39881	1.19239	3.43298	2.2335	3.33445	4.53589	2.2398	2.33622	3.62489	1.84408	3.67153	0
4.17529	2.02377	0.965908	1.4324	3.65975	1.85989	3.6463	5.24157	2.81763	2.36722	3.24012	2.55153	2.91131	0
1.95327	0.75823	1.2602	0.300905	0.947294	3.05431	1.92177	4.6077	1.48863	4.18808	4.66932	2.84043	2.26738	0
3.75529	2.34486	1.54198	2.43915	3.94252	3.16764	3.6242	4.96316	2.45535	4.10661	4.46636	2.76974	2.83268	0
5.75405	2.16524	1.91506	2.61456	3.83593	3.05324	4.28345	4.62117	3.70989	2.77734	2.79093	3.66843	4.49556	0
4.79059	1.71418	0.75166	1.5127	3.32926	2.01639	3.39358	4.59002	2.72812	2.06419	2.69296	2.36157	3.49309	0
4.03046	0.879487	1.98897	1.29067	1.05631	2.06419	1.09761	2.21043	1.43258	2.94216	0.943648	2.10686	2.83592	0
5.06357	1.44378	1.14436	1.39859	3.11358	2.17164	3.3821	4.55478	2.51841	2.0528	2.53598	2.30305	3.73185	0
4.6726	2.43741	1.04447	1.41803	4.15518	2.08798	3.84042	4.57062	3.05014	2.45881	3.17394	2.28202	3.45191	0
4.79913	1.63841	1.06849	1.27439	3.20591	2.02671	3.61418	4.82825	2.93269	2.18683	3.15998	2.65497	3.62724	0
5.65814	1.95217	0.91721	2.16447	3.55503	2.771	3.37089	4.92505	2.62032	2.26308	2.83592	2.15607	4.38053	0
1.58962	1.02406	2.09217	1.75915	0.866875	2.60132	1.50539	4.02644	1.83723	3.55932	1.61	2.49692	2.31286	0
2.801	1.64053	2.06904	0.0894141	1.24396	3.91451	1.52205	3.33122	3.11738	4.1271	4.96855	2.86021	3.19995	0
2.96154	3.31408	0.93238	0.992678	4.97745	2.97616	4.40503	0.449388	3.4417	4.04883	4.33563	2.91011	2.31068	0
4.36319	1.99995	3.26744	1.06607	3.4749	2.26075	3.39396	4.84212	3.43922	2.74885	3.36372	2.74171	3.42024	0
2.59207	3.99483	4.15824	0.476795	4.45662	3.68627	4.34675	0.93456	6.7282	4.30004	0.810303	4.02107	3.33579	0
1.78868	1.07356	2.02117	1.99489	1.51712	2.69316	2.16524	4.23395	2.16613	3.52722	2.97075	2.49873	2.32472	0
3.19175	2.59545	1.89084	0.896658	4.11008	2.84523	3.7353	2.68473	3.12711	3.9835	4.63501	2.89069	2.90044	0
4.70971	1.69019	0.743098	1.33558	3.2881	2.05566	3.47005	4.80681	2.71581	1.84252	2.27642	2.4218	3.3448	0
4.24409	2.6901	0.760175	1.08857	4.32407	1.79597	4.15397	4.69095	3.33619	2.36933	2.95707	2.64329	3.04542	0
2.75269	3.04359	1.15392	1.17173	4.64616	3.07541	4.07554	1.85298	2.82355	4.13002	4.30114	2.93269	2.39514	0
4.86029	1.22055	0.725834	1.479	3.01344	1.98171	3.31161	3.95439	2.6472	1.97402	2.51219	2.30851	3.50312	0
5.02196	1.61046	1.02702	1.56246	3.09234	2.26774	3.37786	4.62485	2.69072	2.16653	2.64251	2.27191	3.82439	0
0.587145	0.433921	1.81113	0.16255	0.900337	0.826355	0.957503	3.52523	1.70755	1.7978	0.604392	1.23079	0.721489	0
2.02128	0.279673	2.08407	0.300905	1.16875	3.10474	1.76627	4.04764	1.66191	4.24765	4.25212	2.97526	2.90166	0
3.82013	2.28501	1.24559	1.3459	3.89996	3.22638	3.5057	4.71996	2.5113	4.3642	4.48974	3.09812	3.09563	0
3.10984	2.06561	1.05825	0.514235	3.58466	1.69824	3.67456	4.92109	2.59845	2.25253	2.45723	2.22454	2.44302	0
4.74136	2.16524	0.973246	1.71234	3.85729	2.22021	3.6519	5.21341	2.77112	2.38186	2.90529	2.051	3.46824	0
3.30175	2.25135	1.06849	0.805394	3.94314	1.32076	3.678	4.5222	2.77593	2.18053	2.48049	2.4218	2.44492	0
4.57743	2.02671	1.09208	1.14158	3.62474	1.83725	3.63501	4.73301	2.75161	2.10988	2.3096	2.33962	3.26617	0
4.35199	2.54369	1.03403	1.19239	4.11783	1.99995	3.99899	4.61603	3.12614	2.54634	2.73958	2.56177	3.13627	0
1.89453	0.423555	1.72106	0.239957	0.448299	3.03329	1.1574	1.73764	1.76429	4.13348	3.89388	2.83785	2.70481	0
3.9248	1.84602	0.973246	0.724841	3.46606	1.77564	3.32554	4.73699	2.55581	2.39013	3.08255	2.16988	2.9071	0
5.13644	1.91525	1.70949	1.62613	3.63173	2.43051	3.60714	5.0386	2.71945	2.23949	2.96848	2.28537	3.83232	0
4.57917	3.11383	1.00578	1.50827	4.80588	2.23829	4.47557	4.33479	3.56507	2.65346	2.35222	2.59763	3.38716	0
5.10153	1.65942	0.738799	1.5411	3.27943	2.24899	3.4697	4.74903	2.57107	2.27468	2.68772	2.27978	3.69736	0
4.68639	1.84077	1.04793	1.20114	3.52262	2.18053	3.58947	4.63656	3.01989	2.41153	2.31934	2.34384	3.47955	0
4.63784	1.92985	0.686307	1.41562	3.53651	2.16653	3.6519	4.78195	2.62512	2.39219	3.05795	2.19331	3.44205	0
4.70094	2.19309	0.777068	1.58548	3.80055	2.24899	3.83822	4.43985	2.93034	2.27928	2.85704	2.55667	3.47819	0
4.08276	1.51494	0.508942	0.836458	3.12057	1.68207	3.25778	4.05119	2.56854	2.01342	2.7628	1.986	2.99368	0
1.91448	1.64475	3.06106	0.670218	2.60531	1.85124	2.9546	5.29368	4.33708	3.06597	1.27176	2.76627	2.59681	0
4.34478	1.76249	0.654904	1.06283	3.25091	1.93468	3.34966	4.59576	2.51841	2.08798	2.93386	2.05519	3.0881	0
4.84897	1.29794	0.663935	1.40104	3.01241	2.02082	3.12333	4.48187	2.13435	1.81231	2.26625	1.94959	3.55343	0
4.53338	2.37666	0.826649	1.35612	3.89633	1.99844	4.04566	4.8414	3.23099	2.44329	3.13435	2.81367	3.46063	0
5.21173	1.65316	0.56201	1.56458	3.35749	2.36194	3.42244	4.19099	2.79228	2.02964	2.61952	1.94184	3.93536	0
4.80786	0.875469	0.508942	1.4971	2.0403	1.92985	2.69469	4.49106	2.02117	1.62345	2.87401	1.97852	3.53587	0
3.08899	1.92663	1.22182	0.229708	1.16576	4.23181	1.3732	1.0561	1.91506	4.50943	4.72748	3.04647	3.31753	0
4.47021	1.7122	0.677393	0.954377	3.3251	1.89878	3.42759	4.30907	2.61066	2.03984	2.23278	2.28982	3.36219	0
3.83843	2.53391	1.51214	1.16875	4.22794	3.45765	3.81752	5.25663	2.71872	4.50956	5.04018	3.12323	3.07033	0
1.21271	0.915141	1.94495	0.433921	1.63606	1.42333	2.26192	3.90885	3.25898	2.31316	0.645826	2.02117	2.04538	0
4.40484	2.29974	0.87068	1.34075	4.07617	2.03694	3.84648	4.22951	3.14344	2.3577	3.22354	2.39614	3.1995	0
4.33861	2.21043	0.672919	1.07254	3.92272	1.93307	3.88516	4.67892	3.0306	2.363	2.86964	2.45062	3.0449	0
4.74228	2.20056	0.806189	1.52371	3.81736	2.08243	3.95025	5.03366	3.0881	2.30311	2.65497	2.69296	3.63981	0
2.36442	2.01044	3.06673	3.81458	2.67701	3.30124	2.76034	3.29202	2.87151	4.42463	3.79423	3.2031	2.95247	0
2.97665	2.771	1.55771	1.28797	4.47801	3.33364	4.05218	3.03981	2.81301	4.34572	4.77453	3.08103	2.68772	0
4.19516	1.67594	0.622925	0.896658	3.30793	1.7978	3.49407	4.32958	2.75932	2.14057	3.2107	2.18597	2.89436	0
2.26987	1.83725	1.84237	2.33353	3.48269	2.87816	3.17807	2.39219	2.10421	4.02725	4.63372	2.74526	2.33113	0
4.75913	1.43616	0.743098	1.76793	3.05639	2.1445	3.20412	4.45813	2.55153	2.0223	2.48691	2.12266	3.59467	0
2.71243	1.68003	1.20063	0.193654	1.12622	3.79664	1.62988	2.44329	2.58775	3.76801	4.56276	2.41397	3.12856	0
1.99489	1.96471	0.668433	0.457837	3.62586	2.63098	3.11934	1.85124	2.47218	3.53749	2.99699	2.33326	2.00227	0
5.25621	1.96938	1.42001	2.04701	3.41757	2.56558	4.16564	4.80328	3.66419	2.60965	3.18177	3.55817	3.9188	0
4.02408	1.67389	0.725834	1.54541	3.40821	1.61046	3.32716	4.40003	2.56854	2.24544	3.19815	2.13821	2.81036	0
0.847939	0.673297	2.32472	1.03655	0.95084	1.61264	2.66922	5.0223	2.33326	2.52042	2.87151	2.25941	1.43508	0
5.24949	1.96003	0.474464	1.62413	3.69724	2.45011	3.82694	4.24814	3.17024	2.19683	2.91729	2.67262	4.04654	0
1.49485	0.94608	2.11479	0.578178	1.52809	1.38394	1.94743	3.63472	3.41553	2.16139	0.764416	1.74946	1.8286	0
4.02389	2.04562	0.636701	0.885563	3.63451	1.82129	3.50366	4.34719	2.77936	2.27584	3.16931	2.38508	2.81036	0
4.11577	1.73183	0.681856	1.55822	3.36005	2.03403	3.28654	4.69913	2.63622	2.49101	3.08052	2.15227	2.91251	0
5.08302	1.59069	0.654904	1.56458	3.08033	2.13132	3.31901	4.6001	2.47773	2.05709	2.93972	2.36981	3.75722	0
4.92208	2.12467	0.954824	2.13173	3.76363	2.26192	3.77531	4.5977	2.87151	2.13265	2.84685	2.48874	3.69048	0
3.97705	1.59732	0.755923	0.989241	3.07355	1.53845	2.94692	4.09762	2.19939	2.21655	2.96905	1.61425	2.74384	0
0.900337	0.540033	1.21278	0.785647	0.785647	1.50779	2.46073	3.65308	2.37391	2.65979	0.866732	2.24792	1.94804	0
5.18366	2.10717	1.03752	1.64785	3.61146	2.28158	3.38018	4.98704	2.4638	2.03257	2.45535	1.67401	3.79049	0
4.2851	2.36194	0.91721	1.02321	3.96933	1.90869	3.75802	4.58968	2.94959	2.21166	2.99699	2.2876	2.97751	0
4.01842	2.97846	1.02351	1.22417	4.58402	1.84252	4.15823	4.69344	3.23665	2.54458	2.95247	2.151	2.89007	0
5.21763	2.43839	1.01644	1.86149	4.09757	2.48259	3.87086	4.75412	3.11982	2.56471	3.26786	2.74313	3.87294	0
4.86996	1.16708	2.08813	0.457837	1.92507	4.91703	3.08787	4.49966	3.63018	3.64483	0.429353	4.27162	6.88181	0
4.90052	2.10445	1.20368	1.80904	3.82978	2.09212	3.77375	4.79535	2.68472	2.12467	2.1395	2.32257	3.57967	0
1.45594	1.1044	2.18105	0.380486	2.23481	1.4336	2.2323	4.06626	3.2577	2.30759	1.72298	1.94495	1.6919	0
3.93081	3.14208	1.10535	1.25789	4.77525	1.99844	4.48059	5.04402	3.3721	2.78224	3.23535	2.44397	2.86336	0
2.23035	0.559657	1.36034	0.409769	1.11692	3.25123	1.5431	3.91134	1.93247	4.34704	4.81302	2.86525	2.84493	0
1.79722	0.883493	1.78436	0.793577	0.724841	1.64264	0.700597	1.74535	1.37621	2.43249	0.789617	1.73441	1.64351	0
2.42722	2.39834	1.41241	1.95765	3.90443	2.97212	3.54274	1.91851	2.5861	3.97948	4.19908	2.8017	2.3096	0
2.55615	1.0561	0.170703	0.183305	0.943739	3.62752	1.23584	0.887489	1.31413	4.27891	1.98301	2.9403	2.90044	0
5.18744	3.07594	1.30018	2.00469	4.79731	2.53033	4.49233	4.91054	3.54962	2.57506	2.70555	2.60742	3.95081	0
4.00065	1.80508	0.878542	1.15373	3.53128	1.48605	3.43747	4.44065	2.76002	1.96003	2.7495	2.07726	2.82158	0
5.44278	1.7923	-0.219565	1.97069	3.54018	2.46361	3.28145	4.85066	2.20664	1.99391	2.74879	2.01684	4.09891	0
1.74139	0.930698	3.56601	0.613794	1.92356	1.06312	2.44036	3.432	3.44875	1.64896	1.7569	2.64094	2.76489	0
5.17202	2.19184	1.07189	1.79891	3.90145	2.33513	3.64216	5.12982	2.72017	2.18683	3.04121	2.06491	3.74527	0
4.51994	1.68816	0.962223	0.918588	3.13804	1.77936	3.37748	4.42545	2.36157	2.05851	2.4942	1.99342	3.26744	0
5.00317	1.29217	0.595056	1.37631	2.99784	2.12867	2.97269	4.88457	2.19331	2.03839	3.05535	1.79156	3.65078	0
4.29362	1.96159	0.393685	0.982341	3.77794	1.74919	3.56734	4.30617	2.70186	1.91198	1.95267	2.33007	3.11002	0
5.34393	1.71615	0.924816	1.98783	3.37959	2.59039	3.51146	4.57694	2.88145	2.3777	3.40273	2.59845	4.11095	0
5.13104	2.37457	1.12501	1.90532	3.94089	2.49937	3.85059	4.92332	3.08558	2.24425	2.72235	2.58858	3.85178	0
3.61939	2.66294	1.71914	2.16089	4.34108	3.32757	3.94588	5.22786	2.75932	4.38518	4.81508	3.09363	2.887	0
4.40265	2.54369	0.777068	1.14158	4.21807	1.83549	3.99023	4.67258	2.99699	2.27699	2.48233	2.23278	3.08861	0
1.07898	0.515233	1.66999	1.22986	0.943739	1.70025	2.35237	2.91313	1.90544	2.67545	0.668433	2.1548	1.94804	0
3.84408	2.10445	1.00934	1.02321	3.55893	1.82841	3.7065	4.12234	2.89862	2.20427	3.25813	2.44302	2.99534	0
4.65602	1.49092	1.11849	1.35358	3.11031	2.03257	3.58885	4.45379	2.77387	2.05566	3.11787	2.6711	3.39349	0
4.82753	2.41556	0.886362	1.58341	4.02314	2.24187	3.91564	4.32554	3.18085	2.3209	2.92324	2.63779	3.55817	0
2.79397	1.5929	1.49574	0.265471	1.19239	3.89373	1.28927	1.23887	1.89573	4.39641	0.834754	3.04542	3.20355	0
4.47238	1.35963	1.13149	1.68814	3.20378	2.05423	3.23666	5.08553	2.71726	2.30199	3.24573	2.07863	3.35912	0
4.60846	2.31205	0.547674	1.68437	3.82543	1.98783	3.75986	4.61401	2.77731	2.28843	3.01394	2.24792	3.30057	0
4.92346	2.05423	0.618309	1.29604	3.79489	2.19309	3.69559	4.64356	2.84877	1.84077	2.04538	2.23512	3.4941	0
4.15848	2.51769	0.609043	1.41078	4.17318	1.84776	4.07207	4.80681	3.42529	2.36512	2.68697	2.63464	3.256	0
4.30875	2.34916	0.905722	1.01311	3.9964	1.97247	3.69812	4.67459	2.85578	2.35664	2.84172	2.34068	3.29115	0
4.34587	2.21411	1.09873	0.996105	3.76314	1.9054	3.69559	4.28969	2.98591	2.2311	2.887	2.28426	3.10458	0
3.56995	2.3253	0.785445	0.904007	4.02915	1.7775	3.85419	4.57542	3.02847	2.41556	2.86273	2.40013	2.41495	0
5.31021	2.97961	1.20063	2.21569	4.65742	2.76746	4.56474	5.5514	3.77412	3.07018	3.96601	3.18177	4.12482	0
5.32298	2.3198	0.810303	1.72333	3.95672	2.39834	3.88655	4.4185	3.0657	2.30871	3.09563	2.55581	3.95293	0
4.14855	0.991199	2.27754	1.04647	1.61208	4.26532	2.62772	3.26343	2.69816	4.01486	1.66999	3.68411	6.06733	0
2.73922	1.44125	1.91983	0.433921	1.46059	3.94105	1.86676	1.34036	2.18843	4.51478	2.73315	3.07646	3.23925	0
4.41876	2.33947	0.921018	1.46983	3.9223	2.11393	3.91429	4.34513	3.06879	2.19932	2.00812	2.55581	3.33815	0
5.01917	2.26308	1.05482	1.40104	3.94211	2.43347	3.76722	4.23625	2.92146	2.37038	2.65342	2.34909	3.85693	0
2.59754	2.52222	1.18835	1.34846	4.21605	3.02947	3.70928	2.01787	2.75582	4.12363	3.94354	2.79363	2.47496	0
4.37863	1.69623	1.07189	1.38874	3.30985	1.8195	3.37554	4.70684	2.61952	2.00895	2.2809	2.10819	3.14535	0
4.67407	2.10581	0.830707	1.59579	3.68331	2.05566	3.57783	4.8931	2.57861	2.08243	2.86462	2.09754	3.4679	0
4.89329	2.01787	0.439452	1.46059	3.77938	2.22627	3.81827	4.85049	2.85894	2.2335	3.12517	2.48049	3.69131	0
0.789617	0.274217	1.31413	0.528107	1.41078	0.263281	1.35141	2.60549	2.19939	0.938411	0.34712	0.984178	0.810303	0
5.09148	1.70425	0.874616	1.58755	3.31674	2.39116	3.71454	4.673	2.9898	2.27584	2.53946	2.72524	3.71475	0
3.80196	1.94901	0.998616	0.957905	3.53282	1.92177	3.54797	4.44956	2.41397	2.45205	3.07748	2.26284	2.50593	0
1.4132	0.636205	1.16025	2.1834	1.6498	2.03694	3.37438	4.59094	2.94205	2.98705	3.13242	3.02096	2.24676	0
3.95974	1.73183	0.663935	0.836458	3.27745	1.65733	3.2411	4.12344	2.37595	2.06561	2.17486	1.97098	2.9089	0
4.9253	1.77377	0.747384	1.16576	3.29163	2.05137	3.59322	4.78877	2.68922	2.28843	3.18908	2.44873	3.63981	0
3.40925	0.433921	1.08202	0.851746	1.18653	1.32358	0.766914	1.75681	1.03053	1.63628	0.165247	0.924816	2.17981	0
1.3612	0.402694	1.31413	1.40104	1.06283	2.16267	3.02893	3.16478	2.34909	2.78434	1.12826	2.48691	2.40707	0
4.94146	1.72793	0.909562	1.48127	3.50823	2.06136	3.59788	4.55084	2.70038	1.80326	2.4286	2.27642	3.60012	0
3.6049	2.22264	0.973246	1.78525	3.8734	1.80144	3.52055	4.79131	2.38205	2.66608	3.14582	1.65785	2.35639	0
4.18303	0.515233	0.632121	1.42044	1.19239	1.90705	2.81118	5.12261	2.2006	2.19059	2.49782	2.329	3.2022	0
4.05193	1.46138	0.797925	0.83261	2.98518	1.49334	2.88891	4.16071	2.2456	1.71813	2.86462	1.93873	2.8017	0
4.19928	1.53145	1.15709	0.836458	3.16192	1.72009	3.26775	4.94992	2.35118	2.04418	2.43919	2.28649	3.01014	0
1.16875	0.559657	3.06158	0.476795	1.46059	0.915141	2.25017	3.03655	3.24444	1.41815	1.32242	2.26625	2.33856	0
4.38797	2.19059	1.09208	1.22417	3.79867	2.06561	3.69672	4.8306	2.8796	2.47598	3.41843	2.35846	3.41189	0
4.58928	2.49937	0.712764	1.3738	4.19833	2.07124	3.95134	4.4111	3.11297	2.52763	2.7495	2.37493	3.14153	0
3.59541	1.83725	0.50405	0.793577	3.3494	1.60391	3.18418	4.20546	2.45252	2.06702	2.78278	2.14845	2.58111	0
1.05957	0.801166	2.6472	0.27563	1.5127	0.771237	1.99844	3.29706	3.04437	1.37858	1.363	1.96187	2.03974	0
4.55742	1.73377	0.822579	0.971923	3.38993	2.13	3.14452	3.94083	2.08407	2.43643	3.0657	2.051	3.35989	0
4.03308	1.79597	0.913391	1.06931	3.41134	1.52676	3.12034	4.60985	2.25598	2.31093	2.8077	1.73251	2.62591	0
5.05407	2.03839	1.11849	2.04701	3.7439	2.27122	3.69334	4.54904	2.91131	2.09487	2.55496	2.28982	3.69873	0
4.19896	2.51679	1.17906	1.09175	4.28741	2.04274	4.04387	5.14407	2.86901	2.55776	3.4064	2.14207	3.1909	0
2.87474	1.61698	1.36565	0.365726	1.38626	3.96218	1.28053	0.779849	2.7889	4.33018	0.878542	2.94263	3.17671	0
1.35102	1.21439	3.52388	0.733085	2.02811	1.28053	2.2323	4.02624	3.76622	1.89712	2.02405	2.49601	2.73744	0
4.68132	2.07825	0.636701	1.29336	3.77625	2.21777	3.77687	4.79899	2.89375	2.44231	3.37248	2.68772	3.3774	0
1.3459	1.07009	1.60146	0.957905	1.40835	1.65733	3.60622	5.41416	3.11689	2.72768	0.449509	3.0657	2.38103	0
2.70264	2.54458	1.65173	0.569168	4.15435	3.25647	3.76905	0.855207	2.78686	4.3629	5.88358	3.12953	2.6937	0
4.10297	2.22506	1.40475	1.20114	3.75578	1.89212	3.82175	4.54724	2.99534	2.44329	3.18589	2.50413	2.96848	0
5.42489	1.99995	1.17594	2.25795	3.64638	2.64067	3.61966	5.20914	2.71945	2.3373	3.78974	2.17113	4.11313	0
1.06283	0.535096	1.13472	0.657357	1.1507	1.97864	2.70228	3.55835	2.38609	2.94751	0.403926	2.42472	2.39614	0
4.83943	2.00446	0.886362	1.71418	3.72605	2.12734	3.59197	4.91296	2.63622	1.80326	2.66498	2.25368	3.61124	0
1.53462	0.930698	3.06313	0.49091	1.95765	1.32076	2.44036	3.95243	3.45471	2.3373	1.2889	2.25138	2.12004	0
1.847	1.00956	1.92459	0.265471	1.84538	1.44632	1.9021	3.45407	3.17163	2.18683	0.59037	1.55994	1.92617	0
0.914957	0.454521	1.34154	1.33558	0.769662	1.75491	2.50214	3.47637	1.96339	2.66687	0.89801	2.25713	1.65581	0
5.31984	2.65107	0.958529	1.78525	4.24922	2.46073	4.14306	5.0229	3.26364	2.27928	1.87604	2.62192	4.0163	0
5.246	1.70425	0.822579	1.74318	3.24067	2.26425	3.23221	4.66482	2.48508	2.20427	2.61228	1.91983	3.90908	0
5.26535	1.97864	1.12826	1.77315	3.54929	2.47882	3.74952	4.98013	2.90468	2.00446	2.65497	2.61952	4.15008	0
4.55885	2.22869	0.388549	1.31202	3.95248	1.95059	3.78539	4.51056	2.94495	2.18431	3.11493	2.58444	3.46548	0
2.2337	1.11451	2.58527	1.50158	1.63011	3.0665	2.15622	3.47882	2.84877	4.13783	2.36673	3.01123	2.70629	0
5.1306	1.73377	0.429353	1.67488	3.29631	2.24899	3.45729	4.12802	2.60742	2.06277	2.64642	2.41593	3.82076	0
2.69841	2.69621	1.64968	0.6444	4.19516	3.17618	3.84503	1.08736	3.03963	4.19151	4.73839	2.86084	2.52899	0
3.24149	2.44329	0.928603	0.866875	4.03754	1.61264	3.84503	4.58818	3.06879	2.35451	2.75582	2.33113	2.42569	0
4.84905	1.50539	0.677393	1.18946	3.04094	2.16781	3.41054	4.82143	2.41887	2.18683	2.59763	2.34384	3.51569	0
5.27088	1.38126	1.20368	1.66722	3.14486	2.42654	3.18885	4.81299	2.15859	2.09625	3.12905	1.87935	3.95421	0
2.93901	2.93917	1.71336	0.781666	4.60446	3.35718	4.21822	1.39986	3.19045	4.41973	5.6158	3.29526	2.74313	0
5.36838	3.29664	1.50045	2.08767	4.96017	2.83467	4.67976	4.98866	3.83853	2.87051	3.21736	3.04121	4.12518	0
0.429109	0.333768	1.51679	0.541888	0.390283	0.965065	0.607867	2.65187	0.393685	1.56602	0.383404	0.83879	0.677393	0
2.68991	2.56731	1.03053	1.0299	4.14755	3.35797	3.51112	3.389	2.67262	4.45564	4.83665	3.18817	2.87338	0
5.41351	2.30087	0.672919	1.78868	3.88363	2.58105	3.64246	5.04926	2.61791	2.18683	2.80504	1.92617	4.00929	0
2.66029	1.7606	1.0129	0.167746	1.12313	3.86232	1.43616	3.03764	3.09812	4.09063	4.4342	2.66575	3.12517	0
4.83308	2.3264	1.37883	1.54541	3.91938	2.43446	3.61935	4.53005	2.8077	2.37666	3.48938	2.31394	3.5307	0
2.5594	1.58401	1.93403	0.340955	1.35867	3.70984	1.95217	0.855207	3.21515	4.1545	0.613682	2.91908	3.36104	0
3.80408	2.19932	0.965908	0.741287	3.80595	1.84427	3.77479	4.60906	2.77662	2.41455	3.06364	2.38609	2.53424	0
4.44642	1.68207	0.542873	1.03323	3.34607	1.75491	3.27505	4.70725	2.27978	2.09074	2.17734	1.74196	3.19544	0
1.847	1.11451	4.09099	1.00633	2.3048	1.39193	3.15422	3.92306	4.11439	2.08936	2.16363	3.30382	3.37437	0
2.98571	2.16524	1.58417	0.495595	1.86786	4.13765	2.45495	1.02045	3.69076	4.45971	1.07865	3.27248	3.45471	0
3.90676	2.06561	0.965908	1.14463	3.68622	1.73764	3.7423	4.79703	3.07084	2.35983	2.44588	2.68847	2.80036	0
2.84893	1.8871	1.86102	0.0263303	1.57089	4.04764	2.01342	2.31538	3.30666	4.31575	0.681856	3.09112	3.31994	0
1.08538	0.096185	0.984178	0.85933	0.836458	1.79962	2.39219	3.74257	2.0496	2.69545	1.49574	2.21384	1.79336	0
2.69275	2.74596	1.50514	2.20657	4.39657	3.33485	3.99524	1.99087	2.87649	4.3701	4.45099	3.11542	2.84685	0
4.7272	1.8195	0.403926	1.05304	3.43094	1.96938	3.32309	4.30953	2.39714	2.31759	3.02847	2.01973	3.486	0
2.97128	1.91851	1.44747	0.16255	1.53895	4.11811	1.70425	0.818006	3.2708	4.06568	4.09006	2.75722	3.10656	0
2.79653	1.81412	1.38927	0.0315947	1.62613	4.00582	1.38927	2.7365	3.2611	4.17475	3.25898	2.91729	3.04595	0
4.23422	1.64896	1.41495	1.90379	3.51514	2.44622	2.99557	4.75451	2.09888	3.18324	4.00305	2.01394	2.90468	0
2.89178	2.78712	2.88392	1.10125	4.30889	3.46829	3.92843	3.34168	3.67966	4.34455	5.58126	3.3483	3.17717	0
4.01291	3.04251	0.50405	1.32255	4.68949	1.92501	4.30785	4.64258	3.42313	2.47598	3.07442	2.16613	2.61791	0
0.813221	0.826355	1.99786	1.07898	0.462591	1.56147	0.949898	2.76391	1.64145	2.52493	0.810303	1.88264	1.28036	0
5.19576	2.56645	1.18835	1.93405	4.28248	2.47219	4.20749	5.08503	3.39498	2.43643	2.67869	2.66728	3.9882	0
4.1634	1.07703	0.33667	0.85933	2.77517	1.46636	2.9634	4.24033	2.08135	1.9863	2.43919	1.54198	2.79767	0
4.38849	2.95519	1.22482	1.46753	4.53688	2.42754	4.06276	5.14638	2.96222	3.10525	3.78599	2.13821	3.079	0
2.855	1.48116	0.973246	0.280699	1.22702	3.88306	1.87188	1.60828	1.47187	4.61581	2.44968	3.22924	3.11198	0
5.3482	2.58616	1.25729	2.28058	4.30349	2.52222	4.00809	4.71317	3.11297	2.30087	2.66038	2.25483	4.05078	0
4.64788	2.33622	0.743098	1.08219	3.99601	2.03111	3.5434	4.73996	2.84429	2.09212	1.95728	2.14718	3.30909	0
3.87689	2.80982	1.37883	1.14158	4.386	2.0866	4.09384	4.81207	3.35989	2.76248	3.6791	2.32686	2.59681	0
1.26066	1.07356	2.29645	0.495595	1.78353	1.73571	1.97247	3.81702	3.37134	2.64228	0.954824	2.18351	1.95267	0
3.31636	0.598323	1.8076	1.08219	0.809313	2.00596	1.30655	2.31427	1.20063	2.68627	0.75166	1.87438	2.31827	0
4.6414	2.12467	0.672919	1.25234	3.79465	2.02082	3.74605	4.50993	2.93796	2.23949	2.93738	2.61147	3.34011	0
0.9366	0.480019	1.93247	0.622592	0.390283	2.07124	0.998573	3.64512	1.5306	2.95401	0.604392	1.98152	1.94959	0
3.36188	2.42853	0.613682	0.896658	4.0585	1.74919	3.90246	4.39291	3.11689	2.44524	3.3448	2.62591	2.61228	0
3.93638	2.40648	0.508942	0.777675	3.97409	1.70025	3.67743	4.69105	2.82224	2.26308	2.9161	2.33326	2.89497	0
4.85374	1.79046	0.947384	1.43715	3.44446	2.06419	3.27333	4.77289	2.2456	2.06984	3.00851	1.78436	3.5474	0
2.58814	2.36194	1.23079	0.54646	3.95369	3.01183	3.5577	1.3732	2.60985	4.079	5.20866	2.86901	2.4218	0
4.78277	2.33404	1.06849	1.31202	3.90739	1.98018	3.806	4.22056	2.99313	2.25371	3.02311	2.63543	3.5394	0
2.95226	2.84916	2.3657	1.38626	4.51499	3.55964	4.33642	1.02766	3.62459	4.62673	6.12949	3.68244	3.01665	0
5.03677	1.96782	0.772862	1.50827	3.68463	2.42455	3.55867	4.53892	2.79093	2.39527	3.38529	2.48508	3.82704	0
4.26532	2.49473	0.83879	1.04647	4.04513	1.83901	3.74686	4.87709	2.97244	2.29974	2.00373	2.15354	3.13291	0
4.45331	2.22748	0.83879	1.1138	3.92646	2.0149	3.87298	4.80458	3.15151	2.39322	2.85768	2.55496	3.3271	0
2.35357	2.54987	1.15709	0.551023	4.02634	2.64709	3.60929	1.67389	2.82877	3.71977	4.7464	2.59023	2.20664	0
0.797526	0.062293	1.91346	2.83916	1.60192	1.49334	2.62446	4.34071	2.13435	2.39732	2.13435	2.04257	1.72106	0
2.13173	2.178	1.45485	1.24955	3.7702	2.5819	3.32187	1.58178	2.4041	3.66591	4.33982	2.33326	1.80583	0
4.99906	0.554769	0.595056	1.51049	1.82572	2.29523	2.52042	4.70119	1.83551	1.88036	2.43343	1.67401	3.60374	0
4.07938	2.82131	0.659426	1.30672	4.4355	2.01044	4.29927	4.53674	3.56194	2.63098	3.02687	2.78278	2.84429	0
4.9102	1.76249	0.806189	1.44423	3.4588	2.25606	3.52055	4.77433	2.83397	2.14842	3.34558	2.42763	3.6401	0
2.02402	0.34448	1.83379	0.229708	0.50027	3.15711	1.48849	3.80575	1.79336	4.25331	5.10728	2.9992	2.53598	0
4.93859	1.48605	0.494232	1.24676	3.15477	2.17291	3.6857	4.54652	2.9071	2.13132	3.19634	2.64407	3.73871	0
1.43715	0.736308	2.13435	0.345926	1.24396	1.35416	1.58401	3.7646	2.95074	2.05851	0.627529	1.39445	1.32517	0
4.13701	1.01683	0.580963	0.785647	2.61915	1.52441	2.70077	4.31166	1.96034	1.82486	2.37084	1.30857	2.79093	0
4.45294	2.27699	0.781262	1.17173	3.91204	2.02818	3.82496	4.84462	2.71362	2.3829	3.04752	2.33751	3.1995	0
4.577	1.95532	0.499147	1.16576	3.62558	1.99844	3.3186	4.29046	2.55922	2.38601	2.62671	2.01684	3.30545	0
1.69751	0.871439	2.30742	0.631347	1.93405	1.3151	2.19559	3.75696	2.91729	2.27928	1.38667	1.8076	1.84066	0
5.10352	1.68003	0.905722	1.479	3.35969	2.41956	3.52789	4.43557	2.45252	2.2335	3.12953	2.34804	3.91329	0
2.05766	0.464754	1.61213	0.290817	0.27563	3.08941	1.48116	3.24772	1.69387	4.26324	4.82508	2.94263	2.55496	0
1.94148	0.285121	1.52831	0.0473823	0.582667	3.26688	1.49818	4.23115	1.39704	4.29356	5.28798	2.91251	2.68397	0
4.05959	1.71022	0.708384	0.961423	3.30523	1.70823	3.64601	4.76191	2.68622	2.126	2.87836	2.49147	3.02365	0
1.46291	0.94608	2.85132	0.69144	1.7378	1.30941	2.05851	3.59819	3.4148	2.19683	1.041	2.14335	2.15733	0
2.42537	1.35141	1.85766	0.310964	0.851746	3.63382	1.70025	3.12134	2.26398	4.24603	4.7026	3.0881	2.93796	0
4.91121	1.88036	0.806189	1.33817	3.44581	2.21533	3.65747	4.71337	3.02311	2.13397	2.29976	2.25483	3.73582	0
2.02538	1.332	4.06778	0.999524	2.67701	1.61046	3.07541	3.49304	4.15391	2.10717	2.13047	3.28207	3.50777	0
4.8848	1.95689	0.547674	1.30139	3.6143	2.22869	3.42244	4.70766	2.39614	2.17419	2.80637	1.62269	3.3683	0
4.31355	2.71879	1.32791	1.14463	4.34546	2.05851	4.20833	4.70006	3.32671	2.5595	3.29649	2.59681	3.24228	0
5.45996	2.01639	0.951109	1.6653	3.63367	2.47882	3.68428	4.15468	2.82158	2.25371	2.87587	2.63306	4.20966	0
1.86945	0.464754	0.542873	0.0315947	0.457837	3.14305	0.540033	0.213703	0.924816	3.684	2.27417	2.43919	2.39813	0
4.36507	1.65525	0.454521	0.904007	3.15208	1.92663	3.23221	4.52257	2.44968	2.31205	2.96848	2.23863	3.05431	0
5.04345	1.65106	0.414127	1.3173	3.03236	2.34055	3.23577	4.79375	2.27529	2.24306	3.11002	2.0538	3.70664	0
4.70343	2.16653	0.901871	1.59579	3.79796	2.0528	3.78795	4.16388	2.91848	2.21288	2.59927	2.38205	3.43851	0
5.08342	2.92107	2.31286	3.21777	4.28553	3.25079	5.54341	4.14808	5.18954	3.8898	2.89862	5.23835	4.81992	0
4.70075	1.86504	0.0884181	1.58962	3.37096	1.77002	3.50161	5.03004	2.76419	1.93628	2.73815	2.23629	3.59831	0
4.65241	2.51588	0.508942	1.21271	4.04329	1.91198	3.92776	4.24294	3.0734	2.26308	3.09912	2.48691	3.46893	0
2.71034	1.77564	1.37621	0.395168	1.46291	3.82521	1.63202	2.89829	2.78073	4.13511	4.28786	2.69221	2.94205	0
1.81407	1.49334	2.81698	0.982341	2.57706	2.14188	2.84457	4.4555	3.99412	2.9168	1.36565	2.71143	2.43343	0
4.91847	1.45136	0.954824	1.30406	2.98783	2.2347	3.28017	4.05356	2.54206	2.36406	3.04857	2.10819	3.78196	0
5.06935	1.11786	0.294523	1.43715	2.60609	2.35664	3.0925	4.46167	2.29645	1.82307	2.329	2.14718	3.68189	0
0.817119	0.349821	0.57151	0.224574	-0.0315947	0.949898	0.376383	0.879487	0.137896	1.52205	0.439452	0.677393	0.854823	0
4.56862	2.80573	0.538059	1.48582	4.52223	2.2323	4.40876	4.68949	3.33185	2.57678	2.6937	2.77662	3.46996	0
3.88124	2.126	0.854823	0.933016	3.8155	1.67389	3.78281	4.43395	2.93913	2.40445	3.38641	2.36776	2.78754	0
0.943739	0.328399	0.995021	0.69144	1.01649	1.73958	2.91067	3.5182	2.48325	2.5819	2.20302	2.41789	2.20423	0
4.79444	1.94743	0.595056	1.31993	3.59772	1.91034	3.53386	4.36564	2.90589	1.96938	2.49329	2.27417	3.62842	0
5.06177	1.90869	0.75166	1.4324	3.47555	2.07124	3.32187	4.42802	2.49601	2.02671	2.58361	1.46945	3.70772	0
4.38901	2.00745	0.882457	1.6653	3.63922	1.97247	3.52689	4.53017	2.62989	2.01044	2.40509	2.09486	3.17902	0
4.90264	2.12867	0.858804	1.56035	3.60719	2.11663	3.74872	4.65516	2.99865	2.37457	3.16559	2.52635	3.79572	0
4.31791	3.04466	1.23079	2.06162	4.7117	2.61708	4.21069	5.12288	3.08558	3.65718	3.99106	2.58693	3.26702	0
2.56505	2.26774	1.39704	0.674484	3.84701	3.03002	3.48924	1.52911	2.50323	4.11386	5.17912	2.87649	2.37595	0
4.36907	2.11932	0.730168	1.09493	3.69646	1.96782	3.59166	4.49966	2.82158	2.34379	2.91848	2.35535	3.22046	0
4.47382	2.54015	1.00578	1.1507	4.20887	2.19434	3.88887	4.7588	2.77318	2.28158	2.41887	2.24792	3.28745	0
4.13752	2.4807	0.991417	1.07254	4.07349	1.91362	3.86304	4.80958	2.93913	2.44427	3.07493	2.27866	2.88207	0
4.049	2.1445	0.595056	1.00633	3.69933	1.76249	3.6563	4.40309	2.75722	2.27122	2.85323	2.17113	2.99423	0
2.74597	2.80231	1.363	1.43002	4.46634	2.98133	3.89003	2.79267	2.79025	4.16582	4.48338	2.93796	2.53424	0
5.43045	1.2328	1.21278	1.67678	2.54142	2.56124	3.01738	4.81032	2.17734	2.01044	3.06467	2.02692	4.04033	0
4.6726	2.0866	0.618309	1.54541	3.75233	2.09212	3.684	4.15752	2.5761	1.87188	2.88269	1.97551	3.45785	0
4.71028	1.6841	0.924816	1.18653	3.17035	2.14712	3.49304	4.7253	2.69296	2.32859	3.24401	2.36673	3.43424	0
4.55698	1.8087	0.414127	1.00293	3.42582	2.08798	3.51887	4.00396	2.55667	2.23949	2.56347	2.22808	3.53425	0
4.50329	2.79198	0.854823	1.22131	4.29892	2.02964	4.15646	4.80439	3.35024	2.36828	2.81367	2.81367	3.42637	0
3.08899	3.21099	1.85259	2.5905	4.85645	3.40153	4.40904	2.93498	3.47511	4.46689	4.44607	3.3279	2.75652	0
1.29604	0.376383	2.29204	0.355843	1.6321	1.30941	1.81231	3.72443	3.20713	2.06277	0.595056	1.71336	1.60574	0
2.6222	2.45108	1.53516	0.892969	4.17464	3.1776	3.79486	2.10172	3.04068	4.34851	5.43027	3.12031	2.56516	0
2.00329	2.17036	2.53511	2.50105	1.91752	3.25735	1.94584	1.58847	2.38609	4.25475	3.64097	2.88762	2.71435	0
5.51101	1.48849	1.16969	1.96636	3.03993	2.49659	3.43711	4.39683	2.75722	1.97093	2.86901	2.62512	4.15182	0
5.33843	1.7511	1.08873	1.736	3.41653	2.47219	3.17192	4.95887	2.42666	2.46743	3.06261	1.96034	3.93125	0
2.03625	0.583915	1.74571	0.33099	0.863108	3.22638	1.40774	1.28345	1.80406	4.20698	4.20867	2.9161	2.63385	0
1.33558	0.994891	2.78005	-0.0105331	1.75208	2.01787	2.43051	4.6337	3.80167	3.08166	1.24559	2.48783	2.45441	0
5.03492	2.3198	1.19143	1.53027	4.0643	2.22748	3.99316	4.5861	3.13627	2.35876	2.57527	2.77387	3.6456	0
5.11592	2.25489	1.02702	1.4971	3.7801	2.56124	3.65131	4.64965	2.92205	2.51679	3.13242	2.52547	3.7228	0
5.0629	3.11934	1.5465	1.98783	4.78004	2.51679	4.55764	4.77757	3.72414	2.7321	2.83008	3.01502	3.64184	0
0.824885	0.540033	1.06509	1.86468	1.19239	1.51494	2.8788	4.35435	2.13176	2.42056	0.576242	2.51841	1.84919	0
5.00048	1.21747	0.650371	1.34846	2.44006	2.22989	2.86086	4.63754	2.4286	2.05423	2.69146	1.94804	3.63573	0
5.14881	2.04562	1.11849	1.6537	3.78154	2.42754	3.66764	4.80514	2.9467	2.22264	3.0657	2.35846	3.80905	0
4.09441	2.03403	0.627529	0.989241	3.48172	1.98783	3.53287	4.4534	2.62989	2.27006	2.72812	1.99046	3.01448	0
4.1819	3.00904	1.05482	1.1747	4.65732	2.18179	4.24911	4.96427	3.18406	2.8807	3.3107	2.4041	2.86084	0
1.83887	1.19254	4.12946	0.889271	2.50704	1.60172	3.10322	3.76644	3.97934	2.01193	2.37493	2.99644	3.06054	0
5.34262	1.99239	0.890255	1.736	3.4901	2.47882	3.57403	4.84435	2.80303	2.22021	3.00414	2.4942	4.09357	0
5.32098	1.27173	1.00578	1.76443	2.72144	2.30311	3.22638	4.82024	2.56854	1.97556	2.16488	2.25138	4.02779	0
4.03102	1.39458	0.717132	0.87438	3.11638	1.79046	3.36229	4.08168	2.60335	2.16653	2.46474	2.16738	2.78958	0
3.81411	1.93788	0.224964	0.781666	3.5098	1.47131	3.37205	4.43045	2.38811	1.99542	2.21264	2.15354	2.44968	0
4.59429	1.6213	0.882457	1.22986	3.2505	1.98935	3.64601	4.47596	3.08457	2.06419	2.49511	2.66498	3.42096	0
5.09452	1.18623	0.654904	1.5127	3.23613	2.19184	3.1098	4.49486	2.30851	1.89546	2.49873	1.87106	3.78247	0
3.06083	1.78122	1.14755	0.203982	1.00293	4.17318	1.63415	1.21747	1.20976	4.45971	1.27464	3.12031	3.31553	0
4.42231	2.27584	1.03403	1.1507	3.85684	2.0528	3.8965	4.98611	3.15857	2.2335	3.30179	2.62192	3.39942	0
1.62812	0.603101	1.37094	0.27563	0.260381	3.01183	1.35963	3.59664	1.45974	4.04506	4.34069	2.56854	2.18474	0
4.90084	1.42074	0.764416	1.55184	2.98783	2.09762	3.51954	4.41316	2.67414	1.71813	2.83592	2.28426	3.66504	0
4.8293	2.03984	0.434408	1.20983	3.51982	2.14973	3.49201	4.70027	2.72812	2.12066	2.71362	2.29093	3.44311	0
2.90106	2.48634	1.16969	0.618198	4.011	3.0827	3.60437	1.35963	2.73744	4.14916	5.0011	2.9898	2.86147	0
0.9366	0.530148	1.47187	1.22702	0.95084	1.79046	3.19443	4.62307	2.66575	2.5049	1.48863	2.7274	2.19209	0
4.71859	2.52132	0.789617	1.21559	4.25282	2.08521	3.93973	4.18238	3.05171	2.31759	3.51042	2.41003	3.3483	0
4.87399	2.0149	1.37621	1.65564	3.72351	2.33295	3.71288	4.79366	3.00194	2.19808	3.31513	2.52723	3.68495	0
4.15749	1.94426	0.0773894	0.851746	3.58262	1.81591	3.53815	4.64378	2.62909	2.16396	3.2829	2.26852	2.86021	0
4.3941	2.8673	1.06167	1.31202	4.43313	2.22506	4.29696	4.48558	3.36754	2.56731	3.28951	2.81895	3.31231	0
2.09791	1.56147	4.49172	1.14158	2.68348	1.67389	3.40567	3.76644	4.38344	2.28501	2.71508	3.50479	3.60524	0
4.4194	2.27353	2.88885	1.25512	3.78106	2.43643	3.98075	4.91836	3.88096	3.01461	3.94868	3.26744	3.60042	0
3.9733	1.97864	0.627529	1.05304	3.66784	1.86847	3.61082	4.41686	2.65652	2.42754	2.52635	2.20181	2.9161	0
5.42763	2.18431	0.969582	2.04567	3.92916	2.66451	4.05846	4.74204	3.24573	2.26308	3.1707	2.60009	4.22369	0
2.31618	2.3242	1.4524	1.99489	3.96134	2.80436	3.50366	1.92985	2.61631	3.97906	4.32617	2.63464	2.29425	0
2.61915	2.7906	2.97188	1.7396	4.39462	3.00793	3.9472	1.36779	2.93034	4.1997	5.0272	2.94843	2.46193	0
1.66722	1.10778	3.65078	0.773674	2.12803	1.59511	2.90512	3.87838	3.94075	1.97864	1.75504	3.01989	2.98312	0
0.761607	0.607867	1.42001	0.224574	1.09809	1.1574	1.47625	3.37979	2.88577	1.78677	0.542873	1.15074	0.862773	0
3.96174	2.18305	1.13794	0.863108	3.86835	1.82664	3.63382	4.24733	2.91968	2.3577	3.06002	2.34804	2.74738	0
5.03657	2.39116	0.595056	1.5411	4.11474	2.34379	3.90269	4.9556	3.05951	2.11123	2.73028	2.33962	3.69241	0
5.07107	1.81051	0.609043	1.35867	3.42547	2.25489	3.57085	4.57133	2.83656	2.15881	2.34699	2.47032	3.68993	0
4.87141	0.535096	1.63523	1.76967	1.05304	2.39424	3.06439	5.03063	2.6147	2.76746	2.48965	2.60254	3.82051	0
5.0484	1.68816	1.08202	1.43478	3.29241	2.36933	3.71371	4.43959	2.9161	2.05994	2.85005	2.73458	3.81784	0
1.3173	1.04196	2.42375	0.609379	1.54541	1.6061	2.20674	3.74284	3.53844	2.54811	0.444485	2.07316	2.00958	0
1.6321	0.938411	2.41003	1.76793	2.18574	1.72009	2.67545	3.93376	3.14487	2.30311	1.76797	2.44683	2.48783	0
5.09587	1.92014	0.850831	1.76793	3.63645	2.36933	3.74739	4.91537	3.08961	2.25489	3.23535	2.7209	3.89636	0
4.76561	2.19184	1.1945	1.64785	3.95309	2.24781	3.99712	4.26261	3.04909	2.25371	2.81169	2.6542	3.50976	0
4.11508	2.30871	0.712764	0.922209	3.7668	1.65106	3.55576	4.24001	2.92027	2.17926	2.67262	2.10155	2.9898	0
0.265471	0.124346	0.434408	0.209139	0.325995	0.402694	1.76627	3.23354	1.51679	1.35416	0.609043	1.36565	1.35767	0
4.94963	1.69623	1.28606	1.7396	3.51639	2.13925	3.57562	4.7589	2.8242	2.20674	2.94843	2.66652	3.59891	0
5.42383	1.96782	0.768645	1.81741	3.65839	2.69087	3.45658	4.74628	2.54724	2.43051	3.00959	2.42666	4.04731	0
4.68813	2.06419	0.947384	1.18358	3.73539	2.03403	3.72552	4.47001	2.85578	2.15622	3.00249	2.27191	3.39126	0
2.89352	1.85816	1.19757	1.33299	3.52727	1.49334	3.38172	4.7246	2.51752	2.1601	2.83268	1.95267	1.90221	0
4.82135	1.96782	0.672919	1.45127	3.58554	1.99693	3.18885	4.7587	2.15354	2.06561	2.29756	1.67601	3.41152	0
2.76663	2.85372	0.894138	1.50604	4.52737	3.12184	4.08607	2.06984	2.88269	4.16775	3.87386	2.81829	2.39714	0
4.76147	2.04129	1.50981	2.21114	3.78418	2.06984	3.91112	4.42924	3.1995	2.20674	2.08135	2.70555	3.52094	0
5.0544	1.72206	0.50405	1.48808	3.29826	2.26774	3.42022	4.88671	2.60742	2.13265	3.30828	2.31502	3.83639	0
4.23742	1.47871	0.677393	1.4926	3.1835	1.94267	2.96456	5.04416	1.78074	2.85503	3.37324	1.8005	3.12953	0
5.3528	1.96003	1.83033	1.96491	3.41099	2.5819	3.62087	4.90207	3.17948	2.51314	3.06879	2.78958	4.04537	0
4.58305	1.39458	1.02702	1.11692	2.98677	2.03984	3.30332	4.94081	2.52899	2.07825	3.19634	2.21741	3.36525	0
4.90678	1.98783	1.22182	1.83887	3.40192	2.14057	3.62631	4.66418	3.14914	2.3253	2.9565	2.55496	3.57782	0
4.70438	1.55462	1.11194	1.86945	3.26225	1.92339	3.21463	4.73261	2.61791	1.96003	3.23448	2.17858	3.4484	0
1.45594	1.34036	2.49873	0.375575	2.21796	1.9021	2.51132	4.21471	3.722	2.84391	1.00934	2.29204	2.0524	0
2.22923	1.06661	2.46005	1.16276	1.76443	2.70907	3.00345	3.07646	2.97244	3.60499	2.58941	3.15387	2.91968	0
3.26306	3.22053	2.66957	2.25249	4.9629	3.10068	4.50155	3.83333	3.9033	4.12783	4.441	3.20355	2.84685	0
5.61783	2.09899	1.40731	2.02402	3.77697	2.80162	3.72251	4.49625	3.02311	2.18557	3.28579	2.52547	4.32221	0
2.82929	1.7719	1.75132	0.49091	1.95327	3.81702	2.24187	1.13449	3.80611	4.44146	1.32242	3.38342	3.25387	0
5.36627	2.61378	0.310392	1.79551	4.23727	2.48821	3.97055	4.28064	3.14392	2.14973	2.54206	2.18843	4.15477	0
2.72968	2.02671	2.43439	-0.821007	1.3738	3.99357	2.82131	2.47029	3.27874	4.21689	3.32948	2.9149	3.15198	0
4.49568	1.39458	0.818499	1.71418	2.82743	1.96938	3.30332	4.74874	2.30742	2.06843	3.50877	2.2269	3.2928	0
2.58893	2.25135	1.07865	0.518869	3.89847	3.16191	3.45336	2.71506	2.48141	4.23231	3.95886	2.90408	2.30851	0
2.82494	1.39458	1.50045	0.300905	0.992678	3.90794	1.06312	1.74343	2.01829	4.30648	5.18198	2.97526	3.32233	0
2.69982	2.98419	1.07865	0.896658	4.67171	2.99387	4.2262	1.49576	3.0274	3.9262	4.15633	2.85894	2.50772	0
1.44423	0.603101	1.68398	2.0005	1.16276	2.3198	2.7225	3.60529	2.46005	3.20688	1.24559	2.50413	2.64172	0
5.05117	2.17419	1.34963	1.67297	3.89996	2.46073	3.61113	5.20324	2.92146	2.51497	3.91968	2.44111	3.66674	0
4.75033	1.2328	0.951109	1.49485	2.89585	1.98171	3.1935	4.67639	2.28871	2.01193	2.77181	2.3215	3.48295	0
3.95208	2.37038	0.826649	0.907666	4.00584	1.69019	3.95894	4.34366	2.94843	2.18431	2.09217	2.55239	2.96222	0
2.11558	1.08393	3.48803	0.716554	2.21683	1.75681	2.92472	5.66038	3.85483	2.45688	1.59931	3.047	3.23012	0
2.29749	1.62345	4.36476	1.29872	2.81115	1.96003	3.24728	3.97864	4.46573	2.37561	2.0496	3.5394	3.7276	0
4.54519	1.6615	0.59973	1.25234	3.19261	2.1601	3.36033	4.64017	2.73028	2.55776	3.50512	2.25483	3.2687	0
4.78092	2.3513	1.24852	1.35358	4.04513	2.14319	3.96498	4.22736	2.93855	2.44134	3.2973	2.55325	3.5849	0
3.78919	1.35963	0.901871	0.678739	2.79011	1.53379	2.59208	4.07842	1.71336	2.18809	3.40015	1.50514	2.88207	0
4.97672	2.2371	0.850831	1.27166	3.81504	2.17926	3.57053	4.62862	2.61389	2.3198	3.14867	2.18597	3.69626	0
2.68634	1.41815	0.866732	0.395168	0.900337	3.91992	1.17669	0.554769	1.08538	4.2982	2.56432	2.93855	2.99423	0
4.25327	2.52943	0.846829	1.08857	4.25192	1.82664	3.94698	4.39361	3.0449	2.29862	2.82551	2.35535	3.08255	0
2.61302	1.0942	0.901871	0.203982	1.27712	3.75192	1.59952	1.3732	1.50748	4.54592	1.38145	3.1567	3.04068	0
4.96246	1.89712	1.00578	1.76443	3.56788	1.98783	3.58665	4.48864	2.74455	1.82307	2.69296	2.10421	3.44099	0
4.61713	1.76438	0.842815	1.31202	3.39029	2.08521	3.26429	4.59884	2.59271	2.28615	3.02258	2.00812	3.04385	0
0.551023	0.376383	1.94028	0.310964	0.665942	1.39986	0.559657	2.47124	2.33113	2.01193	0.797925	1.31413	1.06167	0
3.94883	2.09212	0.747384	1.1507	3.7918	1.69221	3.79765	4.51342	3.01177	2.178	2.58775	2.50593	2.9161	0
3.36734	0.464754	1.2889	2.11056	1.31466	1.98018	3.21372	3.18042	2.54465	2.68627	2.95994	2.74809	2.55581	0
2.19736	2.40242	1.07189	0.828753	3.97902	2.6878	3.5332	1.51968	2.49782	3.81752	3.70528	2.58693	2.08678	0
0.390283	0.062293	1.16969	0.518869	0.609379	0.822186	2.2323	3.3186	1.68	1.62345	1.23079	1.74759	1.40218	0
4.42962	2.36406	0.668433	1.1507	4.02615	2.06136	3.74498	4.92751	2.90105	2.322	2.73458	2.19453	3.03645	0
3.12888	2.48447	1.09541	1.32778	4.12005	1.50059	3.87486	4.99413	2.97808	2.64148	3.06519	2.53074	2.70334	0
3.9468	2.08382	0.721489	1.12622	3.76094	1.5773	3.76591	4.66386	2.75512	2.06984	2.79767	2.52723	2.82616	0
1.5561	0.796927	2.66652	0.433921	1.34333	1.52676	1.94743	3.36504	3.17763	2.24306	1.40475	2.30524	2.44683	0
4.84101	2.04994	0.479422	1.41562	3.70685	2.03548	3.821	3.95851	3.12663	2.00745	2.57861	2.65574	3.64906	0
4.24741	1.41296	0.449509	0.847939	2.98039	1.753	2.85372	4.56627	2.18843	2.10988	3.02794	1.95728	3.03751	0
1.28797	1.13779	3.69818	0.653049	1.66145	1.56375	2.38807	3.74659	3.91019	2.24425	1.99194	2.67793	2.86776	0
4.6726	1.42591	0.810303	1.12931	3.28535	2.12333	3.45693	4.49815	2.67414	1.99693	3.11591	2.48691	3.55026	0
3.03842	1.72793	1.07528	0.193654	1.03323	4.21505	1.73958	0.50523	1.82165	4.45774	1.71336	3.11051	3.36295	0
4.43575	2.24662	-0.636701	0.708225	3.84069	1.92177	3.72606	4.66738	2.6147	2.18179	3.01123	2.3595	3.30787	0
2.55859	2.47314	1.55324	0.54646	4.14455	3.34807	3.63531	1.61914	2.92205	4.39753	5.71588	3.12517	2.49692	0
4.59365	2.51951	0.681856	1.46983	4.14054	2.07685	4.02927	4.38207	3.15575	2.37666	3.1463	2.4694	3.41371	0
3.39277	3.49304	1.15074	1.5497	5.17172	3.47532	4.78565	1.5929	3.66447	4.52121	4.42377	3.38191	3.06725	0
4.29706	2.69163	0.797925	1.13239	4.33448	1.80326	3.98181	4.59301	3.03114	2.40242	3.15622	2.23863	3.09363	0
4.36144	1.83725	0.785445	0.745372	3.34681	1.68003	3.46829	4.37053	2.75932	2.2092	2.76974	2.31934	3.28165	0
4.55797	1.9771	0.995021	1.15373	3.3156	1.9021	3.25647	4.2872	2.41789	2.07265	2.33962	2.09217	3.27666	0
5.1099	2.25841	1.14755	1.98215	4.0327	2.43051	3.87674	4.97058	2.94959	2.34702	3.07951	2.33645	3.75022	0
4.56545	2.30199	0.604392	1.22986	4.01879	2.20056	3.81727	4.04625	2.89007	2.5742	3.44805	2.42375	3.35372	0
2.04299	0.564533	1.63523	0.21429	0.438723	3.04143	1.53379	2.94037	0.850831	4.18842	3.91307	2.91011	2.58278	0
4.68609	1.91525	0.772862	1.21845	3.17211	2.07965	3.2464	4.18498	2.59188	2.34702	2.67566	2.30305	3.5294	0
5.04989	2.19932	0.830707	1.55184	3.95793	2.36512	3.8905	4.5698	3.10012	2.4014	2.56938	2.5193	3.85459	0
4.54194	3.07646	2.41691	3.17123	4.37942	3.29454	5.65821	4.71449	5.38224	4.10698	3.39312	5.44648	4.86581	0
4.7594	1.78122	0.699588	1.30672	3.42033	2.12066	3.44328	4.65527	2.64251	2.05994	2.59517	2.24212	3.55564	0
3.16681	2.3829	0.622925	0.954377	3.97072	1.20507	3.90223	4.66961	3.0003	2.35237	3.06261	2.36776	2.20302	0
2.78429	1.8087	1.39445	1.86468	3.38922	3.11081	3.07228	3.10728	2.10155	4.27277	4.75586	2.76766	2.60823	0
2.62751	1.70624	1.33611	0.290817	1.3173	3.70092	1.35963	2.80094	2.99313	3.98075	4.51451	2.66422	2.99091	0
2.09918	0.290561	1.85428	0.198821	0.863108	2.99557	1.38661	3.91564	1.27176	4.19288	4.68518	2.84301	2.54896	0
2.75202	2.5186	2.31177	1.1044	4.25521	3.27718	3.88096	1.72206	3.20444	4.33983	5.25905	3.34675	2.86776	0
5.14341	2.7906	1.34154	1.7378	4.49521	2.5104	4.22438	5.18335	3.25983	2.67855	3.75022	2.56347	3.91307	0
4.71094	2.35983	0.126926	1.14463	3.95086	2.31093	3.82249	4.54904	2.96734	2.64549	3.42241	2.46286	3.42852	0
4.07097	2.34055	0.797925	1.33039	3.86526	1.87188	3.77738	4.29943	3.13146	2.5186	3.15857	2.66268	2.99202	0
4.61087	1.85816	0.768645	1.01985	3.35235	2.03984	3.35085	4.62073	2.38811	2.18683	2.37391	2.11479	3.35835	0
4.59429	2.03403	0.262572	1.25512	3.90866	2.08243	3.65484	4.88936	2.92087	2.35451	2.77387	1.81815	3.30707	0
5.27736	2.53302	1.08202	2.01163	4.30775	2.49566	4.07014	4.83925	3.16838	2.47693	3.03539	2.52018	3.88255	0
4.36493	1.72793	1.0022	1.69938	3.34236	2.00145	3.65601	4.79563	3.04805	2.14319	3.1026	2.66345	3.09513	0
5.25401	2.00296	1.20976	2.12058	3.50507	2.45977	3.72169	4.97356	3.01989	2.29974	3.02526	2.59763	3.94097	0
4.53236	1.69623	0.278583	1.05304	3.36625	1.88373	3.66793	4.5802	2.77799	2.00745	2.78005	2.4638	3.36295	0
4.45012	2.26308	0.672919	1.05304	3.9727	2.02082	3.84236	4.47156	3.02633	2.37978	3.256	2.35743	3.14106	0
2.77648	1.84776	1.85428	0.0946586	1.82902	3.92508	1.57054	1.27173	3.32313	4.27182	0.995021	2.95879	3.22793	0
4.66855	2.15233	1.28321	1.50604	3.76777	2.00596	3.48786	4.50806	2.60823	2.21166	2.93269	1.90383	3.38977	0
5.45073	2.52943	1.29737	2.12803	4.30378	2.7416	4.17318	4.76345	3.16092	2.47314	3.1707	2.75231	4.06816	0
3.03135	1.40512	0.973246	0.270554	1.63606	4.12308	1.73183	1.71022	1.74759	4.71763	2.48691	3.29239	3.56068	0
5.28704	2.25841	0.905722	1.64197	3.88016	2.44817	3.88934	4.67965	3.03167	2.2018	2.8913	2.47032	4.01869	0
4.62046	1.81051	0.547674	1.19532	3.60804	2.04562	3.49613	4.55514	2.48049	1.94426	2.59517	2.13821	3.33382	0
2.72006	1.92985	1.15392	0.10514	1.22986	3.86968	1.25989	2.80709	2.8974	3.64453	3.79373	2.36054	2.96564	0
4.63559	3.44147	1.13149	1.48582	5.08302	2.29523	4.6786	5.54332	3.51766	2.95165	3.45645	2.61631	3.47374	0
5.28144	1.6841	0.842815	1.84213	3.3846	2.3209	3.5753	4.27875	2.79363	1.99542	3.08356	2.25941	3.88959	0
0.495595	0.847022	1.77346	1.07577	0.462591	1.13449	0.749498	2.2359	1.47908	2.3373	0.781262	1.87438	1.35767	0
4.79129	2.11528	1.35232	1.42524	3.7937	2.18431	3.72251	5.21334	2.83268	2.322	3.42457	2.20423	3.53812	0
4.62594	2.21533	1.55994	2.11182	3.9855	1.94743	4.1194	4.94622	3.36065	2.34702	3.01014	2.77799	3.44064	0
2.66978	1.13118	1.73441	0.224574	0.863108	3.76434	1.57505	0.922941	1.93247	4.42382	3.14249	3.0734	2.99036	0
2.87533	2.9546	1.76613	1.67297	4.68376	3.17239	4.27229	2.7262	3.19181	4.31651	4.76477	3.02847	2.49873	0
4.81727	2.31427	0.858804	1.26892	3.86438	1.96782	3.5954	4.57332	2.69668	2.37978	3.14439	1.99933	3.48159	0
4.18287	2.01639	1.08873	0.985795	3.76607	1.80689	3.39282	4.45458	2.75442	2.18934	2.96734	2.0496	3.00741	0
1.70865	0.339129	1.58635	0.120839	0.21429	2.99217	0.994891	3.99608	1.48148	4.08149	4.92964	2.70038	2.23629	0
3.66029	2.12467	0.654904	0.749446	3.71611	1.50299	3.52155	4.64432	2.51486	2.15363	2.26398	2.09888	2.63701	0
3.1787	2.07825	1.32791	0.255285	1.71418	4.22371	1.58624	1.81771	3.14106	4.16951	4.14711	2.78686	3.44028	0
4.62666	1.9054	1.12826	1.15976	3.47229	2.14842	3.76958	4.63259	3.01989	2.30199	2.95305	2.60498	3.45715	0
4.8076	1.56602	1.05825	1.66722	3.00982	2.10309	3.36386	4.73957	2.5861	2.10853	3.11444	2.3595	3.47648	0
4.80104	1.6615	0.64127	1.27439	3.24478	2.12467	3.39472	4.86676	2.66805	2.4085	3.52485	2.10951	3.561	0
2.81493	2.80914	2.12396	1.11692	4.52005	3.27847	4.13366	1.41556	3.45854	4.3558	6.02425	3.31352	2.76141	0
5.13712	1.79414	0.995021	1.58133	3.37564	2.34163	3.52523	4.11071	2.81895	1.84077	2.42956	2.45062	3.93968	0
4.73676	1.59732	1.23079	1.35867	3.19649	2.11259	3.09301	3.99274	2.45535	1.82307	2.67034	2.14973	3.31312	0
5.28938	1.25989	1.16655	1.68625	2.98941	2.39322	3.39586	4.6417	2.45911	1.88542	2.86838	2.07863	3.97187	0
2.36049	0.775549	0.50405	0.063158	0.631347	3.49269	1.00224	0.696078	1.2889	4.22967	4.08542	2.85005	2.94901	0
4.31059	2.03403	0.214159	1.27984	3.8029	1.88373	3.59415	4.30816	2.70849	2.37874	2.97188	1.92301	3.00523	0
4.91051	2.44231	0.414127	1.54756	4.03903	2.122	3.83871	4.58991	2.91371	2.33947	2.75161	2.1459	3.64444	0
4.90178	1.92985	0.951109	1.30139	3.54018	2.07685	3.51517	4.45234	2.6472	2.05994	2.61066	2.27866	3.58306	0
5.2368	2.49566	0.725834	1.6653	4.0045	2.43347	3.99232	4.51056	3.02204	2.46361	3.07849	2.379	4.09689	0
3.70582	2.37038	1.09208	1.03655	3.95793	1.58847	3.77114	4.78754	2.85894	2.31093	2.74029	2.25941	2.41299	0
1.93405	0.0566364	1.66191	0.340955	0.375575	2.94216	0.603101	1.8087	1.61636	4.0963	4.22967	2.61147	2.27866	0
2.53314	2.64228	1.08202	1.17173	4.19167	2.94276	3.83627	2.34379	2.741	4.09101	4.27732	2.75372	2.54119	0
3.86593	1.62774	0.645826	0.687217	3.1995	1.70823	3.45121	4.35012	2.67414	2.45011	3.23709	2.4694	2.73315	0
4.34478	2.363	0.772862	1.26617	3.95994	2.08104	3.63681	4.6747	2.78414	2.35557	3.03645	2.02549	2.93738	0
4.67976	2.32859	1.0022	1.41803	4.049	2.02377	3.91406	4.81345	3.12663	2.2311	2.48049	2.52811	3.53393	0
4.87504	2.73942	0.818499	1.54326	4.41914	2.27353	3.95461	4.23082	3.14106	2.69773	3.28207	2.27642	3.64242	0
4.47298	1.82841	0.789617	0.968432	3.58816	2.11123	3.61692	4.49398	2.74667	2.3891	2.74242	2.50772	3.21603	0
4.95825	2.12467	1.13472	2.08381	3.72529	2.22385	3.72852	4.37439	2.7855	2.17926	2.99147	2.4694	3.56131	0
4.74467	2.22021	0.738799	1.59579	3.95652	2.17291	3.7841	4.82234	2.82812	2.36194	2.99036	2.13435	3.48634	0
3.48624	2.54546	0.48437	0.716554	4.14104	1.70025	3.74952	4.49157	2.99699	2.43839	3.10359	2.09217	2.46099	0
2.83609	1.77564	1.55994	0.136509	1.35358	4.00396	1.6213	3.77635	2.94205	4.36608	4.61702	2.9155	3.09762	0
4.45942	1.69422	0.87068	1.51049	3.10183	1.82129	3.70511	4.21321	3.0134	2.3777	2.55752	2.61389	3.2969	0
5.49867	2.18934	1.22482	1.78525	3.73237	2.73942	3.68825	5.10469	2.78686	2.49566	3.11787	2.14845	4.24944	0
2.84345	1.61698	1.54875	0.255285	1.06931	3.99378	1.82307	1.07009	1.7268	4.63919	1.38406	3.21248	3.20265	0
4.57135	2.57249	0.273253	1.08219	4.34245	2.03257	3.91992	4.91537	2.96848	2.42356	3.09212	1.90544	3.42277	0
4.88488	1.96315	0.75166	1.69002	3.6126	2.12734	3.42943	4.40059	2.69668	2.26774	2.76697	2.0962	3.53972	0
4.24997	2.73796	1.06849	1.12313	4.35091	1.78677	4.01404	5.01878	3.04805	2.5049	2.28202	2.2876	2.95822	0
4.69191	2.67545	1.06849	1.30406	4.36118	2.09762	4.17944	4.86702	2.97131	2.47409	2.92679	2.27417	3.35024	0
4.86282	1.28637	1.03403	1.69938	2.85015	2.04994	3.01959	4.11737	2.47957	2.05566	2.74171	1.77893	3.44135	0
4.51107	1.95217	0.580963	1.15675	3.60404	2.05566	3.55479	4.66268	2.81367	2.15622	2.92383	2.33326	3.20444	0
5.08165	1.9771	0.958529	1.39121	3.65975	2.27584	3.63681	4.76991	2.486	2.0866	3.09862	2.04257	3.79821	0
2.13296	0.279673	0.768645	0.193654	0.250182	3.25211	1.48361	1.06312	0.894138	4.42748	2.9981	3.0003	2.41887	0
3.25862	2.29749	1.36565	1.77315	3.95994	3.09352	3.60036	4.50431	2.52018	4.12418	4.23769	2.75302	2.45629	0
0.514235	0.554769	1.76429	0.295865	1.22417	0.736308	1.59732	2.91435	2.12135	1.42848	1.08202	1.21882	1.04447	0
3.77769	2.40445	1.42001	1.67297	4.05412	2.6801	3.75617	4.72198	2.64876	3.83431	4.52679	2.52371	2.70629	0
3.19735	2.24662	1.10535	0.433921	1.90071	4.31075	1.80508	1.78493	3.61333	4.32164	1.18526	3.01827	3.40163	0
0.234836	0.163603	1.15392	0.188482	0.15735	0.397453	0.972585	2.34379	0.806189	1.25989	0.48437	0.764416	0.0165992	0
4.88576	2.00446	0.826649	1.17767	3.70297	2.27353	3.87768	4.60306	3.0881	2.25958	2.79093	2.29204	3.57224	0
4.27019	2.05851	0.459523	0.847939	3.74887	1.92177	3.80776	4.49195	2.94959	2.07685	2.08407	2.49782	3.0449	0
4.42345	1.18939	0.659426	1.38626	2.98994	1.85124	3.44183	5.04832	2.64798	2.02524	2.94727	2.19087	3.0014	0
2.729	1.67183	1.25145	0.305938	1.62413	3.86089	2.03839	1.3732	2.97131	4.31348	0.936147	2.97695	3.0449	0
2.21114	1.96159	1.2775	0.360788	3.42923	2.87498	3.02674	0.569396	2.57527	4.0371	4.94764	2.67566	2.57107	0
3.46836	3.06122	1.54875	2.3436	4.75967	3.4004	4.22818	4.35508	3.28868	4.45748	4.60724	3.2253	2.87338	0
4.59034	1.38126	0.403926	1.39367	3.0354	2.0485	3.40492	4.49233	2.75652	2.08521	2.55667	2.49601	3.32948	0
4.59759	1.85816	0.289218	1.12003	3.42889	2.19309	3.55025	4.43785	2.64094	2.07265	2.66881	2.3626	3.41152	0
4.21138	2.61955	0.618309	1.30406	4.28015	1.87698	3.74739	4.6195	2.74738	2.36194	3.03327	1.82165	2.78822	0
4.80519	1.86333	0.686307	1.50158	3.33001	2.24781	3.41278	4.73599	2.75372	2.2323	2.68322	2.15227	3.47202	0
4.42471	2.16653	1.18216	1.24115	3.70633	1.62345	3.53187	4.24197	2.55752	2.20551	3.03486	2.1459	3.16606	0
4.90358	1.82129	0.518693	1.4926	3.34718	2.15493	3.20136	4.40087	2.42472	1.7775	2.66652	1.96795	3.71771	0
4.33226	2.81727	0.609043	1.10754	4.49779	1.88542	4.11071	4.6284	3.2253	2.5348	2.52195	2.32257	2.9898	0
5.34151	1.81591	0.806189	1.70865	3.4917	2.39936	3.63889	4.45327	2.91071	2.16909	2.84172	2.56262	4.03623	0
4.91059	1.92177	1.66191	1.36878	3.44009	2.37874	3.64453	4.74382	3.00085	2.64549	2.82812	2.49782	3.73793	0
4.23544	2.00745	1.00578	1.36626	3.55803	1.85816	3.40191	4.66097	2.32472	2.44134	3.35256	1.98451	2.9077	0
1.99348	0.564533	1.98152	0.385389	0.678739	3.15325	1.12454	0.813814	1.78436	4.23	4.79698	2.88946	2.59023	0
3.65921	3.0371	1.15709	1.10754	4.71491	1.82841	4.2858	4.45931	3.10359	2.54634	2.47773	2.11479	2.59188	0
4.01576	2.02524	0.595056	0.781666	3.65513	1.59732	3.63621	4.91537	2.77318	2.01787	2.2456	2.17113	2.98702	0
4.96459	2.19559	0.777068	1.87262	3.74065	2.21288	3.66678	4.63535	2.85578	1.95217	2.37493	2.18965	3.64444	0
5.10499	2.17164	1.14436	1.50604	3.78465	2.49659	3.94149	5.20957	2.90287	2.59797	3.57442	2.6596	3.79249	0
3.33676	0.32302	0.913391	1.479	0.844122	1.89045	2.88891	2.91619	2.38407	2.72102	2.79025	2.53074	2.63385	0
4.38901	1.98478	0.712764	1.07898	3.7501	1.65316	3.81253	4.19099	2.87026	2.11932	2.56854	2.38508	3.27791	0
2.56263	2.2359	1.48863	1.95619	3.90866	3.27162	3.47987	3.14403	2.45157	4.3731	5.11966	2.99368	2.48783	0
0.925821	0.00566664	0.203329	0.720703	-0.0315947	1.91688	2.66451	4.04506	2.39813	2.7321	3.07237	2.37595	1.86605	0
0.64006	0.485084	1.266	1.26342	1.16276	1.7775	2.62201	4.2704	2.06352	2.87434	1.03053	2.26625	1.40475	0
3.17079	2.41556	1.25145	1.18946	3.94782	3.01738	3.53452	2.6113	2.53249	4.13765	4.90927	2.92324	2.53511	0
1.30406	0.219239	0.980544	1.12931	0.907666	2.00596	2.81457	2.29974	2.31934	2.80505	0.854823	2.57275	2.73028	1
3.16237	3.27974	1.79694	1.71785	4.94123	3.22638	4.55538	3.00904	3.46686	4.35972	4.58694	3.15009	2.81895	0
5.43224	1.9021	1.03403	1.89453	3.43467	2.65425	3.7701	4.69934	3.19136	2.41254	3.05951	2.76211	4.23896	0
4.54239	1.73764	0.969582	1.19532	3.39524	1.9054	3.43053	4.59896	2.51486	1.85816	2.54896	1.974	3.14914	0
4.72487	1.52676	0.802063	1.35867	3.16281	2.11393	3.4837	4.52772	2.83915	1.85989	3.24401	2.33962	3.48702	0
4.79922	2.0485	1.10535	1.29067	3.73815	2.20674	3.93132	4.98301	2.99589	2.26425	2.90226	2.7725	3.61927	0
4.98598	1.48605	0.781262	1.44423	3.06525	2.16396	3.2055	4.56297	2.34384	2.14057	2.51308	2.0369	3.63603	0
4.54955	2.08521	0.850831	1.12622	3.83298	1.86676	3.80852	5.01495	2.93504	2.49937	3.46375	2.6749	3.41371	0
4.67151	1.53145	0.842815	1.54756	2.88006	1.81231	3.18277	4.82952	2.45723	2.0485	2.69519	2.19209	3.31914	0
4.02238	2.77171	0.886362	0.992678	4.34259	1.94426	4.01588	4.45089	3.20265	2.41856	2.57191	2.31177	2.90408	0
5.5266	1.53612	0.943648	2.0376	3.27188	2.69697	3.60622	4.5518	2.60417	2.41756	3.44875	2.35639	4.13638	0
4.51684	2.40445	0.890255	1.17767	4.11542	2.0485	3.81478	4.38376	2.75722	2.37248	3.39126	2.15859	3.11346	0
4.99807	2.27468	1.35232	2.09408	3.95752	2.27006	3.93487	4.92817	3.1868	2.35557	3.26152	2.56262	3.60524	0
4.74732	2.02082	0.717132	1.21845	3.47229	1.98783	3.40002	4.67986	2.69964	1.96782	2.52811	2.07042	3.49342	0
1.12003	0.949898	2.23043	0.310964	2.49071	1.17029	2.71655	5.84342	2.6711	2.03403	0.987803	1.61	1.9006	0
5.35856	2.22142	1.12501	1.87262	3.87252	2.7053	3.78487	5.00672	2.99091	2.39936	2.98088	2.4666	4.02956	0
4.59748	2.67078	0.56201	1.25234	4.33489	2.11932	4.05395	4.4111	3.01989	2.33838	2.92502	2.19575	3.35527	0
5.48552	1.6213	0.854823	1.8742	3.28535	2.71581	3.09609	4.86221	2.33645	2.3829	3.53587	2.00373	4.17811	0
4.45637	1.50059	1.11522	1.46753	3.11638	1.93788	3.24243	4.73748	2.50233	2.30535	2.8037	2.0962	3.23491	0
4.00909	2.02964	0.882457	0.824885	3.59165	1.80144	3.46227	4.80653	2.77662	2.41656	2.6989	2.19453	2.93972	0
4.41635	2.80709	0.826649	1.40592	4.37599	2.04994	3.96991	4.4211	2.94088	2.3198	2.75302	2.10819	3.16326	0
5.29906	0.867399	1.14755	1.86786	2.39915	2.41455	3.23354	4.93764	2.35431	1.9054	2.87898	2.37288	3.98902	0
0.541888	0.480019	1.60574	0.757564	0.265471	1.3569	0.987497	2.66843	1.40731	2.28843	0.89801	1.53516	1.51679	0
2.59285	1.23887	0.622925	0.15735	1.14767	3.66533	1.45136	0.771237	1.20976	4.15681	1.69975	2.70555	2.91131	0
2.71382	1.77936	1.78977	0.141725	1.62013	3.82645	1.79414	2.00296	3.15764	4.0357	4.4497	2.74455	3.08154	0
1.06931	0.535096	1.44253	0.785647	0.982341	1.84077	2.74741	4.71378	2.13176	2.26541	0.797925	2.43246	1.7268	0
2.11933	1.99391	1.45974	0.429109	3.66999	2.79819	3.07906	2.22142	2.19453	3.86778	5.2975	2.56938	2.30305	0
4.18158	1.85816	0.126926	0.9366	3.59887	1.68613	3.56702	4.30388	2.87525	2.11123	2.5677	2.43727	3.18269	0
4.9598	2.18053	0.818499	1.53027	3.81713	2.13	3.76775	4.52306	2.83462	2.21899	2.74242	2.54551	3.70854	0
1.62413	0.158008	1.09541	0.866875	0.957905	2.35664	2.66765	3.14012	2.46099	2.86151	0.913391	2.52899	2.97695	0
1.61005	0.355153	0.878542	0.229708	0.448299	2.88702	0.895445	2.95872	1.41241	3.90907	3.4951	2.61952	2.22926	0
5.69954	2.31093	1.10205	1.97643	3.93143	4.71844	4.1577	3.89971	3.46063	3.34767	2.94554	4.05922	6.67329	0
2.38097	0.957503	1.57323	0.16255	0.699854	3.5832	1.1044	1.41556	2.13305	4.19749	5.16846	2.87587	2.9167	0
4.55897	2.16653	0.987803	1.30139	3.78609	2.00446	3.76066	4.94226	2.62352	2.37248	3.2891	2.22217	3.38454	0
5.2745	1.61481	0.489307	1.65175	3.17387	2.57934	3.35915	4.71103	2.42277	2.31093	2.65574	2.21384	3.87225	0
4.75251	2.39732	1.02702	1.44188	4.15353	2.14712	3.71675	4.50731	2.92679	2.3198	3.05223	2.04115	3.3972	0
2.41795	2.2323	1.041	1.99348	3.9374	2.6113	3.55123	2.88197	2.57861	3.81827	4.49345	2.53249	2.32793	0
1.35102	0.727454	3.08002	0.551023	2.07863	1.38394	2.20056	3.47005	3.27248	1.86676	1.30857	2.49238	2.28649	0
3.26507	3.23176	1.74008	1.05304	4.92078	3.15951	4.40434	3.12284	3.69269	4.21035	4.41324	3.14772	2.7628	0
4.82508	0.818006	0.609043	1.21559	2.46436	2.27584	2.79819	4.79338	1.59716	1.99239	2.52106	1.61	3.821	0
3.92105	2.40648	0.862773	0.947294	4.01481	2.10172	3.76539	4.96149	3.06467	2.61955	3.04068	2.4694	2.84941	0
4.6858	1.76438	0.429353	1.29067	3.45349	2.18809	3.55382	4.52686	2.83462	2.31538	3.1995	2.45157	3.5528	0
5.34287	2.07825	0.802063	1.77489	3.79867	2.52042	3.47427	4.63182	2.6711	2.2907	3.21115	1.99342	3.95823	0
5.18502	1.77377	1.0129	2.14276	3.33227	2.36828	3.19721	4.57892	2.53074	2.07405	2.49963	1.9006	3.79697	0
1.94886	0.317632	1.70366	0.193654	0.785647	3.1411	1.59952	2.90574	1.61848	4.22056	5.27719	2.91848	2.40212	0
2.73922	2.73503	1.66191	1.50158	4.28669	3.09506	3.93841	2.16396	2.70849	4.27734	4.41109	3.029	2.815	0
1.48582	0.85112	1.70171	0.728968	0.50027	2.47882	1.0942	3.35323	1.50981	3.4605	0.909562	2.33113	2.412	0
4.65602	2.23949	1.09873	1.60396	3.94232	2.02818	3.95287	4.39976	2.96678	2.29974	2.80303	2.4286	3.44946	0
2.64924	2.43741	1.05138	0.245073	4.07867	3.04896	3.7353	2.08936	2.54551	4.1488	5.53914	2.85323	2.7274	0
5.18779	1.81051	0.830707	1.82737	3.52789	2.47976	3.58978	4.59953	2.86462	2.04274	2.29314	2.38407	3.82245	0
5.04806	1.50059	0.995021	1.66914	3.2295	2.35237	3.43528	4.84667	2.6155	2.2335	3.45854	2.45911	3.80734	0
4.19469	1.73764	0.862773	0.817119	3.4775	1.7923	3.432	4.46936	2.57945	2.17291	3.01068	2.19818	3.04385	0
3.79157	2.52132	0.672919	0.840295	4.15946	1.80689	3.92351	4.70776	3.02954	2.61543	3.45993	2.53162	2.50233	0
4.64818	1.51018	0.703992	1.09175	3.16014	2.10036	3.47497	4.52478	2.52106	2.21655	3.12226	2.28537	3.38229	0
5.00959	2.27468	0.699588	1.44893	3.81179	2.34055	3.72661	4.78584	2.8037	2.30199	3.42457	2.13435	3.76903	0
2.22135	1.66357	4.53383	1.26892	2.86342	1.92014	3.54471	3.9206	4.52787	2.41052	2.29425	3.76877	3.87086	0
4.86518	2.07124	0.518693	1.46753	3.66434	2.25958	3.59353	4.53053	2.78822	2.20304	3.27373	2.02978	3.66674	0
4.08436	2.57163	1.06849	1.03987	4.27284	1.90869	4.04288	4.17996	3.29115	2.3777	3.18772	2.43439	2.89862	0
4.53666	1.46138	1.11849	1.53678	3.01859	1.90044	3.48786	4.84051	2.59271	2.13132	3.16232	2.4694	3.42959	0
2.56505	2.53391	1.57102	2.2503	4.17351	3.1643	3.79816	2.21043	2.70629	4.16459	4.21914	2.98312	2.72524	0
2.22248	0.930698	1.05825	0.0473823	0.824885	3.46334	0.771237	0.564533	1.10535	3.94325	3.28124	2.40707	2.39714	0
0.85933	0.386939	0.984178	1.21559	0.582667	1.30369	2.60132	4.31333	1.95728	2.39834	0.48437	2.07316	1.59501	0
2.27524	1.27467	1.56217	0.234836	1.16276	3.41539	1.59952	1.6256	2.83592	3.90315	2.96279	2.58361	2.69146	0
3.07258	3.23221	0.822579	1.22131	4.8381	3.26256	4.39934	2.85633	3.38154	4.40669	4.81059	3.2209	2.72162	0
3.78489	1.88036	0.627529	1.12931	3.51169	1.67389	3.63052	4.75207	3.02794	2.18053	2.68322	2.48325	2.75582	0
4.35916	2.15493	0.627529	1.5259	3.80946	1.84776	3.50093	4.69779	2.77043	2.29636	2.95132	2.17858	3.15056	0
1.48355	0.146805	1.14755	0.265471	0.0789181	2.39527	0.564533	1.64053	0.738799	3.65014	3.60464	2.40112	1.82339	0
4.30534	2.12066	0.479422	1.16276	3.63784	1.85471	3.55285	4.09422	2.59681	2.00446	2.38407	2.04538	2.97864	0
1.92657	1.56375	3.35527	0.982341	2.33252	2.178	2.78154	4.68772	3.80167	3.07541	1.57102	2.82092	2.97526	0
1.22986	0.32302	1.48387	1.75386	1.03323	2.24662	2.78154	3.97097	2.50772	3.00849	2.58693	2.63385	2.49782	0
4.10922	2.20304	1.32791	0.889271	3.76582	1.61046	3.64571	4.18187	2.66728	2.27006	3.11689	2.2186	2.88145	0
4.78665	3.00849	1.10535	1.72333	4.60951	2.25253	4.30968	4.72248	3.23795	2.56731	3.28331	2.26056	3.46824	0
3.01086	2.10581	1.33338	0.21429	1.77141	4.05925	1.63841	1.87017	3.49107	4.33405	0.806189	2.88392	3.30585	0
4.38035	2.52674	0.576242	1.00633	4.06195	1.93307	3.81652	4.3678	2.94727	2.5348	3.09762	2.379	3.23317	0
4.53677	1.26878	0.566766	1.30139	2.95061	1.85124	3.20321	4.80866	2.11611	2.02964	2.81632	2.05659	3.35218	0
4.33185	2.0935	0.331432	1.04976	3.75849	1.7978	3.41353	4.43731	2.64564	1.97864	2.56092	1.86605	3.15293	0
2.51469	2.41656	1.2631	1.72696	4.18528	3.11433	3.6522	1.43871	2.53598	4.14987	4.64941	3.03433	2.42763	0
3.81179	1.5431	0.409032	0.773674	3.30407	1.69422	3.55964	4.28517	2.77593	2.26192	2.52811	2.55496	2.68547	0
5.15442	3.06808	1.44253	2.39249	4.72888	2.41254	4.44811	4.81547	3.57007	2.81794	3.21648	2.84941	3.91373	0
2.37419	2.29523	1.28321	0.64006	3.7646	3.07385	3.45693	1.47871	2.5861	4.1951	5.08678	2.9645	2.64172	0
5.25764	2.31869	0.924816	1.69002	3.97508	2.45688	3.89971	4.47918	2.9542	2.26308	2.84493	2.49873	3.80685	0
2.70404	2.46934	1.41748	0.992678	4.09861	3.21372	3.73151	3.31284	2.62272	4.28111	5.01721	2.92443	2.66728	0
1.27166	0.129967	1.22482	0.793577	0.9366	1.98478	2.39424	1.89546	2.42472	2.94097	1.00934	2.48417	2.49692	0
4.7374	1.87188	1.02351	1.28527	3.47848	2.10309	3.74445	4.90602	3.0306	2.33077	3.38379	2.6542	3.55153	0
1.85829	0.930698	2.39012	1.06931	1.64197	2.81929	1.97402	3.86089	2.37697	3.76039	1.25438	2.40806	2.65883	0
4.94694	2.0528	1.19143	1.50158	3.49873	2.363	3.88609	4.99244	3.03751	2.53837	3.65222	2.86838	3.67658	0
2.94344	2.89704	1.06509	0.999524	4.39825	3.07854	4.08111	3.2464	3.01611	4.13112	4.02266	3.01014	2.61389	0
2.75202	1.8195	1.47187	0.063158	1.65175	3.92709	1.73764	2.20304	3.39572	4.23788	1.19143	2.90649	3.09812	0
1.13546	1.03483	2.70776	0.424288	2.12803	1.0942	2.33947	4.17353	2.96621	1.52911	1.29737	2.10421	1.83206	0
4.45564	2.17673	0.973246	1.31202	3.89398	2.05851	3.79664	4.59622	3.02258	2.322	3.32908	2.50143	3.45191	0
0.840295	0.85112	1.30298	0.95084	1.1138	1.38126	3.08838	3.92127	2.81895	1.92985	0.50405	2.52635	2.36054	0
3.45682	2.80778	2.22335	2.61686	4.39799	3.29496	4.09554	3.64068	2.96961	4.35245	4.54928	3.09812	3.00578	0
3.69148	2.57592	0.958529	0.900337	4.26769	1.76627	4.02745	4.43059	3.16326	2.47124	2.84493	2.40311	2.80237	0
4.20511	2.44719	1.08202	1.5127	3.86637	1.93307	3.81926	4.42028	2.96905	2.47976	2.99258	2.50772	2.97583	0
4.54531	1.57505	0.542873	1.4971	3.08323	1.90705	3.65776	4.44079	2.8037	2.05851	2.75091	2.57945	3.50777	0
4.20401	2.30199	0.636701	1.06931	3.8758	1.77002	3.74819	4.62429	2.797	2.29974	2.84749	2.30195	3.11198	0
4.08294	2.18934	0.36791	0.900337	3.79394	1.78493	3.54373	4.46637	2.81036	2.34594	3.06467	2.14335	2.83138	0
4.99258	3.37322	1.41495	1.7215	4.98013	2.94573	4.58979	4.6382	3.65021	3.44977	4.28816	2.74029	3.84565	0
1.54326	0.480019	1.48148	1.65758	1.13546	1.85816	2.72399	2.96106	2.11479	2.84588	0.609043	2.45157	2.66652	0
2.15247	0.433921	1.48863	0.193654	0.419458	3.39699	1.42074	3.34528	1.79156	4.46337	4.94614	3.09613	2.56516	0
3.51764	2.71057	1.50045	1.70124	4.29232	3.47987	3.83603	5.15942	2.84621	4.55954	4.57024	3.19498	2.88762	0
2.71034	2.06561	1.38667	1.09175	3.52541	3.00681	3.25865	3.74498	2.22572	4.19493	4.28008	2.8097	2.68922	0
1.67106	0.976328	3.1977	0.551023	2.22361	1.36779	2.60549	3.50536	3.35102	2.12734	1.31966	2.37697	2.56601	0
4.78136	1.95689	0.542873	1.24115	3.56013	2.17546	3.25079	4.64291	2.38103	1.95059	2.76141	1.92775	3.33658	0
4.38849	1.80144	1.05482	1.24955	3.50949	1.87017	3.36347	4.26802	2.82092	2.12333	2.7026	2.3215	3.20624	0
4.24952	2.21288	0.681856	0.964932	3.91288	1.85124	3.88678	4.67014	3.05483	2.41254	3.2708	2.40806	3.01665	0
4.44766	1.88205	0.650371	0.914957	3.51576	1.81591	3.47357	4.71103	2.70555	2.16781	2.84941	2.24676	3.12031	0
3.35603	2.19559	0.987803	1.28527	3.61883	2.71357	3.19906	4.64159	2.41299	3.7859	3.78874	2.39313	2.60661	0
4.9643	2.15493	0.969582	1.39859	3.80992	2.3373	3.92037	4.74283	3.14106	2.37874	2.50862	2.60172	3.61482	0
4.55885	1.95532	0.499147	1.43478	3.52727	1.96782	3.43016	4.35056	2.66652	2.10445	2.48141	2.40707	3.4042	0
4.74933	1.68003	0.585672	1.23552	2.99205	2.12066	3.52623	4.40017	2.76904	2.14057	2.86399	2.35743	3.45226	0
4.88607	1.38927	1.01644	1.18946	2.88359	2.13925	3.17382	4.5033	2.4218	1.93468	2.83785	2.16863	3.63106	0
4.61599	2.2335	0.789617	1.13239	3.72985	1.89712	3.63681	4.51192	2.85514	2.14581	2.66114	2.2006	3.30787	0
3.01962	1.50779	0.663935	0.188482	1.17173	4.08949	1.48605	0.515233	1.77163	4.66748	0.958529	3.22134	3.19272	0
4.40907	2.01342	0.686307	1.01649	3.65486	1.94743	3.63352	3.95807	2.40509	2.29862	2.77112	2.06629	3.2973	0
1.52371	0.830512	3.11591	0.761607	2.07212	1.27173	2.43643	3.13718	3.38379	1.81771	1.38667	2.38306	2.52371	0
3.03893	2.52042	1.77346	0.737191	4.17416	3.3951	3.76565	2.11663	2.75582	4.49004	5.44948	3.10161	2.95936	0
4.15038	1.56602	0.717132	0.855543	3.20804	1.64264	3.27119	4.25492	2.44397	1.73377	1.97551	2.01249	2.8526	0
4.90099	2.21043	0.93238	1.42284	3.78633	2.3253	3.75511	5.30697	2.87151	2.41856	3.11591	2.30305	3.63369	0
5.04359	1.62774	1.02702	1.69751	3.33227	2.22869	3.46085	4.88645	2.75231	2.39424	3.25259	2.52459	3.77969	0
3.9725	2.10717	0.699588	1.27439	3.79252	1.70425	3.74712	4.86274	2.96108	2.30982	3.07646	2.51397	3.00578	0
4.50527	1.60172	0.842815	0.957905	3.11871	1.80144	3.19258	4.0167	2.13305	2.07965	2.23746	1.87272	3.0003	0
3.68648	2.45592	1.93247	2.75402	3.90612	3.45156	3.67341	5.0001	2.80237	4.51577	4.92627	3.26364	3.17256	0
3.81248	3.14744	1.41495	1.45361	4.76588	3.59353	4.26037	4.11478	3.06261	4.75041	4.99348	3.38342	3.17902	0
5.02126	1.14436	0.725834	1.44893	2.70964	2.15233	3.13176	4.63568	2.42277	1.99844	2.37288	1.99342	3.67153	0
2.51975	2.6179	0.998616	0.653049	4.11594	2.89204	3.68428	2.56298	2.5677	4.01547	3.63428	2.70186	2.12135	0
2.54307	1.27173	1.43508	0.167746	1.29067	3.65102	1.84427	1.82486	3.11787	4.15005	0.663935	2.8037	2.95593	0
4.04366	2.37352	0.789617	1.6653	3.99659	2.10853	3.94105	4.8287	3.09812	2.34163	3.19995	2.50413	3.31433	0
4.22794	1.50299	0.818499	0.635709	3.17167	2.19808	3.3705	4.36507	2.53772	2.39116	3.42313	2.40112	3.19815	0
4.08737	1.70624	0.806189	0.844122	3.31751	1.79962	3.12084	4.56451	2.17858	2.10581	2.50951	1.85428	2.96734	0
4.31256	2.12867	0.928603	1.40592	3.69253	1.81412	3.54732	4.67152	2.63543	2.25841	2.50683	2.18843	3.24788	0
2.7453	1.7606	1.30018	0.110376	1.27712	3.82447	1.49818	2.13662	2.55153	4.03329	3.82269	2.56177	3.03751	0
4.61599	2.04706	0.419213	1.66338	3.70763	2.1445	3.74659	4.62983	3.029	2.22506	3.06622	2.41003	3.49577	0
4.23285	1.47625	0.513824	0.918588	3.10136	1.63415	3.26516	4.1848	2.38609	2.01935	2.81367	2.1548	2.76835	0
3.02371	1.66977	1.21882	0.209139	1.4971	4.12454	1.45387	1.4336	1.58635	4.5265	0.936147	3.06158	3.27916	0
4.66974	1.8871	0.842815	1.36373	3.6494	1.93948	3.35758	4.19168	2.5113	1.74535	2.53424	1.56439	3.25472	0
4.2665	1.89712	0.403926	1.05304	3.73665	1.88036	3.54045	4.12509	2.76835	2.12066	2.44683	2.05659	3.05379	0
5.42652	1.54772	1.24852	2.12555	2.98039	2.52583	3.10221	5.05275	2.30414	2.06277	2.486	2.00373	4.08895	0
2.79397	1.72402	1.87438	0.255285	1.21845	3.95721	1.38927	0.723009	2.26284	4.23379	4.74264	2.95074	3.24788	0
4.21449	3.06016	0.924816	1.58341	4.67722	2.39013	4.26197	5.15203	3.14582	3.16095	3.58521	2.19939	2.99202	0
3.11265	1.6213	1.82687	0.290817	1.3813	3.99629	1.753	1.48361	3.39052	4.2369	0.921018	3.12031	4.47472	0
4.39371	2.04994	1.09873	0.813221	3.58874	1.72598	3.55447	4.3345	2.91848	2.17164	2.83785	2.30305	3.12663	0
2.83732	1.43616	1.8627	0.209139	1.07254	3.96261	1.45136	1.40774	2.09754	4.57834	3.8328	3.17579	3.14914	0
4.75651	1.05258	0.609043	1.11692	2.36246	2.08382	2.25841	4.4089	1.53516	2.07405	3.22924	1.52371	3.38342	0
2.21342	0.612621	1.33611	0.300905	0.904007	3.38556	1.30369	1.46636	1.49574	4.51751	4.18419	3.02526	2.59106	0
4.80656	1.26878	0.886362	1.20694	2.7719	2.07405	2.9593	4.50431	2.40112	1.83372	2.52986	1.92775	3.51141	0
2.07733	0.480019	1.71914	1.60803	1.48808	1.60391	3.29202	3.66822	2.89313	2.70152	2.9077	2.73172	2.44588	0
2.44097	1.21747	1.17594	0.280699	0.907666	3.6519	0.847022	1.3705	1.70755	4.35173	2.11347	3.00632	2.94901	0
4.10001	1.71615	0.695173	0.851746	3.31254	1.55462	3.29957	4.07265	2.60335	2.26425	2.94147	2.13435	3.13914	0
4.651	1.96159	0.538059	1.18358	3.58203	2.01787	3.49338	4.75958	2.79228	2.19059	2.63858	2.18843	3.4278	0
2.08896	0.444243	1.85089	0.50959	0.48151	3.21554	1.65942	1.64896	1.42001	4.37809	4.72729	3.06622	2.42277	0
2.95554	2.34271	1.21882	1.65758	4.10991	2.82734	3.64867	4.18308	2.69593	3.83456	4.07344	2.46193	2.48325	0
4.8345	1.85989	0.777068	1.10125	3.41377	2.11259	3.13028	4.28704	2.28202	2.17036	2.97695	1.77711	3.46548	0
3.66865	2.39936	0.734489	0.773674	4.0751	1.72793	3.79486	4.68949	2.96393	2.61708	3.11542	2.37391	2.67869	0
3.96674	1.96471	1.97551	2.87415	3.71995	3.30207	3.47672	5.16591	2.22808	4.33152	4.93204	3.04752	3.24487	0
3.91603	4.13674	1.86438	1.76793	5.78132	3.73719	5.33795	2.86859	4.30742	4.83728	5.62183	3.76289	3.34908	0
4.86225	1.52441	0.278583	1.18653	3.15208	2.13397	3.18558	4.76577	2.71945	2.08382	2.31286	2.28649	3.6163	0
3.8373	1.80326	0.91721	1.08219	3.3677	1.36508	3.44653	4.51714	2.81102	1.96627	2.61228	2.30742	2.81301	0
2.56586	0.301415	2.0008	0.424288	0.395168	1.22669	0.454521	0.520217	0.708384	2.02671	0.538059	0.905722	1.90383	0
5.11301	2.77241	1.49809	1.69938	4.2929	2.63341	4.19339	4.88543	3.12614	3.13914	3.81565	2.5861	3.91814	0
5.60984	1.35963	1.11522	1.88676	3.13118	2.70152	3.03057	4.77509	1.92459	2.1353	3.32512	1.99638	4.29603	0
5.10076	1.7122	1.52371	2.41515	3.33076	2.32968	3.14646	5.01405	2.2006	2.2941	3.18498	1.84919	3.78473	0
3.9539	2.33077	1.0022	0.922209	3.90676	1.96627	3.88446	4.31606	3.11248	2.55776	3.11149	2.47403	2.92146	0
4.83651	1.55002	0.777068	1.45127	3.11078	2.2941	3.71619	4.43234	2.96222	1.96471	3.09162	2.66422	3.68439	0
0.813221	0.687003	1.15392	0.495595	0.892969	1.13449	3.26861	4.74579	2.90347	2.03111	0.854823	2.64329	2.04398	0
5.52618	1.96159	1.30578	2.14763	3.59973	2.62201	3.60959	4.44996	2.83915	2.28843	2.44111	2.3626	4.23224	0
4.37519	2.10988	0.542873	1.26066	3.59396	1.7923	3.50808	4.66801	2.797	2.2359	3.17163	2.21979	3.1868	0
2.06951	1.79046	2.60254	1.4971	2.49675	2.16524	3.34128	4.47415	4.40056	2.78364	1.2889	3.23535	2.57527	0
4.30078	1.91525	0.59973	1.0299	3.53834	1.66357	3.25691	4.52601	2.39514	2.30087	3.19362	1.89247	3.21248	0
2.72831	2.52132	1.78255	2.48025	4.14472	3.22233	3.71537	3.24507	2.62032	4.25989	4.72513	3.02419	2.6711	0
5.45924	1.40249	0.672919	1.69002	3.07888	2.63906	3.56382	4.28658	2.82027	2.20551	3.1463	2.5113	4.1513	0
4.35565	2.06843	1.07865	1.479	3.77166	2.02671	3.66039	4.52907	2.91071	2.18305	3.17209	2.18105	3.09713	0
5.2685	1.90705	0.725834	1.71418	3.61203	2.51588	3.64719	4.46715	2.92739	2.0866	3.02258	2.40509	3.88596	0
4.83484	1.14763	0.943648	1.39121	2.78299	1.94584	2.93438	4.60283	2.24096	1.91525	2.93679	2.13176	3.49611	0
4.57863	1.78493	0.91721	1.69751	3.54079	1.63202	3.60128	4.7349	2.72812	1.97556	3.05795	2.44111	3.33461	0
3.78274	2.04274	0.842815	0.885563	3.64088	1.82307	3.36933	4.46115	2.42666	2.55075	3.61601	2.3657	2.63937	0
0.828753	0.413146	2.25713	0.270554	1.16576	1.42591	1.47871	3.48682	2.80437	2.25958	1.09873	1.74759	1.25438	0
4.82483	2.2092	0.772862	1.40348	3.8782	2.18053	3.55803	4.3545	2.71654	2.16781	2.82747	2.06352	3.52681	0
4.75224	1.48605	0.547674	1.23269	3.0015	2.06277	3.23086	4.4735	2.47311	2.31093	3.0881	2.37798	3.48125	0
5.37133	0.805394	0.901871	1.78008	2.52731	2.41153	2.81929	5.09202	1.9465	2.08798	3.0003	1.63315	4.09726	0
4.50713	1.85989	0.866732	1.29067	3.53834	1.85124	3.5832	4.29542	2.78822	2.29184	2.34173	2.41299	3.42673	0
4.57895	1.94743	0.936147	1.58548	3.64143	1.99542	3.5854	4.77087	2.84429	2.31538	3.26364	2.37493	3.30057	0
5.03259	1.8871	0.954824	1.52809	3.60604	2.26425	3.56382	4.41837	2.67338	2.21533	2.87276	2.51397	3.64618	0
4.48753	2.28957	1.29455	1.50381	3.97725	2.09625	3.74472	5.07162	3.00414	2.28387	2.5761	2.34699	3.21293	0
2.96642	2.42754	1.78617	2.51384	3.99019	3.35323	3.58947	2.77593	2.60498	4.46389	4.94952	2.96108	2.80504	0
2.95226	1.98935	1.78074	2.32132	3.61939	3.14305	3.21826	2.82131	2.37186	4.21001	3.87546	2.92027	2.71216	0
4.74741	2.27699	0.523552	1.35102	3.94843	2.22021	3.79333	4.96268	3.111	2.26192	3.15528	2.18228	3.63135	0
1.49934	0.805394	1.50748	0.95084	1.22131	2.19932	2.88828	1.73958	2.73243	3.06544	1.44994	2.72017	2.66498	0
2.85982	1.51256	1.041	0.126066	1.28256	4.0682	1.59511	1.21439	1.67401	4.65322	1.12176	3.22046	3.34908	0
2.77517	1.81412	1.48148	1.94296	3.5983	2.95989	3.19072	3.12134	2.28649	4.07996	4.17743	2.8242	2.6937	0
4.04936	2.30199	2.21979	1.14767	3.91624	2.05851	3.79994	4.82325	3.36982	2.7173	3.50645	2.64094	2.982	0
4.91824	2.12467	0.793777	1.25234	3.69306	2.22142	3.25386	4.87855	2.47218	2.25017	3.0338	1.79156	3.50079	0
3.64611	2.76959	0.943648	0.9366	4.47658	1.94426	4.11108	4.7345	3.10804	2.59965	2.46847	2.44397	2.80237	0
5.02901	2.36406	0.87068	1.3788	3.96514	2.37352	3.91496	4.71662	3.18817	2.3513	3.04909	2.52106	3.77234	0
4.62336	2.18179	0.822579	1.12003	3.6535	2.08243	3.60159	4.44652	2.70702	2.14973	2.83656	2.25368	3.38342	0
5.63517	2.22264	0.708384	2.03219	3.95208	2.75963	3.6522	4.95664	2.46474	2.45785	3.32988	2.06767	4.17079	0
4.35294	2.27237	0.797925	1.28797	3.93843	1.82841	3.81303	4.70119	3.01827	2.25606	2.82682	2.54292	2.98424	0
4.42861	1.81412	0.39881	1.36626	3.55533	1.76815	3.4083	4.31953	2.45346	1.84427	2.78278	2.32042	3.15764	0
4.99586	2.13	0.862773	1.79891	3.78106	2.40445	3.83578	4.89191	2.87649	2.3242	2.379	2.40806	3.80068	0
1.06283	0.197056	1.34963	1.21559	1.22417	1.62345	2.7365	4.38912	2.17858	2.60215	1.94028	2.44873	2.04538	0
4.51037	0.696078	0.738799	0.996105	2.0928	1.89546	2.53659	4.1313	2.03548	2.10988	3.21648	1.89573	3.17302	0
5.36598	2.21043	0.830707	1.95327	3.76338	2.51497	3.97375	4.61536	3.0258	2.21899	2.85894	2.69742	4.02285	0
5.05802	2.178	0.810303	2.07212	3.57055	2.34055	3.82447	4.9303	3.00687	2.34594	3.23274	2.51308	3.86276	0
4.74512	2.27353	1.00934	1.51049	3.75258	2.13662	3.73476	4.8163	2.797	2.27928	3.15293	2.27078	3.42888	0
2.38579	0.740717	2.50143	0.670218	1.55184	3.10728	1.70025	3.40642	2.57023	4.01261	1.33065	2.70112	2.82289	0
4.75868	2.3891	1.00934	1.35102	4.02333	2.22506	3.71399	4.84453	2.92561	2.41856	3.26786	2.29314	3.51602	0
5.1137	1.7122	1.13794	1.44423	3.3285	2.20797	3.05431	4.50054	2.23512	1.96315	2.58775	1.78617	3.55216	0
5.04989	1.90375	0.533235	1.48355	3.59396	2.39116	3.77687	4.8976	2.82616	2.10717	2.98702	2.61711	3.81638	0
4.55188	2.13265	0.846829	1.10125	3.72071	2.12867	3.76355	4.56474	2.8913	2.34594	2.9071	2.26398	3.10557	0
4.99222	1.72988	1.10205	1.54541	3.46211	2.3242	3.45622	4.51652	2.93269	2.33838	2.83721	2.40806	3.78599	0
4.26087	1.93468	0.806189	1.01649	3.48688	1.66564	3.47287	4.05611	2.6596	2.08521	2.96678	2.15985	3.04227	0
1.80736	0.915141	2.98479	0.687217	2.07863	1.51968	2.42455	3.65484	3.38454	1.96159	1.53288	2.43439	2.68997	0
5.27402	1.5929	0.9769	1.81741	3.27665	2.56818	3.27205	4.98301	2.39213	2.10988	3.22881	2.0962	3.94633	0
2.06426	0.295992	1.68795	0.486215	0.591613	3.09301	0.998573	1.28345	1.24852	4.3153	4.97545	2.95879	2.66114	0
5.66404	1.41035	1.14755	2.28165	3.07452	2.72842	3.0925	4.83404	2.44015	2.08243	3.31151	2.15227	4.37023	0
4.43438	1.69221	0.743098	1.02321	3.40856	1.86333	3.25123	4.53844	2.2269	2.03403	2.92561	1.87106	3.21736	0
4.70075	1.90375	0.48437	1.22702	3.49138	2.16524	3.61327	4.43355	2.98591	2.21899	2.81961	2.49873	3.4491	0
4.83609	1.3151	0.59037	1.22986	2.7719	2.10581	3.29873	4.16	2.83656	1.93307	2.66191	2.50683	3.5091	0
4.17351	1.50779	1.12176	0.940174	2.8562	1.78677	3.35639	4.07381	2.55153	2.04562	2.84429	2.45535	3.24573	0
5.01736	2.00446	1.80228	1.48582	3.71021	2.37143	3.67399	4.84158	3.05327	2.2359	3.17717	2.59023	3.74918	0
2.17279	1.94426	1.37358	0.716554	3.58583	2.80231	3.19443	1.00224	2.46193	3.87721	4.48251	2.68847	2.07042	0
3.14305	3.06386	1.87935	0.870632	4.69432	3.38056	4.21922	2.65187	3.17902	4.41591	5.57284	3.17441	2.79969	0
3.47196	3.02179	1.34963	1.50381	4.71482	3.61905	4.17753	3.71647	2.94321	4.6382	4.36363	3.43638	2.93328	0
4.92942	1.60172	1.38927	2.20197	3.16059	2.33186	3.61327	4.67934	2.77043	2.41756	3.10706	2.6596	3.69379	0
4.80147	2.41254	1.14116	1.31993	4.00315	2.27353	3.93598	4.68678	3.1026	2.46839	3.07798	2.52371	3.65222	0
3.3457	1.27761	2.34384	1.479	2.46347	3.38056	2.55163	5.39772	3.09112	4.43945	4.93586	3.07135	3.04595	0
2.61072	2.43938	1.20672	0.733085	4.10905	3.10373	3.67427	2.10853	2.77181	4.30311	4.73363	2.99479	2.64329	0
5.11699	1.73958	0.962223	1.8742	3.25009	2.31205	3.25691	4.82643	2.24792	2.05994	3.03007	1.8005	3.69076	0
2.5096	2.25489	0.730168	0.532711	3.94802	2.62201	3.32023	2.79819	2.3657	3.64157	4.15495	2.3626	2.25253	0
5.11996	1.5773	0.542873	1.63408	3.15925	2.3373	3.25473	4.94267	2.45346	2.33838	3.17024	2.13821	3.86485	0
1.66338	0.257802	1.11194	1.11067	0.925821	2.10581	2.81253	3.15422	2.2809	2.91313	0.695173	2.70112	3.05223	0
1.95765	1.25989	1.18835	0.239957	0.95084	3.0096	0.847022	3.87838	1.96491	4.1436	4.08263	2.80036	2.53424	0
2.59754	2.51406	1.56882	0.699854	4.21946	3.08166	3.77401	1.48361	2.97639	3.99316	5.45309	2.85768	2.63385	0
2.94841	2.76675	0.764416	1.00293	4.40097	2.76959	3.94237	2.9546	2.94321	3.91992	4.55103	2.78686	2.58111	0
5.20424	2.09074	0.909562	1.77315	3.84047	2.27468	3.93421	4.66823	3.11346	2.14319	2.69146	2.73815	3.9082	0
4.59631	1.47871	0.0773894	1.07577	3.1298	1.87188	3.0012	4.21153	1.60146	1.64686	1.97701	1.62479	3.14487	0
2.77844	2.7053	1.66191	0.54646	4.26975	3.22593	3.88841	2.03694	2.85831	4.32809	5.46022	2.93679	2.59517	0
5.34955	1.75871	0.826649	1.58962	3.26507	2.53926	3.47742	4.62961	2.78005	2.30199	3.51339	2.47403	4.11041	0
4.43949	2.81997	0.901871	1.21271	4.40894	2.12467	4.34175	4.85155	3.34675	2.44622	3.4641	2.87213	3.35604	0
4.56315	2.47314	0.734489	1.23552	4.01405	2.0149	3.86849	4.8081	3.01773	2.43741	2.85196	2.53511	3.29033	0
4.43112	2.50122	0.576242	1.14463	4.11594	1.97247	3.8489	4.81428	2.83397	2.21411	2.98312	2.16237	2.9992	0
0.925821	0.554769	1.2158	1.48808	1.20983	1.65942	2.46743	4.32074	2.16488	2.76888	0.806189	2.39714	1.59501	0
5.01931	1.72793	0.760175	1.25512	3.14214	2.2907	3.20367	4.59998	2.55153	2.1445	3.02365	2.00373	3.44417	0
4.55066	0.96883	1.06167	0.828753	2.47234	1.76249	3.27205	4.52416	2.78005	1.88373	2.67034	2.3215	3.46755	0
5.57583	1.70624	1.39704	1.84213	3.50349	2.71431	3.6248	4.57717	2.85196	2.09074	2.60579	2.43053	4.2693	0
4.17172	1.68613	0.958529	1.26342	3.39383	1.7775	3.47041	4.09082	2.51841	2.10988	2.95363	2.11084	3.02633	0
4.48528	2.09899	1.0022	1.05304	3.90887	2.03548	3.5791	4.87726	2.81367	2.30311	3.10557	2.17734	3.1868	0
5.28683	1.59069	1.20672	1.90991	3.30446	2.41856	3.42612	4.66471	2.87649	2.17036	3.15481	2.34909	3.84825	0
5.09478	2.70907	1.13472	1.61005	4.29892	2.41856	4.28922	4.61311	3.30301	2.4807	2.49511	2.8017	3.79672	0
5.00896	2.16781	0.890255	1.57299	3.88731	2.21655	3.86351	4.77509	3.07849	2.19559	2.08271	2.64172	3.73079	0
3.68013	1.97556	0.331432	0.769662	3.60747	1.74535	3.55576	4.5159	2.82551	2.34055	3.02042	2.42375	2.66345	0
3.76729	1.21129	0.50405	0.695652	2.79653	1.54541	2.81186	4.60078	2.13435	2.15751	3.02096	1.72106	2.57275	0
4.37546	1.31226	0.87068	1.25789	3.10278	1.96471	3.47111	3.94193	2.66575	2.10036	2.98647	2.5541	3.14962	0
2.27202	0.830512	2.32793	1.18946	1.7215	2.99103	2.29297	3.36816	2.82616	3.97694	1.551	2.95879	2.72307	0
4.72159	1.21439	0.681856	1.48582	3.02983	1.87358	3.33606	4.26101	2.4694	2.07825	2.83592	2.329	3.30382	0
2.55696	2.61378	1.62479	0.569168	4.20307	2.78851	3.82125	1.2419	3.09162	3.7877	5.35793	2.7855	2.60985	0
2.32744	1.90044	4.30936	1.27984	2.86701	2.13925	3.35797	4.4357	4.48326	2.73063	2.7353	3.25558	3.54037	0
2.53729	2.58531	1.62059	2.06689	4.16209	3.03655	3.76197	2.82868	2.72956	4.1784	5.01155	2.9321	2.46753	0
4.94521	2.38497	0.595056	1.67297	4.02558	2.34594	3.67427	4.82425	2.9321	2.45688	3.19905	2.4286	3.6401	0
4.12227	2.34916	1.02702	1.03655	4.07581	2.09212	3.84479	5.16111	2.97808	2.44524	3.33146	2.36776	2.84941	0
5.02563	2.0528	0.557243	1.59988	3.75085	2.26308	3.44797	4.54604	2.46099	2.18809	2.40212	1.96187	3.82824	0
1.89763	1.03483	3.17579	0.678739	2.41515	1.65525	2.67389	4.308	3.74055	2.47219	0.998616	2.67186	2.76558	0
4.5318	1.76815	0.797925	1.05957	3.54566	1.81591	3.34128	4.30907	2.5677	2.17419	2.90044	2.10288	3.33422	0
2.57227	2.54546	0.632121	0.821007	4.13348	2.89392	3.72497	2.01639	2.70038	4.15929	4.30772	2.95535	2.55325	0
2.0851	1.42848	4.03896	1.05957	2.48462	1.73764	2.92411	4.19834	4.16359	2.47314	1.986	3.31433	3.44664	0
3.94068	2.16781	0.48437	0.961423	3.72554	1.76249	3.65893	4.57308	2.81895	2.43544	2.77181	2.28871	2.82747	0
4.55199	2.00446	0.645826	1.30672	3.75652	2.03984	3.70567	4.22272	3.05327	2.36406	3.30585	2.49873	3.28786	0
2.54307	1.53612	1.42757	0.365726	1.06931	3.74177	1.71813	2.1445	2.93269	3.98582	4.15789	2.79161	2.92205	0
4.81531	2.04562	0.894138	1.38626	3.54626	2.25371	3.59353	4.7252	2.7635	2.22385	3.23709	2.28202	3.62783	0
2.83485	2.38704	0.609043	0.560116	3.96654	1.50779	3.79562	4.27907	2.83915	2.54723	3.00632	2.24792	2.45346	0
5.15192	1.57054	1.06509	1.65758	3.17255	2.33622	3.42759	4.46936	2.68096	2.1445	3.40126	2.3657	3.92603	0
4.88329	2.01044	0.730168	1.26342	3.63367	2.19683	3.5832	4.99205	2.61711	2.26774	3.15151	2.22454	3.58766	0
4.98792	1.48605	0.846829	1.50827	3.01551	2.02377	3.4605	4.49714	2.69964	1.9054	2.731	2.39614	3.6673	0
0.59607	0.805394	1.34154	1.02321	1.1138	0.96883	1.72009	3.32554	1.39445	1.19254	0.362727	1.37358	0.632121	0
2.93175	1.81051	1.2158	0.0894141	1.64197	4.10287	1.81591	0.994891	3.02419	4.26484	0.913391	2.95936	3.14772	0
3.93473	1.00956	3.47168	0.866875	2.53231	4.0385	3.13373	3.72879	3.9345	2.87753	1.63315	3.51996	5.81093	0
4.34245	1.76627	1.00934	1.07254	3.50032	2.02082	3.6374	5.01383	2.89007	2.19932	3.22793	2.58444	3.29198	0
2.93845	2.05851	2.0538	0.234836	1.53244	4.09271	1.9021	3.35876	3.1909	4.30663	4.24024	2.96621	3.3641	0
2.48723	2.62528	1.34154	1.81741	4.24816	2.73942	3.82224	2.46839	2.8526	3.88748	4.1713	2.73601	2.27978	0
4.71066	1.99844	1.08538	1.39367	3.4654	1.94267	3.38862	4.68647	2.59188	2.31427	2.31827	1.87106	3.41444	0
5.19014	1.37858	1.363	1.63408	3.07452	2.33295	3.29454	4.74234	2.70481	2.38082	3.57411	2.40509	3.84589	0
4.25357	2.32859	1.17594	0.985795	4.03345	1.94584	3.89558	4.26197	3.14962	2.60132	3.34168	2.58444	2.96791	0
2.0376	0.554769	0.943648	0.10514	0.600517	3.27718	1.29217	0.788412	1.47428	4.3629	4.91017	3.02311	2.74242	0
4.89265	1.92985	1.31966	1.48582	3.56788	2.2323	3.48924	5.02372	2.48049	2.58446	3.67406	2.1395	3.63223	0
4.59653	1.08048	0.650371	1.17173	2.6403	1.9054	3.21008	4.40793	2.57778	2.0485	3.19317	2.32257	3.2178	0
5.05601	1.67594	1.02351	1.85668	3.33114	2.36617	3.72988	4.40101	3.00741	2.14188	2.37798	2.82158	3.69763	0
1.00293	0.252314	0.57151	0.10514	0.115609	2.15363	1.0132	0.257802	0.57151	3.2331	3.74658	1.86438	1.73061	0
1.72515	1.1735	3.1781	0.836458	2.11808	1.96003	2.68704	4.80755	3.81906	2.93438	2.09888	2.47496	2.60091	0
4.78735	2.12467	1.10865	1.54756	4.002	2.23949	3.64216	5.03712	2.84493	2.41254	3.36181	2.26852	3.38753	0
5.4384	1.69824	0.894138	1.73059	3.41826	2.65584	3.45586	4.76789	2.60985	2.15233	3.32908	2.25941	4.03212	0
2.23035	0.822186	1.71143	0.146937	0.622592	3.44653	0.998573	2.6924	1.80228	3.91902	4.84704	2.6937	2.79025	0
4.77525	1.90375	0.627529	1.53027	3.73136	2.01342	3.64749	3.77531	2.87649	1.92663	2.45629	2.46753	3.24916	0
2.76597	2.82198	1.68199	0.724841	4.42193	3.16526	3.95461	1.53379	3.01719	4.23625	5.09407	3.02794	2.73172	0
3.04294	1.58401	0.830707	0.229708	1.38626	4.27608	1.50059	2.39322	1.73819	4.74628	1.33338	3.26279	3.50777	0
2.97074	1.47871	1.90221	0.350888	0.985795	4.0167	1.5929	1.20507	1.85766	4.41508	4.0945	3.18131	3.20713	0
4.03009	2.56904	1.30298	1.33817	4.23712	2.04994	3.93951	4.49827	3.11297	2.6326	3.669	2.32472	2.92324	0
2.36932	2.11528	1.8005	1.6653	3.90993	3.14744	3.5635	2.61543	2.46567	4.15379	4.91131	2.86021	2.21503	0
4.84384	2.178	0.958529	1.09493	3.43671	3.35085	5.4876	4.24033	4.64951	3.94632	2.86713	4.91213	4.82339	0
2.69275	2.69393	1.22182	1.59784	4.36493	3.1093	3.90839	2.50122	2.88516	4.22686	4.47963	2.99534	2.59517	0
4.77898	2.34163	0.585672	1.55397	3.97843	2.30423	3.83014	4.87475	2.92443	2.36722	2.55325	2.51664	3.56225	0
4.80121	1.5929	0.909562	1.3459	3.05935	2.08798	3.44291	4.45458	2.61389	2.3777	3.36525	2.5481	3.60072	0
2.3456	2.12734	1.8286	0.528107	3.61061	3.26256	3.20458	0.677878	2.0962	4.3561	5.68279	3.15622	2.56685	0
4.78489	2.02524	1.32242	1.4324	3.63867	2.18934	3.58665	4.76818	2.8077	2.44329	3.3022	2.50862	3.57998	0
2.7426	2.93558	1.78797	0.741287	4.42622	3.37941	3.9654	3.00849	3.87363	4.42883	4.88932	3.24185	2.62352	0
4.53406	2.41354	1.03053	1.63011	4.09265	1.87358	3.78023	4.70991	3.02204	2.29184	2.47681	2.2269	3.16326	0
1.97213	1.28053	3.88642	0.954377	2.49848	1.77377	2.96922	4.26675	3.94953	2.3777	2.11216	2.80303	3.08103	0
1.77836	0.386939	1.041	0.0105331	0.424288	3.01294	1.16386	2.55513	1.2775	4.02543	4.74649	2.71799	2.33113	0
3.76436	2.67	0.854823	1.3173	4.2304	1.9771	3.97757	4.49587	3.10656	2.65821	3.22001	2.32042	2.74667	0
3.97528	1.75491	0.810303	0.773674	3.49042	1.67798	3.37709	4.25877	2.75161	2.06419	2.21741	2.52547	3.05066	0
4.81761	2.14581	1.12826	1.68814	3.69122	2.13925	3.62782	4.29804	2.56685	2.47314	3.44382	2.31934	3.60974	0
4.29692	1.8195	0.64127	1.00633	3.38674	1.86847	3.24287	4.52293	2.30524	1.81412	2.22098	1.76797	3.04385	0
2.01578	0.953706	2.08813	0.0946586	0.591613	3.16191	1.68613	4.22686	1.95575	4.34763	4.86008	2.94379	2.30195	0
2.65882	2.36512	1.68199	0.687217	4.07223	3.0135	3.66649	1.93788	2.94554	4.13184	5.31015	3.03433	2.7628	0
1.49485	0.333768	1.22781	0.16255	0.229708	2.85503	1.45638	4.9177	1.58852	3.97162	4.39538	2.66498	2.4286	0
5.26054	1.74343	0.747384	2.07603	3.48656	2.61378	3.86351	4.75442	3.05171	2.41856	3.43424	2.80837	3.92493	0
1.13546	0.574248	1.51679	1.91752	1.26342	2.11528	2.63745	3.27033	2.4041	2.99046	0.9769	2.60091	2.35639	0
4.86672	1.91525	0.858804	1.77141	3.65541	2.19683	3.50706	4.75607	2.68322	2.55075	3.58796	2.26056	3.708	0
4.82356	2.11663	0.806189	1.61812	3.61572	2.13397	3.66359	4.82425	2.94785	2.18431	2.59517	2.2398	3.65107	0
2.41141	2.36828	2.20904	3.27824	4.0512	2.95872	3.678	2.57592	2.73172	4.08759	3.92165	2.78141	2.28314	0
1.60396	0.903357	2.36467	1.72333	1.33817	2.53123	2.05851	3.61814	2.59681	3.58383	1.44994	2.50233	2.59023	0
3.04844	1.70425	0.9769	0.495595	3.34977	1.45387	3.51686	4.53468	2.75932	2.22989	2.41789	2.41789	2.15733	0
3.18176	2.03548	1.83551	0.203982	1.82406	4.26563	1.91851	1.91362	3.12031	4.36794	4.92128	3.10656	3.59071	0
1.39859	1.56375	2.0369	0.555575	2.69488	1.09761	2.64549	5.9939	3.07697	2.08798	0.738799	1.881	1.5666	0
1.25512	0.626808	1.89573	0.280699	1.30406	0.826355	1.19569	3.43419	2.50862	1.74535	0.958529	1.57762	1.40475	0
4.42723	2.20797	1.041	1.14767	3.78943	1.94426	3.56734	4.2431	2.87836	2.30871	3.15198	2.25713	3.22398	0
5.3598	1.55462	0.874616	1.6498	3.21693	2.57163	3.3705	4.86571	2.64876	2.07685	2.54119	2.26738	4.03799	0
4.59971	2.04994	0.721489	1.37631	3.6494	2.1353	3.62872	4.5985	2.78618	2.30647	3.20624	2.47681	3.39609	0
2.70053	1.38927	1.23376	0.355843	1.63408	3.87322	1.61698	2.18683	2.75652	4.39878	1.37358	3.02096	3.11198	0
4.26532	2.13265	0.34712	0.985795	3.68833	1.63415	3.50161	4.43758	2.48049	2.01044	1.87438	1.82687	2.83915	0
4.46186	1.57054	1.14755	1.22417	3.04094	2.16267	2.92835	4.49676	2.35431	2.3777	3.33776	1.97701	3.20847	0
1.54326	0.83879	2.68697	0.678739	1.83559	1.41815	2.41153	3.89281	3.1707	2.12867	1.23969	2.01973	2.28202	0
4.04088	1.50779	0.905722	0.749446	2.98358	1.59069	3.0858	4.49106	2.06629	1.95375	2.26398	1.78074	2.90408	0
2.55778	1.51494	0.882457	0.239957	1.54756	3.75537	2.41254	2.93798	3.02258	4.12014	3.9752	2.92383	3.08407	0
2.67701	2.58616	0.936147	0.537305	4.14405	3.15518	3.72306	2.35664	2.74384	4.31787	5.09359	2.93913	2.84621	0
3.86945	1.85644	1.23969	1.93852	3.59078	1.85471	3.66591	4.89438	2.75582	2.28387	3.13531	2.31719	2.75161	0
5.44388	1.89045	1.06167	1.69377	3.67561	2.7321	3.72333	4.30617	2.97976	2.19309	2.7635	2.52018	4.09394	0
2.69204	1.66771	1.20063	0.120839	1.58341	3.86446	1.72988	1.21129	3.20085	4.12454	4.40557	2.8057	2.96848	0
5.40128	1.45387	0.747384	1.63011	3.28378	2.62528	3.39775	4.59587	2.55581	2.03111	3.2147	2.21384	4.07099	0
4.83559	2.91005	2.81763	2.2514	4.09371	2.84785	4.98044	4.67681	5.29943	3.34128	3.18131	4.56622	4.35727	0
5.12686	2.47882	1.24852	1.79891	4.1355	2.34055	4.10343	5.17068	3.11395	2.41354	2.69816	2.48233	3.89411	0
3.02013	1.93948	2.60091	0.239957	1.59988	4.2127	1.91525	2.82467	3.48668	4.16406	4.90256	3.13675	3.40015	0
3.89547	2.3231	2.4041	3.12612	3.53957	3.54862	5.01691	5.37924	4.76411	4.65968	5.17799	4.92338	4.31912	0
5.34136	2.72473	0.686307	1.99629	4.38429	2.57076	4.20089	4.88131	3.1026	2.46839	3.31272	2.75652	4.04808	0
4.84525	1.93146	1.06167	1.58962	3.58962	2.28729	3.88609	4.93659	3.04121	2.2347	3.30909	2.75231	3.60042	0
4.74942	1.94743	0.56201	1.23552	3.67694	2.22869	3.69052	4.44159	2.83397	2.07405	2.23043	2.18597	3.43744	0
5.01904	1.60828	0.663935	1.82902	3.12149	2.07825	3.17571	4.95744	2.41789	1.96315	2.4315	1.66191	3.61511	0
4.97723	2.04562	1.27464	1.65175	3.71663	2.27699	3.87227	4.95935	3.16699	2.30423	3.35565	2.87649	3.87936	0
2.02947	1.25691	2.47773	1.27439	1.63011	2.88702	2.2371	2.99443	3.15622	3.84066	1.70949	2.81895	2.89007	0
2.65662	1.64264	1.15709	0.270554	1.56035	3.821	1.94743	1.34036	2.97976	4.27797	1.80406	2.8665	2.98088	0
5.49301	1.79046	1.00578	1.83559	3.32812	2.55426	3.53518	4.5506	2.55239	2.07965	2.43823	2.34068	4.17096	0
5.22054	1.98018	0.962223	1.66914	3.512	2.35344	3.30581	4.58714	2.41299	2.16524	3.35604	2.08135	3.99677	0
4.91136	2.19683	0.703992	1.85185	3.86151	2.0935	3.69812	4.98858	3.03804	2.30423	3.49611	2.61631	3.59558	0
2.07993	1.13779	1.31135	0.245073	0.83261	3.21509	1.40774	0.612621	2.30305	3.83211	0.818499	2.48233	2.70334	0
2.48462	2.21288	1.46945	1.61005	3.7374	3.25647	3.38133	2.10853	2.486	4.36074	4.66423	3.04962	2.62272	0
4.31749	2.10988	0.622925	0.87438	3.67427	1.83372	3.65308	4.38926	2.77593	2.10581	2.09754	2.22454	3.18999	0
4.4218	1.47625	0.595056	1.33299	3.03641	1.88373	3.36347	4.76732	2.379	1.97864	2.66498	2.38306	3.19905	0
4.48207	1.78677	0.874616	1.24955	3.52076	1.98325	3.38133	4.32958	2.50053	2.28501	3.19226	2.0496	3.27999	0
4.62965	2.08382	0.995021	1.53895	3.7602	1.83725	3.74257	4.2328	2.74029	2.30535	3.01881	2.08542	3.33225	0
2.78946	2.43446	1.29173	1.52152	3.94048	2.91497	3.68825	4.20614	2.52459	3.93221	4.48501	2.76835	2.2269	0
4.95706	2.69087	0.928603	1.74675	4.42003	2.19932	4.11719	4.32719	3.26786	2.46839	2.98479	2.49873	3.74605	0
5.03841	1.85644	1.05825	1.66914	3.24232	2.19184	3.2009	4.88902	2.18597	2.02082	3.16699	1.52371	3.85342	0
1.32255	0.727454	3.38604	0.657357	1.62413	1.14108	2.49473	3.24728	3.54453	1.68613	1.57542	2.62909	2.89313	0
1.4324	0.554769	1.98002	0.50959	1.0299	2.28387	2.9014	1.27467	2.60904	3.2169	1.51679	2.78686	2.30524	0
0.385389	0.328399	0.854823	0.375575	0.110376	0.822186	0.333768	2.05566	0.846829	1.23584	0.289218	0.730168	0.357534	0
5.17744	2.41956	1.42757	1.77315	4.10123	2.47124	3.96347	5.26755	3.14153	2.58361	3.00959	2.4666	3.84636	0
5.16903	1.61698	1.32242	1.73059	3.25741	2.44329	3.58162	4.99674	2.75512	2.06702	2.34489	2.39913	3.90575	0
5.27272	1.32639	0.818499	1.87262	3.09329	2.56124	3.10424	4.77605	2.49963	2.21288	3.17671	2.04679	3.94654	0
5.266	1.80144	0.57151	1.52152	3.31139	2.58616	3.47707	4.94847	2.71872	2.22264	3.60404	2.32472	3.86948	0
2.23926	0.762578	2.91371	0.929423	1.7324	3.09609	2.27122	2.80709	3.50279	4.08416	1.92932	3.0693	2.94554	0
4.73943	1.61046	1.20976	1.30406	3.34087	2.14319	3.59446	4.35987	2.88084	2.0935	2.72812	2.66498	3.63164	0
3.98589	2.12867	0.636701	1.31202	3.79252	1.78308	3.67255	4.48775	2.77936	2.33404	3.0338	1.95575	2.72379	0
1.58755	0.423555	1.43757	0.0894141	0.234836	2.88007	0.976328	3.60283	0.874616	3.96002	4.624	2.59517	2.05659	0
4.79059	1.68003	0.721489	1.20694	3.42957	2.16653	3.46617	4.42191	2.58858	2.34055	2.69816	2.22572	3.66532	0
3.00359	1.90044	0.901871	0.126066	1.36878	3.95547	1.70425	1.17988	2.89923	4.36924	0.654904	3.00085	3.23361	0
3.7646	1.66771	1.17906	1.37129	3.29397	1.72598	3.48161	4.48584	2.49692	2.19309	2.84813	2.51397	2.92324	0
4.47165	2.13132	1.07865	1.34846	3.8535	1.89045	3.69306	4.82252	2.92146	2.31648	3.07798	2.40509	3.33619	0
2.35257	2.10036	1.37883	1.93256	3.65568	3.15083	3.40792	1.6256	2.37186	4.16863	4.25715	2.79498	2.43919	0
4.94619	2.38704	1.42001	1.46753	3.99988	2.40749	3.86232	4.93087	3.2107	2.54723	3.43638	2.45062	3.70174	0
4.67181	2.49659	0.93238	1.4971	4.14087	2.05851	3.9004	4.55918	3.14439	2.60882	3.60765	2.48417	3.33146	0
4.11198	2.27353	0.305111	0.978877	3.98394	1.65106	3.91089	4.52281	2.9565	2.13925	2.25598	2.32686	3.00632	0
5.28651	1.88542	1.11522	1.84538	3.44446	2.59377	3.54667	4.94783	2.65574	2.34055	2.9321	2.42666	3.81565	0
5.1092	2.30423	1.15074	1.8023	3.87274	2.1353	3.6925	4.62518	2.93562	2.13397	3.04121	2.2456	3.77107	0
4.53293	1.56375	1.04447	1.1747	3.21313	1.92501	3.29328	4.1479	2.66728	2.15751	3.20085	2.09754	3.3595	0
3.86879	2.09762	1.33338	1.42763	3.6267	1.6213	3.47252	4.71642	2.40311	2.0149	2.4694	1.65173	2.74879	0
4.40161	1.89045	0.830707	1.01985	3.47359	2.00296	3.51484	4.3985	2.41102	2.08243	2.59681	2.09352	3.1401	0
4.91198	1.83019	0.725834	1.4324	3.47945	2.10988	3.52656	4.67639	2.49238	2.08382	3.07289	2.10819	3.65279	0
4.38914	2.11393	0.0718714	0.805394	3.70659	1.94107	3.62932	4.27055	3.01286	2.32859	3.02526	2.41593	3.26828	0
1.19239	1.0132	3.29853	0.495595	1.8224	1.14108	2.09074	3.11634	3.28951	1.6256	1.67801	2.44397	2.70923	0
4.91469	1.06312	0.777068	1.33039	2.86581	2.24068	3.08787	4.43476	2.39113	1.86676	2.19453	2.20664	3.69379	0
4.39241	2.10853	0.850831	1.0299	3.80876	1.90869	3.66039	4.55977	2.67945	2.17673	2.37288	2.34699	3.33736	0
5.16133	1.5431	0.965908	1.70495	3.02983	2.22989	2.98076	5.00672	2.2006	1.97864	3.23274	1.8164	3.78045	0
4.71387	1.84252	0.854823	1.15373	3.57468	1.88542	3.75006	4.51676	3.00304	2.01935	2.78482	2.70038	3.52616	0
4.47478	4.08244	1.64557	1.60803	5.66196	3.40942	5.15661	2.73576	4.09394	4.36189	5.44126	3.38267	3.34363	0
5.13724	1.98018	0.924816	1.52809	3.52355	2.31759	3.71592	4.64824	2.83527	2.06136	2.73815	2.57778	3.84683	0
4.20511	2.11259	0.538059	1.00293	3.59858	2.10717	3.6857	4.75393	2.97131	2.56298	3.49107	2.40112	3.13675	0
2.91936	2.85307	2.27642	2.85015	4.5491	3.26516	4.19987	2.2941	3.08103	4.35943	5.42521	3.12128	2.74667	0
5.08453	1.79046	0.984178	2.18807	3.51263	2.24662	3.66909	4.49486	3.17117	2.00895	2.6155	2.60172	3.71691	0
4.40766	1.68613	0.690745	0.870632	3.23655	1.92824	3.34648	4.29325	2.54292	2.17546	3.1031	2.15985	3.21159	0
1.27439	0.593533	0.958529	0.604953	0.631347	1.91688	2.50949	3.55835	2.0962	2.90635	0.894138	2.38002	2.16111	0
3.84476	2.28387	0.650371	0.793577	4.00373	1.73571	3.7859	4.4748	2.86399	2.38497	2.63068	2.29093	2.53074	0
3.87624	1.90869	0.681856	0.922209	3.5076	1.56147	3.48474	4.38701	2.6802	2.20797	2.76211	2.25138	2.8913	0
2.4001	1.4336	1.60574	0.0105331	1.19532	3.59912	1.74919	3.00401	3.25131	4.02036	2.15607	2.79228	2.82877	0
5.38933	1.93307	1.24852	1.76443	3.43941	2.55863	3.64216	4.35173	3.00796	2.15233	3.05639	2.69742	4.10203	0
4.54351	2.69469	1.10535	1.32517	4.29477	2.28272	4.13384	4.31014	3.2031	2.50766	2.63701	2.30414	3.35102	0
2.61839	1.51256	1.59069	0.315982	1.68058	3.54045	2.09212	1.21129	3.42708	4.24229	0.632121	2.99313	2.92916	0
0.761607	0.349821	1.43258	0.528107	0.777675	1.46636	2.52583	4.66503	1.98749	2.11123	1.22482	2.23512	1.78617	0
4.65412	1.55232	0.444485	1.11067	3.09138	2.16781	3.28484	4.65181	2.64251	2.09625	2.89497	2.29425	3.49376	0
5.24949	2.59461	1.14436	2.31103	4.34135	2.49566	4.25266	4.70489	3.41952	2.51497	2.87712	2.65574	4.03916	0
3.03489	2.17164	0.224964	1.18358	3.85484	1.50299	3.74069	4.59106	2.93796	2.19184	2.84813	2.18965	2.18843	0
4.62708	2.22264	0.797925	1.30672	3.904	2.01787	3.78667	4.8344	2.94088	2.28729	3.00905	2.48874	3.51141	0
4.96385	1.65106	0.772862	1.58133	3.15567	2.28957	3.46511	4.75217	2.62112	2.07825	2.55496	2.50951	3.72521	0
4.65592	2.51769	0.91721	1.14158	4.07849	1.99087	3.97885	4.70592	3.02258	2.39936	3.51897	2.5104	3.36792	0
0.295865	0.333768	1.63523	0.245073	0.234836	0.903357	0.459643	1.45638	0.627529	1.25392	0.197906	0.627529	0.797925	0
4.43463	1.83372	0.772862	1.58548	3.56222	1.92663	3.69644	4.53516	2.80837	2.0866	2.69816	2.39113	3.07442	0
3.82543	1.86333	0.508942	0.687217	3.5142	1.94267	3.50229	4.2387	3.02847	2.26774	3.13098	2.26511	2.71654	0
4.69883	2.01639	0.928603	1.20983	3.55201	2.05994	3.35797	5.00307	2.55922	2.35983	3.11248	1.99194	3.34791	0
4.69518	2.43839	0.717132	1.30139	4.11903	2.25135	3.89696	4.59862	2.98535	2.31316	2.86336	2.38912	3.52778	0
3.86195	0.58873	1.02702	0.699854	0.720703	1.36779	1.93948	3.61723	1.51214	1.9863	2.5193	1.6036	2.63937	0
2.31824	1.27467	1.23673	0.0421209	0.801465	3.51719	1.08736	1.53379	1.43757	3.71371	4.79341	2.48141	2.91848	0
2.68205	2.21533	4.53288	2.02128	3.21482	2.35557	4.5671	4.21672	4.99205	3.18277	2.80036	4.51439	4.27331	0
5.06888	1.37858	1.06509	1.51049	3.11265	2.30535	3.32187	4.23461	2.53336	2.178	2.97639	2.23278	3.67658	0
0.75351	0.875469	1.16341	0.300905	1.12003	1.6061	2.65346	4.74155	2.11084	2.5819	0.622925	2.30085	2.04257	0
3.01034	2.85177	2.04538	0.817119	4.47658	3.19767	3.99462	2.22021	3.17163	4.26547	5.74327	3.09762	2.87898	0
3.04445	2.05566	1.62898	0.141725	1.60192	4.20089	1.40512	2.79475	3.28579	4.17073	4.58502	2.93855	3.44699	0
5.23551	1.90044	0.533235	1.53895	3.49809	2.37143	3.75511	4.73321	2.815	2.30982	2.93679	2.44778	3.87477	0
5.18201	2.57849	1.25145	1.55822	4.2576	2.44329	4.1068	4.86833	3.14297	2.50122	3.04227	2.54379	3.93795	0
1.46522	0.75387	1.5306	1.03655	1.22131	2.33077	3.37941	5.11991	2.73887	2.91864	1.31966	2.80103	2.31719	0
2.72968	1.22669	1.09208	0.245073	1.05957	3.80625	1.46387	1.85298	1.44005	4.41179	3.14535	2.95822	3.08103	0
4.39812	1.11786	0.951109	0.900337	2.68705	2.01639	3.15807	4.54688	2.62512	2.17546	3.07186	2.412	3.27582	0
1.49485	0.480019	1.34424	0.152146	0.280699	2.62772	1.22975	4.41878	0.866732	3.76513	4.2412	2.4041	2.09082	0
2.13419	1.39722	4.10349	1.06931	2.65515	1.83019	3.06227	3.59197	4.08225	2.06702	2.25483	3.24142	3.52322	0
3.17035	2.96515	1.38145	0.761607	4.60699	3.24596	4.24376	1.44378	3.24055	4.32104	4.80444	3.11198	2.6749	0
1.94296	1.49818	4.08969	1.04317	2.41047	1.75491	2.95283	4.05905	4.17862	2.40038	2.08813	3.28745	3.36142	0
4.60562	2.36194	0.518693	1.38874	3.9857	2.00596	3.87086	4.34601	2.82747	2.28387	2.59681	2.54638	3.25855	0
3.59973	2.83666	1.83723	2.60531	4.37453	3.52155	4.0171	4.84212	2.90044	4.63403	4.48288	3.34207	3.079	0
[truncated: 42,142 more rows]
