# Supplementary material for: Identification of Stem Cells from Large Cell Populations with Topological Scoring
Source: bioRxiv preprint, doi:10.1101/2020.04.08.032102, version 1 (2020-04-09)
Supplement: Supplemental Table 3 [file 032102_file04.xlsx]

## Sheet: Nillson_TopS_clusteringOutput
Supplemental Table 3. X-shift/vortex clustering output using TopS values
ClusterID	EventID	File Name	Index in File	Event Name	Comment	CD10:CD10	CD110:CD110	CD11b:CD11b	CD123:CD123	CD19:CD19	CD3:CD3	CD34:CD34	CD38:CD38	CD4:CD4	CD45:CD45	CD45RA:CD45RA	CD49fpur:CD49fpur	CD90bio:CD90bio	label:label	FDL-X	FDL-Y	MST-X	MST-Y
76	0	Nillson_TopS	0	1	NA	-1.05475	-0.329501	0.464376	0.502788	-0.611255	-0.117441	0.400635	0.331677	0.150161	0.304115	-0.0417981	0.682447	-0.280441	0	NA	NA	-3.9653	1.78471
72	1	Nillson_TopS	1	2	NA	-0.48684	0.0130356	-0.103877	-0.672807	0.527615	0.390219	-0.200908	0.456854	-0.826592	0.965883	0.963736	0.0773391	-0.722877	0	-4080.51	-19294.6	8.83648	-17.3626
87	2	Nillson_TopS	2	3	NA	1.96813	-0.252162	-0.265308	0.304188	0.210713	-0.141711	-0.119528	0.353365	-0.455506	-1.02461	-0.218769	-0.757923	0.916331	0	-52780.6	-30093.7	-2.80321	-1.98428
71	3	Nillson_TopS	3	4	NA	-0.757278	-0.264955	2.18094	-0.177084	-0.253694	-0.293371	-0.122777	0.162993	1.19401	-0.135886	-1.15658	0.324076	0.00798342	0	13708.1	14583.3	-7.2091	4.52457
78	4	Nillson_TopS	4	5	NA	1.4776	0.178899	-0.756299	-0.12757	0.603401	-0.358275	0.22375	0.0668375	-0.267407	-0.828544	-0.0608311	-0.365025	0.590707	0	-51786.2	-26215.5	-1.47521	-5.09834
87	5	Nillson_TopS	5	6	NA	2.11825	-0.147901	-0.607489	0.293252	0.137883	-0.0177413	-0.0191542	-0.123005	-0.0240081	-1.08699	-0.613886	-0.287589	0.93058	0	NA	NA	-2.80321	-1.98428
68	6	Nillson_TopS	6	7	NA	-0.921191	0.221253	1.41844	1.17202	-0.933429	0.0979467	-0.587643	0.384211	-0.271126	0.677105	-0.670141	0.216828	0.00292095	0	NA	NA	-7.16747	12.5824
71	7	Nillson_TopS	7	8	NA	-1.24829	0.138414	1.93739	-0.096549	-0.369837	-0.416471	-0.0722225	0.266703	1.68777	-0.00416358	-0.975749	0.267907	-0.275959	0	13358.9	15788.3	-7.2091	4.52457
87	8	Nillson_TopS	8	9	NA	1.95928	-0.595405	-0.648863	0.206329	-0.0521961	-0.198636	-0.0292002	0.429635	-0.314798	-0.707869	0.0785996	-0.42081	0.756887	0	NA	NA	-2.80321	-1.98428
90	9	Nillson_TopS	9	10	NA	1.23262	-0.0807129	-0.709925	0.111005	0.381535	-0.553082	0.195089	0.672165	-0.0735026	-0.748112	-0.214404	-0.253407	0.355734	0	-50806.4	-26827.4	0.04133	-8.05116
76	10	Nillson_TopS	10	11	NA	-0.833188	-0.961061	0.765412	1.35897	-1.21046	-0.262804	0.0544387	0.985987	0.0927959	0.391313	0.443434	0.326098	-0.354002	0	-5154.91	22858.2	-3.9653	1.78471
90	11	Nillson_TopS	11	12	NA	1.37487	-0.0928627	-0.593631	0.0666026	0.291801	-0.264602	0.22312	0.550695	-0.118298	-0.915508	-0.39237	-0.249494	0.433299	0	NA	NA	0.04133	-8.05116
90	12	Nillson_TopS	12	13	NA	0.81382	0.305663	-0.395583	-0.440358	0.781876	-0.652502	0.326236	0.62247	-0.163105	-0.619119	0.139949	-0.338995	-0.0984358	0	NA	NA	0.04133	-8.05116
71	13	Nillson_TopS	13	14	NA	-1.22582	-0.278728	3.57395	-0.0251092	-0.520947	-0.396696	-0.204679	-1.3554	1.37957	-0.168189	-0.925938	0.937295	0.642681	0	16236.4	12272.2	-7.2091	4.52457
89	14	Nillson_TopS	14	15	NA	-1.10385	0.494265	0.149746	0.739512	0.999185	0.258401	0.0293532	-1.15137	-0.587785	0.610106	1.39123	-0.183835	-0.920339	0	-2683.92	-22508.2	11.2514	-19.9456
81	15	Nillson_TopS	15	16	NA	0.564771	0.953747	-0.502604	-0.269699	1.48195	-0.639668	0.774189	-0.042134	0.318359	-0.807449	-0.877374	-0.296494	-0.122865	0	NA	NA	3.47305	-13.3053
90	16	Nillson_TopS	16	17	NA	1.59025	0.0482567	-0.689253	0.222842	0.740494	-0.370873	0.134694	0.125089	-0.268534	-0.784233	-0.124032	-0.736081	0.525126	0	-51682	-27034.6	0.04133	-8.05116
71	17	Nillson_TopS	17	18	NA	-1.25979	-0.363383	3.42316	-0.339452	-0.171863	-0.616884	-0.135918	-0.618978	1.5648	-0.753403	-0.75262	0.766677	0.550378	0	NA	NA	-7.2091	4.52457
95	18	Nillson_TopS	18	19	NA	-1.41991	0.236664	1.29534	0.143989	-0.224071	-0.26793	-0.222703	1.13333	1.8655	-0.0140385	-1.09037	0.244573	-0.60903	0	12309.1	17622.6	-5.89098	4.66014
90	19	Nillson_TopS	19	20	NA	1.23145	0.0744236	-0.550897	-0.126451	0.683137	-0.493863	0.204063	0.826883	-0.145172	-0.811248	-0.176028	-0.462371	0.0765445	0	NA	NA	0.04133	-8.05116
79	20	Nillson_TopS	20	21	NA	-0.152509	0.146476	-0.0320002	-0.80754	-1.18074	2.33975	-1.15281	0.250243	-0.835412	2.34795	-1.03262	1.01339	0.510705	0	57408.6	-8721.91	-2.18619	19.1368
74	21	Nillson_TopS	21	22	NA	-1.00058	1.01467	-0.718639	-0.112153	1.48688	0.480963	0.503468	-2.0963	-0.0889111	1.0237	1.21144	0.163782	-0.777782	0	-1365.17	-26721.2	10.1585	-18.3044
90	22	Nillson_TopS	22	23	NA	1.60764	-0.196434	-0.395031	0.0694416	0.36877	-0.326322	-0.201541	0.679873	-0.531872	-0.850807	0.565209	-0.796085	0.436262	0	NA	NA	0.04133	-8.05116
87	23	Nillson_TopS	23	24	NA	0.968202	-0.103203	-0.642302	0.356129	0.339786	-0.461091	0.0953354	0.65621	-0.0852012	-0.958369	0.49238	-0.347573	0.0054133	0	NA	NA	-2.80321	-1.98428
90	24	Nillson_TopS	24	25	NA	1.01113	0.432427	-0.559373	0.40274	0.91039	-0.509693	0.234663	0.64663	-0.0521178	-1.1011	-0.302614	-0.679075	0.00592007	0	-47113.3	-24023.9	0.04133	-8.05116
85	25	Nillson_TopS	25	26	NA	0.800978	0.232411	1.48891	0.624394	-0.695106	0.298023	-0.837182	-0.745603	-0.6167	0.614257	-0.381058	0.076948	-0.0538406	0	27028	19282.8	-6.1752	13.2135
86	26	Nillson_TopS	26	27	NA	-1.05578	-0.698258	0.62851	0.425357	-1.17077	0.44403	0.403317	0.834458	0.47877	0.647055	-1.02145	0.450507	0.494132	0	NA	NA	-4.2936	8.20126
94	27	Nillson_TopS	27	28	NA	-0.83312	0.591789	-0.437788	-0.738301	1.10721	0.755269	0.222182	-2.45227	-0.118559	1.34129	2.58335	0.329108	-0.49065	0	NA	NA	11.5245	-18.2658
102	28	Nillson_TopS	28	29	NA	-1.19011	-0.270109	1.82583	-0.344835	-0.615556	0.608891	-0.393467	-0.470496	1.3008	1.25135	-0.95292	0.580716	-0.432155	0	NA	NA	-5.64805	12.479
90	29	Nillson_TopS	29	30	NA	1.29324	-0.0597243	-0.640502	0.107393	0.465334	-0.411339	0.264265	0.225784	0.0782005	-1.11148	-0.0258357	-0.285567	0.453961	0	-52076.4	-27044.9	0.04133	-8.05116
101	30	Nillson_TopS	30	31	NA	0.476262	0.277639	-0.7254	-0.529291	0.592695	-0.44543	0.488054	0.491936	-0.08401	-0.468033	0.374761	-0.0798756	-0.107455	0	-40838.3	-23864.3	1.66122	-10.7159
68	31	Nillson_TopS	31	32	NA	-0.979073	0.0497148	1.97745	0.8846	-0.905725	0.0368933	-0.827727	0.134939	0.130711	0.872683	-0.480271	0.230155	-0.191002	0	NA	NA	-7.16747	12.5824
87	32	Nillson_TopS	32	33	NA	1.451	-0.388578	-0.688652	-0.00433245	-0.104696	-0.155411	-0.34341	0.940919	-0.64492	-0.338859	0.745935	-0.587557	0.560362	0	NA	NA	-2.80321	-1.98428
101	33	Nillson_TopS	33	34	NA	0.818614	0.150305	-0.833569	-0.367836	0.685811	-0.486737	0.299752	0.19648	0.137801	-0.556375	0.429882	-0.194323	0.0109754	0	NA	NA	1.66122	-10.7159
101	34	Nillson_TopS	34	35	NA	1.11161	0.597523	-0.770545	-0.0648524	1.20119	-0.626263	0.339907	0.595243	-0.178784	-0.678424	-0.229617	-0.654448	-0.160601	0	NA	NA	1.66122	-10.7159
69	35	Nillson_TopS	35	36	NA	-0.123816	0.466238	0.07961	-0.756821	-0.943034	2.308	-1.06832	-1.11217	0.6989	1.62686	-1.05112	0.63037	0.439434	0	58745.8	-5568.05	-2.63306	16.7582
90	36	Nillson_TopS	36	37	NA	0.9829	0.23347	-0.0756533	0.20067	0.653277	-0.579517	0.189655	0.707752	-0.199451	-1.02081	-0.296071	-0.42691	-0.0642358	0	-48020	-24705.3	0.04133	-8.05116
101	37	Nillson_TopS	37	38	NA	1.3666	0.476188	-0.78212	0.429886	0.944105	-0.416516	0.442742	-0.148158	-0.10318	-1.0498	-0.504166	-0.412807	0.259219	0	-49202.4	-23980.6	1.66122	-10.7159
71	38	Nillson_TopS	38	39	NA	-1.25113	-0.497103	3.28345	-0.333316	-0.386758	-0.635194	-0.182156	0.125982	1.49095	-0.512626	-0.827461	0.610332	0.30901	0	13856.1	13039.2	-7.2091	4.52457
101	39	Nillson_TopS	39	40	NA	0.590005	0.250343	-0.203036	0.208665	0.801008	-0.515506	0.287417	0.301751	0.00226255	-0.672492	-0.54641	-0.10569	-0.171032	0	-45782	-22777.4	1.66122	-10.7159
102	40	Nillson_TopS	40	41	NA	-0.771115	-0.616548	2.30922	-0.18316	-1.26163	1.06958	-1.2633	-0.531741	0.412535	1.61498	-0.422297	0.556418	0.36286	0	NA	NA	-5.64805	12.479
70	41	Nillson_TopS	41	42	NA	-1.15206	0.82361	0.0676067	-0.476521	1.33893	-0.726223	0.666036	3.40751	-0.222465	-0.2098	-0.650272	-0.58653	-1.03748	0	-18676.1	-3389.36	-1.98822	5.2871
90	42	Nillson_TopS	42	43	NA	1.08664	0.403301	-0.353974	0.00459452	0.732229	-0.338055	0.0962385	-0.12506	-0.100275	-0.778166	-0.0817056	-0.463888	0.138826	0	NA	NA	0.04133	-8.05116
90	43	Nillson_TopS	43	44	NA	1.07618	0.139489	-0.436234	-0.165259	0.499381	-0.365061	-0.0227558	0.655409	-0.297506	-0.731352	0.238125	-0.532018	0.188369	0	NA	NA	0.04133	-8.05116
90	44	Nillson_TopS	44	45	NA	0.912214	0.232085	-0.342318	-0.0222793	0.794806	-0.589813	0.180782	0.496786	-0.29858	-0.570501	-0.208253	-0.340727	0.00164546	0	NA	NA	0.04133	-8.05116
87	45	Nillson_TopS	45	46	NA	0.848681	-0.467559	-0.220794	0.145361	0.0798002	-0.608449	0.275078	1.20153	-0.0770436	-0.904399	0.228796	-0.131491	-0.0478887	0	NA	NA	-2.80321	-1.98428
84	46	Nillson_TopS	46	47	NA	-0.970936	-0.536764	0.205403	0.500084	-0.933208	0.655377	0.433898	-1.21477	0.623479	1.28225	-0.568804	0.82005	0.535915	0	8043.81	38168	-3.02112	14.8073
94	47	Nillson_TopS	47	48	NA	-0.953453	0.122616	-0.139783	-0.0671827	0.704051	0.867845	-0.149731	-1.63598	-0.496344	1.53027	1.41701	0.100159	-0.468631	0	NA	NA	11.5245	-18.2658
78	48	Nillson_TopS	48	49	NA	1.56697	-0.266802	-0.0122385	0.365647	0.288929	-0.301389	0.0602362	-0.502795	-0.105124	-1.05077	0.0984708	-0.35155	0.54055	0	-53432.4	-27668.5	-1.47521	-5.09834
89	49	Nillson_TopS	49	50	NA	-1.21113	0.465035	0.204274	0.881133	0.922708	0.357845	0.0272105	-1.40993	-0.311271	0.844557	1.21601	-0.0677859	-1.1542	0	-2078.92	-22323.3	11.2514	-19.9456
76	50	Nillson_TopS	50	51	NA	-0.388728	-0.818291	0.34638	0.623749	-1.09917	-0.121805	0.296889	0.670219	-0.187854	0.326256	0.839206	0.221738	-0.26031	0	-8587	16871.5	-3.9653	1.78471
90	51	Nillson_TopS	51	52	NA	1.14843	0.204874	-0.299484	-0.0236814	0.65885	-0.341881	0.0402202	0.55142	-0.21303	-0.915708	0.288399	-0.813836	0.0457872	0	NA	NA	0.04133	-8.05116
87	52	Nillson_TopS	52	53	NA	1.82244	-0.0656625	-0.745801	0.0424134	0.519605	-0.102282	-0.152288	1.07588	-0.395021	-0.700212	-0.836065	-0.529154	0.65374	0	NA	NA	-2.80321	-1.98428
90	53	Nillson_TopS	53	54	NA	1.00338	0.0868871	-0.476285	-0.0591783	0.585645	-0.356121	0.1037	0.678187	-0.0942526	-0.592952	-0.224383	-0.466156	0.0395397	0	NA	NA	0.04133	-8.05116
81	54	Nillson_TopS	54	55	NA	0.191476	0.944052	-0.376362	-0.37566	1.36377	-0.576044	0.567367	-0.0370513	0.159863	-0.619971	0.0456422	-0.535845	-0.410672	0	NA	NA	3.47305	-13.3053
81	55	Nillson_TopS	55	56	NA	0.906872	0.818936	-0.773241	0.200325	1.30597	-0.517744	0.596695	-0.199548	0.139867	-0.900381	-0.452022	-0.70075	0.0823358	0	NA	NA	3.47305	-13.3053
78	56	Nillson_TopS	56	57	NA	1.57648	0.0265913	-0.745877	0.0801819	0.526049	-0.143492	0.110563	0.31001	-0.165735	-0.833272	-0.506344	-0.357713	0.515078	0	-52938.2	-26132.6	-1.47521	-5.09834
87	57	Nillson_TopS	57	58	NA	1.309	-0.454866	-0.00125732	0.837017	-0.183525	-0.552772	0.11827	0.928031	-0.22485	-1.08672	-0.331932	-0.185951	0.277476	0	NA	NA	-2.80321	-1.98428
90	58	Nillson_TopS	58	59	NA	0.930637	-0.301605	-0.452288	-0.438182	0.0676488	-0.398658	0.0890902	0.912809	-0.0654613	-0.491486	0.622169	-0.236977	0.0172979	0	NA	NA	0.04133	-8.05116
101	59	Nillson_TopS	59	60	NA	0.961852	0.519821	-0.474747	0.216279	1.12847	-0.67547	0.443578	-0.353764	0.0604521	-0.905955	-0.245664	-0.354831	0.0575356	0	-46180.3	-22887.6	1.66122	-10.7159
102	60	Nillson_TopS	60	61	NA	-0.421401	-0.237053	2.16587	0.332532	-0.57243	0.000392219	-0.0271269	-0.51685	0.682607	0.0486576	-1.00278	0.217248	0.0814277	0	18631.5	14641.8	-5.64805	12.479
69	61	Nillson_TopS	61	62	NA	-0.382919	0.338895	0.543655	-0.636644	-0.661703	2.05966	-0.775714	-1.85105	1.13531	2.07178	-1.40269	0.897687	0.427364	0	59014.7	-3121.38	-2.63306	16.7582
101	62	Nillson_TopS	62	63	NA	0.940746	0.367916	-0.580621	0.0655962	0.852242	-0.508487	0.349402	0.354146	-0.0979251	-0.812887	-0.342456	-0.350698	0.0528893	0	-46663.5	-23748.5	1.66122	-10.7159
94	63	Nillson_TopS	63	64	NA	-0.677735	0.224443	-0.676986	-0.174794	0.547611	0.519736	-0.262545	-0.731416	-0.62446	1.15048	1.6047	0.108417	-0.488794	0	594.371	-23097.6	11.5245	-18.2658
90	64	Nillson_TopS	64	65	NA	1.51975	0.0861704	-0.423203	-0.131301	0.704161	-0.165921	0.134442	0.49767	-0.290523	-0.754151	-0.533873	-0.66038	0.397857	0	NA	NA	0.04133	-8.05116
90	65	Nillson_TopS	65	66	NA	0.84301	0.225125	-0.480595	0.351368	0.747233	-0.575971	0.0812997	0.679986	-0.187844	-0.841687	-0.0861066	-0.371959	-0.101652	0	NA	NA	0.04133	-8.05116
71	66	Nillson_TopS	66	67	NA	-1.10583	-0.30219	2.19992	-0.00637306	-0.211587	-0.522471	0.102927	0.67793	1.29168	-0.232728	-0.872261	0.178302	-0.28866	0	12767.9	15430.4	-7.2091	4.52457
86	67	Nillson_TopS	67	68	NA	-1.23799	-0.485593	0.627604	0.682974	-0.808811	0.250432	0.482802	0.808919	0.419103	0.890474	-1.1208	0.682598	-0.345394	0	-1973.35	35949.5	-4.2936	8.20126
90	68	Nillson_TopS	68	69	NA	1.20412	0.299265	-0.567954	0.00208677	0.534041	-0.4435	0.238724	0.182391	0.0405819	-0.909594	-0.265225	-0.275126	0.244476	0	NA	NA	0.04133	-8.05116
69	69	Nillson_TopS	69	70	NA	0.0334194	0.15892	-0.118916	-0.624137	-1.01386	2.51521	-1.02338	-1.63565	0.297513	2.70841	-1.32783	1.27938	0.701268	0	60688.7	-6395.13	-2.63306	16.7582
87	70	Nillson_TopS	70	71	NA	1.22668	0.306208	-0.245061	0.417043	0.818984	-0.528909	0.144125	0.254835	-0.39965	-0.974155	0.144282	-0.93066	0.173906	0	-49527.8	-26213.2	-2.80321	-1.98428
78	71	Nillson_TopS	71	72	NA	1.63077	0.209689	-0.734611	0.00824828	0.773747	-0.239887	0.245887	0.247978	-0.117208	-0.898738	-0.46459	-0.64583	0.4444	0	NA	NA	-1.47521	-5.09834
71	72	Nillson_TopS	72	73	NA	-1.14424	-0.373233	1.89567	0.113073	-0.321097	-0.601676	0.598157	-0.0256121	1.40684	-0.394701	-1.29909	1.1352	0.106112	0	11025.8	16351.9	-7.2091	4.52457
90	73	Nillson_TopS	73	74	NA	1.27462	0.345414	-0.684608	0.120326	0.863614	-0.456617	0.2886	0.511389	-0.281121	-0.9264	-0.174758	-0.719347	0.259503	0	NA	NA	0.04133	-8.05116
81	74	Nillson_TopS	74	75	NA	0.559837	0.554411	-0.639551	-0.411799	1.03705	-0.692437	0.586389	0.642063	0.161359	-0.736807	-0.16475	-0.238974	-0.273348	0	NA	NA	3.47305	-13.3053
91	75	Nillson_TopS	75	76	NA	0.0780001	-0.653726	0.257201	1.60832	-0.916474	-0.152981	-0.131076	0.265865	-0.249255	0.183994	0.253176	-0.0460085	-0.0827047	0	-7533.64	17078.8	-3.17219	1.32407
90	76	Nillson_TopS	76	77	NA	1.06698	0.157469	-0.610629	-0.171029	0.461023	-0.295456	0.204028	0.00849842	-0.0639349	-0.676156	0.145886	-0.247984	0.218119	0	NA	NA	0.04133	-8.05116
86	77	Nillson_TopS	77	78	NA	-1.47051	-0.587798	0.431817	0.797184	-0.821033	-0.278853	0.987459	-0.275452	0.783458	0.0889621	0.269409	0.958896	-0.212852	0	-2586.68	27181.2	-4.2936	8.20126
91	78	Nillson_TopS	78	79	NA	-0.413929	-0.835909	0.371812	1.56192	-1.10277	-0.131063	0.0539159	0.0627275	-0.132433	0.216003	0.873401	0.208138	-0.168734	0	-7265.46	17175.2	-3.17219	1.32407
87	79	Nillson_TopS	79	80	NA	1.60571	-0.148285	-0.835221	0.0236161	0.352408	-0.185209	-0.0187087	0.395634	-0.394765	-0.762833	0.160437	-0.322381	0.503942	0	-52195.2	-28663	-2.80321	-1.98428
87	80	Nillson_TopS	80	81	NA	1.3459	-0.134839	-0.759066	-0.318382	0.066871	-0.220237	0.197894	0.121109	-0.125551	-0.439994	0.250043	-0.101909	0.387079	0	-51381.4	-28638.4	-2.80321	-1.98428
90	81	Nillson_TopS	81	82	NA	1.04377	0.268	-0.566493	-0.334389	0.845129	-0.463569	0.329259	-0.0452264	-0.0119172	-0.836057	0.124117	-0.164877	0.108114	0	NA	NA	0.04133	-8.05116
68	82	Nillson_TopS	82	83	NA	-0.962492	0.284694	1.4197	0.984199	-0.697742	0.132099	-0.743379	0.408748	0.194164	0.667041	-0.436218	0.175094	-0.656401	0	NA	NA	-7.16747	12.5824
95	83	Nillson_TopS	83	84	NA	-0.978994	-0.151115	1.40224	0.0184648	-0.655929	0.0881029	-0.542718	1.41745	1.20516	0.420561	-1.17555	0.293886	-0.450444	0	12315.8	18870.2	-5.89098	4.66014
71	84	Nillson_TopS	84	85	NA	-0.636101	-0.148934	1.85699	-0.0337548	-0.340268	-0.548941	-0.425239	0.697007	1.07204	0.113235	-0.634261	0.127331	-0.463577	0	12420.9	16350.3	-7.2091	4.52457
87	85	Nillson_TopS	85	86	NA	1.95983	-0.501879	-0.667411	0.319346	0.0476288	-0.108532	0.027668	0.174746	-0.323643	-0.953615	0.0106926	-0.368132	0.859661	0	NA	NA	-2.80321	-1.98428
87	86	Nillson_TopS	86	87	NA	1.58074	-0.232113	-0.469915	-0.0529468	0.117258	-0.0676019	-0.133407	0.511565	-0.19282	-0.773457	0.0865746	-0.570384	0.528571	0	NA	NA	-2.80321	-1.98428
101	87	Nillson_TopS	87	88	NA	0.89557	0.400604	-0.695136	-0.123781	0.895103	-0.589792	0.375151	0.141504	0.0501801	-0.832595	0.113778	-0.324616	0.00993618	0	-45061.2	-24244.2	1.66122	-10.7159
87	88	Nillson_TopS	88	89	NA	1.68085	-0.0819507	-0.504431	0.244639	0.371181	-0.182126	0.0200195	0.692508	-0.298268	-0.95521	-0.513702	-0.567317	0.529939	0	NA	NA	-2.80321	-1.98428
70	89	Nillson_TopS	89	90	NA	-1.28997	-0.315346	1.05146	-0.387487	-0.397082	-0.574298	0.111037	3.09962	1.23185	-0.163155	-0.877196	0.227551	-0.575571	0	-8501.83	8660.99	-1.98822	5.2871
90	90	Nillson_TopS	90	91	NA	1.47114	0.461091	-0.74247	0.101757	0.792188	-0.320734	0.144998	0.320201	-0.293359	-0.918954	-0.362226	-0.526685	0.293827	0	NA	NA	0.04133	-8.05116
94	91	Nillson_TopS	91	92	NA	-1.00419	0.669219	0.12207	-0.603808	1.12038	0.614851	0.111747	-2.16552	-0.300144	1.08767	2.3226	0.0913498	-0.772532	0	NA	NA	11.5245	-18.2658
90	92	Nillson_TopS	92	93	NA	1.4994	-0.180351	-0.180868	0.785789	0.205796	-0.581993	0.089033	0.572879	-0.325835	-1.00373	-0.526114	-0.341973	0.413506	0	NA	NA	0.04133	-8.05116
77	93	Nillson_TopS	93	94	NA	0.322506	0.50639	-0.440477	0.0877548	0.919484	-0.189969	0.0809675	0.0471754	-0.323519	-0.00494425	0.26094	-0.607551	-0.478311	0	-28523.7	-22300.9	7.51315	-16.4179
87	94	Nillson_TopS	94	95	NA	1.57171	-0.353802	-0.571543	0.198933	-0.0793464	-0.251638	-0.594487	0.672019	-0.586644	-0.285261	0.980895	-0.78042	0.581864	0	NA	NA	-2.80321	-1.98428
101	95	Nillson_TopS	95	96	NA	0.985501	0.757363	-0.755983	-0.298811	1.24283	-0.465762	0.429765	-0.170279	0.0644153	-0.782439	-0.0439802	-0.573276	0.0511461	0	-44318.3	-23467.1	1.66122	-10.7159
84	96	Nillson_TopS	96	97	NA	-0.752689	-0.604937	0.419096	-0.200809	-1.06059	0.487665	0.527617	-0.341397	0.459278	0.979983	-0.910763	0.762708	0.929574	1	6286.96	37611.6	-3.02112	14.8073
81	97	Nillson_TopS	97	98	NA	0.308092	0.434732	-0.497232	-0.0545134	0.869218	-0.965043	0.477472	0.83636	-0.0957734	-0.759913	0.448961	-0.257427	-0.375876	0	-38278.6	-22319.3	3.47305	-13.3053
76	98	Nillson_TopS	98	99	NA	-0.388213	-0.97746	0.147137	0.604055	-1.04113	-0.137916	0.258887	0.759112	0.289292	0.289691	0.489752	0.493517	-0.333811	0	-7597.83	19495.7	-3.9653	1.78471
87	99	Nillson_TopS	99	100	NA	1.61266	-0.292359	-0.461857	0.170617	0.303667	-0.337603	-0.0685797	0.450102	-0.370403	-0.773902	0.202048	-0.596084	0.526228	0	NA	NA	-2.80321	-1.98428
81	100	Nillson_TopS	100	101	NA	0.803983	1.03293	-0.560342	-0.24692	1.4705	-0.668582	0.645543	0.299424	0.119602	-0.869698	-0.959468	-0.444881	-0.0678099	0	NA	NA	3.47305	-13.3053
78	101	Nillson_TopS	101	102	NA	1.31149	-0.156416	-0.474005	0.0983263	0.379977	-0.326023	0.224324	0.157252	-0.0913493	-0.813242	-0.033654	-0.24968	0.210531	0	-52657.6	-27655.2	-1.47521	-5.09834
81	102	Nillson_TopS	102	103	NA	0.442549	0.252193	-0.766756	-0.175912	0.824294	-0.533706	0.593289	0.647581	-0.142469	-0.595875	0.198898	-0.32231	-0.116429	0	NA	NA	3.47305	-13.3053
88	103	Nillson_TopS	103	104	NA	-0.653252	-0.198333	0.938683	-0.850138	-1.27788	1.63413	-1.3929	-1.27536	0.521698	1.39061	1.92752	0.397069	0.321228	0	54017.1	-16525.7	-1.47868	23.5644
81	104	Nillson_TopS	104	105	NA	0.30414	0.728945	-0.191906	-0.383023	1.05136	-0.557159	0.427879	0.0974748	0.217576	-0.757207	-0.0234706	-0.364167	-0.281102	0	NA	NA	3.47305	-13.3053
103	105	Nillson_TopS	105	106	NA	-0.215792	0.112823	0.46032	-0.585785	-1.16834	2.22127	-1.0615	-1.84286	-0.569913	2.26701	0.644736	1.06202	0.344138	0	55082.8	-12396	-1.77317	21.6487
78	106	Nillson_TopS	106	107	NA	1.37938	-0.102537	-0.237818	0.374834	0.341487	-0.501137	0.103211	0.536717	0.0178457	-0.950367	-0.60856	-0.370209	0.357136	0	-51721	-25960.9	-1.47521	-5.09834
87	107	Nillson_TopS	107	108	NA	1.52571	-0.679577	-0.244069	0.791593	-0.292832	-0.179376	-0.305519	0.293832	-0.578067	-0.665979	0.885545	-0.591447	0.525361	0	NA	NA	-2.80321	-1.98428
68	108	Nillson_TopS	108	109	NA	-0.908253	0.204289	1.75357	0.814997	-0.648951	0.192288	-0.458482	-0.334769	-0.21692	0.81514	-0.667882	0.392863	-0.176586	0	30679.6	22303.6	-7.16747	12.5824
90	109	Nillson_TopS	109	110	NA	1.23493	-0.159504	-0.586683	-0.248303	0.426444	-0.361552	0.355772	0.442607	-0.203352	-0.892559	0.0758739	-0.126592	0.346053	0	NA	NA	0.04133	-8.05116
68	110	Nillson_TopS	110	111	NA	-0.648731	0.0280522	2.21071	0.304202	-0.882509	0.386754	-0.530462	-0.442773	0.0656183	0.815223	-0.815968	0.491473	-0.121793	0	29183.3	20602.2	-7.16747	12.5824
90	111	Nillson_TopS	111	112	NA	1.55797	0.266532	-0.762679	0.0754616	0.430451	-0.383823	0.251988	0.00166769	-0.249504	-0.963543	0.0909051	-0.439205	0.540306	0	NA	NA	0.04133	-8.05116
90	112	Nillson_TopS	112	113	NA	1.07899	0.1528	-0.772951	-0.131099	0.559948	-0.505977	0.25874	0.139581	-0.111533	-0.623739	0.382805	-0.291496	0.137085	0	-46669.4	-25840	0.04133	-8.05116
90	113	Nillson_TopS	113	114	NA	1.10327	0.322816	-0.463975	0.239684	0.892815	-0.548942	0.169728	0.0918919	-0.246556	-0.853885	-0.0186804	-0.558608	0.185701	0	-48548.8	-25235.7	0.04133	-8.05116
83	114	Nillson_TopS	114	115	NA	-0.693963	-0.717882	0.848641	-0.515552	-1.55119	1.66802	-1.14786	-1.77086	-0.10209	2.4142	2.43783	1.13281	0.30126	0	42909.1	-14366.2	-0.90395	27.6653
96	115	Nillson_TopS	115	116	NA	-0.0601648	0.623159	-0.854093	-0.335678	1.13658	-0.770057	0.68275	0.400637	0.305152	-0.502174	0.439256	-0.0167727	-0.606898	0	-35931.8	-21161.9	5.64891	-15.0421
89	116	Nillson_TopS	116	117	NA	-1.09965	0.745985	-0.17842	0.747889	1.36901	0.270866	0.309796	-1.96777	-0.235808	0.773317	1.40006	-0.0959937	-1.01578	0	-2126.57	-24094.8	11.2514	-19.9456
87	117	Nillson_TopS	117	118	NA	0.909875	-0.473884	-0.51686	-0.125135	-0.0795937	-0.427296	0.350987	0.286924	0.204293	-0.603392	0.34716	0.00930897	0.329812	0	NA	NA	-2.80321	-1.98428
81	118	Nillson_TopS	118	119	NA	-0.230034	0.524008	-0.0826327	-0.357329	1.13986	-0.389209	0.292102	0.911192	-0.346029	-0.0806604	0.196942	-0.545639	-0.736414	0	NA	NA	3.47305	-13.3053
78	119	Nillson_TopS	119	120	NA	1.6665	-0.232289	-0.744219	0.183498	0.323465	-0.180852	0.180924	0.00918774	-0.0349537	-0.941769	-0.215526	-0.20388	0.562548	0	-53859.5	-27232.5	-1.47521	-5.09834
76	120	Nillson_TopS	120	121	NA	-1.19922	-0.809126	0.233704	0.23131	-1.04906	-0.0129594	0.710902	1.13619	0.555107	0.428233	-0.0495479	0.720567	-0.194343	0	-5305.3	30116.5	-3.9653	1.78471
68	121	Nillson_TopS	121	122	NA	-1.07761	0.317112	1.99131	0.936363	-0.88289	0.363509	-0.734127	0.0493749	-0.331228	0.909581	-0.473017	0.273001	-0.361916	0	30276.6	23304.8	-7.16747	12.5824
87	122	Nillson_TopS	122	123	NA	1.14057	-0.232164	-0.443151	-0.0442748	0.304265	-0.529571	0.29488	1.01285	0.0104422	-0.803964	-0.61922	-0.100101	0.333176	0	-50979.7	-26488.7	-2.80321	-1.98428
90	123	Nillson_TopS	123	124	NA	1.29633	0.281895	-0.660795	-0.200502	0.718675	-0.452901	0.303077	0.0879637	0.0340614	-0.789006	-0.190314	-0.293325	0.18256	0	-48542.5	-24962.8	0.04133	-8.05116
68	124	Nillson_TopS	124	125	NA	-1.17424	0.612911	1.93679	0.91578	-1.05561	0.149725	-0.959285	0.522161	0.187871	0.523099	-0.667929	0.25662	-0.159562	0	28449.3	23534.9	-7.16747	12.5824
71	125	Nillson_TopS	125	126	NA	-0.400172	-0.0622765	2.29201	-0.120303	-0.285475	-0.411052	-0.509566	0.495325	1.56107	-0.344221	-0.472096	-0.0818676	-0.808212	0	12453.9	15843.1	-7.2091	4.52457
87	126	Nillson_TopS	126	127	NA	1.59923	-0.139237	-0.529007	0.610997	0.145004	-0.232016	-0.167625	0.513358	-0.12468	-0.961302	-0.180891	-0.673023	0.552782	0	NA	NA	-2.80321	-1.98428
81	127	Nillson_TopS	127	128	NA	0.270756	1.05484	-0.35277	-0.371484	1.2992	-0.535477	0.479538	-0.116994	0.12057	-0.636822	0.11573	-0.577476	-0.423123	0	NA	NA	3.47305	-13.3053
78	128	Nillson_TopS	128	129	NA	1.61563	-0.0323154	-0.306514	0.211307	0.546346	-0.114616	0.137178	0.00431552	-0.357954	-0.890407	-0.496895	-0.479423	0.50339	0	-53347.6	-26477.1	-1.47521	-5.09834
87	129	Nillson_TopS	129	130	NA	2.19255	-0.32759	-0.406906	0.655603	-0.00439778	0.106464	-0.397293	0.329098	-0.906361	-0.823207	-0.0709854	-0.699539	0.986837	0	NA	NA	-2.80321	-1.98428
102	130	Nillson_TopS	130	131	NA	-0.900916	-0.648781	1.56285	0.0748456	-0.978351	1.0689	-0.697975	-0.0693116	0.406197	1.66284	-1.22078	0.73974	0.0299567	0	NA	NA	-5.64805	12.479
87	131	Nillson_TopS	131	132	NA	1.61771	-0.578373	-0.52761	0.0253702	0.0203567	-0.245011	0.199154	0.904029	-0.0966213	-1.0516	-0.245701	-0.131656	0.56944	0	NA	NA	-2.80321	-1.98428
72	132	Nillson_TopS	132	133	NA	-0.571289	-0.154298	-0.355172	0.0864994	0.112637	0.589391	-0.694637	0.244773	-1.01059	1.0841	1.87753	0.0180221	-0.70435	0	-2381.03	-17651.3	8.83648	-17.3626
100	133	Nillson_TopS	133	134	NA	-0.784248	-0.832102	0.34402	-0.669551	-1.38868	1.54994	-1.19039	0.708407	-0.835683	2.13241	1.29168	0.860786	0.343303	0	32803.2	-10284.4	-0.457409	31.025
104	134	Nillson_TopS	134	135	NA	-0.15031	0.119674	0.64845	-0.882364	-1.40126	2.34835	-1.5306	-2.16765	-1.065	2.2994	3.07354	0.989835	0.664145	0	48548.6	-16099.4	-1.20331	25.4698
72	135	Nillson_TopS	135	136	NA	-0.698808	-0.204473	1.24296	0.835274	0.0552259	-0.0461883	-0.55512	-0.116946	-0.148766	0.268828	0.466575	-0.152691	-0.649666	0	1218.98	-6385.5	8.83648	-17.3626
90	136	Nillson_TopS	136	137	NA	1.36377	0.229752	-0.44068	0.321343	0.657002	-0.406025	0.230243	0.362273	-0.268019	-0.971183	-0.464274	-0.633795	0.427064	0	NA	NA	0.04133	-8.05116
89	137	Nillson_TopS	137	138	NA	-0.809877	0.0826576	-0.172511	0.545671	0.204704	-0.249984	0.154204	-0.815649	0.103997	0.167201	1.02916	0.542949	-0.533854	0	-229.156	-15314.3	11.2514	-19.9456
88	138	Nillson_TopS	138	139	NA	-0.357469	0.144135	0.243661	-0.788004	-1.18858	1.99514	-1.40762	-1.07778	0.0580638	1.50111	1.5676	0.30919	0.288189	0	55819.4	-16077.9	-1.47868	23.5644
87	139	Nillson_TopS	139	140	NA	1.66259	-0.089318	-0.200498	0.789345	0.285122	-0.370159	-0.0961571	-0.0139032	-0.549454	-1.01635	-0.205056	-0.474701	0.708514	0	NA	NA	-2.80321	-1.98428
90	140	Nillson_TopS	140	141	NA	1.33481	0.135667	-0.519336	-0.147569	0.569328	-0.453324	0.257938	0.0980348	0.0165946	-0.938068	-0.07677	-0.326104	0.356903	0	NA	NA	0.04133	-8.05116
101	141	Nillson_TopS	141	142	NA	1.2284	0.188495	-0.413398	-0.228265	0.611704	-0.582691	0.244308	-0.142421	-0.118917	-0.788829	0.144681	-0.0923879	0.212255	0	-49008.4	-25902.3	1.66122	-10.7159
87	142	Nillson_TopS	142	143	NA	2.01044	-0.253024	-0.502986	0.591093	0.252229	-0.0339698	0.0372818	-0.134836	-0.181641	-1.12052	-0.723379	-0.291702	0.896662	0	NA	NA	-2.80321	-1.98428
68	143	Nillson_TopS	143	144	NA	-1.21544	0.159205	1.82755	0.719789	-0.793447	0.591593	-0.792822	-0.60112	0.0954005	1.28619	-0.629213	0.552279	-0.0163126	0	NA	NA	-7.16747	12.5824
97	144	Nillson_TopS	144	145	NA	-0.774386	-0.889704	0.67928	-0.360081	-1.46023	1.42603	-0.895464	-0.577075	-0.562549	2.0379	1.85659	0.84536	0.0641987	0	39178.5	-14194.2	-0.640634	29.6106
76	145	Nillson_TopS	145	146	NA	-1.44214	-0.390267	0.512129	0.477457	-1.12502	-0.148642	0.590329	1.62167	0.5436	0.151883	-0.24079	0.604004	-0.32996	0	-5859.9	29619.8	-3.9653	1.78471
90	146	Nillson_TopS	146	147	NA	1.34752	0.11254	-0.572974	-0.190833	0.568086	-0.354965	0.0894673	0.395298	-0.0571169	-0.947682	0.00722975	-0.434472	0.365967	0	NA	NA	0.04133	-8.05116
90	147	Nillson_TopS	147	148	NA	1.46497	-0.069879	-0.514027	0.361124	0.294695	-0.36571	-0.0783369	0.675191	-0.304738	-0.903543	-0.0797172	-0.591982	0.469285	0	NA	NA	0.04133	-8.05116
81	148	Nillson_TopS	148	149	NA	0.885246	0.617522	-1.21911	0.0521502	0.866336	-0.603219	0.4269	0.431798	0.73634	-0.878441	-0.0465478	-0.48822	-0.133301	0	NA	NA	3.47305	-13.3053
78	149	Nillson_TopS	149	150	NA	1.27046	-0.185402	-0.839469	-0.142419	0.216714	-0.410805	0.315382	0.328749	-0.00539089	-0.551157	-0.00223788	-0.128013	0.440911	0	-51747.4	-27487.8	-1.47521	-5.09834
71	150	Nillson_TopS	150	151	NA	-1.09512	-0.214128	1.86079	-0.0894947	-0.214436	-0.306733	-0.259639	0.551175	1.50292	0.110591	-0.957408	0.291291	-0.356947	0	13028.5	16577.1	-7.2091	4.52457
87	151	Nillson_TopS	151	152	NA	1.88776	-0.505735	-0.188882	0.607176	-0.185712	-0.133391	-0.299444	0.204844	-0.516609	-0.89719	0.177674	-0.512915	0.840117	0	NA	NA	-2.80321	-1.98428
95	152	Nillson_TopS	152	153	NA	-0.813071	-0.180445	0.833429	-0.0891303	0.052739	-0.194101	-0.295488	1.18028	1.05298	0.290628	-1.0301	0.0687879	-0.319098	0	11881.1	18781.3	-5.89098	4.66014
71	153	Nillson_TopS	153	154	NA	-1.06864	-0.299912	2.64811	-0.151161	-0.40392	-0.462855	-0.460543	0.357865	1.38238	-0.259479	-0.807139	0.368116	0.165283	0	NA	NA	-7.2091	4.52457
90	154	Nillson_TopS	154	155	NA	1.51048	0.0779216	-0.316525	0.474925	0.694835	-0.342025	0.063269	0.623393	-0.259788	-1.18052	-0.569078	-0.712154	0.432979	0	NA	NA	0.04133	-8.05116
90	155	Nillson_TopS	155	156	NA	0.686395	0.152139	-0.567903	-0.336007	0.539867	-0.526703	0.117969	1.0153	-0.515231	-0.438129	0.907837	-0.430903	-0.261269	0	NA	NA	0.04133	-8.05116
96	156	Nillson_TopS	156	157	NA	0.214609	0.225015	-0.498395	-0.26519	0.814272	-0.778718	0.603698	0.657646	0.168244	-0.660103	0.405716	-0.0648487	-0.510419	0	-37873.4	-22053.2	5.64891	-15.0421
81	157	Nillson_TopS	157	158	NA	0.637067	0.341431	-0.572307	-0.199097	0.72808	-0.527855	0.236063	0.508663	-0.146146	-0.662672	0.513118	-0.358971	-0.242505	0	NA	NA	3.47305	-13.3053
100	158	Nillson_TopS	158	159	NA	-0.858651	-0.810746	0.22299	-0.511604	-1.49232	1.23278	-1.00583	0.389236	-0.635461	2.12702	2.21888	0.848297	-0.0809002	0	32853.9	-13815.4	-0.457409	31.025
87	159	Nillson_TopS	159	160	NA	1.70194	-0.34849	-0.478316	0.00954426	-0.119193	-0.143428	-0.268525	0.549676	-0.588458	-0.705454	0.472958	-0.325379	0.617856	0	-50431.6	-29662.2	-2.80321	-1.98428
87	160	Nillson_TopS	160	161	NA	1.13162	0.06725	-0.128505	0.839512	0.443546	-0.51604	0.0529521	0.111875	-0.151883	-1.0238	-0.0727649	-0.591131	0.172367	0	NA	NA	-2.80321	-1.98428
81	161	Nillson_TopS	161	162	NA	0.768745	0.756615	-0.906178	-0.348936	1.2525	-0.52906	0.568391	0.578479	-0.0976789	-0.632243	-0.509257	-0.437813	0.0336622	0	-43329	-22419.6	3.47305	-13.3053
90	162	Nillson_TopS	162	163	NA	1.14212	0.341461	-0.706129	-0.132249	0.911299	-0.418473	0.183535	0.332438	-0.217043	-0.664878	-0.0941367	-0.482537	0.12767	0	NA	NA	0.04133	-8.05116
75	163	Nillson_TopS	163	164	NA	1.19038	-0.817458	0.104293	0.00188147	-1.34604	-0.0134388	-0.461847	1.65417	-0.433784	0.0463208	0.796134	-0.164293	0.180773	0	-16283.8	4612.17	-3.41715	-0.207763
74	164	Nillson_TopS	164	165	NA	-0.526223	0.427078	-0.356093	-0.596994	0.716446	0.241051	-0.0155721	0.524969	-0.526989	0.82301	0.744682	-0.168549	-0.920616	0	-7710.87	-21036.3	10.1585	-18.3044
90	165	Nillson_TopS	165	166	NA	1.10502	0.353348	-0.372867	-0.127752	1.02056	-0.472058	0.12283	1.0327	-0.345183	-0.868255	-0.390338	-0.800649	0.192917	0	NA	NA	0.04133	-8.05116
95	166	Nillson_TopS	166	167	NA	-1.19303	0.0360086	1.3618	-0.36139	-0.3519	-0.133098	-0.455104	1.15156	1.91204	0.386531	-1.03817	0.262439	-0.627225	0	12445.2	18382.7	-5.89098	4.66014
90	167	Nillson_TopS	167	168	NA	0.937271	0.332444	-0.807116	0.420971	0.707781	-0.521799	0.335786	0.533172	-0.0938306	-0.880242	-0.440316	-0.187825	0.0477563	0	NA	NA	0.04133	-8.05116
90	168	Nillson_TopS	168	169	NA	0.924593	-0.231611	-0.728836	-0.348853	0.208156	-0.272887	0.262369	0.310104	0.180969	-0.571838	0.346263	-0.0487971	0.198975	0	NA	NA	0.04133	-8.05116
68	169	Nillson_TopS	169	170	NA	-0.646781	0.199981	1.46155	0.365433	-0.970805	0.359772	-0.521095	-0.0384022	-0.043768	0.800369	-0.6052	0.378147	-0.105452	0	NA	NA	-7.16747	12.5824
90	170	Nillson_TopS	170	171	NA	0.638546	0.449824	-0.308909	-0.0868291	1.05217	-0.836587	0.581435	0.279476	0.0131427	-0.746882	-0.0643426	-0.383873	-0.256665	0	NA	NA	0.04133	-8.05116
101	171	Nillson_TopS	171	172	NA	1.03832	0.496934	-0.822957	0.0733828	0.960658	-0.613587	0.503336	0.377429	0.167607	-0.975867	-0.461682	-0.4537	0.17051	0	NA	NA	1.66122	-10.7159
81	172	Nillson_TopS	172	173	NA	0.223413	0.255712	-0.345032	-0.53691	0.894701	-0.784017	0.862399	0.449908	0.597815	-0.606546	-0.585914	0.161253	-0.220165	0	NA	NA	3.47305	-13.3053
93	173	Nillson_TopS	173	174	NA	-1.20921	-0.497772	0.437868	0.0270411	-1.07793	0.217766	0.519293	1.85772	0.213309	0.792209	-0.712151	0.750272	-0.439686	0	NA	NA	-4.40299	4.80104
94	174	Nillson_TopS	174	175	NA	-0.948612	0.487476	-0.281425	-0.540203	0.903342	0.642444	0.049519	-1.66239	-0.479655	1.29957	2.01487	0.217274	-0.667984	0	NA	NA	11.5245	-18.2658
99	175	Nillson_TopS	175	176	NA	-0.503594	0.157587	0.487334	-0.127808	-0.345237	-0.365844	0.412948	1.50459	0.198617	-0.229342	-0.962237	0.225961	0.0125102	0	-3326.99	27521.5	-2.99233	5.10986
90	176	Nillson_TopS	176	177	NA	1.418	0.127958	-0.772655	0.056911	0.494316	-0.403834	0.0582398	0.153214	-0.291259	-0.667455	0.279944	-0.577373	0.461734	0	NA	NA	0.04133	-8.05116
90	177	Nillson_TopS	177	178	NA	0.953647	0.13692	-0.564319	-0.204473	0.595808	-0.474632	0.214816	0.400583	-0.153139	-0.684511	0.403392	-0.39684	0.0194213	0	NA	NA	0.04133	-8.05116
90	178	Nillson_TopS	178	179	NA	1.42429	0.370464	-0.931458	0.027681	0.900141	-0.272409	0.227419	0.563431	-0.234822	-0.759579	-0.564674	-0.580134	0.326822	0	-49659.2	-24821.1	0.04133	-8.05116
90	179	Nillson_TopS	179	180	NA	1.11559	0.183379	-0.731674	-0.225337	0.52667	-0.330702	0.107381	0.333739	-0.184618	-0.834632	0.585999	-0.355535	0.12178	0	NA	NA	0.04133	-8.05116
68	180	Nillson_TopS	180	181	NA	-1.0972	0.364557	1.77138	0.991133	-0.979534	0.329802	-0.778445	-0.0274613	-0.0216736	0.914541	-0.673143	0.418359	-0.198202	0	30250.8	23026.7	-7.16747	12.5824
68	181	Nillson_TopS	181	182	NA	-1.32286	0.18642	2.58346	0.641355	-1.10797	-0.273205	-0.574866	1.25154	0.571312	0.140812	-0.441383	0.0250035	-0.44442	0	14829	22409	-7.16747	12.5824
90	182	Nillson_TopS	182	183	NA	0.703637	0.27395	-0.43536	0.279493	0.817402	-0.659745	0.393213	0.0343358	0.138282	-0.821758	-0.199366	-0.230246	-0.0464068	0	NA	NA	0.04133	-8.05116
90	183	Nillson_TopS	183	184	NA	1.03405	0.353747	-0.861429	-0.247169	0.933986	-0.569066	0.404589	0.227646	0.0725099	-0.722704	-0.157815	-0.141987	0.0357998	0	NA	NA	0.04133	-8.05116
96	184	Nillson_TopS	184	185	NA	0.0844558	0.628347	-0.398362	-0.0583458	1.0845	-0.733718	0.408656	0.790968	0.09029	-0.684094	-0.0536543	-0.273865	-0.554878	0	-37785.3	-21499.6	5.64891	-15.0421
100	185	Nillson_TopS	185	186	NA	-1.02117	-1.02447	0.207695	-0.670439	-1.49425	1.21969	-1.03428	1.35621	-0.739359	1.88908	3.23698	0.631924	-0.531817	0	28447.9	-13967.2	-0.457409	31.025
78	186	Nillson_TopS	186	187	NA	1.497	-0.050135	-0.635019	0.245035	0.446162	-0.493834	0.0515198	0.407872	-0.138238	-0.930556	-0.311697	-0.316383	0.600943	0	-52778.7	-26892.1	-1.47521	-5.09834
95	187	Nillson_TopS	187	188	NA	-1.10578	-0.249898	1.98409	-0.312773	-0.273817	-0.262344	-0.57615	0.798234	1.22294	0.516086	-0.767969	0.16752	-0.289321	0	13273.6	17572.4	-5.89098	4.66014
88	188	Nillson_TopS	188	189	NA	-0.257063	0.206072	-0.0139094	-0.978248	-1.15279	1.90801	-1.31755	-1.51032	0.310387	1.38438	2.19554	0.372791	0.320794	0	54691.7	-16681.1	-1.47868	23.5644
94	189	Nillson_TopS	189	190	NA	-1.02428	0.690901	0.146538	-0.877219	1.18595	0.228326	0.3528	-1.80739	-0.0348892	0.791846	2.36672	-0.056773	-0.785889	0	NA	NA	11.5245	-18.2658
100	190	Nillson_TopS	190	191	NA	-1.08188	-0.912638	0.536945	-0.629653	-1.48461	1.071	-0.963046	0.79262	-0.859818	1.83724	3.03452	0.690109	-0.283069	0	30045.3	-14399.2	-0.457409	31.025
90	191	Nillson_TopS	191	192	NA	1.44271	0.036617	-0.322671	0.128514	0.590565	-0.515274	0.12633	0.537152	-0.300337	-0.781125	-0.589263	-0.408681	0.409659	0	NA	NA	0.04133	-8.05116
87	192	Nillson_TopS	192	193	NA	1.97177	0.194425	-0.53023	0.484054	0.706879	0.0258572	-0.0665624	0.160335	-0.666579	-0.994049	-0.459198	-0.957163	0.723752	0	-52350.7	-28053.5	-2.80321	-1.98428
90	193	Nillson_TopS	193	194	NA	1.21683	0.0199902	-0.57813	-0.0860624	0.384701	-0.543973	0.141057	0.0950657	-0.0592935	-0.666778	0.377148	-0.384303	0.340962	0	-50544.9	-27371.6	0.04133	-8.05116
71	194	Nillson_TopS	194	195	NA	-0.974126	-0.265738	2.33976	-0.130673	-0.339095	-0.366967	-0.415572	0.7395	1.24036	-0.283593	-0.455105	0.190401	-0.398626	0	12191.4	15332.5	-7.2091	4.52457
101	195	Nillson_TopS	195	196	NA	1.00019	0.222682	-0.527233	-0.149598	0.749831	-0.61461	0.437174	0.399213	-0.0882922	-0.630205	-0.307538	-0.246727	0.0293594	0	NA	NA	1.66122	-10.7159
69	196	Nillson_TopS	196	197	NA	-0.268274	0.256703	0.337373	-0.603681	-0.669884	2.12575	-1.07546	-1.75014	0.865537	1.90086	-0.759255	0.645466	0.418666	0	59007.7	-5138.56	-2.63306	16.7582
77	197	Nillson_TopS	197	198	NA	-0.163687	1.01442	-0.844113	-0.270882	1.53403	-0.463534	0.536341	0.352542	-0.0722199	-0.237982	0.834722	-0.600156	-1.04577	0	-29052.4	-21953.2	7.51315	-16.4179
80	198	Nillson_TopS	198	199	NA	-1.19652	-0.716115	0.983013	0.254751	-0.938036	0.423491	0.388571	0.265198	0.473153	0.878246	-0.943855	0.862594	0.0511639	0	1452.61	37416.1	-4.13488	11.909
87	199	Nillson_TopS	199	200	NA	1.48781	-0.20721	-0.388144	0.739469	0.229349	-0.36	-0.117135	0.32052	-0.258287	-0.970192	-0.127959	-0.452003	0.454384	0	NA	NA	-2.80321	-1.98428
100	200	Nillson_TopS	200	201	NA	-0.893303	-0.566173	0.0838939	-0.589706	-1.40021	1.30177	-1.07374	0.226161	-0.601762	2.01919	2.41146	0.642799	-0.0213021	0	33188.9	-14243.3	-0.457409	31.025
101	201	Nillson_TopS	201	202	NA	0.889323	0.528018	-0.753195	-0.25376	0.902738	-0.430685	0.337081	0.301329	-0.0040533	-0.398293	-0.211516	-0.424901	-0.166022	0	NA	NA	1.66122	-10.7159
72	202	Nillson_TopS	202	203	NA	-0.243243	0.343234	-0.401723	0.730638	0.857142	-0.153825	0.0074577	0.013063	-0.493808	0.339875	0.58379	-0.456413	-0.859424	0	-11714.6	-21360.5	8.83648	-17.3626
89	203	Nillson_TopS	203	204	NA	-1.14051	0.450581	0.03069	0.877657	0.887269	0.361978	-0.0575563	-1.79852	-0.533919	0.876746	1.86928	-0.164871	-0.739931	0	-1245.38	-22456.3	11.2514	-19.9456
74	204	Nillson_TopS	204	205	NA	-0.811504	0.885111	-0.525188	-0.466975	1.41582	0.118684	0.492339	-1.02983	0.167439	0.69999	0.728877	-0.162888	-0.944995	0	-2936.3	-26186.3	10.1585	-18.3044
94	205	Nillson_TopS	205	206	NA	-0.9289	0.443431	0.0293199	-0.569979	1.24563	0.464938	0.214541	-1.83796	-0.321219	1.17653	1.57232	0.0992863	-0.573714	0	1346.66	-25573.4	11.5245	-18.2658
80	206	Nillson_TopS	206	207	NA	-1.11114	-0.505743	0.17636	0.0138256	-0.926357	0.376684	0.674631	0.562104	0.518149	0.927399	-1.06049	0.904744	0.161321	0	316.006	37374.5	-4.13488	11.909
87	207	Nillson_TopS	207	208	NA	1.37311	-0.207872	-0.48907	0.0672337	0.273138	-0.281491	0.076667	0.509078	-0.340619	-0.686758	0.0564274	-0.541591	0.481412	0	-51879	-29203.9	-2.80321	-1.98428
101	208	Nillson_TopS	208	209	NA	0.999888	0.493484	-0.531709	-0.314508	0.93268	-0.357939	0.198923	-0.00526867	-0.165965	-0.559281	0.140599	-0.61864	0.0731446	0	NA	NA	1.66122	-10.7159
78	209	Nillson_TopS	209	210	NA	1.52154	0.22448	-0.439642	0.452359	0.723001	-0.438313	0.13475	0.266701	-0.181408	-1.10813	-0.648069	-0.552168	0.494302	0	-51838.5	-25162	-1.47521	-5.09834
88	210	Nillson_TopS	210	211	NA	-0.407136	0.231654	0.932772	-1.01946	-1.12233	1.82051	-1.40748	-1.41173	0.693396	1.16188	1.71169	0.20792	0.00229171	0	54470.6	-16385.1	-1.47868	23.5644
86	211	Nillson_TopS	211	212	NA	-1.19277	-0.515956	0.74331	1.05096	-0.713222	-0.0817696	0.404314	0.622258	0.499453	0.344522	-0.719757	0.780278	-0.525826	0	NA	NA	-4.2936	8.20126
80	212	Nillson_TopS	212	213	NA	-0.835881	-0.544268	0.499235	0.45954	-0.781728	0.421389	0.207231	-0.164242	0.114008	0.92029	-0.97907	0.70126	0.54884	0	4276.91	38122.9	-4.13488	11.909
85	213	Nillson_TopS	213	214	NA	2.98375	-0.737486	1.41203	0.595824	-1.31858	1.19045	-1.7395	-0.77467	-1.18476	1.37918	-0.986074	0.082148	1.7515	0	26187.6	19229.6	-6.1752	13.2135
76	214	Nillson_TopS	214	215	NA	-1.41915	-0.806106	0.831333	1.22508	-1.01262	-0.248829	0.267066	0.814303	0.419145	0.295068	0.683676	0.433712	-0.611531	0	-5586.96	25390.1	-3.9653	1.78471
90	215	Nillson_TopS	215	216	NA	1.23182	0.307078	-0.771258	0.312245	0.84146	-0.481835	0.345616	0.404829	0.0400719	-0.809162	-0.736171	-0.378479	0.134577	0	NA	NA	0.04133	-8.05116
74	216	Nillson_TopS	216	217	NA	-0.799102	0.71426	-0.252544	-0.159048	1.225	0.17021	0.298054	-1.57234	-0.358352	0.723868	1.41149	-0.0398115	-0.681734	0	-751.322	-25924.8	10.1585	-18.3044
78	217	Nillson_TopS	217	218	NA	1.77741	-0.0230821	-0.760936	0.224593	0.606295	-0.0684108	0.136856	0.00791123	-0.265923	-1.09668	-0.15386	-0.621878	0.719971	0	-53359.2	-27160.5	-1.47521	-5.09834
90	218	Nillson_TopS	218	219	NA	1.33544	0.102829	-0.450185	0.0251373	0.653678	-0.366766	0.0706529	0.170099	-0.417634	-0.825314	0.164983	-0.467807	0.309371	0	NA	NA	0.04133	-8.05116
94	219	Nillson_TopS	219	220	NA	-1.1112	0.683334	0.345498	-0.739466	1.0135	0.41131	0.178164	-2.39329	-0.133867	1.01341	3.22067	0.0926454	-0.801275	0	4375.09	-24039.3	11.5245	-18.2658
90	220	Nillson_TopS	220	221	NA	1.25297	-0.00752877	-0.573803	0.162411	0.504925	-0.421757	0.247753	0.0933519	-0.201788	-0.906907	0.250816	-0.350326	0.237845	0	NA	NA	0.04133	-8.05116
81	221	Nillson_TopS	221	222	NA	0.853259	0.559285	-0.488262	-0.16117	1.16177	-0.696389	0.459243	0.13172	0.0625389	-0.893742	-0.118477	-0.441488	-0.06822	0	NA	NA	3.47305	-13.3053
102	222	Nillson_TopS	222	223	NA	-1.02107	-0.450588	1.42227	0.0366036	-1.00301	0.913794	-0.898664	0.221028	0.324984	1.73248	-1.06771	0.556092	0.275837	0	NA	NA	-5.64805	12.479
74	223	Nillson_TopS	223	224	NA	-0.994029	0.767332	-0.152226	0.406025	1.13305	0.0865919	0.131161	-0.979359	-0.440288	0.666158	1.13526	-0.220441	-1.01801	0	-4262.34	-23617.9	10.1585	-18.3044
84	224	Nillson_TopS	224	225	NA	-1.08192	-0.622681	1.34776	0.366171	-1.1179	0.58812	0.247084	-0.630177	0.355419	0.995716	-0.636434	0.834719	0.234402	0	7354.98	36211.9	-3.02112	14.8073
95	225	Nillson_TopS	225	226	NA	-1.1276	0.0589111	1.02428	-0.28182	-0.369108	-0.0872453	-0.0729709	1.22769	1.70517	0.496549	-1.33353	0.363865	-0.645663	0	12166.1	18638.2	-5.89098	4.66014
87	226	Nillson_TopS	226	227	NA	1.90244	-0.24471	-0.274908	0.304607	0.237979	-0.176555	-0.120026	0.377263	-0.418956	-0.921757	-0.497078	-0.535041	0.816766	0	NA	NA	-2.80321	-1.98428
101	227	Nillson_TopS	227	228	NA	0.681303	0.107379	-0.790311	-0.275922	0.646445	-0.544656	0.410248	0.647072	-0.17042	-0.528221	0.343959	-0.151163	-0.0852963	0	-42819.7	-24677.1	1.66122	-10.7159
94	228	Nillson_TopS	228	229	NA	-0.883443	1.18628	-0.489575	-0.545543	1.5612	0.343787	0.650293	-1.82775	-0.0562183	0.839698	0.788561	-0.0695636	-0.614103	0	-1888.38	-26742.5	11.5245	-18.2658
104	229	Nillson_TopS	229	230	NA	-0.171406	0.347037	0.166744	-0.767719	-1.27594	2.19713	-1.30684	-1.95415	-0.57948	1.84659	2.8207	0.418404	0.487982	0	48780.2	-16625.1	-1.20331	25.4698
87	230	Nillson_TopS	230	231	NA	1.38881	-0.0690623	-0.682775	-0.102242	0.504895	-0.315991	0.0732071	0.598803	-0.195499	-0.720102	-0.0818444	-0.444846	0.376459	0	NA	NA	-2.80321	-1.98428
90	231	Nillson_TopS	231	232	NA	0.298111	0.225969	-0.445452	0.0602313	0.608017	-0.578476	0.262904	0.731561	-0.00159285	-0.72721	0.463756	-0.237819	-0.437245	0	NA	NA	0.04133	-8.05116
90	232	Nillson_TopS	232	233	NA	1.23218	0.23857	-0.305578	-0.123217	0.591627	-0.175754	0.00972223	0.638651	-0.453901	-0.767728	-0.386177	-0.534117	0.33462	0	NA	NA	0.04133	-8.05116
68	233	Nillson_TopS	233	234	NA	-0.970083	0.244644	1.59182	0.80567	-1.00341	0.227588	-0.571876	-0.255052	-0.095266	1.08519	-0.71338	0.29096	0.222288	0	NA	NA	-7.16747	12.5824
93	234	Nillson_TopS	234	235	NA	-1.22005	-0.620066	0.649203	-0.213343	-1.0676	0.576731	0.213624	1.52259	0.339065	0.665562	-0.183988	0.411948	-0.369573	0	-5780.38	30098.1	-4.40299	4.80104
90	235	Nillson_TopS	235	236	NA	1.25455	-0.0227986	-0.640858	0.0361047	0.422672	-0.47757	0.239994	-0.0104167	-0.00980718	-0.85858	0.356791	-0.337101	0.350447	0	NA	NA	0.04133	-8.05116
87	236	Nillson_TopS	236	237	NA	2.2562	-0.35	-0.426082	0.449426	0.0445638	0.082604	-0.336973	0.520143	-0.802215	-0.869726	-0.00934896	-0.927744	1.04994	0	NA	NA	-2.80321	-1.98428
96	237	Nillson_TopS	237	238	NA	0.24069	0.974398	-0.629961	-0.298232	1.68775	-0.725671	0.765348	0.121067	0.239586	-0.523558	-0.0323694	-0.467017	-0.814941	0	-37245.7	-20428.4	5.64891	-15.0421
87	238	Nillson_TopS	238	239	NA	2.15673	-0.488649	0.098082	0.576315	-0.0230467	-0.253421	-0.671302	0.709987	-0.741848	-0.705538	-0.031985	-0.821161	0.857157	0	NA	NA	-2.80321	-1.98428
90	239	Nillson_TopS	239	240	NA	1.29806	-0.0522936	-0.467357	-0.206864	0.498171	-0.298565	0.216187	0.294282	-0.106552	-0.851929	-0.0222922	-0.325659	0.293446	0	NA	NA	0.04133	-8.05116
103	240	Nillson_TopS	240	241	NA	-0.177791	-0.212114	0.423753	-0.482697	-1.20546	2.2345	-1.12189	-1.69227	-0.688775	2.70736	0.358407	1.23386	0.441076	0	56037	-12037.8	-1.77317	21.6487
90	241	Nillson_TopS	241	242	NA	1.20999	0.043639	-0.584149	0.0863908	0.587394	-0.561173	0.431146	0.233644	-0.127203	-0.896091	-0.091037	-0.201888	0.168556	0	NA	NA	0.04133	-8.05116
77	242	Nillson_TopS	242	243	NA	-0.0977745	0.969053	-0.221568	0.262995	1.34075	-0.642086	0.380258	0.485813	-0.20309	-0.755459	0.615731	-0.740607	-0.907679	0	-30862	-21803.1	7.51315	-16.4179
94	243	Nillson_TopS	243	244	NA	-1.16166	0.162133	-0.114902	0.198696	0.7115	0.545207	-0.119302	-1.19921	-0.538558	1.06705	1.88973	0.165583	-0.853862	0	597.426	-23164.4	11.5245	-18.2658
90	244	Nillson_TopS	244	245	NA	0.698305	0.242475	-0.178379	-0.227489	0.722368	-0.562637	0.197181	0.395505	-0.299606	-0.589722	0.148569	-0.26728	-0.0870975	0	NA	NA	0.04133	-8.05116
81	245	Nillson_TopS	245	246	NA	0.491834	0.609872	-0.332562	-0.558906	1.06473	-0.648439	0.372168	-0.0991733	0.0310541	-0.497032	0.460595	-0.323943	-0.272818	0	-39234.6	-22489.7	3.47305	-13.3053
72	246	Nillson_TopS	246	247	NA	-0.537543	0.416498	-0.589479	0.0533665	0.803227	0.0328218	-0.0971086	0.391593	-0.319329	0.442505	0.919853	-0.393279	-0.84842	0	-9592.15	-21027.2	8.83648	-17.3626
78	247	Nillson_TopS	247	248	NA	1.25245	-0.100176	-0.469518	0.0395206	0.309747	-0.295806	0.113534	0.0842758	-0.11708	-0.607417	0.0599831	-0.304651	0.234512	0	-52810.5	-27833.6	-1.47521	-5.09834
79	248	Nillson_TopS	248	249	NA	0.125404	-0.0165145	-0.0883994	-0.382935	-1.00839	2.52599	-0.88513	-1.76592	-0.439826	2.78438	-1.01257	1.13316	1.00919	0	62294.1	-10288.8	-2.18619	19.1368
95	249	Nillson_TopS	249	250	NA	-0.935704	-0.284609	1.9271	-0.271372	-0.23395	-0.203507	-0.356206	0.787023	1.13746	0.185196	-0.744646	0.216692	-0.521019	0	12600.2	16994	-5.89098	4.66014
81	250	Nillson_TopS	250	251	NA	0.138098	0.961561	-0.641903	-0.290062	1.4439	-0.587691	0.893209	-0.104634	0.298466	-0.719924	-0.173819	-0.100842	-0.6624	0	-37663.7	-20450.6	3.47305	-13.3053
80	251	Nillson_TopS	251	252	NA	-1.06967	-0.480829	0.841158	0.043436	-1.01355	0.541212	0.576931	0.121704	0.406127	1.12657	-1.03839	0.814384	-0.0641679	0	2416.4	38111.8	-4.13488	11.909
89	252	Nillson_TopS	252	253	NA	-1.07467	0.492795	-0.176143	0.370787	0.95985	0.585959	0.124649	-1.62902	-0.287498	1.17235	0.573967	0.270357	-0.699811	0	-1616.06	-24666.8	11.2514	-19.9456
90	253	Nillson_TopS	253	254	NA	0.952512	0.0759193	-0.218483	0.182895	0.602112	-0.507146	0.210307	0.401788	-0.187279	-0.856294	-0.0424987	-0.45888	0.0737886	0	NA	NA	0.04133	-8.05116
77	254	Nillson_TopS	254	255	NA	0.0739277	0.743674	-0.709063	0.194036	1.41487	-0.620143	0.354318	0.596282	-0.271418	-0.282165	0.159922	-0.603005	-0.6361	0	-30367.6	-22177.9	7.51315	-16.4179
87	255	Nillson_TopS	255	256	NA	2.17725	-0.598218	-0.491432	0.29983	-0.284314	0.141617	-0.41803	0.952998	-0.955898	-0.50188	0.114378	-0.644035	0.887019	0	NA	NA	-2.80321	-1.98428
91	256	Nillson_TopS	256	257	NA	0.500326	-0.986188	0.691886	1.45764	-1.04043	-0.159745	0.0259061	-0.659578	0.0241563	0.101597	0.380576	0.33862	-0.05462	0	-7800.99	15627.7	-3.17219	1.32407
81	257	Nillson_TopS	257	258	NA	0.748821	0.479967	-0.75423	-0.441647	0.828769	-0.543783	0.406088	-0.168158	0.0911056	-0.428045	0.488916	-0.294888	-0.117522	0	NA	NA	3.47305	-13.3053
71	258	Nillson_TopS	258	259	NA	-0.900945	-0.27448	3.1762	-0.276862	-0.264236	-0.616807	-0.250657	-0.494291	1.44365	-0.652416	-0.910095	0.672429	0.485335	0	14303.6	11370.5	-7.2091	4.52457
71	259	Nillson_TopS	259	260	NA	-0.628161	-0.450441	2.2787	-0.143867	-0.461108	-0.247135	-0.361957	-0.210888	1.39475	-0.0375455	-0.816696	0.432496	-0.0286772	0	13978.4	13452.2	-7.2091	4.52457
87	260	Nillson_TopS	260	261	NA	1.82529	-0.30496	-0.323682	0.158505	0.427704	-0.43695	0.119083	0.433158	-0.376353	-1.03528	-0.181892	-0.393223	0.537395	0	NA	NA	-2.80321	-1.98428
90	261	Nillson_TopS	261	262	NA	1.52763	0.119334	-0.481351	-0.0691453	0.385427	-0.343566	0.0786783	0.345289	-0.285852	-0.981049	0.159322	-0.516039	0.402513	0	NA	NA	0.04133	-8.05116
101	262	Nillson_TopS	262	263	NA	0.746997	0.683124	-0.841727	-0.25419	1.09665	-0.450402	0.347397	0.361994	-0.182489	-0.760314	0.295359	-0.480575	-0.168535	0	NA	NA	1.66122	-10.7159
90	263	Nillson_TopS	263	264	NA	1.22902	0.154054	-0.555079	0.0550671	0.923564	-0.318128	0.168277	0.0384685	-0.341246	-0.736959	0.124664	-0.646366	0.241712	0	NA	NA	0.04133	-8.05116
103	264	Nillson_TopS	264	265	NA	-0.0273092	0.00784663	-0.00494545	-0.808818	-1.07965	2.41798	-0.858041	-1.8456	-0.492703	2.63175	-0.456808	1.43194	0.930971	0	60752.9	-11095.7	-1.77317	21.6487
75	265	Nillson_TopS	265	266	NA	0.288355	-0.794814	0.400002	0.10224	-1.2719	-0.145391	-0.205776	2.01899	-0.287627	0.211063	0.180211	0.0920886	0.0343543	0	-15362.7	7020.97	-3.41715	-0.207763
87	266	Nillson_TopS	266	267	NA	1.87077	-0.277107	-0.105076	0.397825	0.159063	-0.0935007	0.0562049	-0.286917	-0.388441	-1.03601	-0.264416	-0.301738	0.663114	0	NA	NA	-2.80321	-1.98428
90	267	Nillson_TopS	267	268	NA	0.843035	0.331975	-0.576199	-0.129166	0.682713	-0.400195	0.16202	0.506856	-0.110706	-0.753997	0.101697	-0.50505	0.106311	0	NA	NA	0.04133	-8.05116
90	268	Nillson_TopS	268	269	NA	1.54267	-0.00759622	-0.508289	0.353002	0.446611	-0.197071	0.000402104	0.479914	-0.447202	-0.947922	0.000486356	-0.717172	0.387297	0	NA	NA	0.04133	-8.05116
76	269	Nillson_TopS	269	270	NA	-1.24681	-0.656108	0.261063	1.14671	-1.08354	-0.29329	0.246896	0.537167	0.313939	0.360557	0.792227	0.60309	-0.292419	0	-5598.18	25098.8	-3.9653	1.78471
90	270	Nillson_TopS	270	271	NA	1.20724	0.0457924	-0.872285	-0.302467	0.57552	-0.0820425	0.165131	0.287673	-0.0937526	-0.765625	-0.243791	-0.261287	0.690501	0	-48878	-25078.9	0.04133	-8.05116
87	271	Nillson_TopS	271	272	NA	1.90637	-0.208455	-0.399241	0.546781	0.205759	-0.146956	-0.236649	0.699004	-0.633334	-1.03618	-0.204305	-0.683633	0.732717	0	NA	NA	-2.80321	-1.98428
94	272	Nillson_TopS	272	273	NA	-1.28024	-0.116221	-0.164066	0.218621	-0.292092	0.190685	0.560961	-2.36284	0.866982	0.73969	1.49137	1.38566	-0.062096	0	NA	NA	11.5245	-18.2658
87	273	Nillson_TopS	273	274	NA	1.92365	-0.467065	-1.03043	0.261508	0.0759842	-0.112016	0.0395691	0.525109	-0.141814	-1.02471	-0.0668351	-0.177945	0.770836	0	-53019.7	-29418.6	-2.80321	-1.98428
90	274	Nillson_TopS	274	275	NA	1.09411	0.346811	-0.506197	-0.0916798	0.773819	-0.513012	0.267218	0.553309	-0.0643125	-0.970987	-0.226438	-0.490473	0.16322	0	-47388.7	-24747.1	0.04133	-8.05116
81	275	Nillson_TopS	275	276	NA	0.399252	0.751692	-0.686339	0.0255608	1.33917	-0.562507	0.3685	0.323107	-0.496647	-0.178878	0.187519	-0.699646	-0.391061	0	NA	NA	3.47305	-13.3053
89	276	Nillson_TopS	276	277	NA	-1.03256	0.557671	0.384207	1.39616	1.06069	0.155326	0.289923	-1.97434	-0.553474	0.814762	1.04059	-0.0126449	-1.05515	0	-2415.2	-21746.7	11.2514	-19.9456
81	277	Nillson_TopS	277	278	NA	0.575791	0.500119	-0.43509	-0.392629	1.04057	-0.609382	0.417335	0.493502	-0.0104102	-0.606852	-0.0343179	-0.460508	-0.177872	0	-41163.5	-22856.8	3.47305	-13.3053
90	278	Nillson_TopS	278	279	NA	1.21866	0.483054	-0.38969	0.0283959	1.00362	-0.515837	0.198374	0.55228	-0.219974	-1.1041	-0.228035	-0.768706	0.192005	0	NA	NA	0.04133	-8.05116
87	279	Nillson_TopS	279	280	NA	1.76654	-0.27019	-0.483553	0.315359	0.346414	-0.162281	-0.0247278	0.171272	-0.316855	-0.906326	-0.408976	-0.378996	0.756349	0	NA	NA	-2.80321	-1.98428
102	280	Nillson_TopS	280	281	NA	-0.821187	-0.308734	1.97002	-0.304418	-0.813375	0.686096	-0.54103	-0.434968	0.680766	1.23719	-1.03586	0.671036	-0.108491	0	26325.9	16255.3	-5.64805	12.479
90	281	Nillson_TopS	281	282	NA	1.45086	-0.172845	-0.788641	0.437969	0.24785	-0.389529	0.214497	0.468735	-0.300345	-0.791028	0.11407	-0.44285	0.350373	0	NA	NA	0.04133	-8.05116
68	282	Nillson_TopS	282	283	NA	-1.02391	0.0375493	1.51378	0.900486	-0.760111	0.255279	-0.730574	-0.270917	0.0384072	1.19263	-0.559323	0.419973	-0.151369	0	NA	NA	-7.16747	12.5824
74	283	Nillson_TopS	283	284	NA	-1.02664	0.707855	-0.287451	-0.173054	1.26348	0.113088	0.286802	-1.14867	-0.057346	0.826114	1.03931	0.0420289	-0.958642	0	-2342.98	-26062.8	10.1585	-18.3044
77	284	Nillson_TopS	284	285	NA	0.221186	0.698377	-0.618962	0.216662	1.10578	-0.428767	0.128582	0.191638	-0.427267	-0.121752	0.578268	-0.596375	-0.64355	0	-25053.1	-22120.6	7.51315	-16.4179
74	285	Nillson_TopS	285	286	NA	-1.00528	0.429173	-0.437139	0.168743	0.885734	0.596654	-0.0444618	-1.47597	-0.39179	1.14731	1.5153	0.0984524	-0.774775	0	-243.022	-24440.9	10.1585	-18.3044
89	286	Nillson_TopS	286	287	NA	-1.18021	0.371669	-0.117496	0.277363	0.882907	0.401626	0.0631464	-1.59666	-0.410364	1.1324	1.40127	0.126465	-0.633302	0	-339.883	-24121	11.2514	-19.9456
71	287	Nillson_TopS	287	288	NA	-1.30344	-0.408181	3.34145	-0.350207	-0.428254	-0.465212	-0.0821573	-0.40573	1.5814	-0.638951	-0.763794	0.77143	0.440184	0	NA	NA	-7.2091	4.52457
87	288	Nillson_TopS	288	289	NA	1.33343	-0.291004	0.238594	0.317967	0.329385	-0.423507	0.00787785	0.122087	-0.352515	-0.870119	-0.145815	-0.410406	0.41556	0	-51407.2	-27600.7	-2.80321	-1.98428
101	289	Nillson_TopS	289	290	NA	1.12522	0.694347	-0.735054	-0.0540351	1.16898	-0.467637	0.385623	0.196609	0.0407312	-0.931998	-0.259637	-0.757993	0.0672448	0	NA	NA	1.66122	-10.7159
71	290	Nillson_TopS	290	291	NA	-1.3347	-0.24438	3.03725	-0.359908	-0.210389	-0.552091	-0.147646	-0.138896	1.47495	-0.418694	-0.967104	0.685069	0.312952	0	14320.4	12745.1	-7.2091	4.52457
83	291	Nillson_TopS	291	292	NA	-1.07832	-0.754641	0.769401	-0.298422	-1.41468	1.14585	-0.909315	-0.751865	-0.464381	2.05456	3.21015	0.852105	-0.470362	0	36860.3	-14592.3	-0.90395	27.6653
90	292	Nillson_TopS	292	293	NA	0.979487	0.220001	-0.32978	0.332931	0.749255	-0.551179	0.142815	0.362298	-0.0765195	-0.91859	-0.120517	-0.563289	0.0510016	0	NA	NA	0.04133	-8.05116
92	293	Nillson_TopS	293	294	NA	0.321317	1.18928	-0.58262	-0.219129	1.71361	-0.680248	0.778863	0.338774	0.152802	-0.777257	-0.408771	-0.620071	-0.642484	0	-38378.3	-20429.1	2.70687	-14.5254
90	294	Nillson_TopS	294	295	NA	1.72597	-0.0967045	-0.391767	0.422742	0.274311	-0.178551	-0.188359	0.842416	-0.613181	-0.941425	-0.0618156	-0.865756	0.570026	0	NA	NA	0.04133	-8.05116
100	295	Nillson_TopS	295	296	NA	-0.927376	-0.633676	0.796341	-0.731576	-1.35379	1.15387	-1.52839	0.0242703	-0.51913	2.02378	2.91722	0.716086	-0.0274452	0	34165.3	-14688.6	-0.457409	31.025
74	296	Nillson_TopS	296	297	NA	-1.05608	0.336637	0.00578792	0.00212393	0.962111	0.513497	0.0150385	-1.38489	-0.331345	1.1158	1.2059	0.145229	-0.868783	0	-370.15	-24417.6	10.1585	-18.3044
94	297	Nillson_TopS	297	298	NA	-1.0218	0.780826	-0.0713406	-0.672628	1.29514	0.495283	0.375799	-1.97506	-0.0522063	1.01396	1.76139	-0.0516372	-0.728983	0	NA	NA	11.5245	-18.2658
90	298	Nillson_TopS	298	299	NA	1.02249	0.120985	-0.449503	-0.0257744	0.713763	-0.365897	0.27066	0.241725	-0.188126	-0.686199	-0.261346	-0.351511	0.17696	0	NA	NA	0.04133	-8.05116
90	299	Nillson_TopS	299	300	NA	1.25857	-0.00288293	-0.390404	0.516535	0.253022	-0.511319	0.0698168	0.280713	-0.240024	-0.757106	0.0986486	-0.492731	0.187139	0	NA	NA	0.04133	-8.05116
90	300	Nillson_TopS	300	301	NA	1.40356	0.128909	-0.546103	0.450448	0.517884	-0.500867	-0.00522514	0.720896	-0.326116	-1.02048	-0.13986	-0.640403	0.372405	0	NA	NA	0.04133	-8.05116
90	301	Nillson_TopS	301	302	NA	1.64975	-0.0157625	-0.712865	0.38033	0.463077	-0.317797	-0.0428124	0.348488	-0.343408	-0.971919	0.168724	-0.606424	0.424738	0	-51723.6	-28466.1	0.04133	-8.05116
81	302	Nillson_TopS	302	303	NA	0.525919	0.384091	-0.713996	-0.466265	0.885569	-0.498216	0.442168	0.859585	-0.0672806	-0.602102	0.165098	-0.257073	-0.317668	0	NA	NA	3.47305	-13.3053
101	303	Nillson_TopS	303	304	NA	0.660301	0.124022	-0.696476	-0.389722	0.613961	-0.526207	0.446026	0.666453	0.110316	-0.546641	-0.0858373	-0.0352346	-0.0972425	0	-42918.7	-23891	1.66122	-10.7159
94	304	Nillson_TopS	304	305	NA	-0.98364	0.319315	0.0836113	-0.124527	0.785099	0.709957	-0.065378	-2.10704	-0.472688	1.49438	1.70825	0.368324	-0.431361	0	1269.09	-24125.7	11.5245	-18.2658
90	305	Nillson_TopS	305	306	NA	1.20533	0.545382	-0.852167	0.0242931	0.967284	-0.513042	0.26188	0.227739	-0.13683	-0.831279	0.0276141	-0.716331	0.221533	0	NA	NA	0.04133	-8.05116
90	306	Nillson_TopS	306	307	NA	1.64888	0.319738	-0.874761	0.00470649	0.846455	-0.221939	0.320641	0.0805116	-0.0416136	-0.84657	-0.773859	-0.508875	0.587865	0	NA	NA	0.04133	-8.05116
94	307	Nillson_TopS	307	308	NA	-1.01315	0.898249	0.186162	-0.723901	1.16908	0.240929	0.325436	-2.28483	-0.0771318	0.931113	2.89737	-0.0310054	-0.818521	0	3616.23	-25496.6	11.5245	-18.2658
99	308	Nillson_TopS	308	309	NA	-1.34109	0.837231	0.392556	-0.303343	-0.629172	-0.313294	0.585581	1.7128	0.620543	0.139657	-1.05932	0.646324	-0.412209	0	-2751.24	25834.2	-2.99233	5.10986
90	309	Nillson_TopS	309	310	NA	0.789666	-0.105307	-0.501664	0.165885	0.365338	-0.637355	0.218128	0.608565	0.227543	-0.81957	0.0850748	-0.197863	0.0415035	0	NA	NA	0.04133	-8.05116
90	310	Nillson_TopS	310	311	NA	1.09788	0.0116004	-0.690176	-0.284765	0.383314	-0.448491	0.362711	0.446307	-0.0623427	-0.637612	0.0685845	-0.2508	0.27518	0	NA	NA	0.04133	-8.05116
87	311	Nillson_TopS	311	312	NA	1.37566	-0.151586	-0.704149	-0.0672498	0.291117	-0.296359	0.140535	0.057409	-0.127881	-0.785664	0.213207	-0.192248	0.542681	0	NA	NA	-2.80321	-1.98428
71	312	Nillson_TopS	312	313	NA	-1.10843	-0.339693	3.2893	-0.285611	-0.233737	-0.673155	-0.0809565	-0.307457	1.5731	-0.481907	-1.12984	0.768597	0.378392	0	14405.2	12226.4	-7.2091	4.52457
76	313	Nillson_TopS	313	314	NA	-1.27835	-0.785909	0.536126	0.0731446	-0.999849	0.169469	0.498533	0.253199	0.56166	0.583594	0.312575	0.82003	-0.138148	0	-4118.36	28894	-3.9653	1.78471
91	314	Nillson_TopS	314	315	NA	-0.118532	-1.06705	0.457234	1.43289	-1.01021	-0.390116	0.125828	0.509876	0.0134491	0.105945	0.572935	0.216438	-0.245848	0	-7575.13	17240.5	-3.17219	1.32407
94	315	Nillson_TopS	315	316	NA	-0.610019	0.465102	0.224411	-0.787385	0.715666	0.499036	-0.124152	-1.80906	-0.59984	1.01269	2.47994	0.0942916	-0.572725	0	NA	NA	11.5245	-18.2658
76	316	Nillson_TopS	316	317	NA	-1.33162	-0.781587	0.401291	0.435132	-0.938841	0.0380545	0.51584	0.999639	0.295276	0.190729	0.520622	0.6552	-0.33755	0	NA	NA	-3.9653	1.78471
78	317	Nillson_TopS	317	318	NA	1.37702	0.192486	-0.72094	-0.0829017	0.645745	-0.406881	0.23373	-0.208122	-0.0988213	-0.796296	0.350603	-0.501059	0.362048	0	NA	NA	-1.47521	-5.09834
81	318	Nillson_TopS	318	319	NA	0.451037	0.578376	-0.360657	-0.313499	1.19534	-0.653015	0.459135	1.05259	-0.0536598	-0.619346	-0.387046	-0.563324	-0.390212	0	NA	NA	3.47305	-13.3053
101	319	Nillson_TopS	319	320	NA	0.991064	0.439323	-0.760075	-0.205771	1.00083	-0.436487	0.351354	0.107964	0.0621635	-0.758271	0.0204175	-0.472404	-0.00982828	0	NA	NA	1.66122	-10.7159
88	320	Nillson_TopS	320	321	NA	-0.315731	0.26204	-0.325965	-0.709351	-1.07743	2.09042	-1.29351	-1.73444	0.465502	1.55761	2.21791	0.432837	0.0884567	0	55008.5	-16433.6	-1.47868	23.5644
71	321	Nillson_TopS	321	322	NA	-1.09011	-0.220932	3.05534	-0.361723	-0.518199	-0.479247	-0.126008	-0.210488	1.59536	-0.78942	-0.688748	0.562694	0.489123	0	14307.2	11931.1	-7.2091	4.52457
90	322	Nillson_TopS	322	323	NA	0.984938	0.0184765	-0.375684	-0.126257	0.439053	-0.571962	0.387659	0.47877	0.199687	-0.74557	-0.17749	-0.341074	0.0680623	0	NA	NA	0.04133	-8.05116
76	323	Nillson_TopS	323	324	NA	-1.0761	-0.674632	0.489025	0.75777	-0.873006	-0.257057	0.624169	-0.142319	0.43171	0.345196	0.436653	0.691289	-0.23751	0	-4172.43	25446.2	-3.9653	1.78471
90	324	Nillson_TopS	324	325	NA	1.12894	0.308387	-0.682318	-0.220034	0.821799	-0.446604	0.304916	0.195501	-0.0134635	-0.846386	-0.107911	-0.274191	0.156613	0	NA	NA	0.04133	-8.05116
71	325	Nillson_TopS	325	326	NA	-1.23971	-0.441731	2.51809	-0.217277	-0.220129	-0.262961	-0.0581723	0.263487	1.36309	-0.118405	-0.682395	0.0279128	0.000833188	0	13375.2	14676.5	-7.2091	4.52457
78	326	Nillson_TopS	326	327	NA	1.52005	-0.0907388	-0.64076	0.646621	0.370042	-0.362954	0.168102	0.16864	-0.264175	-0.96785	-0.368736	-0.370429	0.594778	0	-53396.7	-27262.5	-1.47521	-5.09834
94	327	Nillson_TopS	327	328	NA	-0.908089	0.600198	0.194885	-0.661855	0.920657	0.31316	0.236424	-1.97576	-0.288378	1.01663	2.05252	0.143722	-0.550254	0	3332.16	-25116.9	11.5245	-18.2658
94	328	Nillson_TopS	328	329	NA	-1.05283	0.651327	0.0998221	-0.692556	1.18989	0.400367	0.261619	-2.2514	-0.105981	1.02876	2.6502	0.0886749	-0.711316	0	NA	NA	11.5245	-18.2658
93	329	Nillson_TopS	329	330	NA	-1.397	-0.522455	0.886439	0.26831	-1.17128	0.0603352	0.291858	2.0472	0.373032	0.489155	-0.767053	0.560109	-0.137741	0	-5098.12	30972.6	-4.40299	4.80104
90	330	Nillson_TopS	330	331	NA	1.40957	0.138001	-0.823489	-0.121184	0.548007	-0.455592	0.160679	0.610931	0.025504	-0.930452	-0.114325	-0.458021	0.433248	0	NA	NA	0.04133	-8.05116
94	331	Nillson_TopS	331	332	NA	-1.07008	0.510785	-0.328277	-0.569724	0.967983	0.570628	0.0866376	-2.02406	-0.413991	1.13381	2.71823	0.212974	-0.451316	0	3431.2	-24721.5	11.5245	-18.2658
90	332	Nillson_TopS	332	333	NA	1.23458	0.199382	-0.615213	-0.218281	0.537218	-0.346139	-0.00530939	0.157197	-0.338552	-0.601859	0.65637	-0.492405	0.107655	0	NA	NA	0.04133	-8.05116
90	333	Nillson_TopS	333	334	NA	1.04656	0.00653039	-0.521751	0.24357	0.552199	-0.429383	0.100986	0.49429	-0.2637	-0.641448	-0.00495108	-0.533826	0.204065	0	NA	NA	0.04133	-8.05116
90	334	Nillson_TopS	334	335	NA	1.71493	-0.0235402	-0.411307	0.565817	0.294788	-0.240404	-0.0790478	0.476588	-0.497385	-0.850361	-0.381651	-0.697838	0.564365	0	NA	NA	0.04133	-8.05116
90	335	Nillson_TopS	335	336	NA	1.12513	0.345789	-0.739881	-0.0252816	0.848165	-0.462534	0.416862	0.239843	-0.180307	-0.827058	-0.196847	-0.448543	0.271937	0	NA	NA	0.04133	-8.05116
81	336	Nillson_TopS	336	337	NA	1.04084	0.41831	-0.597148	-0.295976	0.900719	-0.56688	0.437125	0.0152804	0.212598	-0.767408	-0.23747	-0.241884	0.00577158	0	NA	NA	3.47305	-13.3053
79	337	Nillson_TopS	337	338	NA	-0.0679821	0.0999326	0.230818	-0.544856	-1.07835	2.45069	-1.00867	-1.52324	-0.640473	2.70436	-0.873901	1.33274	0.665143	0	61559	-10200.6	-2.18619	19.1368
90	338	Nillson_TopS	338	339	NA	0.724738	0.281312	-0.282542	-0.1796	0.707815	-0.515565	0.33827	0.129602	-0.14975	-0.789088	0.19251	-0.170764	-0.0854894	0	NA	NA	0.04133	-8.05116
81	339	Nillson_TopS	339	340	NA	0.314172	0.116387	-0.26965	0.685049	0.709314	-0.783744	0.470727	0.28967	0.155311	-0.800627	-0.136798	0.0482467	-0.515423	0	NA	NA	3.47305	-13.3053
87	340	Nillson_TopS	340	341	NA	2.11261	-0.32263	-0.780744	0.460773	0.147537	-0.0896533	-0.177152	0.304347	-0.600406	-0.900474	0.187236	-0.677754	0.908224	0	-51853.9	-30223.2	-2.80321	-1.98428
81	341	Nillson_TopS	341	342	NA	0.51878	0.328807	-0.631324	-0.47109	0.813388	-0.704716	0.473244	0.26759	0.319955	-0.655234	0.437428	-0.224296	-0.155957	0	-40215.6	-23255.4	3.47305	-13.3053
77	342	Nillson_TopS	342	343	NA	0.531324	0.285618	-0.583576	-0.0430541	0.890932	-0.396208	0.193273	0.57165	-0.478347	-0.0189661	0.296584	-0.740718	-0.236734	0	-29924.4	-22618.3	7.51315	-16.4179
87	343	Nillson_TopS	343	344	NA	1.55679	-0.162743	-0.543227	0.162357	0.273148	-0.287189	0.0103428	0.693662	-0.601155	-0.794254	0.00517098	-0.450103	0.512963	0	-51917.1	-29292	-2.80321	-1.98428
100	344	Nillson_TopS	344	345	NA	-0.909283	-0.716738	0.67655	-0.582794	-1.46387	1.02929	-0.874826	0.207014	-0.678702	1.97805	2.72755	0.645832	-0.400129	0	32801.1	-14640.6	-0.457409	31.025
93	345	Nillson_TopS	345	346	NA	-1.42834	-0.652037	0.983915	0.260983	-0.924474	0.351296	0.422381	2.10639	0.306223	0.415732	-0.922716	0.575577	-0.44232	0	-4939.76	31017	-4.40299	4.80104
87	346	Nillson_TopS	346	347	NA	1.66406	-0.351922	-0.671066	0.0550226	0.0391222	-0.271593	0.199754	0.267401	-0.258161	-0.739791	-0.124292	-0.141794	0.685008	0	-53286.8	-29261.6	-2.80321	-1.98428
101	347	Nillson_TopS	347	348	NA	0.852329	0.411349	-0.3542	-0.0758139	0.728998	-0.641248	0.35184	0.258101	0.0485203	-0.994741	-0.0194163	-0.420027	0.136974	0	NA	NA	1.66122	-10.7159
90	348	Nillson_TopS	348	349	NA	1.27598	-0.2108	-0.346681	0.0110048	0.227453	-0.188037	-0.239211	0.310362	-0.325883	-0.449256	0.628818	-0.610815	0.157118	0	NA	NA	0.04133	-8.05116
81	349	Nillson_TopS	349	350	NA	0.604439	0.749879	-0.505159	-0.356013	1.1032	-0.772297	0.456968	0.539646	0.0800975	-0.776008	-0.326038	-0.417576	-0.000388893	0	-42197.7	-22298.1	3.47305	-13.3053
78	350	Nillson_TopS	350	351	NA	1.45995	-0.0570707	-0.733972	-0.111408	0.431884	-0.247652	0.133734	0.134186	-0.127953	-0.849208	0.0309241	-0.209204	0.478033	0	-52497.8	-27374.6	-1.47521	-5.09834
90	351	Nillson_TopS	351	352	NA	0.801806	0.243199	-0.755855	0.0580461	0.753592	-0.499261	0.200627	0.362134	-0.119469	-0.492182	0.434211	-0.527732	-0.163469	0	-43991.9	-24988.3	0.04133	-8.05116
93	352	Nillson_TopS	352	353	NA	-1.36211	-0.526916	0.632313	0.645385	-0.828416	-0.295336	0.798637	2.0201	0.94452	0.107595	-1.37407	0.682216	-0.298104	0	-3876.78	31646.4	-4.40299	4.80104
81	353	Nillson_TopS	353	354	NA	0.750998	0.741257	-0.536043	-0.273964	1.30691	-0.530265	0.391836	0.179636	-0.0651957	-0.727527	0.0547384	-0.694991	-0.211874	0	NA	NA	3.47305	-13.3053
90	354	Nillson_TopS	354	355	NA	1.15886	0.212248	-0.237252	-0.260027	0.694231	-0.513366	0.196343	0.227086	-0.0506907	-0.717665	-0.213369	-0.447429	0.187593	0	NA	NA	0.04133	-8.05116
90	355	Nillson_TopS	355	356	NA	1.0771	0.0921683	-0.479633	0.03683	0.544022	-0.501846	0.32719	-0.240186	0.0474255	-0.787031	0.0688955	-0.142398	0.193398	0	NA	NA	0.04133	-8.05116
100	356	Nillson_TopS	356	357	NA	-1.08617	-0.943922	0.800895	-0.765729	-1.7397	1.25222	-1.20968	1.04478	-0.723776	1.92047	3.10221	0.703057	-0.168199	0	30023.4	-14163.4	-0.457409	31.025
81	357	Nillson_TopS	357	358	NA	0.56723	0.40161	-0.368811	0.114654	0.904469	-0.63998	0.164614	0.603758	-0.172366	-0.547115	0.38141	-0.786243	-0.318337	0	NA	NA	3.47305	-13.3053
96	358	Nillson_TopS	358	359	NA	-0.29671	0.543057	-0.609269	-0.615485	0.913531	-0.582334	0.818556	0.382113	0.326356	-0.400885	0.235511	0.29625	-0.634878	0	-35291.5	-20175.2	5.64891	-15.0421
101	359	Nillson_TopS	359	360	NA	0.821201	0.0860322	-0.653793	-0.186224	0.767758	-0.454248	0.438392	0.704696	-0.303272	-0.426836	-0.053614	-0.431877	-0.0328864	0	NA	NA	1.66122	-10.7159
81	360	Nillson_TopS	360	361	NA	0.751365	0.293612	-0.687757	-0.360785	0.723868	-0.492562	0.207535	0.822248	0.0690499	-0.631197	0.224448	-0.522257	-0.0678046	0	NA	NA	3.47305	-13.3053
80	361	Nillson_TopS	361	362	NA	-1.221	-0.724232	0.40549	-0.0122261	-0.829932	0.355877	0.839116	0.215829	0.802113	0.86132	-1.19785	1.12571	0.243401	0	1631.89	37258.1	-4.13488	11.909
90	362	Nillson_TopS	362	363	NA	1.7666	0.386159	-0.619664	0.51495	0.844653	-0.221835	0.221889	-0.126335	-0.231441	-1.07046	-0.769486	-0.839949	0.755318	0	-51730.5	-25005.8	0.04133	-8.05116
71	363	Nillson_TopS	363	364	NA	-1.3688	-0.19221	3.63896	-0.186516	-0.309466	-0.751347	-0.109372	-0.746213	1.59671	-0.763295	-0.709715	0.778135	0.462643	0	14705.3	11231.2	-7.2091	4.52457
81	364	Nillson_TopS	364	365	NA	0.373973	0.649586	-0.515176	-0.374297	1.11162	-0.694129	0.549596	0.006143	0.132822	-0.577534	0.415025	-0.31105	-0.435983	0	-38707	-22145.8	3.47305	-13.3053
78	365	Nillson_TopS	365	366	NA	1.58184	0.0103779	-0.710024	0.232227	0.362703	-0.127445	0.0490507	-0.0273589	-0.160556	-0.978362	-0.0166037	-0.423737	0.57345	0	-53595.6	-27702.9	-1.47521	-5.09834
71	366	Nillson_TopS	366	367	NA	-1.01554	-0.394839	3.27439	-0.228035	-0.185983	-0.566769	-0.247418	-0.262151	1.22802	-0.589626	-0.509815	0.36099	0.10058	0	NA	NA	-7.2091	4.52457
90	367	Nillson_TopS	367	368	NA	0.967977	0.293587	-0.302089	-0.213075	0.856547	-0.541682	0.208113	0.489079	-0.159717	-0.768158	0.0821534	-0.503948	-0.129219	0	NA	NA	0.04133	-8.05116
71	368	Nillson_TopS	368	369	NA	-1.14602	-0.267261	2.61028	-0.178843	-0.522682	-0.539446	0.105568	0.210394	1.50475	-0.421551	-0.745027	0.254212	0.157488	0	13605.1	13677	-7.2091	4.52457
87	369	Nillson_TopS	369	370	NA	1.82604	-0.369665	-0.755056	0.0397689	-0.0479719	-0.120215	-0.134705	0.711748	-0.376308	-0.659241	0.175609	-0.546821	0.723807	0	-51680.7	-29925.1	-2.80321	-1.98428
102	370	Nillson_TopS	370	371	NA	-0.839248	-0.348378	1.40097	0.0487397	-1.14061	1.01983	-0.830158	0.294791	-0.19062	1.66854	-0.979259	0.65576	0.233651	0	NA	NA	-5.64805	12.479
71	371	Nillson_TopS	371	372	NA	-1.16259	-0.37479	2.708	-0.345553	-0.438375	-0.257351	-0.138418	0.254237	1.20326	-0.204745	-0.938215	0.43605	0.202015	0	13667.3	13806	-7.2091	4.52457
89	372	Nillson_TopS	372	373	NA	-1.12721	0.685874	-0.234676	0.500291	1.0279	0.31202	0.237	-1.63071	-0.451101	0.97881	1.39029	0.0127731	-0.886316	0	-1760.93	-24310.1	11.2514	-19.9456
104	373	Nillson_TopS	373	374	NA	-0.410056	-0.175463	0.790503	-0.695748	-1.46434	1.94372	-1.55543	-1.56766	-0.881883	1.90241	3.33672	0.68294	0.460007	0	48414.8	-17932.3	-1.20331	25.4698
81	374	Nillson_TopS	374	375	NA	0.552686	0.542481	-0.565593	-0.392461	1.15231	-0.58135	0.595443	0.152403	0.0793165	-0.565529	-0.15716	-0.265191	-0.232715	0	NA	NA	3.47305	-13.3053
78	375	Nillson_TopS	375	376	NA	1.64738	0.0262749	-0.935372	0.230074	0.449642	-0.0988837	0.156651	0.478948	-0.019801	-1.21661	-0.474257	-0.402805	0.711788	0	-53362	-26583.9	-1.47521	-5.09834
96	376	Nillson_TopS	376	377	NA	0.373817	0.578351	-0.562067	-0.470719	1.21035	-0.51288	0.518814	0.282478	-0.0477584	-0.617947	0.169095	-0.242723	-0.351456	0	NA	NA	5.64891	-15.0421
96	377	Nillson_TopS	377	378	NA	-0.0349864	1.0304	-0.571672	-0.368548	1.50274	-0.731303	0.744423	0.203884	0.402046	-0.553014	-0.239121	-0.342629	-0.572769	0	NA	NA	5.64891	-15.0421
90	378	Nillson_TopS	378	379	NA	1.37398	0.0175658	-0.696738	0.12914	0.466833	-0.265734	0.0639746	0.416105	-0.376924	-0.8401	0.160559	-0.421606	0.303205	0	-51057.8	-27901.2	0.04133	-8.05116
87	379	Nillson_TopS	379	380	NA	1.64691	-0.250916	-0.262097	0.0285229	0.285995	-0.154846	0.00738124	0.21277	-0.40528	-0.915586	0.0410708	-0.457451	0.564361	0	NA	NA	-2.80321	-1.98428
81	380	Nillson_TopS	380	381	NA	0.560482	0.459673	-0.75005	-0.180486	0.997716	-0.700802	0.487105	0.379573	0.146385	-0.598832	-0.120736	-0.248342	-0.11184	0	-42486.4	-22716.7	3.47305	-13.3053
90	381	Nillson_TopS	381	382	NA	1.27568	0.470184	-0.753009	0.328146	0.845247	-0.572874	0.284216	0.277628	-0.093852	-1.09364	-0.240822	-0.501718	0.231345	0	NA	NA	0.04133	-8.05116
99	382	Nillson_TopS	382	383	NA	-1.35313	0.703011	0.290416	-0.363512	-0.437112	-0.13269	0.506534	1.84525	0.583902	0.14302	-1.09779	0.54041	-0.371477	0	-2805.85	25903.9	-2.99233	5.10986
90	383	Nillson_TopS	383	384	NA	1.57893	0.330392	-0.788867	-0.0369207	0.818337	-0.284392	0.277991	0.419908	-0.267484	-0.835028	-0.345912	-0.763876	0.396814	0	NA	NA	0.04133	-8.05116
80	384	Nillson_TopS	384	385	NA	-0.946664	-0.691054	0.3284	0.156264	-0.927464	0.602025	0.449609	-0.350633	0.526799	1.16374	-0.957613	0.945323	0.422471	0	5214.63	38803.3	-4.13488	11.909
87	385	Nillson_TopS	385	386	NA	1.86612	-0.192105	-0.41711	0.229657	0.281581	-0.17805	-0.00980725	0.172255	-0.24501	-0.864491	-0.386921	-0.546036	0.722169	0	NA	NA	-2.80321	-1.98428
87	386	Nillson_TopS	386	387	NA	1.62806	-0.46806	-0.706358	-0.096652	-0.112736	-0.206842	0.171054	0.698059	-0.116767	-0.743352	-0.0635925	-0.154004	0.546393	0	-52462.6	-29589	-2.80321	-1.98428
87	387	Nillson_TopS	387	388	NA	1.58275	-0.0750528	-0.585476	0.431439	0.418951	-0.266066	-0.0951038	0.179367	-0.384711	-0.892592	0.0617024	-0.515389	0.496799	0	-52303.2	-28828	-2.80321	-1.98428
90	388	Nillson_TopS	388	389	NA	0.603311	-0.0170274	-0.34972	-0.415122	0.192417	-0.400153	0.155346	0.970711	-0.42577	-0.294577	0.599928	-0.253451	-0.15992	0	NA	NA	0.04133	-8.05116
71	389	Nillson_TopS	389	390	NA	-1.36467	-0.229256	3.2307	-0.318472	-0.200425	-0.620074	-0.115453	-0.0976191	1.45969	-0.440866	-0.448737	0.300485	-0.135489	0	NA	NA	-7.2091	4.52457
89	390	Nillson_TopS	390	391	NA	-1.16824	0.42492	0.375486	1.19049	1.00858	0.238473	0.176915	-1.71006	-0.354	0.777164	1.09198	-0.0764507	-1.06491	0	-2294.93	-21543.6	11.2514	-19.9456
93	391	Nillson_TopS	391	392	NA	-1.52846	-0.78819	1.10328	2.24348	-0.575201	-0.241166	0.37672	1.55922	0.148489	0.297261	-1.26091	0.466007	-0.306236	0	-2320.88	33294.1	-4.40299	4.80104
68	392	Nillson_TopS	392	393	NA	-0.822186	0.0346031	1.72483	0.340881	-0.651546	0.0587129	-0.767659	1.81397	-0.00801923	0.0931219	-0.355132	0.106671	-0.619667	0	7102.86	22491.5	-7.16747	12.5824
102	393	Nillson_TopS	393	394	NA	-0.758848	-0.16264	1.71308	0.306519	-1.20011	0.864518	-1.07931	0.410098	-0.191956	1.60147	-1.06176	0.627709	0.120093	0	27645.7	15668.9	-5.64805	12.479
90	394	Nillson_TopS	394	395	NA	1.62518	-0.278407	0.174059	0.718598	0.0624227	-0.376469	-0.375054	0.899148	-0.944684	-0.751426	0.213573	-0.956744	0.576961	0	NA	NA	0.04133	-8.05116
89	395	Nillson_TopS	395	396	NA	-0.619348	0.379581	-0.243624	0.720177	0.766634	0.297941	-0.0190481	-1.25605	-0.535762	0.851903	0.944756	-0.0441251	-0.749567	0	-1938.11	-22944	11.2514	-19.9456
87	396	Nillson_TopS	396	397	NA	1.73199	-0.0494507	-0.653688	0.103615	0.294105	-0.357725	-0.145371	0.70044	-0.488663	-0.87018	0.0711316	-0.528092	0.617883	0	NA	NA	-2.80321	-1.98428
90	397	Nillson_TopS	397	398	NA	1.20212	0.259507	-0.356342	0.019694	0.879254	-0.527346	0.239708	0.466336	-0.0948062	-0.879439	-0.659329	-0.393614	0.190112	0	-47958.5	-24059.5	0.04133	-8.05116
90	398	Nillson_TopS	398	399	NA	1.6208	-0.0551862	-0.165412	0.766037	0.339046	-0.439425	-0.0460869	0.482777	-0.280445	-1.05814	-0.718899	-0.526535	0.549868	0	NA	NA	0.04133	-8.05116
95	399	Nillson_TopS	399	400	NA	-0.847496	-0.00585239	1.31372	-0.437065	-0.203868	-0.0775316	-0.2478	0.615397	1.42662	0.370648	-1.09327	0.0988578	-0.285836	0	13099.4	17899.7	-5.89098	4.66014
101	400	Nillson_TopS	400	401	NA	0.918397	0.30367	-0.599861	0.0363866	0.889909	-0.529316	0.272603	0.60102	-0.240907	-0.662669	-0.0957924	-0.547208	-0.0480358	0	-45903.3	-24634.2	1.66122	-10.7159
87	401	Nillson_TopS	401	402	NA	1.1761	-0.373597	-0.575853	-0.317745	0.138035	-0.28952	0.210158	0.634315	-0.0659781	-0.623436	-0.114257	0.0744479	0.375796	0	NA	NA	-2.80321	-1.98428
90	402	Nillson_TopS	402	403	NA	1.76103	-0.284811	-0.0855744	0.753875	0.183994	-0.25864	-0.0267568	0.320646	-0.525139	-1.01489	-0.298052	-0.852496	0.845769	0	NA	NA	0.04133	-8.05116
87	403	Nillson_TopS	403	404	NA	1.93934	-0.481015	-0.593191	0.0900857	-0.142958	-0.122493	-0.251427	0.929302	-0.722611	-0.694195	0.22148	-0.452736	0.813014	0	NA	NA	-2.80321	-1.98428
87	404	Nillson_TopS	404	405	NA	1.86482	-0.626065	-0.402365	0.510113	-0.272904	-0.188256	-0.141275	0.517591	-0.335239	-0.961193	0.0158108	-0.307388	0.799749	0	NA	NA	-2.80321	-1.98428
90	405	Nillson_TopS	405	406	NA	1.378	0.448543	-0.601484	0.021195	0.883087	-0.533345	0.342687	0.814921	-0.123986	-1.01028	-0.866124	-0.577242	0.377967	0	NA	NA	0.04133	-8.05116
101	406	Nillson_TopS	406	407	NA	1.05395	0.520698	-0.573404	0.0318339	0.943883	-0.543226	0.205308	0.127048	-0.0405552	-0.86493	-0.0166824	-0.447381	-0.0715699	0	NA	NA	1.66122	-10.7159
81	407	Nillson_TopS	407	408	NA	0.290311	0.956564	-0.363643	-0.220824	1.43299	-0.891085	0.568511	0.541476	0.0608786	-0.674194	-0.109273	-0.612086	-0.511549	0	-38087.1	-21163.5	3.47305	-13.3053
81	408	Nillson_TopS	408	409	NA	0.484936	0.92993	-0.920248	-0.349	1.31487	-0.59016	0.641037	0.109783	0.318825	-0.713046	-0.314498	-0.288607	-0.147045	0	NA	NA	3.47305	-13.3053
90	409	Nillson_TopS	409	410	NA	0.878346	-0.100603	-0.394933	0.0494995	0.520548	-0.3466	-0.00490976	0.826172	-0.294415	-0.526208	0.194459	-0.472421	-0.112858	0	NA	NA	0.04133	-8.05116
95	410	Nillson_TopS	410	411	NA	-0.683494	-0.175216	1.01291	-0.322255	-0.363879	0.200193	-0.448977	1.18613	1.04366	0.610903	-1.0573	-0.0318719	-0.355057	0	12835.1	18721.3	-5.89098	4.66014
84	411	Nillson_TopS	411	412	NA	-1.00074	-0.331942	0.903848	0.200444	-0.828032	0.506358	0.523331	-0.719164	0.586425	1.11807	-1.20275	0.93512	0.153286	0	6679.3	38299.6	-3.02112	14.8073
68	412	Nillson_TopS	412	413	NA	-0.827306	0.380882	1.10397	0.649067	-0.459877	-0.0309954	-0.558928	0.166409	0.152012	0.223598	-0.323711	-0.0804697	0.0644119	0	NA	NA	-7.16747	12.5824
101	413	Nillson_TopS	413	414	NA	0.850839	0.501113	-0.556382	-0.235832	0.923246	-0.710355	0.533957	0.190683	0.0547073	-0.728764	-0.218731	-0.279808	0.00601623	0	NA	NA	1.66122	-10.7159
87	414	Nillson_TopS	414	415	NA	1.95808	-0.257326	-0.668921	0.545629	0.188191	-0.0564953	-0.120835	0.512937	-0.441418	-0.908496	-0.375384	-0.717475	0.900181	0	-53309.8	-29813.2	-2.80321	-1.98428
90	415	Nillson_TopS	415	416	NA	1.09599	0.071328	-0.491023	-0.135409	0.797198	-0.501898	0.287766	0.191598	0.0256461	-0.845192	-0.0318064	-0.50239	0.336926	0	-48647.4	-25304.8	0.04133	-8.05116
94	416	Nillson_TopS	416	417	NA	-1.05837	0.479748	0.317699	-0.633607	0.850331	0.453907	0.088249	-2.23018	-0.0552781	0.999254	2.73105	0.171889	-0.69617	0	4483.08	-23776.8	11.5245	-18.2658
90	417	Nillson_TopS	417	418	NA	1.03362	0.314607	-0.312777	-0.134789	0.693534	-0.371363	-0.0130607	0.636623	-0.578358	-0.637332	0.3232	-0.724517	0.0782206	0	NA	NA	0.04133	-8.05116
90	418	Nillson_TopS	418	419	NA	1.53335	-0.19849	-0.388324	0.487161	0.133638	-0.302881	-0.0708537	1.00185	-0.205376	-0.972947	0.107628	-0.870278	0.24986	0	-50995.7	-29057.4	0.04133	-8.05116
101	419	Nillson_TopS	419	420	NA	0.952831	0.270213	-0.592213	-0.411884	0.769935	-0.638383	0.347705	-0.0133348	0.0856937	-0.667571	0.102807	-0.12179	0.18566	0	-45063.2	-24385	1.66122	-10.7159
71	420	Nillson_TopS	420	421	NA	-1.30991	-0.217896	3.09405	-0.18533	-0.353352	-0.770415	-0.0300922	0.102256	1.49598	-0.800158	-0.503913	0.44211	0.232975	0	13689.9	12297.2	-7.2091	4.52457
101	421	Nillson_TopS	421	422	NA	0.808358	0.741483	-0.900456	-0.278019	1.22185	-0.506991	0.496144	0.454002	0.000503432	-0.716869	-0.0467444	-0.659115	-0.125997	0	-42488.2	-23134.2	1.66122	-10.7159
90	422	Nillson_TopS	422	423	NA	1.16775	0.045869	-0.660151	-0.246497	0.566508	-0.32511	0.048065	0.569048	-0.369655	-0.611182	0.357193	-0.437277	0.194272	0	NA	NA	0.04133	-8.05116
90	423	Nillson_TopS	423	424	NA	0.802378	0.145599	-0.604616	-0.348557	0.664866	-0.338506	0.104625	0.164448	-0.148919	-0.435596	0.730413	-0.360556	-0.144883	0	NA	NA	0.04133	-8.05116
74	424	Nillson_TopS	424	425	NA	-0.911836	0.419861	-0.271352	-0.0168014	1.06268	0.488984	0.191747	-1.52088	-0.656098	1.20387	1.1311	0.201504	-0.593643	0	-504.131	-25204.3	10.1585	-18.3044
90	425	Nillson_TopS	425	426	NA	1.74568	-0.243914	-0.412589	0.0624562	0.519661	-0.28824	0.116068	0.792159	-0.409836	-0.840325	-0.523591	-0.653475	0.607592	0	NA	NA	0.04133	-8.05116
80	426	Nillson_TopS	426	427	NA	-1.14736	-0.50642	0.0871152	0.740229	-0.979551	0.633161	0.183786	0.312331	0.338414	0.937611	-0.440934	0.593366	-0.192083	0	-589.276	35602.1	-4.13488	11.909
90	427	Nillson_TopS	427	428	NA	0.990878	0.0336971	-0.52848	0.699641	0.500479	-0.547152	0.179517	0.49111	-0.0241387	-0.867614	-0.248021	-0.387508	0.024632	0	NA	NA	0.04133	-8.05116
90	428	Nillson_TopS	428	429	NA	1.37178	0.0240735	-0.594029	-0.183175	0.640114	-0.386873	0.0853567	0.904296	-0.431825	-0.836689	0.119635	-0.585986	0.272791	0	NA	NA	0.04133	-8.05116
90	429	Nillson_TopS	429	430	NA	0.841949	0.227305	-0.712843	-0.235763	0.622818	-0.210709	0.21085	1.22547	-0.313619	-0.43669	-0.0114834	-0.733788	-0.0978186	0	NA	NA	0.04133	-8.05116
87	430	Nillson_TopS	430	431	NA	0.959792	0.0403809	-0.56905	0.339744	0.496784	-0.570565	0.064303	0.904806	-0.2106	-0.816033	0.00783345	-0.402781	0.0461375	0	NA	NA	-2.80321	-1.98428
90	431	Nillson_TopS	431	432	NA	0.890817	-0.352853	-0.79448	-0.322842	0.284148	-0.442153	0.651394	0.564837	0.111421	-0.468862	-0.223795	0.390862	0.0294677	0	NA	NA	0.04133	-8.05116
68	432	Nillson_TopS	432	433	NA	-0.877773	0.315364	1.80675	0.599723	-0.933715	0.342772	-1.06658	0.181909	-0.37713	1.21086	-0.440014	0.503345	-0.202228	0	NA	NA	-7.16747	12.5824
74	433	Nillson_TopS	433	434	NA	-0.724025	0.587897	-0.539756	0.159214	1.02672	-0.0113868	0.158069	-0.368157	-0.556883	0.571414	1.41418	-0.337422	-0.925769	0	-6506.06	-22657.2	10.1585	-18.3044
90	434	Nillson_TopS	434	435	NA	1.41318	-0.000155257	-0.850598	-0.161649	0.54485	-0.427362	0.142095	-0.0585709	-0.208431	-0.786139	0.687364	-0.3259	0.427382	0	-50405	-27376.9	0.04133	-8.05116
97	435	Nillson_TopS	435	436	NA	-0.827394	0.295564	-0.0401081	-0.687389	-1.12947	1.37579	-1.25255	-0.575821	-0.647778	2.19963	1.64963	0.81379	0.10671	0	41275.1	-14679.8	-0.640634	29.6106
87	436	Nillson_TopS	436	437	NA	1.79416	-0.57423	-0.325453	0.455437	-0.250663	-0.272289	-0.0519612	0.307311	-0.0863691	-0.886278	-0.181193	-0.400806	0.908241	0	NA	NA	-2.80321	-1.98428
81	437	Nillson_TopS	437	438	NA	0.718634	0.410913	-0.853359	-0.368439	0.973889	-0.424614	0.476096	0.183987	-0.000796291	-0.593208	0.289306	-0.424568	-0.0536186	0	NA	NA	3.47305	-13.3053
77	438	Nillson_TopS	438	439	NA	-0.296861	0.647356	-0.377471	0.462634	1.00995	-0.288445	0.124235	0.00165923	-0.429938	0.154112	0.658126	-0.468436	-0.908757	0	-15907	-21827.1	7.51315	-16.4179
101	439	Nillson_TopS	439	440	NA	1.24597	0.40478	-0.468083	0.00184607	1.09218	-0.473874	0.40845	0.297477	-0.154809	-1.09708	-0.345554	-0.592745	0.116439	0	NA	NA	1.66122	-10.7159
87	440	Nillson_TopS	440	441	NA	1.89863	-0.233556	-0.296014	0.976449	-0.0363828	-0.118952	-0.091501	0.151217	-0.375624	-1.18707	-0.621829	-0.386251	0.899775	0	NA	NA	-2.80321	-1.98428
83	441	Nillson_TopS	441	442	NA	-0.66342	-0.661694	0.606061	-0.554182	-1.29799	1.78355	-1.07842	-1.66972	-0.537039	2.58803	2.13463	1.24808	0.132707	0	43978.4	-13979.2	-0.90395	27.6653
101	442	Nillson_TopS	442	443	NA	0.761167	0.530788	-0.63804	-0.370236	0.964411	-0.542085	0.315313	0.259816	-0.19378	-0.483254	0.508628	-0.53442	-0.253495	0	NA	NA	1.66122	-10.7159
101	443	Nillson_TopS	443	444	NA	0.942975	0.588232	-0.517807	0.103726	0.979259	-0.557891	0.345664	0.586836	-0.167972	-0.857152	-0.386294	-0.655292	-0.0267403	0	-45850.6	-23247.1	1.66122	-10.7159
90	444	Nillson_TopS	444	445	NA	0.937083	-0.0420536	-0.34059	-0.330662	0.576879	-0.488223	0.253294	0.679324	0.124244	-0.617941	-0.530628	-0.101754	0.116806	0	NA	NA	0.04133	-8.05116
90	445	Nillson_TopS	445	446	NA	1.13878	0.04195	-0.757401	-0.199942	0.549066	-0.396199	0.15119	0.433164	-0.265272	-0.623739	0.139315	-0.263618	0.335435	0	NA	NA	0.04133	-8.05116
90	446	Nillson_TopS	446	447	NA	1.24154	0.147078	-0.627632	-0.00077919	0.667603	-0.33061	0.251857	0.577925	-0.253107	-0.654697	-0.477559	-0.467695	0.240506	0	NA	NA	0.04133	-8.05116
90	447	Nillson_TopS	447	448	NA	1.08883	-0.142574	-0.48676	-0.0854809	0.155266	-0.522103	0.346006	0.234437	0.0291394	-0.649852	0.235172	-0.074937	0.0796379	0	NA	NA	0.04133	-8.05116
102	448	Nillson_TopS	448	449	NA	-0.423084	-0.803736	1.38038	-0.308128	-1.4066	1.38297	-1.03116	-0.0959696	-0.236862	1.81258	-1.08956	0.788967	1.38187	0	26255.3	14047.1	-5.64805	12.479
81	449	Nillson_TopS	449	450	NA	0.661934	0.403679	-0.462375	-0.499206	1.01963	-0.577937	0.551986	0.533649	-0.0853554	-0.592563	-0.236757	-0.317634	-0.0900706	0	NA	NA	3.47305	-13.3053
79	450	Nillson_TopS	450	451	NA	0.301383	0.565932	0.114285	-0.587585	-0.987878	2.80809	-1.08581	-1.99834	-0.548812	2.80091	-1.37197	1.48115	0.968242	0	62499.9	-9780.05	-2.18619	19.1368
102	451	Nillson_TopS	451	452	NA	-0.875561	-0.40561	1.13759	0.36648	-1.10804	0.933128	-0.994721	-0.488902	0.275087	1.60105	-0.283513	0.540084	0.117857	0	27976.8	13009.7	-5.64805	12.479
90	452	Nillson_TopS	452	453	NA	1.2266	0.0787343	-0.740883	0.587622	0.693887	-0.522322	0.22506	0.41229	-0.177929	-0.8489	-0.205177	-0.491077	0.154027	0	NA	NA	0.04133	-8.05116
74	453	Nillson_TopS	453	454	NA	-0.994232	0.681961	-0.156906	-0.322145	1.30959	0.323721	0.505987	-1.91309	-0.156937	1.01492	1.65483	0.00500979	-0.828268	0	414.184	-25821.7	10.1585	-18.3044
90	454	Nillson_TopS	454	455	NA	1.28918	0.455012	-0.994786	-0.0400115	1.02913	-0.293814	0.367719	0.221199	-0.00176491	-0.878283	-0.553355	-0.383134	0.26141	0	NA	NA	0.04133	-8.05116
90	455	Nillson_TopS	455	456	NA	0.394339	0.224172	-0.639373	-0.277069	0.429303	-0.589406	0.197074	1.30672	-0.0067042	-0.373853	0.926075	-0.583744	-0.595035	0	NA	NA	0.04133	-8.05116
101	456	Nillson_TopS	456	457	NA	0.851106	0.469522	-0.430031	-0.283042	0.965826	-0.620717	0.366852	0.146032	-0.0502314	-0.622285	-0.206337	-0.39118	0.0813412	0	NA	NA	1.66122	-10.7159
96	457	Nillson_TopS	457	458	NA	0.443867	0.586859	-0.692708	-0.471017	1.06535	-0.609086	0.617429	0.446855	0.201677	-0.909437	0.298102	-0.229414	-0.349266	0	-39617.3	-22848.4	5.64891	-15.0421
97	458	Nillson_TopS	458	459	NA	-0.975328	-0.899628	0.674326	-0.492193	-1.09461	1.03516	-0.779408	-0.552251	-0.318488	1.74146	2.12469	0.858804	-0.171618	0	38055.8	-14823.2	-0.640634	29.6106
86	459	Nillson_TopS	459	460	NA	-1.094	-0.517037	0.100071	0.481288	-0.706383	0.252686	0.529221	0.570863	0.376823	0.807431	-1.00052	0.63487	0.198768	0	NA	NA	-4.2936	8.20126
81	460	Nillson_TopS	460	461	NA	0.677369	0.598331	-0.630146	-0.309569	1.12234	-0.652733	0.472728	0.430306	0.13406	-0.494031	-0.0907318	-0.457678	-0.437886	0	NA	NA	3.47305	-13.3053
95	461	Nillson_TopS	461	462	NA	-1.19423	-0.281048	1.96851	-0.207613	-0.283401	-0.144634	-0.19756	0.681473	1.39462	0.184581	-0.966026	0.064637	-0.179438	0	13110.7	16774.2	-5.89098	4.66014
78	462	Nillson_TopS	462	463	NA	1.46311	0.00973138	-0.594574	0.0137179	0.349085	-0.259096	0.0437732	0.539864	-0.0635592	-0.981198	-0.194779	-0.388885	0.410397	0	-51891	-27489.3	-1.47521	-5.09834
80	463	Nillson_TopS	463	464	NA	-1.15627	-0.471412	0.665379	0.942003	-0.9449	0.128906	0.668351	-0.365537	0.873558	0.575914	-1.1587	0.837127	0.288517	0	3312.09	36799.7	-4.13488	11.909
90	464	Nillson_TopS	464	465	NA	1.38999	-0.0131891	-0.55759	0.503822	0.395201	-0.274098	-0.0121788	0.704989	-0.407196	-0.983393	-0.124585	-0.652117	0.422594	0	NA	NA	0.04133	-8.05116
87	465	Nillson_TopS	465	466	NA	1.29937	-0.185416	-0.323748	-0.289245	0.29534	-0.304978	0.14509	0.565885	-0.209095	-0.925825	-0.0745473	-0.185558	0.473757	0	-51064.7	-27929.8	-2.80321	-1.98428
87	466	Nillson_TopS	466	467	NA	2.08081	-0.555346	-0.576715	0.499481	-0.124876	0.045224	-0.0224744	0.0429487	-0.242069	-0.857098	-0.48886	-0.190914	0.917548	0	NA	NA	-2.80321	-1.98428
103	467	Nillson_TopS	467	468	NA	-0.1572	-0.006362	0.259524	-0.467817	-0.87418	2.19669	-0.761225	-1.99451	-0.262735	2.26841	-0.252384	1.07215	0.523269	0	59889.3	-10902.7	-1.77317	21.6487
94	468	Nillson_TopS	468	469	NA	-0.936806	0.855175	-0.320528	-0.65367	1.39194	0.456241	0.478065	-1.99175	-0.0134035	1.16431	1.16724	0.171407	-0.667688	0	NA	NA	11.5245	-18.2658
94	469	Nillson_TopS	469	470	NA	-1.18578	-0.0262002	-0.145819	0.466394	0.387905	0.495374	-0.185195	-1.30771	-0.619189	1.14739	2.54619	0.118431	-0.737091	0	1327.75	-22342.3	11.5245	-18.2658
73	470	Nillson_TopS	470	471	NA	-0.387102	-0.956508	1.48533	2.92124	-0.908067	-0.336864	-0.670645	1.22996	-0.631162	0.0689334	0.55937	-0.574465	-0.524021	0	-3100.74	16422.5	-4.75949	1.27338
87	471	Nillson_TopS	471	472	NA	1.94056	-0.301131	-0.539377	0.461104	0.0477124	-0.231799	-0.146201	0.34101	-0.315651	-0.907784	0.037174	-0.621204	0.699133	0	NA	NA	-2.80321	-1.98428
81	472	Nillson_TopS	472	473	NA	0.268554	0.467932	-0.577364	-0.167966	1.15605	-0.801725	0.57059	0.900133	0.26315	-0.549893	-0.146445	-0.320917	-0.651302	0	NA	NA	3.47305	-13.3053
101	473	Nillson_TopS	473	474	NA	0.898801	0.530343	-0.709623	0.118746	1.09535	-0.431809	0.614085	0.253435	0.126112	-0.872269	-0.961434	-0.324117	0.12863	0	-46321.7	-22591.1	1.66122	-10.7159
72	474	Nillson_TopS	474	475	NA	0.231877	-0.345053	-0.177242	0.676141	0.0713153	0.160381	-0.52019	0.447493	-0.911706	0.467216	1.01168	-0.422485	-0.40011	0	-6832.14	-15993.2	8.83648	-17.3626
104	475	Nillson_TopS	475	476	NA	-0.472926	-0.124351	0.10427	-0.839053	-1.36067	1.96613	-1.24845	-1.34899	-0.0498482	1.70646	2.51686	0.473401	0.320732	0	51319.3	-17423.4	-1.20331	25.4698
79	476	Nillson_TopS	476	477	NA	0.0322767	0.378865	0.126605	-0.335057	-0.894414	2.5191	-1.38119	-0.779217	-0.702427	2.52389	-1.4585	1.06744	0.804512	0	60364.3	-9110.36	-2.18619	19.1368
81	477	Nillson_TopS	477	478	NA	0.592255	0.866913	-0.671997	-0.362038	1.39789	-0.759595	0.52872	0.442346	-0.0250632	-0.815052	0.367438	-0.770349	-0.268069	0	NA	NA	3.47305	-13.3053
76	478	Nillson_TopS	478	479	NA	-1.70268	-0.872588	0.626478	1.06741	-0.963989	-0.0870231	0.355768	1.19319	0.271822	0.448292	0.791902	0.333099	-0.382642	0	NA	NA	-3.9653	1.78471
94	479	Nillson_TopS	479	480	NA	-0.40819	0.193406	-0.331322	-0.423464	0.558332	0.0775718	-0.126111	0.485586	-0.707402	0.626395	1.26356	-0.232665	-0.660924	0	-6775.93	-19753.9	11.5245	-18.2658
90	480	Nillson_TopS	480	481	NA	0.943888	0.0812164	-0.601089	-0.223362	0.590703	-0.592149	0.515699	0.447997	0.0210323	-0.817009	-0.00344705	-0.11227	0.0386308	0	NA	NA	0.04133	-8.05116
91	481	Nillson_TopS	481	482	NA	-0.42897	-0.545465	0.0474574	0.818895	-1.02185	-0.0728132	0.276099	-0.0731003	0.180067	0.342815	0.73909	0.338728	-0.235699	0	-6587.96	19271.5	-3.17219	1.32407
90	482	Nillson_TopS	482	483	NA	1.30507	-0.10324	-0.534941	-0.0543264	0.498321	-0.461199	0.0290108	0.894976	-0.393025	-0.773191	0.173603	-0.477544	0.24241	0	NA	NA	0.04133	-8.05116
90	483	Nillson_TopS	483	484	NA	1.27371	0.300519	-1.56278	0.44986	1.01173	-0.566404	0.672188	0.313306	0.0777955	-0.861115	-0.316946	-0.144482	0.393063	0	NA	NA	0.04133	-8.05116
90	484	Nillson_TopS	484	485	NA	1.10146	-0.14973	-0.343171	-0.0829427	0.320216	-0.381697	-0.0361206	0.159775	-0.0963907	-0.689115	0.508778	-0.361547	0.25004	0	NA	NA	0.04133	-8.05116
87	485	Nillson_TopS	485	486	NA	2.17008	-0.155672	-0.828978	0.339231	0.123664	0.0312133	-0.255285	0.24017	-0.722621	-0.75725	0.467109	-0.905154	0.929724	0	-50422.9	-30126.6	-2.80321	-1.98428
87	486	Nillson_TopS	486	487	NA	1.86052	-0.227013	-0.691084	0.115798	0.262769	-0.211068	0.0887534	0.137259	-0.228864	-0.988046	-0.177874	-0.305186	0.806102	0	NA	NA	-2.80321	-1.98428
90	487	Nillson_TopS	487	488	NA	1.41433	0.125083	-0.782618	0.127295	0.603437	-0.177309	0.0538941	0.308926	-0.471027	-0.835183	0.334362	-0.610352	0.307416	0	NA	NA	0.04133	-8.05116
90	488	Nillson_TopS	488	489	NA	1.55017	0.297963	-0.418712	0.252876	0.782441	-0.320371	0.141972	-0.0315883	-0.285349	-1.04987	-0.34498	-0.61673	0.439833	0	NA	NA	0.04133	-8.05116
90	489	Nillson_TopS	489	490	NA	1.08727	0.252562	-1.29425	0.0425472	0.875808	-0.41645	0.478447	0.232899	-0.0851805	-0.607388	0.12977	-0.319218	0.188872	0	NA	NA	0.04133	-8.05116
101	490	Nillson_TopS	490	491	NA	0.699697	0.608005	-0.679643	0.377742	0.898684	-0.671573	0.371561	0.284665	-0.215944	-0.909893	0.478994	-0.539508	-0.300725	0	NA	NA	1.66122	-10.7159
90	491	Nillson_TopS	491	492	NA	1.49329	-0.131918	-0.416572	0.530496	0.259713	-0.324429	-0.000121845	0.656625	-0.402083	-1.00035	-0.264808	-0.454673	0.437723	0	NA	NA	0.04133	-8.05116
90	492	Nillson_TopS	492	493	NA	1.02913	0.52105	-0.358785	0.305273	1.04327	-0.70058	0.397335	0.0653081	-0.0401452	-1.05998	-0.468239	-0.420669	0.0719093	0	NA	NA	0.04133	-8.05116
90	493	Nillson_TopS	493	494	NA	1.01795	-0.0836678	-0.661346	0.0703302	0.390299	-0.402926	0.311075	0.408473	0.0292225	-0.70982	-0.0109221	-0.234791	0.111974	0	NA	NA	0.04133	-8.05116
71	494	Nillson_TopS	494	495	NA	-1.05684	-0.33368	2.7558	-0.221822	-0.265619	-0.524768	-0.245611	0.14845	1.46332	-0.271704	-1.03338	0.517417	0.144122	0	13736	13954.1	-7.2091	4.52457
90	495	Nillson_TopS	495	496	NA	0.755226	0.448145	-0.316623	-0.397814	0.954465	-0.442297	0.171378	-0.110955	-0.21366	-0.376363	0.40682	-0.584721	-0.0609083	0	NA	NA	0.04133	-8.05116
101	496	Nillson_TopS	496	497	NA	0.999965	0.512033	-0.799617	0.00501174	0.944643	-0.563552	0.325436	0.0680117	-0.169534	-0.830664	0.128359	-0.362227	0.101523	0	-45572.9	-24487.8	1.66122	-10.7159
95	497	Nillson_TopS	497	498	NA	-0.906814	-0.191325	1.38081	-0.118965	-0.419192	-0.103317	-0.191971	1.6102	1.18736	0.384617	-1.06229	0.00751541	-0.769345	0	11590.2	18569	-5.89098	4.66014
74	498	Nillson_TopS	498	499	NA	-1.01788	0.414543	-0.460555	0.339988	1.02486	0.403584	0.153845	-1.36499	-0.409373	0.947348	1.4478	-0.0245942	-0.781472	0	-1093.47	-23901.2	10.1585	-18.3044
87	499	Nillson_TopS	499	500	NA	1.93688	-0.741326	-0.351345	0.226981	-0.0754945	-0.235501	-0.223869	0.840928	-0.283597	-0.610263	-0.44845	-0.381782	0.858589	0	NA	NA	-2.80321	-1.98428
94	500	Nillson_TopS	500	501	NA	-0.896932	1.43605	0.159507	-0.56682	1.85196	-0.0391878	0.831535	-2.55385	0.132311	0.54527	2.03322	-0.147357	-1.00006	0	NA	NA	11.5245	-18.2658
103	501	Nillson_TopS	501	502	NA	-0.637123	-0.0905559	0.638497	-0.564156	-1.09488	1.74834	-0.549616	-2.07287	0.0205832	1.89582	0.80408	1.05903	0.461275	0	53936.3	-12229.9	-1.77317	21.6487
71	502	Nillson_TopS	502	503	NA	-1.08804	-0.217681	3.31994	-0.225789	-0.486498	-0.688003	-0.231117	-0.365318	1.4209	-0.6434	-0.683237	0.679224	0.404214	0	14379.8	11576.4	-7.2091	4.52457
90	503	Nillson_TopS	503	504	NA	1.2994	0.417069	-0.922698	0.141284	0.842856	-0.483409	0.407347	0.28645	0.250839	-1.04216	-0.703178	-0.176973	0.178664	0	NA	NA	0.04133	-8.05116
90	504	Nillson_TopS	504	505	NA	1.31732	0.155329	-0.344341	0.160223	0.572289	-0.470436	0.153862	0.50446	-0.285647	-0.978391	-0.265994	-0.556208	0.364831	0	NA	NA	0.04133	-8.05116
81	505	Nillson_TopS	505	506	NA	0.989884	0.97581	-0.592174	-0.131452	1.55192	-0.689688	0.678504	-0.300331	0.136166	-0.883453	-0.552418	-0.56947	-0.0306803	0	NA	NA	3.47305	-13.3053
78	506	Nillson_TopS	506	507	NA	1.48052	-0.321003	-0.793916	0.0672844	0.135986	-0.47163	0.288346	0.190543	0.216371	-0.779619	-0.224937	0.0780737	0.475122	0	-52186.2	-27272.5	-1.47521	-5.09834
93	507	Nillson_TopS	507	508	NA	-1.20013	-0.573718	0.421641	0.487747	-0.853415	-0.120925	0.485984	1.81436	0.182482	0.584882	-0.759328	0.645087	-0.279784	0	-4969.91	32350.4	-4.40299	4.80104
90	508	Nillson_TopS	508	509	NA	1.08227	0.0487574	-0.334221	-0.248221	0.419554	-0.590049	0.03158	0.468395	-0.249951	-0.526112	0.427501	-0.47847	0.186638	0	NA	NA	0.04133	-8.05116
91	509	Nillson_TopS	509	510	NA	0.273894	-0.938074	0.127911	0.724973	-0.910311	0.0156999	0.195731	-0.77634	-0.0245849	0.395089	1.08741	0.338917	-0.0335974	0	-7588.63	15707.8	-3.17219	1.32407
69	510	Nillson_TopS	510	511	NA	-0.105862	0.532531	0.336294	-0.788016	-0.590883	2.25125	-1.02841	-1.61146	1.04756	2.00449	-1.63691	0.857167	0.545043	0	59425.3	-3691.58	-2.63306	16.7582
80	511	Nillson_TopS	511	512	NA	-1.15556	-0.558889	0.326925	0.676659	-1.00465	0.224313	0.519382	-0.253366	0.422968	0.619239	-0.328097	0.714234	0.385248	0	730.478	33797.2	-4.13488	11.909
87	512	Nillson_TopS	512	513	NA	1.63291	-0.757427	-0.289636	0.46831	-0.284904	-0.0372046	-0.3816	0.599111	-0.460543	-0.69273	0.453215	-0.480472	0.691179	0	-48600.8	-27926.2	-2.80321	-1.98428
87	513	Nillson_TopS	513	514	NA	2.00345	-0.425264	-0.417149	0.332099	-0.125014	0.0463215	0.00137452	0.332592	-0.282778	-1.04111	-0.369159	-0.486309	0.93111	0	NA	NA	-2.80321	-1.98428
90	514	Nillson_TopS	514	515	NA	1.16549	0.39462	-0.833999	-0.266975	0.786506	-0.393262	0.382767	0.00578769	0.171953	-0.881814	0.0429527	-0.347369	0.142916	0	NA	NA	0.04133	-8.05116
80	515	Nillson_TopS	515	516	NA	-0.931229	-0.635054	0.172618	0.369571	-0.954834	0.601449	0.555927	-0.350059	0.246705	1.02425	-0.982972	0.931446	0.650535	0	5026.8	38393.1	-4.13488	11.909
78	516	Nillson_TopS	516	517	NA	1.44157	0.117486	-1.03089	0.0577313	0.623092	-0.250683	0.27162	0.113541	-0.0413761	-1.06758	0.15461	-0.381178	0.469824	0	-51646.7	-26458.8	-1.47521	-5.09834
102	517	Nillson_TopS	517	518	NA	-0.50782	-0.22458	2.04769	-0.259222	-1.15367	0.663466	-0.619165	-0.525809	0.519943	1.24234	-0.810532	0.434343	0.0763079	0	27105.5	15814	-5.64805	12.479
81	518	Nillson_TopS	518	519	NA	0.835796	0.635496	-0.5828	-0.409374	1.16993	-0.475545	0.460807	0.254972	-0.0575513	-0.656235	-0.279464	-0.571763	0.0392309	0	NA	NA	3.47305	-13.3053
100	519	Nillson_TopS	519	520	NA	-1.11149	-0.635404	0.525864	-0.647969	-1.42325	0.934894	-1.16371	0.596729	-0.759151	1.8763	2.7911	0.631925	0.06669	0	31146.7	-14451.2	-0.457409	31.025
81	520	Nillson_TopS	520	521	NA	0.722955	0.255922	-0.493665	0.0105005	0.908989	-0.667383	0.284304	0.585298	0.00574983	-0.786297	-0.012751	-0.411661	-0.119485	0	NA	NA	3.47305	-13.3053
74	521	Nillson_TopS	521	522	NA	-0.508798	0.517891	-0.408986	0.0686279	0.823204	0.0285683	0.0260911	-0.109104	-0.55699	0.443445	1.19936	-0.416006	-0.814546	0	-7935.97	-21778.9	10.1585	-18.3044
87	522	Nillson_TopS	522	523	NA	1.51904	-0.20522	-0.292337	0.547489	0.19111	-0.338915	-0.253541	0.637477	-0.574604	-0.987215	0.413314	-0.666428	0.440476	0	NA	NA	-2.80321	-1.98428
90	523	Nillson_TopS	523	524	NA	0.742575	0.121234	-0.40609	-0.43448	0.46391	-0.508186	0.354802	0.539348	0.252293	-0.729179	0.237234	-0.162832	-0.241553	0	NA	NA	0.04133	-8.05116
96	524	Nillson_TopS	524	525	NA	0.132518	0.370096	-0.327152	-0.570144	0.640642	-0.455574	0.360637	1.08453	-0.0529406	-0.401256	0.842959	-0.491182	-0.774384	0	-34562.4	-19334.1	5.64891	-15.0421
89	525	Nillson_TopS	525	526	NA	-1.25973	0.231433	0.0705734	0.65756	0.642968	0.229817	-0.107997	-1.06878	-0.403345	0.776888	2.18694	-0.237245	-0.929183	0	-629.087	-22224.2	11.2514	-19.9456
79	526	Nillson_TopS	526	527	NA	0.0721465	0.311478	-0.324836	-0.642357	-1.18517	2.60468	-1.01588	-1.49451	-0.600079	2.40465	-0.57303	1.31748	0.86393	0	61032.3	-10752.9	-2.18619	19.1368
96	527	Nillson_TopS	527	528	NA	0.014562	0.95641	-0.733853	-0.52673	1.4244	-0.729993	0.701055	-0.414068	0.373358	-0.53288	0.383206	-0.034778	-0.435451	0	-36582.6	-20700.6	5.64891	-15.0421
103	528	Nillson_TopS	528	529	NA	0.109701	0.654022	0.103178	-0.731907	-0.798781	2.55554	-1.34078	-2.1157	-0.632526	1.98043	0.581328	0.774541	0.825047	0	57466.3	-12064.5	-1.77317	21.6487
90	529	Nillson_TopS	529	530	NA	1.22704	0.0628586	-0.631861	-0.126412	0.563562	-0.403445	0.205155	0.504242	-0.0906606	-0.936141	0.255056	-0.464328	0.197668	0	NA	NA	0.04133	-8.05116
96	530	Nillson_TopS	530	531	NA	0.410304	0.374204	-0.385031	-0.614315	1.0501	-0.691261	0.434184	0.763864	0.00913905	-0.545347	0.0961128	-0.302716	-0.279384	0	-39033.8	-22405.5	5.64891	-15.0421
101	531	Nillson_TopS	531	532	NA	0.88432	0.346712	-0.568655	-0.343939	1.02846	-0.497472	0.50225	0.371502	-0.326872	-0.551833	-0.155526	-0.386962	0.00229963	0	-44364.9	-23405.7	1.66122	-10.7159
90	532	Nillson_TopS	532	533	NA	1.37987	0.273006	-0.789798	-0.184517	0.757345	-0.440686	0.359123	0.284396	-0.214281	-1.04172	0.368893	-0.56944	0.304285	0	NA	NA	0.04133	-8.05116
90	533	Nillson_TopS	533	534	NA	1.23467	-0.226534	-0.419899	-0.117529	0.31398	-0.539572	0.0706747	0.576179	-0.278127	-0.542125	0.284126	-0.263721	0.147574	0	NA	NA	0.04133	-8.05116
93	534	Nillson_TopS	534	535	NA	-1.25636	-0.59975	0.788889	1.84381	-0.619814	-0.141057	0.155671	0.902137	0.200457	0.42248	-1.00499	0.401445	-0.137386	0	-2346.94	33646.5	-4.40299	4.80104
90	535	Nillson_TopS	535	536	NA	1.29658	-0.0733537	-0.608458	-0.122237	0.698036	-0.180259	0.163202	0.465064	-0.220169	-0.680001	0.132999	-0.640763	0.0844079	0	NA	NA	0.04133	-8.05116
90	536	Nillson_TopS	536	537	NA	1.50599	0.317932	-0.823113	-0.101972	0.711503	-0.418839	0.189267	0.236398	-0.27325	-0.836162	0.127687	-0.627703	0.422327	0	NA	NA	0.04133	-8.05116
90	537	Nillson_TopS	537	538	NA	1.3096	0.1136	-0.587775	0.0630066	0.589803	-0.431096	0.0794114	0.297967	-0.193791	-0.873632	-0.0119587	-0.40498	0.350429	0	NA	NA	0.04133	-8.05116
81	538	Nillson_TopS	538	539	NA	0.622891	0.361985	-0.114077	0.021064	0.779586	-0.748301	0.298633	0.79522	-0.0154125	-0.744327	-0.196598	-0.541553	-0.232307	0	NA	NA	3.47305	-13.3053
77	539	Nillson_TopS	539	540	NA	-0.0104947	0.737031	-0.462955	-0.137304	1.34268	-0.627023	0.455442	0.563432	-0.0294778	-0.161729	-0.0221334	-0.617659	-0.67818	0	-31655.9	-21681.4	7.51315	-16.4179
78	540	Nillson_TopS	540	541	NA	1.63808	0.188953	-0.704725	0.0284585	0.69283	-0.3693	0.0975691	-0.492039	-0.312325	-0.755851	0.225312	-0.403125	0.560758	0	-52255.4	-26760.5	-1.47521	-5.09834
90	541	Nillson_TopS	541	542	NA	0.793563	0.32306	-0.522989	0.125219	0.780269	-0.565873	0.270912	0.177951	0.076714	-0.757405	-0.124483	-0.319736	-0.016531	0	NA	NA	0.04133	-8.05116
101	542	Nillson_TopS	542	543	NA	0.570329	0.0585588	-0.390409	-0.482041	0.664896	-0.607349	0.359923	0.506099	0.106404	-0.580967	0.397474	-0.202644	-0.17438	0	-41638.1	-24222.8	1.66122	-10.7159
81	543	Nillson_TopS	543	544	NA	0.157488	0.355449	-0.306321	-0.322472	0.989873	-0.426925	0.374026	0.469839	-0.287815	-0.386995	0.424157	-0.444179	-0.372797	0	-35170.2	-22254.2	3.47305	-13.3053
100	544	Nillson_TopS	544	545	NA	-0.974065	-0.521416	0.408383	-0.659181	-1.63034	1.01512	-1.10133	1.02839	-0.732289	1.83688	2.50753	0.703669	-0.234605	0	29751.4	-13826.4	-0.457409	31.025
71	545	Nillson_TopS	545	546	NA	-1.33824	-0.406513	3.48753	-0.361789	-0.277304	-0.772795	-0.0964451	-0.250654	1.52323	-0.895383	-0.222755	0.67645	0.259774	0	NA	NA	-7.2091	4.52457
87	546	Nillson_TopS	546	547	NA	2.28329	-0.578189	-0.304416	0.826188	-0.187777	0.0629209	-0.21031	0.517778	-0.424628	-1.19521	-0.579251	-0.629649	1.16781	0	NA	NA	-2.80321	-1.98428
90	547	Nillson_TopS	547	548	NA	1.64703	0.115228	-0.852822	0.336906	0.671719	-0.252905	0.151148	0.0750789	-0.0863482	-1.00321	-0.503745	-0.509489	0.714297	0	NA	NA	0.04133	-8.05116
87	548	Nillson_TopS	548	549	NA	1.34562	-0.362626	-0.430899	-0.0686899	0.14033	-0.528765	0.282211	1.00187	-0.128822	-0.882313	-0.0599466	-0.28984	0.342891	0	NA	NA	-2.80321	-1.98428
90	549	Nillson_TopS	549	550	NA	1.03461	0.795756	-0.653649	0.169856	1.20643	-0.482043	0.490541	0.329865	-0.177132	-0.875758	-0.504141	-0.787392	-0.0277322	0	NA	NA	0.04133	-8.05116
86	550	Nillson_TopS	550	551	NA	-1.33629	-0.489299	1.05161	0.623691	-1.11165	0.166014	0.238718	1.43572	0.473847	0.70811	-1.19655	0.745896	-0.249002	0	-3706.39	34476.4	-4.2936	8.20126
89	551	Nillson_TopS	551	552	NA	-1.24812	0.628962	0.0895563	0.564583	1.06622	0.342315	0.0494687	-1.50645	-0.354991	0.792982	1.53544	-0.0615137	-1.14016	0	-1648.04	-23399.6	11.2514	-19.9456
103	552	Nillson_TopS	552	553	NA	-0.38307	-0.0608899	0.109284	-0.315838	-0.873628	2.11966	-1.05691	-1.81553	-0.331231	2.19485	0.523146	0.900915	0.558533	0	56475	-12206.8	-1.77317	21.6487
90	553	Nillson_TopS	553	554	NA	1.49758	-0.183328	-0.453506	0.400093	0.402206	-0.365461	0.0924258	0.225213	-0.198123	-1.03401	-0.120803	-0.355892	0.438195	0	-53121.4	-27848.3	0.04133	-8.05116
81	554	Nillson_TopS	554	555	NA	0.54863	0.406451	-0.661364	-0.385203	0.95257	-0.578002	0.591391	0.136178	0.138145	-0.589453	0.165979	-0.121845	-0.309249	0	NA	NA	3.47305	-13.3053
90	555	Nillson_TopS	555	556	NA	1.18102	-0.250405	-0.594642	-0.189827	0.370162	-0.344702	0.316942	-0.0190546	0.0823156	-0.589791	0.170652	-0.165955	0.258153	0	NA	NA	0.04133	-8.05116
90	556	Nillson_TopS	556	557	NA	1.1054	0.0916587	-0.312663	0.244281	0.716687	-0.625269	0.227459	0.436119	-0.211295	-0.88759	0.0543697	-0.679772	0.144387	0	NA	NA	0.04133	-8.05116
100	557	Nillson_TopS	557	558	NA	-0.755201	-0.852343	0.742578	-0.573205	-1.55912	1.04713	-1.40575	0.404443	-1.00886	1.58564	2.57806	0.553068	1.04351	0	30790.7	-13819.8	-0.457409	31.025
90	558	Nillson_TopS	558	559	NA	1.25412	0.0947016	-0.547924	0.0927768	0.709756	-0.26748	0.250163	-0.153192	-0.103321	-0.893494	-0.0263572	-0.362188	0.231954	0	NA	NA	0.04133	-8.05116
101	559	Nillson_TopS	559	560	NA	0.994699	0.549443	-0.612248	-0.00824082	1.06326	-0.45107	0.435195	-0.0819219	0.140671	-0.92122	-0.300494	-0.407564	-0.0409525	0	-46044.2	-22999.9	1.66122	-10.7159
87	560	Nillson_TopS	560	561	NA	1.55987	-0.191251	-0.393227	0.200081	0.289694	-0.280894	0.137433	0.582092	-0.374564	-0.995784	-0.126764	-0.489823	0.445236	0	NA	NA	-2.80321	-1.98428
87	561	Nillson_TopS	561	562	NA	1.63545	-0.0776092	-0.740286	0.0840071	0.211446	-0.239652	0.294388	0.323986	-0.111512	-0.727529	-0.686459	-0.141633	0.569714	0	NA	NA	-2.80321	-1.98428
104	562	Nillson_TopS	562	563	NA	-0.506928	-0.202388	0.305234	-0.904125	-1.56732	1.94525	-1.44058	-0.849962	-0.784119	1.85165	3.24913	0.642868	0.264616	0	47108	-17312.8	-1.20331	25.4698
90	563	Nillson_TopS	563	564	NA	1.29874	0.102844	-0.289979	-0.034931	0.665303	-0.488211	0.127149	-0.00586974	-0.113437	-0.912946	0.0739586	-0.410178	0.263497	0	NA	NA	0.04133	-8.05116
81	564	Nillson_TopS	564	565	NA	0.36499	1.17601	-1.08297	-0.260665	1.51004	-0.484343	0.624315	-0.0660628	-0.00467271	-0.296372	0.0870907	-0.611956	-0.414009	0	NA	NA	3.47305	-13.3053
71	565	Nillson_TopS	565	566	NA	-1.14973	-0.360386	2.33692	-0.152323	-0.457716	-0.587032	-0.00989467	0.549852	1.42827	-0.356104	-1.04613	0.736069	0.151119	0	13177.7	15000.2	-7.2091	4.52457
71	566	Nillson_TopS	566	567	NA	-0.910268	-0.273176	2.07679	-0.121885	-0.202576	-0.255748	-0.168241	0.328435	1.44213	-0.215868	-0.841039	0.257403	-0.368866	0	13154.3	15329.7	-7.2091	4.52457
90	567	Nillson_TopS	567	568	NA	1.38326	0.0989042	-0.597336	-0.00869793	0.551454	-0.289253	0.0958744	-0.0401534	-0.152779	-1.00799	0.221865	-0.422657	0.499197	0	NA	NA	0.04133	-8.05116
95	568	Nillson_TopS	568	569	NA	-1.21627	-0.347286	0.994312	-0.0581442	-0.486784	0.0772879	-0.161577	1.03509	1.36324	0.470329	-0.994718	0.300002	-0.247569	0	12630.2	18785	-5.89098	4.66014
90	569	Nillson_TopS	569	570	NA	0.891001	-0.145196	-0.777821	-0.152762	0.653786	-0.321684	0.331377	0.562682	-0.0917192	-0.456853	0.116087	-0.303465	-0.0260633	0	-45453.6	-25630.8	0.04133	-8.05116
68	570	Nillson_TopS	570	571	NA	-0.936693	0.149687	1.6478	0.825968	-0.609236	0.450334	-0.967826	-0.197934	-0.0379513	0.873401	-0.478918	-0.0379278	0.137625	0	NA	NA	-7.16747	12.5824
87	571	Nillson_TopS	571	572	NA	1.49642	-0.114678	-0.885601	-0.121737	0.23129	-0.21194	0.0586808	0.403151	-0.0507501	-0.831076	0.364965	-0.429209	0.498886	0	NA	NA	-2.80321	-1.98428
73	572	Nillson_TopS	572	573	NA	-0.839475	-1.28293	2.68617	4.66054	0.23421	-0.281851	-0.23907	-1.52572	-0.198803	0.0635504	0.705921	-0.619341	-0.973665	0	-1285.91	2608.04	-4.75949	1.27338
90	573	Nillson_TopS	573	574	NA	1.18815	0.113504	-0.445663	-0.20927	0.561786	-0.316615	0.303194	0.451455	0.0778329	-0.808389	-0.650331	-0.25692	0.283782	0	NA	NA	0.04133	-8.05116
71	574	Nillson_TopS	574	575	NA	-0.773509	-0.462851	2.72033	-0.243628	-0.448687	-0.14826	-0.406091	0.0202865	1.15154	-0.0678616	-0.775115	0.448617	-0.155141	0	13799.5	13553.1	-7.2091	4.52457
88	575	Nillson_TopS	575	576	NA	-0.601573	0.109479	0.752999	-0.965779	-1.36833	1.75187	-1.35866	-1.3261	0.238191	1.2571	2.37173	0.367378	0.269565	0	53050.1	-17127.5	-1.47868	23.5644
71	576	Nillson_TopS	576	577	NA	-1.20227	-0.495991	3.27912	-0.359697	-0.333852	-0.3521	-0.100001	-0.324247	1.38242	-0.606627	-0.713715	0.661033	0.33271	0	14601.1	11825.5	-7.2091	4.52457
104	577	Nillson_TopS	577	578	NA	-0.274874	-0.136108	0.513688	-0.539306	-1.38918	1.98524	-1.26215	-2.08385	-0.692805	2.04675	3.24114	0.858081	0.332299	0	48339.9	-17217.4	-1.20331	25.4698
81	578	Nillson_TopS	578	579	NA	0.246867	0.217456	-0.432506	-0.0222306	0.74337	-0.692165	0.455002	0.531776	0.152293	-0.774877	0.204083	-0.168501	-0.218627	0	-39964.7	-22576.5	3.47305	-13.3053
90	579	Nillson_TopS	579	580	NA	0.999436	0.285412	-0.68556	-0.0594226	0.831975	-0.538244	0.343177	0.0209963	0.0292491	-0.775677	-0.0507541	-0.181171	0.0610889	0	NA	NA	0.04133	-8.05116
101	580	Nillson_TopS	580	581	NA	0.734061	0.574936	-0.760082	-0.210892	1.1308	-0.587263	0.583687	0.149931	0.150965	-0.796819	-0.453302	-0.203507	0.0695332	0	NA	NA	1.66122	-10.7159
90	581	Nillson_TopS	581	582	NA	1.49413	0.0806124	-0.506539	0.563283	0.611628	-0.27109	0.218659	-0.313562	-0.0827352	-1.02533	-0.452856	-0.448953	0.527524	0	NA	NA	0.04133	-8.05116
90	582	Nillson_TopS	582	583	NA	1.09703	0.175009	-0.454879	-0.342684	0.635282	-0.464833	0.175094	0.523813	-0.104882	-0.848363	0.211145	-0.414997	0.103576	0	-46938.5	-25971.3	0.04133	-8.05116
94	583	Nillson_TopS	583	584	NA	-0.768337	0.735533	-0.420215	-0.464207	1.1573	0.21158	0.231944	-0.685709	-0.297079	0.739886	0.982257	-0.130212	-0.862536	0	-3773.45	-24913.1	11.5245	-18.2658
71	584	Nillson_TopS	584	585	NA	-1.17509	-0.459258	3.30399	-0.367536	-0.238763	-0.584886	-0.0340335	-0.270487	1.36134	-0.72942	-0.679959	0.687763	0.392862	0	NA	NA	-7.2091	4.52457
87	585	Nillson_TopS	585	586	NA	1.47451	-0.0208173	-0.386718	0.0121286	0.314045	-0.287694	0.201271	0.132313	-0.426028	-0.974676	0.232581	-0.36913	0.419361	0	-52543	-28402.1	-2.80321	-1.98428
90	586	Nillson_TopS	586	587	NA	0.935381	0.27116	-0.602329	-0.224105	0.709347	-0.488877	0.112705	0.626701	-0.290071	-0.689525	0.247382	-0.351831	0.0256647	0	NA	NA	0.04133	-8.05116
72	587	Nillson_TopS	587	588	NA	-0.0156999	-0.431779	-0.0876898	0.502832	-0.0867663	0.253109	-0.685085	0.601544	-1.05371	0.706091	1.34938	-0.136051	-0.515884	0	-2554.25	-15113	8.83648	-17.3626
104	588	Nillson_TopS	588	589	NA	-0.305723	-0.041444	0.160728	-0.504369	-0.767417	2.02888	-1.11585	-2.17119	-0.431941	2.15864	1.63164	0.877606	0.398288	0	50295.8	-14284.8	-1.20331	25.4698
90	589	Nillson_TopS	589	590	NA	0.946874	0.0432256	-0.652353	0.12175	0.572637	-0.517317	0.441288	0.179917	-0.0924333	-0.732673	-0.121846	-0.0919257	0.146415	0	NA	NA	0.04133	-8.05116
76	590	Nillson_TopS	590	591	NA	-1.53479	-0.779728	0.769649	0.543069	-0.92694	-0.257381	0.550529	1.34431	0.399669	0.0951748	0.357403	0.564752	-0.247287	0	NA	NA	-3.9653	1.78471
69	591	Nillson_TopS	591	592	NA	-0.321249	0.250627	1.04381	-0.650121	-0.959819	2.09919	-1.2086	-2.17621	0.331934	1.93018	0.193442	0.722487	0.547528	0	57658.9	-9171.9	-2.63306	16.7582
90	592	Nillson_TopS	592	593	NA	0.16108	0.0985657	0.178853	-0.139698	0.826603	-0.746831	0.160842	1.3927	-0.273019	-0.384288	0.478862	-0.649249	-0.710216	0	NA	NA	0.04133	-8.05116
81	593	Nillson_TopS	593	594	NA	0.319713	0.617411	-0.508206	0.134931	1.14214	-0.714629	0.575791	0.249844	0.230953	-0.798288	-0.189696	-0.31392	-0.410905	0	NA	NA	3.47305	-13.3053
90	594	Nillson_TopS	594	595	NA	1.54234	0.0790602	-0.655786	-0.0567229	0.363871	-0.33093	0.0887533	0.211914	-0.35453	-0.715477	0.121619	-0.373489	0.395279	0	NA	NA	0.04133	-8.05116
87	595	Nillson_TopS	595	596	NA	1.45601	-0.169959	-0.335224	0.0743839	0.364499	-0.424105	0.207211	0.604754	-0.182678	-0.950801	-0.325817	-0.409675	0.438611	0	-52146.8	-27053.5	-2.80321	-1.98428
90	596	Nillson_TopS	596	597	NA	1.26996	0.403371	-0.912422	-0.0596787	0.817366	-0.399488	0.264512	-0.0514803	0.0387268	-0.854745	-0.281953	-0.185709	0.351874	0	NA	NA	0.04133	-8.05116
87	597	Nillson_TopS	597	598	NA	1.12332	-0.0829509	-0.64675	0.233849	0.475794	-0.504863	0.19251	0.989537	-0.250037	-0.877227	0.0246931	-0.497512	0.1804	0	-49277.8	-27241.5	-2.80321	-1.98428
87	598	Nillson_TopS	598	599	NA	1.90052	-0.070339	-0.960155	0.36497	0.493163	0.00111783	0.0416361	0.258498	-0.519057	-0.930929	-0.30459	-0.555672	0.864601	0	NA	NA	-2.80321	-1.98428
81	599	Nillson_TopS	599	600	NA	0.934762	0.709032	-0.642486	-0.27154	1.32562	-0.379388	0.497138	-0.08143	0.218476	-0.708303	-0.753526	-0.337875	-0.0731489	0	NA	NA	3.47305	-13.3053
90	600	Nillson_TopS	600	601	NA	1.06178	-0.0426391	-0.563883	-0.231325	0.363048	-0.507975	0.437552	0.0525749	0.151682	-0.711864	0.0221273	-0.054193	0.24651	0	NA	NA	0.04133	-8.05116
90	601	Nillson_TopS	601	602	NA	1.34995	0.144	-0.543771	-0.208647	0.618691	-0.440285	0.247994	0.229779	-0.0337991	-1.00314	-0.108096	-0.267222	0.350648	0	NA	NA	0.04133	-8.05116
76	602	Nillson_TopS	602	603	NA	-1.26862	-0.561175	0.810821	0.378805	-1.11637	-0.141613	0.363714	0.971042	0.385723	0.255703	0.395599	0.538653	-0.347921	0	-6512.81	26927.1	-3.9653	1.78471
90	603	Nillson_TopS	603	604	NA	1.30593	0.215529	-0.596698	-0.0666832	0.563337	-0.378706	0.0137232	0.576478	-0.0230166	-0.758342	-0.29508	-0.455105	0.206854	0	NA	NA	0.04133	-8.05116
71	604	Nillson_TopS	604	605	NA	-1.19143	-0.360522	1.53515	0.164898	-0.399667	0.0105058	-0.045395	0.778119	1.4811	0.232987	-1.25001	0.32348	-0.354803	0	13080.4	17695.5	-7.2091	4.52457
96	605	Nillson_TopS	605	606	NA	0.373917	0.316967	-0.282353	-0.448821	0.688283	-0.74487	0.243911	0.800211	0.0636373	-0.388159	0.292887	-0.469301	-0.198886	0	-37634.3	-21791.4	5.64891	-15.0421
81	606	Nillson_TopS	606	607	NA	0.446586	0.674887	-0.473154	-0.348638	1.20398	-0.630069	0.463451	0.396818	0.0436791	-0.59608	0.0294258	-0.470995	-0.400571	0	NA	NA	3.47305	-13.3053
78	607	Nillson_TopS	607	608	NA	1.77816	0.0838122	-0.645348	0.185075	0.557382	-0.140656	0.189144	0.0348567	-0.311548	-0.974908	-0.30856	-0.656213	0.669825	0	NA	NA	-1.47521	-5.09834
101	608	Nillson_TopS	608	609	NA	0.629898	0.580434	-0.667653	-0.284907	1.1436	-0.63229	0.345777	0.868966	-0.288745	-0.547149	0.0104121	-0.563176	-0.199024	0	NA	NA	1.66122	-10.7159
87	609	Nillson_TopS	609	610	NA	1.70529	0.177344	-0.696556	0.17011	0.627432	-0.127294	0.051407	0.739888	-0.325897	-0.847879	-0.664806	-0.768489	0.498004	0	NA	NA	-2.80321	-1.98428
95	610	Nillson_TopS	610	611	NA	-0.956322	-0.171827	1.09231	-0.141314	-0.386556	-0.186257	-0.252227	0.98797	1.6753	0.345421	-0.88305	0.230616	-0.621271	0	12375.8	18223	-5.89098	4.66014
90	611	Nillson_TopS	611	612	NA	0.823212	0.120137	-0.471421	-0.328903	0.572654	-0.523768	0.386982	0.271433	-0.070334	-0.664915	0.197649	-0.157461	0.0445492	0	NA	NA	0.04133	-8.05116
90	612	Nillson_TopS	612	613	NA	1.26052	-0.0268192	-0.536835	0.0978569	0.453563	-0.258234	-0.00347886	0.56591	-0.515184	-0.766519	0.305438	-0.491685	0.213852	0	NA	NA	0.04133	-8.05116
81	613	Nillson_TopS	613	614	NA	0.393014	0.503927	-0.586721	-0.271446	1.06628	-0.541972	0.351997	0.781896	-0.0334865	-0.671404	0.22496	-0.42838	-0.453831	0	-38046.1	-22439.1	3.47305	-13.3053
90	614	Nillson_TopS	614	615	NA	0.669837	-0.10729	-0.509327	-0.215545	0.40068	-0.418946	0.335496	0.129984	0.0269667	-0.596472	0.511565	-0.0378417	-0.0191	0	NA	NA	0.04133	-8.05116
74	615	Nillson_TopS	615	616	NA	-1.01114	0.825756	-0.180583	-0.0145777	1.19425	0.41911	0.370777	-1.76549	-0.185227	1.0475	0.761203	-0.0663932	-0.621433	0	-1458.15	-26092.4	10.1585	-18.3044
90	616	Nillson_TopS	616	617	NA	1.34453	0.17046	-0.0103308	0.618761	0.779222	-0.521035	0.0816372	0.757158	-0.262741	-1.07196	-0.756042	-0.923584	0.356874	0	NA	NA	0.04133	-8.05116
90	617	Nillson_TopS	617	618	NA	0.888597	0.468654	-0.377057	-0.362582	0.94988	-0.624671	0.290707	0.439113	-0.23472	-0.661142	0.340423	-0.771355	0.0168582	0	NA	NA	0.04133	-8.05116
101	618	Nillson_TopS	618	619	NA	0.800998	0.289128	-0.631437	-0.0264144	0.744945	-0.573629	0.466964	0.442624	-0.0168807	-0.721608	-0.397167	-0.0740755	-0.0149219	0	NA	NA	1.66122	-10.7159
78	619	Nillson_TopS	619	620	NA	1.11052	-0.335511	-0.558202	-0.363104	0.0308137	-0.211706	0.155552	0.148201	-0.0580991	-0.441294	0.753163	-0.128124	0.128861	0	-49578.7	-28216.4	-1.47521	-5.09834
71	620	Nillson_TopS	620	621	NA	-1.2157	-0.0248993	1.42049	0.473375	-0.373819	-0.260174	0.170317	-0.145748	1.44167	-0.212071	-0.899645	0.402473	0.0945848	0	12167.9	15756.3	-7.2091	4.52457
81	621	Nillson_TopS	621	622	NA	0.464803	0.622275	-0.417016	-0.394646	1.07699	-0.747687	0.626193	-0.0695195	0.344799	-0.731559	-0.253941	-0.00820354	-0.194154	0	NA	NA	3.47305	-13.3053
68	622	Nillson_TopS	622	623	NA	-0.971723	0.281203	1.46085	0.703474	-0.935025	0.417217	-1.10168	0.586124	-0.109668	1.07905	-0.538552	0.371584	-0.227522	0	28765.4	22713.4	-7.16747	12.5824
90	623	Nillson_TopS	623	624	NA	1.45977	0.0449339	-0.341417	-0.123373	0.30543	-0.317452	-0.162064	1.04221	-0.642924	-0.555598	0.210887	-0.60463	0.0499151	0	NA	NA	0.04133	-8.05116
87	624	Nillson_TopS	624	625	NA	1.25487	-0.268666	-0.375477	-0.141872	0.167072	-0.423371	0.177615	0.719043	-0.0592604	-0.770327	-0.223828	-0.133579	0.333575	0	NA	NA	-2.80321	-1.98428
101	625	Nillson_TopS	625	626	NA	0.924298	0.200241	-0.777213	-0.232061	0.799588	-0.398941	0.267915	0.282866	-0.0339878	-0.687575	0.263088	-0.313431	0.0068671	0	NA	NA	1.66122	-10.7159
101	626	Nillson_TopS	626	627	NA	0.911619	0.174965	-0.506704	-0.249473	0.619802	-0.540354	0.27245	0.451077	-0.0772304	-0.72417	0.0980678	-0.197182	-0.00323902	0	NA	NA	1.66122	-10.7159
95	627	Nillson_TopS	627	628	NA	-1.14713	-0.0341373	1.5855	0.0132203	-0.530493	-0.20401	0.0543411	1.25103	0.927506	0.105436	-0.814413	0.0505329	-0.465514	0	11891.2	17983.6	-5.89098	4.66014
87	628	Nillson_TopS	628	629	NA	1.37422	-0.198264	-0.307	-0.00939792	0.224341	-0.322325	-0.168181	0.394355	-0.390428	-0.725444	0.444062	-0.557863	0.534587	0	NA	NA	-2.80321	-1.98428
87	629	Nillson_TopS	629	630	NA	1.61488	-0.475298	0.675247	0.258832	-0.145303	-0.107038	-0.430195	0.193369	-0.0906088	-0.856878	-0.239764	-0.619745	0.599748	0	NA	NA	-2.80321	-1.98428
71	630	Nillson_TopS	630	631	NA	-1.32543	-0.281632	3.46192	-0.335102	-0.316439	-0.797789	-0.0119588	-0.431173	1.56402	-0.688458	-0.62391	0.812462	0.312519	0	14264	11261	-7.2091	4.52457
68	631	Nillson_TopS	631	632	NA	-1.13591	0.140582	1.83689	0.883127	-0.880054	0.391294	-0.911852	0.0250054	-0.0711033	1.05544	-0.629648	0.363619	-0.0280071	0	30325.3	22723.1	-7.16747	12.5824
71	632	Nillson_TopS	632	633	NA	-2.04679	2.24563	3.14388	-1.0507	1.28433	-1.38266	0.713525	-0.535873	4.46487	-0.905261	-1.70085	0.833422	-1.32677	0	19862.1	9255.7	-7.2091	4.52457
94	633	Nillson_TopS	633	634	NA	-1.05943	0.903865	0.0369115	0.092991	1.38194	0.192642	0.439434	-2.2186	0.0464414	0.77606	1.51252	-0.0383679	-0.846898	0	NA	NA	11.5245	-18.2658
84	634	Nillson_TopS	634	635	NA	-0.802918	-0.721698	0.923497	-0.276834	-0.805215	0.69948	0.506361	-1.37337	0.858887	1.2608	-0.916576	1.10819	0.630693	0	9228.61	38662.4	-3.02112	14.8073
90	635	Nillson_TopS	635	636	NA	1.11485	-0.0157544	-0.472176	-0.209824	0.474609	-0.458864	0.19948	0.525986	-0.248328	-0.726447	0.22115	-0.278285	0.114281	0	NA	NA	0.04133	-8.05116
94	636	Nillson_TopS	636	637	NA	-0.799494	0.94958	-0.774373	-0.506251	1.4722	0.560109	0.575136	-1.78103	-0.0696955	1.28891	0.327317	0.282884	-0.511892	0	-1500.75	-26949.2	11.5245	-18.2658
81	637	Nillson_TopS	637	638	NA	0.402457	0.659681	-0.339641	-0.173837	1.22181	-0.630588	0.546331	0.534145	0.142934	-0.637259	-0.378031	-0.495739	-0.498379	0	NA	NA	3.47305	-13.3053
73	638	Nillson_TopS	638	639	NA	-1.66323	-1.00826	2.58476	4.66629	0.203842	-0.678427	0.406178	-0.810942	0.136335	-0.347098	-0.316433	-0.0514949	-0.821689	0	-2705.28	10287.9	-4.75949	1.27338
81	639	Nillson_TopS	639	640	NA	0.380987	0.468251	-0.91981	-0.259513	1.11909	-0.578251	0.574266	0.864312	0.0204351	-0.469936	-0.289767	-0.150835	-0.354031	0	-39591.3	-22404.9	3.47305	-13.3053
90	640	Nillson_TopS	640	641	NA	1.19222	0.0314383	-0.223366	0.0670819	0.46152	-0.469029	0.0521462	0.544453	-0.154245	-0.843672	-0.170068	-0.475197	0.236351	0	NA	NA	0.04133	-8.05116
76	641	Nillson_TopS	641	642	NA	-1.29798	-0.560548	0.61749	0.0783024	-1.09854	0.0856752	0.239289	1.33819	0.31572	0.20669	0.666836	0.400342	-0.284365	0	NA	NA	-3.9653	1.78471
96	642	Nillson_TopS	642	643	NA	0.185256	0.746713	-0.870587	-0.515873	1.25389	-0.473738	0.521419	0.43581	0.173758	-0.48088	0.262786	-0.375295	-0.462772	0	-37372.7	-22006.4	5.64891	-15.0421
102	643	Nillson_TopS	643	644	NA	-0.849929	-0.47445	1.13228	-0.26308	-1.10627	0.845091	-0.809167	-0.155042	0.190115	1.42016	0.309679	0.453703	-0.0188085	0	28068.2	9882.77	-5.64805	12.479
87	644	Nillson_TopS	644	645	NA	1.4716	-0.0085353	-0.955953	-0.00934879	0.319713	-0.332289	0.0924744	1.03303	-0.303322	-0.657367	-0.316669	-0.209193	0.329266	0	NA	NA	-2.80321	-1.98428
90	645	Nillson_TopS	645	646	NA	1.48143	0.247847	-0.366632	-0.050197	0.734062	-0.27607	0.250842	0.0670923	-0.314051	-1.10601	-0.238181	-0.483197	0.435241	0	NA	NA	0.04133	-8.05116
94	646	Nillson_TopS	646	647	NA	-1.01185	0.775217	-0.0972406	-0.783887	1.18254	0.490373	0.271774	-2.48883	0.0221015	1.15061	2.79001	0.155292	-0.721981	0	3672.57	-25439.4	11.5245	-18.2658
88	647	Nillson_TopS	647	648	NA	-0.357252	0.22178	0.335117	-0.724728	-1.16916	1.96769	-1.51984	-1.00961	0.0855133	1.36827	1.52458	0.287897	0.256594	0	55815.6	-16126.7	-1.47868	23.5644
74	648	Nillson_TopS	648	649	NA	-1.06713	0.556424	-0.277116	0.150786	1.00951	0.345159	0.168836	-1.50869	-0.561298	0.972383	1.82889	-0.0309021	-0.795647	0	-444.419	-24010.9	10.1585	-18.3044
90	649	Nillson_TopS	649	650	NA	1.49601	0.0435972	-0.739207	0.187681	0.551816	-0.380262	0.138464	0.623842	-0.416943	-0.836265	-0.125056	-0.534435	0.393065	0	NA	NA	0.04133	-8.05116
90	650	Nillson_TopS	650	651	NA	1.15775	0.286616	-0.645937	-0.158691	0.833469	-0.441362	0.25603	0.130427	-0.163943	-0.777555	0.0830441	-0.465153	0.214964	0	NA	NA	0.04133	-8.05116
71	651	Nillson_TopS	651	652	NA	-1.32241	-0.255891	3.38655	-0.395938	-0.324531	-0.693814	-0.126852	-0.24832	1.56636	-0.576553	-0.849349	0.752735	0.316452	0	14318.9	12265	-7.2091	4.52457
90	652	Nillson_TopS	652	653	NA	1.43049	0.120547	-0.226909	0.482265	0.57712	-0.400223	0.0470483	-0.130837	-0.294107	-0.910971	-0.148425	-0.619646	0.39916	0	NA	NA	0.04133	-8.05116
87	653	Nillson_TopS	653	654	NA	1.77629	-0.18635	-0.42326	0.234742	0.0167334	-0.0842224	-0.238592	0.251899	-0.540088	-0.793072	0.331003	-0.631797	0.68883	0	NA	NA	-2.80321	-1.98428
81	654	Nillson_TopS	654	655	NA	0.516437	1.08067	-0.640854	-0.208129	1.65195	-0.619302	0.750466	0.392774	0.25847	-0.826353	-0.668942	-0.559214	-0.537171	0	NA	NA	3.47305	-13.3053
101	655	Nillson_TopS	655	656	NA	0.720137	0.372343	-0.506967	-0.0351314	0.865392	-0.49459	0.340833	0.929044	-0.122922	-0.640439	-0.596359	-0.418659	-0.0871707	0	NA	NA	1.66122	-10.7159
81	656	Nillson_TopS	656	657	NA	0.598171	0.863467	-0.452045	-0.221592	1.23655	-0.671069	0.536296	-0.239562	0.0776621	-0.745917	-0.181183	-0.254922	-0.20773	0	NA	NA	3.47305	-13.3053
90	657	Nillson_TopS	657	658	NA	1.47289	0.0206386	-0.705799	0.344059	0.449906	-0.37101	0.0690636	0.401259	-0.527265	-0.907828	0.243649	-0.59322	0.499324	0	-51444	-28427.8	0.04133	-8.05116
76	658	Nillson_TopS	658	659	NA	-1.43396	-0.278411	0.718148	0.0450477	-0.927398	-0.316732	0.405784	1.5732	0.37056	0.335151	-0.0948351	0.663851	-0.305792	0	NA	NA	-3.9653	1.78471
87	659	Nillson_TopS	659	660	NA	1.61029	-0.425883	-0.520548	0.338311	0.210201	-0.34813	0.0333063	0.114206	-0.0975297	-0.760748	-0.112433	-0.23908	0.525319	0	-53656.7	-28485.5	-2.80321	-1.98428
81	660	Nillson_TopS	660	661	NA	0.681759	0.225683	-0.626049	-0.184336	0.656812	-0.566035	0.161241	0.254957	-0.0514529	-0.462023	0.44126	-0.123665	-0.195151	0	NA	NA	3.47305	-13.3053
90	661	Nillson_TopS	661	662	NA	1.0434	-0.211947	-0.211576	0.0936284	0.446962	-0.584061	0.142786	0.214348	-0.0574324	-0.828537	0.297385	-0.286172	0.152621	0	NA	NA	0.04133	-8.05116
78	662	Nillson_TopS	662	663	NA	1.61768	0.0487976	-0.335761	0.437427	0.636996	-0.26196	0.175457	0.109844	-0.165445	-1.1181	-0.774859	-0.411901	0.480361	0	NA	NA	-1.47521	-5.09834
87	663	Nillson_TopS	663	664	NA	0.986525	-0.472856	-0.423266	-0.0769805	-0.134697	-0.375291	0.043491	1.89709	-0.363415	-0.477467	0.21762	-0.486895	0.0629103	0	NA	NA	-2.80321	-1.98428
87	664	Nillson_TopS	664	665	NA	1.45382	-0.349688	-0.576504	0.323653	0.12176	-0.307279	0.0845876	0.852081	-0.0407233	-0.962905	-0.387604	-0.33977	0.514146	0	NA	NA	-2.80321	-1.98428
76	665	Nillson_TopS	665	666	NA	-1.31689	-0.786738	0.904091	-0.155823	-1.04898	0.193099	0.430759	0.983308	0.516791	0.552883	-0.0915027	0.586767	-0.0817475	0	-5492.27	29883.1	-3.9653	1.78471
95	666	Nillson_TopS	666	667	NA	-0.83034	-0.304667	1.81416	-0.312294	-0.0672877	-0.00660556	-0.257152	0.803902	0.865027	0.268237	-0.829166	-0.126457	-0.414169	0	12610	17250.1	-5.89098	4.66014
94	667	Nillson_TopS	667	668	NA	-0.953339	1.20583	-0.178243	-0.0964397	1.64381	0.233817	0.697154	-2.29769	0.180842	0.75547	0.886888	0.0712552	-0.973895	0	NA	NA	11.5245	-18.2658
78	668	Nillson_TopS	668	669	NA	1.03357	0.14479	0.0803305	1.06725	0.652393	-0.514217	0.12258	0.235205	-0.162289	-1.13719	-0.629678	-0.629658	0.179192	0	-49433.9	-24617.8	-1.47521	-5.09834
92	669	Nillson_TopS	669	670	NA	0.410079	1.22412	-0.76871	-0.312159	1.64943	-0.805206	0.623842	0.473055	0.207248	-0.651205	-0.366796	-0.553785	-0.529626	0	-38524.5	-20727.6	2.70687	-14.5254
74	670	Nillson_TopS	670	671	NA	-0.802958	0.639975	-0.0838977	0.283265	1.04109	-0.115617	0.195203	-0.751804	-0.411614	0.416126	1.50705	-0.38148	-1.03755	0	-4844.88	-23333.5	10.1585	-18.3044
69	671	Nillson_TopS	671	672	NA	-0.145769	0.446169	0.702635	-0.731479	-0.773696	2.16785	-0.882396	-2.10949	1.19694	1.85435	-1.19512	0.805124	0.582819	0	58448.1	-3385.73	-2.63306	16.7582
90	672	Nillson_TopS	672	673	NA	0.378994	0.0188632	0.0712359	-0.0711766	0.433525	-0.526974	0.155186	0.716732	-0.0109257	-0.738564	0.110324	-0.261028	-0.119372	0	NA	NA	0.04133	-8.05116
82	673	Nillson_TopS	673	674	NA	-0.984101	0.0813305	0.719845	0.445479	-0.438346	-0.119599	0.940776	-0.721506	1.31045	-0.12454	-0.944498	1.01109	-0.336792	0	8904.28	15645.8	-2.09482	14.9584
81	674	Nillson_TopS	674	675	NA	0.659326	0.633886	-0.437419	-0.430947	1.13076	-0.504452	0.302168	0.72169	-0.179182	-0.580257	-0.15346	-0.458841	-0.366909	0	NA	NA	3.47305	-13.3053
90	675	Nillson_TopS	675	676	NA	1.0071	0.196219	-0.897137	0.0921339	0.648158	-0.409438	0.212729	0.320537	-0.0483068	-0.699392	-0.0627913	-0.277359	0.213668	0	NA	NA	0.04133	-8.05116
95	676	Nillson_TopS	676	677	NA	-0.896619	-0.100495	1.79191	-0.0564813	-0.271613	-0.223723	-0.319992	1.42173	0.844125	0.299598	-0.732512	-0.0786644	-0.873456	0	11187.2	18657.8	-5.89098	4.66014
87	677	Nillson_TopS	677	678	NA	2.06353	-0.422407	-0.316914	0.344865	0.0688654	-0.128663	-0.199042	0.420642	-0.510952	-1.00218	-0.059123	-0.576675	0.826295	0	NA	NA	-2.80321	-1.98428
69	678	Nillson_TopS	678	679	NA	-0.319355	0.239183	0.500127	-0.519377	-0.837953	2.02345	-0.720835	-2.01479	0.974335	2.2477	-1.27362	1.16547	0.421013	0	59184.2	-3792.02	-2.63306	16.7582
90	679	Nillson_TopS	679	680	NA	1.2877	-0.0658016	-0.604275	-0.151513	0.406497	-0.443075	0.18458	0.691042	-0.143591	-0.75081	-0.285937	-0.171823	0.343823	0	NA	NA	0.04133	-8.05116
81	680	Nillson_TopS	680	681	NA	0.780211	0.633272	-0.119663	-0.266461	1.00853	-0.660486	0.385542	-0.249918	0.157092	-0.82906	-0.0917439	-0.474428	0.0357074	0	NA	NA	3.47305	-13.3053
102	681	Nillson_TopS	681	682	NA	-0.878455	-0.361237	1.52931	0.47911	-1.10119	0.965628	-0.897312	-0.00881338	-0.160801	1.71183	-0.908017	0.555282	0.122306	0	NA	NA	-5.64805	12.479
104	682	Nillson_TopS	682	683	NA	-0.430235	-0.209192	0.524479	-0.643126	-1.34475	1.77061	-1.23742	-1.60462	-0.701697	1.86756	3.04752	0.614845	0.285693	0	48267.8	-17856.3	-1.20331	25.4698
87	683	Nillson_TopS	683	684	NA	2.11394	-0.14362	-0.618121	0.346569	0.286558	-0.184024	0.0213003	0.538821	-0.238063	-1.07444	-0.708431	-0.565488	0.853686	0	NA	NA	-2.80321	-1.98428
94	684	Nillson_TopS	684	685	NA	-1.19428	0.478293	0.0615163	-0.913562	0.84266	0.407116	0.0310336	-1.46349	-0.133726	1.05314	2.49098	0.220498	-0.880744	0	NA	NA	11.5245	-18.2658
87	685	Nillson_TopS	685	686	NA	2.34088	-0.485544	-0.561732	0.394738	0.0265198	-0.0398743	-0.366762	1.0921	-0.81355	-0.816212	-0.344463	-0.706994	1.08534	0	-52054.9	-30148.4	-2.80321	-1.98428
90	686	Nillson_TopS	686	687	NA	1.7743	-0.0466883	-0.181268	0.367425	0.533153	-0.275842	-0.206469	0.381588	-0.56706	-0.982229	0.0563397	-0.944827	0.574905	0	NA	NA	0.04133	-8.05116
71	687	Nillson_TopS	687	688	NA	-1.44307	-0.221689	3.77401	-0.216973	-0.390632	-0.833587	-0.109109	-0.509451	1.67335	-0.869847	-0.793725	0.857345	0.543376	0	NA	NA	-7.2091	4.52457
87	688	Nillson_TopS	688	689	NA	1.64928	-0.0579779	-0.588374	-0.00612145	0.499881	-0.213098	-0.0378007	0.477881	-0.469154	-0.727976	-0.286528	-0.491935	0.639993	0	-52772.4	-28237.7	-2.80321	-1.98428
97	689	Nillson_TopS	689	690	NA	-0.844182	-0.632435	0.688268	-0.612184	-1.57397	1.25761	-1.2171	-0.399187	-0.592296	2.1873	2.84169	0.825103	-0.0531632	0	36648.5	-14849.7	-0.640634	29.6106
88	690	Nillson_TopS	690	691	NA	-0.194741	0.35575	0.213888	-0.757942	-1.07897	2.00654	-1.60122	-1.47271	0.485664	1.10756	1.86255	0.16721	0.347578	0	55342.8	-16394.2	-1.47868	23.5644
97	691	Nillson_TopS	691	692	NA	-1.03624	-0.671061	0.920886	-0.650497	-1.34294	1.32849	-0.99179	-0.281891	-0.306952	1.98726	1.94552	0.785978	-0.235481	0	35505.8	-13021.2	-0.640634	29.6106
103	692	Nillson_TopS	692	693	NA	-0.105633	-0.0255705	0.217739	-0.420644	-1.18407	2.36715	-1.14183	-1.96419	-0.282694	2.08364	0.7193	0.774925	0.817827	0	54878.9	-11998.5	-1.77317	21.6487
89	693	Nillson_TopS	693	694	NA	-1.12505	0.68067	-0.150859	1.09986	1.23009	0.365479	0.281081	-2.07733	-0.216862	0.765448	0.971105	0.00399103	-0.793464	0	-2574.27	-23480.8	11.2514	-19.9456
91	694	Nillson_TopS	694	695	NA	-0.476581	-0.870419	0.331368	0.62205	-1.00381	-0.178961	0.64084	-0.221988	0.539273	0.12352	0.330987	0.699817	-0.0752077	0	-4711	22158.9	-3.17219	1.32407
94	695	Nillson_TopS	695	696	NA	-1.09079	0.183862	0.22743	0.293224	0.838255	0.582536	-0.0602147	-2.2784	-0.375389	1.20602	2.55586	0.199802	-0.745414	0	1476.9	-23281.2	11.5245	-18.2658
105	696	Nillson_TopS	696	697	NA	0.373473	-0.999561	0.970937	-0.72559	-1.17078	1.79242	-0.734285	-0.352836	0.242209	-0.135543	-1.54261	0.596203	3.24709	0	14590.6	9574.73	-2.02318	19.8485
87	697	Nillson_TopS	697	698	NA	1.92856	-0.437929	-0.721572	0.486359	0.0417028	-0.15366	-0.199861	0.628722	-0.393452	-0.884491	0.0223481	-0.627982	0.867443	0	NA	NA	-2.80321	-1.98428
90	698	Nillson_TopS	698	699	NA	0.949704	-0.023067	-0.726	0.300301	0.474803	-0.394958	0.244707	0.36798	-0.0249467	-0.824071	0.238768	-0.336381	0.0286994	0	NA	NA	0.04133	-8.05116
94	699	Nillson_TopS	699	700	NA	-0.903203	0.0956033	-0.173809	-0.15468	0.333044	1.0076	-0.288738	-1.39945	-0.687709	1.69867	1.46697	0.433627	-0.597927	0	1360.6	-23916.2	11.5245	-18.2658
90	700	Nillson_TopS	700	701	NA	1.44418	0.0762905	-0.374291	-0.0466992	0.623776	-0.600133	0.261621	0.28097	0.0515029	-0.95797	-0.267735	-0.420332	0.269591	0	NA	NA	0.04133	-8.05116
87	701	Nillson_TopS	701	702	NA	1.712	-0.303737	-0.382993	0.646302	0.129923	-0.171237	-0.0853987	0.450553	-0.335467	-0.950086	-0.283061	-0.686694	0.706488	0	NA	NA	-2.80321	-1.98428
90	702	Nillson_TopS	702	703	NA	1.25337	0.068821	-0.499811	-0.17726	0.557009	-0.354845	0.108094	0.299463	-0.0575398	-0.841521	0.0946236	-0.353064	0.168433	0	NA	NA	0.04133	-8.05116
81	703	Nillson_TopS	703	704	NA	0.464303	0.260419	-0.450259	-0.328857	0.812106	-0.56607	0.496963	0.852412	-0.224664	-0.613026	0.0632256	-0.272321	-0.232736	0	NA	NA	3.47305	-13.3053
101	704	Nillson_TopS	704	705	NA	0.600271	0.134952	-0.419352	-0.104281	0.772648	-0.60189	0.314021	0.270671	0.11811	-0.597171	0.324681	-0.330369	-0.271993	0	NA	NA	1.66122	-10.7159
101	705	Nillson_TopS	705	706	NA	1.30896	0.584633	-0.931697	-0.214406	0.977394	-0.316645	0.316279	0.232573	-0.0780475	-0.555341	-0.361077	-0.57534	0.062922	0	-46292.9	-23801.9	1.66122	-10.7159
89	706	Nillson_TopS	706	707	NA	-1.00686	1.00155	-0.248201	0.90149	1.43607	0.250424	0.454193	-2.4933	-0.188555	0.740736	1.51518	-0.0515498	-0.938313	0	-2078.8	-24671.6	11.2514	-19.9456
89	707	Nillson_TopS	707	708	NA	-0.764682	0.832591	-0.551031	0.439257	1.30264	-0.0396635	0.535748	-1.41326	-0.0655167	0.650987	0.496182	-0.0709427	-0.725062	0	-2838.74	-25423.1	11.2514	-19.9456
89	708	Nillson_TopS	708	709	NA	-1.13549	0.592189	0.118308	0.634996	1.06565	0.240593	0.210424	-1.59286	-0.405046	0.842604	1.21782	-0.0821916	-0.954429	0	-2052.57	-23463.1	11.2514	-19.9456
90	709	Nillson_TopS	709	710	NA	0.924722	0.232402	-0.407221	-0.114964	0.78955	-0.214323	0.17122	0.441468	-0.370603	-0.556162	-0.239718	-0.450114	-0.00854913	0	-46877	-24642.4	0.04133	-8.05116
93	710	Nillson_TopS	710	711	NA	-1.32055	-0.0770304	1.37212	0.964135	-0.948505	-0.126365	0.00237029	1.70274	0.383404	-0.0334786	0.304616	-0.0605167	-1.04544	0	-2313.68	23627.8	-4.40299	4.80104
101	711	Nillson_TopS	711	712	NA	0.884318	0.200966	-0.552833	0.37758	0.680491	-0.578211	0.26646	0.465609	-0.215324	-0.925989	0.160249	-0.297134	-0.171211	0	NA	NA	1.66122	-10.7159
95	712	Nillson_TopS	712	713	NA	-1.14337	-0.1165	1.33651	-0.126611	-0.325213	-0.0406853	-0.141014	1.01949	1.33498	0.378712	-0.834263	-0.0352428	-0.522293	0	12411.4	18348.4	-5.89098	4.66014
89	713	Nillson_TopS	713	714	NA	-1.16905	0.0960084	0.384677	0.918778	0.433861	0.523176	-0.262378	-1.60075	-0.606385	1.09988	1.37945	0.143711	-0.501963	0	-1189.59	-21824.7	11.2514	-19.9456
71	714	Nillson_TopS	714	715	NA	-1.01844	-0.276791	2.87198	-0.197128	-0.429629	-0.638338	-0.341071	0.0486709	1.44077	-0.443441	-0.780906	0.651956	0.171368	0	13914.3	12867.6	-7.2091	4.52457
93	715	Nillson_TopS	715	716	NA	-1.47751	-0.748749	0.729653	1.48074	-0.705099	-0.426594	0.471601	2.33985	0.35328	0.13584	-1.04793	0.457576	-0.258227	0	-3720.49	33109.7	-4.40299	4.80104
98	716	Nillson_TopS	716	717	NA	-1.42834	0.576871	1.57877	2.29834	-0.668877	0.749504	-1.25121	-2.3546	-0.355158	1.31317	2.05898	0.323236	-0.673349	0	24591.4	4202.78	11.8224	-20.6652
77	717	Nillson_TopS	717	718	NA	0.445775	0.802657	-0.537806	-0.404527	1.30685	-0.455577	0.310429	0.154614	-0.245491	-0.359375	0.51887	-0.587004	-0.590048	0	-31385.4	-22211.8	7.51315	-16.4179
81	718	Nillson_TopS	718	719	NA	0.00694153	0.169002	-0.422103	-0.416939	0.625579	-0.493873	0.033642	1.34168	-0.128364	-0.332231	0.826336	-0.334104	-0.540654	0	NA	NA	3.47305	-13.3053
71	719	Nillson_TopS	719	720	NA	-0.851917	-0.142918	2.07298	-0.121812	-0.306205	-0.438604	-0.242755	0.871997	0.917409	-0.0929096	-0.858536	0.0352055	-0.0735168	0	NA	NA	-7.2091	4.52457
90	720	Nillson_TopS	720	721	NA	0.951839	0.451737	-0.404975	0.0354049	0.790623	-0.613476	0.274039	0.254101	0.015679	-0.848314	-0.150904	-0.486914	0.00289964	0	NA	NA	0.04133	-8.05116
81	721	Nillson_TopS	721	722	NA	-0.112393	0.887459	-0.401154	-0.561624	1.44476	-0.642478	0.682793	0.601719	0.141517	-0.567733	-0.146163	-0.353889	-0.542369	0	NA	NA	3.47305	-13.3053
101	722	Nillson_TopS	722	723	NA	0.703111	0.394985	-0.703646	-0.283243	0.863363	-0.597418	0.581528	0.910878	0.00974818	-0.540577	-0.502637	-0.347772	-0.1129	0	-42898.4	-22822.2	1.66122	-10.7159
81	723	Nillson_TopS	723	724	NA	1.06839	0.734199	-1.12678	-0.158362	1.15467	-0.44436	0.441794	0.0687526	-0.121062	-0.535008	-0.0935864	-0.514009	0.0635807	0	NA	NA	3.47305	-13.3053
71	724	Nillson_TopS	724	725	NA	-1.03928	-0.267647	3.55618	-0.15163	-0.289577	-0.611247	-0.0751747	-0.588747	1.43865	-0.917249	-0.799533	0.678557	0.30843	0	13779	10983	-7.2091	4.52457
81	725	Nillson_TopS	725	726	NA	0.587976	0.811386	-0.563893	-0.517453	1.23924	-0.734532	0.515914	0.267752	0.0622494	-0.790889	0.186664	-0.326972	-0.31208	0	NA	NA	3.47305	-13.3053
96	726	Nillson_TopS	726	727	NA	0.302402	0.642461	-0.386792	-0.393322	1.15772	-0.785705	0.690609	0.76563	0.120969	-0.702658	0.128112	-0.413681	-0.685937	0	-37642.7	-21657.4	5.64891	-15.0421
89	727	Nillson_TopS	727	728	NA	-0.920115	0.917326	-0.543541	0.28252	1.38139	0.547316	0.510417	-2.45273	-0.0838077	1.2697	1.01812	0.305626	-0.685721	0	-1632.99	-25899.4	11.2514	-19.9456
90	728	Nillson_TopS	728	729	NA	0.937438	0.160723	-0.376848	-0.344503	0.776358	-0.402489	0.199686	0.55739	0.00379776	-0.475018	-0.352341	-0.266114	-0.182254	0	NA	NA	0.04133	-8.05116
78	729	Nillson_TopS	729	730	NA	1.86158	0.323997	-0.662709	0.222383	0.918201	-0.0486501	0.299966	-0.317465	-0.211915	-0.948283	-0.883253	-0.667087	0.699969	0	-51638.6	-24794.9	-1.47521	-5.09834
95	730	Nillson_TopS	730	731	NA	-0.752645	-0.466049	1.70577	0.0272869	-0.389258	0.0219242	-0.0839108	0.861016	1.22852	0.124664	-0.934254	-0.149494	-0.451825	0	12738.6	17523.9	-5.89098	4.66014
78	731	Nillson_TopS	731	732	NA	1.48215	-0.106292	-0.392475	0.418786	-0.0417812	-0.452619	0.132317	0.647246	-0.342806	-1.05466	-0.0769155	-0.286158	0.437178	0	-51519.3	-28702.1	-1.47521	-5.09834
90	732	Nillson_TopS	732	733	NA	0.653316	0.431125	-0.532827	0.0758925	0.905918	-0.816632	0.477903	0.266749	0.161918	-0.850449	-0.315683	-0.177612	0.0463458	0	-44335.5	-22571.2	0.04133	-8.05116
79	733	Nillson_TopS	733	734	NA	-0.0358342	-0.171273	0.0731458	-0.317552	-1.192	2.36332	-0.326888	-1.75602	-0.122929	2.75944	-1.23571	1.56264	0.431635	0	62120.5	-9532.54	-2.18619	19.1368
102	734	Nillson_TopS	734	735	NA	-1.08147	-0.609002	1.64385	1.03718	-1.02282	0.938237	-0.575199	-0.733059	0.289029	1.482	-0.967034	0.653449	-0.000256692	0	NA	NA	-5.64805	12.479
89	735	Nillson_TopS	735	736	NA	-1.04784	0.767556	-0.388374	0.125684	1.35322	0.197548	0.402006	-1.05741	-0.0240381	0.7124	0.868847	-0.133375	-1.14712	0	-3583.68	-25186.4	11.2514	-19.9456
71	736	Nillson_TopS	736	737	NA	-0.998056	-0.368239	2.68166	-0.260365	-0.626552	-0.428613	-0.274781	0.455719	1.26004	0.0921925	-0.777429	0.318868	-0.108361	0	NA	NA	-7.2091	4.52457
71	737	Nillson_TopS	737	738	NA	-1.03561	-0.29832	3.04635	-0.382812	-0.373454	-0.712283	-0.24659	-0.0329846	1.5951	-0.398181	-0.660596	0.498975	0.0443466	0	13655.4	12831.4	-7.2091	4.52457
81	738	Nillson_TopS	738	739	NA	0.821655	0.37759	-0.532935	-0.35693	0.910806	-0.503146	0.351825	0.531439	-0.0750668	-0.569728	-0.179434	-0.373865	-0.11678	0	NA	NA	3.47305	-13.3053
87	739	Nillson_TopS	739	740	NA	1.66011	-0.0757471	-0.885913	-0.0705501	0.344814	-0.255184	0.198128	-0.0520793	0.214381	-0.663899	-0.34996	-0.279425	0.633521	0	-53090.3	-26428.5	-2.80321	-1.98428
90	740	Nillson_TopS	740	741	NA	0.908831	0.456271	-0.571149	-0.299022	0.924142	-0.43141	0.393362	0.453301	-0.0636145	-0.710968	-0.305013	-0.252583	-0.181701	0	NA	NA	0.04133	-8.05116
76	741	Nillson_TopS	741	742	NA	-1.25645	-0.406254	0.0436003	0.260148	-0.995166	0.153788	0.528727	0.0938001	0.183912	0.66764	0.681749	0.600118	-0.0305378	0	-5420.02	26573.9	-3.9653	1.78471
69	742	Nillson_TopS	742	743	NA	-0.318447	0.619723	1.13056	-0.806905	-0.726272	2.12297	-0.748159	-2.07118	1.26988	1.77491	-1.53491	0.754307	0.525398	0	57301.8	-2435.82	-2.63306	16.7582
90	743	Nillson_TopS	743	744	NA	1.3025	-0.0344523	-0.561695	0.0993837	0.604375	-0.37753	0.205036	0.627519	-0.232011	-0.800554	-0.571297	-0.25452	0.321521	0	NA	NA	0.04133	-8.05116
96	744	Nillson_TopS	744	745	NA	0.463392	0.808485	-0.672304	-0.434637	1.31458	-0.801048	0.72164	0.402786	0.0175978	-0.745534	0.0849275	-0.337183	-0.345338	0	-39623.1	-22135	5.64891	-15.0421
90	745	Nillson_TopS	745	746	NA	1.16747	0.444348	-0.674865	0.401168	0.940033	-0.485339	0.269671	0.40586	-0.269989	-0.98216	-0.305163	-0.49669	-0.0116637	0	NA	NA	0.04133	-8.05116
81	746	Nillson_TopS	746	747	NA	0.671261	0.84231	-0.83459	-0.429088	1.44762	-0.604598	0.517375	0.855888	-0.0790171	-0.789857	-0.00993514	-0.766895	-0.226068	0	-41032.6	-22939.4	3.47305	-13.3053
90	747	Nillson_TopS	747	748	NA	1.23415	0.0348341	-0.539379	-0.120813	0.601542	-0.546842	0.0959917	0.385671	-0.256534	-0.735752	0.0605069	-0.287656	0.36049	0	NA	NA	0.04133	-8.05116
87	748	Nillson_TopS	748	749	NA	1.65161	-0.354163	-0.427084	0.226354	0.16099	-0.393353	-0.118637	0.831954	-0.158007	-0.956198	0.117284	-0.653814	0.507157	0	-51535.1	-29429.9	-2.80321	-1.98428
104	749	Nillson_TopS	749	750	NA	-0.550421	-0.215928	0.780872	-0.797126	-1.44684	1.76916	-1.18618	-1.08784	-0.584773	1.86865	2.18521	0.682208	0.197928	0	48645.7	-17345.9	-1.20331	25.4698
69	750	Nillson_TopS	750	751	NA	-0.167601	0.287395	0.0595424	-0.561451	-0.815245	2.33598	-0.958657	-1.91787	0.617665	2.43081	-1.26219	1.19309	0.693593	0	60210.5	-5354.29	-2.63306	16.7582
91	751	Nillson_TopS	751	752	NA	0.206231	-0.835858	0.114117	1.1996	-0.963918	0.0341324	-0.0461331	-0.987	0.0226888	0.551109	0.604928	0.372662	0.282777	0	-7376.29	16094.8	-3.17219	1.32407
90	752	Nillson_TopS	752	753	NA	1.16566	0.325354	-0.842336	-0.284229	0.772206	-0.518236	0.332511	0.480321	-0.144462	-0.836079	0.125646	-0.325438	0.144076	0	NA	NA	0.04133	-8.05116
74	753	Nillson_TopS	753	754	NA	-0.941211	1.11919	-0.802829	-0.286122	1.54557	0.324662	0.550551	-1.76974	0.0272787	0.890866	1.0842	-0.0575668	-0.708279	0	-1800.71	-26858.4	10.1585	-18.3044
87	754	Nillson_TopS	754	755	NA	1.08846	0.0626503	-0.138508	0.505475	0.618976	-0.672994	0.133407	0.171279	-0.168391	-0.900834	0.0314462	-0.503953	0.0757579	0	-49579.7	-25605.8	-2.80321	-1.98428
94	755	Nillson_TopS	755	756	NA	-0.305298	0.802443	-0.586322	-0.237625	1.3787	0.0648165	0.414689	-0.817846	-0.191848	0.477722	0.452707	-0.286124	-0.763554	0	NA	NA	11.5245	-18.2658
90	756	Nillson_TopS	756	757	NA	1.33956	0.0205788	-0.565226	0.34405	0.449767	-0.450043	0.223933	0.0288785	-0.141911	-0.964144	-0.00325894	-0.29792	0.320653	0	NA	NA	0.04133	-8.05116
103	757	Nillson_TopS	757	758	NA	-0.010949	0.0998013	-0.072579	-0.593401	-1.09157	2.22002	-1.15177	-1.26296	-0.777623	2.43754	0.0533469	1.01623	0.56768	0	57820.9	-11572.1	-1.77317	21.6487
74	758	Nillson_TopS	758	759	NA	-0.896416	0.713283	-0.260155	0.242953	1.13145	0.212746	0.26624	-0.709546	-0.414414	0.606274	0.687883	-0.256272	-0.927726	0	-5224.34	-23966.3	10.1585	-18.3044
90	759	Nillson_TopS	759	760	NA	1.29063	-0.0953365	-0.627948	0.327097	0.401922	-0.425868	-0.106027	0.30294	-0.228121	-0.779095	0.270581	-0.421577	0.392892	0	NA	NA	0.04133	-8.05116
71	760	Nillson_TopS	760	761	NA	-1.20204	0.0597008	2.39355	0.296764	-0.310555	-0.744323	-0.182427	-0.176132	1.54314	-0.311634	-1.03879	0.553353	0.128185	0	NA	NA	-7.2091	4.52457
95	761	Nillson_TopS	761	762	NA	-1.18194	-0.201197	1.09196	-0.155935	-0.398792	-0.131422	0.200079	0.862133	1.58522	0.101807	-1.20531	0.647698	-0.384024	0	12577.7	17664.5	-5.89098	4.66014
81	762	Nillson_TopS	762	763	NA	0.732404	0.327866	-0.481559	-0.369274	0.710686	-0.504029	0.196342	0.720386	-0.102675	-0.460274	-0.0948357	-0.295107	-0.138228	0	NA	NA	3.47305	-13.3053
68	763	Nillson_TopS	763	764	NA	-1.20373	0.110031	1.77714	0.774752	-0.769134	0.120216	-0.637979	-0.148828	0.0825122	1.01364	-0.650293	0.561574	-0.108773	0	30050.1	22460.7	-7.16747	12.5824
95	764	Nillson_TopS	764	765	NA	-1.1288	-0.0110249	1.8002	-0.300099	-0.591229	-0.0772789	-0.218184	0.800189	1.49547	0.30803	-1.2161	0.383973	-0.345777	0	13209.4	17590.3	-5.89098	4.66014
87	765	Nillson_TopS	765	766	NA	1.21788	-0.222464	-0.422278	0.12598	0.291433	-0.484158	0.00516893	0.842318	-0.00170804	-0.897691	-0.0865417	-0.325981	0.277166	0	NA	NA	-2.80321	-1.98428
90	766	Nillson_TopS	766	767	NA	1.00971	0.0422619	-0.253859	-0.329477	0.548903	-0.492127	0.335878	0.0740535	-0.00975334	-0.819383	-0.0455922	-0.040024	0.184421	0	NA	NA	0.04133	-8.05116
89	767	Nillson_TopS	767	768	NA	-1.1275	0.54431	-0.42125	0.538243	0.93483	0.502565	0.180073	-1.36221	-0.453478	1.02531	1.21016	0.0340799	-0.903485	0	-1553.76	-23851	11.2514	-19.9456
90	768	Nillson_TopS	768	769	NA	1.53057	-0.00892367	-0.372276	0.419729	0.467868	-0.239166	-0.0520124	0.363513	-0.247369	-1.11656	-0.228927	-0.613928	0.482746	0	NA	NA	0.04133	-8.05116
94	769	Nillson_TopS	769	770	NA	-1.11431	0.769909	0.0396681	-0.695985	1.20768	0.450724	0.205626	-2.21045	-0.255734	0.973394	2.57849	0.136775	-0.729646	0	NA	NA	11.5245	-18.2658
93	770	Nillson_TopS	770	771	NA	-1.44095	-0.477515	1.01143	0.924541	-0.90636	-0.0739881	0.561236	1.45913	0.549415	0.407659	-1.19537	0.561493	-0.35011	0	-3826.17	33568.1	-4.40299	4.80104
102	771	Nillson_TopS	771	772	NA	-1.03383	-0.652274	2.09143	0.812882	-1.13351	0.760132	-0.53601	-0.816333	0.831521	1.22183	-1.04362	0.720802	-0.0166692	0	26672.1	16080.7	-5.64805	12.479
91	772	Nillson_TopS	772	773	NA	0.512601	-0.725418	0.0912317	0.626609	-1.23457	-0.204873	0.331543	0.040564	0.172388	0.148786	0.119112	0.499243	0.039453	0	-7826.68	16256.6	-3.17219	1.32407
81	773	Nillson_TopS	773	774	NA	0.332799	0.359361	-0.588445	-0.417054	0.857156	-0.613349	0.282972	0.82377	-0.0929368	-0.343703	0.491915	-0.300128	-0.492064	0	-37220.2	-22380.4	3.47305	-13.3053
90	774	Nillson_TopS	774	775	NA	1.20096	-0.0293757	-0.425026	0.0142573	0.47328	-0.481532	0.278752	0.295495	-0.138919	-0.95168	-0.00125379	-0.325079	0.362661	0	NA	NA	0.04133	-8.05116
94	775	Nillson_TopS	775	776	NA	-1.17856	0.369148	0.272646	-0.0903265	0.728561	0.553855	-0.174628	-1.87067	-0.563594	1.12999	2.53794	0.272485	-0.80157	0	NA	NA	11.5245	-18.2658
89	776	Nillson_TopS	776	777	NA	-0.863843	0.208161	-0.0929699	0.793144	0.514578	0.148047	-0.167147	-0.453186	-0.546634	0.668829	1.53127	-0.305507	-0.992949	0	-4459.72	-21121.7	11.2514	-19.9456
87	777	Nillson_TopS	777	778	NA	1.98723	-0.466298	-0.643662	0.204945	0.0108901	-0.0615254	-0.0807002	0.340636	-0.399306	-0.918009	0.125272	-0.367073	0.753019	0	NA	NA	-2.80321	-1.98428
90	778	Nillson_TopS	778	779	NA	0.954527	0.663752	-0.444876	0.255734	1.10315	-0.612784	0.448714	-0.201377	-0.0528718	-0.896203	-0.368893	-0.631938	0.166146	0	-46122.3	-22771.4	0.04133	-8.05116
81	779	Nillson_TopS	779	780	NA	0.486363	1.02649	-0.285842	-0.175301	1.28243	-0.557941	0.378761	-0.231808	0.0428828	-0.67961	-0.0605832	-0.626982	-0.28883	0	-39953.2	-21618.5	3.47305	-13.3053
87	780	Nillson_TopS	780	781	NA	1.70158	-0.0884928	-0.419642	0.0629221	0.240329	-0.159884	-0.0299477	0.796415	-0.274533	-0.746554	-0.527418	-0.721193	0.593263	0	-52453.4	-28665.9	-2.80321	-1.98428
69	781	Nillson_TopS	781	782	NA	-0.0745548	0.469039	0.35555	-0.602023	-0.679292	2.24291	-0.882963	-1.88912	1.13954	2.00714	-1.49707	0.760424	0.469949	0	59580.1	-3366.63	-2.63306	16.7582
90	782	Nillson_TopS	782	783	NA	0.901742	0.485359	-0.496935	0.315773	1.02456	-0.656761	0.327242	0.683158	-0.292986	-0.674339	-0.647879	-0.721383	0.168915	0	NA	NA	0.04133	-8.05116
71	783	Nillson_TopS	783	784	NA	-1.19832	-0.362437	2.71489	-0.171754	-0.266939	-0.658731	0.317661	-0.103066	1.32675	-0.475126	-0.868159	0.608082	0.199076	0	13836.7	12925.3	-7.2091	4.52457
90	784	Nillson_TopS	784	785	NA	1.51328	-0.00204119	-0.421476	0.472145	0.479899	-0.497381	-0.0554214	0.0542074	-0.197184	-0.961424	-0.0558441	-0.508544	0.554655	0	NA	NA	0.04133	-8.05116
71	785	Nillson_TopS	785	786	NA	-1.32157	-0.257522	2.23866	-0.364354	-0.443073	-0.335299	-0.205268	0.862331	1.5533	-0.00816726	-1.03851	0.455584	-0.0929602	0	NA	NA	-7.2091	4.52457
81	786	Nillson_TopS	786	787	NA	0.613049	0.74727	-0.833181	-0.485935	1.42413	-0.627779	0.630437	0.425704	0.0333432	-0.69825	-0.0333243	-0.458526	-0.231398	0	-40770.1	-22399.7	3.47305	-13.3053
90	787	Nillson_TopS	787	788	NA	1.0848	0.188269	-0.483312	-0.0283906	0.701024	-0.532168	0.30696	-0.0181452	-0.00301598	-0.746323	-0.0258503	-0.240977	0.038055	0	NA	NA	0.04133	-8.05116
94	788	Nillson_TopS	788	789	NA	-0.712849	0.502256	-0.400303	-0.474598	0.944688	0.178352	0.0218229	-0.470062	-0.392532	0.771957	1.37556	-0.139229	-0.79783	0	-3886.63	-23141	11.5245	-18.2658
90	789	Nillson_TopS	789	790	NA	1.2147	0.124716	-0.478569	-0.266375	0.640406	-0.384086	0.196214	0.622943	-0.0615555	-0.822991	-0.178219	-0.446338	0.136435	0	-48240.3	-25789.7	0.04133	-8.05116
68	790	Nillson_TopS	790	791	NA	-0.943184	0.240996	1.67969	0.866486	-0.659027	0.389082	-1.09652	0.0191929	-0.171647	0.83681	-0.479105	0.228715	-0.0394531	0	30696.3	22991.7	-7.16747	12.5824
81	791	Nillson_TopS	791	792	NA	0.842659	0.752436	-0.76845	-0.240284	1.20817	-0.57899	0.58857	0.342915	0.0328476	-0.7587	-0.381555	-0.503501	-0.0749759	0	NA	NA	3.47305	-13.3053
87	792	Nillson_TopS	792	793	NA	1.82861	-0.319013	-0.535948	0.134189	0.205241	-0.242093	-0.0551658	0.400316	-0.212342	-0.945524	-0.17114	-0.515046	0.87735	0	NA	NA	-2.80321	-1.98428
68	793	Nillson_TopS	793	794	NA	-0.943654	0.125699	1.82973	0.929591	-0.938571	0.572581	-0.922355	0.162952	-0.48359	1.03514	-0.694027	0.433871	-0.0759695	0	30431.2	22962.4	-7.16747	12.5824
101	794	Nillson_TopS	794	795	NA	0.788096	0.256812	-0.733657	-0.448973	0.613682	-0.590007	0.492552	0.0266342	0.285622	-0.63835	0.250796	-0.075821	0.0646447	0	-43697.3	-24020.6	1.66122	-10.7159
81	795	Nillson_TopS	795	796	NA	0.311643	0.553594	0.0671519	-0.279819	0.904608	-0.631189	0.224413	0.100314	0.22587	-0.700025	0.0940119	-0.390168	-0.283813	0	-40006.5	-21604.3	3.47305	-13.3053
87	796	Nillson_TopS	796	797	NA	1.504	-0.349063	-0.517383	0.384248	-0.0483815	-0.1334	-0.172801	0.64689	-0.488847	-0.803989	0.332234	-0.539494	0.580803	0	NA	NA	-2.80321	-1.98428
90	797	Nillson_TopS	797	798	NA	0.994597	0.571215	-0.0898989	0.428312	1.03187	-0.602837	0.320788	0.0112321	-0.188419	-0.792732	-0.372498	-0.772079	-0.185396	0	NA	NA	0.04133	-8.05116
87	798	Nillson_TopS	798	799	NA	1.90576	-0.176946	-0.575336	0.21882	0.305987	-0.0582237	-0.0759117	0.316055	-0.472384	-1.07921	-0.183967	-0.447818	0.795065	0	-53476	-29107.1	-2.80321	-1.98428
101	799	Nillson_TopS	799	800	NA	0.932128	0.161752	-0.430448	-0.296045	0.546652	-0.424749	0.29799	0.19967	-0.102218	-0.674519	0.0148694	-0.129572	0.0960908	0	NA	NA	1.66122	-10.7159
76	800	Nillson_TopS	800	801	NA	-1.16253	-0.678085	0.165566	0.750376	-0.960942	0.0824515	0.37895	-0.227414	0.180896	0.515414	0.772086	0.60737	0.119	0	NA	NA	-3.9653	1.78471
81	801	Nillson_TopS	801	802	NA	0.634543	0.867592	-0.545401	-0.313414	1.22873	-0.638563	0.572787	-0.146373	0.11861	-0.723935	-0.243436	-0.298788	-0.154228	0	NA	NA	3.47305	-13.3053
90	802	Nillson_TopS	802	803	NA	1.02901	0.219018	-0.526778	-0.080042	0.673499	-0.466461	0.307825	0.348584	-0.302784	-0.742009	-0.0226257	-0.337317	0.149675	0	NA	NA	0.04133	-8.05116
78	803	Nillson_TopS	803	804	NA	1.28446	-0.299024	-0.304689	0.0515543	0.148344	-0.308934	0.124391	0.0101026	-0.0077072	-0.608768	-0.377207	-0.0127894	0.506219	0	-53643	-27292.2	-1.47521	-5.09834
81	804	Nillson_TopS	804	805	NA	0.600541	0.645241	-0.816284	-0.0544852	1.23246	-0.686974	0.540017	0.211341	0.134158	-0.79024	-0.21278	-0.266897	-0.126378	0	NA	NA	3.47305	-13.3053
101	805	Nillson_TopS	805	806	NA	0.764292	0.61222	-0.481034	0.239635	0.997778	-0.620863	0.464822	0.222603	0.0678	-1.06524	-0.433311	-0.304039	-0.10593	0	NA	NA	1.66122	-10.7159
71	806	Nillson_TopS	806	807	NA	-1.31716	-0.126261	2.17192	-0.0910473	-0.306425	-0.526047	-0.073197	0.83948	1.61229	-0.274275	-1.07077	0.379833	-0.227534	0	12737.5	15789.2	-7.2091	4.52457
104	807	Nillson_TopS	807	808	NA	-0.419091	-0.279993	0.321902	-0.528358	-1.30493	1.94289	-1.2208	-2.02782	-0.714557	2.40371	2.75093	1.09207	0.463972	0	47151.8	-15467.5	-1.20331	25.4698
90	808	Nillson_TopS	808	809	NA	0.901577	0.267059	-0.637496	-0.377729	0.707035	-0.430099	0.379852	0.471753	-0.0330241	-0.542358	-0.147894	-0.284938	-0.0152661	0	NA	NA	0.04133	-8.05116
90	809	Nillson_TopS	809	810	NA	1.48032	0.135245	-0.644977	0.0967419	0.51731	-0.353123	0.118847	0.209266	-0.28239	-0.864183	-0.0758829	-0.400097	0.393769	0	NA	NA	0.04133	-8.05116
81	810	Nillson_TopS	810	811	NA	0.867341	0.22022	-0.340614	-0.47951	0.835123	-0.515988	0.440541	0.605444	0.0690861	-0.711472	-0.460991	-0.231291	0.000571941	0	NA	NA	3.47305	-13.3053
89	811	Nillson_TopS	811	812	NA	-1.2817	0.312617	0.281164	1.22386	0.770086	0.459689	0.00122332	-1.85148	-0.460421	1.02832	1.63549	-0.0129518	-1.02547	0	-1872.23	-21841.2	11.2514	-19.9456
90	812	Nillson_TopS	812	813	NA	1.20082	0.256949	-0.75175	-0.275506	0.646219	-0.439773	0.269285	0.789662	-0.0299265	-0.831082	-0.37617	-0.377876	0.315558	0	-48606.2	-25323.8	0.04133	-8.05116
104	813	Nillson_TopS	813	814	NA	-0.236763	-0.349975	0.0488741	-0.563794	-1.21716	2.0615	-1.20199	-1.89258	-0.767299	2.56568	2.01414	1.23351	0.466107	0	49201.4	-14422.5	-1.20331	25.4698
93	814	Nillson_TopS	814	815	NA	-1.1988	-0.257775	1.16632	0.264627	-0.797516	0.0604126	0.294009	0.87823	0.266853	0.0969996	-0.316636	0.33311	-0.162608	0	-4586.19	29359.2	-4.40299	4.80104
87	815	Nillson_TopS	815	816	NA	1.60355	-0.243783	-0.708342	0.0901742	0.235231	-0.224401	-0.0508391	0.601065	-0.167301	-0.876622	0.115311	-0.659265	0.707778	0	-52026.3	-29258.9	-2.80321	-1.98428
87	816	Nillson_TopS	816	817	NA	1.8324	-0.153668	-0.689862	0.196789	0.0782472	-0.251542	0.108582	0.443735	-0.243291	-0.875012	-0.526922	-0.204419	0.721894	0	NA	NA	-2.80321	-1.98428
100	817	Nillson_TopS	817	818	NA	-0.905944	-0.570111	0.35196	-0.442049	-1.27185	1.0797	-1.01133	0.22348	-0.681324	1.80765	2.03815	0.757745	-0.0958185	0	33479.8	-14050.6	-0.457409	31.025
87	818	Nillson_TopS	818	819	NA	1.48837	-0.153789	-0.37468	-0.134115	0.408708	-0.163817	0.0070484	-0.0330009	-0.32195	-0.786275	0.244768	-0.395059	0.502316	0	NA	NA	-2.80321	-1.98428
87	819	Nillson_TopS	819	820	NA	1.96334	-0.362343	-0.472031	0.30866	0.00129345	-0.04687	-0.0441621	-0.0535892	-0.0861658	-0.912113	-0.116496	-0.609293	0.858929	0	NA	NA	-2.80321	-1.98428
90	820	Nillson_TopS	820	821	NA	1.11738	0.141068	-0.44038	-0.312375	0.668012	-0.479864	0.301943	0.486987	-0.290661	-0.748338	-0.0894002	-0.418821	0.354112	0	NA	NA	0.04133	-8.05116
105	821	Nillson_TopS	821	822	NA	0.188726	-0.749202	1.06784	-0.105137	-1.03784	1.67541	-0.860313	-1.16228	-0.257675	1.07976	-1.7161	0.716598	2.72709	0	19503.7	10850.3	-2.02318	19.8485
91	822	Nillson_TopS	822	823	NA	1.03414	-0.855054	-0.167753	0.61303	-1.13896	-0.146729	0.277518	-0.497559	0.283205	0.0624229	0.357566	0.273284	0.390226	0	-8762.96	13431.6	-3.17219	1.32407
94	823	Nillson_TopS	823	824	NA	-0.99823	0.75804	0.115939	-0.738509	1.23524	0.34282	0.361184	-2.11506	-0.0779996	0.919627	2.30697	-0.0635531	-0.738229	0	NA	NA	11.5245	-18.2658
74	824	Nillson_TopS	824	825	NA	-1.05975	0.557679	-0.172867	-0.454287	1.05511	0.474396	0.173283	-1.34234	-0.478307	1.01456	1.65067	0.189535	-0.855202	0	164.699	-25212.3	10.1585	-18.3044
78	825	Nillson_TopS	825	826	NA	0.975331	-0.0856334	-0.711999	-0.395596	0.417061	-0.343992	0.0889622	0.224959	0.0431441	-0.404521	0.280464	-0.0807531	0.206044	0	-47477.4	-26850.8	-1.47521	-5.09834
81	826	Nillson_TopS	826	827	NA	0.741302	0.403429	-0.472017	-0.493299	0.835819	-0.730592	0.333762	0.550762	-0.114186	-0.590289	0.372856	-0.228043	-0.277311	0	NA	NA	3.47305	-13.3053
81	827	Nillson_TopS	827	828	NA	0.30839	0.307898	-0.33083	0.0688921	0.811464	-0.748785	0.286388	0.433859	0.0497701	-0.722084	0.085512	-0.114478	-0.230863	0	-40330.2	-22465.4	3.47305	-13.3053
90	828	Nillson_TopS	828	829	NA	0.719652	0.0699171	-0.655356	0.270078	0.61795	-0.714426	0.421791	1.23373	-0.119927	-0.874244	-0.340981	-0.0947512	-0.140968	0	NA	NA	0.04133	-8.05116
88	829	Nillson_TopS	829	830	NA	-0.4416	0.266637	0.23171	-0.854262	-1.24201	1.99879	-1.4192	-0.912472	0.202769	1.32022	1.70274	0.172062	0.208113	0	55567.2	-16537.8	-1.47868	23.5644
90	830	Nillson_TopS	830	831	NA	1.341	0.3617	-0.384198	-0.120503	0.787999	-0.442251	0.136236	0.679523	-0.291701	-0.965925	-0.47707	-0.60005	0.39096	0	NA	NA	0.04133	-8.05116
80	831	Nillson_TopS	831	832	NA	-1.30952	-0.484407	0.592359	0.660514	-0.919246	0.194157	0.454804	0.0803321	0.461965	0.871652	-0.808749	0.709646	0.224643	0	NA	NA	-4.13488	11.909
90	832	Nillson_TopS	832	833	NA	1.21283	-0.0344187	-0.465021	0.115952	0.475786	-0.43442	-0.0105455	0.840528	-0.247961	-0.829582	0.23959	-0.650242	0.111877	0	NA	NA	0.04133	-8.05116
90	833	Nillson_TopS	833	834	NA	1.03126	0.283247	-0.767719	-0.206334	0.781701	-0.629007	0.45728	0.729327	0.143466	-0.846366	-0.415041	-0.428331	0.285372	0	NA	NA	0.04133	-8.05116
90	834	Nillson_TopS	834	835	NA	1.37531	-0.0453183	-0.733127	-0.182322	0.210873	-0.300173	0.203508	0.423456	-0.19764	-0.73864	0.156364	-0.182114	0.317868	0	NA	NA	0.04133	-8.05116
97	835	Nillson_TopS	835	836	NA	-0.846872	-0.584488	0.78176	-0.490331	-1.20441	1.49507	-1.12702	0.00160219	-0.880459	2.25213	0.877815	0.799585	0.285593	0	40954.2	-12238.4	-0.640634	29.6106
87	836	Nillson_TopS	836	837	NA	1.62355	-0.228732	-0.808379	-0.033962	0.425063	-0.219991	-0.00765833	0.541085	-0.068825	-0.882756	0.00899554	-0.475905	0.559118	0	NA	NA	-2.80321	-1.98428
87	837	Nillson_TopS	837	838	NA	1.27779	-0.179535	-0.754623	-0.273786	0.316548	-0.421576	0.0948128	0.742278	-0.354455	-0.469416	0.403522	-0.332685	0.287779	0	NA	NA	-2.80321	-1.98428
95	838	Nillson_TopS	838	839	NA	-1.09888	0.141681	1.43126	-0.0908612	-0.299669	-0.261828	-0.171077	1.10609	1.77229	0.15924	-0.978642	-0.159702	-0.632442	0	12153.4	17773.6	-5.89098	4.66014
87	839	Nillson_TopS	839	840	NA	1.36708	-0.145183	-0.145054	-0.118633	0.445539	-0.32042	0.0885033	0.208277	-0.279612	-0.739672	0.253815	-0.610534	0.264973	0	NA	NA	-2.80321	-1.98428
90	840	Nillson_TopS	840	841	NA	1.01057	0.182325	-0.468514	-0.0456121	0.562823	-0.450907	0.24623	0.501414	0.0643391	-0.818901	-0.350371	-0.353772	0.168311	0	NA	NA	0.04133	-8.05116
101	841	Nillson_TopS	841	842	NA	1.12516	0.486416	-0.61326	-0.216316	0.962289	-0.563501	0.551862	0.158654	0.176902	-0.91439	-0.476374	-0.39207	0.129358	0	NA	NA	1.66122	-10.7159
90	842	Nillson_TopS	842	843	NA	1.1244	0.404378	-0.555175	-0.0883298	0.818639	-0.45172	0.32035	0.187055	0.19889	-0.936767	-0.554652	-0.134389	0.0184994	0	NA	NA	0.04133	-8.05116
101	843	Nillson_TopS	843	844	NA	1.03502	0.61859	-0.873103	0.282701	1.0862	-0.54131	0.491289	0.141764	-0.0631882	-0.901806	-0.260155	-0.561278	0.0112767	0	NA	NA	1.66122	-10.7159
94	844	Nillson_TopS	844	845	NA	-1.01387	0.499412	-0.471025	-0.4829	1.03444	0.542407	0.179717	-1.44881	-0.389066	1.14251	1.46544	0.165472	-0.478661	0	688.77	-25415.8	11.5245	-18.2658
90	845	Nillson_TopS	845	846	NA	1.24127	0.314117	-0.680356	-0.0122498	0.765424	-0.322796	0.0989845	0.684461	-0.31563	-0.835413	-0.22945	-0.57403	0.223013	0	NA	NA	0.04133	-8.05116
101	846	Nillson_TopS	846	847	NA	1.21058	0.547308	-0.871216	-0.0890366	1.15845	-0.380805	0.336892	0.312688	-0.176848	-0.836823	-0.255138	-0.649845	0.152553	0	NA	NA	1.66122	-10.7159
104	847	Nillson_TopS	847	848	NA	-0.200076	0.25702	0.214017	-0.816468	-1.29335	2.28048	-1.19203	-2.20275	-0.701238	2.14272	2.53224	0.986597	0.480329	0	49075.7	-15537.8	-1.20331	25.4698
101	848	Nillson_TopS	848	849	NA	0.914498	0.652129	-0.922688	-0.247575	1.14644	-0.614811	0.421083	0.281621	-0.138712	-0.68927	0.197774	-0.516806	-0.017837	0	NA	NA	1.66122	-10.7159
87	849	Nillson_TopS	849	850	NA	0.996385	-0.0422353	-0.620007	-0.0298445	0.30162	-0.411698	0.105921	0.552623	-0.0920063	-0.731455	0.281787	-0.257082	0.171342	0	NA	NA	-2.80321	-1.98428
94	850	Nillson_TopS	850	851	NA	-0.9601	1.06251	-0.66876	-0.544902	1.39029	0.469526	0.519583	-1.97354	0.0471619	1.03388	1.38191	0.16967	-0.830214	0	-894.943	-26801.6	11.5245	-18.2658
90	851	Nillson_TopS	851	852	NA	1.30981	0.18454	-0.862476	0.0722661	0.595076	-0.5551	0.341976	0.37194	-0.0769698	-0.987827	-0.220278	-0.190154	0.419301	0	NA	NA	0.04133	-8.05116
101	852	Nillson_TopS	852	853	NA	0.614226	0.310389	-0.569212	-0.312928	0.964702	-0.627532	0.603097	0.778934	-0.0377211	-0.650195	-0.342673	-0.263789	-0.134936	0	NA	NA	1.66122	-10.7159
71	853	Nillson_TopS	853	854	NA	-1.23194	-0.437962	3.82031	-0.0148218	-0.437512	-0.749411	-0.305206	-0.718615	1.41009	-0.422423	-0.00899478	0.449775	-0.149138	0	14374	10346.7	-7.2091	4.52457
71	854	Nillson_TopS	854	855	NA	-0.909589	0.341544	1.31542	0.207304	0.0603452	-0.321482	-0.109397	-0.305252	0.553218	-0.109153	0.211472	0.105609	-0.56947	0	7893.86	-2864.35	-7.2091	4.52457
95	855	Nillson_TopS	855	856	NA	-1.05709	-0.240058	1.85332	-0.103522	-0.192939	-0.255374	-0.136648	1.23531	1.02555	0.25206	-0.756948	0.054374	-0.854123	0	11754.8	17654.4	-5.89098	4.66014
90	856	Nillson_TopS	856	857	NA	1.09303	0.109557	-0.326854	0.0422	0.564819	-0.476812	0.256193	0.333656	-0.0739414	-0.872089	-0.0163978	-0.428664	0.0464321	0	-48931.1	-25549.4	0.04133	-8.05116
94	857	Nillson_TopS	857	858	NA	-0.934921	0.39891	0.257412	-0.675312	0.852686	0.592184	0.0184434	-2.07	-0.334083	1.18093	2.76305	0.122094	-0.799512	0	NA	NA	11.5245	-18.2658
87	858	Nillson_TopS	858	859	NA	2.11638	-0.45262	-0.466494	0.610756	0.0335619	0.0356766	-0.166305	0.13159	-0.365991	-0.96035	-0.478963	-0.451648	0.958421	0	-53310.4	-29730.8	-2.80321	-1.98428
101	859	Nillson_TopS	859	860	NA	0.892461	0.334339	-0.42727	0.0120023	0.677223	-0.710117	0.370127	0.583904	0.00964854	-0.819566	-0.213409	-0.456078	0.0508481	0	NA	NA	1.66122	-10.7159
81	860	Nillson_TopS	860	861	NA	0.762175	0.478703	-0.541381	-0.14805	1.0292	-0.559936	0.461636	0.00619961	0.0537188	-0.709327	-0.230128	-0.162579	-0.153787	0	-43853.3	-22650.7	3.47305	-13.3053
87	861	Nillson_TopS	861	862	NA	1.32367	-0.15781	-0.660541	0.0444451	0.265257	-0.236423	0.206364	0.286443	-0.229796	-0.826068	0.136719	-0.216818	0.345533	0	-52293.2	-28060.8	-2.80321	-1.98428
69	862	Nillson_TopS	862	863	NA	-0.255897	0.446891	0.496709	-0.687605	-0.558515	2.08347	-0.57291	-2.06404	1.43992	1.98513	-1.50999	0.958505	0.353784	0	58845.2	-2558.26	-2.63306	16.7582
71	863	Nillson_TopS	863	864	NA	-1.28209	0.106945	1.01333	0.404617	-0.256927	-0.43764	-0.0077238	0.215054	1.56234	-0.214171	-0.680161	0.424873	-0.111358	0	NA	NA	-7.2091	4.52457
90	864	Nillson_TopS	864	865	NA	1.51089	-0.31635	-0.29658	-0.0418402	0.273923	-0.461863	-0.060362	0.450713	-0.2735	-0.865992	0.595361	-0.52794	0.379198	0	NA	NA	0.04133	-8.05116
94	865	Nillson_TopS	865	866	NA	-1.029	0.739779	0.052641	-0.782054	1.33036	0.453626	0.376842	-2.41208	-0.0176322	1.04462	2.44141	0.154849	-0.681443	0	3058.44	-25666.1	11.5245	-18.2658
90	866	Nillson_TopS	866	867	NA	1.79969	0.252975	-0.601307	0.275935	0.688962	-0.230699	0.0535726	0.480937	-0.514832	-0.942801	-0.383808	-1.07268	0.791454	0	NA	NA	0.04133	-8.05116
74	867	Nillson_TopS	867	868	NA	-0.938594	0.605876	-0.105417	0.39043	1.06228	0.0196023	0.179688	-0.44966	-0.284886	0.528753	0.689579	-0.359458	-0.964959	0	-5777.69	-23560.8	10.1585	-18.3044
90	868	Nillson_TopS	868	869	NA	1.12422	0.0588603	-0.347438	-0.129499	0.582215	-0.528401	0.261173	0.680723	-0.0494483	-0.95215	-0.420731	-0.234818	0.26208	0	NA	NA	0.04133	-8.05116
71	869	Nillson_TopS	869	870	NA	-1.08479	-0.338894	3.13055	-0.294257	-0.325601	-0.7452	-0.128042	-0.235596	1.55486	-0.672784	-0.717949	0.561481	0.440455	0	14163.8	11883.9	-7.2091	4.52457
87	870	Nillson_TopS	870	871	NA	1.48357	-0.200177	-0.46132	0.148851	0.305649	-0.332153	-0.0265279	0.462044	-0.342329	-0.718556	0.139338	-0.555476	0.414839	0	-51928.6	-29392.8	-2.80321	-1.98428
86	871	Nillson_TopS	871	872	NA	-1.06091	-0.481992	0.231224	0.395047	-1.06974	0.316542	0.255534	0.443254	0.165053	0.843054	-0.58535	0.613258	0.466775	0	281.452	37149.6	-4.2936	8.20126
93	872	Nillson_TopS	872	873	NA	-1.31117	-0.742452	0.428845	0.381842	-0.676887	0.109352	0.50334	1.6362	0.341641	0.487796	-1.01047	0.557457	0.153853	0	-4304.47	32887.2	-4.40299	4.80104
81	873	Nillson_TopS	873	874	NA	0.342294	0.652209	-0.674846	-0.514064	1.21052	-0.700697	0.668608	0.367856	0.188314	-0.573873	-0.187911	-0.233489	-0.166185	0	NA	NA	3.47305	-13.3053
78	874	Nillson_TopS	874	875	NA	1.49999	0.190136	-0.7504	-0.0186729	0.702552	-0.272476	0.300971	-0.0223817	-0.09446	-0.921513	-0.484754	-0.226287	0.492217	0	-52000.6	-25308.5	-1.47521	-5.09834
69	875	Nillson_TopS	875	876	NA	-0.439125	0.343551	0.154012	-0.640718	-0.681078	1.99695	-0.804519	-1.43648	1.14589	2.10836	-1.37501	0.893511	0.159629	0	59270.6	-3446.02	-2.63306	16.7582
74	876	Nillson_TopS	876	877	NA	-0.922029	0.722291	-0.339226	-0.317694	1.17534	0.535472	0.372909	-1.71217	-0.202748	1.16599	0.877414	0.0867917	-0.680357	0	-821.008	-26669.8	10.1585	-18.3044
90	877	Nillson_TopS	877	878	NA	1.42488	0.176732	-0.37394	0.0678532	0.644657	-0.314643	0.142389	0.280114	-0.299489	-1.0426	0.0508579	-0.776874	0.390817	0	-50939.8	-27338.2	0.04133	-8.05116
81	878	Nillson_TopS	878	879	NA	0.717848	0.525294	-0.685701	-0.332617	1.17781	-0.723383	0.500904	0.191492	0.00457977	-0.59605	0.0313561	-0.350111	-0.101396	0	-42166.5	-23107.5	3.47305	-13.3053
87	879	Nillson_TopS	879	880	NA	1.77788	-0.205155	-0.423618	0.754792	0.0571884	-0.168107	-0.22121	0.367802	-0.266143	-1.06515	-0.118504	-0.62325	0.599066	0	NA	NA	-2.80321	-1.98428
90	880	Nillson_TopS	880	881	NA	2.02201	-0.144677	-0.426314	0.549929	0.397089	0.030746	-0.156013	0.193349	-0.674581	-1.08949	-0.387652	-0.542323	0.792168	0	NA	NA	0.04133	-8.05116
98	881	Nillson_TopS	881	882	NA	-1.24361	0.672983	1.13279	2.37259	-0.551314	0.779495	-1.13577	-1.95832	-0.514319	1.36368	0.899221	0.236606	-0.453602	0	25031.7	5897.68	11.8224	-20.6652
87	882	Nillson_TopS	882	883	NA	1.63396	-0.428824	-0.579607	0.42282	-0.0638297	-0.413235	-0.01633	0.447893	-0.0577451	-0.916771	0.0364698	-0.249954	0.570564	0	-52808.8	-29599.7	-2.80321	-1.98428
90	883	Nillson_TopS	883	884	NA	1.23619	0.195876	-0.753825	-0.101433	0.802513	-0.453254	0.283633	0.474639	-0.145381	-0.791362	-0.269859	-0.370018	0.244513	0	NA	NA	0.04133	-8.05116
81	884	Nillson_TopS	884	885	NA	0.871739	0.717661	-0.911985	-0.290113	1.37593	-0.417987	0.541735	-0.129768	0.238003	-0.691778	-0.557758	-0.336128	0.0653949	0	NA	NA	3.47305	-13.3053
96	885	Nillson_TopS	885	886	NA	-0.137322	0.571794	-0.432113	-0.563315	0.991658	-0.693623	0.523552	0.471119	0.260216	-0.484752	0.316712	-0.07381	-0.439391	0	-35833.3	-20754.3	5.64891	-15.0421
95	886	Nillson_TopS	886	887	NA	-1.34896	0.267216	1.54388	-0.416453	-0.172412	-0.265802	-0.315817	0.852868	1.89675	0.192242	-0.761768	0.06507	-0.65432	0	12584.7	17465.7	-5.89098	4.66014
74	887	Nillson_TopS	887	888	NA	-0.740796	0.526153	-0.426191	0.00959441	1.08068	0.259784	0.297771	-1.06912	-0.397189	0.759821	1.61847	-0.0678408	-1.19003	0	-2270.21	-24487.9	10.1585	-18.3044
87	888	Nillson_TopS	888	889	NA	1.42142	-0.269056	-0.175288	0.0432348	0.239314	-0.127537	-0.321763	0.485891	-0.472568	-0.621613	0.272555	-0.533679	0.335913	0	NA	NA	-2.80321	-1.98428
90	889	Nillson_TopS	889	890	NA	1.11605	0.16097	-1.01625	-0.193525	0.609007	-0.514431	0.322522	0.772821	-0.0147182	-0.827526	0.0540606	-0.255125	0.20629	0	NA	NA	0.04133	-8.05116
96	890	Nillson_TopS	890	891	NA	0.137484	0.86372	-0.618395	-0.484599	1.31675	-0.555184	0.610267	0.457705	0.102622	-0.558456	-0.214588	-0.238624	-0.446089	0	-38084.8	-20866.1	5.64891	-15.0421
90	891	Nillson_TopS	891	892	NA	0.88419	0.0339565	-0.126114	0.523703	0.69159	-0.570919	0.269029	0.421997	0.0796928	-0.96184	-0.790835	-0.127923	-0.00876555	0	NA	NA	0.04133	-8.05116
101	892	Nillson_TopS	892	893	NA	1.07298	0.559503	-0.632686	0.0438535	0.8988	-0.591286	0.380653	0.355136	-0.0429152	-0.980617	-0.0924342	-0.559986	-0.0285841	0	-45863.2	-24004.3	1.66122	-10.7159
95	893	Nillson_TopS	893	894	NA	-1.16481	-0.174688	1.16237	-0.0411854	-0.26482	-0.101871	-0.139507	1.57395	1.08733	0.324204	-0.80679	-0.16851	-0.570248	0	10206.2	17889.5	-5.89098	4.66014
90	894	Nillson_TopS	894	895	NA	1.73836	0.0431206	-0.225839	0.303111	0.490642	-0.196877	-0.0897115	0.559365	-0.607674	-0.891594	-0.325655	-0.996096	0.714942	0	NA	NA	0.04133	-8.05116
72	895	Nillson_TopS	895	896	NA	-0.671739	0.466372	-0.84218	-0.313381	0.859972	0.462365	0.0597729	-0.053439	-0.482803	1.03342	0.526106	0.0273897	-0.696867	0	-7574.63	-22170.9	8.83648	-17.3626
96	896	Nillson_TopS	896	897	NA	-0.279723	1.14569	-0.480112	-0.363702	1.55904	-0.875569	0.82204	0.446735	0.26144	-0.531361	-0.154409	-0.301227	-0.720977	0	-36535.2	-20051.6	5.64891	-15.0421
87	897	Nillson_TopS	897	898	NA	1.41158	-0.150776	-0.196857	0.952891	0.264513	-0.41681	0.0212953	0.251608	-0.322732	-1.02089	-0.105781	-0.637589	0.342582	0	-51054.6	-28169.2	-2.80321	-1.98428
71	898	Nillson_TopS	898	899	NA	-1.47584	-0.385116	3.26379	-0.322824	-0.494206	-0.383328	-0.286752	-0.0977164	1.70102	-0.311787	-0.920746	0.687056	0.309962	0	14322.2	13391	-7.2091	4.52457
90	899	Nillson_TopS	899	900	NA	1.12617	0.0558297	-0.801037	-0.105669	0.558087	-0.365107	0.16921	0.341967	-0.164245	-0.480019	0.236105	-0.369858	0.0641775	0	-47965.1	-26503.3	0.04133	-8.05116
90	900	Nillson_TopS	900	901	NA	1.111	0.337367	-0.951212	0.0264597	0.729605	-0.409472	0.168566	0.796806	-0.27717	-0.860678	0.079372	-0.473952	0.145105	0	NA	NA	0.04133	-8.05116
103	901	Nillson_TopS	901	902	NA	0.0555536	0.404465	0.125274	-0.630374	-1.30422	2.54679	-1.3292	-1.34182	-0.716091	2.11823	0.119077	0.759275	0.775692	0	57880.8	-11779.2	-1.77317	21.6487
90	902	Nillson_TopS	902	903	NA	1.16047	0.160531	-0.398576	0.366277	0.647463	-0.414842	0.228681	0.239662	-0.174014	-0.895814	-0.364658	-0.433345	0.159296	0	NA	NA	0.04133	-8.05116
81	903	Nillson_TopS	903	904	NA	0.681038	0.484206	-0.697365	-0.483508	0.866892	-0.743208	0.439034	0.494538	0.0353925	-0.59729	0.281703	-0.340213	-0.0612563	0	-41652.5	-23845.5	3.47305	-13.3053
90	904	Nillson_TopS	904	905	NA	1.46259	0.0115933	-0.623309	0.804249	0.426594	-0.300827	0.0344003	0.10337	-0.293992	-0.9542	-0.241424	-0.481123	0.444109	0	NA	NA	0.04133	-8.05116
87	905	Nillson_TopS	905	906	NA	1.66328	-0.227973	-0.821654	0.00740764	0.450621	-0.317412	0.10887	0.886702	-0.344883	-0.854534	-0.170769	-0.586379	0.736701	0	NA	NA	-2.80321	-1.98428
90	906	Nillson_TopS	906	907	NA	0.729738	0.0706932	-0.361581	-0.0734155	0.393634	-0.525952	-0.00653351	0.628387	-0.339895	-0.375171	0.551996	-0.408233	-0.0901256	0	NA	NA	0.04133	-8.05116
71	907	Nillson_TopS	907	908	NA	-1.30119	-0.257072	1.86031	-0.0854806	-0.595665	0.0785262	-0.247694	0.40705	1.54553	0.32633	-0.564349	-0.107059	-0.163895	0	13113.4	16653.5	-7.2091	4.52457
94	908	Nillson_TopS	908	909	NA	-0.923576	0.536495	-0.317385	-0.537497	1.15067	0.711641	0.24824	-1.13681	-0.23371	1.26762	0.437079	0.0468841	-0.643394	0	NA	NA	11.5245	-18.2658
75	909	Nillson_TopS	909	910	NA	1.71418	-0.836818	0.0319105	0.768327	-1.1644	0.0519703	-0.609208	1.53636	-0.670923	-0.288107	0.27433	-0.500167	0.51141	0	-18812.3	2471.83	-3.41715	-0.207763
81	910	Nillson_TopS	910	911	NA	0.440074	0.855069	-0.941561	-0.0981779	1.41705	-0.653271	0.746559	-0.094114	0.152022	-0.663688	-0.0300079	-0.273253	-0.35265	0	-40327.6	-21601.1	3.47305	-13.3053
87	911	Nillson_TopS	911	912	NA	1.76583	-0.644265	-0.543717	0.0480143	-0.504638	-0.0357312	-0.26502	1.01059	-0.249742	-0.518765	0.260228	-0.479261	0.622051	0	-48377.2	-27264.8	-2.80321	-1.98428
101	912	Nillson_TopS	912	913	NA	0.704767	0.290254	-0.47989	0.116314	0.854478	-0.544103	0.382335	0.321848	-0.0697269	-0.678423	-0.15439	-0.283536	-0.228421	0	-44401.2	-23202	1.66122	-10.7159
74	913	Nillson_TopS	913	914	NA	-1.06081	0.606345	-0.193986	0.0350984	1.15199	0.300921	0.108928	-1.13349	-0.536844	0.853093	1.57189	-0.0622801	-0.965413	0	-2175.81	-24010.6	10.1585	-18.3044
76	914	Nillson_TopS	914	915	NA	-0.927801	-0.054697	0.338513	0.44723	-0.839472	0.149115	-0.610103	1.69121	0.293542	0.55197	0.808998	-0.329228	-0.759875	0	-4997.07	19262.4	-3.9653	1.78471
87	915	Nillson_TopS	915	916	NA	1.66525	-0.625719	-0.583907	-0.0379179	-0.119669	-0.0623996	0.144364	0.525936	-0.278462	-0.718249	-0.144685	-0.0995555	0.710825	0	NA	NA	-2.80321	-1.98428
81	916	Nillson_TopS	916	917	NA	0.635636	0.760023	-0.880296	-0.34819	1.1991	-0.770886	0.757457	0.277698	0.172138	-0.744653	0.108897	-0.28953	-0.370762	0	NA	NA	3.47305	-13.3053
71	917	Nillson_TopS	917	918	NA	-0.941313	-0.201603	2.15694	-0.164378	-0.206371	-0.359988	-0.455411	0.302356	1.25285	-0.0232117	-0.830007	0.264242	-0.0946884	0	13389.2	15220	-7.2091	4.52457
90	918	Nillson_TopS	918	919	NA	1.42768	0.132699	-0.620869	-0.190803	0.397521	-0.30961	0.171522	0.183533	-0.265334	-0.687314	0.0551802	-0.364603	0.349089	0	NA	NA	0.04133	-8.05116
73	919	Nillson_TopS	919	920	NA	-1.59253	-0.917903	1.33136	2.7206	-0.688705	-0.126629	-0.24586	1.48854	-0.103094	0.212149	0.268918	-0.123917	-0.789053	0	-3072.18	18790.6	-4.75949	1.27338
76	920	Nillson_TopS	920	921	NA	-0.987082	-0.582171	0.013806	0.482461	-0.956327	-0.278867	0.0655157	1.85931	-0.0864668	0.377914	0.842136	0.297266	-0.424792	0	-8200.58	20039.8	-3.9653	1.78471
90	921	Nillson_TopS	921	922	NA	1.34553	0.112819	-0.494277	0.207403	0.700215	-0.319139	0.168047	0.0551116	-0.114406	-0.983111	-0.104292	-0.502595	0.243433	0	NA	NA	0.04133	-8.05116
90	922	Nillson_TopS	922	923	NA	1.55421	0.260215	-0.925265	0.252993	0.652586	-0.3565	0.0228379	0.500185	-0.292713	-1.01329	-0.0723539	-0.637951	0.56776	0	NA	NA	0.04133	-8.05116
90	923	Nillson_TopS	923	924	NA	1.27922	-0.309758	-0.586491	-0.215812	0.209149	-0.295424	0.0331571	0.563655	-0.285879	-0.576624	0.508051	-0.280633	0.221593	0	NA	NA	0.04133	-8.05116
90	924	Nillson_TopS	924	925	NA	1.2398	-0.00373596	-0.478682	-0.10111	0.572435	-0.411091	0.519972	0.110751	0.0796737	-0.921074	-0.556672	-0.0733507	0.342272	0	NA	NA	0.04133	-8.05116
81	925	Nillson_TopS	925	926	NA	0.845231	0.53114	-0.752708	-0.364102	0.956062	-0.644859	0.446479	0.336484	0.261851	-0.675308	-0.109442	-0.434288	-0.0285358	0	NA	NA	3.47305	-13.3053
90	926	Nillson_TopS	926	927	NA	1.12363	0.33654	-0.488876	0.210902	0.618596	-0.545646	0.229307	0.173288	-0.190077	-0.987896	0.0148225	-0.40071	0.205535	0	NA	NA	0.04133	-8.05116
90	927	Nillson_TopS	927	928	NA	1.43811	0.25097	-0.38361	-0.127312	0.582945	-0.407877	0.187295	0.63436	-0.255745	-0.785484	-0.401764	-0.756311	0.396522	0	NA	NA	0.04133	-8.05116
87	928	Nillson_TopS	928	929	NA	1.44558	-0.601339	-0.194888	0.45887	-0.223247	-0.120069	-0.159662	0.661856	-0.539174	-0.742594	0.333713	-0.456419	0.51539	0	-49858.4	-29060	-2.80321	-1.98428
90	929	Nillson_TopS	929	930	NA	1.20806	0.435744	-0.571773	0.28339	0.831357	-0.47617	0.28906	0.17016	-0.129939	-0.950629	-0.535491	-0.404738	0.230275	0	-48969	-24128.1	0.04133	-8.05116
104	930	Nillson_TopS	930	931	NA	-0.188088	0.383802	0.220228	-0.905879	-1.13291	2.37977	-1.64638	-1.9594	-0.672415	1.95426	2.36536	0.752057	0.691794	0	49361.6	-15647.4	-1.20331	25.4698
68	931	Nillson_TopS	931	932	NA	-0.854935	0.0641659	1.68273	0.925668	-0.764545	0.247163	-0.758954	-0.0586413	-0.321771	0.762989	-0.442431	0.251788	0.0489122	0	30568.3	22920.3	-7.16747	12.5824
87	932	Nillson_TopS	932	933	NA	1.92765	-0.180038	-0.422969	0.25437	0.219114	0.0391883	-0.0489135	0.341257	-0.518711	-0.851177	-0.536909	-0.575224	0.818881	0	NA	NA	-2.80321	-1.98428
90	933	Nillson_TopS	933	934	NA	1.63454	0.0776839	-0.480776	0.0692677	0.581182	-0.344282	-0.0416221	0.449181	-0.453601	-0.721155	-0.201332	-0.8006	0.627183	0	NA	NA	0.04133	-8.05116
80	934	Nillson_TopS	934	935	NA	-1.14583	-0.623984	0.366729	0.103986	-1.16789	0.662536	0.473761	-0.0230018	0.503204	1.22906	-0.730474	0.911034	0.241318	0	3745.43	38463.6	-4.13488	11.909
87	935	Nillson_TopS	935	936	NA	1.83429	-0.168639	-0.618559	0.284899	0.213801	-0.0917114	-0.0258108	0.235606	-0.571905	-0.876391	0.0135909	-0.47786	0.666737	0	NA	NA	-2.80321	-1.98428
88	936	Nillson_TopS	936	937	NA	-0.434348	0.170187	0.192381	-0.88595	-1.15402	1.86516	-1.48935	-0.493824	0.304821	1.27692	1.57199	0.186479	0.0123687	0	55250.6	-16233	-1.47868	23.5644
87	937	Nillson_TopS	937	938	NA	1.75517	-0.317549	-0.330145	0.253329	0.0625312	-0.127983	-0.135788	0.248284	-0.456431	-1.00414	0.137211	-0.391844	0.676124	0	NA	NA	-2.80321	-1.98428
95	938	Nillson_TopS	938	939	NA	-1.2329	0.0504089	1.65687	-0.692351	-0.237266	0.137475	-0.484838	1.30952	1.70808	0.638767	-1.36554	0.0135445	-0.399525	0	12653.1	18459.2	-5.89098	4.66014
90	939	Nillson_TopS	939	940	NA	1.1432	0.217279	-0.341364	-0.0720615	0.736691	-0.299286	0.16489	-0.0351943	-0.450674	-0.821876	0.151733	-0.374485	0.233793	0	NA	NA	0.04133	-8.05116
101	940	Nillson_TopS	940	941	NA	0.603278	0.303586	-0.864511	-0.287443	0.696801	-0.611626	0.503136	0.409568	0.185526	-0.562803	0.233714	-0.245935	-0.049477	0	NA	NA	1.66122	-10.7159
96	941	Nillson_TopS	941	942	NA	-0.181298	0.399648	-0.132828	-0.535362	0.791204	-0.523828	0.424315	1.08187	-0.116627	-0.261867	0.166596	-0.0399233	-0.781321	0	-33820	-18741.4	5.64891	-15.0421
104	942	Nillson_TopS	942	943	NA	-0.53031	-0.133102	-0.0115822	-0.60271	-1.32786	1.78909	-0.650181	-1.85362	-0.315085	1.66269	2.3083	0.770506	0.447228	0	47883.8	-15754.8	-1.20331	25.4698
78	943	Nillson_TopS	943	944	NA	1.28871	-0.021322	-0.679962	0.357918	0.516041	-0.513705	0.240771	0.661246	-0.0890735	-0.813746	-0.753283	-0.214499	0.424627	0	-52034.4	-25474.9	-1.47521	-5.09834
91	944	Nillson_TopS	944	945	NA	-0.752014	-0.785795	0.544185	0.995323	-0.709338	-0.187791	0.477454	-0.995678	0.697065	0.235115	0.337909	0.725054	-0.0221977	0	-4104.3	18437.4	-3.17219	1.32407
87	945	Nillson_TopS	945	946	NA	1.4003	-0.113846	-0.896877	-0.133105	0.327434	-0.390886	0.136463	0.630952	-0.156504	-0.807893	0.246849	-0.266685	0.41903	0	NA	NA	-2.80321	-1.98428
96	946	Nillson_TopS	946	947	NA	0.387744	0.209967	-0.315595	-0.419165	0.838497	-0.592802	0.332114	0.664164	-0.0406157	-0.530819	0.232181	-0.351485	-0.176912	0	-39222.7	-22651	5.64891	-15.0421
71	947	Nillson_TopS	947	948	NA	-1.26836	-0.284003	2.13672	-0.213865	-0.18808	-0.45239	-0.252281	0.416124	1.47781	-0.0851308	-1.03834	0.407714	0.268743	0	NA	NA	-7.2091	4.52457
91	948	Nillson_TopS	948	949	NA	-0.137329	-0.98527	0.186979	1.00862	-0.948459	-0.170895	0.317562	-0.848479	0.434803	0.105111	0.506207	0.676086	0.41652	0	-6659.19	17094.3	-3.17219	1.32407
90	949	Nillson_TopS	949	950	NA	0.9627	-0.372576	-0.31663	-0.14435	0.307972	-0.480395	0.482373	0.209995	0.371478	-0.606039	-0.307525	-0.0337724	0.136389	0	NA	NA	0.04133	-8.05116
85	950	Nillson_TopS	950	951	NA	1.15013	-0.629297	1.99918	0.242111	-0.577949	0.6007	-0.800943	-0.965968	-0.0220432	0.907505	-1.39362	0.0794193	0.486594	0	26495.4	18889.4	-6.1752	13.2135
90	951	Nillson_TopS	951	952	NA	1.29809	-0.0307746	-0.65188	-0.170059	0.380153	-0.341176	0.323635	0.579502	-0.188735	-0.688238	-0.393321	-0.095916	0.268002	0	NA	NA	0.04133	-8.05116
71	952	Nillson_TopS	952	953	NA	-1.19844	-0.433062	3.35173	-0.219203	-0.378439	-0.568631	-0.128404	-0.577901	1.46353	-0.641875	-0.825604	0.862371	0.545944	0	14888.2	11450.2	-7.2091	4.52457
78	953	Nillson_TopS	953	954	NA	1.43908	-0.436124	-0.189416	0.767259	-0.0150435	-0.476189	0.0460799	0.511353	-0.264865	-0.759745	-0.496503	-0.232529	0.448389	0	-52933.4	-28904	-1.47521	-5.09834
68	954	Nillson_TopS	954	955	NA	-0.878563	0.0899483	1.59363	0.926668	-0.560107	0.169189	-0.891105	-0.148307	-0.314393	0.975475	-0.529457	0.456464	-0.0910396	0	30829.8	22636.8	-7.16747	12.5824
74	955	Nillson_TopS	955	956	NA	-0.966992	1.06524	-0.468442	-0.512357	1.42396	0.449706	0.564113	-1.63895	-0.190856	0.904433	1.23736	-0.0578931	-0.899867	0	-1776.28	-26678.7	10.1585	-18.3044
90	956	Nillson_TopS	956	957	NA	1.08327	0.326804	-0.595619	-0.0144206	0.800331	-0.495829	0.296405	-0.010792	0.123831	-0.935497	-0.0127007	-0.456702	0.207046	0	-47380.3	-24523.9	0.04133	-8.05116
81	957	Nillson_TopS	957	958	NA	0.371534	-0.0438201	-0.191327	0.226111	0.515406	-0.637997	0.304232	0.278194	0.0170483	-0.702994	0.29235	-0.12219	-0.153937	0	NA	NA	3.47305	-13.3053
90	958	Nillson_TopS	958	959	NA	1.01631	-0.0562006	-0.412678	0.15691	0.445327	-0.370253	0.0123272	0.547419	-0.23962	-0.65581	0.344112	-0.493668	-0.0678863	0	NA	NA	0.04133	-8.05116
71	959	Nillson_TopS	959	960	NA	-1.0719	-0.20342	2.81976	-0.287327	-0.469129	-0.593267	-0.0896861	0.0343943	1.48453	-0.460889	-0.669251	0.439572	0.105745	0	NA	NA	-7.2091	4.52457
90	960	Nillson_TopS	960	961	NA	1.26983	-0.177385	-0.301685	0.147575	0.203482	-0.485553	0.0373153	0.839054	-0.266756	-0.673923	0.0570793	-0.691881	0.359031	0	NA	NA	0.04133	-8.05116
83	961	Nillson_TopS	961	962	NA	-0.469402	-0.738603	0.814271	-0.578628	-1.1326	1.43065	-0.977421	-1.66736	-0.330685	2.37121	1.79676	1.10262	0.112184	0	44222.7	-13640.7	-0.90395	27.6653
90	962	Nillson_TopS	962	963	NA	1.07851	0.127059	-0.517052	-0.182627	0.724925	-0.560691	0.462013	-0.0658749	-0.0529615	-0.788126	0.271883	-0.29038	0.0811179	0	-46452.6	-25243.5	0.04133	-8.05116
90	963	Nillson_TopS	963	964	NA	1.40913	0.36829	-0.92273	-0.0576974	0.904439	-0.353385	0.268654	0.25126	-0.122001	-0.856586	-0.383722	-0.525397	0.48462	0	-50164.4	-25045.9	0.04133	-8.05116
89	964	Nillson_TopS	964	965	NA	-1.27677	0.674898	0.17007	0.959943	1.13535	-0.026878	0.129699	-1.70012	-0.182461	0.442667	1.89391	-0.228587	-1.04337	0	-2308.74	-22742.3	11.2514	-19.9456
71	965	Nillson_TopS	965	966	NA	-0.899907	-0.0388833	1.9308	-0.11714	-0.351349	-0.467501	-0.17503	0.42003	1.69765	-0.00152998	-0.595061	-0.25337	-0.408534	0	12695.6	16081.7	-7.2091	4.52457
87	966	Nillson_TopS	966	967	NA	1.59275	-0.379138	-0.572185	0.269621	0.287282	-0.1852	0.126237	0.319468	-0.242892	-0.969657	-0.149242	-0.340287	0.619502	0	NA	NA	-2.80321	-1.98428
87	967	Nillson_TopS	967	968	NA	1.65261	-0.26337	-0.523221	0.133584	0.299937	-0.304198	0.1284	0.32683	-0.219444	-0.888844	-0.355967	-0.233168	0.592368	0	-53654.3	-28044.9	-2.80321	-1.98428
87	968	Nillson_TopS	968	969	NA	1.87225	-0.242818	-0.292913	0.0754859	-0.0835902	-0.0342681	-0.151711	1.22375	-0.418737	-0.823953	-0.66323	-0.582018	0.643194	0	NA	NA	-2.80321	-1.98428
90	969	Nillson_TopS	969	970	NA	1.62618	-0.144531	-0.354918	-0.0148352	0.568121	-0.399677	0.126261	0.362829	-0.411709	-0.803092	-0.115041	-0.449344	0.352884	0	NA	NA	0.04133	-8.05116
72	970	Nillson_TopS	970	971	NA	-0.492365	0.195923	-0.292182	0.0164928	0.520669	0.320728	-0.276992	0.0508418	-0.693757	0.862392	0.948464	-0.0791143	-0.815211	0	-5986.77	-20430.1	8.83648	-17.3626
104	971	Nillson_TopS	971	972	NA	-0.326841	-0.477292	0.592484	-0.608219	-1.4951	2.08474	-1.18893	-1.86725	-0.474423	2.52617	1.85586	1.10424	0.534354	0	49118.2	-13868.3	-1.20331	25.4698
90	972	Nillson_TopS	972	973	NA	1.28253	0.0976644	-0.673207	-0.0844383	0.436994	-0.5323	0.318974	0.187462	-0.116137	-0.859717	0.133201	-0.223202	0.330003	0	NA	NA	0.04133	-8.05116
94	973	Nillson_TopS	973	974	NA	-1.09943	0.532408	-0.0601045	-0.842822	0.889419	0.394357	0.16917	-1.72833	-0.151952	0.977528	2.86529	0.0434277	-0.786515	0	3678.52	-24644.7	11.5245	-18.2658
87	974	Nillson_TopS	974	975	NA	1.53673	-0.0960248	-0.530734	0.2169	0.219802	-0.304622	-0.0450922	0.659973	-0.195331	-0.949685	-0.114307	-0.551377	0.529295	0	NA	NA	-2.80321	-1.98428
90	975	Nillson_TopS	975	976	NA	1.48228	-0.141836	-0.327879	0.0486996	0.0466923	-0.325726	-0.302573	0.763649	-0.725383	-0.723673	0.599042	-0.391199	0.366009	0	NA	NA	0.04133	-8.05116
90	976	Nillson_TopS	976	977	NA	0.910506	0.248511	-0.897701	-0.212311	0.817964	-0.619566	0.522862	0.36478	0.102898	-0.774307	-0.136985	-0.179496	0.2332	0	NA	NA	0.04133	-8.05116
71	977	Nillson_TopS	977	978	NA	-0.634733	-0.239299	0.905571	0.0299326	-0.130749	-0.489712	0.386723	0.23264	1.32136	0.0170691	-1.31818	0.76398	-0.248481	0	10975.7	16696.1	-7.2091	4.52457
89	978	Nillson_TopS	978	979	NA	-1.0263	0.682423	-0.0710523	0.563879	0.981598	0.136481	0.12261	-1.23966	-0.153143	0.828173	0.88517	-0.0154174	-1.08639	0	-3281.01	-23984.8	11.2514	-19.9456
81	979	Nillson_TopS	979	980	NA	0.522995	1.15806	-0.94895	-0.142877	1.57031	-0.553276	0.674997	0.124219	0.224998	-0.71343	-0.521299	-0.439115	-0.395992	0	NA	NA	3.47305	-13.3053
100	980	Nillson_TopS	980	981	NA	-1.08271	-0.629719	0.470618	-0.529623	-1.17345	1.00023	-1.06798	1.03159	-0.713742	1.60185	1.97933	0.613512	-0.259822	0	29247.7	-13320.8	-0.457409	31.025
81	981	Nillson_TopS	981	982	NA	0.771359	0.537073	-0.600451	-0.0657028	1.17381	-0.697456	0.543613	0.547727	-0.0535814	-0.821754	-0.538984	-0.305659	-0.0817525	0	NA	NA	3.47305	-13.3053
90	982	Nillson_TopS	982	983	NA	0.347464	0.339939	-0.314111	0.441147	0.777493	-0.634197	0.394836	0.346339	0.178402	-0.789403	-0.34149	-0.147702	-0.358572	0	NA	NA	0.04133	-8.05116
90	983	Nillson_TopS	983	984	NA	0.883012	0.182168	-0.376772	0.358177	0.501619	-0.536152	0.283333	0.222191	0.136444	-0.724827	-0.163681	-0.255962	-0.290489	0	NA	NA	0.04133	-8.05116
90	984	Nillson_TopS	984	985	NA	1.70178	0.203695	-0.750612	0.398158	0.63784	-0.275287	0.183359	0.757099	-0.498863	-0.851832	-0.748703	-0.730844	0.556458	0	NA	NA	0.04133	-8.05116
75	985	Nillson_TopS	985	986	NA	1.15849	-0.999866	0.0539052	0.30274	-1.235	-0.0716174	-0.0282138	0.754661	-0.150833	-0.132933	0.411937	0.188191	0.26981	0	-15955	5399.41	-3.41715	-0.207763
90	986	Nillson_TopS	986	987	NA	1.08158	0.32862	-0.331014	0.0703673	0.784819	-0.367401	0.0128352	0.404131	-0.325526	-0.860222	0.209323	-0.74924	0.0443858	0	NA	NA	0.04133	-8.05116
81	987	Nillson_TopS	987	988	NA	0.578854	0.657956	-0.662678	-0.427533	1.18211	-0.557108	0.553648	0.654294	0.0376716	-0.655717	-0.453132	-0.501739	0.00372763	0	NA	NA	3.47305	-13.3053
87	988	Nillson_TopS	988	989	NA	1.72695	-0.557548	-0.228129	0.157441	-0.32047	-0.178677	0.0188447	0.305654	-0.16188	-1.0234	0.0418792	-0.0962187	0.682794	0	NA	NA	-2.80321	-1.98428
81	989	Nillson_TopS	989	990	NA	0.633815	0.170284	-0.344284	0.111424	0.66882	-0.571897	0.173004	0.576806	-0.2682	-0.771313	0.598433	-0.531632	-0.194061	0	NA	NA	3.47305	-13.3053
101	990	Nillson_TopS	990	991	NA	0.827449	0.410472	-0.606717	-0.0806361	0.869636	-0.604526	0.280626	0.454528	-0.0753263	-0.775895	-0.195613	-0.307572	0.0990173	0	NA	NA	1.66122	-10.7159
90	991	Nillson_TopS	991	992	NA	0.758947	-0.135055	-0.340038	0.525214	0.440288	-0.786475	0.0701146	0.983944	-0.37357	-0.63915	0.104793	-0.446355	0.138036	0	NA	NA	0.04133	-8.05116
90	992	Nillson_TopS	992	993	NA	1.57145	0.0978933	-0.53317	-0.0286092	0.617197	-0.324443	-0.0152077	0.284087	-0.410082	-0.890076	-0.0309464	-0.569139	0.598008	0	NA	NA	0.04133	-8.05116
87	993	Nillson_TopS	993	994	NA	1.82408	-0.269006	-0.466584	0.574709	0.143636	-0.14019	-0.191389	0.250944	-0.563229	-0.836385	0.137449	-0.803753	0.81719	0	NA	NA	-2.80321	-1.98428
80	994	Nillson_TopS	994	995	NA	-0.994111	-0.590823	0.386423	0.775562	-1.08741	0.63709	0.537264	-0.162564	0.411671	0.850365	-1.19734	0.7923	0.512784	0	3579.48	38142	-4.13488	11.909
88	995	Nillson_TopS	995	996	NA	-0.303357	0.265127	0.528628	-0.965285	-0.973963	2.01203	-1.38445	-1.31569	0.823839	1.48548	0.463355	0.354023	0.243639	0	56690.8	-11659.7	-1.47868	23.5644
90	996	Nillson_TopS	996	997	NA	1.48903	0.249191	-0.827456	0.248894	0.685078	-0.431217	0.163289	0.453301	-0.369558	-1.02119	-0.0345939	-0.531291	0.385584	0	NA	NA	0.04133	-8.05116
103	997	Nillson_TopS	997	998	NA	-0.00980432	0.0823795	0.333202	-0.628507	-0.808886	2.32872	-1.15557	-1.82915	-0.409096	2.37216	-0.152881	1.10546	0.431974	0	58849.3	-11495.2	-1.77317	21.6487
76	998	Nillson_TopS	998	999	NA	-1.31032	-0.843458	0.620182	0.548066	-1.24258	0.147685	0.231086	1.56387	0.377665	0.244542	0.342824	0.388007	-0.183835	0	-6580.81	26353.5	-3.9653	1.78471
93	999	Nillson_TopS	999	1000	NA	-1.51266	-0.589335	0.321311	0.720983	-1.06869	-0.146941	0.917521	1.52207	0.749123	0.15402	-0.818444	0.791477	-0.0602629	0	-3962.27	32421.8	-4.40299	4.80104
89	1000	Nillson_TopS	1000	1001	NA	-1.08997	0.755983	-0.0127797	1.02888	1.29157	0.318891	0.306922	-2.36118	-0.0491274	0.840003	1.15509	0.122127	-0.956027	0	-2531.84	-23762.4	11.2514	-19.9456
94	1001	Nillson_TopS	1001	1002	NA	-0.994497	0.373873	-0.194614	-0.874692	0.828874	0.83319	-0.0198717	-1.89431	-0.303052	1.41788	2.03964	0.372452	-0.448077	0	2597.91	-24485.7	11.5245	-18.2658
89	1002	Nillson_TopS	1002	1003	NA	-0.872326	0.465525	-0.319613	0.64832	0.866037	0.12244	-0.00454134	-0.241754	-0.513728	0.627864	0.910083	-0.390947	-0.921334	0	-6327.31	-22269.3	11.2514	-19.9456
104	1003	Nillson_TopS	1003	1004	NA	-0.542084	-0.345727	0.8133	-0.808738	-1.28441	1.69458	-1.36226	-1.19243	-0.218465	1.63289	2.28323	0.684165	0.179804	0	49601.2	-17489.9	-1.20331	25.4698
81	1004	Nillson_TopS	1004	1005	NA	0.249417	0.768663	-0.679909	-0.271041	1.23196	-0.822422	0.580492	0.724609	0.0938243	-0.640984	0.0237972	-0.33124	-0.491863	0	NA	NA	3.47305	-13.3053
94	1005	Nillson_TopS	1005	1006	NA	-0.973878	0.580456	-0.243176	-0.621855	1.09449	0.59506	0.247346	-1.81461	-0.140801	1.15666	1.78782	0.104646	-0.71711	0	1561.22	-25673	11.5245	-18.2658
83	1006	Nillson_TopS	1006	1007	NA	-0.722418	-0.479686	0.788203	-0.0199304	-1.24238	1.49503	-1.17848	-1.6891	-0.40764	2.30219	1.71662	1.0437	0.21031	0	42797.7	-12058.8	-0.90395	27.6653
90	1007	Nillson_TopS	1007	1008	NA	1.29813	0.185705	-0.770978	0.177068	0.63246	-0.338252	0.120613	0.567729	-0.260249	-0.921166	-0.0757276	-0.510605	0.271374	0	NA	NA	0.04133	-8.05116
87	1008	Nillson_TopS	1008	1009	NA	1.72644	-0.299545	-0.638284	0.308719	0.199575	-0.282257	0.11352	0.183507	-0.161051	-1.09658	0.101113	-0.361572	0.649808	0	NA	NA	-2.80321	-1.98428
71	1009	Nillson_TopS	1009	1010	NA	-1.16907	-0.345272	2.27032	-0.200326	-0.177032	-0.308916	-0.072837	0.454886	1.44994	-0.0979485	-1.21744	0.430329	-0.0990597	0	NA	NA	-7.2091	4.52457
77	1010	Nillson_TopS	1010	1011	NA	0.164254	1.00831	-0.771351	0.203609	1.4386	-0.552671	0.397521	0.265503	-0.22677	-0.25246	0.181375	-0.790388	-0.598444	0	-29654.4	-22056.4	7.51315	-16.4179
78	1011	Nillson_TopS	1011	1012	NA	1.24963	-0.13207	-0.532423	-0.127004	0.34353	-0.511475	0.200548	0.25913	0.103969	-0.795506	-0.0129442	-0.157973	0.37111	0	-52099.3	-27478.7	-1.47521	-5.09834
69	1012	Nillson_TopS	1012	1013	NA	-0.55275	-0.00133145	0.493662	-0.67218	-0.99947	1.83489	-1.14103	0.342113	0.667029	1.66478	-1.28038	0.494072	0.250759	0	54439.5	-4512.7	-2.63306	16.7582
89	1013	Nillson_TopS	1013	1014	NA	-1.44012	0.234065	1.63779	1.90836	0.530405	-0.104091	-0.150183	-1.97872	-0.114043	0.497135	1.16778	-0.120706	-0.858634	0	2130.79	-14424	11.2514	-19.9456
94	1014	Nillson_TopS	1014	1015	NA	-0.880677	1.1507	-0.368555	0.0444817	1.61074	0.186325	0.722709	-2.41663	-0.0332862	0.755576	1.70483	-0.072725	-0.921053	0	-1090.24	-25714.6	11.5245	-18.2658
103	1015	Nillson_TopS	1015	1016	NA	-0.159169	-0.047358	-0.244231	-0.826677	-0.942406	2.24915	-1.10738	-1.5773	-0.827591	2.41741	0.82734	1.09935	0.669334	0	54855.2	-12784.3	-1.77317	21.6487
90	1016	Nillson_TopS	1016	1017	NA	1.10574	0.222602	-0.747334	-0.100672	0.726379	-0.56455	0.159405	0.0973483	0.0835442	-0.713838	0.416289	-0.348248	-0.0222611	0	NA	NA	0.04133	-8.05116
94	1017	Nillson_TopS	1017	1018	NA	-1.26574	0.221957	0.282399	-0.330198	0.600341	0.505426	-0.204088	-1.425	-0.656996	1.06242	2.73966	0.128019	-0.704632	0	2971.97	-23050.9	11.5245	-18.2658
72	1018	Nillson_TopS	1018	1019	NA	-0.264444	-0.37692	-0.302511	-0.0222502	-0.228223	0.615786	-0.746664	0.475832	-0.990599	1.26583	1.10335	0.209225	-0.269936	0	410.982	-16182.7	8.83648	-17.3626
81	1019	Nillson_TopS	1019	1020	NA	0.793027	0.624211	-0.658773	-0.327727	1.23271	-0.571743	0.40743	0.312531	-0.136184	-0.674397	0.123559	-0.692455	-0.0307194	0	NA	NA	3.47305	-13.3053
71	1020	Nillson_TopS	1020	1021	NA	-1.24151	-0.31365	2.82592	-0.118218	-0.251287	-0.752161	-0.382624	-0.0630963	1.35551	-0.519221	-0.340504	0.520018	0.410515	0	13910.3	12046.7	-7.2091	4.52457
76	1021	Nillson_TopS	1021	1022	NA	-1.28958	-0.563547	0.399117	0.509963	-0.82702	0.173724	0.250942	0.594074	0.403693	0.415162	-0.175978	0.754023	-0.121467	0	-3848.14	32038.8	-3.9653	1.78471
83	1022	Nillson_TopS	1022	1023	NA	-0.670049	-0.753862	0.465603	-0.363442	-1.30575	1.3956	-1.09392	-1.52289	-0.543596	2.19726	3.20154	0.964073	0.0935553	0	39907	-15753.3	-0.90395	27.6653
95	1023	Nillson_TopS	1023	1024	NA	-0.809316	-0.27392	1.30395	-0.0675007	-0.27953	-0.260599	-0.414794	0.622962	1.63781	-0.0575222	-0.796943	-0.104212	0.138555	0	12963.9	16746.5	-5.89098	4.66014
76	1024	Nillson_TopS	1024	1025	NA	-1.48729	-0.681108	0.809714	0.86091	-0.876948	-0.250418	0.339064	1.50316	0.316811	-0.147373	0.232777	0.597945	-0.370278	0	NA	NA	-3.9653	1.78471
94	1025	Nillson_TopS	1025	1026	NA	-1.07114	1.17533	1.00824	-0.77956	1.59924	0.0189593	0.555886	-2.50432	0.446537	0.420902	1.42603	0.00929685	-0.854969	0	3638.3	-21733.9	11.5245	-18.2658
69	1026	Nillson_TopS	1026	1027	NA	-0.421123	0.0652686	0.42846	-0.50531	-1.0513	1.84745	-1.1169	-1.47932	0.835468	2.15123	-0.605816	0.926397	0.272806	0	59090	-5236.16	-2.63306	16.7582
71	1027	Nillson_TopS	1027	1028	NA	-1.27693	-0.336033	2.76992	-0.198491	-0.364602	-0.634053	-0.10369	0.167579	1.35007	-0.460487	-0.664954	0.550286	0.313385	0	13740.3	13191.1	-7.2091	4.52457
101	1028	Nillson_TopS	1028	1029	NA	1.14292	0.596639	-0.730418	0.0479042	0.927166	-0.404758	0.445571	0.119664	0.0401935	-0.973968	-0.526267	-0.431096	0.171335	0	-47400.2	-23402.1	1.66122	-10.7159
70	1029	Nillson_TopS	1029	1030	NA	-0.79514	0.737739	1.06881	-0.403587	1.3287	-1.13013	0.663485	3.67844	0.529304	-0.712391	-1.51085	-0.439786	-1.19944	0	-18117.1	-2721.09	-1.98822	5.2871
90	1030	Nillson_TopS	1030	1031	NA	0.555337	0.0810362	-0.296492	-0.0368889	0.704336	-0.577901	0.374972	0.777815	-0.118991	-0.444056	-0.245705	-0.349697	-0.221442	0	NA	NA	0.04133	-8.05116
74	1031	Nillson_TopS	1031	1032	NA	-0.946386	0.594605	-0.582409	0.00606299	1.03338	0.297746	0.232378	-0.885358	-0.360167	0.932698	0.912047	-0.044985	-0.713398	0	-2931.28	-25049	10.1585	-18.3044
94	1032	Nillson_TopS	1032	1033	NA	-1.03005	0.588154	0.104857	-0.793072	1.00918	0.328266	0.200306	-1.8731	-0.367837	0.921188	2.7367	0.00367516	-0.636331	0	NA	NA	11.5245	-18.2658
90	1033	Nillson_TopS	1033	1034	NA	1.28389	0.323631	-0.711753	0.0843573	0.762583	-0.215761	0.217607	-0.168606	-0.231195	-0.832407	0.104358	-0.532509	0.251039	0	NA	NA	0.04133	-8.05116
94	1034	Nillson_TopS	1034	1035	NA	-0.657838	0.216341	-0.537411	-0.569237	0.7028	0.304499	-0.0713409	0.343779	-0.657469	0.73658	1.55825	-0.0887058	-0.830604	0	NA	NA	11.5245	-18.2658
81	1035	Nillson_TopS	1035	1036	NA	0.7266	0.036666	-0.563335	-0.339235	0.627353	-0.465058	0.444671	0.385161	0.258908	-0.665421	0.361542	-0.315874	-0.234646	0	NA	NA	3.47305	-13.3053
84	1036	Nillson_TopS	1036	1037	NA	-1.04678	-0.680013	0.148535	0.531709	-1.06361	0.441652	0.617291	-0.3977	0.873238	1.05014	-1.11246	0.997179	0.546344	0	4673.68	38470.3	-3.02112	14.8073
74	1037	Nillson_TopS	1037	1038	NA	-0.546508	0.681229	-0.3254	-0.0224293	1.22403	0.0534063	0.26654	-1.27086	-0.339244	0.525852	1.40144	-0.237385	-0.897583	0	-2471	-25136.9	10.1585	-18.3044
81	1038	Nillson_TopS	1038	1039	NA	1.02206	0.858037	-0.517527	0.02871	1.22728	-0.631586	0.358632	0.121327	-0.0698526	-0.842553	-0.66899	-0.497945	0.0425484	0	NA	NA	3.47305	-13.3053
94	1039	Nillson_TopS	1039	1040	NA	-1.32096	0.649193	0.800677	-0.677424	0.950107	0.179396	0.0265214	-1.77016	0.202721	0.586254	1.95921	0.0312162	-0.655382	0	NA	NA	11.5245	-18.2658
95	1040	Nillson_TopS	1040	1041	NA	-0.851685	-0.135121	1.29966	-0.274074	-0.429962	0.0356426	-0.619918	0.992905	1.07185	0.725885	-0.90353	0.193796	-0.403338	0	13041.5	18743.3	-5.89098	4.66014
91	1041	Nillson_TopS	1041	1042	NA	0.00867564	-0.84219	-0.173283	0.266514	-0.997294	-0.284194	0.331408	0.126683	0.17791	0.178937	0.807632	0.590754	0.162974	0	-7872.66	15798.4	-3.17219	1.32407
81	1042	Nillson_TopS	1042	1043	NA	0.541661	0.523011	-0.454629	0.131869	1.05751	-0.71193	0.487698	0.191894	-0.123228	-0.802034	-0.216347	-0.207201	-0.123096	0	-43693.2	-22316.1	3.47305	-13.3053
74	1043	Nillson_TopS	1043	1044	NA	-0.729769	0.573346	-0.621737	-0.666264	0.980347	0.400162	0.156074	-0.893954	-0.479644	1.02513	1.63027	0.00374799	-0.735959	0	-2181.32	-24728.7	10.1585	-18.3044
71	1044	Nillson_TopS	1044	1045	NA	-1.11147	-0.42641	2.53517	-0.132308	-0.408494	-0.100823	-0.223262	0.494216	0.971476	0.0129404	-0.617507	0.323526	-0.430448	0	12718.5	15003.4	-7.2091	4.52457
87	1045	Nillson_TopS	1045	1046	NA	1.75562	-0.284389	-0.328437	0.245494	0.0421283	-0.207895	-0.434437	0.605916	-0.380334	-0.897435	0.346226	-0.731052	0.736276	0	-51269.8	-30157.3	-2.80321	-1.98428
74	1046	Nillson_TopS	1046	1047	NA	-0.884215	0.900917	-0.247343	-0.228838	1.59564	0.37177	0.579088	-2.01159	-0.0548132	0.923589	1.07496	0.0608479	-0.966333	0	-1319.02	-26645.1	10.1585	-18.3044
90	1047	Nillson_TopS	1047	1048	NA	0.859355	0.0672587	-0.490119	-0.371762	0.407863	-0.606499	0.132397	0.720152	-0.0271991	-0.738559	0.257991	-0.194551	0.241441	0	NA	NA	0.04133	-8.05116
90	1048	Nillson_TopS	1048	1049	NA	1.09145	-0.0682259	-0.216499	-0.146855	0.290399	-0.393788	-0.0753975	0.218096	-0.187652	-0.561397	0.394114	-0.354181	0.183159	0	NA	NA	0.04133	-8.05116
104	1049	Nillson_TopS	1049	1050	NA	-0.53134	-0.27371	0.791115	-0.776194	-1.44436	1.52759	-1.08806	-1.37192	-0.0645983	1.55487	2.35114	0.598815	0.231664	0	49377.6	-17277.2	-1.20331	25.4698
90	1050	Nillson_TopS	1050	1051	NA	1.1912	-0.115579	0.691328	-0.177674	0.1626	-0.444577	-0.201758	0.185567	-0.0974621	-0.891116	0.00354901	-0.326678	0.273222	0	-44220.2	-23352.5	0.04133	-8.05116
81	1051	Nillson_TopS	1051	1052	NA	0.281099	1.23025	-0.814908	-0.578092	1.8946	-0.775493	0.95659	-0.436375	0.383823	-0.609022	-0.0246508	-0.408376	-0.405667	0	NA	NA	3.47305	-13.3053
94	1052	Nillson_TopS	1052	1053	NA	-0.765861	0.921677	-0.672386	-0.643236	1.6123	0.592837	0.655471	-2.32331	0.00259424	1.20385	1.57834	0.170254	-0.601984	0	NA	NA	11.5245	-18.2658
90	1053	Nillson_TopS	1053	1054	NA	1.27412	0.237424	-0.414354	0.318611	0.893373	-0.88608	0.240771	0.61538	0.0650528	-0.97029	-0.284248	-0.660362	0.0481088	0	NA	NA	0.04133	-8.05116
81	1054	Nillson_TopS	1054	1055	NA	0.762841	0.483738	-0.437563	0.0105188	0.927595	-0.524011	0.363993	0.0873528	0.163445	-0.806332	-0.339265	-0.291245	-0.132497	0	NA	NA	3.47305	-13.3053
87	1055	Nillson_TopS	1055	1056	NA	2.18155	-0.56687	-0.230073	0.405479	-0.263876	0.131846	-0.518443	0.622226	-0.730512	-0.725356	0.232213	-0.915572	1.02545	0	NA	NA	-2.80321	-1.98428
94	1056	Nillson_TopS	1056	1057	NA	-1.01531	-0.19185	0.0678984	-0.699985	0.478497	0.870687	-0.184529	-1.95102	-0.321835	1.56467	2.63976	0.46624	-0.38793	0	4734.86	-23050.6	11.5245	-18.2658
73	1057	Nillson_TopS	1057	1058	NA	-1.55167	-1.0418	2.15419	3.9566	-0.260149	-0.321772	-0.428742	-0.286154	-0.260323	0.185482	1.42521	-0.316764	-1.19023	0	-970.935	-1514.95	-4.75949	1.27338
71	1058	Nillson_TopS	1058	1059	NA	-1.38771	-0.475431	3.85287	-0.18504	-0.220412	-0.889749	0.0136405	-0.556161	1.58266	-0.876127	-0.163593	0.593987	0.193526	0	NA	NA	-7.2091	4.52457
94	1059	Nillson_TopS	1059	1060	NA	-0.359438	0.619992	-0.926832	0.0548983	1.11022	0.0113075	0.0547742	0.127596	-0.442633	0.478887	0.873699	-0.250701	-0.94655	0	NA	NA	11.5245	-18.2658
69	1060	Nillson_TopS	1060	1061	NA	-0.254407	0.146624	0.514013	-0.797468	-0.484691	2.10291	-0.692216	-1.87374	0.871786	1.8838	-1.1795	0.919551	0.340353	0	59362.3	-3598.17	-2.63306	16.7582
90	1061	Nillson_TopS	1061	1062	NA	1.158	0.234559	-0.613901	-0.0336404	0.915592	-0.516646	0.260694	0.466184	-0.516793	-0.573863	0.104537	-0.508695	-0.0236598	0	NA	NA	0.04133	-8.05116
96	1062	Nillson_TopS	1062	1063	NA	0.0525226	0.870777	-0.421604	-0.444955	1.43478	-0.589152	0.72747	0.385102	0.0607334	-0.698886	-0.222641	-0.174831	-0.573807	0	-37797.5	-20623.5	5.64891	-15.0421
76	1063	Nillson_TopS	1063	1064	NA	-1.34913	-0.554601	-0.101825	0.143723	-0.994234	0.0819838	0.521441	1.57649	0.370858	0.388394	0.354115	0.50288	-0.269414	0	NA	NA	-3.9653	1.78471
90	1064	Nillson_TopS	1064	1065	NA	0.519864	-0.182742	-0.157724	0.0191194	0.23	-0.53925	0.237629	0.47298	-0.0454801	-0.480305	0.415543	-0.153299	-0.215939	0	-44679.4	-25257.7	0.04133	-8.05116
90	1065	Nillson_TopS	1065	1066	NA	1.58767	0.121015	-0.710008	0.263902	0.425963	-0.330088	0.12896	0.175815	-0.205949	-0.902786	0.0324085	-0.631167	0.430873	0	NA	NA	0.04133	-8.05116
101	1066	Nillson_TopS	1066	1067	NA	1.01183	0.577986	-0.559084	-0.248927	1.17335	-0.529619	0.508723	0.0773792	0.12425	-0.840663	-0.664367	-0.325956	0.0977429	0	NA	NA	1.66122	-10.7159
71	1067	Nillson_TopS	1067	1068	NA	-1.28168	-0.168772	1.9909	-0.175171	-0.507738	-0.235211	-0.547549	1.28628	1.30626	0.263785	-0.928137	0.197625	-0.144579	0	12543.3	17801.8	-7.2091	4.52457
73	1068	Nillson_TopS	1068	1069	NA	-1.42909	-0.450367	2.83673	4.4721	0.113575	0.0683579	-0.121322	0.0520056	-0.164345	0.485643	-1.63408	-0.0637606	-1.4718	0	-2354.8	11016.6	-4.75949	1.27338
103	1069	Nillson_TopS	1069	1070	NA	-0.0440402	0.136579	0.188708	-0.601805	-1.07047	2.23726	-0.846855	-1.89902	-0.656171	2.35969	0.191886	1.09523	0.543115	0	58063	-11850.4	-1.77317	21.6487
88	1070	Nillson_TopS	1070	1071	NA	-0.404303	0.163357	-0.0303453	-0.920415	-1.13088	1.91735	-1.3113	-0.615385	0.0837891	1.46345	1.28444	0.342266	0.220519	0	55748.1	-15588.8	-1.47868	23.5644
86	1071	Nillson_TopS	1071	1072	NA	-0.985485	-0.459629	0.328753	0.447451	-1.07964	0.438821	0.357962	0.299631	0.433956	0.689312	-1.12986	0.887564	0.48185	0	1852.47	37807.4	-4.2936	8.20126
94	1072	Nillson_TopS	1072	1073	NA	-0.907409	0.265609	-0.0748505	-0.138849	0.846094	0.592715	-0.0897546	-1.5737	-0.502645	1.20503	1.78194	0.128198	-0.736682	0	NA	NA	11.5245	-18.2658
81	1073	Nillson_TopS	1073	1074	NA	0.726416	0.628747	-0.717481	-0.381684	1.11528	-0.668122	0.441714	0.162123	-0.0339385	-0.658693	0.219825	-0.30839	-0.15773	0	NA	NA	3.47305	-13.3053
90	1074	Nillson_TopS	1074	1075	NA	0.747596	0.0598316	-0.422559	-0.219772	0.468564	-0.52631	0.083984	1.15503	-0.629778	-0.38221	0.695562	-0.420143	-0.271549	0	NA	NA	0.04133	-8.05116
97	1075	Nillson_TopS	1075	1076	NA	-0.815149	-0.717637	0.550562	-0.570606	-1.42411	1.46706	-1.37219	-0.482048	-0.643085	2.26297	2.63046	0.936544	0.0435884	0	37931.6	-14772.5	-0.640634	29.6106
90	1076	Nillson_TopS	1076	1077	NA	1.56045	0.128587	-0.568515	-0.00748475	0.599421	-0.253665	-0.0974367	0.762172	-0.465055	-0.741022	0.000134966	-0.827508	0.351056	0	NA	NA	0.04133	-8.05116
86	1077	Nillson_TopS	1077	1078	NA	-0.937646	-0.558811	0.755771	0.337981	-1.03401	0.208009	0.393877	1.5503	0.0254441	0.780456	-0.875552	0.509423	-0.324678	0	-4668.43	33466.5	-4.2936	8.20126
90	1078	Nillson_TopS	1078	1079	NA	1.06248	0.318086	-0.690686	-0.27082	0.757698	-0.490341	0.464934	0.160346	0.17031	-0.657672	-0.507013	-0.155212	0.160682	0	NA	NA	0.04133	-8.05116
68	1079	Nillson_TopS	1079	1080	NA	-0.976968	0.173326	1.78699	0.859495	-0.838566	0.181782	-0.761491	-0.0254734	0.409998	0.995762	-0.924829	0.149469	-0.077482	0	NA	NA	-7.16747	12.5824
71	1080	Nillson_TopS	1080	1081	NA	-1.24214	-0.442342	2.70514	-0.285051	-0.356989	-0.562424	-0.0984687	-0.00433153	1.49075	-0.30787	-0.679574	0.515116	0.331898	0	13972.6	13256.4	-7.2091	4.52457
69	1081	Nillson_TopS	1081	1082	NA	-0.474431	0.506971	0.181102	-0.758106	-0.577961	2.02024	-0.575675	-1.89293	1.54883	2.08876	-1.53765	0.825678	0.536185	0	59152.7	-2758.01	-2.63306	16.7582
90	1082	Nillson_TopS	1082	1083	NA	1.12732	-0.104167	-0.771505	-0.224639	0.46655	-0.356009	0.226904	0.839691	-0.147362	-0.580515	0.180382	-0.367036	0.0340058	0	NA	NA	0.04133	-8.05116
90	1083	Nillson_TopS	1083	1084	NA	1.49049	-0.0168896	-0.897512	-0.151649	0.533343	-0.239086	0.0415881	0.400695	-0.554927	-0.64241	0.727239	-0.749163	0.553604	0	NA	NA	0.04133	-8.05116
81	1084	Nillson_TopS	1084	1085	NA	0.557236	0.16916	-0.510553	0.00230215	0.656473	-0.674196	0.236903	1.01954	-0.117952	-0.716913	0.193201	-0.20717	-0.336827	0	NA	NA	3.47305	-13.3053
100	1085	Nillson_TopS	1085	1086	NA	-0.997817	-0.620379	0.146272	-0.669214	-1.31441	1.04447	-0.852742	1.0283	-0.844454	1.79724	2.52074	0.612672	-0.42574	0	28640.5	-13798.6	-0.457409	31.025
72	1086	Nillson_TopS	1086	1087	NA	-0.356875	0.136051	-0.287413	0.734442	0.485866	0.181339	-0.250782	0.152654	-0.844179	0.547	1.04676	-0.397744	-0.819743	0	-7574.75	-19267.6	8.83648	-17.3626
87	1087	Nillson_TopS	1087	1088	NA	1.4612	-0.248828	-0.116893	0.714874	0.103	-0.174123	0.127987	-0.489052	0.085875	-0.979581	-0.888108	0.242577	0.531037	0	NA	NA	-2.80321	-1.98428
78	1088	Nillson_TopS	1088	1089	NA	1.39672	-0.0498956	-0.618732	0.170686	0.424214	-0.439849	0.103755	0.460715	-0.0941182	-0.872757	-0.236021	-0.283009	0.365175	0	-51981.8	-26969.2	-1.47521	-5.09834
85	1089	Nillson_TopS	1089	1090	NA	1.61415	-0.203598	1.36241	0.602179	-0.912304	0.378684	-1.12966	-0.846676	-0.531294	0.834963	-1.00802	0.263099	0.598237	0	26527	19106.9	-6.1752	13.2135
87	1090	Nillson_TopS	1090	1091	NA	1.72595	-0.308104	-0.2696	0.0551227	0.199752	-0.294178	0.0941416	0.425835	-0.29473	-0.880554	-0.382537	-0.336422	0.623855	0	-53277.7	-28649.3	-2.80321	-1.98428
101	1091	Nillson_TopS	1091	1092	NA	0.93502	0.489292	-0.533577	-0.112818	1.05553	-0.588524	0.284734	0.121004	-0.0235615	-0.761284	-0.0154907	-0.580444	0.0498138	0	-44870.4	-23793.5	1.66122	-10.7159
87	1092	Nillson_TopS	1092	1093	NA	1.24311	-0.221605	-0.42653	-0.159945	0.163553	-0.535927	0.192875	0.552801	-0.0138184	-0.878644	0.101	-0.115901	0.36915	0	NA	NA	-2.80321	-1.98428
87	1093	Nillson_TopS	1093	1094	NA	1.99872	-0.0760206	-0.688484	0.613088	0.315008	-0.00903273	-0.263404	0.395276	-0.502723	-0.988587	-0.412451	-0.752191	0.961903	0	NA	NA	-2.80321	-1.98428
102	1094	Nillson_TopS	1094	1095	NA	-1.07293	-0.212493	1.30688	0.985425	-1.19738	0.776743	-0.980958	0.69989	-0.335771	1.32771	-0.628799	0.484875	-0.150383	0	24288.5	16703.8	-5.64805	12.479
88	1095	Nillson_TopS	1095	1096	NA	-0.627325	-0.0875598	0.727371	-1.03072	-1.38014	1.66426	-1.45899	-0.716562	0.347331	1.26031	2.4087	0.25554	0.108532	0	53215.3	-17236.6	-1.47868	23.5644
94	1096	Nillson_TopS	1096	1097	NA	-0.732444	1.55999	-0.599425	-0.475796	2.10527	0.315709	0.951812	-2.63014	0.427838	0.872443	1.30205	0.0594892	-0.952392	0	NA	NA	11.5245	-18.2658
90	1097	Nillson_TopS	1097	1098	NA	0.431171	-0.0801675	1.77961	-0.531426	0.164927	-0.549337	-0.307006	0.227991	0.233658	-0.631429	0.0357764	-0.278972	-0.124199	0	4554.94	6856.57	0.04133	-8.05116
71	1098	Nillson_TopS	1098	1099	NA	-1.4497	1.93794	2.6785	-1.14707	0.924504	0.619847	0.354354	-2.76715	3.9521	0.630635	-2.09543	0.771722	-0.476719	0	24152	5415.3	-7.2091	4.52457
102	1099	Nillson_TopS	1099	1100	NA	-1.17586	-0.386229	0.94584	1.00483	-0.941622	0.573305	-0.698788	0.538779	-0.298945	0.935195	0.406082	0.188627	-0.427627	0	15684.8	13360.6	-5.64805	12.479
94	1100	Nillson_TopS	1100	1101	NA	-0.640072	0.603386	0.231258	-0.630918	0.927118	0.0717414	0.103295	-1.59917	-0.0125892	0.670818	1.5201	-0.0684968	-0.545381	0	NA	NA	11.5245	-18.2658
90	1101	Nillson_TopS	1101	1102	NA	1.37856	-0.0268539	-0.588589	0.0335734	0.443062	-0.353512	0.246366	0.771491	-0.0492804	-1.00307	-0.567112	-0.171617	0.273449	0	NA	NA	0.04133	-8.05116
81	1102	Nillson_TopS	1102	1103	NA	0.51745	0.810535	-0.743677	-0.392499	1.30284	-0.804471	0.668746	0.298317	0.31261	-0.799773	-0.186052	-0.207089	-0.3042	0	NA	NA	3.47305	-13.3053
74	1103	Nillson_TopS	1103	1104	NA	-0.934205	1.20515	-0.42161	-0.330277	1.66392	0.397501	0.560019	-2.06237	-0.223258	0.936544	1.23326	0.0593708	-0.903299	0	-1565.62	-26810.2	10.1585	-18.3044
78	1104	Nillson_TopS	1104	1105	NA	1.6875	-0.399675	-0.541489	0.254515	0.254575	-0.33937	0.188217	-0.00184046	-0.0235039	-0.814786	-0.260343	-0.192348	0.548086	0	NA	NA	-1.47521	-5.09834
87	1105	Nillson_TopS	1105	1106	NA	1.59336	-0.197125	-0.418884	0.177321	0.115442	-0.256623	0.0245022	0.422066	-0.187259	-0.838302	-0.340154	-0.419503	0.655691	0	-53298.2	-28887.9	-2.80321	-1.98428
95	1106	Nillson_TopS	1106	1107	NA	-1.00514	-0.0391023	1.92388	-0.00513667	-0.394039	-0.162279	-0.583272	1.47217	0.486848	0.430333	-0.65768	0.111763	-0.685888	0	10214	20098.7	-5.89098	4.66014
100	1107	Nillson_TopS	1107	1108	NA	-0.983078	-1.01424	1.03287	-0.695533	-1.19383	1.05513	-1.01682	0.357488	-0.737641	1.81416	1.92015	0.715549	0.146961	0	32960.2	-13381.5	-0.457409	31.025
94	1108	Nillson_TopS	1108	1109	NA	-0.227636	0.127331	-0.513132	-0.345333	0.508762	0.303721	-0.299328	-0.0150341	-0.742043	0.90193	1.1476	-0.0224622	-0.527566	0	NA	NA	11.5245	-18.2658
96	1109	Nillson_TopS	1109	1110	NA	-0.152064	0.507369	-0.192867	-0.60939	0.957593	-0.537294	0.654648	1.12669	-0.00271164	-0.509385	-0.245047	-0.208097	-0.442625	0	-35488.2	-19698.9	5.64891	-15.0421
90	1110	Nillson_TopS	1110	1111	NA	1.06559	0.235006	-0.567507	0.215908	0.767046	-0.43406	0.136639	0.856981	-0.255354	-0.790023	-0.237008	-0.746285	0.11068	0	NA	NA	0.04133	-8.05116
96	1111	Nillson_TopS	1111	1112	NA	-0.0138794	0.671802	-0.216628	-0.388338	1.32057	-0.891624	0.603394	0.619286	0.129868	-0.616599	-0.267946	-0.0596958	-0.48575	0	-37352.7	-20617.1	5.64891	-15.0421
90	1112	Nillson_TopS	1112	1113	NA	1.14764	0.269034	-0.319808	-0.199129	0.745723	-0.600459	0.353036	0.61306	-0.071459	-0.835173	-0.590735	-0.304213	0.128968	0	NA	NA	0.04133	-8.05116
81	1113	Nillson_TopS	1113	1114	NA	0.646665	0.654827	-0.507218	-0.290035	1.07525	-0.621719	0.513162	0.234125	0.10639	-0.63658	-0.382731	-0.275336	-0.206552	0	NA	NA	3.47305	-13.3053
83	1114	Nillson_TopS	1114	1115	NA	-0.733094	-0.666713	0.947278	-0.511186	-1.39498	1.40356	-1.15759	-1.30218	-0.30936	2.18287	1.96946	0.981096	0.356827	0	42570.4	-14008.8	-0.90395	27.6653
81	1115	Nillson_TopS	1115	1116	NA	0.572346	0.184993	-0.343136	-0.494929	0.708573	-0.55249	0.168921	0.781855	-0.143331	-0.478579	0.279255	-0.351637	-0.101409	0	NA	NA	3.47305	-13.3053
90	1116	Nillson_TopS	1116	1117	NA	1.41723	-0.0852944	0.065568	0.0652839	0.432191	-0.308976	0.00362094	0.55936	-0.380241	-0.978974	-0.255051	-0.611176	0.400578	0	NA	NA	0.04133	-8.05116
81	1117	Nillson_TopS	1117	1118	NA	0.640532	1.11355	-0.667526	-0.137129	1.63502	-0.584888	0.787294	-0.298994	0.34589	-0.732257	-0.91221	-0.430775	-0.175434	0	NA	NA	3.47305	-13.3053
87	1118	Nillson_TopS	1118	1119	NA	1.67644	-0.157298	-0.672412	0.148068	0.299084	-0.282648	0.107219	0.541987	-0.310432	-0.754838	-0.306399	-0.420524	0.507155	0	NA	NA	-2.80321	-1.98428
90	1119	Nillson_TopS	1119	1120	NA	1.18816	0.022639	-0.405412	-0.188859	0.560157	-0.345663	0.231743	0.424403	0.132515	-0.634443	-0.641392	-0.359827	0.278071	0	NA	NA	0.04133	-8.05116
90	1120	Nillson_TopS	1120	1121	NA	1.1082	0.0974171	-0.725776	0.00745053	0.554659	-0.374989	0.275704	0.554729	-0.275433	-0.668471	0.0381285	-0.514444	0.218773	0	-48619.6	-26368.2	0.04133	-8.05116
90	1121	Nillson_TopS	1121	1122	NA	1.06246	0.293021	-0.709776	0.110409	0.741939	-0.378462	0.367325	0.0816293	-0.0680884	-0.847261	-0.250617	-0.259981	0.156763	0	NA	NA	0.04133	-8.05116
90	1122	Nillson_TopS	1122	1123	NA	0.992324	0.0104134	-0.616635	-0.262602	0.548219	-0.470917	0.318101	0.30416	0.0634161	-0.633401	0.154491	-0.345699	0.193484	0	-46992.4	-26011.3	0.04133	-8.05116
95	1123	Nillson_TopS	1123	1124	NA	-1.28951	-0.0295656	2.02331	-0.54967	-0.198363	-0.495323	-0.213449	1.39679	1.83558	0.165101	-1.32256	0.225116	-0.409938	0	12026.8	17540.4	-5.89098	4.66014
90	1124	Nillson_TopS	1124	1125	NA	1.06366	0.114646	-0.608869	-0.17361	0.494004	-0.393017	0.214593	0.652606	-0.161509	-0.728553	0.145067	-0.440636	0.0992314	0	NA	NA	0.04133	-8.05116
87	1125	Nillson_TopS	1125	1126	NA	1.77462	-0.273676	-0.54679	0.229364	0.330766	-0.23825	0.0758491	0.641165	-0.444213	-0.885507	-0.421421	-0.46224	0.687048	0	NA	NA	-2.80321	-1.98428
101	1126	Nillson_TopS	1126	1127	NA	0.749697	0.401713	-0.732134	-0.190295	0.735399	-0.68709	0.473127	0.369246	0.134109	-0.796589	-0.0796152	-0.104782	0.0325289	0	NA	NA	1.66122	-10.7159
78	1127	Nillson_TopS	1127	1128	NA	1.882	-0.12265	-0.782009	0.212292	0.436943	-0.127683	0.115514	0.0283968	-0.0465586	-0.915044	-0.321371	-0.677277	0.828008	0	-53510	-27297.4	-1.47521	-5.09834
87	1128	Nillson_TopS	1128	1129	NA	1.91069	-0.555265	-0.591574	0.43881	-0.491317	-0.206406	-0.206811	0.829948	-0.426496	-0.925505	0.311701	-0.317098	0.823671	0	NA	NA	-2.80321	-1.98428
104	1129	Nillson_TopS	1129	1130	NA	-0.104611	0.41121	0.0131567	-0.796801	-1.2551	2.37252	-1.37144	-2.09271	-0.587564	2.03954	2.42693	0.709878	0.497828	0	49322.6	-15449.2	-1.20331	25.4698
90	1130	Nillson_TopS	1130	1131	NA	1.24228	0.084838	-0.573336	-0.257987	0.603256	-0.403652	0.32486	0.379999	-0.0456807	-0.746655	-0.506208	-0.197041	0.412797	0	NA	NA	0.04133	-8.05116
94	1131	Nillson_TopS	1131	1132	NA	-0.432548	0.207842	-0.417493	-0.64046	0.633294	0.340286	-0.216444	0.270032	-0.744868	0.822044	1.54038	-0.196735	-0.748244	0	-5138.99	-19909.7	11.5245	-18.2658
95	1132	Nillson_TopS	1132	1133	NA	-1.13335	-0.116716	1.37342	-0.236505	-0.360675	-0.207913	-0.0635323	0.92002	1.49399	0.22395	-1.16889	0.241608	-0.148983	0	12726.1	17999	-5.89098	4.66014
101	1133	Nillson_TopS	1133	1134	NA	0.756448	0.424795	-0.619445	-0.118805	1.0772	-0.553756	0.399311	-0.103437	0.167235	-0.762631	0.132595	-0.392312	-0.101511	0	NA	NA	1.66122	-10.7159
81	1134	Nillson_TopS	1134	1135	NA	0.775767	0.394415	-0.734363	-0.320147	0.988867	-0.583273	0.526687	0.449515	0.127983	-0.690837	-0.144988	-0.273175	-0.17584	0	NA	NA	3.47305	-13.3053
101	1135	Nillson_TopS	1135	1136	NA	1.0243	0.243612	-0.727956	-0.00227757	0.685482	-0.586345	0.4097	0.616522	0.0228548	-0.885637	-0.502827	-0.191141	0.251129	0	-47482.5	-24564.3	1.66122	-10.7159
98	1136	Nillson_TopS	1136	1137	NA	-1.39498	-0.0793312	1.51366	2.6154	-0.612732	0.467273	-0.888634	-1.21467	-0.339985	1.06968	0.470074	0.166304	-0.576732	0	25039.7	7479.97	11.8224	-20.6652
74	1137	Nillson_TopS	1137	1138	NA	-0.958135	0.67605	-0.204369	-0.376479	1.19101	0.449322	0.280186	-1.46346	-0.443299	0.918543	1.52089	-0.00855914	-0.857302	0	-235.465	-25676.2	10.1585	-18.3044
90	1138	Nillson_TopS	1138	1139	NA	0.906648	0.0350871	-0.628962	-0.322333	0.566964	-0.50858	0.377018	0.381261	0.0877364	-0.674116	0.446037	-0.31039	-0.0841083	0	-44693.6	-25550	0.04133	-8.05116
89	1139	Nillson_TopS	1139	1140	NA	-1.15878	0.0335099	0.39719	1.04901	0.536227	0.367921	-0.162608	-1.56073	-0.714653	1.03302	1.85978	0.0463864	-0.795375	0	-934.537	-21654.7	11.2514	-19.9456
87	1140	Nillson_TopS	1140	1141	NA	1.47423	-0.251123	-0.570617	0.513039	0.228428	-0.245407	0.00564045	0.432068	-0.183105	-0.833115	-0.348757	-0.428284	0.570609	0	NA	NA	-2.80321	-1.98428
88	1141	Nillson_TopS	1141	1142	NA	-0.416952	0.187874	0.0256753	-0.79812	-1.24941	1.86251	-1.1507	-1.16352	0.0936325	1.18895	2.27296	0.0808818	0.34602	0	53975.6	-17314.2	-1.47868	23.5644
94	1142	Nillson_TopS	1142	1143	NA	-0.920798	0.60602	-0.390638	-0.510236	1.28337	0.612428	0.325902	-1.48463	0.102486	1.07143	0.548357	0.12155	-0.618963	0	-1233.89	-26975.9	11.5245	-18.2658
78	1143	Nillson_TopS	1143	1144	NA	1.20336	-0.245705	-0.409109	0.293453	-0.0686638	-0.419486	0.27696	-0.024735	0.288895	-0.906657	-0.313193	0.374408	0.194865	0	-51232.3	-25798.7	-1.47521	-5.09834
101	1144	Nillson_TopS	1144	1145	NA	0.700116	0.0224122	-0.550929	0.313671	0.662504	-0.682821	0.188219	0.438914	-0.115395	-0.593843	0.418529	-0.366735	-0.179498	0	NA	NA	1.66122	-10.7159
76	1145	Nillson_TopS	1145	1146	NA	-1.53551	-0.488628	1.66284	0.215415	-1.0951	-0.205468	0.13058	1.95053	0.209023	0.226165	0.683861	0.2894	-0.877722	0	-4819.99	24211.3	-3.9653	1.78471
78	1146	Nillson_TopS	1146	1147	NA	1.61502	-0.00245026	-0.981283	0.0992773	0.554463	-0.248	0.280338	-0.189437	0.10596	-0.973007	-0.257738	-0.210665	0.685573	0	-52643	-26225.1	-1.47521	-5.09834
95	1147	Nillson_TopS	1147	1148	NA	-0.883939	-0.0567904	1.63193	-0.0721847	-0.424798	-0.212183	-0.327288	0.664979	1.73828	0.106932	-1.05799	0.000162753	-0.318188	0	13067.8	17165.9	-5.89098	4.66014
81	1148	Nillson_TopS	1148	1149	NA	0.638075	0.365913	-0.657822	-0.37552	0.857744	-0.54091	0.315156	0.318451	0.0441204	-0.613241	0.333499	-0.179053	-0.230648	0	NA	NA	3.47305	-13.3053
90	1149	Nillson_TopS	1149	1150	NA	0.698101	0.0122025	-0.641665	0.261122	0.517092	-0.376274	0.0551355	0.6498	-0.13064	-0.450235	0.205688	-0.428557	-0.165559	0	NA	NA	0.04133	-8.05116
87	1150	Nillson_TopS	1150	1151	NA	1.7267	-0.181978	-0.707453	0.21336	0.148287	-0.346579	0.0125389	0.452323	-0.348599	-0.891331	-0.00913899	-0.288686	0.632488	0	NA	NA	-2.80321	-1.98428
90	1151	Nillson_TopS	1151	1152	NA	1.22723	0.162959	-0.606245	0.642814	0.624233	-0.426242	0.224335	0.156538	-0.192671	-1.02663	-0.326803	-0.386687	0.301604	0	NA	NA	0.04133	-8.05116
90	1152	Nillson_TopS	1152	1153	NA	0.938334	0.137046	-0.369173	-0.0796873	0.554393	-0.555106	0.0553225	0.419618	-0.248434	-0.402724	0.426158	-0.633982	-0.00502195	0	NA	NA	0.04133	-8.05116
86	1153	Nillson_TopS	1153	1154	NA	-1.21897	-0.34332	0.636312	0.235413	-0.934681	0.0245905	0.319765	0.858159	0.643679	0.786115	-0.882535	0.660352	-0.0765235	0	-2223.33	35716.5	-4.2936	8.20126
90	1154	Nillson_TopS	1154	1155	NA	1.73759	0.272233	-0.434728	0.237739	0.62454	-0.276489	-0.0130934	0.762794	-0.436317	-0.980266	-0.54703	-0.96381	0.576126	0	NA	NA	0.04133	-8.05116
81	1155	Nillson_TopS	1155	1156	NA	0.739669	0.576411	-0.518666	-0.352668	1.06417	-0.589298	0.412222	0.379401	0.0644808	-0.804163	-0.000583094	-0.40896	-0.222124	0	NA	NA	3.47305	-13.3053
92	1156	Nillson_TopS	1156	1157	NA	0.26118	1.1318	-0.533748	-0.278545	1.59411	-0.777946	0.655014	0.281137	0.192921	-0.662043	-0.2058	-0.672422	-0.464853	0	-38260.9	-20552.6	2.70687	-14.5254
90	1157	Nillson_TopS	1157	1158	NA	1.28816	0.306894	-0.693308	0.17686	0.750217	-0.409594	0.0847177	0.0480542	-0.160208	-0.85686	-0.132544	-0.344186	0.255681	0	NA	NA	0.04133	-8.05116
105	1158	Nillson_TopS	1158	1159	NA	0.838484	-0.903511	0.289577	-1.07645	-1.31351	2.26226	-0.704036	-0.256143	0.311195	0.109165	-2.16459	1.22934	3.88672	0	12551.6	8577.66	-2.02318	19.8485
90	1159	Nillson_TopS	1159	1160	NA	1.32578	0.221879	-0.322196	0.365196	0.803506	-0.499968	0.328544	0.482589	-0.281521	-0.952947	-0.8697	-0.455459	0.28951	0	NA	NA	0.04133	-8.05116
95	1160	Nillson_TopS	1160	1161	NA	-1.08737	-0.0563573	1.51937	-0.391068	0.0656451	-0.336122	-0.255581	0.880214	1.29762	0.0529349	-0.438671	0.00837644	-0.625391	0	12059.9	17375.4	-5.89098	4.66014
96	1161	Nillson_TopS	1161	1162	NA	-0.0178825	1.16135	-0.573736	-0.362866	1.61619	-0.78071	0.81031	0.433341	0.160495	-0.605201	-0.0958853	-0.557771	-0.649067	0	-37156.7	-20541.8	5.64891	-15.0421
100	1162	Nillson_TopS	1162	1163	NA	-0.838555	-0.828207	0.192987	-0.626025	-1.25246	1.19533	-1.21131	0.178724	-0.528505	1.8999	2.60902	0.562089	0.057905	0	33447.5	-14719	-0.457409	31.025
68	1163	Nillson_TopS	1163	1164	NA	-0.189607	0.23941	1.64727	0.494339	-0.734027	0.468732	-0.978808	-0.678095	-0.085612	0.890585	-0.691043	0.420831	-0.0601576	0	29462.1	20474.8	-7.16747	12.5824
89	1164	Nillson_TopS	1164	1165	NA	-1.05922	0.60446	-0.0691007	0.589458	0.973823	0.440433	0.172262	-1.89898	-0.30443	0.945583	1.29802	0.0762836	-0.838611	0	-1589.34	-23893	11.2514	-19.9456
103	1165	Nillson_TopS	1165	1166	NA	0.0382079	0.0189307	-0.531292	-0.463323	-0.948175	2.36233	-0.973736	-1.72125	-0.579466	2.59167	-0.0450972	1.27908	0.744243	0	59959.1	-11558.9	-1.77317	21.6487
81	1166	Nillson_TopS	1166	1167	NA	1.01421	0.838986	-0.574324	0.181215	1.32964	-0.526707	0.522359	-0.0239882	0.0818337	-1.01089	-0.82356	-0.633892	0.133914	0	NA	NA	3.47305	-13.3053
81	1167	Nillson_TopS	1167	1168	NA	0.729895	0.194153	-0.386963	-0.0547226	0.851255	-0.751544	0.353806	0.541048	0.12104	-0.799706	0.0018127	-0.382717	-0.122457	0	-43575	-23742.4	3.47305	-13.3053
87	1168	Nillson_TopS	1168	1169	NA	2.10789	-0.0199306	-1.31938	0.618733	0.587278	-0.067166	-0.0720842	0.663014	-0.634657	-0.980425	-0.23978	-0.648434	0.961427	0	NA	NA	-2.80321	-1.98428
71	1169	Nillson_TopS	1169	1170	NA	-1.00327	-0.340543	3.28623	-0.284075	-0.386114	-0.783111	-0.214979	0.00551133	1.33988	-0.707498	-0.548885	0.585048	0.247854	0	13536	11753.6	-7.2091	4.52457
90	1170	Nillson_TopS	1170	1171	NA	1.47361	0.203366	-0.528418	0.252221	0.73717	-0.388602	0.0505608	0.671896	-0.3694	-1.01231	-0.174248	-0.792476	0.320973	0	NA	NA	0.04133	-8.05116
90	1171	Nillson_TopS	1171	1172	NA	1.33439	0.0815862	-0.304274	-0.273593	0.428852	-0.490194	0.301197	0.536865	-0.262931	-0.707885	-0.238856	-0.4514	0.340896	0	NA	NA	0.04133	-8.05116
90	1172	Nillson_TopS	1172	1173	NA	1.80865	-0.36303	-0.675058	0.117814	0.198094	-0.234685	-0.191615	0.9348	-0.491598	-0.794349	0.24246	-0.696685	0.665233	0	NA	NA	0.04133	-8.05116
101	1173	Nillson_TopS	1173	1174	NA	1.06587	0.36387	-0.788807	-0.216767	1.14062	-0.520741	0.497889	0.404436	0.0669655	-0.835457	-0.732953	-0.138085	0.172318	0	NA	NA	1.66122	-10.7159
87	1174	Nillson_TopS	1174	1175	NA	1.63556	-0.292637	-0.673831	0.429178	0.147121	-0.174574	-0.11321	0.0537329	-0.246424	-0.882781	0.154639	-0.343943	0.677348	0	-53287.3	-29317.6	-2.80321	-1.98428
90	1175	Nillson_TopS	1175	1176	NA	1.297	0.311593	-0.54696	0.287963	0.671372	-0.320631	0.155676	0.325904	-0.112219	-1.04856	-0.565672	-0.412774	0.325231	0	NA	NA	0.04133	-8.05116
72	1176	Nillson_TopS	1176	1177	NA	-0.687229	0.297833	-0.262784	0.267573	0.698403	0.153967	-0.146616	0.17444	-0.755562	0.625906	1.21271	-0.274141	-0.953353	0	-6890.64	-20595.1	8.83648	-17.3626
81	1177	Nillson_TopS	1177	1178	NA	0.828641	0.7497	-0.658868	-0.266143	1.31486	-0.680242	0.623393	0.423928	0.078998	-0.778059	-0.523151	-0.48856	-0.148225	0	-43323.2	-22192.1	3.47305	-13.3053
80	1178	Nillson_TopS	1178	1179	NA	-1.07961	-0.354841	1.20087	0.745328	-0.800264	0.236575	0.222566	0.0836751	0.155189	0.821387	-1.01914	0.572164	-0.06134	0	251.876	36670.2	-4.13488	11.909
81	1179	Nillson_TopS	1179	1180	NA	0.381228	0.382347	-0.371036	-0.285813	0.712427	-0.579045	0.469199	0.021746	0.111196	-0.723927	0.370129	-0.172851	-0.105304	0	NA	NA	3.47305	-13.3053
87	1180	Nillson_TopS	1180	1181	NA	1.2004	-0.28818	-0.315897	-0.0136776	0.163454	-0.450566	0.271754	0.27967	-0.0781996	-0.905431	0.155744	-0.00979071	0.228339	0	NA	NA	-2.80321	-1.98428
101	1181	Nillson_TopS	1181	1182	NA	1.0906	0.451833	-0.677517	0.039813	0.88749	-0.463378	0.34602	-0.142496	0.0924209	-0.891652	-0.275371	-0.266296	0.14119	0	NA	NA	1.66122	-10.7159
79	1182	Nillson_TopS	1182	1183	NA	0.00816198	0.374673	0.60348	-0.546784	-0.950264	2.40208	-1.13548	-1.71086	-0.270395	2.40151	-1.22083	1.12133	0.799315	0	62188.1	-9421.64	-2.18619	19.1368
90	1183	Nillson_TopS	1183	1184	NA	0.978402	-0.415981	-0.310387	0.324978	0.250354	-0.438768	-0.09521	0.948411	-0.142778	-0.705671	0.278339	-0.577159	0.182809	0	-49396.7	-28139	0.04133	-8.05116
90	1184	Nillson_TopS	1184	1185	NA	1.02933	0.470006	-0.855585	0.256796	0.833772	-0.567273	0.348784	0.331333	-0.163034	-0.789833	-0.041786	-0.496187	0.0365598	0	NA	NA	0.04133	-8.05116
90	1185	Nillson_TopS	1185	1186	NA	1.52851	0.281927	-0.739581	-0.0629989	0.915448	-0.29263	0.395688	0.492577	0.0065927	-1.06858	-0.835019	-0.418483	0.344903	0	NA	NA	0.04133	-8.05116
81	1186	Nillson_TopS	1186	1187	NA	0.438812	0.625901	-0.855498	-0.0810945	1.13928	-0.752571	0.592088	0.433258	0.41802	-0.793926	-0.431505	-0.205513	-0.0895973	0	NA	NA	3.47305	-13.3053
101	1187	Nillson_TopS	1187	1188	NA	0.73012	0.536189	-0.547661	-0.381438	1.06131	-0.557009	0.316273	0.431607	-0.0581561	-0.705676	-0.182296	-0.385762	0.0572722	0	NA	NA	1.66122	-10.7159
101	1188	Nillson_TopS	1188	1189	NA	0.849462	0.444984	-0.33327	-0.354131	0.868801	-0.563744	0.385102	0.112698	0.136018	-0.757351	-0.0754079	-0.381397	-0.0630337	0	NA	NA	1.66122	-10.7159
96	1189	Nillson_TopS	1189	1190	NA	0.102175	0.628326	-0.565085	-0.391923	1.2553	-0.620103	0.633825	0.495838	0.2493	-0.533855	-0.0316265	-0.210279	-0.642513	0	-37038.8	-21098.9	5.64891	-15.0421
101	1190	Nillson_TopS	1190	1191	NA	0.791554	0.469969	-0.842172	0.177325	0.834009	-0.558071	0.27105	0.268172	0.0182244	-0.848282	0.0818713	-0.364958	0.00346007	0	-45147.2	-24132.2	1.66122	-10.7159
90	1191	Nillson_TopS	1191	1192	NA	1.56681	0.282695	-0.787012	0.124249	0.726369	-0.385646	0.229786	-0.14313	-0.0989	-0.967887	-0.184412	-0.412984	0.469523	0	NA	NA	0.04133	-8.05116
105	1192	Nillson_TopS	1192	1193	NA	0.390953	-0.860718	0.726997	-0.444358	-1.32859	1.7737	-0.843868	-1.06474	-0.34338	0.806086	-1.29881	0.862952	3.18801	0	15778	9751.25	-2.02318	19.8485
103	1193	Nillson_TopS	1193	1194	NA	-0.363488	-0.0321875	0.832087	-0.591986	-0.980893	2.08257	-0.942507	-1.88893	-0.271932	2.14408	0.163694	0.822489	0.495009	0	56653.9	-11637.3	-1.77317	21.6487
101	1194	Nillson_TopS	1194	1195	NA	0.850901	0.524787	-0.535031	0.0562989	0.975395	-0.43012	0.54513	0.0897611	0.155714	-0.840668	-0.92806	-0.182676	0.103984	0	-46912.3	-22678.1	1.66122	-10.7159
90	1195	Nillson_TopS	1195	1196	NA	1.37037	0.327587	-0.504943	-0.108029	0.847853	-0.245211	0.241652	-0.176173	-0.121687	-0.810655	-0.484741	-0.494416	0.503621	0	NA	NA	0.04133	-8.05116
74	1196	Nillson_TopS	1196	1197	NA	-0.942561	0.720862	-0.301126	-0.0710228	1.30658	0.477436	0.317636	-1.85767	-0.16513	1.08138	0.972377	0.0442348	-0.719384	0	-1118.89	-26342.7	10.1585	-18.3044
90	1197	Nillson_TopS	1197	1198	NA	1.07505	0.0297932	-0.253557	0.134792	0.534419	-0.515588	0.217696	0.745384	-0.0833313	-0.814273	-0.506169	-0.410971	0.134834	0	NA	NA	0.04133	-8.05116
90	1198	Nillson_TopS	1198	1199	NA	1.15076	0.280617	-0.606519	0.192145	0.716415	-0.475961	0.199827	0.675611	-0.318752	-0.930101	-0.152543	-0.599181	0.246388	0	NA	NA	0.04133	-8.05116
90	1199	Nillson_TopS	1199	1200	NA	1.26426	0.0985315	-0.976869	-0.0267699	0.701776	-0.412381	0.329521	0.488548	-0.152683	-0.898399	-0.0030168	-0.345585	0.36201	0	NA	NA	0.04133	-8.05116
95	1200	Nillson_TopS	1200	1201	NA	-0.751177	-0.104553	1.37156	0.475722	0.216308	-0.56948	-0.110605	0.564813	1.19519	-0.317465	-0.767964	-0.0261449	-0.509212	0	12255.7	15856.5	-5.89098	4.66014
87	1201	Nillson_TopS	1201	1202	NA	1.52583	-0.194279	-0.624897	0.117754	0.230172	-0.238495	0.245773	0.329691	-0.00219267	-0.844139	-0.53953	-0.0902462	0.410962	0	NA	NA	-2.80321	-1.98428
81	1202	Nillson_TopS	1202	1203	NA	0.441077	0.293458	-0.319507	-0.285323	0.783596	-0.420599	0.401761	0.471473	-0.279186	-0.421299	0.274515	-0.263683	-0.481242	0	NA	NA	3.47305	-13.3053
76	1203	Nillson_TopS	1203	1204	NA	-1.46912	-0.778427	-0.0224805	1.2053	-0.861111	-0.138276	0.442142	0.88786	0.45384	0.306582	0.546046	0.718583	-0.528587	0	-5846.2	25855.1	-3.9653	1.78471
90	1204	Nillson_TopS	1204	1205	NA	0.891973	0.259332	-0.465063	-0.241197	0.756167	-0.467119	0.335415	0.419638	-0.0980041	-0.559272	-0.389271	-0.331921	0.139537	0	NA	NA	0.04133	-8.05116
90	1205	Nillson_TopS	1205	1206	NA	1.4348	-0.0640105	-0.679958	-0.239779	0.287371	-0.485535	0.208276	0.554271	-0.219781	-0.763637	0.165321	-0.283579	0.419632	0	NA	NA	0.04133	-8.05116
85	1206	Nillson_TopS	1206	1207	NA	1.75131	-0.131579	0.851552	0.649379	-0.239251	0.228414	-0.84255	-0.558535	-0.317531	0.132219	-1.07403	-0.29665	0.618518	0	25982.6	18982.3	-6.1752	13.2135
80	1207	Nillson_TopS	1207	1208	NA	-1.09309	-0.63408	0.539353	0.71743	-0.918338	0.471383	0.649607	0.0182688	0.349581	0.641289	-0.877617	0.66155	0.12682	0	NA	NA	-4.13488	11.909
90	1208	Nillson_TopS	1208	1209	NA	1.56021	-0.0457255	-0.491412	0.129216	0.604672	-0.408742	0.301407	0.404158	-0.132734	-1.09148	-0.494042	-0.373536	0.465904	0	NA	NA	0.04133	-8.05116
81	1209	Nillson_TopS	1209	1210	NA	0.152237	0.525995	-0.392027	0.504062	1.08854	-0.588688	0.291878	0.745982	-0.376089	-0.289905	0.270133	-0.859919	-0.682068	0	NA	NA	3.47305	-13.3053
75	1210	Nillson_TopS	1210	1211	NA	1.22827	-0.812529	-0.45182	0.398172	-1.14025	-0.180637	-0.0370432	1.6361	-0.208731	-0.388139	-0.0188512	0.0747676	0.516732	0	-17455.3	3935.97	-3.41715	-0.207763
90	1211	Nillson_TopS	1211	1212	NA	1.07224	0.0298018	-0.304916	-0.203685	0.499812	-0.563535	0.0376037	0.536022	-0.168109	-0.805571	0.355571	-0.308929	0.0930244	0	-47438.1	-26588	0.04133	-8.05116
90	1212	Nillson_TopS	1212	1213	NA	0.966689	-0.0733609	-0.117968	-0.347563	0.456951	-0.541098	0.189781	1.12059	-0.270627	-0.71814	-0.288988	-0.174238	0.0773985	0	NA	NA	0.04133	-8.05116
71	1213	Nillson_TopS	1213	1214	NA	-1.13189	-0.416464	2.96623	-0.168492	-0.483433	-0.630503	-0.0331104	0.0374138	1.52597	-0.593413	-0.6154	0.546512	0.186622	0	13905.1	12550.7	-7.2091	4.52457
101	1214	Nillson_TopS	1214	1215	NA	0.698794	0.280571	-0.448908	-0.25296	0.727005	-0.554952	0.207042	0.471954	-0.12914	-0.688858	0.300705	-0.455466	0.0770816	0	NA	NA	1.66122	-10.7159
81	1215	Nillson_TopS	1215	1216	NA	0.933427	0.623429	-0.762805	-0.103006	1.19189	-0.542208	0.484907	0.0499067	0.112991	-0.635039	-0.354667	-0.43218	-0.181388	0	NA	NA	3.47305	-13.3053
81	1216	Nillson_TopS	1216	1217	NA	0.47959	0.363578	-0.606993	-0.287507	0.826541	-0.522599	0.26532	0.49487	-0.0314363	-0.566519	0.197602	-0.171808	-0.196094	0	NA	NA	3.47305	-13.3053
71	1217	Nillson_TopS	1217	1218	NA	-1.12014	-0.111069	2.48856	-0.281476	-0.336791	-0.665088	-0.166492	0.444449	1.41402	-0.530583	-0.483845	0.329333	-0.00257926	0	13178.4	13917.1	-7.2091	4.52457
90	1218	Nillson_TopS	1218	1219	NA	1.30509	0.082161	-0.46789	-0.262259	0.641279	-0.212862	0.00176856	-0.0341435	-0.568971	-0.421959	0.277535	-0.44783	0.377184	0	NA	NA	0.04133	-8.05116
90	1219	Nillson_TopS	1219	1220	NA	0.853013	0.244169	-0.306896	-0.0866942	0.796311	-0.661324	0.103101	0.818848	-0.305675	-0.42738	0.132359	-0.630803	-0.240906	0	NA	NA	0.04133	-8.05116
78	1220	Nillson_TopS	1220	1221	NA	1.43253	0.107051	-0.437855	0.580625	0.646058	-0.383805	0.183171	0.155554	-0.116046	-1.02396	-0.559262	-0.533943	0.353288	0	-51536.9	-25017.6	-1.47521	-5.09834
81	1221	Nillson_TopS	1221	1222	NA	0.416063	0.574455	-0.415995	-0.419846	1.20592	-0.6301	0.497176	0.72195	-0.203308	-0.677193	0.21846	-0.704949	-0.210032	0	NA	NA	3.47305	-13.3053
69	1222	Nillson_TopS	1222	1223	NA	0.035612	0.358347	0.417704	-0.492726	-0.836236	2.43073	-1.18124	-1.99356	0.597167	2.2467	-1.22638	0.945731	0.712305	0	59949.8	-5187.85	-2.63306	16.7582
71	1223	Nillson_TopS	1223	1224	NA	-1.38064	-0.15486	3.094	-0.246116	-0.388201	-0.686628	-0.51437	0.487806	1.59705	-0.587542	-0.404655	0.318162	0.105706	0	13275.1	13663.8	-7.2091	4.52457
90	1224	Nillson_TopS	1224	1225	NA	1.00543	0.150023	-0.837565	-0.198645	0.684397	-0.430926	0.272319	0.417984	-0.13079	-0.732507	0.236002	-0.159242	0.0254915	0	NA	NA	0.04133	-8.05116
93	1225	Nillson_TopS	1225	1226	NA	-1.35168	-0.260967	0.610286	7.28e-05	-0.887325	-0.319376	0.940204	2.16377	0.872337	0.252896	-1.54911	0.994679	-0.205784	0	-3639.79	30333.7	-4.40299	4.80104
94	1226	Nillson_TopS	1226	1227	NA	-0.976292	0.627456	0.0540647	-0.839596	1.08078	0.592658	0.235551	-2.52595	-0.258815	1.20328	3.24268	0.260998	-0.646996	0	NA	NA	11.5245	-18.2658
81	1227	Nillson_TopS	1227	1228	NA	0.465149	0.37053	-0.113776	-0.231523	0.748852	-0.656328	0.406961	0.253999	0.0465898	-0.661592	0.124886	-0.263846	-0.294836	0	-40440.5	-22405.1	3.47305	-13.3053
87	1228	Nillson_TopS	1228	1229	NA	1.55174	-0.125513	-0.547686	0.616744	0.282748	-0.246845	-0.148241	0.539688	-0.522285	-1.03109	0.416566	-0.839388	0.526889	0	NA	NA	-2.80321	-1.98428
86	1229	Nillson_TopS	1229	1230	NA	-1.19593	-0.427835	0.453549	0.0185148	-0.736701	0.409033	0.451584	0.60336	0.535351	0.986296	-1.28793	0.73949	0.262143	0	141.566	37462.5	-4.2936	8.20126
90	1230	Nillson_TopS	1230	1231	NA	1.31524	0.157193	-0.572877	0.300496	0.740331	-0.42847	0.191339	0.669499	-0.283865	-1.16718	-0.363382	-0.477415	0.373624	0	NA	NA	0.04133	-8.05116
71	1231	Nillson_TopS	1231	1232	NA	-1.10526	-0.291614	2.6269	-0.351731	-0.292868	-0.513342	-0.147258	0.633439	1.42743	-0.00885885	-0.88568	0.234226	-0.323496	0	NA	NA	-7.2091	4.52457
95	1232	Nillson_TopS	1232	1233	NA	-0.55509	0.0331723	1.41765	-0.342604	-0.0939154	-0.122564	-0.336538	0.511987	1.47437	0.167745	-1.15496	-0.154952	-0.193033	0	13187.5	17320.2	-5.89098	4.66014
86	1233	Nillson_TopS	1233	1234	NA	-1.212	-0.422243	0.783017	0.854237	-0.949681	0.275933	0.359383	0.655876	0.196138	0.789679	-0.861368	0.666551	-0.35913	0	-1723.83	35941.7	-4.2936	8.20126
90	1234	Nillson_TopS	1234	1235	NA	1.47566	0.582299	-0.708147	0.137924	0.979307	-0.384729	0.424523	0.38929	0.0331959	-1.04734	-1.28727	-0.410466	0.46374	0	NA	NA	0.04133	-8.05116
87	1235	Nillson_TopS	1235	1236	NA	1.87952	-0.0981147	-0.59005	0.376949	0.279361	-0.250673	-0.109059	0.477848	-0.372714	-0.797385	-0.3586	-0.722877	0.761206	0	NA	NA	-2.80321	-1.98428
87	1236	Nillson_TopS	1236	1237	NA	1.55941	-0.0287401	-0.491407	0.210801	0.336812	-0.26996	0.139274	0.487189	-0.211643	-1.17091	-0.553759	-0.312252	0.735424	0	NA	NA	-2.80321	-1.98428
90	1237	Nillson_TopS	1237	1238	NA	0.971843	0.379006	-0.973308	-0.121519	0.976293	-0.601011	0.374484	0.222764	0.00123716	-0.878285	0.0582682	-0.181902	0.203427	0	NA	NA	0.04133	-8.05116
102	1238	Nillson_TopS	1238	1239	NA	-0.957513	-0.457024	1.50007	0.31925	-0.972393	0.836887	-0.842007	-0.401897	0.233813	1.47353	-0.348337	0.583998	-0.213219	0	NA	NA	-5.64805	12.479
78	1239	Nillson_TopS	1239	1240	NA	1.78164	-0.0440746	-0.883478	0.328447	0.371049	-0.237415	0.15026	-0.0354556	-0.227667	-0.888479	-0.296666	-0.246806	0.699807	0	-53935.3	-26869.7	-1.47521	-5.09834
94	1240	Nillson_TopS	1240	1241	NA	-0.90506	0.873008	0.112974	-0.733476	1.22223	0.586282	0.404375	-2.38545	0.0673039	1.10021	1.85817	0.0637112	-0.718069	0	NA	NA	11.5245	-18.2658
96	1241	Nillson_TopS	1241	1242	NA	-0.185518	0.79426	-0.417005	-0.401902	1.30751	-0.732956	0.664977	0.555064	0.327908	-0.556349	-0.102375	-0.244098	-0.600417	0	-36255.8	-20341.4	5.64891	-15.0421
87	1242	Nillson_TopS	1242	1243	NA	1.54147	-0.208393	-0.644596	-0.11257	0.181416	-0.249674	0.182749	0.784988	-0.337598	-0.719827	-0.272688	-0.24831	0.451835	0	-51881.6	-28411.7	-2.80321	-1.98428
87	1243	Nillson_TopS	1243	1244	NA	1.88093	-0.418474	-0.26421	0.279098	0.158323	-0.112779	-0.173342	0.609115	-0.685302	-0.905705	0.126622	-0.774456	0.786922	0	-51993.6	-30345.4	-2.80321	-1.98428
94	1244	Nillson_TopS	1244	1245	NA	-0.990978	0.864992	-0.0541471	-0.808051	1.33692	0.473124	0.453114	-2.46097	-0.0840597	1.00049	2.56872	0.207662	-0.811286	0	3010.47	-25816.4	11.5245	-18.2658
101	1245	Nillson_TopS	1245	1246	NA	0.909407	0.860761	-0.563	0.0793289	1.22695	-0.459367	0.440561	-0.241789	0.127191	-0.978889	-0.59375	-0.456671	0.0497457	0	-45181.1	-22175.2	1.66122	-10.7159
68	1246	Nillson_TopS	1246	1247	NA	-0.85483	0.116651	1.8642	0.664579	-0.560072	0.274287	-0.591341	0.892424	-0.501775	0.530368	-0.574366	0.0198166	-0.442197	0	NA	NA	-7.16747	12.5824
94	1247	Nillson_TopS	1247	1248	NA	-1.08816	0.55366	-0.602673	-0.530476	0.945665	0.591367	-0.142328	-1.07246	-0.46783	1.17898	1.73831	0.212214	-0.589523	0	NA	NA	11.5245	-18.2658
90	1248	Nillson_TopS	1248	1249	NA	1.77557	0.326236	-0.849553	0.249082	0.72842	-0.146133	0.0614303	0.597884	-0.455199	-1.00406	-0.389693	-0.899753	0.613808	0	-51650.4	-26831.3	0.04133	-8.05116
88	1249	Nillson_TopS	1249	1250	NA	-0.56337	0.189674	-0.22865	-0.872474	-1.32319	1.8273	-1.36922	-0.769758	0.529256	1.45265	1.97772	0.243772	0.236042	0	54769.4	-16870.5	-1.47868	23.5644
90	1250	Nillson_TopS	1250	1251	NA	1.07027	0.337847	-0.255841	-0.0138269	0.747842	-0.30281	0.0188195	0.0352393	-0.294575	-0.863241	0.268599	-0.583448	0.0909628	0	NA	NA	0.04133	-8.05116
69	1251	Nillson_TopS	1251	1252	NA	-0.339984	0.267721	1.01653	-0.554022	-0.910979	2.0141	-0.704458	-2.00363	1.00785	1.93312	-1.44176	0.847184	0.843996	0	57018.9	-2508.34	-2.63306	16.7582
96	1252	Nillson_TopS	1252	1253	NA	0.346186	0.490601	-0.406093	-0.533704	0.997943	-0.560029	0.549652	0.534121	-0.00583216	-0.533081	0.17349	-0.222079	-0.534352	0	-38267.2	-22245.9	5.64891	-15.0421
90	1253	Nillson_TopS	1253	1254	NA	1.32212	0.121886	-0.633223	-0.125245	0.717918	-0.464858	0.257066	0.920851	-0.287656	-0.629514	-0.481213	-0.626601	0.326914	0	NA	NA	0.04133	-8.05116
71	1254	Nillson_TopS	1254	1255	NA	-1.32854	-0.516211	3.49503	-0.240453	-0.468778	-0.875952	-0.00461597	-0.069909	1.57569	-0.744078	-0.60864	0.821341	0.375869	0	14059.5	11944.6	-7.2091	4.52457
69	1255	Nillson_TopS	1255	1256	NA	-0.277324	0.613216	0.33655	-0.627953	-0.767065	2.16212	-0.570673	-2.15823	1.18317	1.88664	-1.37449	0.891053	0.56956	0	59229.6	-2928.25	-2.63306	16.7582
81	1256	Nillson_TopS	1256	1257	NA	0.409073	0.312426	-0.432384	-0.194376	0.817391	-0.684557	0.469906	0.685899	0.255213	-0.617668	-0.465453	0.0384558	-0.326081	0	NA	NA	3.47305	-13.3053
69	1257	Nillson_TopS	1257	1258	NA	-0.292311	0.404835	0.736567	-0.920984	-0.918994	2.18264	-0.850028	-1.26576	0.865182	1.85011	-1.54592	0.805173	0.547366	0	58257.8	-3611.22	-2.63306	16.7582
93	1258	Nillson_TopS	1258	1259	NA	-1.09423	-0.720207	0.372871	0.30797	-0.902458	0.319277	0.238673	0.948575	0.282112	0.817365	-0.355977	0.613421	-0.234342	0	-3493.32	34603.8	-4.40299	4.80104
89	1259	Nillson_TopS	1259	1260	NA	-1.14183	0.696422	-0.216416	0.597262	1.1592	0.503857	0.280003	-2.11942	-0.334928	1.00795	1.2035	0.0772744	-0.670814	0	-1820.07	-24391.6	11.2514	-19.9456
90	1260	Nillson_TopS	1260	1261	NA	1.44283	0.130698	-0.839353	-0.218854	0.633892	-0.404956	0.131198	0.28253	-0.325672	-0.573797	0.189366	-0.517323	0.45892	0	NA	NA	0.04133	-8.05116
88	1261	Nillson_TopS	1261	1262	NA	-0.232585	0.391355	0.235432	-0.853801	-0.98832	2.20641	-1.14256	-2.20942	0.763827	1.47275	1.60041	0.380751	0.26006	0	55381.4	-15313.5	-1.47868	23.5644
88	1262	Nillson_TopS	1262	1263	NA	-0.436845	0.247468	0.145078	-0.966996	-0.950336	2.01319	-1.39971	-1.02267	0.710936	1.55725	0.590466	0.513902	0.156598	0	56857	-12511.7	-1.47868	23.5644
77	1263	Nillson_TopS	1263	1264	NA	0.599619	-0.217657	-0.107844	0.483677	0.479949	-0.151263	-0.421779	0.464011	-0.790838	0.0309562	1.00392	-0.712593	-0.360513	0	-15553.5	-19819.1	7.51315	-16.4179
94	1264	Nillson_TopS	1264	1265	NA	-1.29055	0.436978	0.977529	-0.724885	0.672165	0.30758	-0.155197	-1.50905	0.122117	0.590932	2.14467	-0.0179111	-0.695578	0	NA	NA	11.5245	-18.2658
81	1265	Nillson_TopS	1265	1266	NA	0.263912	1.21559	-0.945002	-0.180311	1.73174	-0.702079	0.828677	0.23779	0.395665	-0.715432	-0.0795112	-0.653024	-0.702382	0	-38191.8	-20698.5	3.47305	-13.3053
68	1266	Nillson_TopS	1266	1267	NA	-1.06239	0.142747	1.8914	0.78858	-0.968102	0.336659	-0.824832	0.242285	0.138136	0.946368	-0.710344	0.538054	-0.444763	0	29424.1	22950	-7.16747	12.5824
90	1267	Nillson_TopS	1267	1268	NA	1.18268	0.389197	-0.588437	0.204309	0.885786	-0.472764	0.363073	0.308849	0.0512563	-1.0171	-0.736231	-0.470453	0.307796	0	NA	NA	0.04133	-8.05116
90	1268	Nillson_TopS	1268	1269	NA	1.35976	-0.250011	-0.626223	-0.0930493	0.403552	-0.4884	0.244755	0.781963	-0.212263	-0.465573	0.0403032	-0.56416	0.216987	0	NA	NA	0.04133	-8.05116
77	1269	Nillson_TopS	1269	1270	NA	0.374871	0.878694	-0.514148	-0.213501	1.25185	-0.45841	0.28404	0.455272	-0.309609	-0.372036	0.397784	-0.878068	-0.517996	0	-31205.8	-22436.4	7.51315	-16.4179
103	1270	Nillson_TopS	1270	1271	NA	-0.0980146	0.126905	-0.0712815	-0.627988	-1.04435	2.19065	-0.808682	-1.60683	-0.77996	2.47735	0.0243328	1.16368	0.521656	0	58917.7	-11539.4	-1.77317	21.6487
90	1271	Nillson_TopS	1271	1272	NA	1.43073	0.458633	-0.491799	0.622751	0.972546	-0.379069	0.217023	-0.00182247	-0.173834	-1.07975	-0.703184	-0.787832	0.434391	0	-50223.2	-24561.2	0.04133	-8.05116
101	1272	Nillson_TopS	1272	1273	NA	1.22651	0.602646	-0.627457	-0.256614	1.16664	-0.428528	0.254978	0.617951	0.0188391	-0.851719	-0.893574	-0.483917	0.170788	0	-46477.7	-22986.5	1.66122	-10.7159
96	1273	Nillson_TopS	1273	1274	NA	0.0262623	0.857971	-0.267343	-0.408812	1.26089	-0.63327	0.492639	0.303275	0.238358	-0.540979	0.451374	-0.585923	-0.800431	0	NA	NA	5.64891	-15.0421
95	1274	Nillson_TopS	1274	1275	NA	-1.19945	-0.0568277	1.70867	-0.26174	-0.336229	-0.0121697	-0.459746	0.654296	1.4825	0.442618	-1.04036	0.290963	-0.355996	0	13395.1	17818.4	-5.89098	4.66014
85	1275	Nillson_TopS	1275	1276	NA	1.05755	-0.297834	1.35093	0.553065	-0.92486	0.541431	-0.779521	-0.519829	-0.540465	0.804279	-0.977568	0.243096	0.290223	0	26851.3	19200.6	-6.1752	13.2135
90	1276	Nillson_TopS	1276	1277	NA	1.08076	0.278753	-0.75165	-0.170584	0.811715	-0.528753	0.3466	0.237159	0.00614448	-0.821665	-0.106477	-0.144447	0.0880363	0	NA	NA	0.04133	-8.05116
102	1277	Nillson_TopS	1277	1278	NA	-1.07282	-0.289993	1.67462	0.177174	-1.10678	0.780884	-0.889036	1.05351	-0.091398	1.3118	-0.965059	0.520489	0.0771999	0	26027.5	15652.4	-5.64805	12.479
96	1278	Nillson_TopS	1278	1279	NA	-0.157738	0.700412	-0.736752	-0.430339	1.23233	-0.683426	0.630378	0.243244	0.292085	-0.551473	0.415343	-0.0345644	-0.510862	0	-35867.9	-21018.5	5.64891	-15.0421
81	1279	Nillson_TopS	1279	1280	NA	0.488171	0.722688	-0.788019	-0.501418	1.19448	-0.684101	0.446709	0.624165	0.0413282	-0.666227	0.0249674	-0.271182	-0.195518	0	NA	NA	3.47305	-13.3053
90	1280	Nillson_TopS	1280	1281	NA	1.49247	0.0390144	-0.439702	0.104792	0.565428	-0.382457	-0.000515497	0.677678	-0.533749	-0.854506	0.0911186	-0.784694	0.440293	0	NA	NA	0.04133	-8.05116
94	1281	Nillson_TopS	1281	1282	NA	-0.882899	0.606747	-0.210441	-0.738128	1.0855	0.531012	0.239783	-2.16757	-0.237313	1.11559	2.62261	0.191541	-0.699838	0	NA	NA	11.5245	-18.2658
90	1282	Nillson_TopS	1282	1283	NA	1.13872	0.431972	-0.47119	-0.170892	0.845927	-0.631948	0.318333	-0.152841	-0.0189999	-0.880335	-0.102699	-0.196868	0.205217	0	-47066.9	-23986.5	0.04133	-8.05116
94	1283	Nillson_TopS	1283	1284	NA	-1.18806	0.558022	0.446262	-0.440083	0.969462	0.464462	0.323153	-2.74962	0.127413	0.971564	2.93133	0.385609	-0.780385	0	NA	NA	11.5245	-18.2658
78	1284	Nillson_TopS	1284	1285	NA	1.37981	0.0154734	-0.747004	-0.0084122	0.554454	-0.261274	0.0197693	0.114875	-0.256148	-0.796977	0.220937	-0.376919	0.462095	0	-51801	-28005	-1.47521	-5.09834
81	1285	Nillson_TopS	1285	1286	NA	0.768372	0.763273	-0.559249	-0.303273	1.20089	-0.616505	0.447253	0.741266	0.129106	-0.692123	-0.871777	-0.495142	-0.027898	0	NA	NA	3.47305	-13.3053
101	1286	Nillson_TopS	1286	1287	NA	0.799177	0.339628	-0.651688	-0.339494	0.896209	-0.580625	0.417402	0.474331	0.166575	-0.739901	-0.238617	-0.250811	0.016093	0	-44636.5	-23554	1.66122	-10.7159
94	1287	Nillson_TopS	1287	1288	NA	-0.992329	0.905331	-0.215313	-0.6794	1.27892	0.232991	0.396036	-1.93327	0.0670244	0.813307	2.14615	-0.00285057	-0.802093	0	NA	NA	11.5245	-18.2658
73	1288	Nillson_TopS	1288	1289	NA	-1.53905	-0.943148	1.17365	2.50805	-0.541545	-0.286626	0.12411	1.18412	0.0418062	0.136968	-0.0550814	0.100255	-0.606454	0	-3498.53	19506.3	-4.75949	1.27338
74	1289	Nillson_TopS	1289	1290	NA	-1.03849	0.616618	0.19021	0.0576466	1.15226	0.306786	0.257762	-1.87038	-0.209873	0.921881	1.82358	-0.118689	-1.00367	0	-439.126	-24094.1	10.1585	-18.3044
87	1290	Nillson_TopS	1290	1291	NA	2.2026	-0.793434	-0.495739	0.482622	-0.649218	0.191051	-0.336448	1.11596	-0.561719	-0.681531	-0.100257	-0.562554	0.943044	0	NA	NA	-2.80321	-1.98428
81	1291	Nillson_TopS	1291	1292	NA	0.261023	0.894642	-0.865442	-0.239358	1.34898	-0.679172	0.744713	0.0525559	0.477616	-0.635917	-0.187696	-0.137857	-0.559387	0	-38957	-20895.2	3.47305	-13.3053
90	1292	Nillson_TopS	1292	1293	NA	1.34033	-0.121276	-0.668247	-0.0112967	0.40179	-0.34736	0.0705266	0.463481	-0.13533	-0.93145	0.266473	-0.356135	0.355596	0	NA	NA	0.04133	-8.05116
100	1293	Nillson_TopS	1293	1294	NA	-0.927396	-0.933235	0.789458	-0.716575	-1.5769	1.18232	-1.1793	0.179972	-0.57413	1.89845	3.13658	0.806263	-0.157326	0	33206.9	-14675	-0.457409	31.025
78	1294	Nillson_TopS	1294	1295	NA	1.47675	-0.324197	-0.866878	-0.148624	0.166099	-0.357131	0.326418	0.323528	0.0133233	-0.878746	0.193256	-0.0762928	0.547785	0	NA	NA	-1.47521	-5.09834
95	1295	Nillson_TopS	1295	1296	NA	-0.742227	-0.0998185	1.87495	-0.150511	-0.493644	-0.0562374	-0.459074	1.09529	1.41653	0.216931	-1.00044	-0.15536	-0.57828	0	12697.5	17824.5	-5.89098	4.66014
90	1296	Nillson_TopS	1296	1297	NA	1.4128	-0.258572	-0.376699	-0.119481	0.305205	-0.382819	0.0446298	0.947811	-0.268107	-0.552241	0.0353907	-0.711524	0.278479	0	NA	NA	0.04133	-8.05116
90	1297	Nillson_TopS	1297	1298	NA	0.853794	0.431548	-0.671099	-0.255138	0.930971	-0.531741	0.417023	0.574825	-0.225019	-0.709053	-0.00881685	-0.414723	-0.0647646	0	NA	NA	0.04133	-8.05116
90	1298	Nillson_TopS	1298	1299	NA	1.26202	0.269461	-0.768154	-0.112884	0.847109	-0.380839	0.123255	0.258869	-0.173921	-0.515187	-0.214312	-0.522583	0.264777	0	NA	NA	0.04133	-8.05116
71	1299	Nillson_TopS	1299	1300	NA	-0.820135	-0.214948	1.77266	-0.0997069	-0.147961	-0.372225	-0.203901	0.65171	0.994528	0.112279	-0.65847	-0.0472697	-0.413565	0	12361.2	16422.3	-7.2091	4.52457
87	1300	Nillson_TopS	1300	1301	NA	1.605	-0.179982	-0.567427	0.043557	0.325729	-0.167904	0.107152	0.145278	-0.470788	-0.837651	0.0724905	-0.405993	0.679886	0	-52747.3	-28985.7	-2.80321	-1.98428
97	1301	Nillson_TopS	1301	1302	NA	-0.80572	-0.779899	0.622599	-0.607202	-1.63201	1.21533	-1.1013	-0.253003	-0.573302	2.04617	2.89581	0.852961	-0.0354647	0	35943.6	-14888.1	-0.640634	29.6106
100	1302	Nillson_TopS	1302	1303	NA	-0.985675	-0.969955	0.451595	-0.848057	-1.52461	1.32472	-1.16456	0.641856	-0.898702	1.96166	3.40318	0.718534	-0.00198505	0	31312	-14735	-0.457409	31.025
90	1303	Nillson_TopS	1303	1304	NA	0.701383	0.0337889	-0.585652	-0.292634	0.515884	-0.623759	0.488803	0.789327	-0.0294236	-0.72589	0.0540051	-0.0562739	-0.0012439	0	NA	NA	0.04133	-8.05116
71	1304	Nillson_TopS	1304	1305	NA	-1.05421	-0.184752	2.46437	-0.0791374	-0.383613	-0.422212	-0.386353	0.410927	1.52933	-0.0252918	-0.980262	0.24318	-0.167414	0	NA	NA	-7.2091	4.52457
104	1305	Nillson_TopS	1305	1306	NA	-0.771223	-0.218716	0.650111	-0.766279	-1.49924	1.54027	-1.18002	-0.697571	-0.318655	1.6399	2.32052	0.698247	0.0431312	0	45414.9	-16800.6	-1.20331	25.4698
78	1306	Nillson_TopS	1306	1307	NA	1.43673	0.0537771	-0.622437	-0.0635991	0.465584	-0.32247	0.290482	0.491961	0.124948	-0.881475	-0.66813	-0.451572	0.538198	0	NA	NA	-1.47521	-5.09834
71	1307	Nillson_TopS	1307	1308	NA	-1.23589	-0.354909	3.40404	-0.278744	-0.161975	-0.73243	-0.131316	-0.533733	1.56702	-0.769574	-0.678704	0.74669	0.466617	0	14452.2	11190.1	-7.2091	4.52457
90	1308	Nillson_TopS	1308	1309	NA	1.5516	0.223551	-0.763988	-0.0200203	0.770926	-0.213082	0.168341	0.628637	-0.381263	-0.752175	-0.0943742	-0.90413	0.26947	0	NA	NA	0.04133	-8.05116
81	1309	Nillson_TopS	1309	1310	NA	0.428999	0.715768	-0.343953	-0.433927	1.16415	-0.691793	0.567537	0.135956	0.161487	-0.758662	0.0117501	-0.376566	-0.253373	0	NA	NA	3.47305	-13.3053
78	1310	Nillson_TopS	1310	1311	NA	1.83624	0.0345692	-0.623424	0.123256	0.459972	-0.241963	0.107162	-0.307849	-0.261428	-0.947027	-0.320204	-0.270662	0.838222	0	-53408.9	-26578.6	-1.47521	-5.09834
103	1311	Nillson_TopS	1311	1312	NA	-0.198877	-0.238053	0.097882	-0.334	-0.994838	2.24061	-1.15094	-1.764	-0.567875	2.37278	0.69589	1.14984	0.655145	0	55530.9	-12485	-1.77317	21.6487
90	1312	Nillson_TopS	1312	1313	NA	1.128	0.0320083	-0.751004	-0.300723	0.422466	-0.372938	0.129031	0.615444	-0.197399	-0.502073	0.213927	-0.240674	0.0987564	0	-47390.7	-26702.1	0.04133	-8.05116
87	1313	Nillson_TopS	1313	1314	NA	1.72291	-0.0980857	-0.87478	-0.0149675	0.132437	-0.117968	-0.0361001	0.702708	-0.505423	-0.705992	0.196843	-0.55049	0.614162	0	NA	NA	-2.80321	-1.98428
101	1314	Nillson_TopS	1314	1315	NA	1.16277	0.33041	-0.55701	0.179136	0.825091	-0.492852	0.400438	-0.10153	-0.00490483	-0.836619	-0.420744	-0.355551	0.197721	0	-48496.6	-23793	1.66122	-10.7159
82	1315	Nillson_TopS	1315	1316	NA	0.052942	0.0457439	-0.141443	0.924624	-0.0138519	-0.483295	0.82411	-1.4934	1.07616	-0.510696	-1.27176	1.37684	0.254491	0	3822.26	13071.9	-2.09482	14.9584
90	1316	Nillson_TopS	1316	1317	NA	1.31706	0.118033	-1.09983	0.266523	0.490161	-0.642506	0.236198	0.966825	-0.0392423	-0.960478	-0.173328	-0.382682	0.499237	0	NA	NA	0.04133	-8.05116
101	1317	Nillson_TopS	1317	1318	NA	1.03521	0.663913	-0.905006	-0.240437	1.04106	-0.662253	0.487451	-0.0884736	0.0971264	-0.841697	0.00821889	-0.306084	0.170809	0	NA	NA	1.66122	-10.7159
88	1318	Nillson_TopS	1318	1319	NA	-0.553054	0.176088	0.103128	-0.720508	-1.10615	1.73861	-1.25792	-0.925845	0.157322	1.46268	1.74927	0.23657	0.0122378	0	54628.2	-16813.4	-1.47868	23.5644
71	1319	Nillson_TopS	1319	1320	NA	-1.26358	-0.0851447	1.82231	-0.189514	-0.110892	-0.120116	-0.198362	0.614569	1.55875	0.135355	-1.16697	0.285809	-0.447245	0	13100.7	17012.9	-7.2091	4.52457
87	1320	Nillson_TopS	1320	1321	NA	1.59215	-0.277973	-0.421907	-0.0172619	0.102229	-0.207192	0.0240751	-0.0500724	-0.243569	-0.586341	0.149012	-0.488821	0.713944	0	NA	NA	-2.80321	-1.98428
87	1321	Nillson_TopS	1321	1322	NA	2.03132	-0.44692	-0.848556	0.258391	-0.0953712	0.0816219	0.0322027	0.603937	-0.304482	-0.88662	-0.374264	-0.289781	0.816503	0	-53467.9	-29846.5	-2.80321	-1.98428
68	1322	Nillson_TopS	1322	1323	NA	-0.264843	0.376861	0.895099	0.536836	-0.669019	0.545288	-0.531805	-0.565152	-0.481704	0.810291	-0.277297	0.128403	-0.00161391	0	30757.8	21407.7	-7.16747	12.5824
81	1323	Nillson_TopS	1323	1324	NA	0.678424	0.795066	-1.00581	-0.129604	1.3462	-0.556105	0.762032	0.0998033	0.145842	-0.762138	-0.581153	-0.22508	-0.052207	0	NA	NA	3.47305	-13.3053
96	1324	Nillson_TopS	1324	1325	NA	0.384398	0.378619	-0.528494	-0.389249	0.966004	-0.737097	0.515637	0.301961	0.121398	-0.576192	0.473741	-0.273406	-0.336225	0	-39087.8	-22972.7	5.64891	-15.0421
76	1325	Nillson_TopS	1325	1326	NA	-1.32196	-0.640279	0.25659	0.0119736	-0.889458	0.103583	0.614662	0.487322	0.582205	0.509601	0.181323	0.671624	0.00662497	0	-4861.25	29129.8	-3.9653	1.78471
90	1326	Nillson_TopS	1326	1327	NA	1.41203	0.193397	-0.741228	-0.0192314	0.725395	-0.528689	0.256864	0.236238	0.0916185	-0.94347	-0.416283	-0.357794	0.518672	0	NA	NA	0.04133	-8.05116
90	1327	Nillson_TopS	1327	1328	NA	1.79775	0.193133	-0.583102	0.130163	0.643486	-0.341347	0.0913251	0.361168	-0.26545	-0.855899	-0.286752	-1.00687	0.65909	0	NA	NA	0.04133	-8.05116
90	1328	Nillson_TopS	1328	1329	NA	0.984083	0.283367	-0.480769	0.363433	0.807706	-0.445806	0.285131	0.448835	-0.151484	-0.882779	-0.467682	-0.49414	0.0833124	0	-47757.3	-23936.3	0.04133	-8.05116
90	1329	Nillson_TopS	1329	1330	NA	1.21735	0.175231	-0.680244	0.0401622	0.465668	-0.549614	0.207632	0.227553	-0.0588121	-0.818949	-0.00755462	-0.342824	0.423201	0	NA	NA	0.04133	-8.05116
77	1330	Nillson_TopS	1330	1331	NA	0.0656105	0.78756	-0.645017	0.227209	1.20961	-0.462324	0.207469	0.169157	-0.387177	-0.0436907	0.39302	-0.66673	-0.544747	0	-27623.1	-22155.3	7.51315	-16.4179
94	1331	Nillson_TopS	1331	1332	NA	-0.904991	0.500167	-0.0513675	-0.636247	0.959675	0.547913	0.166032	-2.08838	-0.34107	1.15258	2.57972	0.196421	-0.742182	0	3594.82	-24779.7	11.5245	-18.2658
90	1332	Nillson_TopS	1332	1333	NA	0.882551	0.347952	-0.651144	-0.258868	0.8004	-0.50327	0.282418	0.336205	-0.0241056	-0.654572	-0.0384892	-0.309751	0.0587945	0	NA	NA	0.04133	-8.05116
81	1333	Nillson_TopS	1333	1334	NA	0.851899	0.704008	-0.493396	-0.288822	1.24976	-0.397949	0.461913	0.457031	-0.186958	-0.813873	-0.620949	-0.514288	0.00169107	0	NA	NA	3.47305	-13.3053
81	1334	Nillson_TopS	1334	1335	NA	0.510213	0.656724	-0.491835	-0.346387	1.11723	-0.632043	0.458693	0.538612	-0.00299641	-0.654501	0.0196392	-0.467785	-0.369618	0	-40017.3	-22534.1	3.47305	-13.3053
81	1335	Nillson_TopS	1335	1336	NA	0.661209	0.469787	-0.693888	-0.267011	0.927172	-0.595659	0.472908	0.372469	0.0183409	-0.620538	0.00499973	-0.384737	-0.054855	0	NA	NA	3.47305	-13.3053
74	1336	Nillson_TopS	1336	1337	NA	-1.01574	0.843984	-0.286218	-0.143127	1.34846	0.218974	0.271251	-1.51294	-0.331684	0.882464	1.34967	-0.0137542	-0.858826	0	-1250.39	-26027.2	10.1585	-18.3044
87	1337	Nillson_TopS	1337	1338	NA	2.1357	-0.5214	-0.226999	0.321071	-0.392298	0.0586305	-0.296656	0.659396	-0.633771	-0.941436	0.102528	-0.613885	0.931236	0	NA	NA	-2.80321	-1.98428
90	1338	Nillson_TopS	1338	1339	NA	1.26522	0.337391	-0.724512	0.208746	0.895409	-0.365715	0.41126	0.0208158	-0.236705	-1.02394	-0.0458601	-0.630073	0.333725	0	NA	NA	0.04133	-8.05116
90	1339	Nillson_TopS	1339	1340	NA	1.23337	-0.121518	-0.505353	-0.193239	0.201396	-0.364997	0.147439	0.536207	-0.179586	-0.694867	0.262103	-0.32619	0.24565	0	NA	NA	0.04133	-8.05116
90	1340	Nillson_TopS	1340	1341	NA	1.27829	0.142256	-0.815578	-0.247102	0.658521	-0.270663	0.364731	0.00460089	-0.147274	-0.618226	-0.245635	-0.301567	0.541526	0	NA	NA	0.04133	-8.05116
81	1341	Nillson_TopS	1341	1342	NA	0.671048	0.828488	-0.732687	-0.342776	1.14807	-0.690665	0.548718	0.283125	0.218447	-0.892745	-0.422952	-0.140133	-0.0408889	0	NA	NA	3.47305	-13.3053
89	1342	Nillson_TopS	1342	1343	NA	-1.13147	0.909844	-0.127525	0.745352	1.29242	0.23988	0.33313	-1.80389	-0.0810975	0.726332	0.806602	-0.0363532	-1.0525	0	-2880.44	-24336.3	11.2514	-19.9456
95	1343	Nillson_TopS	1343	1344	NA	-0.93034	-0.489482	2.00285	-0.197952	-0.211996	-0.173281	-0.329678	0.934662	1.6341	0.135493	-1.0848	0.0836218	-0.404442	0	12874.2	17262	-5.89098	4.66014
94	1344	Nillson_TopS	1344	1345	NA	-1.10709	0.461437	-0.114577	-0.622502	1.02159	0.435724	0.184114	-1.97212	-0.0803757	1.10199	2.53866	0.18096	-0.823511	0	3411.49	-24883.1	11.5245	-18.2658
98	1345	Nillson_TopS	1345	1346	NA	-1.2074	0.537717	1.36279	1.41973	-0.802234	0.973522	-1.07969	-1.92886	-0.300446	1.51871	0.89511	0.371079	-0.281721	0	26060.2	4833.75	11.8224	-20.6652
87	1346	Nillson_TopS	1346	1347	NA	2.00393	-0.412579	-0.381758	0.503284	-0.0727395	-0.156881	-0.0596279	0.0195343	-0.251245	-1.10952	-0.254006	-0.208555	0.862456	0	NA	NA	-2.80321	-1.98428
87	1347	Nillson_TopS	1347	1348	NA	1.80311	-0.160508	-0.449296	0.26105	0.319018	-0.173546	-0.308946	0.614047	-0.550777	-0.692858	-0.0578897	-0.80143	0.627569	0	-51940.5	-29954.1	-2.80321	-1.98428
83	1348	Nillson_TopS	1348	1349	NA	-0.707059	-0.602549	0.886014	-0.497067	-1.19799	1.52534	-1.05401	-1.6911	-0.364049	2.14115	2.24315	0.959671	0.173931	0	42856.8	-14488.9	-0.90395	27.6653
95	1349	Nillson_TopS	1349	1350	NA	-1.37175	-0.342593	2.06739	-0.847789	-0.613929	0.0150417	-0.307629	1.19714	1.67141	0.615036	-1.03772	0.334079	-0.151025	0	13173.1	18097	-5.89098	4.66014
90	1350	Nillson_TopS	1350	1351	NA	1.2682	0.308275	-0.445996	-0.0481052	0.879978	-0.516431	0.374401	0.0595927	0.000434548	-0.90096	-0.63935	-0.179145	0.180289	0	NA	NA	0.04133	-8.05116
78	1351	Nillson_TopS	1351	1352	NA	1.37072	0.245395	-0.585511	-0.0761852	0.57313	-0.1995	0.0295713	0.131759	-0.203938	-0.761529	-0.112841	-0.408745	0.266931	0	NA	NA	-1.47521	-5.09834
101	1352	Nillson_TopS	1352	1353	NA	0.816456	0.843954	-0.387099	0.127437	1.25277	-0.57913	0.537449	-0.21209	0.211854	-0.921896	-0.758128	-0.30172	-0.222423	0	NA	NA	1.66122	-10.7159
93	1353	Nillson_TopS	1353	1354	NA	-1.38077	-0.445738	0.351325	1.38176	-0.728547	-0.0988377	0.607845	1.47284	0.229596	0.361962	-1.19899	0.812078	-0.313144	0	-3704.65	33743.2	-4.40299	4.80104
87	1354	Nillson_TopS	1354	1355	NA	1.8976	-0.382128	-0.587615	0.139444	-0.288602	-0.0768	-0.231224	0.750459	-0.210734	-0.722703	-0.0592147	-0.503375	0.725209	0	NA	NA	-2.80321	-1.98428
90	1355	Nillson_TopS	1355	1356	NA	1.44109	0.0503012	-0.490208	0.0986505	0.601204	-0.305565	0.0720605	0.322011	-0.156838	-0.986672	-0.154256	-0.539902	0.383775	0	NA	NA	0.04133	-8.05116
101	1356	Nillson_TopS	1356	1357	NA	0.762374	0.38686	-0.64128	-0.25405	0.729933	-0.357152	0.389145	0.479428	-0.067227	-0.583417	-0.0774102	-0.512651	0.00877668	0	NA	NA	1.66122	-10.7159
81	1357	Nillson_TopS	1357	1358	NA	0.265873	1.02872	-0.600621	-0.421397	1.50537	-0.601882	0.586463	0.38165	-0.00466391	-0.492615	0.00408269	-0.571724	-0.627789	0	NA	NA	3.47305	-13.3053
71	1358	Nillson_TopS	1358	1359	NA	-1.30602	-0.422618	3.59442	-0.325923	-0.248267	-0.676051	-0.0195293	-0.183432	1.453	-0.780167	-0.386421	0.51674	0.0869748	0	13821.3	11457.4	-7.2091	4.52457
87	1359	Nillson_TopS	1359	1360	NA	1.6808	0.00241039	-0.680478	0.18872	0.297546	-0.250798	-0.0145426	0.371717	-0.288474	-0.9828	-0.207217	-0.409985	0.698135	0	NA	NA	-2.80321	-1.98428
87	1360	Nillson_TopS	1360	1361	NA	2.04166	-0.465295	-0.397239	0.43986	-0.192942	-0.169082	-0.0626085	0.710054	-0.24763	-0.944258	-0.715806	-0.385109	0.9529	0	NA	NA	-2.80321	-1.98428
90	1361	Nillson_TopS	1361	1362	NA	0.91553	-0.119853	-0.448486	-0.237004	0.528001	-0.384444	0.412508	0.317906	0.0843905	-0.510543	-0.157701	-0.18686	-0.0285068	0	NA	NA	0.04133	-8.05116
81	1362	Nillson_TopS	1362	1363	NA	0.753203	0.498481	-0.809548	-0.278838	1.04367	-0.614975	0.4972	0.777416	-0.0670828	-0.603637	-0.335844	-0.140095	-0.293016	0	NA	NA	3.47305	-13.3053
90	1363	Nillson_TopS	1363	1364	NA	1.16964	-0.139706	-0.506273	-0.11273	0.342244	-0.463186	0.366877	0.342478	0.268877	-0.871479	-0.420804	0.0142421	0.29101	0	NA	NA	0.04133	-8.05116
87	1364	Nillson_TopS	1364	1365	NA	1.937	-0.450501	-0.618801	0.268809	0.461127	-0.16386	-0.0453873	0.523344	-0.375648	-0.90312	-0.299284	-0.618558	0.824661	0	NA	NA	-2.80321	-1.98428
79	1365	Nillson_TopS	1365	1366	NA	0.239165	0.548807	0.19346	-0.619748	-1.12036	2.73444	-0.900723	-1.753	-0.897375	2.43359	-0.926493	1.16787	0.882664	0	61993.3	-10294.3	-2.18619	19.1368
101	1366	Nillson_TopS	1366	1367	NA	0.682601	0.33284	-0.52945	-0.351507	0.741886	-0.603008	0.365905	0.580419	0.105528	-0.933363	0.133937	-0.248823	0.0180356	0	-43935.4	-24547.9	1.66122	-10.7159
100	1367	Nillson_TopS	1367	1368	NA	-1.00286	-0.556929	0.492397	-0.516786	-1.53733	1.31137	-1.05452	0.298309	-0.632983	1.99085	2.47777	0.611907	-0.228041	0	32909.9	-14100.6	-0.457409	31.025
87	1368	Nillson_TopS	1368	1369	NA	1.59197	-0.294835	-0.577346	0.248612	0.118131	-0.323498	0.286181	0.335676	-0.100664	-1.10858	-0.0495956	-0.312566	0.603429	0	NA	NA	-2.80321	-1.98428
90	1369	Nillson_TopS	1369	1370	NA	1.41797	0.267542	-0.880602	-0.146417	0.609981	-0.332561	0.184218	0.554354	-0.112046	-0.841731	-0.234062	-0.366012	0.292412	0	NA	NA	0.04133	-8.05116
94	1370	Nillson_TopS	1370	1371	NA	-0.701605	0.662249	-0.33221	-0.736266	1.04413	0.514975	0.186716	-2.24146	-0.201951	1.08716	2.22828	0.225354	-0.389736	0	NA	NA	11.5245	-18.2658
93	1371	Nillson_TopS	1371	1372	NA	-1.46594	-0.596206	0.633287	0.436882	-1.07977	-0.0135899	0.715542	1.49393	0.586692	0.231399	-0.665267	0.825603	-0.189159	0	NA	NA	-4.40299	4.80104
101	1372	Nillson_TopS	1372	1373	NA	1.01666	0.602787	-0.731923	-0.289046	1.19634	-0.571272	0.415781	-0.235486	0.00144799	-0.860366	0.354374	-0.444002	-0.0291653	0	NA	NA	1.66122	-10.7159
90	1373	Nillson_TopS	1373	1374	NA	1.10623	0.00909637	-0.264227	0.0910956	0.524506	-0.404924	0.104192	0.294101	-0.115093	-1.01718	0.0809544	-0.396829	0.240126	0	-50646.6	-26593.8	0.04133	-8.05116
101	1374	Nillson_TopS	1374	1375	NA	0.834283	0.29222	-1.0494	-0.379439	0.844606	-0.512573	0.396359	0.686356	-0.0666249	-0.675418	0.497465	-0.254245	-0.142273	0	NA	NA	1.66122	-10.7159
81	1375	Nillson_TopS	1375	1376	NA	0.459363	0.840854	-0.611078	-0.313006	1.21059	-0.584424	0.609062	-0.135333	0.155823	-0.79359	-0.0423229	-0.208582	-0.233049	0	NA	NA	3.47305	-13.3053
71	1376	Nillson_TopS	1376	1377	NA	-1.37496	-0.312107	3.75912	-0.301934	-0.372288	-0.856768	-0.0435012	-0.535004	1.56908	-0.816887	-0.357128	0.751883	0.320071	0	NA	NA	-7.2091	4.52457
90	1377	Nillson_TopS	1377	1378	NA	0.190174	-0.0173611	1.06651	-0.535218	0.211172	-0.609441	-0.00518637	-0.0141183	0.427355	-0.632584	0.368489	-0.00944193	-0.212518	0	NA	NA	0.04133	-8.05116
81	1378	Nillson_TopS	1378	1379	NA	0.620603	0.321318	-0.645799	-0.198855	0.931355	-0.472589	0.463967	0.431389	-0.0478979	-0.447801	-0.279741	-0.325078	-0.096307	0	NA	NA	3.47305	-13.3053
90	1379	Nillson_TopS	1379	1380	NA	1.51099	0.0305095	-0.74252	0.357565	0.547313	-0.253572	0.258113	0.0150073	-0.0531693	-1.11793	-0.243552	-0.491976	0.608779	0	NA	NA	0.04133	-8.05116
89	1380	Nillson_TopS	1380	1381	NA	-1.12823	0.541774	-0.0134634	0.649319	1.06415	0.283659	0.155777	-1.87419	-0.255486	0.970331	1.47562	-0.0701782	-0.832379	0	-1602.39	-23591.7	11.2514	-19.9456
94	1381	Nillson_TopS	1381	1382	NA	-1.1916	0.755493	1.40538	0.105564	1.16824	0.1687	0.240821	-2.43061	-0.274839	0.827234	1.90677	-0.0804351	-0.990267	0	1627.97	-22093	11.5245	-18.2658
71	1382	Nillson_TopS	1382	1383	NA	-1.29309	-0.379004	3.08347	-0.320807	-0.448324	-0.548605	-0.0427248	0.125602	1.6075	-0.663976	-0.786827	0.716601	0.18222	0	13813.1	13085.7	-7.2091	4.52457
95	1383	Nillson_TopS	1383	1384	NA	-1.01743	0.000959625	1.2258	-0.064372	-0.366081	0.0116631	-0.277404	1.05464	1.70115	0.237573	-0.841228	-0.126376	-0.713857	0	12150.2	18100.5	-5.89098	4.66014
81	1384	Nillson_TopS	1384	1385	NA	0.491584	0.45637	-0.261131	-0.439561	1.04798	-0.590908	0.377666	0.132734	0.120052	-0.601039	0.150533	-0.2754	-0.355981	0	NA	NA	3.47305	-13.3053
90	1385	Nillson_TopS	1385	1386	NA	1.33424	0.427271	-0.905625	-0.00113717	0.99366	-0.367681	0.334762	0.504341	-0.0274911	-1.06028	-0.45425	-0.540554	0.281942	0	NA	NA	0.04133	-8.05116
78	1386	Nillson_TopS	1386	1387	NA	1.65305	-0.000945871	-0.770598	-0.0294028	0.464369	-0.26839	0.221676	0.366407	-0.0438752	-0.844331	-0.609533	-0.232735	0.510207	0	NA	NA	-1.47521	-5.09834
75	1387	Nillson_TopS	1387	1388	NA	1.57641	-1.01723	0.26528	0.49543	-1.49162	-0.0237082	-0.15747	1.02627	-0.144658	-0.182455	-0.368675	0.0103344	0.791877	0	-17232.1	4300.71	-3.41715	-0.207763
78	1388	Nillson_TopS	1388	1389	NA	1.49068	-0.200394	-0.437406	-0.0275842	0.217461	-0.248683	0.258206	0.104569	-0.0636964	-1.011	-0.239058	-0.0696912	0.534648	0	-53468	-27081.6	-1.47521	-5.09834
95	1389	Nillson_TopS	1389	1390	NA	-1.12936	-0.0606949	1.91502	-0.130383	-0.521031	-0.108696	-0.206704	0.618725	1.73461	0.379144	-1.35885	0.209702	-0.269178	0	13384.5	17512.5	-5.89098	4.66014
71	1390	Nillson_TopS	1390	1391	NA	-1.18689	-0.417434	1.5447	0.845028	-0.248164	-0.302905	-0.105138	0.378996	0.849164	-0.221925	-0.640704	0.258091	-0.151319	0	NA	NA	-7.2091	4.52457
87	1391	Nillson_TopS	1391	1392	NA	1.33248	-0.103104	-0.739224	0.189319	0.406714	-0.391011	0.11441	0.39212	-0.0509549	-0.990585	-0.0223681	-0.234835	0.436971	0	NA	NA	-2.80321	-1.98428
90	1392	Nillson_TopS	1392	1393	NA	1.0504	0.234257	-0.394934	0.123279	0.835889	-0.437619	0.459176	-0.175782	-0.0164487	-0.926793	-0.358152	-0.228722	0.117149	0	NA	NA	0.04133	-8.05116
81	1393	Nillson_TopS	1393	1394	NA	0.755869	0.668054	-0.585475	-0.332469	1.02531	-0.677409	0.386325	0.225453	0.202563	-0.684799	-0.155351	-0.432844	-0.0406614	0	-42875	-22700.1	3.47305	-13.3053
93	1394	Nillson_TopS	1394	1395	NA	-1.08032	-0.195388	0.364462	0.180762	-0.721719	-0.39617	0.390332	1.39137	0.47598	0.15673	-0.497504	0.441465	0.0733679	0	-4359.03	30868	-4.40299	4.80104
90	1395	Nillson_TopS	1395	1396	NA	1.32658	-0.22081	-0.275903	0.257176	0.414065	-0.493908	0.0768236	0.38862	-0.188798	-0.922627	-0.179529	-0.170482	0.262552	0	NA	NA	0.04133	-8.05116
87	1396	Nillson_TopS	1396	1397	NA	1.7758	-0.0238578	-0.780221	0.272375	0.473373	-0.0464044	-0.132948	0.266891	-0.527777	-0.809822	-0.204066	-0.473976	0.644995	0	NA	NA	-2.80321	-1.98428
90	1397	Nillson_TopS	1397	1398	NA	1.16506	0.235638	-0.507525	-0.21926	0.772629	-0.496742	0.352001	0.226023	-0.0520808	-0.870546	-0.0181227	-0.44365	0.165717	0	NA	NA	0.04133	-8.05116
81	1398	Nillson_TopS	1398	1399	NA	-0.290584	0.339948	-0.00898593	0.206509	0.968019	-0.66197	0.413825	0.994542	-0.0188463	-0.532022	0.194006	-0.404339	-0.85464	0	NA	NA	3.47305	-13.3053
90	1399	Nillson_TopS	1399	1400	NA	1.58056	0.301453	-0.614386	0.1913	0.826989	-0.363327	0.0157327	0.787817	-0.532233	-0.776048	-0.50106	-0.798369	0.400448	0	NA	NA	0.04133	-8.05116
74	1400	Nillson_TopS	1400	1401	NA	-0.893426	1.00996	-0.627086	0.013345	1.55818	0.478023	0.607131	-1.90732	-0.136414	1.01548	0.781229	-0.0257173	-0.874411	0	-2041.92	-26581.7	10.1585	-18.3044
90	1401	Nillson_TopS	1401	1402	NA	1.05639	0.0860612	-0.0915365	0.741518	0.658084	-0.590714	0.37758	-0.00105635	0.143945	-0.958096	-0.988543	-0.171359	0.13752	0	NA	NA	0.04133	-8.05116
87	1402	Nillson_TopS	1402	1403	NA	1.56186	-0.130263	-0.882576	0.0614005	0.273611	-0.302702	0.0110043	0.633878	-0.316256	-0.911471	0.268116	-0.426141	0.609053	0	NA	NA	-2.80321	-1.98428
87	1403	Nillson_TopS	1403	1404	NA	0.909673	-0.187055	-0.606247	0.239986	0.394409	-0.407417	-0.197859	1.1171	-0.846976	-0.0419998	0.58301	-0.687733	0.114492	0	NA	NA	-2.80321	-1.98428
78	1404	Nillson_TopS	1404	1405	NA	1.45471	-0.171383	0.0627402	0.290535	0.0323708	-0.310739	-0.15655	0.206918	-0.0950993	-0.894254	-0.317609	-0.294036	0.444333	0	-52307.1	-28463.6	-1.47521	-5.09834
90	1405	Nillson_TopS	1405	1406	NA	1.22227	-0.315902	-0.343067	-0.185526	0.121505	-0.373532	0.0687869	0.911477	-0.237251	-0.81589	0.32328	-0.371155	0.28808	0	NA	NA	0.04133	-8.05116
90	1406	Nillson_TopS	1406	1407	NA	1.23102	0.0371399	-0.35991	0.334914	0.256353	-0.522408	0.0900251	0.245466	0.0989903	-0.854496	-0.206103	-0.309667	0.202661	0	NA	NA	0.04133	-8.05116
87	1407	Nillson_TopS	1407	1408	NA	1.25689	-0.227884	-0.321727	0.530246	0.321654	-0.548525	-0.106747	0.5745	-0.229633	-0.982769	0.276748	-0.479159	0.285777	0	NA	NA	-2.80321	-1.98428
95	1408	Nillson_TopS	1408	1409	NA	-1.25038	0.0242373	1.7386	-0.518895	-0.142276	-0.0585466	-0.184498	0.784772	1.6291	0.407046	-1.17584	0.174364	-0.484265	0	13101.5	17824.8	-5.89098	4.66014
102	1409	Nillson_TopS	1409	1410	NA	-0.952048	-0.492235	1.35215	-0.0232595	-0.856048	0.450843	-0.0565868	-0.755945	0.374135	0.862603	-0.12581	0.752901	0.00645726	0	NA	NA	-5.64805	12.479
89	1410	Nillson_TopS	1410	1411	NA	-1.09904	0.809789	0.632025	0.278981	1.275	-0.173922	0.296516	-1.23573	0.232402	0.234918	0.668206	-0.269456	-1.08231	0	-2101.1	-24527.2	11.2514	-19.9456
87	1411	Nillson_TopS	1411	1412	NA	1.76282	-0.0395771	-0.350386	0.349235	0.404761	-0.103854	-0.0621822	-0.20522	-0.252125	-1.16311	-0.11341	-0.543255	0.737853	0	NA	NA	-2.80321	-1.98428
69	1412	Nillson_TopS	1412	1413	NA	-0.386032	0.219987	0.550284	-0.608796	-0.661737	1.79659	-0.722712	-2.07657	1.36475	1.91282	-1.17725	1.06078	0.395355	0	58333.6	-2929.86	-2.63306	16.7582
90	1413	Nillson_TopS	1413	1414	NA	1.67949	0.641292	-1.12515	0.233915	1.09467	-0.261352	0.36803	-0.223845	0.0234379	-1.05785	-0.654807	-0.702722	0.740171	0	NA	NA	0.04133	-8.05116
69	1414	Nillson_TopS	1414	1415	NA	-0.615229	0.373003	1.22939	-1.45908	-1.2331	1.85467	-0.331485	-1.34681	0.602437	1.46134	0.53881	0.390566	0.140719	0	55670.8	-11561.9	-2.63306	16.7582
90	1415	Nillson_TopS	1415	1416	NA	1.13174	-0.309797	-0.523025	0.432737	-0.0308336	-0.431372	0.0775434	0.710466	-0.437441	-0.817082	0.6688	-0.35507	0.221507	0	-50296.1	-28961.8	0.04133	-8.05116
94	1416	Nillson_TopS	1416	1417	NA	-0.862754	0.503095	-0.338029	-0.747603	1.04593	0.717683	0.154955	-1.28333	-0.339732	1.31991	1.09814	0.248438	-0.77881	0	265.245	-25679.2	11.5245	-18.2658
104	1417	Nillson_TopS	1417	1418	NA	-0.335433	-0.118163	0.319332	-0.729423	-1.3567	1.9769	-1.55705	-1.68617	-0.475886	1.81294	3.06942	0.6542	0.527843	0	48741.6	-17624.6	-1.20331	25.4698
94	1418	Nillson_TopS	1418	1419	NA	-0.916674	1.19884	-0.444495	-0.532203	1.77795	0.375923	0.802256	-2.20574	0.0414141	0.783712	1.14274	0.0486332	-0.748905	0	NA	NA	11.5245	-18.2658
86	1419	Nillson_TopS	1419	1420	NA	-1.20336	-0.605703	0.788247	1.25875	-1.00207	0.437825	0.0949797	0.217941	0.256064	0.883757	-0.949101	0.466284	0.15204	0	NA	NA	-4.2936	8.20126
90	1420	Nillson_TopS	1420	1421	NA	1.13958	0.0614772	-0.381341	0.00972209	0.570726	-0.401105	-0.138529	0.555793	-0.319033	-0.86976	0.574601	-0.591452	0.0799402	0	NA	NA	0.04133	-8.05116
87	1421	Nillson_TopS	1421	1422	NA	1.4949	-0.421231	-0.372767	0.236607	0.0876664	-0.377814	0.0199028	0.696976	-0.409687	-0.821618	-0.0515048	-0.220879	0.47622	0	-52029	-29590.3	-2.80321	-1.98428
81	1422	Nillson_TopS	1422	1423	NA	0.515069	0.689666	-0.522148	-0.380807	1.2419	-0.685889	0.762989	0.267192	0.178392	-0.726921	-0.73482	-0.0507061	-0.121476	0	NA	NA	3.47305	-13.3053
71	1423	Nillson_TopS	1423	1424	NA	-1.14536	-0.558086	2.59705	-0.515969	-0.567716	-0.586849	-0.251727	1.81928	1.23785	-0.4377	-1.09159	0.51379	0.2015	0	9872.96	14529.7	-7.2091	4.52457
71	1424	Nillson_TopS	1424	1425	NA	-1.25469	-0.279549	3.52875	-0.177108	-0.283735	-0.641959	-0.233433	-0.37493	1.62797	-0.769284	-0.96864	0.754376	0.412235	0	NA	NA	-7.2091	4.52457
90	1425	Nillson_TopS	1425	1426	NA	1.08186	-0.11987	-0.7565	-0.108416	0.255783	-0.326788	0.0452915	0.484331	-0.114301	-0.462577	0.572502	-0.403502	0.107684	0	NA	NA	0.04133	-8.05116
81	1426	Nillson_TopS	1426	1427	NA	1.02862	0.376389	-0.367048	-0.191201	0.904124	-0.558364	0.389927	-0.246487	-0.155576	-0.796351	0.0855668	-0.352646	0.160914	0	NA	NA	3.47305	-13.3053
90	1427	Nillson_TopS	1427	1428	NA	0.856195	-0.0190029	-0.160957	-0.301984	0.361334	-0.473425	-0.186227	0.533215	-0.598616	-0.330763	1.02432	-0.641575	0.246011	0	-47870.8	-27881	0.04133	-8.05116
90	1428	Nillson_TopS	1428	1429	NA	1.40109	0.352785	-0.639538	-0.189302	0.775052	-0.429759	0.106981	0.293905	-0.358282	-0.799798	0.0510394	-0.58773	0.40047	0	NA	NA	0.04133	-8.05116
103	1429	Nillson_TopS	1429	1430	NA	0.0177271	0.279429	0.0153623	-0.366797	-1.0859	2.57902	-1.13131	-1.98768	-0.881297	2.42139	0.413818	1.11709	0.689236	0	57375.6	-12191.5	-1.77317	21.6487
81	1430	Nillson_TopS	1430	1431	NA	0.655901	0.727312	-0.604961	-0.320003	1.3468	-0.693266	0.568609	0.126365	0.120933	-0.765532	-0.208746	-0.382031	-0.160973	0	-41918.5	-22074.2	3.47305	-13.3053
79	1431	Nillson_TopS	1431	1432	NA	-0.111223	-0.0935881	0.011958	-0.563736	-0.838957	2.28325	-0.848084	-1.58271	-0.574032	2.68033	-0.764913	1.31894	0.681073	0	61407.5	-10527.3	-2.18619	19.1368
90	1432	Nillson_TopS	1432	1433	NA	1.53437	0.0934544	-0.431771	0.398788	0.62807	-0.507744	0.247486	0.290922	-0.126215	-1.10702	-0.283868	-0.563405	0.256221	0	NA	NA	0.04133	-8.05116
90	1433	Nillson_TopS	1433	1434	NA	1.25678	0.0392381	-0.509895	0.00242219	0.542204	-0.334755	0.0252221	0.532594	-0.179676	-0.640763	0.138847	-0.564683	-0.0436926	0	NA	NA	0.04133	-8.05116
71	1434	Nillson_TopS	1434	1435	NA	-1.06521	-0.128066	2.05874	0.11453	-0.632924	0.385445	-0.936112	0.217729	1.16309	0.620036	-0.530987	0.156509	-0.432485	0	16380.3	17094.9	-7.2091	4.52457
81	1435	Nillson_TopS	1435	1436	NA	0.498527	0.373444	-0.596809	-0.161847	0.98046	-0.692977	0.573131	0.430963	0.232676	-0.742068	-0.297881	-0.106889	-0.17759	0	NA	NA	3.47305	-13.3053
91	1436	Nillson_TopS	1436	1437	NA	0.301889	-0.861525	0.166294	1.18616	-1.0626	-0.12482	0.357642	-0.462817	0.115765	0.0761104	0.442437	0.4983	-0.165509	0	-7557.7	16063.8	-3.17219	1.32407
74	1437	Nillson_TopS	1437	1438	NA	-0.992638	0.865367	-0.197568	-0.352397	1.39052	0.411934	0.472507	-1.91273	-0.126302	1.0871	1.05072	0.127839	-0.780106	0	-956.584	-26670.3	10.1585	-18.3044
76	1438	Nillson_TopS	1438	1439	NA	-1.2363	-0.471393	0.953948	0.271403	-0.745564	-0.273324	0.543349	1.04525	0.325449	0.114054	-0.212553	0.539592	-0.195182	0	-4980.99	28951	-3.9653	1.78471
81	1439	Nillson_TopS	1439	1440	NA	0.868273	0.555646	-0.742238	-0.25224	1.09963	-0.474415	0.369335	0.707369	-0.00981425	-0.732621	-0.281851	-0.516391	-0.191096	0	NA	NA	3.47305	-13.3053
96	1440	Nillson_TopS	1440	1441	NA	-0.45387	0.698327	-0.3714	-0.0755227	1.21982	-0.943403	0.51817	0.792539	0.0768062	-0.439019	0.051214	-0.194423	-0.495501	0	-35762.4	-20639.6	5.64891	-15.0421
81	1441	Nillson_TopS	1441	1442	NA	0.525664	0.385993	-0.602787	-0.16789	0.973743	-0.770184	0.567338	0.623866	-0.00406564	-0.812198	-0.0707935	-0.0626389	-0.239559	0	NA	NA	3.47305	-13.3053
71	1442	Nillson_TopS	1442	1443	NA	-0.954091	-0.300756	2.23947	-0.300855	-0.702582	-0.192975	-0.457348	0.206501	1.27798	0.0531064	-0.661807	0.447816	0.154105	0	NA	NA	-7.2091	4.52457
90	1443	Nillson_TopS	1443	1444	NA	1.36346	0.234174	-0.877162	0.01868	0.75871	-0.482045	0.471291	-0.264524	0.238822	-0.978716	-0.410556	-0.063436	0.453013	0	NA	NA	0.04133	-8.05116
87	1444	Nillson_TopS	1444	1445	NA	1.17648	-0.0939688	-0.667718	-0.254791	0.392591	-0.410171	-0.0975778	0.854124	-0.311656	-0.552059	0.428202	-0.376082	0.234336	0	NA	NA	-2.80321	-1.98428
71	1445	Nillson_TopS	1445	1446	NA	-1.45565	-0.259235	3.30262	-0.347636	-0.748096	-0.47418	-0.412362	0.143364	1.72427	-0.309694	-0.471825	0.470655	0.195524	0	NA	NA	-7.2091	4.52457
87	1446	Nillson_TopS	1446	1447	NA	1.28039	-0.313476	-0.558423	-0.198645	0.395463	-0.326522	0.186886	0.38524	-0.130752	-0.913706	0.202196	-0.147162	0.444518	0	NA	NA	-2.80321	-1.98428
79	1447	Nillson_TopS	1447	1448	NA	0.180357	0.461859	0.094456	-0.646867	-1.12218	2.74991	-0.842503	-2.12599	-0.401851	2.38706	-0.588834	1.12023	0.899423	0	61243.3	-10857.2	-2.18619	19.1368
101	1448	Nillson_TopS	1448	1449	NA	1.09245	0.580684	-1.44825	-0.534971	1.08755	-0.455125	0.545994	0.652445	-0.124519	-0.700214	0.163466	-0.208582	0.26211	0	NA	NA	1.66122	-10.7159
94	1449	Nillson_TopS	1449	1450	NA	-1.1065	0.535936	-0.0548839	-0.864962	1.05324	0.679153	0.0833843	-2.20193	-0.141584	1.22681	2.99552	0.242512	-0.830487	0	NA	NA	11.5245	-18.2658
101	1450	Nillson_TopS	1450	1451	NA	0.865279	0.592787	-0.822656	-0.0511944	1.05607	-0.586038	0.501081	-0.0502835	0.0974874	-0.818313	-0.0280885	-0.397101	0.0269917	0	NA	NA	1.66122	-10.7159
94	1451	Nillson_TopS	1451	1452	NA	-0.788593	1.329	-0.700336	-0.267988	1.7784	0.406091	0.843376	-2.51008	0.200472	0.889778	0.884221	0.105521	-0.706737	0	-1814.59	-26638.3	11.5245	-18.2658
81	1452	Nillson_TopS	1452	1453	NA	0.626218	0.852703	-0.686233	-0.323305	1.3672	-0.764288	0.532163	0.251127	0.0428046	-0.733144	0.0538898	-0.544828	-0.214949	0	-40562.2	-22223.3	3.47305	-13.3053
90	1453	Nillson_TopS	1453	1454	NA	1.05293	0.172193	-0.513106	-0.479936	0.572504	-0.639658	0.312131	0.381539	0.0542022	-0.644361	-0.044148	-0.214275	0.273533	0	NA	NA	0.04133	-8.05116
90	1454	Nillson_TopS	1454	1455	NA	1.3103	0.338869	-0.310311	-0.0858494	0.563738	-0.423207	0.118543	0.323425	-0.258511	-0.741988	-0.43324	-0.407068	0.293355	0	NA	NA	0.04133	-8.05116
90	1455	Nillson_TopS	1455	1456	NA	1.26958	0.18806	-0.528848	0.368099	0.770122	-0.387009	0.179982	0.372364	-0.246324	-0.967273	-0.235097	-0.642438	0.217164	0	NA	NA	0.04133	-8.05116
101	1456	Nillson_TopS	1456	1457	NA	0.930353	0.423833	-0.836047	-0.227939	1.00683	-0.408822	0.364097	-0.286242	-0.0915028	-0.576199	0.361764	-0.37011	0.0480204	0	NA	NA	1.66122	-10.7159
97	1457	Nillson_TopS	1457	1458	NA	-0.671436	-0.597539	0.783617	-0.575275	-1.44621	1.33358	-0.929502	-0.367538	-1.12074	2.15962	1.90259	0.987665	0.154534	0	38528.5	-13972.2	-0.640634	29.6106
78	1458	Nillson_TopS	1458	1459	NA	1.34843	0.200749	-0.564526	-0.0841405	0.318112	-0.332676	0.0162251	0.111491	-0.172477	-0.57927	-0.197759	-0.286899	0.466693	0	-52606.7	-26647.2	-1.47521	-5.09834
90	1459	Nillson_TopS	1459	1460	NA	1.34502	0.220599	-0.724048	0.00691454	0.812566	-0.350956	0.317907	0.0991053	0.00945434	-0.825416	-0.603416	-0.379346	0.44884	0	NA	NA	0.04133	-8.05116
82	1460	Nillson_TopS	1460	1461	NA	-0.607777	0.0961938	-0.135573	0.761489	-0.0508929	-0.554819	0.796634	-1.16077	1.14723	-0.432732	-0.977501	1.47202	0.161996	0	4932.11	13464	-2.09482	14.9584
90	1461	Nillson_TopS	1461	1462	NA	1.37633	0.0269695	-0.654069	-0.029249	0.535549	-0.332871	0.168012	0.546313	-0.165806	-0.865626	-0.317139	-0.383783	0.445337	0	NA	NA	0.04133	-8.05116
96	1462	Nillson_TopS	1462	1463	NA	-0.203691	0.772389	-0.646394	-0.287989	1.28945	-1.02049	0.788231	0.709845	0.30849	-0.511538	0.259922	-0.162158	-0.748389	0	-35935.4	-20897.6	5.64891	-15.0421
94	1463	Nillson_TopS	1463	1464	NA	-0.808338	-0.0576657	-0.123211	0.445941	0.352644	0.540238	-0.343641	-1.08656	-0.783259	1.22433	1.91182	-0.00596766	-0.625443	0	1139.34	-22525.6	11.5245	-18.2658
88	1464	Nillson_TopS	1464	1465	NA	-0.577681	0.146097	0.100468	-0.772102	-1.17524	1.64283	-1.40976	-0.956001	0.432156	1.33986	2.10001	0.257386	0.114177	0	54435.4	-17043.2	-1.47868	23.5644
100	1465	Nillson_TopS	1465	1466	NA	-0.796638	-0.927202	0.87894	-0.697232	-1.30713	1.07292	-1.19397	0.38711	-0.946057	1.91966	2.66622	0.710097	-0.0697099	0	32243.6	-14218.3	-0.457409	31.025
94	1466	Nillson_TopS	1466	1467	NA	-1.11668	0.42444	0.598903	-0.521533	0.968618	0.417267	0.135125	-2.28521	-0.0409952	0.944844	2.15203	0.29098	-0.675257	0	4164.93	-22900.3	11.5245	-18.2658
101	1467	Nillson_TopS	1467	1468	NA	0.974243	0.527736	-0.533278	-0.0826241	0.990605	-0.538342	0.248916	0.262091	-0.197844	-0.91866	0.168393	-0.666279	0.103529	0	NA	NA	1.66122	-10.7159
101	1468	Nillson_TopS	1468	1469	NA	1.0521	0.456703	-1.18709	-0.330838	0.890695	-0.335601	0.331529	0.171526	-0.0482259	-0.543326	0.298899	-0.364011	0.0879536	0	-44620.8	-24897	1.66122	-10.7159
81	1469	Nillson_TopS	1469	1470	NA	0.452621	0.511711	-0.649518	-0.0942636	0.89222	-0.659001	0.380692	0.0241522	0.20394	-0.578141	0.115797	-0.0934206	-0.254198	0	NA	NA	3.47305	-13.3053
90	1470	Nillson_TopS	1470	1471	NA	1.33086	0.186646	-0.533213	-0.236806	0.569071	-0.323054	0.180623	0.637524	-0.31631	-0.671652	-0.431065	-0.41423	0.344556	0	NA	NA	0.04133	-8.05116
90	1471	Nillson_TopS	1471	1472	NA	1.12525	0.249029	-1.01204	-0.112938	1.02956	-0.40759	0.337304	0.73993	0.0655595	-0.654248	-0.190184	-0.79617	0.136112	0	-45814.6	-24568.1	0.04133	-8.05116
90	1472	Nillson_TopS	1472	1473	NA	1.31709	0.380692	-0.658429	0.31031	0.950046	-0.424294	0.254828	0.0959363	-0.142817	-0.957145	-0.385175	-0.576319	0.232081	0	NA	NA	0.04133	-8.05116
90	1473	Nillson_TopS	1473	1474	NA	0.788425	-0.112131	-0.465542	0.292834	0.336442	-0.533705	0.268961	0.556484	0.132286	-0.889281	0.0731159	-0.0795904	-0.14051	0	NA	NA	0.04133	-8.05116
87	1474	Nillson_TopS	1474	1475	NA	1.45216	-0.0613463	-0.466642	0.527742	0.216555	-0.350074	0.0345539	0.389623	-0.167846	-0.996393	-0.276323	-0.396485	0.429028	0	-52759.8	-27893.7	-2.80321	-1.98428
90	1475	Nillson_TopS	1475	1476	NA	1.19714	-0.00488841	-0.938826	-0.227971	0.548832	-0.493869	0.477432	0.551563	0.0323321	-0.852509	-0.0746682	-0.11222	0.314026	0	NA	NA	0.04133	-8.05116
101	1476	Nillson_TopS	1476	1477	NA	0.857182	0.421133	-0.755427	-0.361311	1.00618	-0.533916	0.441507	0.189993	0.0890638	-0.707045	0.208396	-0.391617	-0.116934	0	NA	NA	1.66122	-10.7159
69	1477	Nillson_TopS	1477	1478	NA	-0.249515	0.455696	0.822237	-0.813124	-0.612667	2.15647	-1.10969	-1.86876	1.00563	1.93516	-1.2744	0.771482	0.567923	0	58302.8	-3547.02	-2.63306	16.7582
90	1478	Nillson_TopS	1478	1479	NA	1.15269	0.335464	-0.195309	0.104386	0.817762	-0.515336	0.114742	0.275262	-0.284696	-0.817269	-0.0794494	-0.761103	0.172649	0	NA	NA	0.04133	-8.05116
90	1479	Nillson_TopS	1479	1480	NA	1.38351	0.287646	-0.541563	0.352525	0.827725	-0.284551	0.2466	-0.105676	-0.249497	-1.04857	-0.35655	-0.456415	0.312396	0	NA	NA	0.04133	-8.05116
103	1480	Nillson_TopS	1480	1481	NA	-0.0645384	-0.0547549	-0.165189	-0.713475	-0.82676	2.34285	-1.03529	-1.65064	-0.656209	2.43056	-0.0678274	1.09023	0.869672	0	59713.8	-11516.1	-1.77317	21.6487
90	1481	Nillson_TopS	1481	1482	NA	1.5464	0.232499	-0.699643	0.0539012	0.660687	-0.324537	0.251144	0.138118	-0.116106	-1.04027	-0.363299	-0.47679	0.558854	0	NA	NA	0.04133	-8.05116
90	1482	Nillson_TopS	1482	1483	NA	1.30803	0.115876	-0.732184	-0.0866689	0.823178	-0.340217	0.302618	0.532925	-0.253087	-0.899171	-0.248095	-0.415643	0.290404	0	NA	NA	0.04133	-8.05116
88	1483	Nillson_TopS	1483	1484	NA	-0.36848	0.48995	0.00900082	-0.840805	-1.14526	2.00567	-1.38271	-0.823559	0.459574	1.093	1.36246	0.0657103	0.219257	0	55969.5	-15701.7	-1.47868	23.5644
96	1484	Nillson_TopS	1484	1485	NA	0.355704	1.21741	-0.748149	-0.362243	1.60856	-0.774102	0.666263	0.567392	0.000619584	-0.73483	-0.182144	-0.668165	-0.384191	0	-38198.6	-21362.5	5.64891	-15.0421
78	1485	Nillson_TopS	1485	1486	NA	1.79358	-0.191071	-0.632994	0.409047	0.331513	-0.279647	0.134451	-0.0362551	-0.167234	-1.04813	0.0066637	-0.504002	0.631829	0	-53700.7	-28014.8	-1.47521	-5.09834
68	1486	Nillson_TopS	1486	1487	NA	-1.15499	0.299512	1.75504	0.928064	-0.846349	0.0441827	-0.846371	-0.0988545	0.131303	0.917493	-0.600902	0.700286	-0.221566	0	NA	NA	-7.16747	12.5824
90	1487	Nillson_TopS	1487	1488	NA	1.04144	0.129756	-0.270359	-0.121492	0.625903	-0.52083	0.139079	0.771387	-0.25692	-0.896175	0.216728	-0.66758	0.114058	0	NA	NA	0.04133	-8.05116
90	1488	Nillson_TopS	1488	1489	NA	0.707612	0.132005	-0.15934	0.497641	0.702359	-0.824523	0.417374	0.329211	0.14744	-0.979178	-0.314769	-0.249135	-0.109506	0	NA	NA	0.04133	-8.05116
103	1489	Nillson_TopS	1489	1490	NA	-0.226042	-0.181694	0.787576	-0.643807	-1.26738	2.09618	-1.00575	-1.96413	-0.332268	2.2923	0.817912	1.03547	0.444895	0	54265.5	-12413.5	-1.77317	21.6487
74	1490	Nillson_TopS	1490	1491	NA	-1.09522	0.830462	-0.0434918	-0.0505455	1.36318	0.223157	0.446996	-1.74432	-0.137025	0.819897	1.43935	-0.115069	-1.06411	0	-1253.8	-25907	10.1585	-18.3044
101	1491	Nillson_TopS	1491	1492	NA	1.26984	0.472835	-0.60593	-0.162105	0.878124	-0.584581	0.178367	0.28957	-0.240381	-0.710924	0.0896395	-0.714902	0.22171	0	NA	NA	1.66122	-10.7159
101	1492	Nillson_TopS	1492	1493	NA	0.779672	0.311175	-0.279694	-0.302343	0.975948	-0.576165	0.169981	0.396395	-0.00788258	-0.713256	0.0960307	-0.516333	-0.0662258	0	-43296.9	-23911.9	1.66122	-10.7159
100	1493	Nillson_TopS	1493	1494	NA	-0.987321	-0.804395	0.690308	-0.675414	-1.5943	1.22606	-1.35627	0.655991	-0.660191	1.96512	3.20729	0.70138	-0.232151	0	31270.7	-14520.6	-0.457409	31.025
81	1494	Nillson_TopS	1494	1495	NA	0.442304	0.598491	-0.537898	-0.388386	1.14328	-0.683428	0.521234	0.853931	-0.0578664	-0.571808	-0.399653	-0.301555	-0.232611	0	NA	NA	3.47305	-13.3053
88	1495	Nillson_TopS	1495	1496	NA	-0.1927	0.432388	-0.00302228	-0.870642	-0.972283	2.15493	-1.35142	-1.79459	0.457611	1.40983	1.482	0.259748	0.44703	0	55765.3	-15238.5	-1.47868	23.5644
90	1496	Nillson_TopS	1496	1497	NA	1.02875	0.0296728	-0.381423	-0.277636	0.42874	-0.436748	0.340132	0.329458	0.0609345	-0.793068	-0.118546	-0.176638	0.17797	0	NA	NA	0.04133	-8.05116
87	1497	Nillson_TopS	1497	1498	NA	1.36222	-0.226052	-0.378875	0.301041	0.0495535	-0.395678	0.0291365	0.566704	-0.271078	-0.871575	0.140474	-0.322434	0.30238	0	NA	NA	-2.80321	-1.98428
90	1498	Nillson_TopS	1498	1499	NA	1.32123	-0.1542	-0.750268	-0.118351	0.264337	-0.397594	0.0329245	0.670677	-0.216694	-0.637223	0.545945	-0.573265	0.363397	0	NA	NA	0.04133	-8.05116
94	1499	Nillson_TopS	1499	1500	NA	-1.15857	0.652007	0.311391	-0.576378	1.15341	0.318306	0.283368	-2.50378	0.113345	0.845334	3.0068	0.155417	-0.860473	0	NA	NA	11.5245	-18.2658
78	1500	Nillson_TopS	1500	1501	NA	1.71496	-0.0278568	-0.455902	0.187245	0.397072	-0.197148	0.160286	-0.11788	-0.0741582	-1.11098	-0.547715	-0.263581	0.768305	0	NA	NA	-1.47521	-5.09834
78	1501	Nillson_TopS	1501	1502	NA	1.51305	-0.057322	-0.0910247	0.114685	0.427812	-0.232468	-0.0530525	0.0136733	-0.229149	-0.954511	-0.12601	-0.359864	0.324173	0	-52996.8	-27595.9	-1.47521	-5.09834
87	1502	Nillson_TopS	1502	1503	NA	1.9288	-0.513635	-0.286206	0.313517	0.0190154	-0.128948	0.0506906	0.449538	-0.39956	-1.05983	-0.116013	-0.587389	0.827746	0	NA	NA	-2.80321	-1.98428
104	1503	Nillson_TopS	1503	1504	NA	-0.227149	-0.303593	-0.283821	-0.604737	-1.22141	2.09381	-1.20071	-1.87265	-0.65871	2.42818	2.33502	1.09169	0.719414	0	48470.8	-14684.8	-1.20331	25.4698
101	1504	Nillson_TopS	1504	1505	NA	0.946974	0.346872	-0.982604	-0.00561888	1.04107	-0.491498	0.401981	0.268217	-0.0343654	-0.528382	0.120732	-0.61182	-0.0481829	0	-44399.4	-24659.8	1.66122	-10.7159
101	1505	Nillson_TopS	1505	1506	NA	1.30237	0.561226	-0.987094	0.0709281	1.00932	-0.495654	0.366631	0.233495	-0.0855512	-0.797334	-0.3516	-0.636872	0.327975	0	NA	NA	1.66122	-10.7159
90	1506	Nillson_TopS	1506	1507	NA	1.48525	0.141281	-0.468663	-0.0672099	0.616833	-0.412205	0.192691	0.275012	-0.204144	-0.904058	-0.345121	-0.389884	0.424677	0	NA	NA	0.04133	-8.05116
90	1507	Nillson_TopS	1507	1508	NA	1.43469	0.450649	-0.866735	0.0479651	0.753649	-0.37281	0.314286	-0.0797834	-0.163745	-0.859	-0.22327	-0.593507	0.598694	0	-50193.9	-25180.6	0.04133	-8.05116
81	1508	Nillson_TopS	1508	1509	NA	0.24612	0.682572	-0.28934	-0.267712	1.17647	-0.777683	0.548211	0.730087	0.0791555	-0.623537	-0.14821	-0.340089	-0.640554	0	-37785	-21254	3.47305	-13.3053
83	1509	Nillson_TopS	1509	1510	NA	-0.589207	-0.873549	0.980684	-0.349995	-1.36217	1.42455	-1.43841	-1.14279	-0.342328	2.29279	2.57059	0.846365	0.0381688	0	40086.8	-15091.5	-0.90395	27.6653
74	1510	Nillson_TopS	1510	1511	NA	-1.02686	0.826156	-0.421409	-0.264688	1.23738	0.351063	0.413383	-1.6721	-0.211795	1.004	1.31987	-0.0282031	-0.692623	0	-1061.18	-26409.8	10.1585	-18.3044
81	1511	Nillson_TopS	1511	1512	NA	0.582641	0.0131004	-0.589225	-0.487741	0.484993	-0.56103	0.368511	0.444711	0.0341701	-0.365026	0.509859	-0.0052028	-0.208179	0	NA	NA	3.47305	-13.3053
101	1512	Nillson_TopS	1512	1513	NA	0.805477	0.577457	-0.641299	-0.123914	1.05319	-0.434769	0.284553	0.468962	-0.100579	-0.680618	0.038858	-0.644311	-0.26077	0	NA	NA	1.66122	-10.7159
101	1513	Nillson_TopS	1513	1514	NA	0.994106	0.407197	-0.543445	-0.0834498	0.981337	-0.611505	0.407795	0.423507	0.0938378	-0.917648	-0.630281	-0.319004	0.176419	0	-46385.7	-23149.6	1.66122	-10.7159
90	1514	Nillson_TopS	1514	1515	NA	1.03896	0.735015	-0.784312	-0.061616	1.2447	-0.50535	0.29351	-0.332013	-0.0304327	-0.641564	-0.00706042	-0.669728	0.138453	0	NA	NA	0.04133	-8.05116
101	1515	Nillson_TopS	1515	1516	NA	1.02539	0.062335	-0.588542	-0.361719	0.702739	-0.354724	0.331611	0.356098	-0.0784178	-0.596049	-0.19097	-0.145067	0.0757452	0	NA	NA	1.66122	-10.7159
90	1516	Nillson_TopS	1516	1517	NA	1.29186	0.177625	-0.438062	0.603665	0.60171	-0.44614	0.195414	-0.0469543	-0.258668	-0.974307	-0.171345	-0.388977	0.186644	0	NA	NA	0.04133	-8.05116
90	1517	Nillson_TopS	1517	1518	NA	1.09713	0.31149	-0.748001	0.111954	0.903039	-0.458661	0.29719	0.462622	-0.179694	-0.787753	-0.133259	-0.656153	0.152378	0	NA	NA	0.04133	-8.05116
96	1518	Nillson_TopS	1518	1519	NA	0.0648587	0.919271	-0.783578	-0.528961	1.43998	-0.652524	0.569353	0.461435	0.260203	-0.473686	0.257193	-0.46027	-0.562036	0	NA	NA	5.64891	-15.0421
88	1519	Nillson_TopS	1519	1520	NA	-0.605136	0.0394102	0.164488	-1.00393	-1.31163	1.76476	-1.39797	-0.317215	0.155203	1.53388	1.94676	0.304163	-0.0043654	0	54427.7	-16630.8	-1.47868	23.5644
87	1520	Nillson_TopS	1520	1521	NA	1.03366	-0.0568051	-0.506921	0.180689	0.202311	-0.600854	0.446089	0.0902085	0.209856	-0.589106	-0.349072	-0.0228572	0.178112	0	NA	NA	-2.80321	-1.98428
87	1521	Nillson_TopS	1521	1522	NA	1.67603	0.0850134	-0.486737	0.131121	0.401943	-0.12684	-0.0520291	0.463942	-0.435713	-0.877324	-0.235782	-0.836164	0.705814	0	NA	NA	-2.80321	-1.98428
79	1522	Nillson_TopS	1522	1523	NA	-0.0512868	0.314493	0.578905	-0.616087	-1.11967	2.407	-0.801212	-1.88418	-0.515386	2.58429	-0.890747	1.20555	0.682376	0	61816.6	-10103.4	-2.18619	19.1368
101	1523	Nillson_TopS	1523	1524	NA	0.932269	0.719274	-1.07672	-0.367584	1.37969	-0.563996	0.468691	0.594169	-0.017506	-0.712589	-0.00791786	-0.83051	0.113969	0	-43216.2	-23515.2	1.66122	-10.7159
90	1524	Nillson_TopS	1524	1525	NA	1.42539	0.150593	-0.658272	0.308723	0.663103	-0.391447	0.0725259	0.184174	-0.184994	-0.755767	-0.22538	-0.581403	0.345671	0	NA	NA	0.04133	-8.05116
81	1525	Nillson_TopS	1525	1526	NA	0.586875	0.915371	-0.448609	-0.325213	1.39851	-0.770443	0.578181	0.715569	0.0695651	-0.63477	-0.75425	-0.492237	-0.334505	0	NA	NA	3.47305	-13.3053
101	1526	Nillson_TopS	1526	1527	NA	0.897669	0.710327	-0.543882	-0.25543	1.23836	-0.619116	0.591027	0.367486	-0.147401	-0.79013	-0.302497	-0.627907	-0.100577	0	NA	NA	1.66122	-10.7159
87	1527	Nillson_TopS	1527	1528	NA	1.69871	-0.335141	-0.261499	0.497617	0.0926645	-0.270096	-0.0994182	0.170358	-0.182252	-0.74062	-0.0310066	-0.670452	0.488072	0	NA	NA	-2.80321	-1.98428
90	1528	Nillson_TopS	1528	1529	NA	1.06498	0.186748	-0.760759	-0.188281	0.716974	-0.408704	0.263327	0.530803	-0.0148989	-0.800688	-0.0157695	-0.314851	0.0608702	0	-46767.5	-25427.3	0.04133	-8.05116
90	1529	Nillson_TopS	1529	1530	NA	1.54964	0.0969227	-0.536233	-0.0600801	0.624074	-0.324303	0.194794	0.465494	-0.45991	-0.977329	0.019267	-0.69759	0.529899	0	NA	NA	0.04133	-8.05116
83	1530	Nillson_TopS	1530	1531	NA	-0.296364	-0.63364	0.0746501	-0.407808	-1.36259	1.95528	-0.710314	-1.56011	-0.865015	2.90316	1.14544	1.43996	0.301304	0	48134.4	-13167.1	-0.90395	27.6653
94	1531	Nillson_TopS	1531	1532	NA	-0.616139	0.250576	-0.314879	0.16783	0.718535	0.292854	-0.0707245	-0.0707635	-0.619259	0.785003	1.01212	-0.23639	-0.963046	0	-6292.02	-20957.9	11.5245	-18.2658
95	1532	Nillson_TopS	1532	1533	NA	-1.13566	0.0027822	1.75173	0.0568477	-0.184531	-0.331198	-0.0916757	0.62041	0.846311	-0.0567949	-0.328378	0.00491771	-0.499475	0	11999.2	16088	-5.89098	4.66014
72	1533	Nillson_TopS	1533	1534	NA	-0.194105	0.310332	-0.307724	0.019069	0.753456	-0.182138	0.0185648	0.0717734	-0.559364	0.401724	1.27307	-0.506158	-0.807844	0	-10035.6	-21290.9	8.83648	-17.3626
69	1534	Nillson_TopS	1534	1535	NA	-0.0420511	0.730072	-0.131796	-0.661522	-0.715763	2.42482	-1.08915	-1.7127	1.12423	1.75007	-1.28234	0.634833	0.542735	0	59763.2	-4057.81	-2.63306	16.7582
68	1535	Nillson_TopS	1535	1536	NA	-0.84011	0.0964908	1.56553	0.415844	-0.595091	-0.127129	-0.0782659	0.800226	0.0561717	0.403233	-0.322143	0.126104	-0.815749	0	14806.3	22515.4	-7.16747	12.5824
90	1536	Nillson_TopS	1536	1537	NA	1.30909	0.118865	-0.652633	-0.27045	0.663414	-0.33282	0.438772	0.281299	0.116279	-0.841009	-0.288471	-0.482931	0.282201	0	-49046.2	-24820.7	0.04133	-8.05116
101	1537	Nillson_TopS	1537	1538	NA	0.916834	0.383801	-0.795795	-0.406246	0.993268	-0.446725	0.646439	0.476896	0.222892	-0.781239	-0.704739	-0.0644916	0.00408936	0	NA	NA	1.66122	-10.7159
87	1538	Nillson_TopS	1538	1539	NA	1.13749	-0.445689	-0.613303	0.138709	0.204504	-0.47998	0.2961	1.13922	-0.0468867	-0.793189	0.145484	-0.326617	-0.00171833	0	NA	NA	-2.80321	-1.98428
69	1539	Nillson_TopS	1539	1540	NA	-0.223796	0.32432	0.209035	-0.609362	-0.729883	2.15756	-0.66986	-1.75632	0.681784	2.0786	-1.26531	0.866045	0.445784	0	59954.5	-4328.6	-2.63306	16.7582
94	1540	Nillson_TopS	1540	1541	NA	-0.952672	0.399841	0.0268123	-0.728876	0.788968	0.648186	-0.0171161	-2.33338	-0.0192761	1.38408	2.64026	0.250668	-0.316942	0	NA	NA	11.5245	-18.2658
74	1541	Nillson_TopS	1541	1542	NA	-0.872446	0.682393	-0.456861	0.420322	1.10662	0.177926	0.0777205	-0.727501	-0.322204	0.645191	0.914719	-0.196647	-1.01161	0	-4789.39	-23739.7	10.1585	-18.3044
87	1542	Nillson_TopS	1542	1543	NA	1.31394	-0.280219	-0.824863	0.136015	0.237477	-0.310167	0.242518	0.506556	0.0482346	-0.754302	-0.254637	-0.0448193	0.320173	0	NA	NA	-2.80321	-1.98428
90	1543	Nillson_TopS	1543	1544	NA	1.25432	0.147674	-0.939316	-0.17434	0.601354	-0.21898	0.336246	0.38189	-0.117733	-0.810474	-0.197349	-0.2236	0.349395	0	NA	NA	0.04133	-8.05116
81	1544	Nillson_TopS	1544	1545	NA	0.678683	0.88327	-0.756329	-0.0750103	1.44932	-0.603678	0.419519	0.431738	-0.120629	-0.66017	0.0524052	-0.804443	-0.385423	0	NA	NA	3.47305	-13.3053
78	1545	Nillson_TopS	1545	1546	NA	1.36814	0.0714643	-0.694372	0.132736	0.387859	-0.254266	0.0856541	0.571532	-0.102654	-0.761571	-0.278708	-0.507364	0.304966	0	NA	NA	-1.47521	-5.09834
101	1546	Nillson_TopS	1546	1547	NA	0.994981	0.433323	-0.223594	-0.0907976	0.856545	-0.769447	0.264253	0.120131	-0.243627	-0.739111	0.118844	-0.46834	0.0455742	0	-45148.6	-24559.2	1.66122	-10.7159
78	1547	Nillson_TopS	1547	1548	NA	1.64236	0.125347	-0.756219	0.213289	0.532959	-0.238792	-0.0011256	0.366932	-0.307776	-1.03433	-0.181314	-0.570907	0.701098	0	-52790.9	-27733.5	-1.47521	-5.09834
81	1548	Nillson_TopS	1548	1549	NA	0.661723	0.996321	-0.837588	-0.347705	1.55989	-0.696368	0.669354	0.284856	0.239057	-0.619234	-0.554184	-0.470982	-0.316515	0	NA	NA	3.47305	-13.3053
78	1549	Nillson_TopS	1549	1550	NA	1.76419	-0.122083	-0.710265	0.208184	0.365155	-0.271201	0.117924	0.0477223	-0.125119	-0.971542	-0.30248	-0.289747	0.706851	0	-53993.9	-27138	-1.47521	-5.09834
90	1550	Nillson_TopS	1550	1551	NA	1.19173	-0.0561583	0.0390918	-0.168232	0.260593	-0.332718	0.0718163	0.285295	-0.0830303	-0.607428	-0.360839	-0.393694	0.33242	0	NA	NA	0.04133	-8.05116
81	1551	Nillson_TopS	1551	1552	NA	0.794799	0.271693	-0.380118	0.0407138	0.701848	-0.559869	0.14097	0.5707	-0.452432	-0.522465	0.461572	-0.604204	-0.199393	0	-42782.8	-25192.1	3.47305	-13.3053
83	1552	Nillson_TopS	1552	1553	NA	-0.723937	-0.604553	1.19127	-0.436985	-1.30619	1.459	-1.24391	-1.93353	-0.363336	2.19958	3.06867	0.95201	0.151194	0	41038.2	-15137.2	-0.90395	27.6653
92	1553	Nillson_TopS	1553	1554	NA	0.00335862	1.29738	-0.349896	-0.320845	1.87574	-0.713344	0.910707	0.160117	0.153783	-0.572705	-0.557969	-0.62282	-0.643322	0	-37892.5	-19872.2	2.70687	-14.5254
101	1554	Nillson_TopS	1554	1555	NA	0.71604	0.40629	-0.647201	-0.421171	0.963428	-0.677569	0.537603	1.03065	0.109348	-0.77271	-0.502336	-0.317582	0.015756	0	NA	NA	1.66122	-10.7159
90	1555	Nillson_TopS	1555	1556	NA	1.42984	0.336693	-0.679948	0.451751	0.729	-0.370677	0.241491	0.342118	-0.095078	-1.07242	-0.649242	-0.556449	0.381623	0	NA	NA	0.04133	-8.05116
90	1556	Nillson_TopS	1556	1557	NA	1.20123	0.0589169	-0.563677	-0.154521	0.446873	-0.36774	0.193054	0.562585	-0.33657	-0.799208	0.209456	-0.392361	0.208402	0	NA	NA	0.04133	-8.05116
91	1557	Nillson_TopS	1557	1558	NA	0.527367	-0.830077	-0.0478501	0.630718	-1.23444	-0.0128104	0.262019	-0.461181	0.172911	0.343851	0.497821	0.490959	0.13963	0	-8083.85	15076.5	-3.17219	1.32407
101	1558	Nillson_TopS	1558	1559	NA	0.997972	0.268835	-0.618706	-0.222403	0.945685	-0.717262	0.602216	0.110711	0.0985132	-0.782285	-0.305461	-0.213832	0.196124	0	-45839.9	-23594.6	1.66122	-10.7159
94	1559	Nillson_TopS	1559	1560	NA	-1.1701	0.217766	-0.172191	0.390431	0.703495	0.519624	-0.150038	-1.24995	-0.647119	1.10977	2.1177	0.0352155	-0.90414	0	NA	NA	11.5245	-18.2658
76	1560	Nillson_TopS	1560	1561	NA	-1.26225	-0.829949	-0.443335	0.109285	-1.50083	0.37768	0.451381	1.20276	0.587133	0.780028	1.26058	0.722665	-0.232031	0	-7095.7	26752.7	-3.9653	1.78471
93	1561	Nillson_TopS	1561	1562	NA	-1.45907	-0.459581	0.615806	0.689802	-0.712601	0.211742	0.384652	1.44298	0.207805	0.92143	-0.830268	0.579673	-0.665198	0	-4373.41	33634.8	-4.40299	4.80104
94	1562	Nillson_TopS	1562	1563	NA	-0.554906	0.498225	-0.32302	-0.304233	0.862576	0.349855	0.0125084	-1.55697	-0.482979	0.961671	1.98703	0.0635193	-0.772174	0	1908.9	-24724.3	11.5245	-18.2658
80	1563	Nillson_TopS	1563	1564	NA	-0.991327	-0.67045	0.310676	0.548327	-0.9045	0.470496	0.610828	-0.608016	0.496197	0.858834	-0.954504	0.945127	0.659081	1	5472.01	38449.7	-4.13488	11.909
74	1564	Nillson_TopS	1564	1565	NA	-1.01619	1.04519	-0.138503	-0.129504	1.4626	0.116255	0.555038	-1.69816	-0.0314189	0.675313	1.03189	-0.155632	-0.949123	0	-1883.53	-26213.6	10.1585	-18.3044
87	1565	Nillson_TopS	1565	1566	NA	1.62592	-0.181879	-0.637222	0.26156	0.115403	-0.189939	0.0530951	0.0723241	-0.0264397	-0.927826	-0.270658	-0.267043	0.719355	0	-54039.9	-27964.5	-2.80321	-1.98428
90	1566	Nillson_TopS	1566	1567	NA	1.27378	0.0774963	-0.343298	-0.0550635	0.635511	-0.432061	0.282739	0.637209	-0.178651	-0.93226	-0.250262	-0.526446	0.1463	0	NA	NA	0.04133	-8.05116
90	1567	Nillson_TopS	1567	1568	NA	1.31619	-0.233496	-0.577934	0.0116214	0.246175	-0.35211	0.193191	0.391664	0.0136546	-1.03975	0.315356	-0.306043	0.355987	0	NA	NA	0.04133	-8.05116
90	1568	Nillson_TopS	1568	1569	NA	1.07674	0.0787535	-0.480992	-0.235823	0.588198	-0.483038	0.378805	0.54962	-0.0784064	-0.926124	-0.281456	-0.122775	0.219459	0	-47992.8	-25111.7	0.04133	-8.05116
87	1569	Nillson_TopS	1569	1570	NA	1.74549	-0.204884	-0.53901	0.164657	0.236132	-0.228112	0.00549122	0.54185	-0.381329	-0.73435	-0.325548	-0.507394	0.61404	0	NA	NA	-2.80321	-1.98428
90	1570	Nillson_TopS	1570	1571	NA	0.848869	0.151346	-0.670995	-0.359499	0.739237	-0.746462	0.297486	0.639266	-0.0970953	-0.689152	0.323871	-0.178213	0.0546756	0	NA	NA	0.04133	-8.05116
78	1571	Nillson_TopS	1571	1572	NA	1.40582	-0.139319	-0.467068	0.295096	0.0751485	-0.5286	0.0128129	0.870168	-0.248329	-0.787917	-0.123554	-0.340253	0.30621	0	-51130.4	-28567.8	-1.47521	-5.09834
81	1572	Nillson_TopS	1572	1573	NA	0.399365	0.999721	-0.576137	-0.412079	1.446	-0.59709	0.635015	0.175846	0.276388	-0.668117	-0.454387	-0.42874	-0.339207	0	NA	NA	3.47305	-13.3053
87	1573	Nillson_TopS	1573	1574	NA	1.88525	-0.442466	-0.644669	0.500747	0.0593407	-0.0507835	0.00323416	0.0543434	-0.486235	-0.830746	0.224042	-0.547461	0.729709	0	NA	NA	-2.80321	-1.98428
81	1574	Nillson_TopS	1574	1575	NA	0.908396	0.558815	-0.588636	-0.258945	1.14872	-0.524874	0.390915	0.0774135	-0.195907	-0.730163	0.329649	-0.5883	-0.163044	0	NA	NA	3.47305	-13.3053
90	1575	Nillson_TopS	1575	1576	NA	1.0897	0.171098	-0.373136	0.456866	0.642477	-0.567439	0.195388	0.277224	-0.053958	-0.994621	-0.097598	-0.474455	0.0267127	0	NA	NA	0.04133	-8.05116
90	1576	Nillson_TopS	1576	1577	NA	1.39124	0.292701	-0.625611	-0.100151	0.616384	-0.436578	0.147828	0.601567	-0.0886406	-0.922468	-0.359214	-0.521009	0.403597	0	-49854.6	-25647	0.04133	-8.05116
70	1577	Nillson_TopS	1577	1578	NA	-1.3297	-0.207121	1.58171	-0.452941	0.329064	-0.572893	0.224841	3.08257	0.615866	-0.217872	-1.04646	-0.317081	-0.441582	0	-10743.3	5127	-1.98822	5.2871
78	1578	Nillson_TopS	1578	1579	NA	1.50388	0.114234	-0.576612	0.218426	0.547324	-0.163911	0.0400065	0.355616	-0.247468	-0.961005	-0.369938	-0.5637	0.463205	0	NA	NA	-1.47521	-5.09834
81	1579	Nillson_TopS	1579	1580	NA	0.930528	0.807874	-0.885161	-0.226682	1.34066	-0.507203	0.584183	0.0380918	0.00930556	-0.807781	-0.196767	-0.602216	0.0195841	0	NA	NA	3.47305	-13.3053
87	1580	Nillson_TopS	1580	1581	NA	1.93368	-0.311157	-0.673219	0.380363	0.145912	0.0342679	-0.41616	0.464544	-0.662283	-0.797496	0.390641	-0.794121	0.85915	0	-51170.9	-30391.1	-2.80321	-1.98428
90	1581	Nillson_TopS	1581	1582	NA	1.10278	-0.200222	-0.246772	0.179711	0.276913	-0.449318	0.0297501	0.714978	-0.243115	-0.601386	-0.0564728	-0.464181	0.175381	0	NA	NA	0.04133	-8.05116
81	1582	Nillson_TopS	1582	1583	NA	0.610873	0.340854	-0.45453	-0.435899	0.799068	-0.566077	0.261683	0.799436	0.0322344	-0.495574	-0.152935	-0.368062	-0.114377	0	NA	NA	3.47305	-13.3053
81	1583	Nillson_TopS	1583	1584	NA	0.75628	0.986283	-0.662815	-0.0625741	1.41613	-0.550927	0.518957	0.0750566	-0.0477659	-0.804229	-0.339676	-0.660364	-0.147741	0	NA	NA	3.47305	-13.3053
87	1584	Nillson_TopS	1584	1585	NA	1.9871	-0.818531	-0.280685	0.537948	-0.512863	-0.0778349	-0.0760119	0.812892	-0.465763	-1.01673	-0.0727672	-0.28879	0.886001	0	NA	NA	-2.80321	-1.98428
68	1585	Nillson_TopS	1585	1586	NA	-1.10486	-0.0594738	1.55312	0.570135	-0.972208	0.298009	-0.633499	0.373036	0.0814363	0.88856	-0.480201	0.348528	-0.0436551	0	NA	NA	-7.16747	12.5824
79	1586	Nillson_TopS	1586	1587	NA	0.0528815	0.189634	-0.138539	-0.49804	-0.804702	2.38703	-0.820196	-1.79938	-0.685405	2.39847	-0.336408	0.975633	0.732819	0	60852.1	-11260.2	-2.18619	19.1368
88	1587	Nillson_TopS	1587	1588	NA	-0.567659	0.1651	0.530509	-0.920222	-0.999516	1.71896	-1.15191	-1.6245	0.537391	1.32173	1.92859	0.273481	0.134748	0	54519.5	-16265.2	-1.47868	23.5644
93	1588	Nillson_TopS	1588	1589	NA	-1.20002	-0.435362	0.796847	0.141618	-0.880196	0.251456	0.488228	1.94494	0.250917	0.22057	-1.02912	0.736723	-0.406434	0	-4917.62	31186.2	-4.40299	4.80104
94	1589	Nillson_TopS	1589	1590	NA	-1.13209	0.332247	0.122376	-0.74515	0.926659	0.444276	-0.0896415	-1.53455	-0.492139	1.04238	2.94342	0.026246	-0.672138	0	3787.32	-24047.4	11.5245	-18.2658
90	1590	Nillson_TopS	1590	1591	NA	0.899067	0.227387	-0.999884	-0.281271	0.897736	-0.60208	0.46165	0.362098	0.212889	-0.694046	-0.202677	-0.0623107	0.213674	0	-44613.5	-23698.7	0.04133	-8.05116
90	1591	Nillson_TopS	1591	1592	NA	1.35185	0.273596	-0.680453	0.0488065	0.752226	-0.493625	0.285372	0.157254	-0.168884	-0.903747	-0.366045	-0.277214	0.388743	0	NA	NA	0.04133	-8.05116
80	1592	Nillson_TopS	1592	1593	NA	-0.85603	-0.802119	0.327505	0.156984	-0.970564	0.724039	0.299993	0.0364273	0.50806	0.768425	-1.01381	0.747443	0.780799	0	4313.79	37642.2	-4.13488	11.909
97	1593	Nillson_TopS	1593	1594	NA	-0.817914	-0.612943	0.140843	-0.415682	-1.28381	1.41484	-1.21259	-0.0792728	-0.482817	2.11609	1.67791	0.911371	0.0405092	0	37296.6	-13897	-0.640634	29.6106
105	1594	Nillson_TopS	1594	1595	NA	1.13491	-0.268586	-0.963218	-0.117143	-0.00882438	1.4205	-0.215145	-1.3374	-0.35709	-0.670475	-0.934803	0.445528	2.8603	0	-708.83	-3270.02	-2.02318	19.8485
104	1595	Nillson_TopS	1595	1596	NA	-0.553063	-0.386105	0.553737	-0.72647	-1.41291	1.79136	-1.39149	-1.73539	-0.195749	1.92304	3.32926	0.745036	0.303314	0	48663.3	-17775.7	-1.20331	25.4698
90	1596	Nillson_TopS	1596	1597	NA	0.930435	0.284317	-0.517983	-0.155476	0.751249	-0.580893	0.311278	0.635795	-0.342315	-0.748145	0.201991	-0.54906	0.0853606	0	NA	NA	0.04133	-8.05116
87	1597	Nillson_TopS	1597	1598	NA	1.88366	-0.202067	-0.869939	0.261768	0.186874	0.0378243	-0.00680375	0.498282	-0.450685	-0.725815	-0.33887	-0.482922	0.694753	0	NA	NA	-2.80321	-1.98428
101	1598	Nillson_TopS	1598	1599	NA	1.10164	0.499038	-0.508922	-0.0456512	1.12428	-0.485057	0.223366	0.131078	-0.0866408	-0.826592	-0.0759248	-0.739488	0.0580833	0	NA	NA	1.66122	-10.7159
89	1599	Nillson_TopS	1599	1600	NA	-1.06724	0.421853	-0.419033	0.629148	1.01079	0.0635341	0.180286	-1.21939	-0.312099	0.763685	1.65061	-0.190708	-0.823709	0	-1814.77	-23412.8	11.2514	-19.9456
71	1600	Nillson_TopS	1600	1601	NA	-1.16915	-0.413438	2.75063	-0.239054	-0.0944668	-0.385472	-0.290105	0.230116	1.31013	-0.377602	-0.799524	0.581296	-0.0783814	0	13633.1	13860	-7.2091	4.52457
94	1601	Nillson_TopS	1601	1602	NA	-0.857724	1.06088	-0.139021	-0.680373	1.52925	0.119138	0.47934	-1.54522	0.273968	0.596456	0.921589	-0.087436	-0.929751	0	-367.995	-25762.8	11.5245	-18.2658
87	1602	Nillson_TopS	1602	1603	NA	1.88049	-0.62927	-0.530759	0.111004	-0.127306	0.102138	-0.14441	1.12034	-0.826409	-0.64903	-0.0856007	-0.678588	1.10584	0	NA	NA	-2.80321	-1.98428
96	1603	Nillson_TopS	1603	1604	NA	0.27578	0.56958	-0.605772	-0.462345	1.04364	-0.468863	0.349539	0.695788	0.11871	-0.502215	-0.0196923	-0.295131	-0.405042	0	-38194.2	-22095.6	5.64891	-15.0421
78	1604	Nillson_TopS	1604	1605	NA	1.19087	-0.0513989	-0.910649	-0.100512	0.488307	-0.336311	0.197829	0.312721	-0.0513773	-0.716115	0.204481	-0.255866	0.35777	0	NA	NA	-1.47521	-5.09834
78	1605	Nillson_TopS	1605	1606	NA	1.72572	0.116206	-0.731902	0.254856	0.663846	-0.18142	-0.0786946	0.192839	-0.382003	-0.896811	0.0293964	-0.82314	0.587989	0	NA	NA	-1.47521	-5.09834
90	1606	Nillson_TopS	1606	1607	NA	1.76737	-0.0514044	-0.442831	0.8011	0.34672	-0.17517	-0.17174	0.352353	-0.355306	-0.929257	-0.48811	-0.761696	0.606519	0	NA	NA	0.04133	-8.05116
97	1607	Nillson_TopS	1607	1608	NA	-0.913029	-0.902146	0.711209	-0.695972	-1.35132	1.25643	-1.0263	-0.591911	-0.65476	1.96675	3.49958	0.805039	-0.203786	0	36258.6	-15260.2	-0.640634	29.6106
74	1608	Nillson_TopS	1608	1609	NA	-1.01979	0.768812	0.00431824	-0.0721247	1.14045	0.33954	0.323524	-1.94066	-0.406685	1.01049	1.26663	0.0793494	-0.613107	0	-594.366	-25476	10.1585	-18.3044
102	1609	Nillson_TopS	1609	1610	NA	-0.838498	-0.104	1.15942	0.122494	-1.18844	1.02063	-0.997777	0.435954	-0.314664	1.66011	-0.904959	0.678716	0.324237	0	27480.1	14549	-5.64805	12.479
90	1610	Nillson_TopS	1610	1611	NA	0.9932	0.329741	-0.445018	0.118384	0.884075	-0.59064	0.472496	0.0235479	-0.046195	-0.842693	-0.315915	-0.393527	0.11201	0	NA	NA	0.04133	-8.05116
94	1611	Nillson_TopS	1611	1612	NA	-0.931218	0.594941	-0.448854	-1.0211	1.10569	0.464355	0.306918	-1.84087	-0.396821	1.07006	2.91393	0.0715539	-0.526713	0	3189.03	-25127.3	11.5245	-18.2658
78	1612	Nillson_TopS	1612	1613	NA	1.67709	-0.0699378	-0.644531	0.391244	0.481381	-0.128852	0.146762	0.287032	-0.100069	-1.01241	-0.732886	-0.39185	0.55629	0	NA	NA	-1.47521	-5.09834
87	1613	Nillson_TopS	1613	1614	NA	1.46886	-0.38812	-0.524781	0.198979	0.136115	-0.279075	-0.0422025	0.507429	-0.368234	-0.8831	0.357981	-0.349616	0.505217	0	NA	NA	-2.80321	-1.98428
90	1614	Nillson_TopS	1614	1615	NA	0.878641	0.079561	-0.437737	-0.409053	0.729295	-0.531797	0.287077	0.501109	-0.113345	-0.665672	0.211952	-0.31875	0.0420453	0	-44722.9	-25234.6	0.04133	-8.05116
96	1615	Nillson_TopS	1615	1616	NA	0.18377	0.731395	-0.738713	-0.531932	1.25495	-0.6986	0.559877	0.470968	0.119759	-0.471726	0.451803	-0.202187	-0.684031	0	-36387.6	-21934.8	5.64891	-15.0421
90	1616	Nillson_TopS	1616	1617	NA	1.30198	-0.204863	-0.623418	-0.20745	0.303943	-0.3146	0.247845	0.462527	-0.242091	-0.69535	0.248823	-0.304961	0.309087	0	NA	NA	0.04133	-8.05116
90	1617	Nillson_TopS	1617	1618	NA	1.33197	0.322014	-0.812463	-0.0761591	0.679721	-0.35127	0.176876	0.353965	-0.255552	-0.886285	0.24883	-0.70237	0.38685	0	NA	NA	0.04133	-8.05116
71	1618	Nillson_TopS	1618	1619	NA	-1.3845	-0.306219	3.6765	-0.264653	-0.314924	-0.744613	-0.0307157	-0.525382	1.59975	-0.814131	-0.838352	0.920512	0.470705	0	14523.5	11391.3	-7.2091	4.52457
90	1619	Nillson_TopS	1619	1620	NA	1.32877	0.215817	-0.875803	0.0352679	0.658054	-0.316684	0.179036	0.248222	-0.149699	-0.85933	0.224682	-0.686739	0.41843	0	NA	NA	0.04133	-8.05116
81	1620	Nillson_TopS	1620	1621	NA	0.416492	0.730232	-0.444746	-0.397223	1.31291	-0.661946	0.616145	-0.145799	0.326256	-0.740715	0.101552	-0.351932	-0.384858	0	NA	NA	3.47305	-13.3053
90	1621	Nillson_TopS	1621	1622	NA	1.07641	-0.307941	-0.308708	0.180667	0.0804767	-0.560564	0.1787	0.704447	-0.244272	-0.833802	0.212243	-0.197966	0.277053	0	NA	NA	0.04133	-8.05116
89	1622	Nillson_TopS	1622	1623	NA	-1.13916	0.565364	-0.0683646	0.743659	1.03775	0.436493	0.204038	-1.89161	-0.387007	0.910232	1.07186	0.0558152	-0.670914	0	-2036.79	-23761	11.2514	-19.9456
104	1623	Nillson_TopS	1623	1624	NA	-0.198957	-0.0384328	0.390386	-0.524834	-0.971774	2.2513	-1.24111	-1.82695	-0.685441	2.26212	1.504	0.747421	0.291099	0	51001.6	-14073.8	-1.20331	25.4698
93	1624	Nillson_TopS	1624	1625	NA	-1.17102	-0.411575	0.457881	0.798567	-1.01152	-0.0912625	0.580579	1.77918	0.291257	0.600689	-1.08952	0.566351	-0.320789	0	-4689.14	33203.4	-4.40299	4.80104
88	1625	Nillson_TopS	1625	1626	NA	-0.565645	-0.0216708	0.611607	-0.620155	-1.03485	1.67884	-0.964665	-1.53175	0.616251	1.66247	0.645367	0.509095	0.158516	0	55832.2	-11930.9	-1.47868	23.5644
94	1626	Nillson_TopS	1626	1627	NA	-0.95561	1.12838	-0.893377	-0.491537	1.51528	0.292343	0.553539	-1.67565	0.0260112	0.891287	1.46274	0.0519937	-0.902649	0	NA	NA	11.5245	-18.2658
81	1627	Nillson_TopS	1627	1628	NA	0.399764	0.204559	-0.655545	-0.136709	0.737741	-0.656898	0.467264	0.772731	0.316117	-0.682643	-0.143876	-0.0684785	-0.267252	0	NA	NA	3.47305	-13.3053
101	1628	Nillson_TopS	1628	1629	NA	0.857494	0.376322	-0.741325	0.15819	0.914931	-0.618905	0.17609	0.531202	-0.08577	-0.706033	-0.0170667	-0.483175	-0.023045	0	NA	NA	1.66122	-10.7159
97	1629	Nillson_TopS	1629	1630	NA	-0.626708	-0.570619	0.700255	-0.170554	-1.29358	1.17924	-1.19267	-0.918208	-0.783709	2.21811	2.24903	1.01543	-0.0365726	0	40047.7	-14855	-0.640634	29.6106
101	1630	Nillson_TopS	1630	1631	NA	1.06121	0.524444	-0.730544	-0.0524544	0.961959	-0.437655	0.466083	0.166283	-0.0522098	-0.770239	-0.36047	-0.420157	0.0238439	0	-46403.9	-23370.7	1.66122	-10.7159
71	1631	Nillson_TopS	1631	1632	NA	-1.28185	-0.110512	2.42112	-0.272404	-0.456121	-0.19249	-0.379251	0.709495	1.1845	0.173245	-1.10689	0.280662	-0.0482263	0	13473.9	16232.9	-7.2091	4.52457
76	1632	Nillson_TopS	1632	1633	NA	-1.38337	-0.850258	0.528119	0.923679	-1.12598	0.32323	0.115745	0.557931	0.268493	0.619214	0.246704	0.569963	-0.0315036	0	NA	NA	-3.9653	1.78471
81	1633	Nillson_TopS	1633	1634	NA	0.676693	0.496942	-0.0632303	-0.402246	0.954998	-0.759063	0.414235	0.0922986	-0.111549	-0.659102	0.231163	-0.377756	-0.207431	0	NA	NA	3.47305	-13.3053
81	1634	Nillson_TopS	1634	1635	NA	0.798428	0.935971	-0.620192	0.0340191	1.33167	-0.619392	0.540139	0.0136061	-0.0461995	-0.85659	-0.11958	-0.778792	-0.15416	0	NA	NA	3.47305	-13.3053
69	1635	Nillson_TopS	1635	1636	NA	-0.0966657	0.680112	0.187249	-0.763337	-0.723029	2.24434	-1.11652	-1.55369	1.12031	1.92136	-1.44664	0.6129	0.573601	0	59613	-3845.9	-2.63306	16.7582
81	1636	Nillson_TopS	1636	1637	NA	0.784219	0.715762	-0.828752	-0.401141	1.11319	-0.608551	0.418211	0.0888176	0.0129878	-0.566807	0.0504859	-0.368296	-0.0220846	0	-42591	-23243.8	3.47305	-13.3053
87	1637	Nillson_TopS	1637	1638	NA	1.36744	-0.318263	-0.642682	0.108142	0.241653	-0.416641	0.131977	0.971197	-0.481676	-0.723813	0.0887226	-0.384676	0.441954	0	NA	NA	-2.80321	-1.98428
101	1638	Nillson_TopS	1638	1639	NA	1.07127	0.480439	-0.853514	-0.173721	1.08243	-0.502414	0.300547	0.504941	-0.0192902	-0.805835	-0.208019	-0.594831	0.18427	0	NA	NA	1.66122	-10.7159
89	1639	Nillson_TopS	1639	1640	NA	-1.03905	0.574726	-0.252889	0.293136	1.23356	0.538342	0.224078	-2.21033	-0.402721	1.07509	1.7727	0.260845	-0.788047	0	-418.464	-24357	11.2514	-19.9456
90	1640	Nillson_TopS	1640	1641	NA	0.610888	-0.0131307	-0.736463	-0.363646	0.678921	-0.513555	0.567597	0.468917	0.211054	-0.470299	-0.144745	0.1517	-0.181508	0	NA	NA	0.04133	-8.05116
101	1641	Nillson_TopS	1641	1642	NA	0.865224	0.746745	-0.509641	0.523681	1.14374	-0.706317	0.372941	-0.225485	0.0123793	-0.886705	-0.449495	-0.494408	0.00130913	0	NA	NA	1.66122	-10.7159
94	1642	Nillson_TopS	1642	1643	NA	-1.06097	0.53086	-0.16196	-0.66419	0.866878	0.596482	0.133612	-2.11482	-0.262166	1.24815	2.45957	0.288615	-0.506084	0	NA	NA	11.5245	-18.2658
90	1643	Nillson_TopS	1643	1644	NA	1.53623	0.311675	-0.6722	0.116766	0.786208	-0.300039	0.282509	-0.0409784	-0.1738	-0.975168	-0.389168	-0.434358	0.353708	0	NA	NA	0.04133	-8.05116
94	1644	Nillson_TopS	1644	1645	NA	-1.05517	0.467466	-0.238896	-0.54755	0.917221	0.458811	0.102349	-1.11155	-0.492164	1.00641	1.99126	-0.0324993	-0.749879	0	NA	NA	11.5245	-18.2658
84	1645	Nillson_TopS	1645	1646	NA	-0.949694	-0.691192	0.647084	0.241057	-0.82092	0.524911	0.245825	-0.873935	0.696829	1.10886	-0.772823	0.927541	0.489206	0	7565.12	38546.9	-3.02112	14.8073
90	1646	Nillson_TopS	1646	1647	NA	1.06225	-0.0624801	-0.523504	-0.210124	0.357492	-0.539356	0.232739	0.524524	-0.000706635	-0.832574	0.242123	-0.1967	0.196908	0	NA	NA	0.04133	-8.05116
102	1647	Nillson_TopS	1647	1648	NA	-0.983954	-0.400642	1.55161	0.100988	-0.708386	0.879883	-0.718359	0.343859	0.0576542	1.39915	-1.03094	0.250202	0.051693	0	27859.6	15375.4	-5.64805	12.479
90	1648	Nillson_TopS	1648	1649	NA	1.0893	-0.0166682	-0.48688	-0.120309	0.203836	-0.444869	0.195254	0.401858	-0.156425	-0.802593	0.347111	-0.14404	0.147057	0	NA	NA	0.04133	-8.05116
74	1649	Nillson_TopS	1649	1650	NA	-0.858917	0.944242	-0.560392	-0.544203	1.25707	0.311231	0.461647	-1.16994	-0.123616	0.832666	0.809595	0.0495019	-0.799554	0	-2329.57	-26374.5	10.1585	-18.3044
69	1650	Nillson_TopS	1650	1651	NA	-0.315214	0.389379	0.357604	-0.858739	-0.798399	2.10811	-1.01502	-1.28832	1.04309	1.83898	-1.16675	0.669156	0.382743	0	58660.8	-4443.71	-2.63306	16.7582
71	1651	Nillson_TopS	1651	1652	NA	-1.23771	-0.0462095	2.33703	-0.28571	0.0579715	-0.557136	-0.0491106	1.14063	1.06817	-0.585457	-0.721714	0.269331	-0.408226	0	8897.03	14159.4	-7.2091	4.52457
101	1652	Nillson_TopS	1652	1653	NA	0.767429	0.261992	-0.556025	-0.172785	0.827861	-0.565166	0.305557	0.221139	0.00778436	-0.825383	0.202918	-0.326996	0.112737	0	-44857.7	-24856.3	1.66122	-10.7159
86	1653	Nillson_TopS	1653	1654	NA	-1.36221	-0.15183	0.626331	0.309059	-0.783439	-0.217689	0.856549	0.981681	1.00477	-0.127458	-1.23833	0.833685	0.203363	0	-3044.35	30056.5	-4.2936	8.20126
89	1654	Nillson_TopS	1654	1655	NA	-0.797305	0.482353	0.266558	0.795989	0.799449	0.153409	0.0384134	-1.24782	-0.537999	0.628739	0.949527	-0.238115	-0.821362	0	-2470.38	-22118.9	11.2514	-19.9456
81	1655	Nillson_TopS	1655	1656	NA	0.104724	0.812671	-0.486106	-0.466328	1.40795	-0.716754	0.697165	0.207458	0.278801	-0.583121	-0.155859	-0.305916	-0.393302	0	NA	NA	3.47305	-13.3053
81	1656	Nillson_TopS	1656	1657	NA	0.559282	0.601405	-0.424787	0.0644827	0.8579	-0.631263	0.389723	0.107953	0.00737298	-0.641165	-0.0821044	-0.27222	-0.300639	0	-42533	-22162.3	3.47305	-13.3053
87	1657	Nillson_TopS	1657	1658	NA	1.16108	-0.155338	-0.763823	0.184151	0.206617	-0.506072	0.421469	0.352925	0.0189527	-0.844128	-0.142291	-0.0355024	0.423572	0	-52115.5	-27069	-2.80321	-1.98428
81	1658	Nillson_TopS	1658	1659	NA	0.713121	0.55622	-0.720281	-0.275142	1.01648	-0.668078	0.460178	0.481778	-0.0376397	-0.683086	-0.0976032	-0.349834	-0.0382755	0	NA	NA	3.47305	-13.3053
81	1659	Nillson_TopS	1659	1660	NA	0.702078	0.5216	-0.868119	-0.362508	1.03905	-0.573498	0.356682	0.443063	0.0748994	-0.551323	0.22353	-0.407716	-0.210967	0	NA	NA	3.47305	-13.3053
81	1660	Nillson_TopS	1660	1661	NA	0.518026	0.961583	-0.627767	-0.269186	1.26667	-0.343584	0.361809	-0.557888	-0.048127	-0.455068	0.47734	-0.715234	-0.211884	0	NA	NA	3.47305	-13.3053
80	1661	Nillson_TopS	1661	1662	NA	-0.915518	-0.541645	0.767722	1.06147	-0.827437	0.188225	0.366776	-0.133579	0.147282	0.758101	-1.22263	0.666941	0.44513	0	NA	NA	-4.13488	11.909
97	1662	Nillson_TopS	1662	1663	NA	-0.79416	-0.84966	0.42396	-0.727775	-1.60254	1.50623	-1.20569	-0.243646	-0.550729	2.20542	2.95614	0.948787	-0.0998791	0	35660.2	-14777.3	-0.640634	29.6106
72	1663	Nillson_TopS	1663	1664	NA	-0.723926	0.395221	-0.427067	-0.156067	0.705252	0.365183	-0.196948	0.172065	-0.631249	0.879373	0.99613	-0.125469	-0.904322	0	-6557.61	-21077.9	8.83648	-17.3626
94	1664	Nillson_TopS	1664	1665	NA	-0.86788	0.2061	-0.128001	-0.330322	0.501905	0.431719	-0.161042	-0.525872	-0.67336	1.13834	1.33825	0.0398434	-0.549318	0	856.822	-22807.7	11.5245	-18.2658
71	1665	Nillson_TopS	1665	1666	NA	-1.04897	-0.290756	2.75634	-0.334357	-0.0903253	-0.517396	-0.0428333	0.0921867	1.23512	-0.267993	-0.906409	0.310585	0.0548759	0	13752.8	13510.5	-7.2091	4.52457
90	1666	Nillson_TopS	1666	1667	NA	1.48361	0.258667	-0.742653	-0.0495104	0.757139	-0.227206	0.0387888	0.613024	-0.357164	-0.903296	-0.0976132	-0.613974	0.281377	0	-49143.4	-26353.6	0.04133	-8.05116
90	1667	Nillson_TopS	1667	1668	NA	1.00874	0.0864044	-0.312122	-0.0510809	0.685715	-0.521231	0.138382	0.200514	0.0575039	-0.771008	-0.168385	-0.266328	0.132169	0	-48127	-24915.3	0.04133	-8.05116
81	1668	Nillson_TopS	1668	1669	NA	0.666287	0.388771	-0.73305	-0.42416	0.966648	-0.662451	0.517493	0.428042	0.143158	-0.656048	0.249708	-0.322026	-0.212759	0	NA	NA	3.47305	-13.3053
90	1669	Nillson_TopS	1669	1670	NA	1.09433	0.181006	-0.655687	-0.358603	0.708488	-0.557674	0.26756	0.687726	-0.0439852	-0.720467	-0.00981676	-0.324046	0.0598843	0	NA	NA	0.04133	-8.05116
74	1670	Nillson_TopS	1670	1671	NA	-0.284724	0.343347	-0.49627	-0.14765	0.60359	0.125038	-0.218426	0.358428	-0.506566	0.676874	0.773984	-0.363941	-0.622997	0	-7595.7	-20362.9	10.1585	-18.3044
90	1671	Nillson_TopS	1671	1672	NA	1.27808	0.195554	-0.592734	-0.126007	0.676649	-0.355102	0.377463	0.307964	0.0756578	-0.822614	-0.634779	-0.279116	0.22461	0	NA	NA	0.04133	-8.05116
90	1672	Nillson_TopS	1672	1673	NA	1.19329	0.238268	-0.79018	0.129435	0.695874	-0.440304	0.197494	0.27508	-0.104618	-0.794455	-0.38669	-0.192241	0.32813	0	NA	NA	0.04133	-8.05116
78	1673	Nillson_TopS	1673	1674	NA	1.40726	-0.0478797	-0.72628	-0.0759942	0.119233	-0.304605	0.28968	0.318154	-0.00974175	-0.769775	-0.0248312	-0.246084	0.37137	0	-52293.1	-27729.5	-1.47521	-5.09834
87	1674	Nillson_TopS	1674	1675	NA	1.64487	-0.284786	-0.319752	-0.0812188	0.065437	-0.238316	-0.0100924	0.497639	-0.294276	-0.893825	0.00459857	-0.373795	0.625844	0	NA	NA	-2.80321	-1.98428
101	1675	Nillson_TopS	1675	1676	NA	1.16426	0.471926	-0.601043	-0.222997	0.838854	-0.565581	0.330633	0.35013	0.0102733	-0.82383	-0.287645	-0.452528	0.14857	0	-46764.7	-24116.5	1.66122	-10.7159
79	1676	Nillson_TopS	1676	1677	NA	0.301063	0.330288	-0.21969	-0.576811	-0.92281	2.74252	-0.939698	-2.04026	-0.336436	2.84523	-1.09332	1.3971	0.851494	0	62427.4	-9952.07	-2.18619	19.1368
101	1677	Nillson_TopS	1677	1678	NA	1.08489	0.342487	-0.608759	-0.246247	0.895366	-0.416424	0.46716	-0.0617677	-0.308751	-0.581427	-0.0604103	-0.466493	0.270645	0	NA	NA	1.66122	-10.7159
71	1678	Nillson_TopS	1678	1679	NA	-1.07926	-0.354086	2.74907	-0.069603	-0.145457	-0.523934	-0.109932	-0.159851	1.38953	-0.464967	-0.773791	0.414161	0.111989	0	NA	NA	-7.2091	4.52457
94	1679	Nillson_TopS	1679	1680	NA	-0.835754	0.465409	0.0618771	-0.798735	0.927895	0.589316	0.0663299	-2.02939	-0.429354	1.16884	2.45397	0.0825126	-0.551377	0	NA	NA	11.5245	-18.2658
90	1680	Nillson_TopS	1680	1681	NA	1.1407	0.107209	-0.402087	-0.206516	0.70575	-0.460144	0.394438	0.591586	-0.00714611	-0.822796	-0.548121	-0.271234	0.107601	0	-47938.2	-24701.9	0.04133	-8.05116
90	1681	Nillson_TopS	1681	1682	NA	1.16013	0.223956	-0.646471	-0.127427	0.612332	-0.396441	0.166931	0.867578	-0.224453	-0.819416	-0.0997884	-0.584823	0.206588	0	NA	NA	0.04133	-8.05116
78	1682	Nillson_TopS	1682	1683	NA	1.42621	-0.291655	-0.515566	0.206821	0.212556	-0.419156	-0.0467642	0.513245	-0.265466	-0.772099	0.114888	-0.313604	0.444075	0	-52127.9	-29404.4	-1.47521	-5.09834
81	1683	Nillson_TopS	1683	1684	NA	0.421545	0.314621	-0.691015	-0.103924	0.881536	-0.751782	0.419447	0.692853	0.0927001	-0.70545	0.0963182	-0.179971	-0.17812	0	NA	NA	3.47305	-13.3053
90	1684	Nillson_TopS	1684	1685	NA	1.4884	0.0994536	-0.325003	-0.146506	0.547829	-0.36076	0.251584	0.270144	-0.358169	-0.573744	-0.358823	-0.448524	0.201927	0	NA	NA	0.04133	-8.05116
72	1685	Nillson_TopS	1685	1686	NA	-0.67405	0.0451744	-0.0914626	0.883612	0.186373	0.236558	-0.455111	-0.11154	-0.759032	0.715563	1.28589	-0.153724	-0.75087	0	-5098.17	-18716	8.83648	-17.3626
94	1686	Nillson_TopS	1686	1687	NA	-0.59103	0.756114	-0.591621	-0.477592	1.0849	0.354837	0.0833814	-0.96647	-0.55508	0.940378	1.32738	-0.0652226	-0.773726	0	-2962.96	-24908.4	11.5245	-18.2658
87	1687	Nillson_TopS	1687	1688	NA	1.89164	-0.464353	-0.538248	0.226707	-0.0493133	-0.173003	0.010925	0.718243	-0.237763	-0.789958	-0.386624	-0.482136	0.738655	0	NA	NA	-2.80321	-1.98428
74	1688	Nillson_TopS	1688	1689	NA	-0.886173	0.952535	-0.385537	-0.616471	1.34444	0.459368	0.437465	-1.3643	-0.223162	1.11082	0.771674	0.0770073	-0.903023	0	-1590.57	-26506.2	10.1585	-18.3044
69	1689	Nillson_TopS	1689	1690	NA	-0.28612	0.00139583	0.49625	-0.654408	-0.910691	2.02088	-0.735374	-1.36488	0.971901	2.01669	-1.36549	0.788845	0.472641	0	58859.2	-3828.73	-2.63306	16.7582
101	1690	Nillson_TopS	1690	1691	NA	0.295831	0.450456	-0.725146	0.161349	0.914935	-0.541383	0.429592	0.431887	0.0589511	-0.830609	0.0456151	-0.346969	-0.051597	0	NA	NA	1.66122	-10.7159
90	1691	Nillson_TopS	1691	1692	NA	0.871156	-0.181075	-0.500444	-0.589213	0.358054	-0.186602	0.183578	0.34483	-0.188449	-0.504436	0.612908	-0.157874	0.160893	0	NA	NA	0.04133	-8.05116
90	1692	Nillson_TopS	1692	1693	NA	0.949131	0.173979	-0.385394	-0.281734	0.722746	-0.396538	0.133866	0.806157	-0.352402	-0.586742	-0.137603	-0.499715	0.125558	0	NA	NA	0.04133	-8.05116
81	1693	Nillson_TopS	1693	1694	NA	0.857805	0.384818	-0.461577	0.0670685	0.831067	-0.613772	0.270633	0.55792	-0.176949	-0.701256	-0.403949	-0.437203	0.11927	0	NA	NA	3.47305	-13.3053
88	1694	Nillson_TopS	1694	1695	NA	-0.338406	0.312125	0.162916	-0.833515	-1.10576	1.95502	-1.21021	-1.35293	0.103286	1.56471	1.40489	0.279337	0.30093	0	55964.2	-15472.6	-1.47868	23.5644
90	1695	Nillson_TopS	1695	1696	NA	1.01462	0.172874	-0.961156	0.220457	0.682114	-0.441702	0.314233	0.324551	0.068541	-0.859319	-0.00817358	-0.363452	0.216042	0	NA	NA	0.04133	-8.05116
90	1696	Nillson_TopS	1696	1697	NA	1.15577	-0.033926	-0.617102	-0.190233	0.519513	-0.5197	0.317845	0.435599	-0.12498	-0.634638	0.199512	-0.192371	-0.0422097	0	NA	NA	0.04133	-8.05116
79	1697	Nillson_TopS	1697	1698	NA	0.162914	0.396585	0.242203	-0.635712	-0.763387	2.62274	-1.07034	-1.64906	-0.613463	2.47526	-1.20254	1.0602	0.801934	0	62311.2	-9744.23	-2.18619	19.1368
90	1698	Nillson_TopS	1698	1699	NA	1.45629	0.252493	-0.440733	0.133007	0.948156	-0.379884	0.234001	0.237439	-0.158684	-1.00195	-0.240791	-0.855967	0.281861	0	NA	NA	0.04133	-8.05116
101	1699	Nillson_TopS	1699	1700	NA	1.00354	0.274005	-0.795589	-0.166745	1.0635	-0.423175	0.440851	0.184913	0.109783	-0.67995	-0.311509	-0.419115	0.0886926	0	-45698.7	-23269.7	1.66122	-10.7159
87	1700	Nillson_TopS	1700	1701	NA	2.00197	-0.303353	-0.257976	0.743175	-0.0588749	-0.0615069	-0.308691	0.802925	-0.602031	-0.976055	-0.541253	-0.710676	0.878093	0	NA	NA	-2.80321	-1.98428
104	1701	Nillson_TopS	1701	1702	NA	-0.35147	0.225124	0.745909	-0.757304	-1.19187	2.05613	-1.33324	-2.21686	-0.236792	1.73889	2.49474	0.640468	0.461709	0	50180.7	-16577	-1.20331	25.4698
77	1702	Nillson_TopS	1702	1703	NA	0.188057	0.99499	-0.770021	-0.105513	1.41036	-0.497051	0.487954	0.454403	-0.137899	-0.324644	0.182712	-0.83134	-0.601965	0	-31610.6	-22141.5	7.51315	-16.4179
69	1703	Nillson_TopS	1703	1704	NA	-0.0639627	0.103174	0.675214	-0.740854	-1.08658	2.08347	-1.08122	-1.85127	0.931777	1.71854	-1.41756	0.810207	1.86746	0	52971.1	-1681.35	-2.63306	16.7582
90	1704	Nillson_TopS	1704	1705	NA	0.990943	0.329488	-0.284512	-0.471197	0.752643	-0.663004	0.315333	0.245587	0.137842	-0.746343	-0.0542774	-0.300846	0.0317089	0	NA	NA	0.04133	-8.05116
104	1705	Nillson_TopS	1705	1706	NA	-0.285625	-0.0485289	0.753251	-0.778662	-1.27659	2.09291	-1.27053	-1.86157	-0.370232	2.20675	1.37665	0.920353	0.382753	0	51678.2	-13443.1	-1.20331	25.4698
87	1706	Nillson_TopS	1706	1707	NA	1.90086	-0.371372	-0.481847	0.066695	-0.153201	-0.021163	-0.573538	0.79064	-0.81538	-0.508555	0.739614	-0.690056	0.698175	0	NA	NA	-2.80321	-1.98428
83	1707	Nillson_TopS	1707	1708	NA	-0.5587	-0.583417	0.412314	-0.52697	-1.17481	1.71694	-1.13773	-1.58256	-0.644943	2.54042	2.20142	1.07943	0.122458	0	43945.2	-14444.5	-0.90395	27.6653
87	1708	Nillson_TopS	1708	1709	NA	1.71012	-0.307783	-0.357222	0.0226903	0.0725669	-0.195469	-0.0976321	0.653427	-0.202443	-0.875805	-0.181358	-0.489961	0.630228	0	NA	NA	-2.80321	-1.98428
76	1709	Nillson_TopS	1709	1710	NA	-0.85001	-0.809754	0.688715	0.645876	-0.876519	-0.4238	0.513747	0.084377	0.550441	0.157559	0.454908	0.546857	-0.208053	0	NA	NA	-3.9653	1.78471
103	1710	Nillson_TopS	1710	1711	NA	-0.2416	0.056296	0.323597	-0.478141	-1.09394	2.19367	-1.37144	-1.55583	-0.364264	2.46779	-0.0692287	1.17749	0.618691	0	58175	-11567.6	-1.77317	21.6487
101	1711	Nillson_TopS	1711	1712	NA	0.88148	0.129801	-0.526208	-0.319143	0.644308	-0.667533	0.246338	0.196549	-0.00428496	-0.50487	0.231461	-0.299843	0.232524	0	-45446.9	-25257.5	1.66122	-10.7159
90	1712	Nillson_TopS	1712	1713	NA	1.23476	0.20218	-0.790262	-0.157817	0.700105	-0.437585	0.207131	0.643859	-0.0296007	-0.765632	-0.28686	-0.44324	0.297712	0	NA	NA	0.04133	-8.05116
83	1713	Nillson_TopS	1713	1714	NA	-0.712402	-0.750449	0.963443	-0.375536	-1.47659	1.44965	-0.902088	-1.50124	-0.747451	2.29128	2.86404	1.07532	-0.0939283	0	40655.6	-15289.7	-0.90395	27.6653
74	1714	Nillson_TopS	1714	1715	NA	-0.771392	0.397284	-0.370324	0.136048	1.01755	0.127933	0.100639	-0.248676	-0.354744	0.596283	0.958058	-0.406658	-0.839013	0	-6187.64	-22987.2	10.1585	-18.3044
90	1715	Nillson_TopS	1715	1716	NA	1.58131	0.178804	-0.533464	-0.167517	0.623567	-0.264585	-0.0545037	0.268879	-0.425597	-0.696218	0.144383	-0.722637	0.445564	0	NA	NA	0.04133	-8.05116
96	1716	Nillson_TopS	1716	1717	NA	0.143015	0.662949	-0.641765	-0.541	1.24581	-0.705614	0.507995	0.54889	0.12866	-0.399147	0.169925	-0.283873	-0.454953	0	-36779.1	-21626.1	5.64891	-15.0421
72	1717	Nillson_TopS	1717	1718	NA	-0.307375	-0.349708	0.0287219	1.11523	0.102728	0.181819	-0.534244	0.181278	-1.14709	0.630622	1.41656	-0.266259	-0.589342	0	-5359.96	-16970.9	8.83648	-17.3626
94	1718	Nillson_TopS	1718	1719	NA	-0.918671	1.50625	-0.47779	-0.47775	1.76879	0.0957303	0.739661	-2.28617	0.24868	0.558939	1.55682	-0.0921919	-1.01096	0	-612.15	-26213.8	11.5245	-18.2658
87	1719	Nillson_TopS	1719	1720	NA	1.62333	-0.152202	-0.923504	-0.0802487	0.348594	-0.238637	0.00733651	0.789182	0.000491945	-0.764802	-0.491582	-0.258273	0.615779	0	NA	NA	-2.80321	-1.98428
81	1720	Nillson_TopS	1720	1721	NA	0.575699	0.209306	-0.338059	-0.110213	0.691019	-0.835111	0.386248	0.65017	0.19396	-0.776843	-0.113882	-0.145931	-0.110211	0	NA	NA	3.47305	-13.3053
85	1721	Nillson_TopS	1721	1722	NA	1.01984	-0.0877991	2.31383	0.349397	-0.731972	0.343376	-0.895305	-1.29332	-0.411662	0.806517	-0.625872	-0.114771	0.567531	0	26612	18954.9	-6.1752	13.2135
101	1722	Nillson_TopS	1722	1723	NA	0.932275	0.502234	-0.397597	-0.124845	0.757131	-0.431534	0.209842	-0.0476441	-0.331902	-0.520433	0.229061	-0.651813	0.101865	0	-46150.5	-24890.8	1.66122	-10.7159
87	1723	Nillson_TopS	1723	1724	NA	2.19325	-0.493976	-0.399025	0.45409	0.0655628	0.0901131	-0.402599	0.468496	-0.946073	-0.939399	0.248612	-0.738778	1.08198	0	NA	NA	-2.80321	-1.98428
90	1724	Nillson_TopS	1724	1725	NA	1.50647	-0.204331	-0.0458978	1.0168	0.220965	-0.3169	-0.341423	0.662796	-0.756179	-0.848633	0.0561419	-0.89995	0.460131	0	NA	NA	0.04133	-8.05116
81	1725	Nillson_TopS	1725	1726	NA	0.361877	0.526182	-0.455876	-0.455161	0.971861	-0.553013	0.527146	0.0754124	0.21323	-0.516693	0.0968785	-0.249925	-0.293378	0	NA	NA	3.47305	-13.3053
87	1726	Nillson_TopS	1726	1727	NA	1.33635	-0.275998	-0.652692	0.042225	0.105497	-0.256399	0.34134	0.186369	0.0536207	-1.02675	0.0706269	-0.0708228	0.472224	0	NA	NA	-2.80321	-1.98428
93	1727	Nillson_TopS	1727	1728	NA	-1.38437	-0.310555	0.452974	-0.158886	-0.961063	-0.450302	1.05691	1.9607	1.09709	-0.0340957	-0.999356	0.962413	-0.121999	0	-3519.19	30154.1	-4.40299	4.80104
87	1728	Nillson_TopS	1728	1729	NA	1.85729	-0.0551109	-0.339454	0.606337	0.377472	-0.142677	-0.014669	-0.0715204	-0.285579	-0.955547	-0.752942	-0.559143	0.812732	0	NA	NA	-2.80321	-1.98428
101	1729	Nillson_TopS	1729	1730	NA	0.915772	0.356146	-0.788296	-0.0850739	0.71001	-0.640738	0.219055	0.541391	-0.0278078	-0.729432	0.240416	-0.41708	0.0470251	0	-44572	-24883.8	1.66122	-10.7159
71	1730	Nillson_TopS	1730	1731	NA	-1.22024	0.0725933	1.37702	0.198084	-0.353527	-0.251831	0.112245	0.411098	1.84588	-0.17243	-1.35088	0.672667	-0.482098	0	NA	NA	-7.2091	4.52457
90	1731	Nillson_TopS	1731	1732	NA	0.994793	0.26097	-0.663615	-0.215278	0.793981	-0.646843	0.10343	0.557988	-0.293546	-0.555275	0.400984	-0.599004	0.211055	0	NA	NA	0.04133	-8.05116
89	1732	Nillson_TopS	1732	1733	NA	-1.15725	0.406626	0.0193312	0.867344	0.81738	0.335635	-0.0569375	-1.29993	-0.613969	0.827775	1.46761	-0.0606621	-0.867259	0	-1652.45	-22433.8	11.2514	-19.9456
87	1733	Nillson_TopS	1733	1734	NA	1.96794	-0.475366	-0.790124	0.222199	-0.0141416	0.00189895	0.0887338	-0.0662176	-0.171462	-0.904734	0.0379458	-0.298871	0.885391	0	NA	NA	-2.80321	-1.98428
90	1734	Nillson_TopS	1734	1735	NA	0.790686	0.240903	-0.390312	0.0716	0.81426	-0.502516	0.284863	0.288329	0.00358046	-0.847332	0.154344	-0.525233	-0.128172	0	NA	NA	0.04133	-8.05116
78	1735	Nillson_TopS	1735	1736	NA	1.67503	-0.0330059	-0.775234	0.213377	0.492541	-0.15997	0.125551	0.0607767	-0.109505	-1.0385	-0.128962	-0.437491	0.542246	0	-53532.5	-27216.1	-1.47521	-5.09834
87	1736	Nillson_TopS	1736	1737	NA	1.67693	-0.454307	-0.338864	0.173982	0.0338292	-0.35985	-0.173378	0.695464	-0.399495	-0.850842	0.175538	-0.346419	0.557325	0	NA	NA	-2.80321	-1.98428
90	1737	Nillson_TopS	1737	1738	NA	1.09021	-0.0169068	-0.507618	0.329365	0.602101	-0.81174	0.266372	0.555078	-0.139059	-0.984368	0.0777666	-0.249769	0.150033	0	NA	NA	0.04133	-8.05116
81	1738	Nillson_TopS	1738	1739	NA	0.367337	0.354001	-0.489981	-0.382319	0.853321	-0.547768	0.164568	0.425174	-0.30978	-0.372957	0.808565	-0.207143	-0.402177	0	NA	NA	3.47305	-13.3053
95	1739	Nillson_TopS	1739	1740	NA	-1.17526	-0.373351	2.08499	-0.19615	-0.529559	0.0496651	-0.517707	0.828864	1.28237	0.471556	-0.597895	0.236117	-0.605868	0	13344.8	17606.3	-5.89098	4.66014
90	1740	Nillson_TopS	1740	1741	NA	1.32804	0.392357	-0.653587	-0.00274844	0.93716	-0.359698	0.181505	0.112017	-0.185225	-0.858017	-0.186787	-0.627506	0.309849	0	-48483.2	-24800.1	0.04133	-8.05116
87	1741	Nillson_TopS	1741	1742	NA	1.44796	-0.214231	-0.739324	-0.0584234	0.157731	-0.334384	0.0179421	0.430928	-0.271136	-0.596601	0.231828	-0.200583	0.433252	0	-51592.3	-28857.4	-2.80321	-1.98428
87	1742	Nillson_TopS	1742	1743	NA	2.21186	-0.805604	-0.43945	0.518276	-0.306317	0.00637428	-0.377376	1.11494	-0.742465	-0.786669	0.144965	-0.86068	1.12314	0	NA	NA	-2.80321	-1.98428
90	1743	Nillson_TopS	1743	1744	NA	1.10651	0.121648	-0.500883	-0.0319865	0.684555	-0.562667	0.333301	0.191775	-0.00474104	-0.651916	-0.533985	-0.206048	0.328678	0	NA	NA	0.04133	-8.05116
90	1744	Nillson_TopS	1744	1745	NA	0.97874	0.0747404	-0.549173	0.14316	0.614771	-0.571844	0.152693	0.479041	-0.110781	-0.778867	0.19712	-0.391823	0.0223039	0	NA	NA	0.04133	-8.05116
78	1745	Nillson_TopS	1745	1746	NA	1.5004	0.011509	-0.534967	0.0821534	0.57301	-0.329222	0.127479	0.109349	-0.278666	-0.865827	-0.196438	-0.263797	0.375239	0	-52542.1	-26335.1	-1.47521	-5.09834
101	1746	Nillson_TopS	1746	1747	NA	0.802734	0.381809	-0.266993	0.0155612	0.921691	-0.531459	0.251559	0.725023	-0.0106	-0.857417	-0.527474	-0.470023	-0.125885	0	NA	NA	1.66122	-10.7159
89	1747	Nillson_TopS	1747	1748	NA	-0.965847	0.303575	0.020176	0.903138	0.642778	0.471257	-0.184425	-1.65671	-0.630881	1.05352	1.73322	-0.126281	-0.755618	0	-978.576	-22386.4	11.2514	-19.9456
89	1748	Nillson_TopS	1748	1749	NA	-0.731283	0.0656129	0.212642	0.902779	0.521927	0.503316	-0.277161	-1.38317	-0.610458	1.06666	0.785686	0.0790037	-0.599186	0	-1618.16	-22021.1	11.2514	-19.9456
90	1749	Nillson_TopS	1749	1750	NA	1.06716	0.349419	-0.928922	-0.150732	0.864215	-0.437643	0.277805	0.578492	0.0751104	-0.894622	0.00394174	-0.636268	0.274069	0	NA	NA	0.04133	-8.05116
84	1750	Nillson_TopS	1750	1751	NA	-1.01476	-0.306613	0.733745	0.193679	-0.81829	0.479904	0.459662	-1.26082	0.736546	0.923404	-0.639153	0.893052	0.362398	0	9264.78	38090.7	-3.02112	14.8073
79	1751	Nillson_TopS	1751	1752	NA	0.023311	0.249084	0.0762294	-0.687123	-0.916963	2.57781	-0.940073	-1.76219	-0.515583	2.67928	-1.0507	1.27703	0.909851	0	62404.2	-10109.6	-2.18619	19.1368
94	1752	Nillson_TopS	1752	1753	NA	-0.809183	-0.0464782	-0.0323381	0.538009	0.584638	0.385071	-0.22326	-1.06757	-0.616999	1.01022	1.22163	0.0578427	-0.541962	0	NA	NA	11.5245	-18.2658
81	1753	Nillson_TopS	1753	1754	NA	0.181536	0.282976	0.583495	-0.415086	0.706575	-0.672136	0.165211	0.292702	0.230597	-0.59796	0.250848	-0.313311	-0.47434	0	NA	NA	3.47305	-13.3053
90	1754	Nillson_TopS	1754	1755	NA	1.46933	0.322515	-0.621162	-0.134272	0.755907	-0.300737	-0.0990659	0.6936	-0.394623	-0.767816	0.0405169	-0.839284	0.308479	0	-48807.9	-26603.8	0.04133	-8.05116
96	1755	Nillson_TopS	1755	1756	NA	-0.00109625	0.985898	-0.534672	-0.469708	1.59291	-0.606804	0.725503	0.456283	0.166286	-0.517365	-0.559169	-0.316275	-0.445593	0	NA	NA	5.64891	-15.0421
90	1756	Nillson_TopS	1756	1757	NA	1.25547	0.351351	-0.722855	-0.198616	0.764059	-0.386736	0.287384	0.186598	0.0480208	-0.911083	-0.204713	-0.422542	0.306704	0	NA	NA	0.04133	-8.05116
90	1757	Nillson_TopS	1757	1758	NA	1.15803	0.405801	-0.58055	-0.242629	0.740571	-0.408027	0.281001	0.267585	-0.14724	-0.830483	-0.129721	-0.413944	0.214021	0	NA	NA	0.04133	-8.05116
78	1758	Nillson_TopS	1758	1759	NA	1.87865	0.142014	-0.894374	0.4133	0.668998	-0.0816226	-0.0583438	0.343892	-0.700326	-0.884881	-0.000375597	-0.880823	0.651581	0	NA	NA	-1.47521	-5.09834
81	1759	Nillson_TopS	1759	1760	NA	0.777275	0.451121	-0.63966	-0.124422	0.993297	-0.683864	0.436122	0.45809	0.103658	-0.793187	-0.197966	-0.195542	-0.246109	0	NA	NA	3.47305	-13.3053
90	1760	Nillson_TopS	1760	1761	NA	1.16234	0.169247	-0.812088	0.129228	0.831751	-0.542006	0.277415	0.359933	-0.222532	-0.929975	-0.00602511	-0.190082	0.172155	0	-48213.4	-25304.3	0.04133	-8.05116
90	1761	Nillson_TopS	1761	1762	NA	1.3203	0.173286	-0.679473	0.283851	0.649672	-0.288261	0.293506	0.469857	-0.182325	-0.864853	-0.744205	-0.456	0.424071	0	NA	NA	0.04133	-8.05116
76	1762	Nillson_TopS	1762	1763	NA	-1.30367	-0.793034	0.582187	0.508378	-0.787635	-0.0849533	0.336504	1.36515	0.173948	0.445341	-0.160013	0.622345	-0.227787	0	NA	NA	-3.9653	1.78471
87	1763	Nillson_TopS	1763	1764	NA	1.63808	-0.65949	-0.347331	-0.0331472	-0.381319	-0.179308	-0.289178	0.526408	-0.35174	-0.449158	0.758238	-0.333991	0.500925	0	-47697.1	-27007.6	-2.80321	-1.98428
78	1764	Nillson_TopS	1764	1765	NA	1.59294	0.153031	-0.782247	0.350902	0.495286	-0.292624	0.299547	0.0296992	-0.156076	-1.05613	-0.426843	-0.297185	0.523469	0	-53070.1	-26067.5	-1.47521	-5.09834
87	1765	Nillson_TopS	1765	1766	NA	1.26335	0.139841	-0.783645	0.499267	0.316605	-0.434279	0.171945	0.383063	-0.151178	-0.932592	-0.0444126	-0.447503	0.379914	0	NA	NA	-2.80321	-1.98428
90	1766	Nillson_TopS	1766	1767	NA	1.09048	0.363382	-0.525737	0.021197	0.669393	-0.49636	0.239634	0.448992	-0.215137	-0.862515	0.0221846	-0.540241	0.0878719	0	NA	NA	0.04133	-8.05116
102	1767	Nillson_TopS	1767	1768	NA	-0.574951	-0.593898	1.65595	-0.314557	-0.817108	1.17385	-0.979225	-0.164758	0.215757	1.65703	-1.00408	0.523004	0.177101	0	28410.8	15403.5	-5.64805	12.479
101	1768	Nillson_TopS	1768	1769	NA	1.02281	0.430419	-0.568704	-0.182798	0.897073	-0.471705	0.146205	0.394827	-0.153387	-0.802238	0.0714248	-0.57685	0.10696	0	-45841.8	-24733.4	1.66122	-10.7159
87	1769	Nillson_TopS	1769	1770	NA	1.87365	-4.96e-06	-0.231391	0.149049	0.493037	-0.20415	-0.165239	0.448863	-0.499563	-0.900758	-0.274408	-0.74333	0.49993	0	-52213.4	-28470	-2.80321	-1.98428
90	1770	Nillson_TopS	1770	1771	NA	1.4361	-0.0234592	-0.913453	-0.0102317	0.490393	-0.265554	0.276659	0.527558	-0.19276	-1.00873	-0.147999	-0.223837	0.485364	0	NA	NA	0.04133	-8.05116
101	1771	Nillson_TopS	1771	1772	NA	1.02957	0.321471	-0.583571	-0.285491	0.774255	-0.39684	0.410218	0.344449	-0.00101288	-0.695111	-0.0966641	-0.436829	-0.104569	0	-45915.7	-24318.5	1.66122	-10.7159
78	1772	Nillson_TopS	1772	1773	NA	1.42596	-0.159284	-0.418617	0.0846759	0.396644	-0.290421	-0.0028357	0.184548	-0.0460223	-0.779551	-0.25014	-0.381636	0.501793	0	-53382.7	-27507.5	-1.47521	-5.09834
101	1773	Nillson_TopS	1773	1774	NA	0.970685	0.295831	-0.478329	-0.21626	0.755354	-0.631481	0.345483	0.0887692	-0.0206256	-0.729097	0.181028	-0.342167	0.055	0	NA	NA	1.66122	-10.7159
71	1774	Nillson_TopS	1774	1775	NA	-0.958272	-0.360808	2.43133	-0.221416	-0.248684	-0.396832	-0.238575	0.222012	1.25272	-0.439875	-0.748744	0.352455	0.161355	0	13707	13578	-7.2091	4.52457
87	1775	Nillson_TopS	1775	1776	NA	1.75175	-0.295866	-0.53445	0.363203	0.193991	-0.0617797	-0.192763	0.66587	-0.564277	-0.976639	0.129099	-0.669217	0.666466	0	-51808.4	-30043.7	-2.80321	-1.98428
83	1776	Nillson_TopS	1776	1777	NA	-0.637835	-0.800844	0.859543	-0.330419	-1.34355	1.41496	-1.31014	-1.65298	-0.806245	2.34757	3.35891	1.06247	0.25251	0	40578.2	-15648.4	-0.90395	27.6653
87	1777	Nillson_TopS	1777	1778	NA	2.11476	-0.52337	-0.439915	0.811805	-0.0942737	0.0205274	-0.447624	0.398602	-0.595561	-1.06836	0.127636	-0.690752	1.0428	0	NA	NA	-2.80321	-1.98428
90	1778	Nillson_TopS	1778	1779	NA	1.20887	0.0697631	-0.513118	-0.188563	0.702371	-0.430629	0.148999	0.633262	-0.407053	-0.745987	0.170173	-0.57774	0.267165	0	NA	NA	0.04133	-8.05116
90	1779	Nillson_TopS	1779	1780	NA	1.23426	0.105111	-0.85799	-0.147866	0.551182	-0.340119	0.281762	0.241316	0.120818	-0.780946	-0.156325	-0.192074	0.271097	0	NA	NA	0.04133	-8.05116
87	1780	Nillson_TopS	1780	1781	NA	1.62971	-0.328682	-0.667797	-0.0170664	-0.013213	-0.240714	0.152116	0.18075	0.147034	-0.866755	-0.136219	-0.0175328	0.530959	0	-52861	-27979.5	-2.80321	-1.98428
78	1781	Nillson_TopS	1781	1782	NA	0.937127	-0.0968132	-0.152361	-0.252061	0.135964	-0.481845	0.281394	0.170764	-0.0769967	-0.717171	0.109006	-0.00856209	0.320252	0	-50797.9	-27204.7	-1.47521	-5.09834
90	1782	Nillson_TopS	1782	1783	NA	1.21976	-0.0333582	0.125503	-0.107601	0.467266	-0.403581	0.0221272	0.293825	-0.103243	-1.02011	-0.0967628	-0.373747	0.263805	0	NA	NA	0.04133	-8.05116
94	1783	Nillson_TopS	1783	1784	NA	-0.97333	0.391218	0.133477	-0.424496	0.980096	0.579772	0.16503	-2.15009	-0.119936	1.20858	2.04974	0.275648	-0.755577	0	3157.1	-24687.3	11.5245	-18.2658
94	1784	Nillson_TopS	1784	1785	NA	-0.955894	0.87255	0.0029155	-0.824244	1.26979	0.354562	0.29156	-1.87326	-0.234509	0.829104	2.31995	-0.0550886	-0.893079	0	NA	NA	11.5245	-18.2658
74	1785	Nillson_TopS	1785	1786	NA	-0.735829	0.762868	-0.541836	-0.322875	1.21465	0.542882	0.17476	-1.13584	-0.517711	1.00128	0.797654	0.144071	-0.839331	0	-1683.86	-26072.3	10.1585	-18.3044
78	1786	Nillson_TopS	1786	1787	NA	1.23635	-0.348612	-0.215011	0.722747	-0.00624988	-0.361077	0.0594129	0.240912	-0.289097	-0.790506	-0.0749413	-0.224778	0.3056	0	-52536.6	-28743.7	-1.47521	-5.09834
101	1787	Nillson_TopS	1787	1788	NA	1.00509	0.409801	-0.488619	-0.249169	0.814851	-0.472186	0.317737	0.165433	-0.0302044	-0.806013	-0.169347	-0.413383	0.190298	0	NA	NA	1.66122	-10.7159
100	1788	Nillson_TopS	1788	1789	NA	-0.607283	-0.759742	0.635808	-0.176995	-0.819079	0.529706	-1.08156	0.772438	-0.151246	1.05952	1.7527	0.0102924	-0.513625	0	25096.8	-13425.3	-0.457409	31.025
94	1789	Nillson_TopS	1789	1790	NA	-0.984044	0.576975	-0.323369	-0.665495	1.11454	0.500963	0.218657	-1.84752	-0.203542	1.22207	1.84414	0.194333	-0.623374	0	1657.91	-25572.3	11.5245	-18.2658
90	1790	Nillson_TopS	1790	1791	NA	1.70924	-0.0709089	-0.475727	0.512441	0.279294	-0.213361	-0.094669	0.638808	-0.596882	-0.925609	0.0381068	-0.830831	0.511703	0	NA	NA	0.04133	-8.05116
74	1791	Nillson_TopS	1791	1792	NA	-0.774996	0.65412	-0.537849	-0.637754	1.29772	0.2967	0.196987	-1.05591	-0.296793	0.832147	1.52825	-0.14004	-0.679203	0	-1682.42	-25360.7	10.1585	-18.3044
87	1792	Nillson_TopS	1792	1793	NA	1.67344	-0.250162	-0.838901	0.230604	0.15517	-0.214965	-0.127167	0.726853	-0.437209	-0.716484	0.150838	-0.564893	0.668041	0	-51860.4	-29829	-2.80321	-1.98428
84	1793	Nillson_TopS	1793	1794	NA	-0.836777	-0.735121	0.334018	0.406836	-1.00551	0.431151	0.438303	0.0336072	0.299613	0.810685	-1.17952	0.929728	0.849647	0	3980.32	37469.5	-3.02112	14.8073
100	1794	Nillson_TopS	1794	1795	NA	-0.893069	-0.0824457	0.158102	-0.65107	-1.23135	1.11494	-1.53575	0.37701	-0.33196	1.88766	1.9089	0.686996	-0.0607761	0	32749	-14027.3	-0.457409	31.025
94	1795	Nillson_TopS	1795	1796	NA	-1.02565	0.629793	0.00095114	-0.71298	1.20345	0.44371	0.285191	-2.23119	-0.0354266	0.828503	2.72119	0.0221767	-0.662716	0	3848.09	-25464.3	11.5245	-18.2658
94	1796	Nillson_TopS	1796	1797	NA	-0.765254	0.881219	-0.75163	-0.481092	1.37149	0.0811717	0.41958	-1.31066	-0.105243	0.703977	1.53177	-0.0844359	-0.74368	0	-1809.03	-26322.2	11.5245	-18.2658
78	1797	Nillson_TopS	1797	1798	NA	1.48146	0.0805264	-0.680816	0.207577	0.644725	-0.463754	0.325595	0.157243	-0.0108285	-1.06621	-0.524569	-0.202847	0.468136	0	-52147.9	-25424.6	-1.47521	-5.09834
90	1798	Nillson_TopS	1798	1799	NA	1.80852	0.0995374	-0.858562	0.0816627	0.729763	-0.160111	0.221695	0.674968	-0.696643	-0.809914	-0.456943	-0.539074	0.523348	0	NA	NA	0.04133	-8.05116
94	1799	Nillson_TopS	1799	1800	NA	-0.982165	0.74035	0.00854761	-0.899359	1.12748	0.484744	0.277622	-2.0138	-0.260274	1.07511	2.57373	-0.00797949	-0.800475	0	3356.86	-25345.7	11.5245	-18.2658
87	1800	Nillson_TopS	1800	1801	NA	1.72648	-0.20454	-0.715319	0.0593221	0.0941699	-0.168015	-0.0812517	0.183895	-0.284411	-0.892063	0.334603	-0.404127	0.748457	0	NA	NA	-2.80321	-1.98428
81	1801	Nillson_TopS	1801	1802	NA	0.493233	0.775605	-0.751244	-0.412154	1.16808	-0.682589	0.643438	0.217542	0.122205	-0.906693	0.120912	-0.168495	-0.203153	0	NA	NA	3.47305	-13.3053
101	1802	Nillson_TopS	1802	1803	NA	0.891264	0.584979	-0.751832	-0.243024	0.96755	-0.60074	0.385091	0.446748	0.0065005	-0.723403	-0.267573	-0.291931	-0.0458942	0	-44239.7	-23112.5	1.66122	-10.7159
101	1803	Nillson_TopS	1803	1804	NA	0.866394	0.706122	-0.816318	-0.259918	1.20064	-0.556567	0.476466	0.581111	-0.0791903	-0.827052	-0.0430786	-0.547723	-0.229921	0	NA	NA	1.66122	-10.7159
86	1804	Nillson_TopS	1804	1805	NA	-1.30509	-0.423899	0.528408	0.924427	-0.703529	0.0564682	0.182412	1.45096	0.277275	0.758988	-1.02934	0.687859	-0.532589	0	-4257.8	33742.8	-4.2936	8.20126
87	1805	Nillson_TopS	1805	1806	NA	1.6991	-0.0189823	-0.597862	-0.0735816	0.249806	-0.162877	-0.0637028	0.499077	-0.244756	-0.786842	0.11241	-0.591447	0.337253	0	NA	NA	-2.80321	-1.98428
87	1806	Nillson_TopS	1806	1807	NA	1.41483	-0.568777	-0.187444	-0.333699	-0.213837	-0.477418	0.228389	0.687421	0.184793	-0.826556	-0.0343782	-0.11127	0.592921	0	NA	NA	-2.80321	-1.98428
87	1807	Nillson_TopS	1807	1808	NA	1.93944	-0.289115	-0.243383	0.286267	0.29277	-0.0376104	0.0171672	0.0745833	-0.258681	-1.10099	-0.594501	-0.484225	0.872313	0	NA	NA	-2.80321	-1.98428
101	1808	Nillson_TopS	1808	1809	NA	0.878269	0.0440422	-0.337653	0.0296305	0.659363	-0.528033	0.350202	0.132012	-0.153291	-0.702132	0.17422	-0.381919	0.0457443	0	NA	NA	1.66122	-10.7159
90	1809	Nillson_TopS	1809	1810	NA	0.924181	0.265375	-0.464716	-0.346307	0.959008	-0.502152	0.190747	0.645992	-0.10142	-0.753458	0.0773815	-0.536315	-0.0489917	0	NA	NA	0.04133	-8.05116
87	1810	Nillson_TopS	1810	1811	NA	1.69478	-0.338096	-0.365803	0.420603	0.167565	-0.255118	-0.0977723	0.260394	-0.160887	-0.972597	0.000158425	-0.490161	0.499757	0	NA	NA	-2.80321	-1.98428
101	1811	Nillson_TopS	1811	1812	NA	1.17342	0.618123	-0.580215	-0.0620518	0.999519	-0.450767	0.544531	-0.067673	0.0414889	-0.909395	-0.821281	-0.269879	0.19925	0	-47217.1	-22799.8	1.66122	-10.7159
90	1812	Nillson_TopS	1812	1813	NA	1.37468	0.237743	-0.637734	0.0722981	0.800555	-0.437365	0.355992	0.384911	0.0465172	-0.94564	-0.966373	-0.209521	0.383045	0	NA	NA	0.04133	-8.05116
96	1813	Nillson_TopS	1813	1814	NA	0.350774	0.350203	-0.85522	-0.433817	0.905538	-0.551513	0.44765	0.585432	0.159818	-0.492391	0.249692	-0.077279	-0.302762	0	-38876.9	-22740.6	5.64891	-15.0421
90	1814	Nillson_TopS	1814	1815	NA	0.819033	-0.171945	-0.527852	-0.293267	0.35742	-0.471424	0.0197308	1.09966	-0.22234	-0.368858	0.584747	-0.460056	-0.0782897	0	NA	NA	0.04133	-8.05116
87	1815	Nillson_TopS	1815	1816	NA	1.08732	-0.331173	-0.428838	0.0110726	0.326403	-0.373044	0.331193	-0.0392593	-0.025383	-0.725899	0.189844	0.0299577	0.152457	0	-51872.3	-26583.2	-2.80321	-1.98428
102	1816	Nillson_TopS	1816	1817	NA	-0.791678	-0.601801	1.31544	0.102865	-0.778948	0.90419	-0.590872	-0.342416	0.358853	1.45909	-0.929716	0.678584	-0.0511586	0	NA	NA	-5.64805	12.479
87	1817	Nillson_TopS	1817	1818	NA	1.50656	-0.41272	-0.585343	0.253773	0.260988	-0.447594	0.202208	0.298485	-0.207434	-0.73555	0.0470742	-0.182011	0.323896	0	NA	NA	-2.80321	-1.98428
94	1818	Nillson_TopS	1818	1819	NA	-1.00041	0.800627	0.105738	-0.778745	1.25983	0.197012	0.406065	-2.30153	0.14406	0.672879	2.68352	0.0107975	-0.625055	0	3520.04	-25479.9	11.5245	-18.2658
71	1819	Nillson_TopS	1819	1820	NA	-1.34322	-0.113712	3.29407	-0.284724	-0.353102	-0.590274	-0.258944	-0.0833671	1.49276	-0.573509	-0.489904	0.313167	0.0793053	0	NA	NA	-7.2091	4.52457
89	1820	Nillson_TopS	1820	1821	NA	-1.22138	0.561523	-0.0695088	0.482418	0.946812	0.235394	0.0933343	-1.52588	-0.427566	0.847757	1.9368	-0.0599636	-0.951985	0	-1042.91	-23228.5	11.2514	-19.9456
90	1821	Nillson_TopS	1821	1822	NA	1.19653	0.399099	-0.919975	0.113944	0.864565	-0.387017	0.0724452	0.334523	-0.176652	-0.796677	-0.0287126	-0.481513	0.201129	0	NA	NA	0.04133	-8.05116
81	1822	Nillson_TopS	1822	1823	NA	0.426716	0.460563	-0.498442	-0.417227	1.05318	-0.521326	0.374691	0.845211	-0.0203207	-0.705004	0.222625	-0.436459	-0.455303	0	NA	NA	3.47305	-13.3053
90	1823	Nillson_TopS	1823	1824	NA	1.60801	0.253327	-0.80672	0.222223	0.829422	-0.254333	0.1035	0.348939	-0.397755	-0.81357	-0.553959	-0.689235	0.668632	0	NA	NA	0.04133	-8.05116
71	1824	Nillson_TopS	1824	1825	NA	-1.05821	-0.392909	2.48472	-0.359364	-0.109077	-0.435646	-0.195045	0.669786	1.45015	-0.142488	-1.30325	0.410025	0.0358815	0	13325.1	15384	-7.2091	4.52457
90	1825	Nillson_TopS	1825	1826	NA	1.21721	0.0806207	-0.518633	-0.210636	0.76422	-0.541111	0.152972	0.285718	-0.159945	-0.697177	0.0616425	-0.439498	0.301368	0	NA	NA	0.04133	-8.05116
94	1826	Nillson_TopS	1826	1827	NA	-0.911379	0.799073	-0.744691	-0.520741	1.27628	0.387837	0.397013	-1.81167	-0.165373	1.18953	1.46532	0.26515	-0.598863	0	NA	NA	11.5245	-18.2658
71	1827	Nillson_TopS	1827	1828	NA	-1.25096	-0.317912	3.27772	-0.270694	-0.41078	-0.680037	-0.347872	0.0650072	1.49366	-0.511005	-0.861283	0.707803	0.324754	0	13967.5	12944.1	-7.2091	4.52457
81	1828	Nillson_TopS	1828	1829	NA	0.538498	0.491506	-0.784032	-0.311565	0.952151	-0.599135	0.470864	0.54742	0.0763493	-0.477087	-0.0801345	-0.27844	-0.222002	0	NA	NA	3.47305	-13.3053
101	1829	Nillson_TopS	1829	1830	NA	0.987769	0.159083	-0.768977	-0.113171	0.776775	-0.506003	0.311847	-0.0453923	0.129529	-0.709097	0.273717	-0.246929	0.0423848	0	-45976.9	-24989.2	1.66122	-10.7159
88	1830	Nillson_TopS	1830	1831	NA	-0.578704	0.0344573	0.254203	-0.668922	-1.29405	1.78396	-1.08975	-1.39685	0.446985	1.43931	1.74803	0.469422	0.123582	0	54940.7	-16238.6	-1.47868	23.5644
90	1831	Nillson_TopS	1831	1832	NA	1.2232	0.158553	-0.598085	-0.0725174	0.489642	-0.354079	0.139024	0.404924	-0.208702	-0.873616	0.148988	-0.49477	0.336972	0	NA	NA	0.04133	-8.05116
96	1832	Nillson_TopS	1832	1833	NA	-0.449016	0.838586	-0.616596	-0.592576	1.36398	-0.729159	0.747806	0.376323	0.207858	-0.268508	0.270008	-0.217155	-0.465819	0	NA	NA	5.64891	-15.0421
87	1833	Nillson_TopS	1833	1834	NA	1.62232	-0.306856	-0.448358	0.204066	0.100877	-0.274737	-0.0262037	0.142404	-0.285798	-0.937405	0.321318	-0.416511	0.659211	0	NA	NA	-2.80321	-1.98428
90	1834	Nillson_TopS	1834	1835	NA	1.32824	0.138991	-0.721011	-0.177465	0.60615	-0.389598	0.150296	0.716797	-0.329305	-0.819429	0.0823344	-0.529242	0.316707	0	NA	NA	0.04133	-8.05116
87	1835	Nillson_TopS	1835	1836	NA	1.65478	-0.257155	-0.527046	0.178999	0.114568	-0.418725	0.190609	0.384235	-0.105739	-0.987619	-0.183021	-0.234701	0.57059	0	NA	NA	-2.80321	-1.98428
71	1836	Nillson_TopS	1836	1837	NA	-1.03718	0.306832	1.24376	0.918814	-0.240416	-0.0656882	0.0855847	1.16284	0.105004	-0.234178	-0.882938	0.213916	-0.796563	0	NA	NA	-7.2091	4.52457
69	1837	Nillson_TopS	1837	1838	NA	-0.00928316	0.487751	0.183251	-0.77032	-0.702197	2.49918	-0.844674	-1.95498	0.757323	2.03606	-1.27004	0.862143	0.573781	0	59907.3	-4651.24	-2.63306	16.7582
105	1838	Nillson_TopS	1838	1839	NA	-0.0192772	-0.954942	2.03616	-0.704986	-0.737138	1.30433	-0.557875	-0.843976	0.755874	-0.523601	-1.45083	0.502936	2.60633	0	17223.6	10686.9	-2.02318	19.8485
90	1839	Nillson_TopS	1839	1840	NA	0.771887	-0.0691485	-0.454686	-0.324655	0.512092	-0.51068	0.257141	0.80236	-0.0203984	-0.836664	0.208278	-0.150613	0.062071	0	NA	NA	0.04133	-8.05116
88	1840	Nillson_TopS	1840	1841	NA	-0.611026	0.248903	0.618139	-0.98922	-1.25824	1.75876	-1.27509	-0.807619	0.312975	1.34107	1.36303	0.258708	0.162073	0	55650.4	-15786.7	-1.47868	23.5644
89	1841	Nillson_TopS	1841	1842	NA	-1.08772	0.782445	-0.199315	0.366831	1.27257	0.11449	0.369112	-1.60862	-0.128462	0.744915	1.16448	-0.0705237	-0.937851	0	-2543.84	-25173.7	11.2514	-19.9456
90	1842	Nillson_TopS	1842	1843	NA	1.32955	0.257051	-0.311495	0.0639378	0.5933	-0.489461	0.120818	0.590221	-0.207141	-0.641315	-0.564168	-0.707621	0.304771	0	NA	NA	0.04133	-8.05116
87	1843	Nillson_TopS	1843	1844	NA	1.60929	-0.51335	-0.204045	0.146247	-0.041687	-0.316216	-0.202623	0.3698	-0.304153	-0.777522	0.457847	-0.418932	0.522643	0	NA	NA	-2.80321	-1.98428
81	1844	Nillson_TopS	1844	1845	NA	0.58177	0.449049	-0.35678	-0.454346	1.01888	-0.640496	0.442409	-0.080891	0.165523	-0.555577	0.246051	-0.221777	-0.332753	0	NA	NA	3.47305	-13.3053
83	1845	Nillson_TopS	1845	1846	NA	-0.618851	-0.565251	0.0743085	-0.627724	-1.3078	1.69725	-1.06625	-1.89546	-0.579937	2.4723	3.33269	1.18908	0.386119	0	42497.2	-15659	-0.90395	27.6653
90	1846	Nillson_TopS	1846	1847	NA	1.20452	-0.0272938	-0.274859	-0.0351542	0.422618	-0.445937	-0.0558516	0.614474	-0.549746	-0.637919	0.519601	-0.692659	0.250415	0	NA	NA	0.04133	-8.05116
87	1847	Nillson_TopS	1847	1848	NA	1.42092	-0.497632	-0.58151	-0.0323358	-0.0859108	-0.37804	0.124808	0.514163	-0.0559855	-0.719167	0.469124	-0.144215	0.285449	0	-51337.3	-29232.8	-2.80321	-1.98428
78	1848	Nillson_TopS	1848	1849	NA	1.4955	-0.214516	-0.491326	0.408618	0.254344	-0.254497	0.271505	0.0616845	0.0241961	-0.947453	-0.675064	0.0138697	0.402582	0	-52725.8	-25808.5	-1.47521	-5.09834
83	1849	Nillson_TopS	1849	1850	NA	-0.781165	-0.293795	0.276171	-0.13835	-1.09132	1.18929	-0.634163	-1.60813	-0.704915	2.03697	2.83225	0.687609	0.146717	0	40121.5	-15583.5	-0.90395	27.6653
71	1850	Nillson_TopS	1850	1851	NA	-1.31954	-0.379491	2.31905	-0.318607	-0.53179	-0.28523	-0.337816	1.01836	1.35958	0.164411	-0.561858	0.0526629	-0.280569	0	NA	NA	-7.2091	4.52457
90	1851	Nillson_TopS	1851	1852	NA	1.0525	0.149614	-0.483745	0.00821525	0.870521	-0.460451	0.070797	0.596552	-0.233539	-0.809319	0.164848	-0.600633	-0.0246712	0	NA	NA	0.04133	-8.05116
87	1852	Nillson_TopS	1852	1853	NA	1.85308	-0.251496	-0.651127	0.214859	0.265904	-0.0410777	-0.0880371	0.344162	-0.431134	-1.00286	0.157641	-0.586852	0.678119	0	NA	NA	-2.80321	-1.98428
104	1853	Nillson_TopS	1853	1854	NA	-0.651777	-0.480816	0.741633	-0.717823	-1.4361	1.66121	-1.43384	-0.754024	-0.471521	1.621	2.9347	0.579957	0.209712	0	47365.4	-17516.5	-1.20331	25.4698
101	1854	Nillson_TopS	1854	1855	NA	1.42662	0.171683	-0.697935	0.216904	0.907304	-0.411627	0.407773	-0.316269	0.0899739	-0.95433	-0.424228	-0.14787	0.150721	0	-49740.4	-24196	1.66122	-10.7159
94	1855	Nillson_TopS	1855	1856	NA	-0.984086	0.881853	0.0355407	-0.756365	1.31567	0.428644	0.356957	-2.28316	-0.0975362	0.980934	2.11604	0.0925416	-0.673443	0	2683.71	-25820.7	11.5245	-18.2658
79	1856	Nillson_TopS	1856	1857	NA	0.0215161	0.182068	-0.251939	-0.705295	-0.971026	2.6376	-1.15465	-1.09314	-0.605825	2.56388	-1.02284	1.13286	0.890276	0	61105.5	-9717.63	-2.18619	19.1368
104	1857	Nillson_TopS	1857	1858	NA	-0.173006	-0.0180823	0.78608	-0.677081	-1.34575	2.14491	-1.17931	-1.98503	-0.599798	1.97812	1.67727	0.910355	0.428214	0	50622.3	-14158.8	-1.20331	25.4698
81	1858	Nillson_TopS	1858	1859	NA	0.243335	0.635486	-0.300201	-0.189025	1.15151	-0.620988	0.390083	0.0493778	0.0405993	-0.607841	0.499029	-0.541175	-0.45945	0	NA	NA	3.47305	-13.3053
94	1859	Nillson_TopS	1859	1860	NA	-1.20311	0.204274	0.242235	0.186337	0.854492	0.519482	0.0742899	-1.52602	-0.516345	1.01562	2.02898	0.0293299	-1.0122	0	573.407	-22876.9	11.5245	-18.2658
82	1860	Nillson_TopS	1860	1861	NA	0.346479	-0.303759	-1.00219	-0.824087	-0.373746	0.0398362	1.33779	-0.92959	1.00132	0.0121961	-0.899116	1.53837	0.78779	0	4860.08	13334.7	-2.09482	14.9584
74	1861	Nillson_TopS	1861	1862	NA	-1.05124	0.728926	-0.409845	0.0289245	1.23986	0.361645	0.300147	-1.71301	-0.233099	0.961519	1.35584	0.0522638	-0.79909	0	-1231.92	-25885	10.1585	-18.3044
90	1862	Nillson_TopS	1862	1863	NA	1.10252	0.418309	-0.882919	0.0494857	0.897455	-0.360417	0.315676	0.484034	-0.111347	-0.806605	-0.568465	-0.332837	0.201953	0	-48317.6	-24338	0.04133	-8.05116
87	1863	Nillson_TopS	1863	1864	NA	1.32983	-0.21508	-0.523398	-0.0435482	0.0803608	-0.425829	0.0884788	0.242373	-0.262481	-0.658518	0.38181	-0.159603	0.412542	0	NA	NA	-2.80321	-1.98428
94	1864	Nillson_TopS	1864	1865	NA	-1.05537	0.376137	0.421861	-0.735185	0.730129	0.83998	-0.0859178	-2.44162	-0.679792	1.47805	3.30454	0.525449	-0.54409	0	NA	NA	11.5245	-18.2658
90	1865	Nillson_TopS	1865	1866	NA	1.08732	0.0725275	-0.268797	-0.0842706	0.503684	-0.480885	0.046746	0.349726	-0.241107	-0.756785	0.134417	-0.355905	0.201692	0	NA	NA	0.04133	-8.05116
94	1866	Nillson_TopS	1866	1867	NA	-1.21022	0.800014	-0.0289045	-0.87795	1.0533	0.43163	0.117477	-1.55009	0.555742	0.93464	1.57627	0.0887108	-0.970411	0	1623.57	-25620.2	11.5245	-18.2658
101	1867	Nillson_TopS	1867	1868	NA	0.917752	0.561692	-0.472418	0.182988	1.11293	-0.684988	0.345504	0.403885	0.0579359	-0.806234	-0.570427	-0.534243	-0.122521	0	NA	NA	1.66122	-10.7159
71	1868	Nillson_TopS	1868	1869	NA	-1.23929	-0.370458	3.18819	-0.291484	-0.292244	-0.55719	-0.190494	0.274047	1.37179	-0.493322	-0.657062	0.272024	0.0681904	0	13378	13415.9	-7.2091	4.52457
97	1869	Nillson_TopS	1869	1870	NA	-0.792203	-0.668875	0.214648	-0.671978	-1.38177	1.42667	-1.11957	-0.5981	-0.704519	2.09884	3.17836	0.888129	0.0149877	0	38073.7	-15487.6	-0.640634	29.6106
81	1870	Nillson_TopS	1870	1871	NA	0.0867016	0.843769	-0.628385	-0.136682	1.26473	-0.601047	0.547162	0.172412	0.136349	-0.490242	0.136005	-0.455994	-0.52349	0	NA	NA	3.47305	-13.3053
101	1871	Nillson_TopS	1871	1872	NA	0.738208	0.166952	-0.42797	-0.392199	0.838958	-0.563386	0.323563	0.385942	0.142377	-0.684912	-0.477888	0.0796749	0.137726	0	-44869.9	-23338.9	1.66122	-10.7159
78	1872	Nillson_TopS	1872	1873	NA	1.1693	0.225649	-0.422888	0.20061	0.598627	-0.496752	0.126173	-0.0853943	-0.435114	-0.699759	0.317423	-0.4993	0.270165	0	-50733.6	-27051.2	-1.47521	-5.09834
90	1873	Nillson_TopS	1873	1874	NA	1.18206	0.287661	-0.533855	-0.132292	0.793494	-0.338053	0.253146	0.752274	-0.238457	-0.841527	-0.416779	-0.58143	0.19775	0	NA	NA	0.04133	-8.05116
100	1874	Nillson_TopS	1874	1875	NA	-1.0173	-0.507189	1.00752	-0.870128	-1.5851	1.08584	-1.10703	0.505116	-0.51067	1.89619	2.66717	0.645075	-0.467629	0	31992.4	-14060.2	-0.457409	31.025
94	1875	Nillson_TopS	1875	1876	NA	-1.00572	0.436998	0.0903374	-0.743004	0.995125	0.338597	0.138124	-2.00728	-0.0980116	0.946596	2.48873	0.169657	-0.578484	0	4131.56	-24669.3	11.5245	-18.2658
100	1876	Nillson_TopS	1876	1877	NA	-1.17468	-0.825752	0.270267	-0.658857	-1.60324	1.03207	-1.04889	1.68116	-0.591452	1.78946	2.437	0.63235	-0.0730366	0	27810.8	-12965.9	-0.457409	31.025
87	1877	Nillson_TopS	1877	1878	NA	1.45435	-0.313993	-0.853877	0.475423	0.193147	-0.207515	0.17403	0.157664	-0.140849	-0.902189	0.123204	-0.200611	0.407416	0	NA	NA	-2.80321	-1.98428
80	1878	Nillson_TopS	1878	1879	NA	-1.3016	-0.529383	0.722573	1.29344	-0.804905	0.363867	0.167204	0.0563633	0.349287	0.808288	-1.03754	0.729136	0.0165318	0	NA	NA	-4.13488	11.909
90	1879	Nillson_TopS	1879	1880	NA	1.18828	-0.0332917	-0.67421	0.265353	0.52787	-0.469277	-0.0269084	0.344253	-0.35382	-0.658078	0.438747	-0.577403	0.341077	0	NA	NA	0.04133	-8.05116
90	1880	Nillson_TopS	1880	1881	NA	1.2506	0.243965	-0.662842	0.172068	0.579758	-0.452661	0.226134	0.527648	-0.0145404	-0.894566	-0.461272	-0.520911	0.376608	0	NA	NA	0.04133	-8.05116
89	1881	Nillson_TopS	1881	1882	NA	-1.27798	0.366695	0.584633	1.99006	0.874336	0.199154	0.0581757	-1.66562	-0.383127	0.799279	0.71241	-0.164392	-1.06201	0	-2092.45	-20584.5	11.2514	-19.9456
102	1882	Nillson_TopS	1882	1883	NA	-1.1706	-0.417131	1.52985	0.830831	-0.946801	0.566812	-0.635029	0.106802	0.295713	1.20182	-0.869254	0.360885	-0.00570176	0	28092	18302	-5.64805	12.479
81	1883	Nillson_TopS	1883	1884	NA	-0.0801564	0.225275	-0.183087	-0.548767	0.830803	-0.650439	0.62501	0.858672	0.285556	-0.416103	-0.164714	0.098851	-0.585349	0	NA	NA	3.47305	-13.3053
88	1884	Nillson_TopS	1884	1885	NA	-0.391584	0.221737	0.374999	-1.01243	-1.04131	1.97223	-1.2659	-1.8939	0.235507	1.40942	2.19855	0.403077	0.394443	0	54022.8	-16481.6	-1.47868	23.5644
70	1885	Nillson_TopS	1885	1886	NA	-1.21903	0.329469	1.23342	-0.303462	0.436317	-0.716188	0.0395061	3.10847	0.959524	-0.266839	-1.29631	-0.153675	-0.824371	0	-12437.6	2763.25	-1.98822	5.2871
71	1886	Nillson_TopS	1886	1887	NA	-0.749819	-0.085272	1.71614	-0.104067	-0.298296	-0.417783	-0.653327	0.931583	1.06752	0.0565966	-0.615637	0.175928	-0.363479	0	12312.7	16672.1	-7.2091	4.52457
81	1887	Nillson_TopS	1887	1888	NA	0.902384	0.411471	-0.406733	-0.234544	0.863513	-0.55469	0.21685	0.0281908	-0.00331259	-0.717776	0.160334	-0.433605	0.0242025	0	NA	NA	3.47305	-13.3053
87	1888	Nillson_TopS	1888	1889	NA	1.91078	-0.301745	-0.596332	0.216303	0.173352	-0.0219437	-0.0549242	0.591072	-0.291563	-0.970061	-0.497115	-0.483238	0.813531	0	NA	NA	-2.80321	-1.98428
90	1889	Nillson_TopS	1889	1890	NA	1.02308	0.19372	-0.717701	-0.0556784	0.641741	-0.431935	0.21536	0.318835	-0.151612	-0.771893	0.155219	-0.281372	0.136445	0	NA	NA	0.04133	-8.05116
69	1890	Nillson_TopS	1890	1891	NA	-0.297331	-0.00474306	0.156164	-0.595506	-0.759089	2.11802	-1.05456	-1.24015	0.399678	2.12861	-0.980518	0.867745	0.468596	0	59785.7	-5111.5	-2.63306	16.7582
81	1891	Nillson_TopS	1891	1892	NA	1.13654	0.623193	-0.776752	-0.156964	1.1314	-0.556031	0.519725	0.649791	-0.0749143	-0.681695	-0.729896	-0.535246	-0.0172734	0	NA	NA	3.47305	-13.3053
90	1892	Nillson_TopS	1892	1893	NA	1.13229	-0.118629	-0.203355	-0.0535489	0.217312	-0.223886	-0.259352	0.479113	-0.365934	-0.520022	0.515952	-0.555631	0.167561	0	NA	NA	0.04133	-8.05116
71	1893	Nillson_TopS	1893	1894	NA	-1.02977	-0.317361	2.186	-0.122032	-0.332815	-0.359381	-0.0931034	0.673252	1.1806	-0.135176	-0.860101	0.0736117	-0.0890521	0	NA	NA	-7.2091	4.52457
90	1894	Nillson_TopS	1894	1895	NA	1.05108	0.0713592	-0.208939	-0.286014	0.490907	-0.48285	0.231712	0.889627	-0.344645	-0.610331	-0.25593	-0.460213	0.190867	0	-48628.9	-26233	0.04133	-8.05116
88	1895	Nillson_TopS	1895	1896	NA	-0.693468	-0.0907822	-0.376568	-0.841909	-1.04552	1.64564	-0.631577	-0.897258	0.405667	1.43866	1.36248	0.477472	0.151105	0	55466.5	-15581.9	-1.47868	23.5644
94	1896	Nillson_TopS	1896	1897	NA	-0.975155	0.695861	-0.596257	-0.849913	1.09702	0.506799	0.214552	-1.72677	-0.277166	1.1798	2.23237	0.0888311	-0.486805	0	NA	NA	11.5245	-18.2658
90	1897	Nillson_TopS	1897	1898	NA	0.301476	0.0465352	-0.22129	0.584865	0.645556	-0.63115	0.322468	0.714067	-0.121857	-0.736776	0.146066	-0.375718	-0.428969	0	NA	NA	0.04133	-8.05116
78	1898	Nillson_TopS	1898	1899	NA	1.79076	-0.10566	-0.541246	0.138153	0.484455	-0.0117019	0.126309	-0.183717	-0.126582	-1.01231	-0.443066	-0.393929	0.6882	0	NA	NA	-1.47521	-5.09834
88	1899	Nillson_TopS	1899	1900	NA	-0.462623	0.153094	0.00589349	-0.866598	-0.927805	1.91692	-1.09675	-2.00068	0.720273	1.58379	2.03529	0.464965	0.150904	0	54733.4	-15674.8	-1.47868	23.5644
87	1900	Nillson_TopS	1900	1901	NA	1.94132	-0.405579	-0.711025	0.184426	0.227072	0.0180088	-0.0434819	0.287079	-0.392521	-1.01915	0.140155	-0.544332	0.833147	0	-52756.6	-29881.2	-2.80321	-1.98428
82	1901	Nillson_TopS	1901	1902	NA	0.0359853	0.207116	0.542912	0.0471159	0.00424884	-0.671153	0.45869	-0.832017	1.44342	-0.811068	-0.862966	0.841376	0.00544843	0	6740.58	14078.8	-2.09482	14.9584
90	1902	Nillson_TopS	1902	1903	NA	1.2143	0.37041	-0.478693	0.1305	0.819158	-0.519033	0.350828	0.508993	-0.142872	-0.962272	-0.642002	-0.562675	0.303662	0	NA	NA	0.04133	-8.05116
88	1903	Nillson_TopS	1903	1904	NA	-0.632723	0.0470435	1.17189	-1.03707	-1.28201	1.79505	-1.34334	-1.34322	0.527728	1.06004	2.05404	0.341675	0.0975801	0	53708.3	-16762.3	-1.47868	23.5644
91	1904	Nillson_TopS	1904	1905	NA	-1.07174	-0.54169	-0.0682084	0.801483	-0.738622	-0.221327	0.239127	-0.4444	0.582577	0.220432	0.88403	0.991353	-0.268368	0	-3533.75	19306	-3.17219	1.32407
90	1905	Nillson_TopS	1905	1906	NA	1.3119	0.534232	-1.00567	0.246353	0.966452	-0.407655	0.322758	0.0633951	-0.264973	-1.01638	-0.179523	-0.414611	0.337892	0	NA	NA	0.04133	-8.05116
90	1906	Nillson_TopS	1906	1907	NA	1.08814	-0.0645984	-0.540615	0.0328151	0.393805	-0.437059	0.295151	0.458531	-0.0651795	-0.977835	0.0866081	-0.172657	0.165408	0	NA	NA	0.04133	-8.05116
90	1907	Nillson_TopS	1907	1908	NA	1.36332	0.196165	-0.765315	-0.100065	0.817535	-0.231585	0.42529	0.319179	0.0222872	-0.854739	-0.649904	-0.436367	0.319128	0	-49528.8	-24368.9	0.04133	-8.05116
90	1908	Nillson_TopS	1908	1909	NA	1.76651	-0.0976967	-0.646606	0.568258	0.280062	-0.321565	-0.0391436	0.955509	-0.325115	-0.895294	-0.414799	-0.841531	0.575268	0	-52443.3	-28961.3	0.04133	-8.05116
78	1909	Nillson_TopS	1909	1910	NA	1.10859	-0.0334376	-0.420664	0.0194576	0.41938	-0.53311	0.167956	0.352	-0.0406767	-1.00789	0.0296617	-0.147326	0.344238	0	-51287.5	-27112.5	-1.47521	-5.09834
102	1910	Nillson_TopS	1910	1911	NA	-1.00455	-0.229999	1.4908	0.180188	-0.865795	0.770865	-0.653131	-0.699654	0.70323	1.27877	-0.812496	0.510115	0.102228	0	27484	15341.4	-5.64805	12.479
69	1911	Nillson_TopS	1911	1912	NA	-0.310107	0.279063	0.0984371	-0.647989	-0.797036	2.08448	-0.762961	-1.78906	0.673003	2.01093	-0.601674	0.72276	0.359178	0	58962.6	-5867.08	-2.63306	16.7582
87	1912	Nillson_TopS	1912	1913	NA	2.00441	-0.115625	-0.51669	0.373922	0.235661	-0.0857105	0.0557432	0.195478	-0.428609	-1.01031	-0.635397	-0.46086	0.903095	0	NA	NA	-2.80321	-1.98428
87	1913	Nillson_TopS	1913	1914	NA	1.67978	0.0779058	-0.550666	0.201889	0.435157	-0.274724	-0.165582	0.240185	-0.550395	-0.936175	0.254579	-0.686634	0.715678	0	NA	NA	-2.80321	-1.98428
90	1914	Nillson_TopS	1914	1915	NA	1.13429	0.184995	-0.84822	0.286239	0.661975	-0.630166	0.0768177	0.484003	-0.0907566	-0.940548	0.254796	-0.323829	0.135934	0	NA	NA	0.04133	-8.05116
69	1915	Nillson_TopS	1915	1916	NA	-0.331219	0.174354	0.678023	-0.353064	-0.96382	1.92495	-0.760644	-1.80113	0.475143	2.11956	-0.984016	0.836729	0.62559	0	59606	-4935.98	-2.63306	16.7582
94	1916	Nillson_TopS	1916	1917	NA	-1.08746	0.330419	-0.0734934	0.150188	0.693459	0.667159	-0.0783504	-1.84832	-0.472932	1.28842	1.75731	0.250247	-0.642512	0	NA	NA	11.5245	-18.2658
101	1917	Nillson_TopS	1917	1918	NA	1.00941	0.466669	-0.646797	-0.361776	0.943813	-0.500128	0.514439	0.407912	0.07619	-0.729334	-0.665844	-0.299705	0.184124	0	-46130.8	-23073.4	1.66122	-10.7159
87	1918	Nillson_TopS	1918	1919	NA	1.16837	-0.159971	-0.650436	0.103218	0.279403	-0.429025	0.242724	0.857721	-0.283365	-0.810226	-0.111881	-0.119228	0.226476	0	NA	NA	-2.80321	-1.98428
90	1919	Nillson_TopS	1919	1920	NA	1.09184	0.056232	-0.486742	-0.064629	0.677393	-0.434838	0.136311	0.240665	-0.274604	-0.647984	0.30752	-0.533651	0.187904	0	NA	NA	0.04133	-8.05116
90	1920	Nillson_TopS	1920	1921	NA	1.12055	0.271287	-0.453885	0.145621	0.820366	-0.655871	0.389948	0.00687879	-0.148384	-0.728734	0.0160088	-0.596036	0.124218	0	NA	NA	0.04133	-8.05116
74	1921	Nillson_TopS	1921	1922	NA	-0.930878	0.480443	-0.315978	-0.0154556	0.805218	0.200513	0.121001	-0.247855	-0.529275	0.682485	1.41481	-0.131805	-1.06563	0	-5393.09	-22406.7	10.1585	-18.3044
101	1922	Nillson_TopS	1922	1923	NA	1.08608	0.647454	-0.718031	0.11608	1.20272	-0.602073	0.423567	-0.281917	0.0606934	-0.872111	-0.331563	-0.502902	0.205928	0	NA	NA	1.66122	-10.7159
90	1923	Nillson_TopS	1923	1924	NA	1.64347	0.0631354	-0.375449	0.307026	0.29368	-0.308659	-0.127231	0.73519	-0.632728	-0.939325	0.199662	-1.03527	0.713466	0	NA	NA	0.04133	-8.05116
71	1924	Nillson_TopS	1924	1925	NA	-1.2466	-0.462354	3.11886	-0.186298	-0.580223	-0.654468	-0.0762855	-0.0786812	1.55894	-0.60232	-0.634138	0.660291	0.475475	0	14169.3	12316	-7.2091	4.52457
84	1925	Nillson_TopS	1925	1926	NA	-0.993779	-0.470598	1.38842	-0.186321	-0.90243	0.659162	0.570118	-1.50872	0.690166	1.20124	-0.507702	1.06497	0.0778867	0	9822.87	37956.6	-3.02112	14.8073
68	1926	Nillson_TopS	1926	1927	NA	-0.709798	0.285682	1.18229	0.648086	-0.618704	0.324614	-0.634962	0.499871	0.115136	0.396254	-0.478711	0.107843	-0.533149	0	28452.7	23486.6	-7.16747	12.5824
90	1927	Nillson_TopS	1927	1928	NA	1.20708	0.264047	-0.351567	0.0658687	0.724144	-0.443291	0.149555	0.546234	-0.165077	-0.864521	-0.405447	-0.620564	0.199125	0	NA	NA	0.04133	-8.05116
87	1928	Nillson_TopS	1928	1929	NA	1.61928	-0.276622	-0.223905	0.267194	0.169649	-0.18782	0.110037	0.674958	-0.231494	-1.0148	-0.711103	-0.401152	0.617103	0	-52728.5	-27488.1	-2.80321	-1.98428
87	1929	Nillson_TopS	1929	1930	NA	1.84004	-0.490325	-0.626887	0.47582	0.0738585	-0.00822831	-0.286842	0.528822	-0.407222	-0.835668	0.143233	-0.657077	0.742154	0	-51787.2	-30322.3	-2.80321	-1.98428
87	1930	Nillson_TopS	1930	1931	NA	1.66799	-0.139107	-0.895952	0.0137786	0.173363	-0.094012	-0.0487516	0.55732	-0.313397	-0.930981	0.464027	-0.513357	0.521131	0	NA	NA	-2.80321	-1.98428
102	1931	Nillson_TopS	1931	1932	NA	-0.912356	-0.7252	1.97203	-0.225019	-0.853782	0.917884	-0.703655	-0.950853	0.999658	1.46389	-0.700817	0.695034	0.0681237	0	28848.8	14189.9	-5.64805	12.479
78	1932	Nillson_TopS	1932	1933	NA	1.24736	-0.204504	-0.257806	-0.090551	0.363534	-0.381853	0.235016	0.135297	-0.00966668	-0.907116	-0.268228	-0.0524761	0.436555	0	NA	NA	-1.47521	-5.09834
81	1933	Nillson_TopS	1933	1934	NA	0.567483	0.434197	-0.673045	0.0142635	1.00962	-0.594702	0.466473	0.435096	0.0199286	-0.583814	0.166906	-0.597264	-0.337092	0	NA	NA	3.47305	-13.3053
100	1934	Nillson_TopS	1934	1935	NA	-0.938326	-0.632434	0.660026	-0.60349	-1.48295	1.27554	-1.24442	0.443141	-1.01368	2.02814	3.02186	0.758771	-0.243	0	32285.4	-14612.2	-0.457409	31.025
78	1935	Nillson_TopS	1935	1936	NA	1.40057	-0.081249	-0.641968	-0.133961	0.535213	-0.298097	0.181127	0.287941	-0.226892	-0.63398	-0.22822	-0.407372	0.552647	0	NA	NA	-1.47521	-5.09834
69	1936	Nillson_TopS	1936	1937	NA	0.117442	0.632173	-0.0968714	-0.714179	-0.886154	2.36467	-0.89269	-1.81831	0.671575	2.23744	-1.40268	0.964319	0.724939	0	60094.7	-5110.38	-2.63306	16.7582
90	1937	Nillson_TopS	1937	1938	NA	0.394575	-0.00107908	-0.153685	0.114726	0.514169	-0.600476	0.32513	0.502588	-0.205425	-0.659236	0.0332909	-0.0247979	-0.0909511	0	NA	NA	0.04133	-8.05116
90	1938	Nillson_TopS	1938	1939	NA	0.838074	0.250861	-0.43507	-0.106824	0.831226	-0.676956	0.245564	0.512822	-0.050633	-0.792353	-0.00809507	-0.378443	0.0409583	0	NA	NA	0.04133	-8.05116
89	1939	Nillson_TopS	1939	1940	NA	-1.06361	0.334061	-0.056896	0.612286	0.763122	0.698364	0.101335	-2.02223	-0.447468	1.23678	1.44159	0.129206	-0.67186	0	-877.725	-23447	11.2514	-19.9456
90	1940	Nillson_TopS	1940	1941	NA	1.03227	0.289204	-0.309977	-0.184903	0.690064	-0.442114	0.122338	0.281363	-0.0291678	-0.834226	0.0780464	-0.574843	0.12544	0	NA	NA	0.04133	-8.05116
101	1941	Nillson_TopS	1941	1942	NA	0.85649	0.498489	-0.66911	-0.0805776	0.966855	-0.665696	0.277636	0.0328849	0.00886601	-0.686917	0.365146	-0.452192	-0.134514	0	NA	NA	1.66122	-10.7159
81	1942	Nillson_TopS	1942	1943	NA	0.724565	0.607895	-0.918552	-0.295792	1.25143	-0.695639	0.744746	0.493027	0.216798	-0.739507	-0.565492	-0.242625	-0.0477723	0	NA	NA	3.47305	-13.3053
90	1943	Nillson_TopS	1943	1944	NA	1.62716	-0.0954449	-0.481732	0.311658	0.260543	-0.130739	-0.0310486	0.493814	-0.417281	-0.874981	-0.266608	-0.463168	0.409557	0	NA	NA	0.04133	-8.05116
90	1944	Nillson_TopS	1944	1945	NA	1.41864	0.333753	-0.449348	0.267005	0.721503	-0.558094	0.117104	0.159354	-0.149994	-1.04259	-0.160139	-0.624621	0.363862	0	-50283.4	-25765.9	0.04133	-8.05116
90	1945	Nillson_TopS	1945	1946	NA	1.20527	-0.130824	-0.30504	-0.107211	0.390522	-0.451712	0.092918	0.107455	-0.0723167	-0.720662	0.361796	-0.453349	0.316706	0	NA	NA	0.04133	-8.05116
90	1946	Nillson_TopS	1946	1947	NA	0.552232	0.482526	0.0271689	0.202939	0.927674	-0.659341	0.359494	0.804505	-0.258275	-0.777696	-0.297959	-0.780374	-0.221134	0	NA	NA	0.04133	-8.05116
90	1947	Nillson_TopS	1947	1948	NA	1.10687	0.232813	-0.469609	-0.226507	0.718907	-0.344617	0.368068	0.41893	-0.280833	-0.748454	-0.207146	-0.420683	0.133999	0	NA	NA	0.04133	-8.05116
90	1948	Nillson_TopS	1948	1949	NA	1.47051	0.0233789	-0.673319	0.0486789	0.528659	-0.399099	0.182268	0.484601	-0.369874	-0.901649	0.0865955	-0.562324	0.476685	0	NA	NA	0.04133	-8.05116
101	1949	Nillson_TopS	1949	1950	NA	0.979582	0.39378	-1.1017	-0.481231	0.879394	-0.477399	0.388665	0.173695	0.23014	-0.614142	0.129328	-0.197706	0.170475	0	-44395.8	-24324.2	1.66122	-10.7159
71	1950	Nillson_TopS	1950	1951	NA	-1.27237	-0.139269	3.08668	-0.282098	-0.328019	-0.590389	-0.380664	-0.111946	1.34553	-0.583101	-0.472238	0.540774	0.367981	0	NA	NA	-7.2091	4.52457
87	1951	Nillson_TopS	1951	1952	NA	1.80026	-0.515353	-0.47516	0.125393	0.136983	-0.0606369	-0.00241638	0.538301	-0.240941	-0.87472	-0.523149	-0.258956	0.796919	0	NA	NA	-2.80321	-1.98428
90	1952	Nillson_TopS	1952	1953	NA	0.957958	0.370464	-0.523965	-0.292428	0.972407	-0.523363	0.398809	0.4496	-0.126071	-0.764051	-0.518798	-0.282009	0.220099	0	NA	NA	0.04133	-8.05116
87	1953	Nillson_TopS	1953	1954	NA	1.82148	-0.227787	-0.444084	0.362062	0.0962979	-0.254132	-0.317628	0.89321	-0.601365	-0.955729	0.290058	-0.783167	0.657405	0	NA	NA	-2.80321	-1.98428
90	1954	Nillson_TopS	1954	1955	NA	1.21522	0.0214359	-0.576855	-0.236409	0.612874	-0.6155	0.395793	0.294293	0.111646	-0.969147	-0.21578	-0.019143	0.322858	0	NA	NA	0.04133	-8.05116
94	1955	Nillson_TopS	1955	1956	NA	-0.253968	1.59058	-0.571799	-0.521398	1.80952	-0.0929511	0.716836	-2.24436	0.181211	0.220161	1.52419	-0.32126	-0.881288	0	NA	NA	11.5245	-18.2658
78	1956	Nillson_TopS	1956	1957	NA	1.55526	0.0628357	-0.594574	0.0431902	0.427748	-0.324705	0.226493	0.280321	-0.172651	-1.03549	-0.374366	-0.250668	0.531301	0	-53148.6	-26599.1	-1.47521	-5.09834
101	1957	Nillson_TopS	1957	1958	NA	0.620392	0.283718	-0.844164	-0.388678	0.617908	-0.43309	0.30655	0.519612	0.0602812	-0.519872	0.48479	-0.326703	-0.0936195	0	-42241.2	-24544.8	1.66122	-10.7159
89	1958	Nillson_TopS	1958	1959	NA	-1.20496	0.571553	0.35864	1.10707	1.01998	0.16574	0.193242	-2.1584	-0.394058	0.686579	2.04212	-0.174011	-1.00012	0	-1789.95	-22268.7	11.2514	-19.9456
78	1959	Nillson_TopS	1959	1960	NA	1.46641	-0.141159	-0.556683	0.738551	0.394993	-0.407887	0.156611	0.0985526	0.142778	-1.09316	-0.505912	-0.245925	0.370749	0	NA	NA	-1.47521	-5.09834
90	1960	Nillson_TopS	1960	1961	NA	1.13458	0.036221	-0.579487	-0.353671	0.477405	-0.399826	0.210166	0.3289	-0.138658	-0.653782	0.319739	-0.344949	0.224862	0	-47085.3	-26217	0.04133	-8.05116
86	1961	Nillson_TopS	1961	1962	NA	-0.982336	-0.326474	0.316384	0.0158954	-1.0799	0.410334	0.322737	0.693727	0.294813	1.01984	-0.895822	0.763012	0.0920046	0	-302.733	37438.3	-4.2936	8.20126
81	1962	Nillson_TopS	1962	1963	NA	0.449117	0.630176	-0.64439	-0.455223	1.28903	-0.613259	0.621216	0.457216	0.133561	-0.512417	-0.206612	-0.266044	-0.488983	0	NA	NA	3.47305	-13.3053
81	1963	Nillson_TopS	1963	1964	NA	0.591629	0.301633	-0.560021	-0.277756	0.822642	-0.689453	0.401965	0.481557	0.0384493	-0.587157	0.0127679	-0.220294	-0.0554984	0	NA	NA	3.47305	-13.3053
88	1964	Nillson_TopS	1964	1965	NA	-0.604939	0.0143857	0.531386	-0.878362	-1.12853	1.72722	-0.97786	-0.591483	0.913721	1.61099	-0.336806	0.577354	0.136976	0	57020.7	-8665.62	-1.47868	23.5644
87	1965	Nillson_TopS	1965	1966	NA	1.69629	-0.0805509	-0.389509	0.195221	0.213445	-0.201069	0.0215187	-0.164161	-0.119343	-1.06249	-0.185967	-0.245896	0.672929	0	NA	NA	-2.80321	-1.98428
81	1966	Nillson_TopS	1966	1967	NA	0.786474	0.772081	-0.482894	-0.205085	1.21241	-0.416002	0.592018	-0.143774	0.12676	-0.722545	-0.530617	-0.564095	-0.0551172	0	-44218.7	-21944.9	3.47305	-13.3053
69	1967	Nillson_TopS	1967	1968	NA	-0.303228	0.177447	0.599209	-0.585937	-0.660522	1.77397	-0.599621	-1.83085	1.23605	2.02076	-1.44288	0.912092	0.349832	0	58474.8	-2722.12	-2.63306	16.7582
93	1968	Nillson_TopS	1968	1969	NA	-1.30625	-0.504897	0.901542	-0.0239278	-0.935056	-0.01023	0.397284	2.08537	0.232632	0.196454	-0.5838	0.653746	-0.226093	0	-4884.1	29559.8	-4.40299	4.80104
78	1969	Nillson_TopS	1969	1970	NA	1.34668	-0.141994	-0.812952	-0.169177	0.26221	-0.225385	0.0842456	0.636161	-0.0968183	-0.773089	0.0456344	-0.270481	0.458942	0	-50866.8	-27901.9	-1.47521	-5.09834
101	1970	Nillson_TopS	1970	1971	NA	1.19331	0.384792	-0.651649	0.578096	0.906644	-0.485264	0.365799	-0.124391	0.0363323	-0.986806	-0.596453	-0.516007	0.317646	0	NA	NA	1.66122	-10.7159
96	1971	Nillson_TopS	1971	1972	NA	-0.229608	0.620904	-0.897088	0.000518337	1.26694	-0.709773	0.722094	0.750497	0.341885	-0.568071	0.137209	-0.245712	-0.674693	0	-36175.8	-21081.7	5.64891	-15.0421
90	1972	Nillson_TopS	1972	1973	NA	0.973894	0.320988	-0.695205	-0.169162	0.853051	-0.590956	0.308869	0.485789	-0.0614524	-0.843905	-0.106991	-0.327819	0.186716	0	NA	NA	0.04133	-8.05116
87	1973	Nillson_TopS	1973	1974	NA	1.53029	-0.154364	-0.635394	0.200626	0.185221	-0.231582	0.11785	0.563688	-0.249647	-0.90744	-0.417303	-0.19113	0.553082	0	NA	NA	-2.80321	-1.98428
101	1974	Nillson_TopS	1974	1975	NA	0.900346	0.565869	-0.650201	-0.382018	0.953167	-0.683886	0.415751	0.243584	-0.0635219	-0.823388	0.324533	-0.383794	-0.047567	0	NA	NA	1.66122	-10.7159
68	1975	Nillson_TopS	1975	1976	NA	-0.802973	0.267629	2.24298	0.471833	-0.539722	0.385566	-0.555504	-0.153582	-0.130346	0.385583	-0.578368	-0.0223302	-0.162206	0	NA	NA	-7.16747	12.5824
101	1976	Nillson_TopS	1976	1977	NA	0.98845	0.0719922	-0.59932	0.248804	0.679888	-0.51878	0.421515	0.406013	-0.0120917	-0.851939	-0.228547	-0.252574	-0.0605917	0	NA	NA	1.66122	-10.7159
81	1977	Nillson_TopS	1977	1978	NA	0.501819	0.228888	-0.720408	-0.507731	0.79685	-0.375581	0.387457	0.288153	0.36879	-0.560655	0.362743	-0.23398	-0.255155	0	NA	NA	3.47305	-13.3053
90	1978	Nillson_TopS	1978	1979	NA	1.21088	0.207665	-0.506754	-0.175988	0.599238	-0.451309	0.00310628	0.828613	-0.314178	-0.674026	0.11913	-0.670773	0.149007	0	NA	NA	0.04133	-8.05116
101	1979	Nillson_TopS	1979	1980	NA	1.01476	0.528789	-0.777845	-0.194532	1.06445	-0.404349	0.392596	0.203196	-0.0454576	-0.847118	-0.275914	-0.445954	0.17284	0	NA	NA	1.66122	-10.7159
75	1980	Nillson_TopS	1980	1981	NA	1.49502	-0.422927	0.287602	0.0175121	-1.1115	-0.264792	-0.376854	0.589295	-0.403993	-0.111329	0.513705	-0.182721	0.455585	0	-17697.6	3524.56	-3.41715	-0.207763
104	1981	Nillson_TopS	1981	1982	NA	-0.449592	0.0406123	0.316162	-0.725742	-1.23479	1.90304	-1.28022	-1.52618	-0.682314	1.52785	3.04366	0.478383	0.482561	0	48598.4	-17818.1	-1.20331	25.4698
71	1982	Nillson_TopS	1982	1983	NA	-1.49957	-0.193747	3.04753	0.0854623	-0.489821	-0.802524	0.432466	-0.846711	1.51079	-0.620499	-0.87215	1.18115	0.306358	0	14228.8	12365.7	-7.2091	4.52457
87	1983	Nillson_TopS	1983	1984	NA	1.71289	-0.378889	-0.352779	0.158931	0.184012	-0.179188	0.018023	0.0770089	-0.293937	-0.788154	0.0300622	-0.414419	0.547547	0	NA	NA	-2.80321	-1.98428
93	1984	Nillson_TopS	1984	1985	NA	-1.37402	-0.0837644	0.516647	-0.297072	-0.730977	0.0546609	0.441421	2.05419	0.278152	0.613309	-1.11778	0.639834	-0.0590163	0	-3860.27	28698.9	-4.40299	4.80104
94	1985	Nillson_TopS	1985	1986	NA	-0.972442	0.72528	0.250802	-0.806249	1.13624	0.261154	0.170892	-2.06323	-0.145023	0.777092	2.67503	-0.0352811	-0.733448	0	NA	NA	11.5245	-18.2658
88	1986	Nillson_TopS	1986	1987	NA	-0.439073	0.309413	0.217877	-1.01304	-1.14971	1.98503	-1.56138	-1.20142	0.492336	1.27156	1.87607	0.304502	0.328587	0	55396.3	-16553.5	-1.47868	23.5644
90	1987	Nillson_TopS	1987	1988	NA	1.66057	-0.0246053	-0.911905	0.0473713	0.39094	-0.281923	0.257005	0.357297	-0.200992	-0.839812	-0.194175	-0.381455	0.551173	0	NA	NA	0.04133	-8.05116
90	1988	Nillson_TopS	1988	1989	NA	1.23616	0.449273	-0.497772	-0.13384	0.919304	-0.453054	0.318124	0.153348	-0.145787	-0.917524	-0.357288	-0.53545	0.314192	0	NA	NA	0.04133	-8.05116
93	1989	Nillson_TopS	1989	1990	NA	-1.27646	-0.551532	0.521844	0.0717155	-1.04083	0.344108	0.672757	1.7834	0.441275	0.444028	-0.976518	0.681286	-0.27705	0	NA	NA	-4.40299	4.80104
103	1990	Nillson_TopS	1990	1991	NA	-0.17371	-0.0933421	0.0801589	-0.630447	-1.13435	2.14468	-1.09541	-1.40195	-0.770334	2.26945	0.81526	0.896034	0.53715	0	54575.6	-12722.9	-1.77317	21.6487
87	1991	Nillson_TopS	1991	1992	NA	1.15589	-0.482522	-0.333776	-0.309536	-0.0643755	-0.29614	0.0452298	0.63128	-0.0333472	-0.631184	0.313454	-0.0799627	0.31915	0	NA	NA	-2.80321	-1.98428
100	1992	Nillson_TopS	1992	1993	NA	-1.01487	-0.588837	0.550183	-0.555006	-1.46052	0.96925	-1.06593	1.35613	-1.02272	1.77358	2.49108	0.540587	-0.214541	0	28435.2	-13480.4	-0.457409	31.025
71	1993	Nillson_TopS	1993	1994	NA	-1.191	-0.327374	3.40401	-0.243599	-0.225392	-0.578515	-0.18942	-0.491402	1.42714	-0.841348	-0.608534	0.654741	0.434489	0	14532.6	11175.7	-7.2091	4.52457
94	1994	Nillson_TopS	1994	1995	NA	-0.697248	0.988145	-0.30172	-0.764915	1.45892	0.452332	0.59364	-2.37187	0.0632039	1.00369	1.67703	0.11666	-0.780679	0	537.087	-26436.3	11.5245	-18.2658
71	1995	Nillson_TopS	1995	1996	NA	-1.33792	-0.236106	3.37837	-0.271079	-0.458948	-0.647704	-0.298847	-0.0481889	1.53828	-0.556599	-0.757018	0.701121	0.259233	0	NA	NA	-7.2091	4.52457
101	1996	Nillson_TopS	1996	1997	NA	1.06337	0.550811	-0.860221	-0.0240092	1.04971	-0.526648	0.500077	0.0924314	-0.0855238	-0.767825	-0.413787	-0.190444	0.0250966	0	-46044	-23272.4	1.66122	-10.7159
89	1997	Nillson_TopS	1997	1998	NA	-0.792887	0.405442	-0.214353	0.678844	0.636704	0.268586	-0.170173	-0.314938	-0.709978	0.798122	0.736271	-0.116511	-0.870468	0	-5389.39	-21690.2	11.2514	-19.9456
[truncated: 42,142 more rows]

## Sheet: Nilsson_noTopS_clusteringOutput
Supplemental Table 3. X-shift/vortex clustering output using original/transformed values
ClusterID	EventID	File Name	Index in File	Event Name	Comment	CD10:CD10	CD110:CD110	CD11b:CD11b	CD123:CD123	CD19:CD19	CD3:CD3	CD34:CD34	CD38:CD38	CD4:CD4	CD45:CD45	CD45RA:CD45RA	CD49fpur:CD49fpur	CD90bio:CD90bio	label:label	FDL-X	FDL-Y	MST-X	MST-Y
65	0	Nillson_orig	0	1	NA	0.364281	0.183767	1.00964	1.07389	0.494895	1.23653	2.12412	2.20614	2.29037	2.04754	1.09325	3.54726	1.58943	0	NA	NA	-6.07169	-1.77634
59	1	Nillson_orig	1	2	NA	2.1015	2.31913	2.14026	1.20313	2.614	4.13627	3.47248	4.12685	3.3819	4.90233	3.3342	5.75797	3.33074	0	16436.5	17194.1	9.97281	6.60819
55	2	Nillson_orig	2	3	NA	3.45136	1.81512	1.69287	2.66177	2.26555	3.19338	3.35725	3.8547	3.77379	2.242	2.25094	3.63473	5.21288	0	NA	NA	14.5523	7.90226
48	3	Nillson_orig	3	4	NA	1.62511	1.60268	4.57229	1.64979	1.78117	2.72097	3.12676	3.48769	5.97731	3.19482	1.17042	5.50598	3.83056	0	-17555.5	11331.5	-2.67048	-5.73589
50	4	Nillson_orig	4	5	NA	3.23353	2.40233	0.929924	2.05057	2.57992	2.96381	3.79058	3.68227	4.19976	2.6091	2.439	4.63542	4.91776	0	NA	NA	13.192	7.50601
55	5	Nillson_orig	5	6	NA	3.50853	1.91798	1.09318	2.60988	2.19286	3.32827	3.43154	3.42116	4.45266	2.10976	1.87093	4.62064	5.18908	0	NA	NA	14.5523	7.90226
38	6	Nillson_orig	6	7	NA	0.504654	0.887804	2.18645	2.00529	0.214386	1.56642	1.07672	2.27659	1.64499	2.48574	0.539917	2.75626	2.0079	0	-4742.7	-8270.68	-3.64076	-6.33593
58	7	Nillson_orig	7	8	NA	1.06097	1.88549	4.05516	1.52593	1.53388	2.26287	2.93646	3.34865	6.282	3.09011	1.18095	4.98761	3.15693	0	-18237.9	10322.6	-3.38445	-5.0793
55	8	Nillson_orig	8	9	NA	3.40069	1.29445	0.983343	2.43711	2.0324	3.03405	3.38406	3.8524	3.91874	2.62257	2.44913	4.27504	4.94276	0	NA	NA	14.5523	7.90226
55	9	Nillson_orig	9	10	NA	3.13489	2.14322	1.07416	2.50125	2.46861	2.73756	3.82025	4.23295	4.60404	2.78664	2.35213	4.96988	4.70268	0	NA	NA	14.5523	7.90226
65	10	Nillson_orig	10	11	NA	1.26519	0.17701	2.45971	3.38835	0.641687	2.24268	2.85179	3.71453	3.7155	3.31073	2.27961	4.72789	2.78503	0	NA	NA	-6.07169	-1.77634
55	11	Nillson_orig	11	12	NA	3.29622	2.23632	1.40466	2.56317	2.48757	3.30782	3.97432	4.25174	4.70682	2.68636	2.28895	5.18905	4.94894	0	NA	NA	14.5523	7.90226
50	12	Nillson_orig	12	13	NA	2.70825	2.35192	1.33242	1.26219	2.54982	2.25712	3.66734	3.92911	4.05471	2.65198	2.43657	4.30743	3.77764	0	NA	NA	13.192	7.50601
48	13	Nillson_orig	13	14	NA	1.49184	1.90723	6.40252	2.29759	1.81353	2.98992	3.4107	2.38079	6.76103	3.55769	1.70035	7.243	5.06847	0	-17313.1	14952.4	-2.67048	-5.73589
45	14	Nillson_orig	14	15	NA	1.22577	2.33853	1.90858	2.85801	2.5203	3.27023	3.10276	2.07606	2.95281	3.85221	3.17528	4.19566	2.27165	0	21133.3	21012.7	7.96003	6.1188
50	15	Nillson_orig	15	16	NA	2.66466	3.19365	1.31538	1.74077	3.09262	2.46335	4.27022	3.5302	5.04909	2.56935	1.64623	4.67292	3.94167	0	NA	NA	13.192	7.50601
55	16	Nillson_orig	16	17	NA	3.40635	2.39498	1.22207	2.79405	2.78021	3.1371	3.86887	3.88825	4.43704	2.8574	2.51147	4.09944	5.04368	0	NA	NA	14.5523	7.90226
48	17	Nillson_orig	17	18	NA	1.47404	1.81223	6.27081	1.78223	2.09414	2.67432	3.50272	3.15155	7.03329	2.81366	1.88513	6.97239	4.97843	0	-18854.9	15710.3	-2.67048	-5.73589
58	18	Nillson_orig	18	19	NA	0.419676	1.40332	2.63031	1.18314	1.2011	1.70405	2.08209	3.38643	5.50803	2.3337	0.520954	3.78032	1.8452	0	-19328.5	9003.6	-3.38445	-5.0793
50	19	Nillson_orig	19	20	NA	3.12719	2.32108	1.34371	2.10351	2.66376	2.81577	3.81863	4.34441	4.47142	2.68636	2.37707	4.50738	4.33723	0	NA	NA	13.192	7.50601
40	20	Nillson_orig	20	21	NA	2.01655	2.05249	1.76627	0.389458	0.944933	5.80132	1.81305	3.5033	2.66123	5.71316	1.25919	6.6344	4.38554	0	21146.5	-28218.7	-3.47823	11.7918
49	21	Nillson_orig	21	22	NA	2.0175	3.83139	1.59178	2.70595	3.5267	4.77518	4.66757	1.96321	5.33132	5.46745	3.85952	6.7066	3.81057	0	25408.9	20029.9	5.24291	5.5472
55	22	Nillson_orig	22	23	NA	3.37994	2.04765	1.66931	2.49424	2.49589	3.1402	3.45565	4.29065	3.90327	2.70319	3.02454	3.86483	4.86902	0	NA	NA	14.5523	7.90226
55	23	Nillson_orig	23	24	NA	2.9732	2.10214	1.17993	2.86372	2.42994	2.85995	3.70134	4.20592	4.56311	2.469	2.9156	4.74589	4.23939	0	NA	NA	14.5523	7.90226
55	24	Nillson_orig	24	25	NA	3.04335	2.78909	1.39371	3.00822	2.85352	2.86561	3.91535	4.26303	4.71533	2.33181	2.31582	4.13471	4.32422	0	NA	NA	14.5523	7.90226
53	25	Nillson_orig	25	26	NA	1.23095	0.304228	1.55681	0.537207	-0.015264	1.04976	0.0359958	0.613212	0.0266784	1.66894	0.305427	1.32614	1.10433	0	-853.424	-5869.23	-3.77639	-7.40221
51	26	Nillson_orig	26	27	NA	0.740469	0.143148	1.77523	1.56042	0.328301	2.61264	2.68977	3.12	3.5772	3.03095	0.566054	4.08571	3.25853	0	-26090.6	-9499.67	-2.25153	1.00994
57	27	Nillson_orig	27	28	NA	1.75337	2.85555	1.47435	0.916439	2.89638	4.43161	3.77679	0.63986	4.4303	5.1326	4.32053	5.99987	3.49715	0	28646.8	15773.9	3.2205	4.62054
62	28	Nillson_orig	28	29	NA	1.33602	1.67511	4.27402	1.4553	1.55443	4.02972	2.91839	3.01457	6.25283	4.82721	1.46006	6.13365	3.34406	0	-3575.14	-697.334	-1.01925	2.85792
55	29	Nillson_orig	29	30	NA	3.24919	2.27537	1.32108	2.62626	2.60527	3.09134	4.01459	3.98425	5.02124	2.39248	2.60323	5.11088	4.97208	0	NA	NA	14.5523	7.90226
50	30	Nillson_orig	30	31	NA	2.47539	2.27941	0.712565	1.04588	2.39556	2.52446	3.78152	3.78136	4.11866	2.80216	2.58876	4.76372	3.70917	0	NA	NA	13.192	7.50601
38	31	Nillson_orig	31	32	NA	0.44782	0.680686	2.78165	1.62226	0.236219	1.47425	0.756142	2.06393	2.29037	2.67927	0.719532	2.76653	1.73883	0	NA	NA	-3.64076	-6.33593
55	32	Nillson_orig	32	33	NA	3.06606	1.49742	0.81977	2.00529	1.93455	2.99164	2.94834	4.17056	3.20384	3.01165	2.90124	3.75135	4.59838	0	NA	NA	14.5523	7.90226
50	33	Nillson_orig	33	34	NA	2.79815	2.28946	0.690681	1.53749	2.57469	2.66783	3.77577	3.70677	4.72942	2.88291	2.76665	4.83735	4.08366	0	NA	NA	13.192	7.50601
50	34	Nillson_orig	34	35	NA	2.8907	2.68869	0.690681	1.93053	2.82471	2.31632	3.6966	3.92176	4.05045	2.58786	2.13859	3.63817	3.71334	0	NA	NA	13.192	7.50601
43	35	Nillson_orig	35	36	NA	2.01112	2.38203	1.89195	0.455583	1.14585	5.72325	1.89007	2.19945	5.14009	4.98932	1.2098	5.89833	4.25272	0	15445.2	-33730	-1.06957	4.73784
55	36	Nillson_orig	36	37	NA	3.07722	2.63069	2.24156	2.78217	2.73665	2.84666	3.94698	4.38331	4.58267	2.53945	2.37915	4.8259	4.32578	0	-1186.79	37546.5	14.5523	7.90226
50	37	Nillson_orig	37	38	NA	3.20309	2.78103	0.929924	2.97922	2.83255	2.93184	4.05964	3.54082	4.54014	2.33745	2.08702	4.61427	4.5692	0	NA	NA	13.192	7.50601
48	38	Nillson_orig	38	39	NA	1.44229	1.58226	6.06783	1.73026	1.89231	2.57848	3.39334	3.76136	6.85042	3.07481	1.76757	6.59216	4.61146	0	-19472.4	14377.5	-2.67048	-5.73589
50	39	Nillson_orig	39	40	NA	2.23265	1.82951	1.11831	1.78736	2.21719	1.86854	3.09571	3.17958	3.5772	1.99942	1.44768	3.89529	3.04136	0	NA	NA	13.192	7.50601
62	40	Nillson_orig	40	41	NA	1.47978	0.945472	4.49554	1.41915	0.763042	4.24356	1.50168	2.68086	4.56724	4.85935	1.74905	5.58354	4.02975	0	NA	NA	-1.01925	2.85792
48	41	Nillson_orig	41	42	NA	1.12756	2.61538	1.70686	0.82708	2.67336	1.74479	3.65601	5.55625	3.47133	2.80984	1.48879	3.18148	1.97194	0	NA	NA	-2.67048	-5.73589
50	42	Nillson_orig	42	43	NA	3.428	3.21273	2.25169	2.947	3.07967	3.71641	4.3	4.10728	5.3783	3.37958	2.89565	5.50598	5.12975	0	NA	NA	13.192	7.50601
50	43	Nillson_orig	43	44	NA	3.20168	2.61538	1.78414	2.30542	2.70433	3.29263	3.83383	4.44255	4.57137	3.07277	2.90597	4.7814	4.78318	0	NA	NA	13.192	7.50601
50	44	Nillson_orig	44	45	NA	2.58839	2.0306	1.14933	1.6931	2.38002	2.04411	3.24433	3.5751	3.44068	2.41909	1.94228	3.84015	3.5791	0	NA	NA	13.192	7.50601
50	45	Nillson_orig	45	46	NA	2.614	1.24343	1.43713	2.06394	1.95886	2.12484	3.43762	4.2094	3.94626	2.0546	2.37654	4.43903	3.63073	0	NA	NA	13.192	7.50601
51	46	Nillson_orig	46	47	NA	0.880798	0.472897	1.30967	1.7771	0.638993	2.98819	2.82146	1.34481	3.93104	3.79386	1.1137	4.91205	3.4306	0	NA	NA	-2.25153	1.00994
49	47	Nillson_orig	47	48	NA	1.46533	2.06925	1.65502	1.82287	2.44576	4.23024	3.08731	1.67506	3.36688	4.99429	3.32572	5.06045	3.16959	0	24285	16975.5	5.24291	5.5472
55	48	Nillson_orig	48	49	NA	3.61773	2.30339	2.65137	3.37788	2.69828	3.62665	4.13547	3.65167	5.19217	2.85125	2.95125	5.53172	5.47722	0	NA	NA	14.5523	7.90226
45	49	Nillson_orig	49	50	NA	1.69958	3.04662	2.82196	3.97208	3.02733	4.36303	3.9556	2.60107	4.64495	5.03256	3.69421	5.87125	2.94047	0	21128	21532.5	7.96003	6.1188
65	50	Nillson_orig	50	51	NA	1.68344	0.535646	2.04378	2.54277	0.846886	2.59681	3.23703	3.59692	3.45097	3.38435	2.67754	4.75978	3.07832	0	NA	NA	-6.07169	-1.77634
50	51	Nillson_orig	51	52	NA	3.05588	2.44193	1.72075	2.23379	2.62366	3.00022	3.61104	4.09232	4.30644	2.49568	2.73186	3.64499	4.25272	0	NA	NA	13.192	7.50601
55	52	Nillson_orig	52	53	NA	3.17444	1.78591	0.571601	1.93053	2.28076	2.90644	3.01767	4.14154	3.45097	2.37804	1.45234	3.64158	4.53848	0	NA	NA	14.5523	7.90226
50	53	Nillson_orig	53	54	NA	2.85734	2.14995	1.25755	1.98687	2.45997	2.7782	3.49922	4.0285	4.2521	2.75234	2.17597	4.13471	4.0304	0	NA	NA	13.192	7.50601
50	54	Nillson_orig	54	55	NA	2.9297	3.86004	2.285	2.3781	3.5277	3.44128	4.84813	4.24857	5.89367	3.67037	3.0538	5.46882	4.48222	0	NA	NA	13.192	7.50601
50	55	Nillson_orig	55	56	NA	3.08283	3.34283	1.16774	2.86372	3.20298	3.02902	4.43276	3.69894	5.2399	2.80087	2.29819	4.34902	4.60977	0	NA	NA	13.192	7.50601
55	56	Nillson_orig	56	57	NA	3.22637	2.14098	0.854665	2.28974	2.46734	3.16629	3.57928	3.79892	4.23696	2.49898	1.97918	4.49164	4.71282	0	NA	NA	14.5523	7.90226
55	57	Nillson_orig	57	58	NA	3.01768	1.44925	1.98151	3.31366	1.90611	2.45835	3.49392	4.2041	4.00724	2.01889	2.06683	4.69345	4.30843	0	-3343.7	38342.6	14.5523	7.90226
50	58	Nillson_orig	58	59	NA	2.68106	1.49011	1.09318	1.1085	1.96947	2.48072	3.27629	4.01889	4.00724	2.66211	2.70409	4.27254	3.75198	0	NA	NA	13.192	7.50601
50	59	Nillson_orig	59	60	NA	2.98072	2.84023	1.48486	2.66815	2.95724	2.5482	4.0733	3.36948	4.82211	2.56468	2.32644	4.75978	4.32788	0	NA	NA	13.192	7.50601
48	60	Nillson_orig	60	61	NA	0.902423	0.337216	2.99234	0.864606	0.551867	1.44079	1.72362	1.49385	3.12843	1.79241	0.177788	2.76653	2.11611	0	-19141.5	12953.4	-2.67048	-5.73589
43	61	Nillson_orig	61	62	NA	1.63312	1.97038	2.22454	0.36449	1.18836	5.09879	1.95475	0.962831	5.30929	5.06613	0.54368	5.83921	3.86221	0	14446.1	-35502.5	-1.06957	4.73784
50	62	Nillson_orig	62	63	NA	3.09942	2.84664	1.5057	2.64572	2.91356	3.03739	4.18224	4.16539	4.85186	2.91961	2.39208	5.11088	4.56572	0	NA	NA	13.192	7.50601
49	63	Nillson_orig	63	64	NA	1.87395	2.44901	1.06779	1.96359	2.5382	4.14529	3.26647	2.95347	3.56384	4.94381	3.68276	5.58616	3.50597	0	21493.7	17975.6	5.24291	5.5472
55	64	Nillson_orig	64	65	NA	3.08919	2.07164	1.25755	1.77194	2.47989	2.95147	3.44134	3.80171	3.79886	2.43307	1.83288	3.54726	4.37401	0	NA	NA	14.5523	7.90226
55	65	Nillson_orig	65	66	NA	2.97127	2.58889	1.56687	2.9739	2.77427	2.8099	3.79726	4.32692	4.54957	2.75902	2.53169	4.88064	4.23155	0	NA	NA	14.5523	7.90226
48	66	Nillson_orig	66	67	NA	0.662063	0.663005	3.525	0.84214	1.14885	1.20934	2.33542	2.95284	4.63506	1.96209	0.692985	3.49296	2.19344	0	NA	NA	-2.67048	-5.73589
52	67	Nillson_orig	67	68	NA	0.595141	0.485549	1.80625	1.96359	0.709303	2.40215	2.80047	3.13073	3.53488	3.32247	0.474449	4.55606	2.21404	0	NA	NA	-3.75756	-1.24512
50	68	Nillson_orig	68	69	NA	3.22344	2.73152	1.48486	2.49776	2.67621	3.08653	4.02671	3.98312	5.01499	2.73483	2.42777	5.19702	4.75827	0	NA	NA	13.192	7.50601
43	69	Nillson_orig	69	70	NA	1.86038	1.69105	1.21011	0.29751	0.816069	5.46618	1.54216	1.18845	3.98519	5.54608	0.573434	6.33601	4.08617	0	17579.4	-34543.2	-1.06957	4.73784
55	70	Nillson_orig	70	71	NA	3.2924	2.81427	2.09643	3.23548	2.92024	3.0556	4.01595	4.12343	4.4065	2.73618	2.83546	3.87096	4.7732	0	NA	NA	14.5523	7.90226
55	71	Nillson_orig	71	72	NA	3.30024	2.41507	0.943384	2.24592	2.6745	3.1057	3.78656	3.81004	4.41221	2.47907	2.06758	3.97242	4.70854	0	NA	NA	14.5523	7.90226
58	72	Nillson_orig	72	73	NA	0.890857	0.908979	3.60655	1.44932	1.31812	1.53014	3.22343	2.74001	5.35053	2.17974	0.497876	5.85758	3.19085	0	-18210.5	9623.75	-3.38445	-5.0793
55	73	Nillson_orig	73	74	NA	3.26728	2.78909	1.28666	2.69345	2.8968	3.07359	4.0835	4.25915	4.49536	2.71704	2.51013	4.23446	4.78428	0	NA	NA	14.5523	7.90226
50	74	Nillson_orig	74	75	NA	2.60872	2.69882	0.996525	1.40085	2.76525	2.28561	4.00645	4.01961	4.69061	2.57864	2.243	4.65425	3.63958	0	NA	NA	13.192	7.50601
42	75	Nillson_orig	75	76	NA	2.00887	0.800737	1.93731	3.87065	1.031	2.57155	2.80639	3.28657	3.37118	3.23949	2.24361	4.26498	3.33741	0	-17225.9	1553.64	-7.45296	-2.51937
50	76	Nillson_orig	76	77	NA	3.34708	2.83766	1.72075	2.54277	2.82887	3.65687	4.30413	4.12374	5.28627	3.40168	3.00411	5.78068	5.1012	0	NA	NA	13.192	7.50601
65	77	Nillson_orig	77	78	NA	1.02309	1.17269	2.48607	3.14386	1.32413	2.74783	4.23849	3.11251	5.41112	3.47009	2.49075	6.65519	3.54351	0	NA	NA	-6.07169	-1.77634
65	78	Nillson_orig	78	79	NA	1.79026	0.680686	2.26843	4.00694	0.973389	2.80205	3.18095	3.27955	3.81537	3.46786	2.84713	5.06045	3.43577	0	NA	NA	-6.07169	-1.77634
55	79	Nillson_orig	79	80	NA	3.4307	2.17648	0.976726	2.50476	2.5359	3.43252	3.73216	4.13541	4.25586	2.91377	2.76501	5.05362	5.04729	0	NA	NA	14.5523	7.90226
50	80	Nillson_orig	80	81	NA	2.93663	1.72856	0.579157	1.3576	1.98878	2.7762	3.41975	3.41133	3.9523	2.76301	2.43852	4.60148	4.25603	0	NA	NA	13.192	7.50601
50	81	Nillson_orig	81	82	NA	2.91041	2.40049	1.14933	1.56611	2.65931	2.67	3.77645	3.47452	4.45042	2.46562	2.50207	4.84874	4.17415	0	NA	NA	13.192	7.50601
38	82	Nillson_orig	82	83	NA	0.425361	0.903708	2.12213	1.6931	0.39597	1.53929	0.812087	2.23673	2.31047	2.40497	0.719532	2.56833	0.991325	0	NA	NA	-3.64076	-6.33593
58	83	Nillson_orig	83	84	NA	0.910573	1.03608	2.8658	1.10161	0.925412	2.32733	1.82557	3.69737	4.81679	2.9541	0.505607	4.06075	2.21404	0	-18402	8359.85	-3.38445	-5.0793
58	84	Nillson_orig	84	85	NA	1.02587	0.828354	3.12268	0.758499	1.02577	1.12542	1.71907	2.93359	4.28933	2.3412	0.909373	3.33305	1.90043	0	-19355.1	9967.56	-3.38445	-5.0793
55	85	Nillson_orig	85	86	NA	3.63072	1.72856	1.2982	2.98188	2.3301	3.55499	3.79426	3.96446	4.3962	2.65633	2.65199	4.97877	5.48606	0	NA	NA	14.5523	7.90226
55	86	Nillson_orig	86	87	NA	3.09826	1.64921	1.14316	1.8627	2.05684	3.04735	3.1205	3.77861	3.91103	2.36527	2.34347	3.68886	4.48823	0	NA	NA	14.5523	7.90226
50	87	Nillson_orig	87	88	NA	3.01547	2.80637	1.2161	2.24189	2.88338	2.81186	4.11892	3.90635	4.96565	2.79443	2.71252	5.01567	4.40289	0	NA	NA	13.192	7.50601
55	88	Nillson_orig	88	89	NA	3.28244	2.00835	1.28087	2.54619	2.36181	3.11045	3.48325	4.10614	4.01307	2.32047	1.97159	4.03268	4.72942	0	NA	NA	14.5523	7.90226
58	89	Nillson_orig	89	90	NA	0.856794	1.11284	2.78644	0.758499	1.35347	1.74076	2.88364	5.14889	5.32811	2.63147	1.09783	4.49615	2.43347	0	-19311.7	6424.33	-3.38445	-5.0793
55	90	Nillson_orig	90	91	NA	3.37994	2.92221	1.186	2.66815	2.85307	3.27868	3.94004	4.10679	4.48016	2.7321	2.34998	4.67498	4.83196	0	NA	NA	14.5523	7.90226
57	91	Nillson_orig	91	92	NA	1.83741	3.22966	2.65919	1.54324	3.12246	4.63682	3.99741	1.57621	4.59797	5.23814	4.4104	6.1076	3.48827	0	NA	NA	3.2205	4.62054
55	92	Nillson_orig	92	93	NA	3.25457	1.98061	1.90858	3.45787	2.31776	2.64161	3.66508	4.11216	4.12003	2.36894	2.04147	4.7077	4.71942	0	NA	NA	14.5523	7.90226
59	93	Nillson_orig	93	94	NA	2.86665	3.19173	1.95754	2.91417	3.09964	3.75174	4.12674	4.1111	4.78548	4.19838	3.06005	4.92484	4.11288	0	9033.46	28938.9	9.97281	6.60819
55	94	Nillson_orig	94	95	NA	3.01782	1.39162	0.854665	2.14229	1.84034	2.65696	2.48184	3.79939	3.06244	2.8901	2.94282	3.00465	4.41271	0	NA	NA	14.5523	7.90226
50	95	Nillson_orig	95	96	NA	2.97638	3.07239	0.963441	1.79247	3.01004	2.84091	4.03152	3.50741	4.7891	2.71014	2.47742	4.23702	4.286	0	NA	NA	13.192	7.50601
51	96	Nillson_orig	96	97	NA	1.10317	0.434644	1.66931	0.750799	0.560611	2.85995	2.98249	2.30152	3.78888	3.56523	0.820042	4.9303	3.97078	1	-24615.9	-12358.6	-2.25153	1.00994
50	97	Nillson_orig	97	98	NA	2.59699	2.76065	1.46379	2.25397	2.80384	2.08663	4.12381	4.37906	4.5939	2.79055	2.90734	4.99291	3.76728	0	NA	NA	13.192	7.50601
65	98	Nillson_orig	98	99	NA	1.79338	0.428226	1.93324	2.69658	1.01697	2.76613	3.36925	3.82421	4.45155	3.52707	2.54248	5.55447	3.18214	0	NA	NA	-6.07169	-1.77634
55	99	Nillson_orig	99	100	NA	3.20564	1.69105	1.29244	2.36682	2.27616	2.81772	3.32818	3.85623	3.80383	2.51533	2.53904	3.86483	4.65157	0	NA	NA	14.5523	7.90226
50	100	Nillson_orig	100	101	NA	3.19811	3.80436	1.81501	2.42254	3.48232	3.1057	4.75451	4.37662	5.59182	3.1436	2.01935	5.37937	4.74241	0	NA	NA	13.192	7.50601
50	101	Nillson_orig	101	102	NA	3.21713	2.09981	1.54163	2.54277	2.50508	3.14329	3.90849	3.86675	4.65673	2.75902	2.54846	5.0757	4.59114	0	NA	NA	13.192	7.50601
50	102	Nillson_orig	102	103	NA	2.42388	2.20889	0.586696	1.62779	2.51558	2.33553	3.83639	3.86123	3.95532	2.58018	2.41388	4.18256	3.63958	0	NA	NA	13.192	7.50601
54	103	Nillson_orig	103	104	NA	1.62453	1.58226	3.0152	0.230024	0.804801	4.98016	1.39556	1.99966	4.85099	4.73323	3.58486	5.43662	4.08177	0	22733.5	-33832.3	0.0451748	4.57278
50	104	Nillson_orig	104	105	NA	2.69514	3.21746	2.10749	1.85777	3.02181	2.93004	4.23168	3.92428	5.31319	2.96539	2.64368	5.03301	4.0868	0	NA	NA	13.192	7.50601
64	105	Nillson_orig	105	106	NA	1.79606	1.77403	2.18645	0.545301	0.770136	5.35328	1.65344	1.05341	2.76919	5.32841	2.52515	6.24495	3.84874	0	25647.4	-30467.5	-2.73549	10.3785
50	106	Nillson_orig	106	107	NA	3.24097	2.14771	1.90029	2.947	2.46455	2.85806	3.76143	4.15844	4.80256	2.53786	2.02573	4.78531	4.7481	0	NA	NA	13.192	7.50601
55	107	Nillson_orig	107	108	NA	3.14938	1.14993	1.63095	3.26943	1.83493	3.03071	3.05574	3.71607	3.41784	2.65052	3.05264	3.85253	4.63435	0	NA	NA	14.5523	7.90226
38	108	Nillson_orig	108	109	NA	0.442248	0.772747	2.43889	1.41915	0.409148	1.56642	1.12202	1.55786	1.58178	2.50882	0.458637	2.89607	1.63581	0	NA	NA	-3.64076	-6.33593
55	109	Nillson_orig	109	110	NA	3.01782	1.88823	1.11205	1.71442	2.38145	2.81968	3.8009	3.88055	4.1336	2.38167	2.46103	4.92302	4.47105	0	NA	NA	14.5523	7.90226
38	110	Nillson_orig	110	111	NA	0.802667	0.761447	3.15312	0.938401	0.342066	2.07041	1.26278	1.66551	2.36171	2.75501	0.474449	3.45598	1.98102	0	-2766.16	-7018.68	-3.64076	-6.33593
55	111	Nillson_orig	111	112	NA	3.25899	2.47861	0.889132	2.35166	2.44524	2.89358	3.79058	3.60001	4.18937	2.38167	2.54333	4.42742	4.82235	0	NA	NA	14.5523	7.90226
50	112	Nillson_orig	112	113	NA	3.13442	2.53908	1.09318	2.24994	2.67621	2.96206	4.02027	3.92237	4.73128	3.1032	2.94176	5.11752	4.58986	0	NA	NA	13.192	7.50601
55	113	Nillson_orig	113	114	NA	3.15614	2.74548	1.64543	2.85801	2.90211	2.9101	3.94091	3.89308	4.52429	2.7983	2.62642	4.56263	4.66615	0	NA	NA	14.5523	7.90226
41	114	Nillson_orig	114	115	NA	1.35177	0.54185	2.53188	0.512848	0.214386	4.58398	1.36828	0.996683	3.35606	5.28542	3.62418	6.09546	3.60652	0	27580.6	-23794.4	-0.679458	7.79676
50	115	Nillson_orig	115	116	NA	2.28078	2.86062	0.697992	1.64431	2.89301	2.27429	4.20079	3.91831	5.05446	3.00515	2.80849	5.27501	3.28881	0	NA	NA	13.192	7.50601
45	116	Nillson_orig	116	117	NA	1.81921	3.38958	2.3014	3.82954	3.33505	4.29757	4.29024	1.95634	4.83178	5.00213	3.85626	5.88597	3.21907	0	22709	21749.8	7.96003	6.1188
50	117	Nillson_orig	117	118	NA	2.80909	1.44925	1.19809	1.8872	2.00233	2.68292	3.76143	3.7212	4.74061	2.74833	2.65312	5.13728	4.40928	0	NA	NA	13.192	7.50601
50	118	Nillson_orig	118	119	NA	2.28248	2.90892	2.1759	1.79757	3.01255	3.07033	3.99521	4.49001	4.25586	3.73073	2.75044	4.47121	3.31504	0	NA	NA	13.192	7.50601
50	119	Nillson_orig	119	120	NA	3.52869	2.15663	1.24578	2.86372	2.57992	3.55039	4.04027	3.90336	4.99607	2.7683	2.52471	5.46744	5.23782	0	-3097.28	37262.5	13.192	7.50601
65	120	Nillson_orig	120	121	NA	0.728247	0.122774	1.42096	1.4553	0.575033	2.21038	3.16239	3.50905	3.93562	2.98211	1.6312	4.86382	2.59377	0	-24026.1	-4506.5	-6.07169	-1.77634
38	121	Nillson_orig	121	122	NA	0.458882	1.11752	2.95203	1.85282	0.359112	2.07041	1.03384	2.12948	1.73903	2.88051	0.837921	3.09928	1.68082	0	NA	NA	-3.64076	-6.33593
50	122	Nillson_orig	122	123	NA	3.09654	1.97295	1.55681	2.27393	2.42941	2.7981	3.94381	4.51799	4.77005	2.7321	2.00481	5.3204	4.70072	0	NA	NA	13.192	7.50601
50	123	Nillson_orig	123	124	NA	3.14603	2.53908	1.12455	1.94949	2.66934	2.84666	3.89222	3.7194	4.7238	2.68777	2.34456	4.82207	4.43981	0	NA	NA	13.192	7.50601
38	124	Nillson_orig	124	125	NA	0.515135	1.62615	3.11883	2.0595	0.331753	2.03747	0.952384	2.7165	2.89378	2.70875	0.81099	3.43346	2.2217	0	-5548.98	-7219.24	-3.64076	-6.33593
48	125	Nillson_orig	125	126	NA	1.10317	0.80629	3.42466	0.455583	0.971519	1.17062	1.46828	2.63649	4.71439	1.61751	0.952658	2.66692	1.18614	0	NA	NA	-2.67048	-5.73589
55	126	Nillson_orig	126	127	NA	3.39351	2.14322	1.47435	3.34607	2.35799	3.30782	3.52055	4.1834	4.63803	2.574	2.44287	4.19828	5.04428	0	NA	NA	14.5523	7.90226
50	127	Nillson_orig	127	128	NA	3.25501	4.34931	2.74272	2.84081	3.76696	3.98753	5.19055	4.57395	6.43406	4.1129	3.42829	6.10256	4.98096	0	NA	NA	13.192	7.50601
55	128	Nillson_orig	128	129	NA	3.46536	2.35763	1.93324	2.84944	2.69643	3.5823	3.94062	3.84911	4.38234	2.78274	2.23561	4.79311	5.10063	0	-3494.85	37973.5	14.5523	7.90226
55	129	Nillson_orig	129	130	NA	3.59599	1.753	1.5057	3.224	2.13844	3.58004	3.09055	3.87223	2.99375	2.58172	2.40685	3.84015	5.34313	0	NA	NA	14.5523	7.90226
62	130	Nillson_orig	130	131	NA	1.41686	0.950628	3.732	1.90657	1.08155	4.31025	2.3183	3.15254	4.64101	4.97112	0.98139	6.01154	3.68041	0	67.7697	-4723.07	-1.01925	2.85792
50	131	Nillson_orig	131	132	NA	3.14168	1.21728	1.08052	2.02806	2.01044	2.83707	3.50667	4.12006	4.12003	1.99449	2.08996	4.68526	4.58043	0	NA	NA	13.192	7.50601
59	132	Nillson_orig	132	133	NA	2.43069	2.63677	2.34327	3.1797	2.71735	5.07276	3.51667	4.51048	3.8892	5.68541	4.43005	6.66055	4.09181	0	14704.7	17831.1	9.97281	6.60819
41	133	Nillson_orig	133	134	NA	1.30152	0.389482	1.90444	0.238483	0.441561	4.48936	1.33725	3.49835	2.08061	5.06165	2.89537	5.68329	3.69403	0	21707.7	-17118.6	-0.679458	7.79676
56	134	Nillson_orig	134	135	NA	1.98226	1.97295	2.65137	0.162141	0.673468	5.74465	1.1766	0.744873	2.11208	5.60606	4.30854	6.49909	4.50155	0	29194.3	-29729.1	-1.92631	8.83926
59	135	Nillson_orig	135	136	NA	2.4918	2.77968	4.77738	4.55539	2.82964	4.50502	3.91951	4.42156	5.76758	5.04907	3.58584	6.71925	4.45978	0	12370.9	17666.6	9.97281	6.60819
55	136	Nillson_orig	136	137	NA	3.05294	2.30537	1.30394	2.57328	2.49856	2.68932	3.61656	3.76246	3.94475	2.20293	1.9536	3.73836	4.502	0	NA	NA	14.5523	7.90226
59	137	Nillson_orig	137	138	NA	2.384	3.09554	2.82196	4.09374	2.91027	4.1742	4.65403	3.74524	6.11919	4.88818	3.98146	7.99528	4.57785	0	10817.2	16215.6	9.97281	6.60819
54	138	Nillson_orig	138	139	NA	1.77803	1.91798	2.01293	0.263824	0.833807	5.26181	1.27275	2.12867	4.01016	4.74041	3.27434	5.11586	3.92899	0	22543.1	-35084.3	0.0451748	4.57278
55	139	Nillson_orig	139	140	NA	3.50419	2.30537	2.11848	3.72549	2.53128	3.23885	3.71435	3.85196	4.07585	2.62108	2.50835	4.83735	5.37112	0	NA	NA	14.5523	7.90226
50	140	Nillson_orig	140	141	NA	3.20445	2.41869	1.42637	2.09916	2.60736	2.9101	3.9031	3.78017	4.77552	2.53626	2.48295	4.84874	4.72636	0	NA	NA	13.192	7.50601
50	141	Nillson_orig	141	142	NA	3.10756	2.43126	1.5467	1.90175	2.59874	2.64822	3.83222	3.52057	4.47579	2.68777	2.6237	5.23484	4.47711	0	NA	NA	13.192	7.50601
55	142	Nillson_orig	142	143	NA	3.66422	2.06449	1.59178	3.39668	2.48139	3.66961	3.81439	3.70845	4.64888	2.41734	2.00807	5.15685	5.54118	0	NA	NA	14.5523	7.90226
38	143	Nillson_orig	143	144	NA	0.048302	0.597064	2.3685	1.13588	0.181284	1.90529	0.550859	1.16992	1.88998	2.82002	0.389758	2.9392	1.67712	0	-3300.59	-7809.23	-3.64076	-6.33593
41	144	Nillson_orig	144	145	NA	1.518	0.58489	2.66438	1.17644	0.586435	4.72259	2.07382	2.69613	3.05725	5.33278	3.52051	6.20311	3.72909	0	25070.2	-19756.9	-0.679458	7.79676
65	145	Nillson_orig	145	146	NA	0.611763	0.89312	1.96956	2.00986	0.617183	2.21926	3.224	4.025	4.16703	2.85864	1.59773	4.95557	2.61874	0	-23544.2	-3628.66	-6.07169	-1.77634
50	146	Nillson_orig	146	147	NA	3.19885	2.37458	1.31538	2.00529	2.59387	3.03405	3.70967	4.00936	4.62911	2.50063	2.53861	4.5843	4.71399	0	NA	NA	13.192	7.50601
55	147	Nillson_orig	147	148	NA	3.39644	2.3308	1.61636	3.10233	2.53912	3.24749	3.73534	4.42207	4.50399	2.78795	2.61628	4.58215	5.08553	0	NA	NA	14.5523	7.90226
50	148	Nillson_orig	148	149	NA	2.84132	2.8195	-0.146282	2.25397	2.69588	2.49544	3.90969	3.90646	5.63825	2.44344	2.38745	4.22419	3.9011	0	NA	NA	13.192	7.50601
50	149	Nillson_orig	149	150	NA	2.93048	1.71306	0.479856	1.71971	2.13044	2.55992	3.59468	3.63517	4.2255	2.67643	2.27431	4.64171	4.38854	0	NA	NA	13.192	7.50601
48	150	Nillson_orig	150	151	NA	0.78183	0.919479	3.33392	0.879501	1.25269	1.72456	2.10975	3.00551	5.14733	2.55527	0.726077	3.98403	2.29595	0	-19016.3	9848.97	-2.67048	-5.73589
55	151	Nillson_orig	151	152	NA	3.40792	1.47908	1.81064	3.10973	1.97795	3.20378	3.15876	3.73072	3.66408	2.42959	2.58061	4.19044	5.12324	0	NA	NA	14.5523	7.90226
58	152	Nillson_orig	152	153	NA	0.832009	0.715653	1.86243	0.577544	1.26571	1.56642	1.7833	3.2185	4.14303	2.45372	0.422507	3.07712	2.00494	0	-18811.1	7874.63	-3.38445	-5.0793
48	153	Nillson_orig	153	154	NA	0.837386	0.85018	4.20956	0.82708	1.13676	1.54384	1.92857	2.89506	5.05981	2.15828	0.923096	4.20867	3.04966	0	NA	NA	-2.67048	-5.73589
50	154	Nillson_orig	154	155	NA	3.31892	2.3727	1.78414	3.10479	2.70706	3.10412	3.72756	4.23505	4.35783	2.19665	2.06834	4.04113	4.85097	0	NA	NA	13.192	7.50601
50	155	Nillson_orig	155	156	NA	2.59883	2.12968	0.989943	1.39472	2.35682	2.39432	3.40158	4.18549	3.37548	2.8351	2.98694	4.02133	3.49518	0	NA	NA	13.192	7.50601
50	156	Nillson_orig	156	157	NA	2.32662	2.2384	1.13697	1.54898	2.55477	2.02408	3.91713	3.93421	4.55271	2.56935	2.62951	4.83164	3.17963	0	NA	NA	13.192	7.50601
50	157	Nillson_orig	157	158	NA	2.78958	2.64281	1.32108	1.9961	2.7025	2.78021	3.86577	4.10557	4.48995	2.9079	2.94572	4.75384	3.93253	0	NA	NA	13.192	7.50601
41	158	Nillson_orig	158	159	NA	1.0779	0.197264	1.49009	0.280682	0.125312	3.84519	1.33725	3.01108	2.10761	4.77346	3.31443	5.23172	2.84906	0	23387.9	-17288.3	-0.679458	7.79676
55	159	Nillson_orig	159	160	NA	3.37192	1.77403	1.4425	2.30151	2.09032	3.29955	3.29084	4.10287	3.67307	2.80728	2.88606	4.75978	4.97907	0	NA	NA	14.5523	7.90226
55	160	Nillson_orig	160	161	NA	3.15816	2.42947	2.15461	3.71523	2.59132	2.93542	3.79726	3.88973	4.65086	2.52664	2.56489	4.4529	4.62275	0	NA	NA	14.5523	7.90226
50	161	Nillson_orig	161	162	NA	2.80297	3.00914	0.601734	1.62779	2.96913	2.66349	4.09635	4.06794	4.42693	2.83885	2.01775	4.4134	4.17708	0	NA	NA	13.192	7.50601
50	162	Nillson_orig	162	163	NA	3.05816	2.6061	1.04212	2.06394	2.79341	2.89727	3.76931	3.92287	4.31249	2.85864	2.42579	4.41574	4.36896	0	NA	NA	13.192	7.50601
[truncated: 43,977 more rows]
