# Supplementary material for: Identification of Stem Cells from Large Cell Populations with Topological Scoring
Source: bioRxiv preprint, doi:10.1101/2020.04.08.032102, version 1 (2020-04-09)
Supplement: Supplemental Table 4 [file 032102_file05.xlsx]

## Sheet: out_tsne_Tops
Supplemental Table 4. t-SNE clustering output using TopS values
	CD10:CD10	CD110:CD110	CD11b:CD11b	CD123:CD123	CD19:CD19	CD3:CD3	CD34:CD34	CD38:CD38	CD4:CD4	CD45:CD45	CD45RA:CD45RA	CD49fpur:CD49fpur	CD90bio:CD90bio	clusterNum	tsne1	tsne2	label:label	ROW_NAMES
1	-1.05475	-0.329501	0.464376	0.502788	-0.611255	-0.117441	0.400635	0.331677	0.150161	0.304115	-0.0417981	0.682447	-0.280441	14	58.5581	20.739	0	C0
2	-0.48684	0.0130356	-0.103877	-0.672807	0.527615	0.390219	-0.200908	0.456854	-0.826592	0.965883	0.963736	0.0773391	-0.722877	4	-10.67	58.6655	0	C1
3	1.96813	-0.252162	-0.265308	0.304188	0.210713	-0.141711	-0.119528	0.353365	-0.455506	-1.02461	-0.218769	-0.757923	0.916331	28	-33.4699	-66.2021	0	C2
4	-0.757278	-0.264955	2.18094	-0.177084	-0.253694	-0.293371	-0.122777	0.162993	1.19401	-0.135886	-1.15658	0.324076	0.00798342	35	21.7742	-69.698	0	C3
5	1.4776	0.178899	-0.756299	-0.12757	0.603401	-0.358275	0.22375	0.0668375	-0.267407	-0.828544	-0.0608311	-0.365025	0.590707	11	1.64584	-50.8712	0	C4
6	2.11825	-0.147901	-0.607489	0.293252	0.137883	-0.0177413	-0.0191542	-0.123005	-0.0240081	-1.08699	-0.613886	-0.287589	0.93058	27	-15.3404	-69.9507	0	C5
7	-0.921191	0.221253	1.41844	1.17202	-0.933429	0.0979467	-0.587643	0.384211	-0.271126	0.677105	-0.670141	0.216828	0.00292095	3	-51.8772	9.91886	0	C6
8	-1.24829	0.138414	1.93739	-0.096549	-0.369837	-0.416471	-0.0722225	0.266703	1.68777	-0.00416358	-0.975749	0.267907	-0.275959	23	27.4001	-67.4274	0	C7
9	1.95928	-0.595405	-0.648863	0.206329	-0.0521961	-0.198636	-0.0292002	0.429635	-0.314798	-0.707869	0.0785996	-0.42081	0.756887	28	-39.7095	-51.1298	0	C8
10	1.23262	-0.0807129	-0.709925	0.111005	0.381535	-0.553082	0.195089	0.672165	-0.0735026	-0.748112	-0.214404	-0.253407	0.355734	15	-12.2274	-32.9415	0	C9
11	-0.833188	-0.961061	0.765412	1.35897	-1.21046	-0.262804	0.0544387	0.985987	0.0927959	0.391313	0.443434	0.326098	-0.354002	14	46.8902	30.484	0	C10
12	1.37487	-0.0928627	-0.593631	0.0666026	0.291801	-0.264602	0.22312	0.550695	-0.118298	-0.915508	-0.39237	-0.249494	0.433299	2	-7.42395	-41.5668	0	C11
13	0.81382	0.305663	-0.395583	-0.440358	0.781876	-0.652502	0.326236	0.62247	-0.163105	-0.619119	0.139949	-0.338995	-0.0984358	31	-12.4181	1.70323	0	C12
14	-1.22582	-0.278728	3.57395	-0.0251092	-0.520947	-0.396696	-0.204679	-1.3554	1.37957	-0.168189	-0.925938	0.937295	0.642681	35	6.90782	-87.0729	0	C13
15	-1.10385	0.494265	0.149746	0.739512	0.999185	0.258401	0.0293532	-1.15137	-0.587785	0.610106	1.39123	-0.183835	-0.920339	1	-4.11493	71.8915	0	C14
16	0.564771	0.953747	-0.502604	-0.269699	1.48195	-0.639668	0.774189	-0.042134	0.318359	-0.807449	-0.877374	-0.296494	-0.122865	19	27.6373	17.9607	0	C15
17	1.59025	0.0482567	-0.689253	0.222842	0.740494	-0.370873	0.134694	0.125089	-0.268534	-0.784233	-0.124032	-0.736081	0.525126	11	4.31976	-47.5183	0	C16
18	-1.25979	-0.363383	3.42316	-0.339452	-0.171863	-0.616884	-0.135918	-0.618978	1.5648	-0.753403	-0.75262	0.766677	0.550378	35	7.55793	-84.8479	0	C17
19	-1.41991	0.236664	1.29534	0.143989	-0.224071	-0.26793	-0.222703	1.13333	1.8655	-0.0140385	-1.09037	0.244573	-0.60903	23	36.3138	-63.8356	0	C18
20	1.23145	0.0744236	-0.550897	-0.126451	0.683137	-0.493863	0.204063	0.826883	-0.145172	-0.811248	-0.176028	-0.462371	0.0765445	26	2.32508	-23.4234	0	C19
21	-0.152509	0.146476	-0.0320002	-0.80754	-1.18074	2.33975	-1.15281	0.250243	-0.835412	2.34795	-1.03262	1.01339	0.510705	36	-66.9669	40.8736	0	C20
22	-1.00058	1.01467	-0.718639	-0.112153	1.48688	0.480963	0.503468	-2.0963	-0.0889111	1.0237	1.21144	0.163782	-0.777782	7	15.1031	79.938	0	C21
23	1.60764	-0.196434	-0.395031	0.0694416	0.36877	-0.326322	-0.201541	0.679873	-0.531872	-0.850807	0.565209	-0.796085	0.436262	18	-40.6537	-26.9411	0	C22
24	0.968202	-0.103203	-0.642302	0.356129	0.339786	-0.461091	0.0953354	0.65621	-0.0852012	-0.958369	0.49238	-0.347573	0.0054133	21	-30.8881	-1.72476	0	C23
25	1.01113	0.432427	-0.559373	0.40274	0.91039	-0.509693	0.234663	0.64663	-0.0521178	-1.1011	-0.302614	-0.679075	0.00592007	34	16.182	-28.74	0	C24
26	0.800978	0.232411	1.48891	0.624394	-0.695106	0.298023	-0.837182	-0.745603	-0.6167	0.614257	-0.381058	0.076948	-0.0538406	3	-53.8625	-10.9565	0	C25
27	-1.05578	-0.698258	0.62851	0.425357	-1.17077	0.44403	0.403317	0.834458	0.47877	0.647055	-1.02145	0.450507	0.494132	38	75.4034	-4.53024	0	C26
28	-0.83312	0.591789	-0.437788	-0.738301	1.10721	0.755269	0.222182	-2.45227	-0.118559	1.34129	2.58335	0.329108	-0.49065	10	25.2606	68.0671	0	C27
29	-1.19011	-0.270109	1.82583	-0.344835	-0.615556	0.608891	-0.393467	-0.470496	1.3008	1.25135	-0.95292	0.580716	-0.432155	17	-65.0417	-14.3727	0	C28
30	1.29324	-0.0597243	-0.640502	0.107393	0.465334	-0.411339	0.264265	0.225784	0.0782005	-1.11148	-0.0258357	-0.285567	0.453961	15	-16.4608	-29.686	0	C29
31	0.476262	0.277639	-0.7254	-0.529291	0.592695	-0.44543	0.488054	0.491936	-0.08401	-0.468033	0.374761	-0.0798756	-0.107455	21	-16.8676	10.3556	0	C30
32	-0.979073	0.0497148	1.97745	0.8846	-0.905725	0.0368933	-0.827727	0.134939	0.130711	0.872683	-0.480271	0.230155	-0.191002	3	-49.2852	6.95403	0	C31
33	1.451	-0.388578	-0.688652	-0.00433245	-0.104696	-0.155411	-0.34341	0.940919	-0.64492	-0.338859	0.745935	-0.587557	0.560362	18	-43.0933	-26.4469	0	C32
34	0.818614	0.150305	-0.833569	-0.367836	0.685811	-0.486737	0.299752	0.19648	0.137801	-0.556375	0.429882	-0.194323	0.0109754	31	-19.388	-1.51688	0	C33
35	1.11161	0.597523	-0.770545	-0.0648524	1.20119	-0.626263	0.339907	0.595243	-0.178784	-0.678424	-0.229617	-0.654448	-0.160601	33	26.7219	-4.4783	0	C34
36	-0.123816	0.466238	0.07961	-0.756821	-0.943034	2.308	-1.06832	-1.11217	0.6989	1.62686	-1.05112	0.63037	0.439434	6	-60.9337	20.7842	0	C35
37	0.9829	0.23347	-0.0756533	0.20067	0.653277	-0.579517	0.189655	0.707752	-0.199451	-1.02081	-0.296071	-0.42691	-0.0642358	15	2.3553	-26.5426	0	C36
38	1.3666	0.476188	-0.78212	0.429886	0.944105	-0.416516	0.442742	-0.148158	-0.10318	-1.0498	-0.504166	-0.412807	0.259219	34	21.3774	-37.2438	0	C37
39	-1.25113	-0.497103	3.28345	-0.333316	-0.386758	-0.635194	-0.182156	0.125982	1.49095	-0.512626	-0.827461	0.610332	0.30901	35	14.6172	-79.8415	0	C38
40	0.590005	0.250343	-0.203036	0.208665	0.801008	-0.515506	0.287417	0.301751	0.00226255	-0.672492	-0.54641	-0.10569	-0.171032	33	18.3269	-9.88226	0	C39
41	-0.771115	-0.616548	2.30922	-0.18316	-1.26163	1.06958	-1.2633	-0.531741	0.412535	1.61498	-0.422297	0.556418	0.36286	17	-72.1113	-13.5415	0	C40
42	-1.15206	0.82361	0.0676067	-0.476521	1.33893	-0.726223	0.666036	3.40751	-0.222465	-0.2098	-0.650272	-0.58653	-1.03748	13	52.7216	-44.0852	0	C41
43	1.08664	0.403301	-0.353974	0.00459452	0.732229	-0.338055	0.0962385	-0.12506	-0.100275	-0.778166	-0.0817056	-0.463888	0.138826	24	20.4985	-26.3909	0	C42
44	1.07618	0.139489	-0.436234	-0.165259	0.499381	-0.365061	-0.0227558	0.655409	-0.297506	-0.731352	0.238125	-0.532018	0.188369	37	-27.4451	-17.9129	0	C43
45	0.912214	0.232085	-0.342318	-0.0222793	0.794806	-0.589813	0.180782	0.496786	-0.29858	-0.570501	-0.208253	-0.340727	0.00164546	26	8.94266	-16.3767	0	C44
46	0.848681	-0.467559	-0.220794	0.145361	0.0798002	-0.608449	0.275078	1.20153	-0.0770436	-0.904399	0.228796	-0.131491	-0.0478887	37	-38.4761	-14.7615	0	C45
47	-0.970936	-0.536764	0.205403	0.500084	-0.933208	0.655377	0.433898	-1.21477	0.623479	1.28225	-0.568804	0.82005	0.535915	25	92.5218	21.7645	0	C46
48	-0.953453	0.122616	-0.139783	-0.0671827	0.704051	0.867845	-0.149731	-1.63598	-0.496344	1.53027	1.41701	0.100159	-0.468631	7	13.4049	66.3088	0	C47
49	1.56697	-0.266802	-0.0122385	0.365647	0.288929	-0.301389	0.0602362	-0.502795	-0.105124	-1.05077	0.0984708	-0.35155	0.54055	2	-14.7745	-43.1179	0	C48
50	-1.21113	0.465035	0.204274	0.881133	0.922708	0.357845	0.0272105	-1.40993	-0.311271	0.844557	1.21601	-0.0677859	-1.1542	1	-3.0891	78.9244	0	C49
51	-0.388728	-0.818291	0.34638	0.623749	-1.09917	-0.121805	0.296889	0.670219	-0.187854	0.326256	0.839206	0.221738	-0.26031	14	52.0715	35.0086	0	C50
52	1.14843	0.204874	-0.299484	-0.0236814	0.65885	-0.341881	0.0402202	0.55142	-0.21303	-0.915708	0.288399	-0.813836	0.0457872	37	-24.2375	-19.9232	0	C51
53	1.82244	-0.0656625	-0.745801	0.0424134	0.519605	-0.102282	-0.152288	1.07588	-0.395021	-0.700212	-0.836065	-0.529154	0.65374	27	-15.6124	-64.5927	0	C52
54	1.00338	0.0868871	-0.476285	-0.0591783	0.585645	-0.356121	0.1037	0.678187	-0.0942526	-0.592952	-0.224383	-0.466156	0.0395397	26	4.39131	-22.4372	0	C53
55	0.191476	0.944052	-0.376362	-0.37566	1.36377	-0.576044	0.567367	-0.0370513	0.159863	-0.619971	0.0456422	-0.535845	-0.410672	20	15.0024	26.0258	0	C54
56	0.906872	0.818936	-0.773241	0.200325	1.30597	-0.517744	0.596695	-0.199548	0.139867	-0.900381	-0.452022	-0.70075	0.0823358	24	30.5824	-19.7815	0	C55
57	1.57648	0.0265913	-0.745877	0.0801819	0.526049	-0.143492	0.110563	0.31001	-0.165735	-0.833272	-0.506344	-0.357713	0.515078	11	-3.8162	-49.9408	0	C56
58	1.309	-0.454866	-0.00125732	0.837017	-0.183525	-0.552772	0.11827	0.928031	-0.22485	-1.08672	-0.331932	-0.185951	0.277476	2	-13.2462	-52.2096	0	C57
59	0.930637	-0.301605	-0.452288	-0.438182	0.0676488	-0.398658	0.0890902	0.912809	-0.0654613	-0.491486	0.622169	-0.236977	0.0172979	37	-38.8906	-9.59887	0	C58
60	0.961852	0.519821	-0.474747	0.216279	1.12847	-0.67547	0.443578	-0.353764	0.0604521	-0.905955	-0.245664	-0.354831	0.0575356	24	27.5744	-20.6368	0	C59
61	-0.421401	-0.237053	2.16587	0.332532	-0.57243	0.000392	-0.0271269	-0.51685	0.682607	0.0486576	-1.00278	0.217248	0.0814277	17	-61.38	-11.9756	0	C60
62	-0.382919	0.338895	0.543655	-0.636644	-0.661703	2.05966	-0.775714	-1.85105	1.13531	2.07178	-1.40269	0.897687	0.427364	6	-68.2875	21.2415	0	C61
63	0.940746	0.367916	-0.580621	0.0655962	0.852242	-0.508487	0.349402	0.354146	-0.0979251	-0.812887	-0.342456	-0.350698	0.0528893	26	14.3906	-15.6783	0	C62
64	-0.677735	0.224443	-0.676986	-0.174794	0.547611	0.519736	-0.262545	-0.731416	-0.62446	1.15048	1.6047	0.108417	-0.488794	1	1.67795	62.7785	0	C63
65	1.51975	0.0861704	-0.423203	-0.131301	0.704161	-0.165921	0.134442	0.49767	-0.290523	-0.754151	-0.533873	-0.66038	0.397857	11	0.684402	-42.9197	0	C64
66	0.84301	0.225125	-0.480595	0.351368	0.747233	-0.575971	0.0812997	0.679986	-0.187844	-0.841687	-0.0861066	-0.371959	-0.101652	15	0.858049	-24.8773	0	C65
67	-1.10583	-0.30219	2.19992	-0.00637306	-0.211587	-0.522471	0.102927	0.67793	1.29168	-0.232728	-0.872261	0.178302	-0.28866	23	22.8213	-67.245	0	C66
68	-1.23799	-0.485593	0.627604	0.682974	-0.808811	0.250432	0.482802	0.808919	0.419103	0.890474	-1.1208	0.682598	-0.345394	38	66.2051	-2.26833	0	C67
69	1.20412	0.299265	-0.567954	0.00208677	0.534041	-0.4435	0.238724	0.182391	0.0405819	-0.909594	-0.265225	-0.275126	0.244476	34	8.34317	-33.3439	0	C68
70	0.0334194	0.15892	-0.118916	-0.624137	-1.01386	2.51521	-1.02338	-1.63565	0.297513	2.70841	-1.32783	1.27938	0.701268	6	-66.4014	29.2601	0	C69
71	1.22668	0.306208	-0.245061	0.417043	0.818984	-0.528909	0.144125	0.254835	-0.39965	-0.974155	0.144282	-0.93066	0.173906	15	-2.22996	-26.442	0	C70
72	1.63077	0.209689	-0.734611	0.00824828	0.773747	-0.239887	0.245887	0.247978	-0.117208	-0.898738	-0.46459	-0.64583	0.4444	34	6.93041	-42.6095	0	C71
73	-1.14424	-0.373233	1.89567	0.113073	-0.321097	-0.601676	0.598157	-0.0256121	1.40684	-0.394701	-1.29909	1.1352	0.106112	35	13.7828	-72.0202	0	C72
74	1.27462	0.345414	-0.684608	0.120326	0.863614	-0.456617	0.2886	0.511389	-0.281121	-0.9264	-0.174758	-0.719347	0.259503	26	8.32947	-23.2777	0	C73
75	0.559837	0.554411	-0.639551	-0.411799	1.03705	-0.692437	0.586389	0.642063	0.161359	-0.736807	-0.16475	-0.238974	-0.273348	12	7.92578	13.7096	0	C74
76	0.0780001	-0.653726	0.257201	1.60832	-0.916474	-0.152981	-0.131076	0.265865	-0.249255	0.183994	0.253176	-0.0460085	-0.0827047	14	54.5984	34.4765	0	C75
77	1.06698	0.157469	-0.610629	-0.171029	0.461023	-0.295456	0.204028	0.00849842	-0.0639349	-0.676156	0.145886	-0.247984	0.218119	31	-8.79375	-14.8873	0	C76
78	-1.47051	-0.587798	0.431817	0.797184	-0.821033	-0.278853	0.987459	-0.275452	0.783458	0.0889621	0.269409	0.958896	-0.212852	14	62.1715	22.2055	0	C77
79	-0.413929	-0.835909	0.371812	1.56192	-1.10277	-0.131063	0.0539159	0.0627275	-0.132433	0.216003	0.873401	0.208138	-0.168734	14	54.9992	34.0045	0	C78
80	1.60571	-0.148285	-0.835221	0.0236161	0.352408	-0.185209	-0.0187087	0.395634	-0.394765	-0.762833	0.160437	-0.322381	0.503942	18	-25.2883	-35.4104	0	C79
81	1.3459	-0.134839	-0.759066	-0.318382	0.066871	-0.220237	0.197894	0.121109	-0.125551	-0.439994	0.250043	-0.101909	0.387079	18	-33.5447	-35.1287	0	C80
82	1.04377	0.268	-0.566493	-0.334389	0.845129	-0.463569	0.329259	-0.0452264	-0.0119172	-0.836057	0.124117	-0.164877	0.108114	12	6.26355	-2.63548	0	C81
83	-0.962492	0.284694	1.4197	0.984199	-0.697742	0.132099	-0.743379	0.408748	0.194164	0.667041	-0.436218	0.175094	-0.656401	3	-46.039	6.44205	0	C82
84	-0.978994	-0.151115	1.40224	0.0184648	-0.655929	0.0881029	-0.542718	1.41745	1.20516	0.420561	-1.17555	0.293886	-0.450444	23	34.2128	-59.2949	0	C83
85	-0.636101	-0.148934	1.85699	-0.0337548	-0.340268	-0.548941	-0.425239	0.697007	1.07204	0.113235	-0.634261	0.127331	-0.463577	23	24.6557	-60.8837	0	C84
86	1.95983	-0.501879	-0.667411	0.319346	0.0476288	-0.108532	0.027668	0.174746	-0.323643	-0.953615	0.0106926	-0.368132	0.859661	28	-38.6564	-51.6018	0	C85
87	1.58074	-0.232113	-0.469915	-0.0529468	0.117258	-0.0676019	-0.133407	0.511565	-0.19282	-0.773457	0.0865746	-0.570384	0.528571	18	-40.9486	-36.5495	0	C86
88	0.89557	0.400604	-0.695136	-0.123781	0.895103	-0.589792	0.375151	0.141504	0.0501801	-0.832595	0.113778	-0.324616	0.00993618	26	7.03143	-5.879	0	C87
89	1.68085	-0.0819507	-0.504431	0.244639	0.371181	-0.182126	0.0200195	0.692508	-0.298268	-0.95521	-0.513702	-0.567317	0.529939	27	-14.539	-63.3068	0	C88
90	-1.28997	-0.315346	1.05146	-0.387487	-0.397082	-0.574298	0.111037	3.09962	1.23185	-0.163155	-0.877196	0.227551	-0.575571	13	50.5467	-42.462	0	C89
91	1.47114	0.461091	-0.74247	0.101757	0.792188	-0.320734	0.144998	0.320201	-0.293359	-0.918954	-0.362226	-0.526685	0.293827	34	6.76523	-43.4003	0	C90
92	-1.00419	0.669219	0.12207	-0.603808	1.12038	0.614851	0.111747	-2.16552	-0.300144	1.08767	2.3226	0.0913498	-0.772532	10	23.3938	66.822	0	C91
93	1.4994	-0.180351	-0.180868	0.785789	0.205796	-0.581993	0.089033	0.572879	-0.325835	-1.00373	-0.526114	-0.341973	0.413506	2	-12.2695	-52.3248	0	C92
94	0.322506	0.50639	-0.440477	0.0877548	0.919484	-0.189969	0.0809675	0.0471754	-0.323519	-0.00494425	0.26094	-0.607551	-0.478311	4	-7.67958	42.4337	0	C93
95	1.57171	-0.353802	-0.571543	0.198933	-0.0793464	-0.251638	-0.594487	0.672019	-0.586644	-0.285261	0.980895	-0.78042	0.581864	28	-40.6245	-58.1344	0	C94
96	0.985501	0.757363	-0.755983	-0.298811	1.24283	-0.465762	0.429765	-0.170279	0.0644153	-0.782439	-0.0439802	-0.573276	0.0511461	33	21.6741	6.64335	0	C95
97	-0.752689	-0.604937	0.419096	-0.200809	-1.06059	0.487665	0.527617	-0.341397	0.459278	0.979983	-0.910763	0.762708	0.929574	25	89.4644	7.87981	1	C96
98	0.308092	0.434732	-0.497232	-0.0545134	0.869218	-0.965043	0.477472	0.83636	-0.0957734	-0.759913	0.448961	-0.257427	-0.375876	9	-7.3848	13.7427	0	C97
99	-0.388213	-0.97746	0.147137	0.604055	-1.04113	-0.137916	0.258887	0.759112	0.289292	0.289691	0.489752	0.493517	-0.333811	14	51.9966	35.2145	0	C98
100	1.61266	-0.292359	-0.461857	0.170617	0.303667	-0.337603	-0.0685797	0.450102	-0.370403	-0.773902	0.202048	-0.596084	0.526228	18	-40.7232	-34.7373	0	C99
101	0.803983	1.03293	-0.560342	-0.24692	1.4705	-0.668582	0.645543	0.299424	0.119602	-0.869698	-0.959468	-0.444881	-0.0678099	19	29.3536	13.3956	0	C100
102	1.31149	-0.156416	-0.474005	0.0983263	0.379977	-0.326023	0.224324	0.157252	-0.0913493	-0.813242	-0.033654	-0.24968	0.210531	15	-18.2261	-26.5655	0	C101
103	0.442549	0.252193	-0.766756	-0.175912	0.824294	-0.533706	0.593289	0.647581	-0.142469	-0.595875	0.198898	-0.32231	-0.116429	9	-11.3942	13.7065	0	C102
104	-0.653252	-0.198333	0.938683	-0.850138	-1.27788	1.63413	-1.3929	-1.27536	0.521698	1.39061	1.92752	0.397069	0.321228	5	-43.2667	30.3776	0	C103
105	0.30414	0.728945	-0.191906	-0.383023	1.05136	-0.557159	0.427879	0.0974748	0.217576	-0.757207	-0.0234706	-0.364167	-0.281102	9	-0.119605	22.2331	0	C104
106	-0.215792	0.112823	0.46032	-0.585785	-1.16834	2.22127	-1.0615	-1.84286	-0.569913	2.26701	0.644736	1.06202	0.344138	36	-48.0183	44.3554	0	C105
107	1.37938	-0.102537	-0.237818	0.374834	0.341487	-0.501137	0.103211	0.536717	0.0178457	-0.950367	-0.60856	-0.370209	0.357136	27	-6.45258	-62.0681	0	C106
108	1.52571	-0.679577	-0.244069	0.791593	-0.292832	-0.179376	-0.305519	0.293832	-0.578067	-0.665979	0.885545	-0.591447	0.525361	28	-39.3661	-58.33	0	C107
109	-0.908253	0.204289	1.75357	0.814997	-0.648951	0.192288	-0.458482	-0.334769	-0.21692	0.81514	-0.667882	0.392863	-0.176586	3	-52.4722	-3.64336	0	C108
110	1.23493	-0.159504	-0.586683	-0.248303	0.426444	-0.361552	0.355772	0.442607	-0.203352	-0.892559	0.0758739	-0.126592	0.346053	15	-18.6392	-21.9945	0	C109
111	-0.648731	0.0280522	2.21071	0.304202	-0.882509	0.386754	-0.530462	-0.442773	0.0656183	0.815223	-0.815968	0.491473	-0.121793	3	-63.212	0.0331936	0	C110
112	1.55797	0.266532	-0.762679	0.0754616	0.430451	-0.383823	0.251988	0.00166769	-0.249504	-0.963543	0.0909051	-0.439205	0.540306	11	0.757851	-50.8599	0	C111
113	1.07899	0.1528	-0.772951	-0.131099	0.559948	-0.505977	0.25874	0.139581	-0.111533	-0.623739	0.382805	-0.291496	0.137085	31	-19.2789	-4.89065	0	C112
114	1.10327	0.322816	-0.463975	0.239684	0.892815	-0.548942	0.169728	0.0918919	-0.246556	-0.853885	-0.0186804	-0.558608	0.185701	24	19.805	-20.3252	0	C113
115	-0.693963	-0.717882	0.848641	-0.515552	-1.55119	1.66802	-1.14786	-1.77086	-0.10209	2.4142	2.43783	1.13281	0.30126	32	-40.1514	58.5862	0	C114
116	-0.0601648	0.623159	-0.854093	-0.335678	1.13658	-0.770057	0.68275	0.400637	0.305152	-0.502174	0.439256	-0.0167727	-0.606898	9	-6.40195	30.8597	0	C115
117	-1.09965	0.745985	-0.17842	0.747889	1.36901	0.270866	0.309796	-1.96777	-0.235808	0.773317	1.40006	-0.0959937	-1.01578	1	0.289167	79.5077	0	C116
118	0.909875	-0.473884	-0.51686	-0.125135	-0.0795937	-0.427296	0.350987	0.286924	0.204293	-0.603392	0.34716	0.00930897	0.329812	18	-35.6359	-35.7839	0	C117
119	-0.230034	0.524008	-0.0826327	-0.357329	1.13986	-0.389209	0.292102	0.911192	-0.346029	-0.0806604	0.196942	-0.545639	-0.736414	9	-3.86315	34.1767	0	C118
120	1.6665	-0.232289	-0.744219	0.183498	0.323465	-0.180852	0.180924	0.00918774	-0.0349537	-0.941769	-0.215526	-0.20388	0.562548	11	-4.90804	-52.5	0	C119
121	-1.19922	-0.809126	0.233704	0.23131	-1.04906	-0.0129594	0.710902	1.13619	0.555107	0.428233	-0.0495479	0.720567	-0.194343	22	50.7407	11.2187	0	C120
122	-1.07761	0.317112	1.99131	0.936363	-0.88289	0.363509	-0.734127	0.0493749	-0.331228	0.909581	-0.473017	0.273001	-0.361916	3	-57.1457	7.75391	0	C121
123	1.14057	-0.232164	-0.443151	-0.0442748	0.304265	-0.529571	0.29488	1.01285	0.0104422	-0.803964	-0.61922	-0.100101	0.333176	15	-12.0905	-36.0045	0	C122
124	1.29633	0.281895	-0.660795	-0.200502	0.718675	-0.452901	0.303077	0.0879637	0.0340614	-0.789006	-0.190314	-0.293325	0.18256	26	7.89481	-11.7465	0	C123
125	-1.17424	0.612911	1.93679	0.91578	-1.05561	0.149725	-0.959285	0.522161	0.187871	0.523099	-0.667929	0.25662	-0.159562	3	-47.3587	8.97949	0	C124
126	-0.400172	-0.0622765	2.29201	-0.120303	-0.285475	-0.411052	-0.509566	0.495325	1.56107	-0.344221	-0.472096	-0.0818676	-0.808212	23	23.5614	-62.2014	0	C125
127	1.59923	-0.139237	-0.529007	0.610997	0.145004	-0.232016	-0.167625	0.513358	-0.12468	-0.961302	-0.180891	-0.673023	0.552782	27	-16.6688	-59.5268	0	C126
128	0.270756	1.05484	-0.35277	-0.371484	1.2992	-0.535477	0.479538	-0.116994	0.12057	-0.636822	0.11573	-0.577476	-0.423123	20	14.8888	25.8068	0	C127
129	1.61563	-0.0323154	-0.306514	0.211307	0.546346	-0.114616	0.137178	0.00431552	-0.357954	-0.890407	-0.496895	-0.479423	0.50339	11	-3.43962	-57.9629	0	C128
130	2.19255	-0.32759	-0.406906	0.655603	-0.00439778	0.106464	-0.397293	0.329098	-0.906361	-0.823207	-0.0709854	-0.699539	0.986837	28	-37.8327	-66.2697	0	C129
131	-0.900916	-0.648781	1.56285	0.0748456	-0.978351	1.0689	-0.697975	-0.0693116	0.406197	1.66284	-1.22078	0.73974	0.0299567	17	-70.8931	-21.2717	0	C130
132	1.61771	-0.578373	-0.52761	0.0253702	0.0203567	-0.245011	0.199154	0.904029	-0.0966213	-1.0516	-0.245701	-0.131656	0.56944	18	-33.7468	-41.8533	0	C131
133	-0.571289	-0.154298	-0.355172	0.0864994	0.112637	0.589391	-0.694637	0.244773	-1.01059	1.0841	1.87753	0.0180221	-0.70435	4	-13.8652	59.5885	0	C132
134	-0.784248	-0.832102	0.34402	-0.669551	-1.38868	1.54994	-1.19039	0.708407	-0.835683	2.13241	1.29168	0.860786	0.343303	32	-21.572	65.9961	0	C133
135	-0.15031	0.119674	0.64845	-0.882364	-1.40126	2.34835	-1.5306	-2.16765	-1.065	2.2994	3.07354	0.989835	0.664145	30	-32.3018	44.3753	0	C134
136	-0.698808	-0.204473	1.24296	0.835274	0.0552259	-0.0461883	-0.55512	-0.116946	-0.148766	0.268828	0.466575	-0.152691	-0.649666	4	2.24531	54.7404	0	C135
137	1.36377	0.229752	-0.44068	0.321343	0.657002	-0.406025	0.230243	0.362273	-0.268019	-0.971183	-0.464274	-0.633795	0.427064	11	11.1051	-49.9297	0	C136
138	-0.809877	0.0826576	-0.172511	0.545671	0.204704	-0.249984	0.154204	-0.815649	0.103997	0.167201	1.02916	0.542949	-0.533854	4	-0.309015	56.2052	0	C137
139	-0.357469	0.144135	0.243661	-0.788004	-1.18858	1.99514	-1.40762	-1.07778	0.0580638	1.50111	1.5676	0.30919	0.288189	5	-46.1517	25.7616	0	C138
140	1.66259	-0.089318	-0.200498	0.789345	0.285122	-0.370159	-0.0961571	-0.0139032	-0.549454	-1.01635	-0.205056	-0.474701	0.708514	27	-22.4282	-63.5249	0	C139
141	1.33481	0.135667	-0.519336	-0.147569	0.569328	-0.453324	0.257938	0.0980348	0.0165946	-0.938068	-0.07677	-0.326104	0.356903	15	0.64564	-31.4376	0	C140
142	1.2284	0.188495	-0.413398	-0.228265	0.611704	-0.582691	0.244308	-0.142421	-0.118917	-0.788829	0.144681	-0.0923879	0.212255	15	-10.0196	-23.5725	0	C141
143	2.01044	-0.253024	-0.502986	0.591093	0.252229	-0.0339698	0.0372818	-0.134836	-0.181641	-1.12052	-0.723379	-0.291702	0.896662	27	-19.4583	-66.2035	0	C142
144	-1.21544	0.159205	1.82755	0.719789	-0.793447	0.591593	-0.792822	-0.60112	0.0954005	1.28619	-0.629213	0.552279	-0.0163126	3	-59.5957	-2.20502	0	C143
145	-0.774386	-0.889704	0.67928	-0.360081	-1.46023	1.42603	-0.895464	-0.577075	-0.562549	2.0379	1.85659	0.84536	0.0641987	32	-32.8616	59.3891	0	C144
146	-1.44214	-0.390267	0.512129	0.477457	-1.12502	-0.148642	0.590329	1.62167	0.5436	0.151883	-0.24079	0.604004	-0.32996	22	44.8495	9.44084	0	C145
147	1.34752	0.11254	-0.572974	-0.190833	0.568086	-0.354965	0.0894673	0.395298	-0.0571169	-0.947682	0.00722975	-0.434472	0.365967	15	-5.45927	-30.4137	0	C146
148	1.46497	-0.069879	-0.514027	0.361124	0.294695	-0.36571	-0.0783369	0.675191	-0.304738	-0.903543	-0.0797172	-0.591982	0.469285	27	-13.5249	-55.4804	0	C147
149	0.885246	0.617522	-1.21911	0.0521502	0.866336	-0.603219	0.4269	0.431798	0.73634	-0.878441	-0.0465478	-0.48822	-0.133301	33	12.6591	0.190282	0	C148
150	1.27046	-0.185402	-0.839469	-0.142419	0.216714	-0.410805	0.315382	0.328749	-0.00539089	-0.551157	-0.00223788	-0.128013	0.440911	15	-19.4951	-30.2117	0	C149
151	-1.09512	-0.214128	1.86079	-0.0894947	-0.214436	-0.306733	-0.259639	0.551175	1.50292	0.110591	-0.957408	0.291291	-0.356947	23	28.8434	-65.7134	0	C150
152	1.88776	-0.505735	-0.188882	0.607176	-0.185712	-0.133391	-0.299444	0.204844	-0.516609	-0.89719	0.177674	-0.512915	0.840117	28	-36.2379	-64.1685	0	C151
153	-0.813071	-0.180445	0.833429	-0.0891303	0.052739	-0.194101	-0.295488	1.18028	1.05298	0.290628	-1.0301	0.0687879	-0.319098	23	34.6395	-57.181	0	C152
154	-1.06864	-0.299912	2.64811	-0.151161	-0.40392	-0.462855	-0.460543	0.357865	1.38238	-0.259479	-0.807139	0.368116	0.165283	35	19.4639	-72.2663	0	C153
155	1.51048	0.0779216	-0.316525	0.474925	0.694835	-0.342025	0.063269	0.623393	-0.259788	-1.18052	-0.569078	-0.712154	0.432979	11	-6.41068	-59.7645	0	C154
156	0.686395	0.152139	-0.567903	-0.336007	0.539867	-0.526703	0.117969	1.0153	-0.515231	-0.438129	0.907837	-0.430903	-0.261269	21	-29.4492	12.0787	0	C155
157	0.214609	0.225015	-0.498395	-0.26519	0.814272	-0.778718	0.603698	0.657646	0.168244	-0.660103	0.405716	-0.0648487	-0.510419	9	-12.511	22.4881	0	C156
158	0.637067	0.341431	-0.572307	-0.199097	0.72808	-0.527855	0.236063	0.508663	-0.146146	-0.662672	0.513118	-0.358971	-0.242505	21	-21.6508	7.17383	0	C157
159	-0.858651	-0.810746	0.22299	-0.511604	-1.49232	1.23278	-1.00583	0.389236	-0.635461	2.12702	2.21888	0.848297	-0.0809002	32	-26.6495	66.1207	0	C158
160	1.70194	-0.34849	-0.478316	0.00954426	-0.119193	-0.143428	-0.268525	0.549676	-0.588458	-0.705454	0.472958	-0.325379	0.617856	28	-40.9406	-55.1544	0	C159
161	1.13162	0.06725	-0.128505	0.839512	0.443546	-0.51604	0.0529521	0.111875	-0.151883	-1.0238	-0.0727649	-0.591131	0.172367	2	-14.3362	-46.8717	0	C160
162	0.768745	0.756615	-0.906178	-0.348936	1.2525	-0.52906	0.568391	0.578479	-0.0976789	-0.632243	-0.509257	-0.437813	0.0336622	33	28.7588	0.73162	0	C161
163	1.14212	0.341461	-0.706129	-0.132249	0.911299	-0.418473	0.183535	0.332438	-0.217043	-0.664878	-0.0941367	-0.482537	0.12767	26	4.6916	-13.0228	0	C162
164	1.19038	-0.817458	0.104293	0.00188147	-1.34604	-0.0134388	-0.461847	1.65417	-0.433784	0.0463208	0.796134	-0.164293	0.180773	30	-25.8015	30.8281	0	C163
165	-0.526223	0.427078	-0.356093	-0.596994	0.716446	0.241051	-0.0155721	0.524969	-0.526989	0.82301	0.744682	-0.168549	-0.920616	4	-6.40461	57.7576	0	C164
166	1.10502	0.353348	-0.372867	-0.127752	1.02056	-0.472058	0.12283	1.0327	-0.345183	-0.868255	-0.390338	-0.800649	0.192917	26	2.74239	-22.4981	0	C165
167	-1.19303	0.0360086	1.3618	-0.36139	-0.3519	-0.133098	-0.455104	1.15156	1.91204	0.386531	-1.03817	0.262439	-0.627225	23	35.5858	-62.4519	0	C166
168	0.937271	0.332444	-0.807116	0.420971	0.707781	-0.521799	0.335786	0.533172	-0.0938306	-0.880242	-0.440316	-0.187825	0.0477563	24	14.273	-19.9217	0	C167
169	0.924593	-0.231611	-0.728836	-0.348853	0.208156	-0.272887	0.262369	0.310104	0.180969	-0.571838	0.346263	-0.0487971	0.198975	37	-31.7516	-9.33435	0	C168
170	-0.646781	0.199981	1.46155	0.365433	-0.970805	0.359772	-0.521095	-0.0384022	-0.043768	0.800369	-0.6052	0.378147	-0.105452	3	-51.1335	-0.434099	0	C169
171	0.638546	0.449824	-0.308909	-0.0868291	1.05217	-0.836587	0.581435	0.279476	0.0131427	-0.746882	-0.0643426	-0.383873	-0.256665	12	2.29493	8.41301	0	C170
172	1.03832	0.496934	-0.822957	0.0733828	0.960658	-0.613587	0.503336	0.377429	0.167607	-0.975867	-0.461682	-0.4537	0.17051	24	29.9521	-15.7059	0	C171
173	0.223413	0.255712	-0.345032	-0.53691	0.894701	-0.784017	0.862399	0.449908	0.597815	-0.606546	-0.585914	0.161253	-0.220165	12	2.2325	19.9038	0	C172
174	-1.20921	-0.497772	0.437868	0.0270411	-1.07793	0.217766	0.519293	1.85772	0.213309	0.792209	-0.712151	0.750272	-0.439686	8	52.7171	-5.71701	0	C173
175	-0.948612	0.487476	-0.281425	-0.540203	0.903342	0.642444	0.049519	-1.66239	-0.479655	1.29957	2.01487	0.217274	-0.667984	7	17.6245	66.1482	0	C174
176	-0.503594	0.157587	0.487334	-0.127808	-0.345237	-0.365844	0.412948	1.50459	0.198617	-0.229342	-0.962237	0.225961	0.0125102	13	52.6689	-26.9632	0	C175
177	1.418	0.127958	-0.772655	0.056911	0.494316	-0.403834	0.0582398	0.153214	-0.291259	-0.667455	0.279944	-0.577373	0.461734	2	-16.8335	-38.5038	0	C176
178	0.953647	0.13692	-0.564319	-0.204473	0.595808	-0.474632	0.214816	0.400583	-0.153139	-0.684511	0.403392	-0.39684	0.0194213	37	-24.4278	-8.49689	0	C177
179	1.42429	0.370464	-0.931458	0.027681	0.900141	-0.272409	0.227419	0.563431	-0.234822	-0.759579	-0.564674	-0.580134	0.326822	34	16.6756	-43.8401	0	C178
180	1.11559	0.183379	-0.731674	-0.225337	0.52667	-0.330702	0.107381	0.333739	-0.184618	-0.834632	0.585999	-0.355535	0.12178	37	-22.5267	-9.30574	0	C179
181	-1.0972	0.364557	1.77138	0.991133	-0.979534	0.329802	-0.778445	-0.0274613	-0.0216736	0.914541	-0.673143	0.418359	-0.198202	3	-55.0963	4.56579	0	C180
182	-1.32286	0.18642	2.58346	0.641355	-1.10797	-0.273205	-0.574866	1.25154	0.571312	0.140812	-0.441383	0.0250035	-0.44442	3	-43.596	11.2411	0	C181
183	0.703637	0.27395	-0.43536	0.279493	0.817402	-0.659745	0.393213	0.0343358	0.138282	-0.821758	-0.199366	-0.230246	-0.0464068	24	17.7517	-16.5421	0	C182
184	1.03405	0.353747	-0.861429	-0.247169	0.933986	-0.569066	0.404589	0.227646	0.0725099	-0.722704	-0.157815	-0.141987	0.0357998	26	10.4676	-4.89097	0	C183
185	0.0844558	0.628347	-0.398362	-0.0583458	1.0845	-0.733718	0.408656	0.790968	0.09029	-0.684094	-0.0536543	-0.273865	-0.554878	20	2.73686	23.7514	0	C184
186	-1.02117	-1.02447	0.207695	-0.670439	-1.49425	1.21969	-1.03428	1.35621	-0.739359	1.88908	3.23698	0.631924	-0.531817	32	-24.2362	74.9127	0	C185
187	1.497	-0.050135	-0.635019	0.245035	0.446162	-0.493834	0.0515198	0.407872	-0.138238	-0.930556	-0.311697	-0.316383	0.600943	11	-4.84165	-47.674	0	C186
188	-1.10578	-0.249898	1.98409	-0.312773	-0.273817	-0.262344	-0.57615	0.798234	1.22294	0.516086	-0.767969	0.16752	-0.289321	23	30.7431	-60.2954	0	C187
189	-0.257063	0.206072	-0.0139094	-0.978248	-1.15279	1.90801	-1.31755	-1.51032	0.310387	1.38438	2.19554	0.372791	0.320794	5	-42.555	27.5031	0	C188
190	-1.02428	0.690901	0.146538	-0.877219	1.18595	0.228326	0.3528	-1.80739	-0.0348892	0.791846	2.36672	-0.056773	-0.785889	10	22.3699	59.2484	0	C189
191	-1.08188	-0.912638	0.536945	-0.629653	-1.48461	1.071	-0.963046	0.79262	-0.859818	1.83724	3.03452	0.690109	-0.283069	32	-26.3917	73.6977	0	C190
192	1.44271	0.036617	-0.322671	0.128514	0.590565	-0.515274	0.12633	0.537152	-0.300337	-0.781125	-0.589263	-0.408681	0.409659	11	-4.38586	-40.7697	0	C191
193	1.97177	0.194425	-0.53023	0.484054	0.706879	0.0258572	-0.0665624	0.160335	-0.666579	-0.994049	-0.459198	-0.957163	0.723752	27	-20.5426	-59.9706	0	C192
194	1.21683	0.0199902	-0.57813	-0.0860624	0.384701	-0.543973	0.141057	0.0950657	-0.0592935	-0.666778	0.377148	-0.384303	0.340962	15	-21.1775	-25.969	0	C193
195	-0.974126	-0.265738	2.33976	-0.130673	-0.339095	-0.366967	-0.415572	0.7395	1.24036	-0.283593	-0.455105	0.190401	-0.398626	23	22.0029	-64.6783	0	C194
196	1.00019	0.222682	-0.527233	-0.149598	0.749831	-0.61461	0.437174	0.399213	-0.0882922	-0.630205	-0.307538	-0.246727	0.0293594	26	11.9005	-11.5505	0	C195
197	-0.268274	0.256703	0.337373	-0.603681	-0.669884	2.12575	-1.07546	-1.75014	0.865537	1.90086	-0.759255	0.645466	0.418666	6	-61.3417	26.0162	0	C196
198	-0.163687	1.01442	-0.844113	-0.270882	1.53403	-0.463534	0.536341	0.352542	-0.0722199	-0.237982	0.834722	-0.600156	-1.04577	4	-2.58166	45.6492	0	C197
199	-1.19652	-0.716115	0.983013	0.254751	-0.938036	0.423491	0.388571	0.265198	0.473153	0.878246	-0.943855	0.862594	0.0511639	38	72.2919	7.09441	0	C198
200	1.48781	-0.20721	-0.388144	0.739469	0.229349	-0.36	-0.117135	0.32052	-0.258287	-0.970192	-0.127959	-0.452003	0.454384	2	-17.5281	-53.5867	0	C199
201	-0.893303	-0.566173	0.0838939	-0.589706	-1.40021	1.30177	-1.07374	0.226161	-0.601762	2.01919	2.41146	0.642799	-0.0213021	32	-26.859	65.9905	0	C200
202	0.889323	0.528018	-0.753195	-0.25376	0.902738	-0.430685	0.337081	0.301329	-0.0040533	-0.398293	-0.211516	-0.424901	-0.166022	12	5.8809	3.60103	0	C201
203	-0.243243	0.343234	-0.401723	0.730638	0.857142	-0.153825	0.0074577	0.013063	-0.493808	0.339875	0.58379	-0.456413	-0.859424	4	-8.51524	51.7499	0	C202
204	-1.14051	0.450581	0.03069	0.877657	0.887269	0.361978	-0.0575563	-1.79852	-0.533919	0.876746	1.86928	-0.164871	-0.739931	1	0.120149	76.252	0	C203
205	-0.811504	0.885111	-0.525188	-0.466975	1.41582	0.118684	0.492339	-1.02983	0.167439	0.69999	0.728877	-0.162888	-0.944995	7	11.7592	80.2622	0	C204
206	-0.9289	0.443431	0.0293199	-0.569979	1.24563	0.464938	0.214541	-1.83796	-0.321219	1.17653	1.57232	0.0992863	-0.573714	7	17.9017	71.225	0	C205
207	-1.11114	-0.505743	0.17636	0.0138256	-0.926357	0.376684	0.674631	0.562104	0.518149	0.927399	-1.06049	0.904744	0.161321	38	70.0269	10.0625	0	C206
208	1.37311	-0.207872	-0.48907	0.0672337	0.273138	-0.281491	0.076667	0.509078	-0.340619	-0.686758	0.0564274	-0.541591	0.481412	18	-40.892	-35.2127	0	C207
209	0.999888	0.493484	-0.531709	-0.314508	0.93268	-0.357939	0.198923	-0.00526867	-0.165965	-0.559281	0.140599	-0.61864	0.0731446	26	3.37178	-6.69355	0	C208
210	1.52154	0.22448	-0.439642	0.452359	0.723001	-0.438313	0.13475	0.266701	-0.181408	-1.10813	-0.648069	-0.552168	0.494302	11	13.1288	-51.3736	0	C209
211	-0.407136	0.231654	0.932772	-1.01946	-1.12233	1.82051	-1.40748	-1.41173	0.693396	1.16188	1.71169	0.20792	0.00229171	5	-44.0358	30.065	0	C210
212	-1.19277	-0.515956	0.74331	1.05096	-0.713222	-0.0817696	0.404314	0.622258	0.499453	0.344522	-0.719757	0.780278	-0.525826	38	62.2769	11.8029	0	C211
213	-0.835881	-0.544268	0.499235	0.45954	-0.781728	0.421389	0.207231	-0.164242	0.114008	0.92029	-0.97907	0.70126	0.54884	25	84.6723	7.86563	0	C212
214	2.98375	-0.737486	1.41203	0.595824	-1.31858	1.19045	-1.7395	-0.77467	-1.18476	1.37918	-0.986074	0.082148	1.7515	3	-51.4231	-14.8873	0	C213
215	-1.41915	-0.806106	0.831333	1.22508	-1.01262	-0.248829	0.267066	0.814303	0.419145	0.295068	0.683676	0.433712	-0.611531	22	47.4167	28.0045	0	C214
216	1.23182	0.307078	-0.771258	0.312245	0.84146	-0.481835	0.345616	0.404829	0.0400719	-0.809162	-0.736171	-0.378479	0.134577	34	12.379	-31.2102	0	C215
217	-0.799102	0.71426	-0.252544	-0.159048	1.225	0.17021	0.298054	-1.57234	-0.358352	0.723868	1.41149	-0.0398115	-0.681734	7	10.7527	76.1724	0	C216
218	1.77741	-0.0230821	-0.760936	0.224593	0.606295	-0.0684108	0.136856	0.00791123	-0.265923	-1.09668	-0.15386	-0.621878	0.719971	11	-1.28178	-55.2385	0	C217
219	1.33544	0.102829	-0.450185	0.0251373	0.653678	-0.366766	0.0706529	0.170099	-0.417634	-0.825314	0.164983	-0.467807	0.309371	2	-16.7108	-39.6541	0	C218
220	-1.1112	0.683334	0.345498	-0.739466	1.0135	0.41131	0.178164	-2.39329	-0.133867	1.01341	3.22067	0.0926454	-0.801275	10	31.4595	60.3913	0	C219
221	1.25297	-0.00752877	-0.573803	0.162411	0.504925	-0.421757	0.247753	0.0933519	-0.201788	-0.906907	0.250816	-0.350326	0.237845	15	-14.9697	-26.4761	0	C220
222	0.853259	0.559285	-0.488262	-0.16117	1.16177	-0.696389	0.459243	0.13172	0.0625389	-0.893742	-0.118477	-0.441488	-0.06822	33	21.6948	3.41093	0	C221
223	-1.02107	-0.450588	1.42227	0.0366036	-1.00301	0.913794	-0.898664	0.221028	0.324984	1.73248	-1.06771	0.556092	0.275837	17	-73.2183	-22.9241	0	C222
224	-0.994029	0.767332	-0.152226	0.406025	1.13305	0.0865919	0.131161	-0.979359	-0.440288	0.666158	1.13526	-0.220441	-1.01801	1	-4.52788	68.0823	0	C223
225	-1.08192	-0.622681	1.34776	0.366171	-1.1179	0.58812	0.247084	-0.630177	0.355419	0.995716	-0.636434	0.834719	0.234402	25	88.0809	19.5955	0	C224
226	-1.1276	0.0589111	1.02428	-0.28182	-0.369108	-0.0872453	-0.0729709	1.22769	1.70517	0.496549	-1.33353	0.363865	-0.645663	23	35.9836	-61.7771	0	C225
227	1.90244	-0.24471	-0.274908	0.304607	0.237979	-0.176555	-0.120026	0.377263	-0.418956	-0.921757	-0.497078	-0.535041	0.816766	27	-20.9346	-67.4471	0	C226
228	0.681303	0.107379	-0.790311	-0.275922	0.646445	-0.544656	0.410248	0.647072	-0.17042	-0.528221	0.343959	-0.151163	-0.0852963	21	-17.2139	3.59893	0	C227
229	-0.883443	1.18628	-0.489575	-0.545543	1.5612	0.343787	0.650293	-1.82775	-0.0562183	0.839698	0.788561	-0.0695636	-0.614103	7	15.4705	81.6335	0	C228
230	-0.171406	0.347037	0.166744	-0.767719	-1.27594	2.19713	-1.30684	-1.95415	-0.57948	1.84659	2.8207	0.418404	0.487982	30	-35.4895	42.3921	0	C229
231	1.38881	-0.0690623	-0.682775	-0.102242	0.504895	-0.315991	0.0732071	0.598803	-0.195499	-0.720102	-0.0818444	-0.444846	0.376459	15	-9.76438	-36.9119	0	C230
232	0.298111	0.225969	-0.445452	0.0602313	0.608017	-0.578476	0.262904	0.731561	-0.00159285	-0.72721	0.463756	-0.237819	-0.437245	21	-22.7296	15.7385	0	C231
233	1.23218	0.23857	-0.305578	-0.123217	0.591627	-0.175754	0.00972223	0.638651	-0.453901	-0.767728	-0.386177	-0.534117	0.33462	15	-5.98324	-33.6712	0	C232
234	-0.970083	0.244644	1.59182	0.80567	-1.00341	0.227588	-0.571876	-0.255052	-0.095266	1.08519	-0.71338	0.29096	0.222288	3	-55.1863	-2.45372	0	C233
235	-1.22005	-0.620066	0.649203	-0.213343	-1.0676	0.576731	0.213624	1.52259	0.339065	0.665562	-0.183988	0.411948	-0.369573	8	50.5042	-2.62369	0	C234
236	1.25455	-0.0227986	-0.640858	0.0361047	0.422672	-0.47757	0.239994	-0.0104167	-0.00980718	-0.85858	0.356791	-0.337101	0.350447	15	-20.683	-26.3548	0	C235
237	2.2562	-0.35	-0.426082	0.449426	0.0445638	0.082604	-0.336973	0.520143	-0.802215	-0.869726	-0.00934896	-0.927744	1.04994	28	-37.5624	-66.3861	0	C236
238	0.24069	0.974398	-0.629961	-0.298232	1.68775	-0.725671	0.765348	0.121067	0.239586	-0.523558	-0.0323694	-0.467017	-0.814941	20	13.6215	37.7128	0	C237
239	2.15673	-0.488649	0.098082	0.576315	-0.0230467	-0.253421	-0.671302	0.709987	-0.741848	-0.705538	-0.031985	-0.821161	0.857157	28	-38.2387	-63.5371	0	C238
240	1.29806	-0.0522936	-0.467357	-0.206864	0.498171	-0.298565	0.216187	0.294282	-0.106552	-0.851929	-0.0222922	-0.325659	0.293446	15	-16.1974	-24.1091	0	C239
241	-0.177791	-0.212114	0.423753	-0.482697	-1.20546	2.2345	-1.12189	-1.69227	-0.688775	2.70736	0.358407	1.23386	0.441076	36	-49.5905	43.7683	0	C240
242	1.20999	0.043639	-0.584149	0.0863908	0.587394	-0.561173	0.431146	0.233644	-0.127203	-0.896091	-0.091037	-0.201888	0.168556	15	-10.8042	-21.0328	0	C241
243	-0.0977745	0.969053	-0.221568	0.262995	1.34075	-0.642086	0.380258	0.485813	-0.20309	-0.755459	0.615731	-0.740607	-0.907679	4	-1.08091	44.8762	0	C242
244	-1.16166	0.162133	-0.114902	0.198696	0.7115	0.545207	-0.119302	-1.19921	-0.538558	1.06705	1.88973	0.165583	-0.853862	1	3.68128	68.0381	0	C243
245	0.698305	0.242475	-0.178379	-0.227489	0.722368	-0.562637	0.197181	0.395505	-0.299606	-0.589722	0.148569	-0.26728	-0.0870975	31	-12.8472	-2.25152	0	C244
246	0.491834	0.609872	-0.332562	-0.558906	1.06473	-0.648439	0.372168	-0.0991733	0.0310541	-0.497032	0.460595	-0.323943	-0.272818	9	-3.01722	23.1832	0	C245
247	-0.537543	0.416498	-0.589479	0.0533665	0.803227	0.0328218	-0.0971086	0.391593	-0.319329	0.442505	0.919853	-0.393279	-0.84842	4	-6.34601	54.9356	0	C246
248	1.25245	-0.100176	-0.469518	0.0395206	0.309747	-0.295806	0.113534	0.0842758	-0.11708	-0.607417	0.0599831	-0.304651	0.234512	15	-18.9225	-26.3155	0	C247
249	0.125404	-0.0165145	-0.0883994	-0.382935	-1.00839	2.52599	-0.88513	-1.76592	-0.439826	2.78438	-1.01257	1.13316	1.00919	36	-61.5004	44.4931	0	C248
250	-0.935704	-0.284609	1.9271	-0.271372	-0.23395	-0.203507	-0.356206	0.787023	1.13746	0.185196	-0.744646	0.216692	-0.521019	23	25.7488	-61.5397	0	C249
251	0.138098	0.961561	-0.641903	-0.290062	1.4439	-0.587691	0.893209	-0.104634	0.298466	-0.719924	-0.173819	-0.100842	-0.6624	20	16.0059	37.5014	0	C250
252	-1.06967	-0.480829	0.841158	0.043436	-1.01355	0.541212	0.576931	0.121704	0.406127	1.12657	-1.03839	0.814384	-0.0641679	38	78.4926	8.92604	0	C251
253	-1.07467	0.492795	-0.176143	0.370787	0.95985	0.585959	0.124649	-1.62902	-0.287498	1.17235	0.573967	0.270357	-0.699811	1	6.00644	78.3717	0	C252
254	0.952512	0.0759193	-0.218483	0.182895	0.602112	-0.507146	0.210307	0.401788	-0.187279	-0.856294	-0.0424987	-0.45888	0.0737886	15	-4.7437	-20.9503	0	C253
255	0.0739277	0.743674	-0.709063	0.194036	1.41487	-0.620143	0.354318	0.596282	-0.271418	-0.282165	0.159922	-0.603005	-0.6361	4	-4.44218	41.0936	0	C254
256	2.17725	-0.598218	-0.491432	0.29983	-0.284314	0.141617	-0.41803	0.952998	-0.955898	-0.50188	0.114378	-0.644035	0.887019	28	-40.2854	-62.5352	0	C255
257	0.500326	-0.986188	0.691886	1.45764	-1.04043	-0.159745	0.0259061	-0.659578	0.0241563	0.101597	0.380576	0.33862	-0.05462	14	57.8075	38.4188	0	C256
258	0.748821	0.479967	-0.75423	-0.441647	0.828769	-0.543783	0.406088	-0.168158	0.0911056	-0.428045	0.488916	-0.294888	-0.117522	12	4.5134	-0.460826	0	C257
259	-0.900945	-0.27448	3.1762	-0.276862	-0.264236	-0.616807	-0.250657	-0.494291	1.44365	-0.652416	-0.910095	0.672429	0.485335	35	7.97762	-81.8529	0	C258
260	-0.628161	-0.450441	2.2787	-0.143867	-0.461108	-0.247135	-0.361957	-0.210888	1.39475	-0.0375455	-0.816696	0.432496	-0.0286772	35	18.0792	-68.6185	0	C259
261	1.82529	-0.30496	-0.323682	0.158505	0.427704	-0.43695	0.119083	0.433158	-0.376353	-1.03528	-0.181892	-0.393223	0.537395	2	-26.5678	-45.1496	0	C260
262	1.52763	0.119334	-0.481351	-0.0691453	0.385427	-0.343566	0.0786783	0.345289	-0.285852	-0.981049	0.159322	-0.516039	0.402513	2	-19.2736	-40.2969	0	C261
263	0.746997	0.683124	-0.841727	-0.25419	1.09665	-0.450402	0.347397	0.361994	-0.182489	-0.760314	0.295359	-0.480575	-0.168535	19	14.0697	8.0039	0	C262
264	1.22902	0.154054	-0.555079	0.0550671	0.923564	-0.318128	0.168277	0.0384685	-0.341246	-0.736959	0.124664	-0.646366	0.241712	15	-8.64788	-26.4745	0	C263
265	-0.0273092	0.00784663	-0.00494545	-0.808818	-1.07965	2.41798	-0.858041	-1.8456	-0.492703	2.63175	-0.456808	1.43194	0.930971	36	-55.6808	44.8519	0	C264
266	0.288355	-0.794814	0.400002	0.10224	-1.2719	-0.145391	-0.205776	2.01899	-0.287627	0.211063	0.180211	0.0920886	0.0343543	10	23.4604	44.0952	0	C265
267	1.87077	-0.277107	-0.105076	0.397825	0.159063	-0.0935007	0.0562049	-0.286917	-0.388441	-1.03601	-0.264416	-0.301738	0.663114	27	-22.468	-64.8161	0	C266
268	0.843035	0.331975	-0.576199	-0.129166	0.682713	-0.400195	0.16202	0.506856	-0.110706	-0.753997	0.101697	-0.50505	0.106311	31	-7.83507	-8.87444	0	C267
269	1.54267	-0.00759622	-0.508289	0.353002	0.446611	-0.197071	0.000402	0.479914	-0.447202	-0.947922	0.000486	-0.717172	0.387297	2	-23.2192	-51.8687	0	C268
270	-1.24681	-0.656108	0.261063	1.14671	-1.08354	-0.29329	0.246896	0.537167	0.313939	0.360557	0.792227	0.60309	-0.292419	14	51.2631	27.0975	0	C269
271	1.20724	0.0457924	-0.872285	-0.302467	0.57552	-0.0820425	0.165131	0.287673	-0.0937526	-0.765625	-0.243791	-0.261287	0.690501	34	6.53006	-37.1259	0	C270
272	1.90637	-0.208455	-0.399241	0.546781	0.205759	-0.146956	-0.236649	0.699004	-0.633334	-1.03618	-0.204305	-0.683633	0.732717	28	-33.2025	-67.3066	0	C271
273	-1.28024	-0.116221	-0.164066	0.218621	-0.292092	0.190685	0.560961	-2.36284	0.866982	0.73969	1.49137	1.38566	-0.062096	10	40.3684	53.628	0	C272
274	1.92365	-0.467065	-1.03043	0.261508	0.0759842	-0.112016	0.0395691	0.525109	-0.141814	-1.02471	-0.0668351	-0.177945	0.770836	27	-22.7127	-73.3984	0	C273
275	1.09411	0.346811	-0.506197	-0.0916798	0.773819	-0.513012	0.267218	0.553309	-0.0643125	-0.970987	-0.226438	-0.490473	0.16322	26	7.59917	-21.5549	0	C274
276	0.399252	0.751692	-0.686339	0.0255608	1.33917	-0.562507	0.3685	0.323107	-0.496647	-0.178878	0.187519	-0.699646	-0.391061	4	-5.40225	41.7985	0	C275
277	-1.03256	0.557671	0.384207	1.39616	1.06069	0.155326	0.289923	-1.97434	-0.553474	0.814762	1.04059	-0.0126449	-1.05515	1	-5.18365	80.4687	0	C276
278	0.575791	0.500119	-0.43509	-0.392629	1.04057	-0.609382	0.417335	0.493502	-0.0104102	-0.606852	-0.0343179	-0.460508	-0.177872	12	2.68051	11.5344	0	C277
279	1.21866	0.483054	-0.38969	0.0283959	1.00362	-0.515837	0.198374	0.55228	-0.219974	-1.1041	-0.228035	-0.768706	0.192005	26	7.88791	-22.7917	0	C278
280	1.76654	-0.27019	-0.483553	0.315359	0.346414	-0.162281	-0.0247278	0.171272	-0.316855	-0.906326	-0.408976	-0.378996	0.756349	27	-18.2043	-67.9849	0	C279
281	-0.821187	-0.308734	1.97002	-0.304418	-0.813375	0.686096	-0.54103	-0.434968	0.680766	1.23719	-1.03586	0.671036	-0.108491	17	-65.8707	-16.5014	0	C280
282	1.45086	-0.172845	-0.788641	0.437969	0.24785	-0.389529	0.214497	0.468735	-0.300345	-0.791028	0.11407	-0.44285	0.350373	18	-26.4584	-37.1163	0	C281
283	-1.02391	0.0375493	1.51378	0.900486	-0.760111	0.255279	-0.730574	-0.270917	0.0384072	1.19263	-0.559323	0.419973	-0.151369	3	-55.7097	-1.90347	0	C282
284	-1.02664	0.707855	-0.287451	-0.173054	1.26348	0.113088	0.286802	-1.14867	-0.057346	0.826114	1.03931	0.0420289	-0.958642	7	10.662	79.1079	0	C283
285	0.221186	0.698377	-0.618962	0.216662	1.10578	-0.428767	0.128582	0.191638	-0.427267	-0.121752	0.578268	-0.596375	-0.64355	4	-5.99201	46.956	0	C284
286	-1.00528	0.429173	-0.437139	0.168743	0.885734	0.596654	-0.0444618	-1.47597	-0.39179	1.14731	1.5153	0.0984524	-0.774775	1	5.52818	71.1088	0	C285
287	-1.18021	0.371669	-0.117496	0.277363	0.882907	0.401626	0.0631464	-1.59666	-0.410364	1.1324	1.40127	0.126465	-0.633302	1	4.34738	71.9085	0	C286
288	-1.30344	-0.408181	3.34145	-0.350207	-0.428254	-0.465212	-0.0821573	-0.40573	1.5814	-0.638951	-0.763794	0.77143	0.440184	35	9.67219	-82.496	0	C287
289	1.33343	-0.291004	0.238594	0.317967	0.329385	-0.423507	0.00787785	0.122087	-0.352515	-0.870119	-0.145815	-0.410406	0.41556	2	-16.2553	-48.4702	0	C288
290	1.12522	0.694347	-0.735054	-0.0540351	1.16898	-0.467637	0.385623	0.196609	0.0407312	-0.931998	-0.259637	-0.757993	0.0672448	24	26.0212	-14.8727	0	C289
291	-1.3347	-0.24438	3.03725	-0.359908	-0.210389	-0.552091	-0.147646	-0.138896	1.47495	-0.418694	-0.967104	0.685069	0.312952	35	13.402	-78.2147	0	C290
292	-1.07832	-0.754641	0.769401	-0.298422	-1.41468	1.14585	-0.909315	-0.751865	-0.464381	2.05456	3.21015	0.852105	-0.470362	32	-37.5095	66.8952	0	C291
293	0.979487	0.220001	-0.32978	0.332931	0.749255	-0.551179	0.142815	0.362298	-0.0765195	-0.91859	-0.120517	-0.563289	0.0510016	15	-0.478053	-25.0737	0	C292
294	0.321317	1.18928	-0.58262	-0.219129	1.71361	-0.680248	0.778863	0.338774	0.152802	-0.777257	-0.408771	-0.620071	-0.642484	20	17.9279	34.0277	0	C293
295	1.72597	-0.0967045	-0.391767	0.422742	0.274311	-0.178551	-0.188359	0.842416	-0.613181	-0.941425	-0.0618156	-0.865756	0.570026	28	-27.0519	-55.644	0	C294
296	-0.927376	-0.633676	0.796341	-0.731576	-1.35379	1.15387	-1.52839	0.0242703	-0.51913	2.02378	2.91722	0.716086	-0.0274452	32	-33.2144	68.1879	0	C295
297	-1.05608	0.336637	0.00578792	0.00212393	0.962111	0.513497	0.0150385	-1.38489	-0.331345	1.1158	1.2059	0.145229	-0.868783	1	3.44437	71.4801	0	C296
298	-1.0218	0.780826	-0.0713406	-0.672628	1.29514	0.495283	0.375799	-1.97506	-0.0522063	1.01396	1.76139	-0.0516372	-0.728983	7	21.2845	74.1822	0	C297
299	1.02249	0.120985	-0.449503	-0.0257744	0.713763	-0.365897	0.27066	0.241725	-0.188126	-0.686199	-0.261346	-0.351511	0.17696	34	10.6653	-28.129	0	C298
300	1.25857	-0.00288293	-0.390404	0.516535	0.253022	-0.511319	0.0698168	0.280713	-0.240024	-0.757106	0.0986486	-0.492731	0.187139	2	-14.5637	-48.4639	0	C299
301	1.40356	0.128909	-0.546103	0.450448	0.517884	-0.500867	-0.00522514	0.720896	-0.326116	-1.02048	-0.13986	-0.640403	0.372405	27	-13.7729	-54.9809	0	C300
302	1.64975	-0.0157625	-0.712865	0.38033	0.463077	-0.317797	-0.0428124	0.348488	-0.343408	-0.971919	0.168724	-0.606424	0.424738	2	-21.7272	-48.7518	0	C301
303	0.525919	0.384091	-0.713996	-0.466265	0.885569	-0.498216	0.442168	0.859585	-0.0672806	-0.602102	0.165098	-0.257073	-0.317668	9	-11.7454	15.7411	0	C302
304	0.660301	0.124022	-0.696476	-0.389722	0.613961	-0.526207	0.446026	0.666453	0.110316	-0.546641	-0.0858373	-0.0352346	-0.0972425	21	-13.8922	5.90108	0	C303
305	-0.98364	0.319315	0.0836113	-0.124527	0.785099	0.709957	-0.065378	-2.10704	-0.472688	1.49438	1.70825	0.368324	-0.431361	7	15.2176	65.2614	0	C304
306	1.20533	0.545382	-0.852167	0.0242931	0.967284	-0.513042	0.26188	0.227739	-0.13683	-0.831279	0.0276141	-0.716331	0.221533	24	19.9534	-22.9652	0	C305
307	1.64888	0.319738	-0.874761	0.00470649	0.846455	-0.221939	0.320641	0.0805116	-0.0416136	-0.84657	-0.773859	-0.508875	0.587865	11	6.24917	-57.9099	0	C306
308	-1.01315	0.898249	0.186162	-0.723901	1.16908	0.240929	0.325436	-2.28483	-0.0771318	0.931113	2.89737	-0.0310054	-0.818521	10	26.5543	57.1567	0	C307
309	-1.34109	0.837231	0.392556	-0.303343	-0.629172	-0.313294	0.585581	1.7128	0.620543	0.139657	-1.05932	0.646324	-0.412209	13	47.6722	-27.4498	0	C308
310	0.789666	-0.105307	-0.501664	0.165885	0.365338	-0.637355	0.218128	0.608565	0.227543	-0.81957	0.0850748	-0.197863	0.0415035	21	-30.4832	-2.05187	0	C309
311	1.09788	0.0116004	-0.690176	-0.284765	0.383314	-0.448491	0.362711	0.446307	-0.0623427	-0.637612	0.0685845	-0.2508	0.27518	37	-20.3688	-16.537	0	C310
312	1.37566	-0.151586	-0.704149	-0.0672498	0.291117	-0.296359	0.140535	0.057409	-0.127881	-0.785664	0.213207	-0.192248	0.542681	2	-23.0316	-36.0298	0	C311
313	-1.10843	-0.339693	3.2893	-0.285611	-0.233737	-0.673155	-0.0809565	-0.307457	1.5731	-0.481907	-1.12984	0.768597	0.378392	35	9.15505	-80.8217	0	C312
314	-1.27835	-0.785909	0.536126	0.0731446	-0.999849	0.169469	0.498533	0.253199	0.56166	0.583594	0.312575	0.82003	-0.138148	22	55.6941	19.4994	0	C313
315	-0.118532	-1.06705	0.457234	1.43289	-1.01021	-0.390116	0.125828	0.509876	0.0134491	0.105945	0.572935	0.216438	-0.245848	14	54.1871	34.1713	0	C314
316	-0.610019	0.465102	0.224411	-0.787385	0.715666	0.499036	-0.124152	-1.80906	-0.59984	1.01269	2.47994	0.0942916	-0.572725	10	22.3785	63.8145	0	C315
317	-1.33162	-0.781587	0.401291	0.435132	-0.938841	0.0380545	0.51584	0.999639	0.295276	0.190729	0.520622	0.6552	-0.33755	22	51.2029	20.021	0	C316
318	1.37702	0.192486	-0.72094	-0.0829017	0.645745	-0.406881	0.23373	-0.208122	-0.0988213	-0.796296	0.350603	-0.501059	0.362048	15	-10.2538	-25.0598	0	C317
319	0.451037	0.578376	-0.360657	-0.313499	1.19534	-0.653015	0.459135	1.05259	-0.0536598	-0.619346	-0.387046	-0.563324	-0.390212	12	3.45773	15.7783	0	C318
320	0.991064	0.439323	-0.760075	-0.205771	1.00083	-0.436487	0.351354	0.107964	0.0621635	-0.758271	0.0204175	-0.472404	-0.00982828	33	13.9499	0.21819	0	C319
321	-0.315731	0.26204	-0.325965	-0.709351	-1.07743	2.09042	-1.29351	-1.73444	0.465502	1.55761	2.21791	0.432837	0.0884567	5	-42.6905	27.6093	0	C320
322	-1.09011	-0.220932	3.05534	-0.361723	-0.518199	-0.479247	-0.126008	-0.210488	1.59536	-0.78942	-0.688748	0.562694	0.489123	35	11.1619	-79.2354	0	C321
323	0.984938	0.0184765	-0.375684	-0.126257	0.439053	-0.571962	0.387659	0.47877	0.199687	-0.74557	-0.17749	-0.341074	0.0680623	31	-13.3493	-14.4581	0	C322
324	-1.0761	-0.674632	0.489025	0.75777	-0.873006	-0.257057	0.624169	-0.142319	0.43171	0.345196	0.436653	0.691289	-0.23751	14	57.1394	27.3179	0	C323
325	1.12894	0.308387	-0.682318	-0.220034	0.821799	-0.446604	0.304916	0.195501	-0.0134635	-0.846386	-0.107911	-0.274191	0.156613	26	7.51627	-11.5898	0	C324
326	-1.23971	-0.441731	2.51809	-0.217277	-0.220129	-0.262961	-0.0581723	0.263487	1.36309	-0.118405	-0.682395	0.0279128	0.000833	35	21.4062	-71.8957	0	C325
327	1.52005	-0.0907388	-0.64076	0.646621	0.370042	-0.362954	0.168102	0.16864	-0.264175	-0.96785	-0.368736	-0.370429	0.594778	11	-1.77426	-56.6034	0	C326
328	-0.908089	0.600198	0.194885	-0.661855	0.920657	0.31316	0.236424	-1.97576	-0.288378	1.01663	2.05252	0.143722	-0.550254	10	21.9467	67.5209	0	C327
329	-1.05283	0.651327	0.0998221	-0.692556	1.18989	0.400367	0.261619	-2.2514	-0.105981	1.02876	2.6502	0.0886749	-0.711316	10	27.3582	58.6369	0	C328
330	-1.397	-0.522455	0.886439	0.26831	-1.17128	0.0603352	0.291858	2.0472	0.373032	0.489155	-0.767053	0.560109	-0.137741	8	48.3499	-11.2183	0	C329
331	1.40957	0.138001	-0.823489	-0.121184	0.548007	-0.455592	0.160679	0.610931	0.025504	-0.930452	-0.114325	-0.458021	0.433248	34	3.17075	-39.042	0	C330
332	-1.07008	0.510785	-0.328277	-0.569724	0.967983	0.570628	0.0866376	-2.02406	-0.413991	1.13381	2.71823	0.212974	-0.451316	10	24.7785	64.5216	0	C331
333	1.23458	0.199382	-0.615213	-0.218281	0.537218	-0.346139	-0.00530939	0.157197	-0.338552	-0.601859	0.65637	-0.492405	0.107655	37	-25.5051	-11.0142	0	C332
334	1.04656	0.00653039	-0.521751	0.24357	0.552199	-0.429383	0.100986	0.49429	-0.2637	-0.641448	-0.00495108	-0.533826	0.204065	15	-4.06699	-21.4016	0	C333
335	1.71493	-0.0235402	-0.411307	0.565817	0.294788	-0.240404	-0.0790478	0.476588	-0.497385	-0.850361	-0.381651	-0.697838	0.564365	27	-18.3111	-59.9377	0	C334
336	1.12513	0.345789	-0.739881	-0.0252816	0.848165	-0.462534	0.416862	0.239843	-0.180307	-0.827058	-0.196847	-0.448543	0.271937	24	17.8085	-25.3194	0	C335
337	1.04084	0.41831	-0.597148	-0.295976	0.900719	-0.56688	0.437125	0.0152804	0.212598	-0.767408	-0.23747	-0.241884	0.00577158	33	13.1165	-2.83975	0	C336
338	-0.0679821	0.0999326	0.230818	-0.544856	-1.07835	2.45069	-1.00867	-1.52324	-0.640473	2.70436	-0.873901	1.33274	0.665143	36	-62.7314	42.053	0	C337
339	0.724738	0.281312	-0.282542	-0.1796	0.707815	-0.515565	0.33827	0.129602	-0.14975	-0.789088	0.19251	-0.170764	-0.0854894	12	-4.52751	1.90459	0	C338
340	0.314172	0.116387	-0.26965	0.685049	0.709314	-0.783744	0.470727	0.28967	0.155311	-0.800627	-0.136798	0.0482467	-0.515423	12	-4.14609	8.94326	0	C339
341	2.11261	-0.32263	-0.780744	0.460773	0.147537	-0.0896533	-0.177152	0.304347	-0.600406	-0.900474	0.187236	-0.677754	0.908224	28	-30.7679	-62.9082	0	C340
342	0.51878	0.328807	-0.631324	-0.47109	0.813388	-0.704716	0.473244	0.26759	0.319955	-0.655234	0.437428	-0.224296	-0.155957	21	-15.0894	12.4837	0	C341
343	0.531324	0.285618	-0.583576	-0.0430541	0.890932	-0.396208	0.193273	0.57165	-0.478347	-0.0189661	0.296584	-0.740718	-0.236734	4	-8.64154	42.7583	0	C342
344	1.55679	-0.162743	-0.543227	0.162357	0.273148	-0.287189	0.0103428	0.693662	-0.601155	-0.794254	0.00517098	-0.450103	0.512963	28	-29.0753	-50.4889	0	C343
345	-0.909283	-0.716738	0.67655	-0.582794	-1.46387	1.02929	-0.874826	0.207014	-0.678702	1.97805	2.72755	0.645832	-0.400129	32	-28.9164	69.2875	0	C344
346	-1.42834	-0.652037	0.983915	0.260983	-0.924474	0.351296	0.422381	2.10639	0.306223	0.415732	-0.922716	0.575577	-0.44232	8	48.4997	-11.4532	0	C345
347	1.66406	-0.351922	-0.671066	0.0550226	0.0391222	-0.271593	0.199754	0.267401	-0.258161	-0.739791	-0.124292	-0.141794	0.685008	28	-33.9894	-45.4307	0	C346
348	0.852329	0.411349	-0.3542	-0.0758139	0.728998	-0.641248	0.35184	0.258101	0.0485203	-0.994741	-0.0194163	-0.420027	0.136974	33	16.4273	-10.1856	0	C347
349	1.27598	-0.2108	-0.346681	0.0110048	0.227453	-0.188037	-0.239211	0.310362	-0.325883	-0.449256	0.628818	-0.610815	0.157118	18	-39.5485	-28.9204	0	C348
350	0.604439	0.749879	-0.505159	-0.356013	1.1032	-0.772297	0.456968	0.539646	0.0800975	-0.776008	-0.326038	-0.417576	-0.000389	12	6.58013	15.6962	0	C349
351	1.45995	-0.0570707	-0.733972	-0.111408	0.431884	-0.247652	0.133734	0.134186	-0.127953	-0.849208	0.0309241	-0.209204	0.478033	2	-19.1376	-35.8767	0	C350
352	0.801806	0.243199	-0.755855	0.0580461	0.753592	-0.499261	0.200627	0.362134	-0.119469	-0.492182	0.434211	-0.527732	-0.163469	21	-26.7614	-0.597148	0	C351
353	-1.36211	-0.526916	0.632313	0.645385	-0.828416	-0.295336	0.798637	2.0201	0.94452	0.107595	-1.37407	0.682216	-0.298104	13	52.7657	-17.0292	0	C352
354	0.750998	0.741257	-0.536043	-0.273964	1.30691	-0.530265	0.391836	0.179636	-0.0651957	-0.727527	0.0547384	-0.694991	-0.211874	19	17.4405	8.33895	0	C353
355	1.15886	0.212248	-0.237252	-0.260027	0.694231	-0.513366	0.196343	0.227086	-0.0506907	-0.717665	-0.213369	-0.447429	0.187593	26	6.67299	-25.3448	0	C354
356	1.0771	0.0921683	-0.479633	0.03683	0.544022	-0.501846	0.32719	-0.240186	0.0474255	-0.787031	0.0688955	-0.142398	0.193398	15	-9.32207	-18.2519	0	C355
357	-1.08617	-0.943922	0.800895	-0.765729	-1.7397	1.25222	-1.20968	1.04478	-0.723776	1.92047	3.10221	0.703057	-0.168199	32	-26.2625	75.4768	0	C356
358	0.56723	0.40161	-0.368811	0.114654	0.904469	-0.63998	0.164614	0.603758	-0.172366	-0.547115	0.38141	-0.786243	-0.318337	12	-4.89309	12.2392	0	C357
359	-0.29671	0.543057	-0.609269	-0.615485	0.913531	-0.582334	0.818556	0.382113	0.326356	-0.400885	0.235511	0.29625	-0.634878	9	-9.02739	33.1583	0	C358
360	0.821201	0.0860322	-0.653793	-0.186224	0.767758	-0.454248	0.438392	0.704696	-0.303272	-0.426836	-0.053614	-0.431877	-0.0328864	31	-9.09845	-6.06613	0	C359
361	0.751365	0.293612	-0.687757	-0.360785	0.723868	-0.492562	0.207535	0.822248	0.0690499	-0.631197	0.224448	-0.522257	-0.0678046	9	-9.69458	11.8511	0	C360
362	-1.221	-0.724232	0.40549	-0.0122261	-0.829932	0.355877	0.839116	0.215829	0.802113	0.86132	-1.19785	1.12571	0.243401	38	74.4702	13.0878	0	C361
363	1.7666	0.386159	-0.619664	0.51495	0.844653	-0.221835	0.221889	-0.126335	-0.231441	-1.07046	-0.769486	-0.839949	0.755318	11	4.79165	-59.7322	0	C362
364	-1.3688	-0.19221	3.63896	-0.186516	-0.309466	-0.751347	-0.109372	-0.746213	1.59671	-0.763295	-0.709715	0.778135	0.462643	35	8.1	-86.6829	0	C363
365	0.373973	0.649586	-0.515176	-0.374297	1.11162	-0.694129	0.549596	0.006143	0.132822	-0.577534	0.415025	-0.31105	-0.435983	9	-3.20926	24.1172	0	C364
366	1.58184	0.0103779	-0.710024	0.232227	0.362703	-0.127445	0.0490507	-0.0273589	-0.160556	-0.978362	-0.0166037	-0.423737	0.57345	11	-7.37443	-54.0086	0	C365
367	-1.01554	-0.394839	3.27439	-0.228035	-0.185983	-0.566769	-0.247418	-0.262151	1.22802	-0.589626	-0.509815	0.36099	0.10058	35	14.7286	-83.2016	0	C366
368	0.967977	0.293587	-0.302089	-0.213075	0.856547	-0.541682	0.208113	0.489079	-0.159717	-0.768158	0.0821534	-0.503948	-0.129219	31	-8.56788	1.76748	0	C367
369	-1.14602	-0.267261	2.61028	-0.178843	-0.522682	-0.539446	0.105568	0.210394	1.50475	-0.421551	-0.745027	0.254212	0.157488	35	17.8902	-73.5831	0	C368
370	1.82604	-0.369665	-0.755056	0.0397689	-0.0479719	-0.120215	-0.134705	0.711748	-0.376308	-0.659241	0.175609	-0.546821	0.723807	28	-38.6058	-55.546	0	C369
371	-0.839248	-0.348378	1.40097	0.0487397	-1.14061	1.01983	-0.830158	0.294791	-0.19062	1.66854	-0.979259	0.65576	0.233651	17	-76.3341	-26.0328	0	C370
372	-1.16259	-0.37479	2.708	-0.345553	-0.438375	-0.257351	-0.138418	0.254237	1.20326	-0.204745	-0.938215	0.43605	0.202015	35	19.3729	-73.6817	0	C371
373	-1.12721	0.685874	-0.234676	0.500291	1.0279	0.31202	0.237	-1.63071	-0.451101	0.97881	1.39029	0.0127731	-0.886316	1	2.17323	78.6707	0	C372
374	-0.410056	-0.175463	0.790503	-0.695748	-1.46434	1.94372	-1.55543	-1.56766	-0.881883	1.90241	3.33672	0.68294	0.460007	30	-32.5975	39.0538	0	C373
375	0.552686	0.542481	-0.565593	-0.392461	1.15231	-0.58135	0.595443	0.152403	0.0793165	-0.565529	-0.15716	-0.265191	-0.232715	19	12.4484	16.4126	0	C374
376	1.64738	0.0262749	-0.935372	0.230074	0.449642	-0.0988837	0.156651	0.478948	-0.019801	-1.21661	-0.474257	-0.402805	0.711788	27	-6.71494	-65.1364	0	C375
377	0.373817	0.578351	-0.562067	-0.470719	1.21035	-0.51288	0.518814	0.282478	-0.0477584	-0.617947	0.169095	-0.242723	-0.351456	9	-5.23026	20.5203	0	C376
378	-0.0349864	1.0304	-0.571672	-0.368548	1.50274	-0.731303	0.744423	0.203884	0.402046	-0.553014	-0.239121	-0.342629	-0.572769	20	13.9971	35.8234	0	C377
379	1.37398	0.0175658	-0.696738	0.12914	0.466833	-0.265734	0.0639746	0.416105	-0.376924	-0.8401	0.160559	-0.421606	0.303205	2	-25.5888	-37.2679	0	C378
380	1.64691	-0.250916	-0.262097	0.0285229	0.285995	-0.154846	0.00738124	0.21277	-0.40528	-0.915586	0.0410708	-0.457451	0.564361	28	-35.3762	-48.3969	0	C379
381	0.560482	0.459673	-0.75005	-0.180486	0.997716	-0.700802	0.487105	0.379573	0.146385	-0.598832	-0.120736	-0.248342	-0.11184	12	10.8417	8.10028	0	C380
382	1.27568	0.470184	-0.753009	0.328146	0.845247	-0.572874	0.284216	0.277628	-0.093852	-1.09364	-0.240822	-0.501718	0.231345	34	14.8311	-29.1112	0	C381
383	-1.35313	0.703011	0.290416	-0.363512	-0.437112	-0.13269	0.506534	1.84525	0.583902	0.14302	-1.09779	0.54041	-0.371477	13	47.1193	-27.3241	0	C382
384	1.57893	0.330392	-0.788867	-0.0369207	0.818337	-0.284392	0.277991	0.419908	-0.267484	-0.835028	-0.345912	-0.763876	0.396814	34	5.96487	-43.5873	0	C383
385	-0.946664	-0.691054	0.3284	0.156264	-0.927464	0.602025	0.449609	-0.350633	0.526799	1.16374	-0.957613	0.945323	0.422471	25	86.7609	13.7884	0	C384
386	1.86612	-0.192105	-0.41711	0.229657	0.281581	-0.17805	-0.00980725	0.172255	-0.24501	-0.864491	-0.386921	-0.546036	0.722169	27	-18.4473	-68.0167	0	C385
387	1.62806	-0.46806	-0.706358	-0.096652	-0.112736	-0.206842	0.171054	0.698059	-0.116767	-0.743352	-0.0635925	-0.154004	0.546393	28	-40.4018	-45.8982	0	C386
388	1.58275	-0.0750528	-0.585476	0.431439	0.418951	-0.266066	-0.0951038	0.179367	-0.384711	-0.892592	0.0617024	-0.515389	0.496799	2	-21.23	-53.2999	0	C387
389	0.603311	-0.0170274	-0.34972	-0.415122	0.192417	-0.400153	0.155346	0.970711	-0.42577	-0.294577	0.599928	-0.253451	-0.15992	21	-29.4527	10.5043	0	C388
390	-1.36467	-0.229256	3.2307	-0.318472	-0.200425	-0.620074	-0.115453	-0.0976191	1.45969	-0.440866	-0.448737	0.300485	-0.135489	35	16.7725	-82.0402	0	C389
391	-1.16824	0.42492	0.375486	1.19049	1.00858	0.238473	0.176915	-1.71006	-0.354	0.777164	1.09198	-0.0764507	-1.06491	1	-4.88599	80.0115	0	C390
392	-1.52846	-0.78819	1.10328	2.24348	-0.575201	-0.241166	0.37672	1.55922	0.148489	0.297261	-1.26091	0.466007	-0.306236	8	64.1518	-18.089	0	C391
393	-0.822186	0.0346031	1.72483	0.340881	-0.651546	0.0587129	-0.767659	1.81397	-0.00801923	0.0931219	-0.355132	0.106671	-0.619667	5	-43.1072	11.9768	0	C392
394	-0.758848	-0.16264	1.71308	0.306519	-1.20011	0.864518	-1.07931	0.410098	-0.191956	1.60147	-1.06176	0.627709	0.120093	17	-77.6155	-25.4333	0	C393
395	1.62518	-0.278407	0.174059	0.718598	0.0624227	-0.376469	-0.375054	0.899148	-0.944684	-0.751426	0.213573	-0.956744	0.576961	28	-37.3365	-62.1089	0	C394
396	-0.619348	0.379581	-0.243624	0.720177	0.766634	0.297941	-0.0190481	-1.25605	-0.535762	0.851903	0.944756	-0.0441251	-0.749567	1	-5.88672	72.131	0	C395
397	1.73199	-0.0494507	-0.653688	0.103615	0.294105	-0.357725	-0.145371	0.70044	-0.488663	-0.87018	0.0711316	-0.528092	0.617883	28	-28.2684	-52.6282	0	C396
398	1.20212	0.259507	-0.356342	0.019694	0.879254	-0.527346	0.239708	0.466336	-0.0948062	-0.879439	-0.659329	-0.393614	0.190112	34	5.96876	-27.8031	0	C397
399	1.6208	-0.0551862	-0.165412	0.766037	0.339046	-0.439425	-0.0460869	0.482777	-0.280445	-1.05814	-0.718899	-0.526535	0.549868	11	-5.19229	-60.8637	0	C398
400	-0.847496	-0.00585239	1.31372	-0.437065	-0.203868	-0.0775316	-0.2478	0.615397	1.42662	0.370648	-1.09327	0.0988578	-0.285836	23	29.1957	-61.9703	0	C399
401	0.918397	0.30367	-0.599861	0.0363866	0.889909	-0.529316	0.272603	0.60102	-0.240907	-0.662669	-0.0957924	-0.547208	-0.0480358	26	4.22453	-17.6039	0	C400
402	1.1761	-0.373597	-0.575853	-0.317745	0.138035	-0.28952	0.210158	0.634315	-0.0659781	-0.623436	-0.114257	0.0744479	0.375796	37	-35.1608	-11.0917	0	C401
403	1.76103	-0.284811	-0.0855744	0.753875	0.183994	-0.25864	-0.0267568	0.320646	-0.525139	-1.01489	-0.298052	-0.852496	0.845769	27	-17.6972	-57.2698	0	C402
404	1.93934	-0.481015	-0.593191	0.0900857	-0.142958	-0.122493	-0.251427	0.929302	-0.722611	-0.694195	0.22148	-0.452736	0.813014	28	-41.3625	-60.338	0	C403
405	1.86482	-0.626065	-0.402365	0.510113	-0.272904	-0.188256	-0.141275	0.517591	-0.335239	-0.961193	0.0158108	-0.307388	0.799749	28	-43.6525	-53.6395	0	C404
406	1.378	0.448543	-0.601484	0.021195	0.883087	-0.533345	0.342687	0.814921	-0.123986	-1.01028	-0.866124	-0.577242	0.377967	34	17.4797	-46.2257	0	C405
407	1.05395	0.520698	-0.573404	0.0318339	0.943883	-0.543226	0.205308	0.127048	-0.0405552	-0.86493	-0.0166824	-0.447381	-0.0715699	24	21.7562	-17.7846	0	C406
408	0.290311	0.956564	-0.363643	-0.220824	1.43299	-0.891085	0.568511	0.541476	0.0608786	-0.674194	-0.109273	-0.612086	-0.511549	20	12.4321	28.9039	0	C407
409	0.484936	0.92993	-0.920248	-0.349	1.31487	-0.59016	0.641037	0.109783	0.318825	-0.713046	-0.314498	-0.288607	-0.147045	19	20.6346	19.4963	0	C408
410	0.878346	-0.100603	-0.394933	0.0494995	0.520548	-0.3466	-0.00490976	0.826172	-0.294415	-0.526208	0.194459	-0.472421	-0.112858	37	-33.503	-2.60073	0	C409
411	-0.683494	-0.175216	1.01291	-0.322255	-0.363879	0.200193	-0.448977	1.18613	1.04366	0.610903	-1.0573	-0.0318719	-0.355057	23	34.0266	-57.5101	0	C410
412	-1.00074	-0.331942	0.903848	0.200444	-0.828032	0.506358	0.523331	-0.719164	0.586425	1.11807	-1.20275	0.93512	0.153286	25	88.4097	17.9428	0	C411
413	-0.827306	0.380882	1.10397	0.649067	-0.459877	-0.0309954	-0.558928	0.166409	0.152012	0.223598	-0.323711	-0.0804697	0.0644119	3	-47.6794	0.817031	0	C412
414	0.850839	0.501113	-0.556382	-0.235832	0.923246	-0.710355	0.533957	0.190683	0.0547073	-0.728764	-0.218731	-0.279808	0.00601623	12	9.72602	3.42393	0	C413
415	1.95808	-0.257326	-0.668921	0.545629	0.188191	-0.0564953	-0.120835	0.512937	-0.441418	-0.908496	-0.375384	-0.717475	0.900181	28	-29.4199	-67.6822	0	C414
416	1.09599	0.071328	-0.491023	-0.135409	0.797198	-0.501898	0.287766	0.191598	0.0256461	-0.845192	-0.0318064	-0.50239	0.336926	31	-6.90091	-16.3834	0	C415
417	-1.05837	0.479748	0.317699	-0.633607	0.850331	0.453907	0.088249	-2.23018	-0.0552781	0.999254	2.73105	0.171889	-0.69617	10	28.7249	61.4171	0	C416
418	1.03362	0.314607	-0.312777	-0.134789	0.693534	-0.371363	-0.0130607	0.636623	-0.578358	-0.637332	0.3232	-0.724517	0.0782206	37	-24.6461	-19.6555	0	C417
419	1.53335	-0.19849	-0.388324	0.487161	0.133638	-0.302881	-0.0708537	1.00185	-0.205376	-0.972947	0.107628	-0.870278	0.24986	28	-35.2336	-54.6037	0	C418
420	0.952831	0.270213	-0.592213	-0.411884	0.769935	-0.638383	0.347705	-0.0133348	0.0856937	-0.667571	0.102807	-0.12179	0.18566	12	6.06573	-2.22873	0	C419
421	-1.30991	-0.217896	3.09405	-0.18533	-0.353352	-0.770415	-0.0300922	0.102256	1.49598	-0.800158	-0.503913	0.44211	0.232975	35	17.0997	-80.3158	0	C420
422	0.808358	0.741483	-0.900456	-0.278019	1.22185	-0.506991	0.496144	0.454002	0.000503	-0.716869	-0.0467444	-0.659115	-0.125997	33	24.7566	6.11819	0	C421
423	1.16775	0.045869	-0.660151	-0.246497	0.566508	-0.32511	0.048065	0.569048	-0.369655	-0.611182	0.357193	-0.437277	0.194272	37	-29.5499	-17.7878	0	C422
424	0.802378	0.145599	-0.604616	-0.348557	0.664866	-0.338506	0.104625	0.164448	-0.148919	-0.435596	0.730413	-0.360556	-0.144883	21	-22.0712	3.83343	0	C423
425	-0.911836	0.419861	-0.271352	-0.0168014	1.06268	0.488984	0.191747	-1.52088	-0.656098	1.20387	1.1311	0.201504	-0.593643	1	6.84852	77.0678	0	C424
426	1.74568	-0.243914	-0.412589	0.0624562	0.519661	-0.28824	0.116068	0.792159	-0.409836	-0.840325	-0.523591	-0.653475	0.607592	27	-14.7529	-62.969	0	C425
427	-1.14736	-0.50642	0.0871152	0.740229	-0.979551	0.633161	0.183786	0.312331	0.338414	0.937611	-0.440934	0.593366	-0.192083	38	67.5904	15.5753	0	C426
428	0.990878	0.0336971	-0.52848	0.699641	0.500479	-0.547152	0.179517	0.49111	-0.0241387	-0.867614	-0.248021	-0.387508	0.024632	2	-12.5105	-45.94	0	C427
429	1.37178	0.0240735	-0.594029	-0.183175	0.640114	-0.386873	0.0853567	0.904296	-0.431825	-0.836689	0.119635	-0.585986	0.272791	37	-35.2136	-22.2672	0	C428
430	0.841949	0.227305	-0.712843	-0.235763	0.622818	-0.210709	0.21085	1.22547	-0.313619	-0.43669	-0.0114834	-0.733788	-0.0978186	21	-30.2249	6.11069	0	C429
431	0.959792	0.0403809	-0.56905	0.339744	0.496784	-0.570565	0.064303	0.904806	-0.2106	-0.816033	0.00783345	-0.402781	0.0461375	37	-37.0247	-17.8336	0	C430
432	0.890817	-0.352853	-0.79448	-0.322842	0.284148	-0.442153	0.651394	0.564837	0.111421	-0.468862	-0.223795	0.390862	0.0294677	21	-23.3381	-2.17402	0	C431
433	-0.877773	0.315364	1.80675	0.599723	-0.933715	0.342772	-1.06658	0.181909	-0.37713	1.21086	-0.440014	0.503345	-0.202228	3	-55.2294	9.65926	0	C432
434	-0.724025	0.587897	-0.539756	0.159214	1.02672	-0.0113868	0.158069	-0.368157	-0.556883	0.571414	1.41418	-0.337422	-0.925769	4	-5.35458	62.7476	0	C433
435	1.41318	-0.000155	-0.850598	-0.161649	0.54485	-0.427362	0.142095	-0.0585709	-0.208431	-0.786139	0.687364	-0.3259	0.427382	37	-22.8995	-23.7132	0	C434
436	-0.827394	0.295564	-0.0401081	-0.687389	-1.12947	1.37579	-1.25255	-0.575821	-0.647778	2.19963	1.64963	0.81379	0.10671	32	-32.6742	58.2746	0	C435
437	1.79416	-0.57423	-0.325453	0.455437	-0.250663	-0.272289	-0.0519612	0.307311	-0.0863691	-0.886278	-0.181193	-0.400806	0.908241	27	-26.344	-66.0146	0	C436
438	0.718634	0.410913	-0.853359	-0.368439	0.973889	-0.424614	0.476096	0.183987	-0.000796	-0.593208	0.289306	-0.424568	-0.0536186	12	3.30651	1.06924	0	C437
439	-0.296861	0.647356	-0.377471	0.462634	1.00995	-0.288445	0.124235	0.00165923	-0.429938	0.154112	0.658126	-0.468436	-0.908757	4	-6.88265	50.768	0	C438
440	1.24597	0.40478	-0.468083	0.00184607	1.09218	-0.473874	0.40845	0.297477	-0.154809	-1.09708	-0.345554	-0.592745	0.116439	24	26.4103	-29.0141	0	C439
441	1.89863	-0.233556	-0.296014	0.976449	-0.0363828	-0.118952	-0.091501	0.151217	-0.375624	-1.18707	-0.621829	-0.386251	0.899775	27	-21.1078	-64.943	0	C440
442	-0.66342	-0.661694	0.606061	-0.554182	-1.29799	1.78355	-1.07842	-1.66972	-0.537039	2.58803	2.13463	1.24808	0.132707	32	-38.8859	57.1317	0	C441
443	0.761167	0.530788	-0.63804	-0.370236	0.964411	-0.542085	0.315313	0.259816	-0.19378	-0.483254	0.508628	-0.53442	-0.253495	9	-4.91184	15.6005	0	C442
444	0.942975	0.588232	-0.517807	0.103726	0.979259	-0.557891	0.345664	0.586836	-0.167972	-0.857152	-0.386294	-0.655292	-0.0267403	33	28.5286	-8.75456	0	C443
445	0.937083	-0.0420536	-0.34059	-0.330662	0.576879	-0.488223	0.253294	0.679324	0.124244	-0.617941	-0.530628	-0.101754	0.116806	31	-11.3454	-11.5438	0	C444
446	1.13878	0.04195	-0.757401	-0.199942	0.549066	-0.396199	0.15119	0.433164	-0.265272	-0.623739	0.139315	-0.263618	0.335435	37	-21.4424	-12.3447	0	C445
447	1.24154	0.147078	-0.627632	-0.000779	0.667603	-0.33061	0.251857	0.577925	-0.253107	-0.654697	-0.477559	-0.467695	0.240506	34	4.82496	-27.8976	0	C446
448	1.08883	-0.142574	-0.48676	-0.0854809	0.155266	-0.522103	0.346006	0.234437	0.0291394	-0.649852	0.235172	-0.074937	0.0796379	37	-32.9977	-10.3497	0	C447
449	-0.423084	-0.803736	1.38038	-0.308128	-1.4066	1.38297	-1.03116	-0.0959696	-0.236862	1.81258	-1.08956	0.788967	1.38187	17	-72.7946	-28.6199	0	C448
450	0.661934	0.403679	-0.462375	-0.499206	1.01963	-0.577937	0.551986	0.533649	-0.0853554	-0.592563	-0.236757	-0.317634	-0.0900706	12	6.39792	14.0303	0	C449
451	0.301383	0.565932	0.114285	-0.587585	-0.987878	2.80809	-1.08581	-1.99834	-0.548812	2.80091	-1.37197	1.48115	0.968242	36	-63.6416	46.2086	0	C450
452	-0.875561	-0.40561	1.13759	0.36648	-1.10804	0.933128	-0.994721	-0.488902	0.275087	1.60105	-0.283513	0.540084	0.117857	17	-78.236	-13.9989	0	C451
453	1.2266	0.0787343	-0.740883	0.587622	0.693887	-0.522322	0.22506	0.41229	-0.177929	-0.8489	-0.205177	-0.491077	0.154027	15	-0.394869	-27.0032	0	C452
454	-0.994232	0.681961	-0.156906	-0.322145	1.30959	0.323721	0.505987	-1.91309	-0.156937	1.01492	1.65483	0.00500979	-0.828268	7	11.3893	74.5842	0	C453
455	1.28918	0.455012	-0.994786	-0.0400115	1.02913	-0.293814	0.367719	0.221199	-0.00176491	-0.878283	-0.553355	-0.383134	0.26141	34	15.9243	-40.8781	0	C454
456	0.394339	0.224172	-0.639373	-0.277069	0.429303	-0.589406	0.197074	1.30672	-0.0067042	-0.373853	0.926075	-0.583744	-0.595035	9	-22.3734	20.95	0	C455
457	0.851106	0.469522	-0.430031	-0.283042	0.965826	-0.620717	0.366852	0.146032	-0.0502314	-0.622285	-0.206337	-0.39118	0.0813412	33	14.9676	-4.83068	0	C456
458	0.443867	0.586859	-0.692708	-0.471017	1.06535	-0.609086	0.617429	0.446855	0.201677	-0.909437	0.298102	-0.229414	-0.349266	9	-6.60077	19.4488	0	C457
459	-0.975328	-0.899628	0.674326	-0.492193	-1.09461	1.03516	-0.779408	-0.552251	-0.318488	1.74146	2.12469	0.858804	-0.171618	32	-29.869	61.4062	0	C458
460	-1.094	-0.517037	0.100071	0.481288	-0.706383	0.252686	0.529221	0.570863	0.376823	0.807431	-1.00052	0.63487	0.198768	38	66.1007	5.86963	0	C459
461	0.677369	0.598331	-0.630146	-0.309569	1.12234	-0.652733	0.472728	0.430306	0.13406	-0.494031	-0.0907318	-0.457678	-0.437886	20	9.09071	20.6995	0	C460
462	-1.19423	-0.281048	1.96851	-0.207613	-0.283401	-0.144634	-0.19756	0.681473	1.39462	0.184581	-0.966026	0.064637	-0.179438	23	29.8739	-64.8499	0	C461
463	1.46311	0.00973138	-0.594574	0.0137179	0.349085	-0.259096	0.0437732	0.539864	-0.0635592	-0.981198	-0.194779	-0.388885	0.410397	15	-7.22131	-39.9538	0	C462
464	-1.15627	-0.471412	0.665379	0.942003	-0.9449	0.128906	0.668351	-0.365537	0.873558	0.575914	-1.1587	0.837127	0.288517	25	77.6474	18.9056	0	C463
465	1.38999	-0.0131891	-0.55759	0.503822	0.395201	-0.274098	-0.0121788	0.704989	-0.407196	-0.983393	-0.124585	-0.652117	0.422594	27	-13.5191	-55.3087	0	C464
466	1.29937	-0.185416	-0.323748	-0.289245	0.29534	-0.304978	0.14509	0.565885	-0.209095	-0.925825	-0.0745473	-0.185558	0.473757	18	-29.9216	-39.9594	0	C465
467	2.08081	-0.555346	-0.576715	0.499481	-0.124876	0.045224	-0.0224744	0.0429487	-0.242069	-0.857098	-0.48886	-0.190914	0.917548	27	-27.9227	-71.8584	0	C466
468	-0.1572	-0.006362	0.259524	-0.467817	-0.87418	2.19669	-0.761225	-1.99451	-0.262735	2.26841	-0.252384	1.07215	0.523269	36	-54.0168	42.7018	0	C467
469	-0.936806	0.855175	-0.320528	-0.65367	1.39194	0.456241	0.478065	-1.99175	-0.0134035	1.16431	1.16724	0.171407	-0.667688	7	17.1991	77.3771	0	C468
470	-1.18578	-0.0262002	-0.145819	0.466394	0.387905	0.495374	-0.185195	-1.30771	-0.619189	1.14739	2.54619	0.118431	-0.737091	1	6.12414	63.1862	0	C469
471	-0.387102	-0.956508	1.48533	2.92124	-0.908067	-0.336864	-0.670645	1.22996	-0.631162	0.0689334	0.55937	-0.574465	-0.524021	22	35.472	35.4418	0	C470
472	1.94056	-0.301131	-0.539377	0.461104	0.0477124	-0.231799	-0.146201	0.34101	-0.315651	-0.907784	0.037174	-0.621204	0.699133	28	-29.3623	-63.6206	0	C471
473	0.268554	0.467932	-0.577364	-0.167966	1.15605	-0.801725	0.57059	0.900133	0.26315	-0.549893	-0.146445	-0.320917	-0.651302	20	2.82318	24.6279	0	C472
474	0.898801	0.530343	-0.709623	0.118746	1.09535	-0.431809	0.614085	0.253435	0.126112	-0.872269	-0.961434	-0.324117	0.12863	24	33.3124	-23.4053	0	C473
475	0.231877	-0.345053	-0.177242	0.676141	0.0713153	0.160381	-0.52019	0.447493	-0.911706	0.467216	1.01168	-0.422485	-0.40011	4	-15.7294	55.2941	0	C474
476	-0.472926	-0.124351	0.10427	-0.839053	-1.36067	1.96613	-1.24845	-1.34899	-0.0498482	1.70646	2.51686	0.473401	0.320732	5	-39.5732	27.9569	0	C475
477	0.0322767	0.378865	0.126605	-0.335057	-0.894414	2.5191	-1.38119	-0.779217	-0.702427	2.52389	-1.4585	1.06744	0.804512	36	-65.6795	41.7632	0	C476
478	0.592255	0.866913	-0.671997	-0.362038	1.39789	-0.759595	0.52872	0.442346	-0.0250632	-0.815052	0.367438	-0.770349	-0.268069	20	8.80672	23.0594	0	C477
479	-1.70268	-0.872588	0.626478	1.06741	-0.963989	-0.0870231	0.355768	1.19319	0.271822	0.448292	0.791902	0.333099	-0.382642	22	43.181	24.404	0	C478
480	-0.40819	0.193406	-0.331322	-0.423464	0.558332	0.0775718	-0.126111	0.485586	-0.707402	0.626395	1.26356	-0.232665	-0.660924	4	-9.19078	58.5235	0	C479
481	0.943888	0.0812164	-0.601089	-0.223362	0.590703	-0.592149	0.515699	0.447997	0.0210323	-0.817009	-0.00344705	-0.11227	0.0386308	31	-6.76074	-4.76309	0	C480
482	-0.42897	-0.545465	0.0474574	0.818895	-1.02185	-0.0728132	0.276099	-0.0731003	0.180067	0.342815	0.73909	0.338728	-0.235699	14	56.3536	32.4974	0	C481
483	1.30507	-0.10324	-0.534941	-0.0543264	0.498321	-0.461199	0.0290108	0.894976	-0.393025	-0.773191	0.173603	-0.477544	0.24241	37	-36.3392	-21.1455	0	C482
484	1.27371	0.300519	-1.56278	0.44986	1.01173	-0.566404	0.672188	0.313306	0.0777955	-0.861115	-0.316946	-0.144482	0.393063	34	14.109	-39.4491	0	C483
485	1.10146	-0.14973	-0.343171	-0.0829427	0.320216	-0.381697	-0.0361206	0.159775	-0.0963907	-0.689115	0.508778	-0.361547	0.25004	37	-28.3455	-11.8759	0	C484
486	2.17008	-0.155672	-0.828978	0.339231	0.123664	0.0312133	-0.255285	0.24017	-0.722621	-0.75725	0.467109	-0.905154	0.929724	28	-34.2084	-61.1296	0	C485
487	1.86052	-0.227013	-0.691084	0.115798	0.262769	-0.211068	0.0887534	0.137259	-0.228864	-0.988046	-0.177874	-0.305186	0.806102	27	-15.6602	-69.02	0	C486
488	1.41433	0.125083	-0.782618	0.127295	0.603437	-0.177309	0.0538941	0.308926	-0.471027	-0.835183	0.334362	-0.610352	0.307416	2	-22.0744	-44.4917	0	C487
489	1.55017	0.297963	-0.418712	0.252876	0.782441	-0.320371	0.141972	-0.0315883	-0.285349	-1.04987	-0.34498	-0.61673	0.439833	11	2.11248	-54.187	0	C488
490	1.08727	0.252562	-1.29425	0.0425472	0.875808	-0.41645	0.478447	0.232899	-0.0851805	-0.607388	0.12977	-0.319218	0.188872	26	-0.706119	-11.3122	0	C489
491	0.699697	0.608005	-0.679643	0.377742	0.898684	-0.671573	0.371561	0.284665	-0.215944	-0.909893	0.478994	-0.539508	-0.300725	12	-1.83337	11.6748	0	C490
492	1.49329	-0.131918	-0.416572	0.530496	0.259713	-0.324429	-0.000122	0.656625	-0.402083	-1.00035	-0.264808	-0.454673	0.437723	27	-13.0353	-54.4336	0	C491
493	1.02913	0.52105	-0.358785	0.305273	1.04327	-0.70058	0.397335	0.0653081	-0.0401452	-1.05998	-0.468239	-0.420669	0.0719093	24	23.8061	-19.0739	0	C492
494	1.01795	-0.0836678	-0.661346	0.0703302	0.390299	-0.402926	0.311075	0.408473	0.0292225	-0.70982	-0.0109221	-0.234791	0.111974	15	-13.3572	-20.3053	0	C493
495	-1.05684	-0.33368	2.7558	-0.221822	-0.265619	-0.524768	-0.245611	0.14845	1.46332	-0.271704	-1.03338	0.517417	0.144122	35	17.4718	-73.9304	0	C494
496	0.755226	0.448145	-0.316623	-0.397814	0.954465	-0.442297	0.171378	-0.110955	-0.21366	-0.376363	0.40682	-0.584721	-0.0609083	26	2.21211	-4.90013	0	C495
497	0.999965	0.512033	-0.799617	0.00501174	0.944643	-0.563552	0.325436	0.0680117	-0.169534	-0.830664	0.128359	-0.362227	0.101523	26	1.53363	-9.3879	0	C496
498	-0.906814	-0.191325	1.38081	-0.118965	-0.419192	-0.103317	-0.191971	1.6102	1.18736	0.384617	-1.06229	0.00751541	-0.769345	23	35.7791	-59.232	0	C497
499	-1.01788	0.414543	-0.460555	0.339988	1.02486	0.403584	0.153845	-1.36499	-0.409373	0.947348	1.4478	-0.0245942	-0.781472	1	1.47029	70.3758	0	C498
500	1.93688	-0.741326	-0.351345	0.226981	-0.0754945	-0.235501	-0.223869	0.840928	-0.283597	-0.610263	-0.44845	-0.381782	0.858589	27	-25.6614	-69.0838	0	C499
501	-0.896932	1.43605	0.159507	-0.56682	1.85196	-0.0391878	0.831535	-2.55385	0.132311	0.54527	2.03322	-0.147357	-1.00006	7	24.7351	79.5771	0	C500
502	-0.637123	-0.0905559	0.638497	-0.564156	-1.09488	1.74834	-0.549616	-2.07287	0.0205832	1.89582	0.80408	1.05903	0.461275	36	-47.7488	42.3278	0	C501
503	-1.08804	-0.217681	3.31994	-0.225789	-0.486498	-0.688003	-0.231117	-0.365318	1.4209	-0.6434	-0.683237	0.679224	0.404214	35	10.1284	-82.0013	0	C502
504	1.2994	0.417069	-0.922698	0.141284	0.842856	-0.483409	0.407347	0.28645	0.250839	-1.04216	-0.703178	-0.176973	0.178664	24	32.3969	-27.9416	0	C503
505	1.31732	0.155329	-0.344341	0.160223	0.572289	-0.470436	0.153862	0.50446	-0.285647	-0.978391	-0.265994	-0.556208	0.364831	15	-3.12621	-32.3575	0	C504
506	0.989884	0.97581	-0.592174	-0.131452	1.55192	-0.689688	0.678504	-0.300331	0.136166	-0.883453	-0.552418	-0.56947	-0.0306803	19	26.9817	12.3327	0	C505
507	1.48052	-0.321003	-0.793916	0.0672844	0.135986	-0.47163	0.288346	0.190543	0.216371	-0.779619	-0.224937	0.0780737	0.475122	15	-17.1492	-32.9871	0	C506
508	-1.20013	-0.573718	0.421641	0.487747	-0.853415	-0.120925	0.485984	1.81436	0.182482	0.584882	-0.759328	0.645087	-0.279784	8	54.8692	-8.72617	0	C507
509	1.08227	0.0487574	-0.334221	-0.248221	0.419554	-0.590049	0.03158	0.468395	-0.249951	-0.526112	0.427501	-0.47847	0.186638	37	-26.7949	-11.6297	0	C508
510	0.273894	-0.938074	0.127911	0.724973	-0.910311	0.0156999	0.195731	-0.77634	-0.0245849	0.395089	1.08741	0.338917	-0.0335974	14	57.6911	37.4852	0	C509
511	-0.105862	0.532531	0.336294	-0.788016	-0.590883	2.25125	-1.02841	-1.61146	1.04756	2.00449	-1.63691	0.857167	0.545043	6	-64.7564	20.3572	0	C510
512	-1.15556	-0.558889	0.326925	0.676659	-1.00465	0.224313	0.519382	-0.253366	0.422968	0.619239	-0.328097	0.714234	0.385248	14	64.0094	21.6009	0	C511
513	1.63291	-0.757427	-0.289636	0.46831	-0.284904	-0.0372046	-0.3816	0.599111	-0.460543	-0.69273	0.453215	-0.480472	0.691179	28	-41.6114	-55.0617	0	C512
514	2.00345	-0.425264	-0.417149	0.332099	-0.125014	0.0463215	0.00137452	0.332592	-0.282778	-1.04111	-0.369159	-0.486309	0.93111	27	-27.8572	-70.5586	0	C513
515	1.16549	0.39462	-0.833999	-0.266975	0.786506	-0.393262	0.382767	0.00578769	0.171953	-0.881814	0.0429527	-0.347369	0.142916	26	7.55219	-5.11737	0	C514
516	-0.931229	-0.635054	0.172618	0.369571	-0.954834	0.601449	0.555927	-0.350059	0.246705	1.02425	-0.982972	0.931446	0.650535	25	87.0991	12.0402	0	C515
517	1.44157	0.117486	-1.03089	0.0577313	0.623092	-0.250683	0.27162	0.113541	-0.0413761	-1.06758	0.15461	-0.381178	0.469824	11	-0.27513	-50.3425	0	C516
518	-0.50782	-0.22458	2.04769	-0.259222	-1.15367	0.663466	-0.619165	-0.525809	0.519943	1.24234	-0.810532	0.434343	0.0763079	17	-65.8404	-18.0442	0	C517
519	0.835796	0.635496	-0.5828	-0.409374	1.16993	-0.475545	0.460807	0.254972	-0.0575513	-0.656235	-0.279464	-0.571763	0.0392309	33	23.8687	3.74932	0	C518
520	-1.11149	-0.635404	0.525864	-0.647969	-1.42325	0.934894	-1.16371	0.596729	-0.759151	1.8763	2.7911	0.631925	0.06669	32	-27.6135	71.2966	0	C519
521	0.722955	0.255922	-0.493665	0.0105005	0.908989	-0.667383	0.284304	0.585298	0.00574983	-0.786297	-0.012751	-0.411661	-0.119485	12	-4.94261	6.92224	0	C520
522	-0.508798	0.517891	-0.408986	0.0686279	0.823204	0.0285683	0.0260911	-0.109104	-0.55699	0.443445	1.19936	-0.416006	-0.814546	4	-6.99904	55.2492	0	C521
523	1.51904	-0.20522	-0.292337	0.547489	0.19111	-0.338915	-0.253541	0.637477	-0.574604	-0.987215	0.413314	-0.666428	0.440476	28	-35.8414	-55.3269	0	C522
524	0.742575	0.121234	-0.40609	-0.43448	0.46391	-0.508186	0.354802	0.539348	0.252293	-0.729179	0.237234	-0.162832	-0.241553	21	-16.959	6.03721	0	C523
525	0.132518	0.370096	-0.327152	-0.570144	0.640642	-0.455574	0.360637	1.08453	-0.0529406	-0.401256	0.842959	-0.491182	-0.774384	9	-20.214	24.7431	0	C524
526	-1.25973	0.231433	0.0705734	0.65756	0.642968	0.229817	-0.107997	-1.06878	-0.403345	0.776888	2.18694	-0.237245	-0.929183	1	-1.13695	68.6961	0	C525
527	0.0721465	0.311478	-0.324836	-0.642357	-1.18517	2.60468	-1.01588	-1.49451	-0.600079	2.40465	-0.57303	1.31748	0.86393	36	-59.2925	45.5962	0	C526
528	0.014562	0.95641	-0.733853	-0.52673	1.4244	-0.729993	0.701055	-0.414068	0.373358	-0.53288	0.383206	-0.034778	-0.435451	20	10.0991	39.7072	0	C527
529	0.109701	0.654022	0.103178	-0.731907	-0.798781	2.55554	-1.34078	-2.1157	-0.632526	1.98043	0.581328	0.774541	0.825047	36	-52.0786	48.9853	0	C528
530	1.22704	0.0628586	-0.631861	-0.126412	0.563562	-0.403445	0.205155	0.504242	-0.0906606	-0.936141	0.255056	-0.464328	0.197668	15	-15.8912	-22.1684	0	C529
531	0.410304	0.374204	-0.385031	-0.614315	1.0501	-0.691261	0.434184	0.763864	0.00913905	-0.545347	0.0961128	-0.302716	-0.279384	9	-10.1811	18.0435	0	C530
532	0.88432	0.346712	-0.568655	-0.343939	1.02846	-0.497472	0.50225	0.371502	-0.326872	-0.551833	-0.155526	-0.386962	0.00229963	12	6.06332	4.61652	0	C531
533	1.37987	0.273006	-0.789798	-0.184517	0.757345	-0.440686	0.359123	0.284396	-0.214281	-1.04172	0.368893	-0.56944	0.304285	15	-6.88863	-26.4148	0	C532
534	1.23467	-0.226534	-0.419899	-0.117529	0.31398	-0.539572	0.0706747	0.576179	-0.278127	-0.542125	0.284126	-0.263721	0.147574	37	-33.082	-14.5008	0	C533
535	-1.25636	-0.59975	0.788889	1.84381	-0.619814	-0.141057	0.155671	0.902137	0.200457	0.42248	-1.00499	0.401445	-0.137386	8	64.8415	-14.2405	0	C534
536	1.29658	-0.0733537	-0.608458	-0.122237	0.698036	-0.180259	0.163202	0.465064	-0.220169	-0.680001	0.132999	-0.640763	0.0844079	37	-26.1781	-19.6598	0	C535
537	1.50599	0.317932	-0.823113	-0.101972	0.711503	-0.418839	0.189267	0.236398	-0.27325	-0.836162	0.127687	-0.627703	0.422327	15	-6.79987	-26.9121	0	C536
538	1.3096	0.1136	-0.587775	0.0630066	0.589803	-0.431096	0.0794114	0.297967	-0.193791	-0.873632	-0.0119587	-0.40498	0.350429	15	-5.1412	-30.2053	0	C537
539	0.622891	0.361985	-0.114077	0.021064	0.779586	-0.748301	0.298633	0.79522	-0.0154125	-0.744327	-0.196598	-0.541553	-0.232307	33	19.166	-11.498	0	C538
540	-0.0104947	0.737031	-0.462955	-0.137304	1.34268	-0.627023	0.455442	0.563432	-0.0294778	-0.161729	-0.0221334	-0.617659	-0.67818	4	-2.5875	40.8742	0	C539
541	1.63808	0.188953	-0.704725	0.0284585	0.69283	-0.3693	0.0975691	-0.492039	-0.312325	-0.755851	0.225312	-0.403125	0.560758	11	1.65058	-52.0319	0	C540
542	0.793563	0.32306	-0.522989	0.125219	0.780269	-0.565873	0.270912	0.177951	0.076714	-0.757405	-0.124483	-0.319736	-0.016531	24	15.707	-16.7549	0	C541
543	0.570329	0.0585588	-0.390409	-0.482041	0.664896	-0.607349	0.359923	0.506099	0.106404	-0.580967	0.397474	-0.202644	-0.17438	21	-18.6059	9.39103	0	C542
544	0.157488	0.355449	-0.306321	-0.322472	0.989873	-0.426925	0.374026	0.469839	-0.287815	-0.386995	0.424157	-0.444179	-0.372797	9	-14.1339	23.5084	0	C543
545	-0.974065	-0.521416	0.408383	-0.659181	-1.63034	1.01512	-1.10133	1.02839	-0.732289	1.83688	2.50753	0.703669	-0.234605	32	-24.0658	72.0902	0	C544
546	-1.33824	-0.406513	3.48753	-0.361789	-0.277304	-0.772795	-0.0964451	-0.250654	1.52323	-0.895383	-0.222755	0.67645	0.259774	35	12.9211	-86.3428	0	C545
547	2.28329	-0.578189	-0.304416	0.826188	-0.187777	0.0629209	-0.21031	0.517778	-0.424628	-1.19521	-0.579251	-0.629649	1.16781	28	-37.9006	-69.2041	0	C546
548	1.64703	0.115228	-0.852822	0.336906	0.671719	-0.252905	0.151148	0.0750789	-0.0863482	-1.00321	-0.503745	-0.509489	0.714297	11	4.05451	-58.4787	0	C547
549	1.34562	-0.362626	-0.430899	-0.0686899	0.14033	-0.528765	0.282211	1.00187	-0.128822	-0.882313	-0.0599466	-0.28984	0.342891	18	-31.4209	-40.4081	0	C548
550	1.03461	0.795756	-0.653649	0.169856	1.20643	-0.482043	0.490541	0.329865	-0.177132	-0.875758	-0.504141	-0.787392	-0.0277322	33	32.3999	-9.60698	0	C549
551	-1.33629	-0.489299	1.05161	0.623691	-1.11165	0.166014	0.238718	1.43572	0.473847	0.70811	-1.19655	0.745896	-0.249002	8	60.4046	-10.7135	0	C550
552	-1.24812	0.628962	0.0895563	0.564583	1.06622	0.342315	0.0494687	-1.50645	-0.354991	0.792982	1.53544	-0.0615137	-1.14016	1	-0.756387	77.8269	0	C551
553	-0.38307	-0.0608899	0.109284	-0.315838	-0.873628	2.11966	-1.05691	-1.81553	-0.331231	2.19485	0.523146	0.900915	0.558533	36	-49.8176	43.8801	0	C552
554	1.49758	-0.183328	-0.453506	0.400093	0.402206	-0.365461	0.0924258	0.225213	-0.198123	-1.03401	-0.120803	-0.355892	0.438195	2	-9.72708	-50.1398	0	C553
555	0.54863	0.406451	-0.661364	-0.385203	0.95257	-0.578002	0.591391	0.136178	0.138145	-0.589453	0.165979	-0.121845	-0.309249	9	-2.64293	19.6846	0	C554
556	1.18102	-0.250405	-0.594642	-0.189827	0.370162	-0.344702	0.316942	-0.0190546	0.0823156	-0.589791	0.170652	-0.165955	0.258153	15	-19.9125	-23.7948	0	C555
557	1.1054	0.0916587	-0.312663	0.244281	0.716687	-0.625269	0.227459	0.436119	-0.211295	-0.88759	0.0543697	-0.679772	0.144387	15	-1.37124	-24.2198	0	C556
558	-0.755201	-0.852343	0.742578	-0.573205	-1.55912	1.04713	-1.40575	0.404443	-1.00886	1.58564	2.57806	0.553068	1.04351	32	-27.374	68.9527	0	C557
559	1.25412	0.0947016	-0.547924	0.0927768	0.709756	-0.26748	0.250163	-0.153192	-0.103321	-0.893494	-0.0263572	-0.362188	0.231954	34	14.8737	-35.3553	0	C558
560	0.994699	0.549443	-0.612248	-0.00824082	1.06326	-0.45107	0.435195	-0.0819219	0.140671	-0.92122	-0.300494	-0.407564	-0.0409525	24	27.3303	-19.3792	0	C559
561	1.55987	-0.191251	-0.393227	0.200081	0.289694	-0.280894	0.137433	0.582092	-0.374564	-0.995784	-0.126764	-0.489823	0.445236	2	-26.7222	-46.2423	0	C560
562	1.63545	-0.0776092	-0.740286	0.0840071	0.211446	-0.239652	0.294388	0.323986	-0.111512	-0.727529	-0.686459	-0.141633	0.569714	27	-9.7545	-66.9621	0	C561
563	-0.506928	-0.202388	0.305234	-0.904125	-1.56732	1.94525	-1.44058	-0.849962	-0.784119	1.85165	3.24913	0.642868	0.264616	30	-35.2127	37.5955	0	C562
564	1.29874	0.102844	-0.289979	-0.034931	0.665303	-0.488211	0.127149	-0.00586974	-0.113437	-0.912946	0.0739586	-0.410178	0.263497	15	-9.43509	-23.7383	0	C563
565	0.36499	1.17601	-1.08297	-0.260665	1.51004	-0.484343	0.624315	-0.0660628	-0.00467271	-0.296372	0.0870907	-0.611956	-0.414009	20	21.6247	30.0205	0	C564
566	-1.14973	-0.360386	2.33692	-0.152323	-0.457716	-0.587032	-0.00989467	0.549852	1.42827	-0.356104	-1.04613	0.736069	0.151119	35	23.08	-71.0236	0	C565
567	-0.910268	-0.273176	2.07679	-0.121885	-0.202576	-0.255748	-0.168241	0.328435	1.44213	-0.215868	-0.841039	0.257403	-0.368866	23	25.0188	-66.8335	0	C566
568	1.38326	0.0989042	-0.597336	-0.00869793	0.551454	-0.289253	0.0958744	-0.0401534	-0.152779	-1.00799	0.221865	-0.422657	0.499197	11	0.413175	-51.0279	0	C567
569	-1.21627	-0.347286	0.994312	-0.0581442	-0.486784	0.0772879	-0.161577	1.03509	1.36324	0.470329	-0.994718	0.300002	-0.247569	23	34.0538	-59.1959	0	C568
570	0.891001	-0.145196	-0.777821	-0.152762	0.653786	-0.321684	0.331377	0.562682	-0.0917192	-0.456853	0.116087	-0.303465	-0.0260633	37	-27.3818	-6.1042	0	C569
571	-0.936693	0.149687	1.6478	0.825968	-0.609236	0.450334	-0.967826	-0.197934	-0.0379513	0.873401	-0.478918	-0.0379278	0.137625	3	-53.6104	0.278421	0	C570
572	1.49642	-0.114678	-0.885601	-0.121737	0.23129	-0.21194	0.0586808	0.403151	-0.0507501	-0.831076	0.364965	-0.429209	0.498886	18	-29.9285	-35.9868	0	C571
573	-0.839475	-1.28293	2.68617	4.66054	0.23421	-0.281851	-0.23907	-1.52572	-0.198803	0.0635504	0.705921	-0.619341	-0.973665	30	-21.3901	44.8357	0	C572
574	1.18815	0.113504	-0.445663	-0.20927	0.561786	-0.316615	0.303194	0.451455	0.0778329	-0.808389	-0.650331	-0.25692	0.283782	34	5.08078	-30.5724	0	C573
575	-0.773509	-0.462851	2.72033	-0.243628	-0.448687	-0.14826	-0.406091	0.0202865	1.15154	-0.0678616	-0.775115	0.448617	-0.155141	35	18.1626	-68.5061	0	C574
576	-0.601573	0.109479	0.752999	-0.965779	-1.36833	1.75187	-1.35866	-1.3261	0.238191	1.2571	2.37173	0.367378	0.269565	5	-41.6696	29.7194	0	C575
577	-1.20227	-0.495991	3.27912	-0.359697	-0.333852	-0.3521	-0.100001	-0.324247	1.38242	-0.606627	-0.713715	0.661033	0.33271	35	9.91702	-82.1415	0	C576
578	-0.274874	-0.136108	0.513688	-0.539306	-1.38918	1.98524	-1.26215	-2.08385	-0.692805	2.04675	3.24114	0.858081	0.332299	30	-31.5587	42.1979	0	C577
579	0.246867	0.217456	-0.432506	-0.0222306	0.74337	-0.692165	0.455002	0.531776	0.152293	-0.774877	0.204083	-0.168501	-0.218627	9	-11.2834	10.2855	0	C578
580	0.999436	0.285412	-0.68556	-0.0594226	0.831975	-0.538244	0.343177	0.0209963	0.0292491	-0.775677	-0.0507541	-0.181171	0.0610889	26	9.10455	-9.04924	0	C579
581	0.734061	0.574936	-0.760082	-0.210892	1.1308	-0.587263	0.583687	0.149931	0.150965	-0.796819	-0.453302	-0.203507	0.0695332	33	21.0415	-0.19098	0	C580
582	1.49413	0.0806124	-0.506539	0.563283	0.611628	-0.27109	0.218659	-0.313562	-0.0827352	-1.02533	-0.452856	-0.448953	0.527524	11	2.36779	-55.6693	0	C581
583	1.09703	0.175009	-0.454879	-0.342684	0.635282	-0.464833	0.175094	0.523813	-0.104882	-0.848363	0.211145	-0.414997	0.103576	37	-25.2155	-14.9358	0	C582
584	-0.768337	0.735533	-0.420215	-0.464207	1.1573	0.21158	0.231944	-0.685709	-0.297079	0.739886	0.982257	-0.130212	-0.862536	4	-2.5434	61.6565	0	C583
585	-1.17509	-0.459258	3.30399	-0.367536	-0.238763	-0.584886	-0.0340335	-0.270487	1.36134	-0.72942	-0.679959	0.687763	0.392862	35	10.3277	-82.6083	0	C584
586	1.47451	-0.0208173	-0.386718	0.0121286	0.314045	-0.287694	0.201271	0.132313	-0.426028	-0.974676	0.232581	-0.36913	0.419361	2	-21.1878	-39.3703	0	C585
587	0.935381	0.27116	-0.602329	-0.224105	0.709347	-0.488877	0.112705	0.626701	-0.290071	-0.689525	0.247382	-0.351831	0.0256647	21	-23.6748	0.69305	0	C586
588	-0.0156999	-0.431779	-0.0876898	0.502832	-0.0867663	0.253109	-0.685085	0.601544	-1.05371	0.706091	1.34938	-0.136051	-0.515884	4	-15.3173	56.222	0	C587
589	-0.305723	-0.041444	0.160728	-0.504369	-0.767417	2.02888	-1.11585	-2.17119	-0.431941	2.15864	1.63164	0.877606	0.398288	30	-40.7224	46.3018	0	C588
590	0.946874	0.0432256	-0.652353	0.12175	0.572637	-0.517317	0.441288	0.179917	-0.0924333	-0.732673	-0.121846	-0.0919257	0.146415	15	-10.8267	-17.7777	0	C589
591	-1.53479	-0.779728	0.769649	0.543069	-0.92694	-0.257381	0.550529	1.34431	0.399669	0.0951748	0.357403	0.564752	-0.247287	22	43.2564	20.3006	0	C590
592	-0.321249	0.250627	1.04381	-0.650121	-0.959819	2.09919	-1.2086	-2.17621	0.331934	1.93018	0.193442	0.722487	0.547528	5	-56.9776	29.9073	0	C591
593	0.16108	0.0985657	0.178853	-0.139698	0.826603	-0.746831	0.160842	1.3927	-0.273019	-0.384288	0.478862	-0.649249	-0.710216	9	-22.5242	22.3155	0	C592
594	0.319713	0.617411	-0.508206	0.134931	1.14214	-0.714629	0.575791	0.249844	0.230953	-0.798288	-0.189696	-0.31392	-0.410905	20	6.81589	20.4872	0	C593
595	1.54234	0.0790602	-0.655786	-0.0567229	0.363871	-0.33093	0.0887533	0.211914	-0.35453	-0.715477	0.121619	-0.373489	0.395279	2	-19.9393	-35.9811	0	C594
596	1.45601	-0.169959	-0.335224	0.0743839	0.364499	-0.424105	0.207211	0.604754	-0.182678	-0.950801	-0.325817	-0.409675	0.438611	2	-6.98519	-41.206	0	C595
597	1.26996	0.403371	-0.912422	-0.0596787	0.817366	-0.399488	0.264512	-0.0514803	0.0387268	-0.854745	-0.281953	-0.185709	0.351874	34	15.4833	-37.7357	0	C596
598	1.12332	-0.0829509	-0.64675	0.233849	0.475794	-0.504863	0.19251	0.989537	-0.250037	-0.877227	0.0246931	-0.497512	0.1804	37	-36.9561	-17.9045	0	C597
599	1.90052	-0.070339	-0.960155	0.36497	0.493163	0.00111783	0.0416361	0.258498	-0.519057	-0.930929	-0.30459	-0.555672	0.864601	27	-19.2824	-71.6932	0	C598
600	0.934762	0.709032	-0.642486	-0.27154	1.32562	-0.379388	0.497138	-0.08143	0.218476	-0.708303	-0.753526	-0.337875	-0.0731489	33	34.4261	-1.59313	0	C599
601	1.06178	-0.0426391	-0.563883	-0.231325	0.363048	-0.507975	0.437552	0.0525749	0.151682	-0.711864	0.0221273	-0.054193	0.24651	15	-15.0581	-18.1234	0	C600
602	1.34995	0.144	-0.543771	-0.208647	0.618691	-0.440285	0.247994	0.229779	-0.0337991	-1.00314	-0.108096	-0.267222	0.350648	15	0.605511	-31.3562	0	C601
603	-1.26862	-0.561175	0.810821	0.378805	-1.11637	-0.141613	0.363714	0.971042	0.385723	0.255703	0.395599	0.538653	-0.347921	22	49.3703	15.3617	0	C602
604	1.30593	0.215529	-0.596698	-0.0666832	0.563337	-0.378706	0.0137232	0.576478	-0.0230166	-0.758342	-0.29508	-0.455105	0.206854	15	-1.81307	-36.5428	0	C603
605	-1.19143	-0.360522	1.53515	0.164898	-0.399667	0.0105058	-0.045395	0.778119	1.4811	0.232987	-1.25001	0.32348	-0.354803	23	30.2804	-62.7952	0	C604
606	0.373917	0.316967	-0.282353	-0.448821	0.688283	-0.74487	0.243911	0.800211	0.0636373	-0.388159	0.292887	-0.469301	-0.198886	9	-16.716	18.888	0	C605
607	0.446586	0.674887	-0.473154	-0.348638	1.20398	-0.630069	0.463451	0.396818	0.0436791	-0.59608	0.0294258	-0.470995	-0.400571	20	9.90452	22.5542	0	C606
608	1.77816	0.0838122	-0.645348	0.185075	0.557382	-0.140656	0.189144	0.0348567	-0.311548	-0.974908	-0.30856	-0.656213	0.669825	11	1.4184	-59.5168	0	C607
609	0.629898	0.580434	-0.667653	-0.284907	1.1436	-0.63229	0.345777	0.868966	-0.288745	-0.547149	0.0104121	-0.563176	-0.199024	12	2.89964	13.9354	0	C608
610	1.70529	0.177344	-0.696556	0.17011	0.627432	-0.127294	0.051407	0.739888	-0.325897	-0.847879	-0.664806	-0.768489	0.498004	27	-8.67919	-59.0855	0	C609
611	-0.956322	-0.171827	1.09231	-0.141314	-0.386556	-0.186257	-0.252227	0.98797	1.6753	0.345421	-0.88305	0.230616	-0.621271	23	35.9217	-62.8179	0	C610
612	0.823212	0.120137	-0.471421	-0.328903	0.572654	-0.523768	0.386982	0.271433	-0.070334	-0.664915	0.197649	-0.157461	0.0445492	31	-17.0236	-3.15199	0	C611
613	1.26052	-0.0268192	-0.536835	0.0978569	0.453563	-0.258234	-0.00347886	0.56591	-0.515184	-0.766519	0.305438	-0.491685	0.213852	18	-33.6618	-25.3235	0	C612
614	0.393014	0.503927	-0.586721	-0.271446	1.06628	-0.541972	0.351997	0.781896	-0.0334865	-0.671404	0.22496	-0.42838	-0.453831	9	-6.92925	15.0843	0	C613
615	0.669837	-0.10729	-0.509327	-0.215545	0.40068	-0.418946	0.335496	0.129984	0.0269667	-0.596472	0.511565	-0.0378417	-0.0191	21	-21.9673	-2.5345	0	C614
616	-1.01114	0.825756	-0.180583	-0.0145777	1.19425	0.41911	0.370777	-1.76549	-0.185227	1.0475	0.761203	-0.0663932	-0.621433	1	7.40885	79.9097	0	C615
617	1.34453	0.17046	-0.0103308	0.618761	0.779222	-0.521035	0.0816372	0.757158	-0.262741	-1.07196	-0.756042	-0.923584	0.356874	11	13.4169	-52.6152	0	C616
618	0.888597	0.468654	-0.377057	-0.362582	0.94988	-0.624671	0.290707	0.439113	-0.23472	-0.661142	0.340423	-0.771355	0.0168582	12	1.10091	4.36007	0	C617
619	0.800998	0.289128	-0.631437	-0.0264144	0.744945	-0.573629	0.466964	0.442624	-0.0168807	-0.721608	-0.397167	-0.0740755	-0.0149219	26	13.1635	-8.75686	0	C618
620	1.11052	-0.335511	-0.558202	-0.363104	0.0308137	-0.211706	0.155552	0.148201	-0.0580991	-0.441294	0.753163	-0.128124	0.128861	37	-31.973	-8.21127	0	C619
621	-1.2157	-0.0248993	1.42049	0.473375	-0.373819	-0.260174	0.170317	-0.145748	1.44167	-0.212071	-0.899645	0.402473	0.0945848	23	34.6329	-51.7196	0	C620
622	0.464803	0.622275	-0.417016	-0.394646	1.07699	-0.747687	0.626193	-0.0695195	0.344799	-0.731559	-0.253941	-0.00820354	-0.194154	19	16.6655	19.3967	0	C621
623	-0.971723	0.281203	1.46085	0.703474	-0.935025	0.417217	-1.10168	0.586124	-0.109668	1.07905	-0.538552	0.371584	-0.227522	3	-50.4848	11.4384	0	C622
624	1.45977	0.0449339	-0.341417	-0.123373	0.30543	-0.317452	-0.162064	1.04221	-0.642924	-0.555598	0.210887	-0.60463	0.0499151	18	-39.672	-23.8274	0	C623
625	1.25487	-0.268666	-0.375477	-0.141872	0.167072	-0.423371	0.177615	0.719043	-0.0592604	-0.770327	-0.223828	-0.133579	0.333575	18	-31.9718	-40.1067	0	C624
626	0.924298	0.200241	-0.777213	-0.232061	0.799588	-0.398941	0.267915	0.282866	-0.0339878	-0.687575	0.263088	-0.313431	0.0068671	31	-17.3624	-2.13092	0	C625
627	0.911619	0.174965	-0.506704	-0.249473	0.619802	-0.540354	0.27245	0.451077	-0.0772304	-0.72417	0.0980678	-0.197182	-0.00323902	31	-11.434	-2.34153	0	C626
628	-1.14713	-0.0341373	1.5855	0.0132203	-0.530493	-0.20401	0.0543411	1.25103	0.927506	0.105436	-0.814413	0.0505329	-0.465514	23	30.208	-57.5377	0	C627
629	1.37422	-0.198264	-0.307	-0.00939792	0.224341	-0.322325	-0.168181	0.394355	-0.390428	-0.725444	0.444062	-0.557863	0.534587	18	-40.7923	-32.2821	0	C628
630	1.61488	-0.475298	0.675247	0.258832	-0.145303	-0.107038	-0.430195	0.193369	-0.0906088	-0.856878	-0.239764	-0.619745	0.599748	27	-25.5609	-58.8266	0	C629
631	-1.32543	-0.281632	3.46192	-0.335102	-0.316439	-0.797789	-0.0119588	-0.431173	1.56402	-0.688458	-0.62391	0.812462	0.312519	35	10.0567	-84.9772	0	C630
632	-1.13591	0.140582	1.83689	0.883127	-0.880054	0.391294	-0.911852	0.0250054	-0.0711033	1.05544	-0.629648	0.363619	-0.0280071	3	-54.1478	4.26025	0	C631
633	-2.04679	2.24563	3.14388	-1.0507	1.28433	-1.38266	0.713525	-0.535873	4.46487	-0.905261	-1.70085	0.833422	-1.32677	23	32.057	-74.1047	0	C632
634	-1.05943	0.903865	0.0369115	0.092991	1.38194	0.192642	0.439434	-2.2186	0.0464414	0.77606	1.51252	-0.0383679	-0.846898	1	7.10432	85.1141	0	C633
635	-0.802918	-0.721698	0.923497	-0.276834	-0.805215	0.69948	0.506361	-1.37337	0.858887	1.2608	-0.916576	1.10819	0.630693	25	96.9907	18.7275	0	C634
636	1.11485	-0.0157544	-0.472176	-0.209824	0.474609	-0.458864	0.19948	0.525986	-0.248328	-0.726447	0.22115	-0.278285	0.114281	37	-24.7441	-15.5067	0	C635
637	-0.799494	0.94958	-0.774373	-0.506251	1.4722	0.560109	0.575136	-1.78103	-0.0696955	1.28891	0.327317	0.282884	-0.511892	7	16.3295	78.3953	0	C636
638	0.402457	0.659681	-0.339641	-0.173837	1.22181	-0.630588	0.546331	0.534145	0.142934	-0.637259	-0.378031	-0.495739	-0.498379	20	7.2312	24.999	0	C637
639	-1.66323	-1.00826	2.58476	4.66629	0.203842	-0.678427	0.406178	-0.810942	0.136335	-0.347098	-0.316433	-0.0514949	-0.821689	30	-19.5026	42.255	0	C638
640	0.380987	0.468251	-0.91981	-0.259513	1.11909	-0.578251	0.574266	0.864312	0.0204351	-0.469936	-0.289767	-0.150835	-0.354031	12	7.04148	13.5444	0	C639
641	1.19222	0.0314383	-0.223366	0.0670819	0.46152	-0.469029	0.0521462	0.544453	-0.154245	-0.843672	-0.170068	-0.475197	0.236351	15	-2.90286	-31.1037	0	C640
642	-1.29798	-0.560548	0.61749	0.0783024	-1.09854	0.0856752	0.239289	1.33819	0.31572	0.20669	0.666836	0.400342	-0.284365	22	44.2077	16.7176	0	C641
643	0.185256	0.746713	-0.870587	-0.515873	1.25389	-0.473738	0.521419	0.43581	0.173758	-0.48088	0.262786	-0.375295	-0.462772	20	-0.822932	29.1676	0	C642
644	-0.849929	-0.47445	1.13228	-0.26308	-1.10627	0.845091	-0.809167	-0.155042	0.190115	1.42016	0.309679	0.453703	-0.0188085	29	-80.1246	-13.7109	0	C643
645	1.4716	-0.0085353	-0.955953	-0.00934879	0.319713	-0.332289	0.0924744	1.03303	-0.303322	-0.657367	-0.316669	-0.209193	0.329266	15	-10.8543	-34.4708	0	C644
646	1.48143	0.247847	-0.366632	-0.050197	0.734062	-0.27607	0.250842	0.0670923	-0.314051	-1.10601	-0.238181	-0.483197	0.435241	11	3.92264	-49.1995	0	C645
647	-1.01185	0.775217	-0.0972406	-0.783887	1.18254	0.490373	0.271774	-2.48883	0.0221015	1.15061	2.79001	0.155292	-0.721981	10	28.5524	56.6392	0	C646
648	-0.357252	0.22178	0.335117	-0.724728	-1.16916	1.96769	-1.51984	-1.00961	0.0855133	1.36827	1.52458	0.287897	0.256594	5	-46.1932	25.5833	0	C647
649	-1.06713	0.556424	-0.277116	0.150786	1.00951	0.345159	0.168836	-1.50869	-0.561298	0.972383	1.82889	-0.0309021	-0.795647	1	6.93237	68.4094	0	C648
650	1.49601	0.0435972	-0.739207	0.187681	0.551816	-0.380262	0.138464	0.623842	-0.416943	-0.836265	-0.125056	-0.534435	0.393065	2	-19.4138	-45.8215	0	C649
651	1.15775	0.286616	-0.645937	-0.158691	0.833469	-0.441362	0.25603	0.130427	-0.163943	-0.777555	0.0830441	-0.465153	0.214964	26	4.47728	-11.145	0	C650
652	-1.32241	-0.255891	3.38655	-0.395938	-0.324531	-0.693814	-0.126852	-0.24832	1.56636	-0.576553	-0.849349	0.752735	0.316452	35	11.079	-81.7396	0	C651
653	1.43049	0.120547	-0.226909	0.482265	0.57712	-0.400223	0.0470483	-0.130837	-0.294107	-0.910971	-0.148425	-0.619646	0.39916	11	0.717831	-56.6596	0	C652
654	1.77629	-0.18635	-0.42326	0.234742	0.0167334	-0.0842224	-0.238592	0.251899	-0.540088	-0.793072	0.331003	-0.631797	0.68883	28	-35.0196	-59.3865	0	C653
655	0.516437	1.08067	-0.640854	-0.208129	1.65195	-0.619302	0.750466	0.392774	0.25847	-0.826353	-0.668942	-0.559214	-0.537171	19	25.8073	22.9602	0	C654
656	0.720137	0.372343	-0.506967	-0.0351314	0.865392	-0.49459	0.340833	0.929044	-0.122922	-0.640439	-0.596359	-0.418659	-0.0871707	33	25.7689	-8.42336	0	C655
657	0.598171	0.863467	-0.452045	-0.221592	1.23655	-0.671069	0.536296	-0.239562	0.0776621	-0.745917	-0.181183	-0.254922	-0.20773	19	21.8995	14.8946	0	C656
658	1.47289	0.0206386	-0.705799	0.344059	0.449906	-0.37101	0.0690636	0.401259	-0.527265	-0.907828	0.243649	-0.59322	0.499324	2	-21.8085	-49.5198	0	C657
659	-1.43396	-0.278411	0.718148	0.0450477	-0.927398	-0.316732	0.405784	1.5732	0.37056	0.335151	-0.0948351	0.663851	-0.305792	22	43.7981	9.87177	0	C658
660	1.61029	-0.425883	-0.520548	0.338311	0.210201	-0.34813	0.0333063	0.114206	-0.0975297	-0.760748	-0.112433	-0.23908	0.525319	28	-32.7742	-46.7758	0	C659
661	0.681759	0.225683	-0.626049	-0.184336	0.656812	-0.566035	0.161241	0.254957	-0.0514529	-0.462023	0.44126	-0.123665	-0.195151	21	-20.3404	5.18445	0	C660
662	1.0434	-0.211947	-0.211576	0.0936284	0.446962	-0.584061	0.142786	0.214348	-0.0574324	-0.828537	0.297385	-0.286172	0.152621	31	-18.2581	-17.3173	0	C661
663	1.61768	0.0487976	-0.335761	0.437427	0.636996	-0.26196	0.175457	0.109844	-0.165445	-1.1181	-0.774859	-0.411901	0.480361	11	8.63763	-56.2094	0	C662
664	0.986525	-0.472856	-0.423266	-0.0769805	-0.134697	-0.375291	0.043491	1.89709	-0.363415	-0.477467	0.21762	-0.486895	0.0629103	30	-28.4897	24.4202	0	C663
665	1.45382	-0.349688	-0.576504	0.323653	0.12176	-0.307279	0.0845876	0.852081	-0.0407233	-0.962905	-0.387604	-0.33977	0.514146	27	-9.75736	-64.6854	0	C664
666	-1.31689	-0.786738	0.904091	-0.155823	-1.04898	0.193099	0.430759	0.983308	0.516791	0.552883	-0.0915027	0.586767	-0.0817475	22	49.3337	10.9886	0	C665
667	-0.83034	-0.304667	1.81416	-0.312294	-0.0672877	-0.00660556	-0.257152	0.803902	0.865027	0.268237	-0.829166	-0.126457	-0.414169	23	26.5808	-59.7739	0	C666
668	-0.953339	1.20583	-0.178243	-0.0964397	1.64381	0.233817	0.697154	-2.29769	0.180842	0.75547	0.886888	0.0712552	-0.973895	7	10.0128	86.3445	0	C667
669	1.03357	0.14479	0.0803305	1.06725	0.652393	-0.514217	0.12258	0.235205	-0.162289	-1.13719	-0.629678	-0.629658	0.179192	34	25.457	-39.1556	0	C668
670	0.410079	1.22412	-0.76871	-0.312159	1.64943	-0.805206	0.623842	0.473055	0.207248	-0.651205	-0.366796	-0.553785	-0.529626	20	17.7458	33.1258	0	C669
671	-0.802958	0.639975	-0.0838977	0.283265	1.04109	-0.115617	0.195203	-0.751804	-0.411614	0.416126	1.50705	-0.38148	-1.03755	1	-3.53918	64.6016	0	C670
672	-0.145769	0.446169	0.702635	-0.731479	-0.773696	2.16785	-0.882396	-2.10949	1.19694	1.85435	-1.19512	0.805124	0.582819	6	-71.9963	20.235	0	C671
673	0.378994	0.0188632	0.0712359	-0.0711766	0.433525	-0.526974	0.155186	0.716732	-0.0109257	-0.738564	0.110324	-0.261028	-0.119372	21	-27.2002	18.4488	0	C672
674	-0.984101	0.0813305	0.719845	0.445479	-0.438346	-0.119599	0.940776	-0.721506	1.31045	-0.12454	-0.944498	1.01109	-0.336792	23	36.4434	-49.8072	0	C673
675	0.659326	0.633886	-0.437419	-0.430947	1.13076	-0.504452	0.302168	0.72169	-0.179182	-0.580257	-0.15346	-0.458841	-0.366909	12	3.63345	16.2261	0	C674
676	1.0071	0.196219	-0.897137	0.0921339	0.648158	-0.409438	0.212729	0.320537	-0.0483068	-0.699392	-0.0627913	-0.277359	0.213668	15	-6.51397	-18.583	0	C675
677	-0.896619	-0.100495	1.79191	-0.0564813	-0.271613	-0.223723	-0.319992	1.42173	0.844125	0.299598	-0.732512	-0.0786644	-0.873456	23	31.3575	-56.7575	0	C676
678	2.06353	-0.422407	-0.316914	0.344865	0.0688654	-0.128663	-0.199042	0.420642	-0.510952	-1.00218	-0.059123	-0.576675	0.826295	28	-33.6694	-65.0977	0	C677
679	-0.319355	0.239183	0.500127	-0.519377	-0.837953	2.02345	-0.720835	-2.01479	0.974335	2.2477	-1.27362	1.16547	0.421013	6	-66.2456	24.5937	0	C678
680	1.2877	-0.0658016	-0.604275	-0.151513	0.406497	-0.443075	0.18458	0.691042	-0.143591	-0.75081	-0.285937	-0.171823	0.343823	15	-11.7651	-34.0606	0	C679
681	0.780211	0.633272	-0.119663	-0.266461	1.00853	-0.660486	0.385542	-0.249918	0.157092	-0.82906	-0.0917439	-0.474428	0.0357074	33	16.7724	-3.21819	0	C680
682	-0.878455	-0.361237	1.52931	0.47911	-1.10119	0.965628	-0.897312	-0.00881338	-0.160801	1.71183	-0.908017	0.555282	0.122306	17	-76.6415	-21.4335	0	C681
683	-0.430235	-0.209192	0.524479	-0.643126	-1.34475	1.77061	-1.23742	-1.60462	-0.701697	1.86756	3.04752	0.614845	0.285693	30	-33.3307	38.971	0	C682
684	2.11394	-0.14362	-0.618121	0.346569	0.286558	-0.184024	0.0213003	0.538821	-0.238063	-1.07444	-0.708431	-0.565488	0.853686	27	-21.3712	-69.6502	0	C683
685	-1.19428	0.478293	0.0615163	-0.913562	0.84266	0.407116	0.0310336	-1.46349	-0.133726	1.05314	2.49098	0.220498	-0.880744	10	20.8656	62.6865	0	C684
686	2.34088	-0.485544	-0.561732	0.394738	0.0265198	-0.0398743	-0.366762	1.0921	-0.81355	-0.816212	-0.344463	-0.706994	1.08534	28	-40.4193	-63.858	0	C685
687	1.7743	-0.0466883	-0.181268	0.367425	0.533153	-0.275842	-0.206469	0.381588	-0.56706	-0.982229	0.0563397	-0.944827	0.574905	27	-21.1034	-57.6608	0	C686
688	-1.44307	-0.221689	3.77401	-0.216973	-0.390632	-0.833587	-0.109109	-0.509451	1.67335	-0.869847	-0.793725	0.857345	0.543376	35	8.46309	-86.8786	0	C687
689	1.64928	-0.0579779	-0.588374	-0.00612145	0.499881	-0.213098	-0.0378007	0.477881	-0.469154	-0.727976	-0.286528	-0.491935	0.639993	2	-17.1571	-45.2455	0	C688
690	-0.844182	-0.632435	0.688268	-0.612184	-1.57397	1.25761	-1.2171	-0.399187	-0.592296	2.1873	2.84169	0.825103	-0.0531632	32	-34.1677	65.6112	0	C689
691	-0.194741	0.35575	0.213888	-0.757942	-1.07897	2.00654	-1.60122	-1.47271	0.485664	1.10756	1.86255	0.16721	0.347578	5	-44.6057	28.1569	0	C690
692	-1.03624	-0.671061	0.920886	-0.650497	-1.34294	1.32849	-0.99179	-0.281891	-0.306952	1.98726	1.94552	0.785978	-0.235481	32	-28.2119	63.181	0	C691
693	-0.105633	-0.0255705	0.217739	-0.420644	-1.18407	2.36715	-1.14183	-1.96419	-0.282694	2.08364	0.7193	0.774925	0.817827	36	-48.538	45.5905	0	C692
694	-1.12505	0.68067	-0.150859	1.09986	1.23009	0.365479	0.281081	-2.07733	-0.216862	0.765448	0.971105	0.00399103	-0.793464	1	-1.02166	81.8807	0	C693
695	-0.476581	-0.870419	0.331368	0.62205	-1.00381	-0.178961	0.64084	-0.221988	0.539273	0.12352	0.330987	0.699817	-0.0752077	14	57.4805	30.6153	0	C694
696	-1.09079	0.183862	0.22743	0.293224	0.838255	0.582536	-0.0602147	-2.2784	-0.375389	1.20602	2.55586	0.199802	-0.745414	10	28.7028	65.9936	0	C695
697	0.373473	-0.999561	0.970937	-0.72559	-1.17078	1.79242	-0.734285	-0.352836	0.242209	-0.135543	-1.54261	0.596203	3.24709	16	86.8129	-13.0869	0	C696
698	1.92856	-0.437929	-0.721572	0.486359	0.0417028	-0.15366	-0.199861	0.628722	-0.393452	-0.884491	0.0223481	-0.627982	0.867443	28	-42.6158	-60.4009	0	C697
699	0.949704	-0.023067	-0.726	0.300301	0.474803	-0.394958	0.244707	0.36798	-0.0249467	-0.824071	0.238768	-0.336381	0.0286994	15	-6.94628	-21.4059	0	C698
700	-0.903203	0.0956033	-0.173809	-0.15468	0.333044	1.0076	-0.288738	-1.39945	-0.687709	1.69867	1.46697	0.433627	-0.597927	7	13.4408	66.3508	0	C699
701	1.44418	0.0762905	-0.374291	-0.0466992	0.623776	-0.600133	0.261621	0.28097	0.0515029	-0.95797	-0.267735	-0.420332	0.269591	15	-0.763994	-32.5026	0	C700
702	1.712	-0.303737	-0.382993	0.646302	0.129923	-0.171237	-0.0853987	0.450553	-0.335467	-0.950086	-0.283061	-0.686694	0.706488	27	-21.0668	-63.1887	0	C701
703	1.25337	0.068821	-0.499811	-0.17726	0.557009	-0.354845	0.108094	0.299463	-0.0575398	-0.841521	0.0946236	-0.353064	0.168433	15	-15.5137	-23.1311	0	C702
704	0.464303	0.260419	-0.450259	-0.328857	0.812106	-0.56607	0.496963	0.852412	-0.224664	-0.613026	0.0632256	-0.272321	-0.232736	9	-16.8942	17.4677	0	C703
705	0.600271	0.134952	-0.419352	-0.104281	0.772648	-0.60189	0.314021	0.270671	0.11811	-0.597171	0.324681	-0.330369	-0.271993	9	-11.8322	11.6812	0	C704
706	1.30896	0.584633	-0.931697	-0.214406	0.977394	-0.316645	0.316279	0.232573	-0.0780475	-0.555341	-0.361077	-0.57534	0.062922	24	27.0741	-13.887	0	C705
707	-1.00686	1.00155	-0.248201	0.90149	1.43607	0.250424	0.454193	-2.4933	-0.188555	0.740736	1.51518	-0.0515498	-0.938313	1	6.41422	85.9815	0	C706
708	-0.764682	0.832591	-0.551031	0.439257	1.30264	-0.0396635	0.535748	-1.41326	-0.0655167	0.650987	0.496182	-0.0709427	-0.725062	1	2.57449	84.1522	0	C707
709	-1.13549	0.592189	0.118308	0.634996	1.06565	0.240593	0.210424	-1.59286	-0.405046	0.842604	1.21782	-0.0821916	-0.954429	1	-1.27513	78.4974	0	C708
710	0.924722	0.232402	-0.407221	-0.114964	0.78955	-0.214323	0.17122	0.441468	-0.370603	-0.556162	-0.239718	-0.450114	-0.00854913	26	5.3131	-19.6453	0	C709
711	-1.32055	-0.0770304	1.37212	0.964135	-0.948505	-0.126365	0.00237029	1.70274	0.383404	-0.0334786	0.304616	-0.0605167	-1.04544	22	37.0136	23.8374	0	C710
712	0.884318	0.200966	-0.552833	0.37758	0.680491	-0.578211	0.26646	0.465609	-0.215324	-0.925989	0.160249	-0.297134	-0.171211	24	16.3878	-16.0428	0	C711
713	-1.14337	-0.1165	1.33651	-0.126611	-0.325213	-0.0406853	-0.141014	1.01949	1.33498	0.378712	-0.834263	-0.0352428	-0.522293	23	32.6819	-58.9686	0	C712
714	-1.16905	0.0960084	0.384677	0.918778	0.433861	0.523176	-0.262378	-1.60075	-0.606385	1.09988	1.37945	0.143711	-0.501963	1	-4.9714	75.0948	0	C713
715	-1.01844	-0.276791	2.87198	-0.197128	-0.429629	-0.638338	-0.341071	0.0486709	1.44077	-0.443441	-0.780906	0.651956	0.171368	35	15.4632	-76.9624	0	C714
716	-1.47751	-0.748749	0.729653	1.48074	-0.705099	-0.426594	0.471601	2.33985	0.35328	0.13584	-1.04793	0.457576	-0.258227	8	61.4663	-17.9511	0	C715
717	-1.42834	0.576871	1.57877	2.29834	-0.668877	0.749504	-1.25121	-2.3546	-0.355158	1.31317	2.05898	0.323236	-0.673349	29	-94.1105	1.43379	0	C716
718	0.445775	0.802657	-0.537806	-0.404527	1.30685	-0.455577	0.310429	0.154614	-0.245491	-0.359375	0.51887	-0.587004	-0.590048	4	-4.44688	43.1717	0	C717
719	0.00694153	0.169002	-0.422103	-0.416939	0.625579	-0.493873	0.033642	1.34168	-0.128364	-0.332231	0.826336	-0.334104	-0.540654	9	-20.434	24.8939	0	C718
720	-0.851917	-0.142918	2.07298	-0.121812	-0.306205	-0.438604	-0.242755	0.871997	0.917409	-0.0929096	-0.858536	0.0352055	-0.0735168	23	22.935	-63.8644	0	C719
721	0.951839	0.451737	-0.404975	0.0354049	0.790623	-0.613476	0.274039	0.254101	0.015679	-0.848314	-0.150904	-0.486914	0.00289964	24	19.1494	-17.293	0	C720
722	-0.112393	0.887459	-0.401154	-0.561624	1.44476	-0.642478	0.682793	0.601719	0.141517	-0.567733	-0.146163	-0.353889	-0.542369	20	6.07224	31.7707	0	C721
723	0.703111	0.394985	-0.703646	-0.283243	0.863363	-0.597418	0.581528	0.910878	0.00974818	-0.540577	-0.502637	-0.347772	-0.1129	12	5.56387	13.0663	0	C722
724	1.06839	0.734199	-1.12678	-0.158362	1.15467	-0.44436	0.441794	0.0687526	-0.121062	-0.535008	-0.0935864	-0.514009	0.0635807	19	22.8	7.81644	0	C723
725	-1.03928	-0.267647	3.55618	-0.15163	-0.289577	-0.611247	-0.0751747	-0.588747	1.43865	-0.917249	-0.799533	0.678557	0.30843	35	8.30288	-84.1296	0	C724
726	0.587976	0.811386	-0.563893	-0.517453	1.23924	-0.734532	0.515914	0.267752	0.0622494	-0.790889	0.186664	-0.326972	-0.31208	19	11.89	21.0874	0	C725
727	0.302402	0.642461	-0.386792	-0.393322	1.15772	-0.785705	0.690609	0.76563	0.120969	-0.702658	0.128112	-0.413681	-0.685937	20	2.14804	28.5952	0	C726
728	-0.920115	0.917326	-0.543541	0.28252	1.38139	0.547316	0.510417	-2.45273	-0.0838077	1.2697	1.01812	0.305626	-0.685721	1	6.85076	83.02	0	C727
729	0.937438	0.160723	-0.376848	-0.344503	0.776358	-0.402489	0.199686	0.55739	0.00379776	-0.475018	-0.352341	-0.266114	-0.182254	31	-9.62172	-4.20777	0	C728
730	1.86158	0.323997	-0.662709	0.222383	0.918201	-0.0486501	0.299966	-0.317465	-0.211915	-0.948283	-0.883253	-0.667087	0.699969	11	5.55704	-58.6649	0	C729
731	-0.752645	-0.466049	1.70577	0.0272869	-0.389258	0.0219242	-0.0839108	0.861016	1.22852	0.124664	-0.934254	-0.149494	-0.451825	23	27.0806	-59.0726	0	C730
732	1.48215	-0.106292	-0.392475	0.418786	-0.0417812	-0.452619	0.132317	0.647246	-0.342806	-1.05466	-0.0769155	-0.286158	0.437178	28	-30.493	-49.0031	0	C731
733	0.653316	0.431125	-0.532827	0.0758925	0.905918	-0.816632	0.477903	0.266749	0.161918	-0.850449	-0.315683	-0.177612	0.0463458	33	20.023	-8.32572	0	C732
734	-0.0358342	-0.171273	0.0731458	-0.317552	-1.192	2.36332	-0.326888	-1.75602	-0.122929	2.75944	-1.23571	1.56264	0.431635	36	-62.6014	43.1572	0	C733
735	-1.08147	-0.609002	1.64385	1.03718	-1.02282	0.938237	-0.575199	-0.733059	0.289029	1.482	-0.967034	0.653449	-0.000257	29	-84.445	-4.24658	0	C734
736	-1.04784	0.767556	-0.388374	0.125684	1.35322	0.197548	0.402006	-1.05741	-0.0240381	0.7124	0.868847	-0.133375	-1.14712	7	10.3091	79.7706	0	C735
737	-0.998056	-0.368239	2.68166	-0.260365	-0.626552	-0.428613	-0.274781	0.455719	1.26004	0.0921925	-0.777429	0.318868	-0.108361	35	20.7096	-72.9369	0	C736
738	-1.03561	-0.29832	3.04635	-0.382812	-0.373454	-0.712283	-0.24659	-0.0329846	1.5951	-0.398181	-0.660596	0.498975	0.0443466	35	16.431	-80.1406	0	C737
739	0.821655	0.37759	-0.532935	-0.35693	0.910806	-0.503146	0.351825	0.531439	-0.0750668	-0.569728	-0.179434	-0.373865	-0.11678	12	5.37006	5.36288	0	C738
740	1.66011	-0.0757471	-0.885913	-0.0705501	0.344814	-0.255184	0.198128	-0.0520793	0.214381	-0.663899	-0.34996	-0.279425	0.633521	11	-4.01145	-51.3204	0	C739
741	0.908831	0.456271	-0.571149	-0.299022	0.924142	-0.43141	0.393362	0.453301	-0.0636145	-0.710968	-0.305013	-0.252583	-0.181701	12	5.80599	5.72374	0	C740
742	-1.25645	-0.406254	0.0436003	0.260148	-0.995166	0.153788	0.528727	0.0938001	0.183912	0.66764	0.681749	0.600118	-0.0305378	14	55.1628	23.3483	0	C741
743	-0.318447	0.619723	1.13056	-0.806905	-0.726272	2.12297	-0.748159	-2.07118	1.26988	1.77491	-1.53491	0.754307	0.525398	6	-72.3705	18.8633	0	C742
744	1.3025	-0.0344523	-0.561695	0.0993837	0.604375	-0.37753	0.205036	0.627519	-0.232011	-0.800554	-0.571297	-0.25452	0.321521	15	-3.49	-39.5305	0	C743
745	0.463392	0.808485	-0.672304	-0.434637	1.31458	-0.801048	0.72164	0.402786	0.0175978	-0.745534	0.0849275	-0.337183	-0.345338	19	11.2343	20.5866	0	C744
746	1.16747	0.444348	-0.674865	0.401168	0.940033	-0.485339	0.269671	0.40586	-0.269989	-0.98216	-0.305163	-0.49669	-0.0116637	34	15.2456	-28.4175	0	C745
747	0.671261	0.84231	-0.83459	-0.429088	1.44762	-0.604598	0.517375	0.855888	-0.0790171	-0.789857	-0.00993514	-0.766895	-0.226068	20	7.78075	22.9444	0	C746
748	1.23415	0.0348341	-0.539379	-0.120813	0.601542	-0.546842	0.0959917	0.385671	-0.256534	-0.735752	0.0605069	-0.287656	0.36049	15	-15.0431	-22.7412	0	C747
749	1.65161	-0.354163	-0.427084	0.226354	0.16099	-0.393353	-0.118637	0.831954	-0.158007	-0.956198	0.117284	-0.653814	0.507157	28	-41.3883	-49.1329	0	C748
750	-0.550421	-0.215928	0.780872	-0.797126	-1.44684	1.76916	-1.18618	-1.08784	-0.584773	1.86865	2.18521	0.682208	0.197928	30	-38.4774	36.0786	0	C749
751	-0.167601	0.287395	0.0595424	-0.561451	-0.815245	2.33598	-0.958657	-1.91787	0.617665	2.43081	-1.26219	1.19309	0.693593	6	-66.2836	28.4728	0	C750
752	0.206231	-0.835858	0.114117	1.1996	-0.963918	0.0341324	-0.0461331	-0.987	0.0226888	0.551109	0.604928	0.372662	0.282777	14	58.4961	37.9499	0	C751
753	1.16566	0.325354	-0.842336	-0.284229	0.772206	-0.518236	0.332511	0.480321	-0.144462	-0.836079	0.125646	-0.325438	0.144076	26	-0.941061	-12.8058	0	C752
754	-0.941211	1.11919	-0.802829	-0.286122	1.54557	0.324662	0.550551	-1.76974	0.0272787	0.890866	1.0842	-0.0575668	-0.708279	7	14.2397	80.3336	0	C753
755	1.08846	0.0626503	-0.138508	0.505475	0.618976	-0.672994	0.133407	0.171279	-0.168391	-0.900834	0.0314462	-0.503953	0.0757579	2	-14.0981	-47.5013	0	C754
756	-0.305298	0.802443	-0.586322	-0.237625	1.3787	0.0648165	0.414689	-0.817846	-0.191848	0.477722	0.452707	-0.286124	-0.763554	4	-1.8242	59.625	0	C755
757	1.33956	0.0205788	-0.565226	0.34405	0.449767	-0.450043	0.223933	0.0288785	-0.141911	-0.964144	-0.00325894	-0.29792	0.320653	2	-12.33	-43.0782	0	C756
758	-0.010949	0.0998013	-0.072579	-0.593401	-1.09157	2.22002	-1.15177	-1.26296	-0.777623	2.43754	0.0533469	1.01623	0.56768	36	-52.957	40.627	0	C757
759	-0.896416	0.713283	-0.260155	0.242953	1.13145	0.212746	0.26624	-0.709546	-0.414414	0.606274	0.687883	-0.256272	-0.927726	1	-4.68658	65.5473	0	C758
760	1.29063	-0.0953365	-0.627948	0.327097	0.401922	-0.425868	-0.106027	0.30294	-0.228121	-0.779095	0.270581	-0.421577	0.392892	18	-27.2967	-36.8494	0	C759
761	-1.20204	0.0597008	2.39355	0.296764	-0.310555	-0.744323	-0.182427	-0.176132	1.54314	-0.311634	-1.03879	0.553353	0.128185	35	15.8749	-71.8211	0	C760
762	-1.18194	-0.201197	1.09196	-0.155935	-0.398792	-0.131422	0.200079	0.862133	1.58522	0.101807	-1.20531	0.647698	-0.384024	23	34.3826	-53.6488	0	C761
763	0.732404	0.327866	-0.481559	-0.369274	0.710686	-0.504029	0.196342	0.720386	-0.102675	-0.460274	-0.0948357	-0.295107	-0.138228	31	-11.3143	4.59694	0	C762
764	-1.20373	0.110031	1.77714	0.774752	-0.769134	0.120216	-0.637979	-0.148828	0.0825122	1.01364	-0.650293	0.561574	-0.108773	3	-54.7262	2.674	0	C763
765	-1.1288	-0.0110249	1.8002	-0.300099	-0.591229	-0.0772789	-0.218184	0.800189	1.49547	0.30803	-1.2161	0.383973	-0.345777	23	30.9653	-63.4859	0	C764
766	1.21788	-0.222464	-0.422278	0.12598	0.291433	-0.484158	0.00516893	0.842318	-0.00170804	-0.897691	-0.0865417	-0.325981	0.277166	37	-37.8287	-15.9298	0	C765
767	1.00971	0.0422619	-0.253859	-0.329477	0.548903	-0.492127	0.335878	0.0740535	-0.00975334	-0.819383	-0.0455922	-0.040024	0.184421	31	-13.9463	-14.3742	0	C766
768	-1.1275	0.54431	-0.42125	0.538243	0.93483	0.502565	0.180073	-1.36221	-0.453478	1.02531	1.21016	0.0340799	-0.903485	1	-1.25923	74.4671	0	C767
769	1.53057	-0.00892367	-0.372276	0.419729	0.467868	-0.239166	-0.0520124	0.363513	-0.247369	-1.11656	-0.228927	-0.613928	0.482746	27	-11.0345	-55.0094	0	C768
770	-1.11431	0.769909	0.0396681	-0.695985	1.20768	0.450724	0.205626	-2.21045	-0.255734	0.973394	2.57849	0.136775	-0.729646	10	27.1833	58.7658	0	C769
771	-1.44095	-0.477515	1.01143	0.924541	-0.90636	-0.0739881	0.561236	1.45913	0.549415	0.407659	-1.19537	0.561493	-0.35011	8	60.0302	-13.7684	0	C770
772	-1.03383	-0.652274	2.09143	0.812882	-1.13351	0.760132	-0.53601	-0.816333	0.831521	1.22183	-1.04362	0.720802	-0.0166692	29	-83.919	-3.21864	0	C771
773	0.512601	-0.725418	0.0912317	0.626609	-1.23457	-0.204873	0.331543	0.040564	0.172388	0.148786	0.119112	0.499243	0.039453	14	55.523	37.3564	0	C772
774	0.332799	0.359361	-0.588445	-0.417054	0.857156	-0.613349	0.282972	0.82377	-0.0929368	-0.343703	0.491915	-0.300128	-0.492064	9	-14.9013	21.6691	0	C773
775	1.20096	-0.0293757	-0.425026	0.0142573	0.47328	-0.481532	0.278752	0.295495	-0.138919	-0.95168	-0.00125379	-0.325079	0.362661	15	-16.5506	-24.5445	0	C774
776	-1.17856	0.369148	0.272646	-0.0903265	0.728561	0.553855	-0.174628	-1.87067	-0.563594	1.12999	2.53794	0.272485	-0.80157	1	7.63629	64.7812	0	C775
777	-0.863843	0.208161	-0.0929699	0.793144	0.514578	0.148047	-0.167147	-0.453186	-0.546634	0.668829	1.53127	-0.305507	-0.992949	4	-8.36164	64.1454	0	C776
778	1.98723	-0.466298	-0.643662	0.204945	0.0108901	-0.0615254	-0.0807002	0.340636	-0.399306	-0.918009	0.125272	-0.367073	0.753019	28	-38.9646	-51.8463	0	C777
779	0.954527	0.663752	-0.444876	0.255734	1.10315	-0.612784	0.448714	-0.201377	-0.0528718	-0.896203	-0.368893	-0.631938	0.166146	24	28.7669	-20.7996	0	C778
780	0.486363	1.02649	-0.285842	-0.175301	1.28243	-0.557941	0.378761	-0.231808	0.0428828	-0.67961	-0.0605832	-0.626982	-0.28883	20	15.0124	24.5991	0	C779
781	1.70158	-0.0884928	-0.419642	0.0629221	0.240329	-0.159884	-0.0299477	0.796415	-0.274533	-0.746554	-0.527418	-0.721193	0.593263	27	-15.0136	-63.744	0	C780
782	-0.0745548	0.469039	0.35555	-0.602023	-0.679292	2.24291	-0.882963	-1.88912	1.13954	2.00714	-1.49707	0.760424	0.469949	6	-71.0944	24.5533	0	C781
783	0.901742	0.485359	-0.496935	0.315773	1.02456	-0.656761	0.327242	0.683158	-0.292986	-0.674339	-0.647879	-0.721383	0.168915	33	29.0541	-9.29187	0	C782
784	-1.19832	-0.362437	2.71489	-0.171754	-0.266939	-0.658731	0.317661	-0.103066	1.32675	-0.475126	-0.868159	0.608082	0.199076	35	14.0495	-73.2392	0	C783
785	1.51328	-0.00204119	-0.421476	0.472145	0.479899	-0.497381	-0.0554214	0.0542074	-0.197184	-0.961424	-0.0558441	-0.508544	0.554655	11	-0.0374936	-56.6068	0	C784
786	-1.32157	-0.257522	2.23866	-0.364354	-0.443073	-0.335299	-0.205268	0.862331	1.5533	-0.00816726	-1.03851	0.455584	-0.0929602	23	25.5176	-69.9194	0	C785
787	0.613049	0.74727	-0.833181	-0.485935	1.42413	-0.627779	0.630437	0.425704	0.0333432	-0.69825	-0.0333243	-0.458526	-0.231398	19	10.2843	19.9615	0	C786
788	1.0848	0.188269	-0.483312	-0.0283906	0.701024	-0.532168	0.30696	-0.0181452	-0.00301598	-0.746323	-0.0258503	-0.240977	0.038055	31	-7.89339	-15.02	0	C787
789	-0.712849	0.502256	-0.400303	-0.474598	0.944688	0.178352	0.0218229	-0.470062	-0.392532	0.771957	1.37556	-0.139229	-0.79783	4	-5.74508	61.3543	0	C788
790	1.2147	0.124716	-0.478569	-0.266375	0.640406	-0.384086	0.196214	0.622943	-0.0615555	-0.822991	-0.178219	-0.446338	0.136435	26	3.25042	-24.0689	0	C789
791	-0.943184	0.240996	1.67969	0.866486	-0.659027	0.389082	-1.09652	0.0191929	-0.171647	0.83681	-0.479105	0.228715	-0.0394531	3	-53.4896	0.234143	0	C790
792	0.842659	0.752436	-0.76845	-0.240284	1.20817	-0.57899	0.58857	0.342915	0.0328476	-0.7587	-0.381555	-0.503501	-0.0749759	33	27.8845	1.27638	0	C791
793	1.82861	-0.319013	-0.535948	0.134189	0.205241	-0.242093	-0.0551658	0.400316	-0.212342	-0.945524	-0.17114	-0.515046	0.87735	27	-23.3158	-66.9655	0	C792
794	-0.943654	0.125699	1.82973	0.929591	-0.938571	0.572581	-0.922355	0.162952	-0.48359	1.03514	-0.694027	0.433871	-0.0759695	3	-56.1636	9.32639	0	C793
795	0.788096	0.256812	-0.733657	-0.448973	0.613682	-0.590007	0.492552	0.0266342	0.285622	-0.63835	0.250796	-0.075821	0.0646447	12	7.41315	-0.101912	0	C794
796	0.311643	0.553594	0.0671519	-0.279819	0.904608	-0.631189	0.224413	0.100314	0.22587	-0.700025	0.0940119	-0.390168	-0.283813	9	-0.309399	22.1516	0	C795
797	1.504	-0.349063	-0.517383	0.384248	-0.0483815	-0.1334	-0.172801	0.64689	-0.488847	-0.803989	0.332234	-0.539494	0.580803	28	-37.6486	-54.9291	0	C796
798	0.994597	0.571215	-0.0898989	0.428312	1.03187	-0.602837	0.320788	0.0112321	-0.188419	-0.792732	-0.372498	-0.772079	-0.185396	33	22.3377	-11.9699	0	C797
799	1.90576	-0.176946	-0.575336	0.21882	0.305987	-0.0582237	-0.0759117	0.316055	-0.472384	-1.07921	-0.183967	-0.447818	0.795065	28	-27.6904	-62.8709	0	C798
800	0.932128	0.161752	-0.430448	-0.296045	0.546652	-0.424749	0.29799	0.19967	-0.102218	-0.674519	0.0148694	-0.129572	0.0960908	31	-13.7876	-13.7388	0	C799
801	-1.16253	-0.678085	0.165566	0.750376	-0.960942	0.0824515	0.37895	-0.227414	0.180896	0.515414	0.772086	0.60737	0.119	14	57.6206	26.0541	0	C800
802	0.634543	0.867592	-0.545401	-0.313414	1.22873	-0.638563	0.572787	-0.146373	0.11861	-0.723935	-0.243436	-0.298788	-0.154228	19	21.9201	14.8012	0	C801
803	1.02901	0.219018	-0.526778	-0.080042	0.673499	-0.466461	0.307825	0.348584	-0.302784	-0.742009	-0.0226257	-0.337317	0.149675	26	-3.89553	-18.9717	0	C802
804	1.28446	-0.299024	-0.304689	0.0515543	0.148344	-0.308934	0.124391	0.0101026	-0.0077072	-0.608768	-0.377207	-0.0127894	0.506219	2	-15.3357	-36.8967	0	C803
805	0.600541	0.645241	-0.816284	-0.0544852	1.23246	-0.686974	0.540017	0.211341	0.134158	-0.79024	-0.21278	-0.266897	-0.126378	19	18.3827	11.7008	0	C804
806	0.764292	0.61222	-0.481034	0.239635	0.997778	-0.620863	0.464822	0.222603	0.0678	-1.06524	-0.433311	-0.304039	-0.10593	33	21.1212	-9.29041	0	C805
807	-1.31716	-0.126261	2.17192	-0.0910473	-0.306425	-0.526047	-0.073197	0.83948	1.61229	-0.274275	-1.07077	0.379833	-0.227534	23	26.2751	-68.8707	0	C806
808	-0.419091	-0.279993	0.321902	-0.528358	-1.30493	1.94289	-1.2208	-2.02782	-0.714557	2.40371	2.75093	1.09207	0.463972	30	-35.418	47.8052	0	C807
809	0.901577	0.267059	-0.637496	-0.377729	0.707035	-0.430099	0.379852	0.471753	-0.0330241	-0.542358	-0.147894	-0.284938	-0.0152661	31	-9.39681	-5.15988	0	C808
810	1.48032	0.135245	-0.644977	0.0967419	0.51731	-0.353123	0.118847	0.209266	-0.28239	-0.864183	-0.0758829	-0.400097	0.393769	2	-17.9268	-39.0519	0	C809
811	0.867341	0.22022	-0.340614	-0.47951	0.835123	-0.515988	0.440541	0.605444	0.0690861	-0.711472	-0.460991	-0.231291	0.000572	12	-9.70251	5.29466	0	C810
812	-1.2817	0.312617	0.281164	1.22386	0.770086	0.459689	0.00122332	-1.85148	-0.460421	1.02832	1.63549	-0.0129518	-1.02547	1	-5.08799	77.9385	0	C811
813	1.20082	0.256949	-0.75175	-0.275506	0.646219	-0.439773	0.269285	0.789662	-0.0299265	-0.831082	-0.37617	-0.377876	0.315558	34	9.25185	-25.1129	0	C812
814	-0.236763	-0.349975	0.0488741	-0.563794	-1.21716	2.0615	-1.20199	-1.89258	-0.767299	2.56568	2.01414	1.23351	0.466107	30	-38.7267	48.4182	0	C813
815	-1.1988	-0.257775	1.16632	0.264627	-0.797516	0.0604126	0.294009	0.87823	0.266853	0.0969996	-0.316636	0.33311	-0.162608	22	50.9368	9.76049	0	C814
816	1.60355	-0.243783	-0.708342	0.0901742	0.235231	-0.224401	-0.0508391	0.601065	-0.167301	-0.876622	0.115311	-0.659265	0.707778	28	-29.3691	-51.9481	0	C815
817	1.8324	-0.153668	-0.689862	0.196789	0.0782472	-0.251542	0.108582	0.443735	-0.243291	-0.875012	-0.526922	-0.204419	0.721894	27	-13.1621	-67.6084	0	C816
818	-0.905944	-0.570111	0.35196	-0.442049	-1.27185	1.0797	-1.01133	0.22348	-0.681324	1.80765	2.03815	0.757745	-0.0958185	32	-26.2514	65.4986	0	C817
819	1.48837	-0.153789	-0.37468	-0.134115	0.408708	-0.163817	0.0070484	-0.0330009	-0.32195	-0.786275	0.244768	-0.395059	0.502316	2	-22.4094	-38.9705	0	C818
820	1.96334	-0.362343	-0.472031	0.30866	0.00129345	-0.04687	-0.0441621	-0.0535892	-0.0861658	-0.912113	-0.116496	-0.609293	0.858929	27	-26.8163	-72.5927	0	C819
821	1.11738	0.141068	-0.44038	-0.312375	0.668012	-0.479864	0.301943	0.486987	-0.290661	-0.748338	-0.0894002	-0.418821	0.354112	26	5.42111	-20.6512	0	C820
822	0.188726	-0.749202	1.06784	-0.105137	-1.03784	1.67541	-0.860313	-1.16228	-0.257675	1.07976	-1.7161	0.716598	2.72709	16	86.4117	-12.988	0	C821
823	1.03414	-0.855054	-0.167753	0.61303	-1.13896	-0.146729	0.277518	-0.497559	0.283205	0.0624229	0.357566	0.273284	0.390226	14	56.5281	40.4955	0	C822
824	-0.99823	0.75804	0.115939	-0.738509	1.23524	0.34282	0.361184	-2.11506	-0.0779996	0.919627	2.30697	-0.0635531	-0.738229	10	23.4603	58.672	0	C823
825	-1.05975	0.557679	-0.172867	-0.454287	1.05511	0.474396	0.173283	-1.34234	-0.478307	1.01456	1.65067	0.189535	-0.855202	7	12.4762	71.5269	0	C824
826	0.975331	-0.0856334	-0.711999	-0.395596	0.417061	-0.343992	0.0889622	0.224959	0.0431441	-0.404521	0.280464	-0.0807531	0.206044	37	-29.9314	-8.97641	0	C825
827	0.741302	0.403429	-0.472017	-0.493299	0.835819	-0.730592	0.333762	0.550762	-0.114186	-0.590289	0.372856	-0.228043	-0.277311	9	-10.1809	15.6672	0	C826
828	0.30839	0.307898	-0.33083	0.0688921	0.811464	-0.748785	0.286388	0.433859	0.0497701	-0.722084	0.085512	-0.114478	-0.230863	12	-3.44842	8.61387	0	C827
829	0.719652	0.0699171	-0.655356	0.270078	0.61795	-0.714426	0.421791	1.23373	-0.119927	-0.874244	-0.340981	-0.0947512	-0.140968	31	-3.94161	-7.84515	0	C828
830	-0.4416	0.266637	0.23171	-0.854262	-1.24201	1.99879	-1.4192	-0.912472	0.202769	1.32022	1.70274	0.172062	0.208113	5	-44.7344	25.1133	0	C829
831	1.341	0.3617	-0.384198	-0.120503	0.787999	-0.442251	0.136236	0.679523	-0.291701	-0.965925	-0.47707	-0.60005	0.39096	34	7.48034	-26.8783	0	C830
832	-1.30952	-0.484407	0.592359	0.660514	-0.919246	0.194157	0.454804	0.0803321	0.461965	0.871652	-0.808749	0.709646	0.224643	38	74.4311	4.38205	0	C831
833	1.21283	-0.0344187	-0.465021	0.115952	0.475786	-0.43442	-0.0105455	0.840528	-0.247961	-0.829582	0.23959	-0.650242	0.111877	18	-34.935	-23.3734	0	C832
834	1.03126	0.283247	-0.767719	-0.206334	0.781701	-0.629007	0.45728	0.729327	0.143466	-0.846366	-0.415041	-0.428331	0.285372	31	-2.69708	-6.03165	0	C833
835	1.37531	-0.0453183	-0.733127	-0.182322	0.210873	-0.300173	0.203508	0.423456	-0.19764	-0.73864	0.156364	-0.182114	0.317868	15	-22.1711	-29.5036	0	C834
836	-0.846872	-0.584488	0.78176	-0.490331	-1.20441	1.49507	-1.12702	0.00160219	-0.880459	2.25213	0.877815	0.799585	0.285593	32	-33.8675	55.7011	0	C835
837	1.62355	-0.228732	-0.808379	-0.033962	0.425063	-0.219991	-0.00765833	0.541085	-0.068825	-0.882756	0.00899554	-0.475905	0.559118	2	-26.5752	-40.4033	0	C836
838	1.27779	-0.179535	-0.754623	-0.273786	0.316548	-0.421576	0.0948128	0.742278	-0.354455	-0.469416	0.403522	-0.332685	0.287779	37	-31.7406	-14.5002	0	C837
839	-1.09888	0.141681	1.43126	-0.0908612	-0.299669	-0.261828	-0.171077	1.10609	1.77229	0.15924	-0.978642	-0.159702	-0.632442	23	35.7652	-64.3467	0	C838
840	1.36708	-0.145183	-0.145054	-0.118633	0.445539	-0.32042	0.0885033	0.208277	-0.279612	-0.739672	0.253815	-0.610534	0.264973	37	-25.3697	-23.6138	0	C839
841	1.01057	0.182325	-0.468514	-0.0456121	0.562823	-0.450907	0.24623	0.501414	0.0643391	-0.818901	-0.350371	-0.353772	0.168311	34	7.44423	-29.6718	0	C840
842	1.12516	0.486416	-0.61326	-0.216316	0.962289	-0.563501	0.551862	0.158654	0.176902	-0.91439	-0.476374	-0.39207	0.129358	24	31.0295	-23.5822	0	C841
843	1.1244	0.404378	-0.555175	-0.0883298	0.818639	-0.45172	0.32035	0.187055	0.19889	-0.936767	-0.554652	-0.134389	0.0184994	24	30.2591	-25.5329	0	C842
844	1.03502	0.61859	-0.873103	0.282701	1.0862	-0.54131	0.491289	0.141764	-0.0631882	-0.901806	-0.260155	-0.561278	0.0112767	24	28.4426	-18.2217	0	C843
845	-1.01387	0.499412	-0.471025	-0.4829	1.03444	0.542407	0.179717	-1.44881	-0.389066	1.14251	1.46544	0.165472	-0.478661	7	13.6278	70.7694	0	C844
846	1.24127	0.314117	-0.680356	-0.0122498	0.765424	-0.322796	0.0989845	0.684461	-0.31563	-0.835413	-0.22945	-0.57403	0.223013	26	5.67571	-22.9802	0	C845
847	1.21058	0.547308	-0.871216	-0.0890366	1.15845	-0.380805	0.336892	0.312688	-0.176848	-0.836823	-0.255138	-0.649845	0.152553	24	26.6558	-14.312	0	C846
848	-0.200076	0.25702	0.214017	-0.816468	-1.29335	2.28048	-1.19203	-2.20275	-0.701238	2.14272	2.53224	0.986597	0.480329	30	-35.1315	45.6185	0	C847
849	0.914498	0.652129	-0.922688	-0.247575	1.14644	-0.614811	0.421083	0.281621	-0.138712	-0.68927	0.197774	-0.516806	-0.017837	19	13.8124	8.21266	0	C848
850	0.996385	-0.0422353	-0.620007	-0.0298445	0.30162	-0.411698	0.105921	0.552623	-0.0920063	-0.731455	0.281787	-0.257082	0.171342	37	-32.4002	-12.0273	0	C849
851	-0.9601	1.06251	-0.66876	-0.544902	1.39029	0.469526	0.519583	-1.97354	0.0471619	1.03388	1.38191	0.16967	-0.830214	7	19.4615	76.6133	0	C850
852	1.30981	0.18454	-0.862476	0.0722661	0.595076	-0.5551	0.341976	0.37194	-0.0769698	-0.987827	-0.220278	-0.190154	0.419301	34	8.34525	-34.9663	0	C851
853	0.614226	0.310389	-0.569212	-0.312928	0.964702	-0.627532	0.603097	0.778934	-0.0377211	-0.650195	-0.342673	-0.263789	-0.134936	12	5.63306	13.3321	0	C852
854	-1.23194	-0.437962	3.82031	-0.0148218	-0.437512	-0.749411	-0.305206	-0.718615	1.41009	-0.422423	-0.00899478	0.449775	-0.149138	35	11.2539	-88.9673	0	C853
855	-0.909589	0.341544	1.31542	0.207304	0.0603452	-0.321482	-0.109397	-0.305252	0.553218	-0.109153	0.211472	0.105609	-0.56947	23	21.829	-57.3031	0	C854
856	-1.05709	-0.240058	1.85332	-0.103522	-0.192939	-0.255374	-0.136648	1.23531	1.02555	0.25206	-0.756948	0.054374	-0.854123	23	31.2731	-57.0655	0	C855
857	1.09303	0.109557	-0.326854	0.0422	0.564819	-0.476812	0.256193	0.333656	-0.0739414	-0.872089	-0.0163978	-0.428664	0.0464321	15	-5.17693	-21.033	0	C856
858	-0.934921	0.39891	0.257412	-0.675312	0.852686	0.592184	0.0184434	-2.07	-0.334083	1.18093	2.76305	0.122094	-0.799512	10	29.5515	62.678	0	C857
859	2.11638	-0.45262	-0.466494	0.610756	0.0335619	0.0356766	-0.166305	0.13159	-0.365991	-0.96035	-0.478963	-0.451648	0.958421	27	-28.6274	-70.64	0	C858
860	0.892461	0.334339	-0.42727	0.0120023	0.677223	-0.710117	0.370127	0.583904	0.00964854	-0.819566	-0.213409	-0.456078	0.0508481	26	13.832	-18.046	0	C859
861	0.762175	0.478703	-0.541381	-0.14805	1.0292	-0.559936	0.461636	0.00619961	0.0537188	-0.709327	-0.230128	-0.162579	-0.153787	12	11.5829	3.01927	0	C860
862	1.32367	-0.15781	-0.660541	0.0444451	0.265257	-0.236423	0.206364	0.286443	-0.229796	-0.826068	0.136719	-0.216818	0.345533	18	-28.4199	-35.2377	0	C861
863	-0.255897	0.446891	0.496709	-0.687605	-0.558515	2.08347	-0.57291	-2.06404	1.43992	1.98513	-1.50999	0.958505	0.353784	6	-70.7884	21.9635	0	C862
864	-1.28209	0.106945	1.01333	0.404617	-0.256927	-0.43764	-0.0077238	0.215054	1.56234	-0.214171	-0.680161	0.424873	-0.111358	23	23.3533	-56.4264	0	C863
865	1.51089	-0.31635	-0.29658	-0.0418402	0.273923	-0.461863	-0.060362	0.450713	-0.2735	-0.865992	0.595361	-0.52794	0.379198	18	-40.3921	-31.2894	0	C864
866	-1.029	0.739779	0.052641	-0.782054	1.33036	0.453626	0.376842	-2.41208	-0.0176322	1.04462	2.44141	0.154849	-0.681443	10	27.3669	55.5405	0	C865
867	1.79969	0.252975	-0.601307	0.275935	0.688962	-0.230699	0.0535726	0.480937	-0.514832	-0.942801	-0.383808	-1.07268	0.791454	11	0.37487	-62.3143	0	C866
868	-0.938594	0.605876	-0.105417	0.39043	1.06228	0.0196023	0.179688	-0.44966	-0.284886	0.528753	0.689579	-0.359458	-0.964959	1	-4.98787	65.4781	0	C867
869	1.12422	0.0588603	-0.347438	-0.129499	0.582215	-0.528401	0.261173	0.680723	-0.0494483	-0.95215	-0.420731	-0.234818	0.26208	34	4.02679	-29.5072	0	C868
870	-1.08479	-0.338894	3.13055	-0.294257	-0.325601	-0.7452	-0.128042	-0.235596	1.55486	-0.672784	-0.717949	0.561481	0.440455	35	10.9946	-79.7339	0	C869
871	1.48357	-0.200177	-0.46132	0.148851	0.305649	-0.332153	-0.0265279	0.462044	-0.342329	-0.718556	0.139338	-0.555476	0.414839	18	-40.7247	-34.8341	0	C870
872	-1.06091	-0.481992	0.231224	0.395047	-1.06974	0.316542	0.255534	0.443254	0.165053	0.843054	-0.58535	0.613258	0.466775	38	80.2745	1.7236	0	C871
873	-1.31117	-0.742452	0.428845	0.381842	-0.676887	0.109352	0.50334	1.6362	0.341641	0.487796	-1.01047	0.557457	0.153853	8	53.6723	-9.66374	0	C872
874	0.342294	0.652209	-0.674846	-0.514064	1.21052	-0.700697	0.668608	0.367856	0.188314	-0.573873	-0.187911	-0.233489	-0.166185	19	11.7126	18.3057	0	C873
875	1.49999	0.190136	-0.7504	-0.0186729	0.702552	-0.272476	0.300971	-0.0223817	-0.09446	-0.921513	-0.484754	-0.226287	0.492217	11	6.11901	-53.7099	0	C874
876	-0.439125	0.343551	0.154012	-0.640718	-0.681078	1.99695	-0.804519	-1.43648	1.14589	2.10836	-1.37501	0.893511	0.159629	6	-64.3886	21.3762	0	C875
877	-0.922029	0.722291	-0.339226	-0.317694	1.17534	0.535472	0.372909	-1.71217	-0.202748	1.16599	0.877414	0.0867917	-0.680357	7	8.66757	78.6425	0	C876
878	1.42488	0.176732	-0.37394	0.0678532	0.644657	-0.314643	0.142389	0.280114	-0.299489	-1.0426	0.0508579	-0.776874	0.390817	2	-17.3685	-42.6985	0	C877
879	0.717848	0.525294	-0.685701	-0.332617	1.17781	-0.723383	0.500904	0.191492	0.00457977	-0.59605	0.0313561	-0.350111	-0.101396	19	14.1591	10.3865	0	C878
880	1.77788	-0.205155	-0.423618	0.754792	0.0571884	-0.168107	-0.22121	0.367802	-0.266143	-1.06515	-0.118504	-0.62325	0.599066	27	-21.4185	-63.0828	0	C879
881	2.02201	-0.144677	-0.426314	0.549929	0.397089	0.030746	-0.156013	0.193349	-0.674581	-1.08949	-0.387652	-0.542323	0.792168	27	-19.7247	-63.6724	0	C880
882	-1.24361	0.672983	1.13279	2.37259	-0.551314	0.779495	-1.13577	-1.95832	-0.514319	1.36368	0.899221	0.236606	-0.453602	29	-92.2934	-0.807159	0	C881
883	1.63396	-0.428824	-0.579607	0.42282	-0.0638297	-0.413235	-0.01633	0.447893	-0.0577451	-0.916771	0.0364698	-0.249954	0.570564	28	-32.3486	-47.8118	0	C882
884	1.23619	0.195876	-0.753825	-0.101433	0.802513	-0.453254	0.283633	0.474639	-0.145381	-0.791362	-0.269859	-0.370018	0.244513	34	9.4278	-26.5612	0	C883
885	0.871739	0.717661	-0.911985	-0.290113	1.37593	-0.417987	0.541735	-0.129768	0.238003	-0.691778	-0.557758	-0.336128	0.0653949	33	34.514	-1.47772	0	C884
886	-0.137322	0.571794	-0.432113	-0.563315	0.991658	-0.693623	0.523552	0.471119	0.260216	-0.484752	0.316712	-0.07381	-0.439391	9	-10.8675	30.655	0	C885
887	-1.34896	0.267216	1.54388	-0.416453	-0.172412	-0.265802	-0.315817	0.852868	1.89675	0.192242	-0.761768	0.06507	-0.65432	23	35.0718	-64.7029	0	C886
888	-0.740796	0.526153	-0.426191	0.00959441	1.08068	0.259784	0.297771	-1.06912	-0.397189	0.759821	1.61847	-0.0678408	-1.19003	1	1.85399	67.391	0	C887
889	1.42142	-0.269056	-0.175288	0.0432348	0.239314	-0.127537	-0.321763	0.485891	-0.472568	-0.621613	0.272555	-0.533679	0.335913	18	-41.5546	-33.3571	0	C888
890	1.11605	0.16097	-1.01625	-0.193525	0.609007	-0.514431	0.322522	0.772821	-0.0147182	-0.827526	0.0540606	-0.255125	0.20629	31	-6.05883	-9.0546	0	C889
891	0.137484	0.86372	-0.618395	-0.484599	1.31675	-0.555184	0.610267	0.457705	0.102622	-0.558456	-0.214588	-0.238624	-0.446089	20	6.74446	29.5638	0	C890
892	0.88419	0.0339565	-0.126114	0.523703	0.69159	-0.570919	0.269029	0.421997	0.0796928	-0.96184	-0.790835	-0.127923	-0.00876555	34	25.1708	-38.1798	0	C891
893	1.07298	0.559503	-0.632686	0.0438535	0.8988	-0.591286	0.380653	0.355136	-0.0429152	-0.980617	-0.0924342	-0.559986	-0.0285841	24	22.7687	-17.3463	0	C892
894	-1.16481	-0.174688	1.16237	-0.0411854	-0.26482	-0.101871	-0.139507	1.57395	1.08733	0.324204	-0.80679	-0.16851	-0.570248	23	35.7628	-58.7517	0	C893
895	1.73836	0.0431206	-0.225839	0.303111	0.490642	-0.196877	-0.0897115	0.559365	-0.607674	-0.891594	-0.325655	-0.996096	0.714942	27	-19.9816	-58.9239	0	C894
896	-0.671739	0.466372	-0.84218	-0.313381	0.859972	0.462365	0.0597729	-0.053439	-0.482803	1.03342	0.526106	0.0273897	-0.696867	4	-5.23738	57.9453	0	C895
897	-0.279723	1.14569	-0.480112	-0.363702	1.55904	-0.875569	0.82204	0.446735	0.26144	-0.531361	-0.154409	-0.301227	-0.720977	20	12.6984	36.4647	0	C896
898	1.41158	-0.150776	-0.196857	0.952891	0.264513	-0.41681	0.0212953	0.251608	-0.322732	-1.02089	-0.105781	-0.637589	0.342582	2	-16.4261	-52.1247	0	C897
899	-1.47584	-0.385116	3.26379	-0.322824	-0.494206	-0.383328	-0.286752	-0.0977164	1.70102	-0.311787	-0.920746	0.687056	0.309962	35	13.6914	-79.4877	0	C898
900	1.12617	0.0558297	-0.801037	-0.105669	0.558087	-0.365107	0.16921	0.341967	-0.164245	-0.480019	0.236105	-0.369858	0.0641775	37	-21.7368	-11.6889	0	C899
901	1.111	0.337367	-0.951212	0.0264597	0.729605	-0.409472	0.168566	0.796806	-0.27717	-0.860678	0.079372	-0.473952	0.145105	26	-0.910574	-15.9063	0	C900
902	0.0555536	0.404465	0.125274	-0.630374	-1.30422	2.54679	-1.3292	-1.34182	-0.716091	2.11823	0.119077	0.759275	0.775692	36	-51.1197	45.7114	0	C901
903	1.16047	0.160531	-0.398576	0.366277	0.647463	-0.414842	0.228681	0.239662	-0.174014	-0.895814	-0.364658	-0.433345	0.159296	34	17.6773	-32.021	0	C902
904	0.681038	0.484206	-0.697365	-0.483508	0.866892	-0.743208	0.439034	0.494538	0.0353925	-0.59729	0.281703	-0.340213	-0.0612563	9	-7.24935	17.1443	0	C903
905	1.46259	0.0115933	-0.623309	0.804249	0.426594	-0.300827	0.0344003	0.10337	-0.293992	-0.9542	-0.241424	-0.481123	0.444109	11	-1.04265	-57.2201	0	C904
906	1.66328	-0.227973	-0.821654	0.00740764	0.450621	-0.317412	0.10887	0.886702	-0.344883	-0.854534	-0.170769	-0.586379	0.736701	27	-12.1504	-61.4651	0	C905
907	0.729738	0.0706932	-0.361581	-0.0734155	0.393634	-0.525952	-0.00653351	0.628387	-0.339895	-0.375171	0.551996	-0.408233	-0.0901256	21	-27.2506	9.10833	0	C906
908	-1.30119	-0.257072	1.86031	-0.0854806	-0.595665	0.0785262	-0.247694	0.40705	1.54553	0.32633	-0.564349	-0.107059	-0.163895	23	27.9556	-63.4628	0	C907
909	-0.923576	0.536495	-0.317385	-0.537497	1.15067	0.711641	0.24824	-1.13681	-0.23371	1.26762	0.437079	0.0468841	-0.643394	7	13.57	69.8363	0	C908
910	1.71418	-0.836818	0.0319105	0.768327	-1.1644	0.0519703	-0.609208	1.53636	-0.670923	-0.288107	0.27433	-0.500167	0.51141	30	-26.1233	32.8946	0	C909
911	0.440074	0.855069	-0.941561	-0.0981779	1.41705	-0.653271	0.746559	-0.094114	0.152022	-0.663688	-0.0300079	-0.273253	-0.35265	19	20.088	25.5796	0	C910
912	1.76583	-0.644265	-0.543717	0.0480143	-0.504638	-0.0357312	-0.26502	1.01059	-0.249742	-0.518765	0.260228	-0.479261	0.622051	28	-44.4956	-51.5163	0	C911
913	0.704767	0.290254	-0.47989	0.116314	0.854478	-0.544103	0.382335	0.321848	-0.0697269	-0.678423	-0.15439	-0.283536	-0.228421	12	-2.47277	5.62549	0	C912
914	-1.06081	0.606345	-0.193986	0.0350984	1.15199	0.300921	0.108928	-1.13349	-0.536844	0.853093	1.57189	-0.0622801	-0.965413	1	1.59984	67.6566	0	C913
915	-0.927801	-0.054697	0.338513	0.44723	-0.839472	0.149115	-0.610103	1.69121	0.293542	0.55197	0.808998	-0.329228	-0.759875	22	36.8543	20.3123	0	C914
916	1.66525	-0.625719	-0.583907	-0.0379179	-0.119669	-0.0623996	0.144364	0.525936	-0.278462	-0.718249	-0.144685	-0.0995555	0.710825	28	-40.3443	-46.265	0	C915
917	0.635636	0.760023	-0.880296	-0.34819	1.1991	-0.770886	0.757457	0.277698	0.172138	-0.744653	0.108897	-0.28953	-0.370762	19	14.1614	14.8652	0	C916
918	-0.941313	-0.201603	2.15694	-0.164378	-0.206371	-0.359988	-0.455411	0.302356	1.25285	-0.0232117	-0.830007	0.264242	-0.0946884	23	24.1149	-67.0551	0	C917
919	1.42768	0.132699	-0.620869	-0.190803	0.397521	-0.30961	0.171522	0.183533	-0.265334	-0.687314	0.0551802	-0.364603	0.349089	2	-19.7543	-35.809	0	C918
920	-1.59253	-0.917903	1.33136	2.7206	-0.688705	-0.126629	-0.24586	1.48854	-0.103094	0.212149	0.268918	-0.123917	-0.789053	22	36.474	34.8169	0	C919
921	-0.987082	-0.582171	0.013806	0.482461	-0.956327	-0.278867	0.0655157	1.85931	-0.0864668	0.377914	0.842136	0.297266	-0.424792	22	42.1115	17.3161	0	C920
922	1.34553	0.112819	-0.494277	0.207403	0.700215	-0.319139	0.168047	0.0551116	-0.114406	-0.983111	-0.104292	-0.502595	0.243433	11	3.59903	-48.5789	0	C921
923	1.55421	0.260215	-0.925265	0.252993	0.652586	-0.3565	0.0228379	0.500185	-0.292713	-1.01329	-0.0723539	-0.637951	0.56776	27	-11.5811	-59.0147	0	C922
924	1.27922	-0.309758	-0.586491	-0.215812	0.209149	-0.295424	0.0331571	0.563655	-0.285879	-0.576624	0.508051	-0.280633	0.221593	18	-44.7648	-26.4625	0	C923
925	1.2398	-0.00373596	-0.478682	-0.10111	0.572435	-0.411091	0.519972	0.110751	0.0796737	-0.921074	-0.556672	-0.0733507	0.342272	34	2.9696	-34.3774	0	C924
926	0.845231	0.53114	-0.752708	-0.364102	0.956062	-0.644859	0.446479	0.336484	0.261851	-0.675308	-0.109442	-0.434288	-0.0285358	12	9.47391	5.80733	0	C925
927	1.12363	0.33654	-0.488876	0.210902	0.618596	-0.545646	0.229307	0.173288	-0.190077	-0.987896	0.0148225	-0.40071	0.205535	15	-8.81153	-21.9119	0	C926
928	1.43811	0.25097	-0.38361	-0.127312	0.582945	-0.407877	0.187295	0.63436	-0.255745	-0.785484	-0.401764	-0.756311	0.396522	15	-3.35863	-35.2194	0	C927
929	1.44558	-0.601339	-0.194888	0.45887	-0.223247	-0.120069	-0.159662	0.661856	-0.539174	-0.742594	0.333713	-0.456419	0.51539	28	-41.8977	-54.1641	0	C928
930	1.20806	0.435744	-0.571773	0.28339	0.831357	-0.47617	0.28906	0.17016	-0.129939	-0.950629	-0.535491	-0.404738	0.230275	34	22.1677	-36.0966	0	C929
931	-0.188088	0.383802	0.220228	-0.905879	-1.13291	2.37977	-1.64638	-1.9594	-0.672415	1.95426	2.36536	0.752057	0.691794	30	-36.2997	44.3785	0	C930
932	-0.854935	0.0641659	1.68273	0.925668	-0.764545	0.247163	-0.758954	-0.0586413	-0.321771	0.762989	-0.442431	0.251788	0.0489122	3	-53.245	7.30961	0	C931
933	1.92765	-0.180038	-0.422969	0.25437	0.219114	0.0391883	-0.0489135	0.341257	-0.518711	-0.851177	-0.536909	-0.575224	0.818881	27	-20.5831	-67.6493	0	C932
934	1.63454	0.0776839	-0.480776	0.0692677	0.581182	-0.344282	-0.0416221	0.449181	-0.453601	-0.721155	-0.201332	-0.8006	0.627183	2	-17.4678	-45.6049	0	C933
935	-1.14583	-0.623984	0.366729	0.103986	-1.16789	0.662536	0.473761	-0.0230018	0.503204	1.22906	-0.730474	0.911034	0.241318	25	82.0517	10.1639	0	C934
936	1.83429	-0.168639	-0.618559	0.284899	0.213801	-0.0917114	-0.0258108	0.235606	-0.571905	-0.876391	0.0135909	-0.47786	0.666737	28	-28.5078	-62.2785	0	C935
937	-0.434348	0.170187	0.192381	-0.88595	-1.15402	1.86516	-1.48935	-0.493824	0.304821	1.27692	1.57199	0.186479	0.0123687	5	-46.4741	22.6379	0	C936
938	1.75517	-0.317549	-0.330145	0.253329	0.0625312	-0.127983	-0.135788	0.248284	-0.456431	-1.00414	0.137211	-0.391844	0.676124	27	-26.7147	-61.6377	0	C937
939	-1.2329	0.0504089	1.65687	-0.692351	-0.237266	0.137475	-0.484838	1.30952	1.70808	0.638767	-1.36554	0.0135445	-0.399525	23	34.5786	-62.144	0	C938
940	1.1432	0.217279	-0.341364	-0.0720615	0.736691	-0.299286	0.16489	-0.0351943	-0.450674	-0.821876	0.151733	-0.374485	0.233793	15	-9.35779	-26.5777	0	C939
941	0.603278	0.303586	-0.864511	-0.287443	0.696801	-0.611626	0.503136	0.409568	0.185526	-0.562803	0.233714	-0.245935	-0.049477	21	-15.1952	9.61667	0	C940
942	-0.181298	0.399648	-0.132828	-0.535362	0.791204	-0.523828	0.424315	1.08187	-0.116627	-0.261867	0.166596	-0.0399233	-0.781321	9	-16.8239	26.4502	0	C941
943	-0.53031	-0.133102	-0.0115822	-0.60271	-1.32786	1.78909	-0.650181	-1.85362	-0.315085	1.66269	2.3083	0.770506	0.447228	30	-40.6361	33.7154	0	C942
944	1.28871	-0.021322	-0.679962	0.357918	0.516041	-0.513705	0.240771	0.661246	-0.0890735	-0.813746	-0.753283	-0.214499	0.424627	11	-1.93029	-40.8841	0	C943
945	-0.752014	-0.785795	0.544185	0.995323	-0.709338	-0.187791	0.477454	-0.995678	0.697065	0.235115	0.337909	0.725054	-0.0221977	14	61.3213	33.504	0	C944
946	1.4003	-0.113846	-0.896877	-0.133105	0.327434	-0.390886	0.136463	0.630952	-0.156504	-0.807893	0.246849	-0.266685	0.41903	18	-28.4981	-31.9731	0	C945
947	0.387744	0.209967	-0.315595	-0.419165	0.838497	-0.592802	0.332114	0.664164	-0.0406157	-0.530819	0.232181	-0.351485	-0.176912	9	-16.3826	18.5591	0	C946
948	-1.26836	-0.284003	2.13672	-0.213865	-0.18808	-0.45239	-0.252281	0.416124	1.47781	-0.0851308	-1.03834	0.407714	0.268743	23	23.8248	-70.0556	0	C947
949	-0.137329	-0.98527	0.186979	1.00862	-0.948459	-0.170895	0.317562	-0.848479	0.434803	0.105111	0.506207	0.676086	0.41652	14	58.4771	36.5762	0	C948
950	0.9627	-0.372576	-0.31663	-0.14435	0.307972	-0.480395	0.482373	0.209995	0.371478	-0.606039	-0.307525	-0.0337724	0.136389	31	-14.21	-16.3027	0	C949
951	1.15013	-0.629297	1.99918	0.242111	-0.577949	0.6007	-0.800943	-0.965968	-0.0220432	0.907505	-1.39362	0.0794193	0.486594	3	-53.8014	-13.0536	0	C950
952	1.29809	-0.0307746	-0.65188	-0.170059	0.380153	-0.341176	0.323635	0.579502	-0.188735	-0.688238	-0.393321	-0.095916	0.268002	15	-12.2658	-34.3196	0	C951
953	-1.19844	-0.433062	3.35173	-0.219203	-0.378439	-0.568631	-0.128404	-0.577901	1.46353	-0.641875	-0.825604	0.862371	0.545944	35	7.52578	-84.4393	0	C952
954	1.43908	-0.436124	-0.189416	0.767259	-0.0150435	-0.476189	0.0460799	0.511353	-0.264865	-0.759745	-0.496503	-0.232529	0.448389	2	-12.4251	-51.9433	0	C953
955	-0.878563	0.0899483	1.59363	0.926668	-0.560107	0.169189	-0.891105	-0.148307	-0.314393	0.975475	-0.529457	0.456464	-0.0910396	3	-52.6626	-2.42437	0	C954
956	-0.966992	1.06524	-0.468442	-0.512357	1.42396	0.449706	0.564113	-1.63895	-0.190856	0.904433	1.23736	-0.0578931	-0.899867	7	13.8201	79.2626	0	C955
957	1.08327	0.326804	-0.595619	-0.0144206	0.800331	-0.495829	0.296405	-0.010792	0.123831	-0.935497	-0.0127007	-0.456702	0.207046	26	6.09376	-10.2427	0	C956
958	0.371534	-0.0438201	-0.191327	0.226111	0.515406	-0.637997	0.304232	0.278194	0.0170483	-0.702994	0.29235	-0.12219	-0.153937	21	-28.9863	0.719306	0	C957
959	1.01631	-0.0562006	-0.412678	0.15691	0.445327	-0.370253	0.0123272	0.547419	-0.23962	-0.65581	0.344112	-0.493668	-0.0678863	37	-33.1444	-3.61847	0	C958
960	-1.0719	-0.20342	2.81976	-0.287327	-0.469129	-0.593267	-0.0896861	0.0343943	1.48453	-0.460889	-0.669251	0.439572	0.105745	35	16.6749	-76.7058	0	C959
961	1.26983	-0.177385	-0.301685	0.147575	0.203482	-0.485553	0.0373153	0.839054	-0.266756	-0.673923	0.0570793	-0.691881	0.359031	18	-38.147	-22.3025	0	C960
962	-0.469402	-0.738603	0.814271	-0.578628	-1.1326	1.43065	-0.977421	-1.66736	-0.330685	2.37121	1.79676	1.10262	0.112184	32	-38.0969	56.0664	0	C961
963	1.07851	0.127059	-0.517052	-0.182627	0.724925	-0.560691	0.462013	-0.0658749	-0.0529615	-0.788126	0.271883	-0.29038	0.0811179	12	5.90328	-2.76725	0	C962
964	1.40913	0.36829	-0.92273	-0.0576974	0.904439	-0.353385	0.268654	0.25126	-0.122001	-0.856586	-0.383722	-0.525397	0.48462	34	13.4311	-41.3791	0	C963
965	-1.27677	0.674898	0.17007	0.959943	1.13535	-0.026878	0.129699	-1.70012	-0.182461	0.442667	1.89391	-0.228587	-1.04337	1	-2.15642	78.1341	0	C964
966	-0.899907	-0.0388833	1.9308	-0.11714	-0.351349	-0.467501	-0.17503	0.42003	1.69765	-0.00152998	-0.595061	-0.25337	-0.408534	23	25.3359	-64.8341	0	C965
967	1.59275	-0.379138	-0.572185	0.269621	0.287282	-0.1852	0.126237	0.319468	-0.242892	-0.969657	-0.149242	-0.340287	0.619502	2	-29.7624	-47.2278	0	C966
968	1.65261	-0.26337	-0.523221	0.133584	0.299937	-0.304198	0.1284	0.32683	-0.219444	-0.888844	-0.355967	-0.233168	0.592368	27	-13.1855	-66.75	0	C967
969	1.87225	-0.242818	-0.292913	0.0754859	-0.0835902	-0.0342681	-0.151711	1.22375	-0.418737	-0.823953	-0.66323	-0.582018	0.643194	28	-30.723	-56.384	0	C968
970	1.62618	-0.144531	-0.354918	-0.0148352	0.568121	-0.399677	0.126261	0.362829	-0.411709	-0.803092	-0.115041	-0.449344	0.352884	2	-16.5677	-45.4315	0	C969
971	-0.492365	0.195923	-0.292182	0.0164928	0.520669	0.320728	-0.276992	0.0508418	-0.693757	0.862392	0.948464	-0.0791143	-0.815211	4	-9.27921	56.9306	0	C970
972	-0.326841	-0.477292	0.592484	-0.608219	-1.4951	2.08474	-1.18893	-1.86725	-0.474423	2.52617	1.85586	1.10424	0.534354	30	-40.804	48.6756	0	C971
973	1.28253	0.0976644	-0.673207	-0.0844383	0.436994	-0.5323	0.318974	0.187462	-0.116137	-0.859717	0.133201	-0.223202	0.330003	15	-14.2115	-26.5097	0	C972
974	-1.09943	0.532408	-0.0601045	-0.842822	0.889419	0.394357	0.16917	-1.72833	-0.151952	0.977528	2.86529	0.0434277	-0.786515	10	22.8938	62.7904	0	C973
975	1.53673	-0.0960248	-0.530734	0.2169	0.219802	-0.304622	-0.0450922	0.659973	-0.195331	-0.949685	-0.114307	-0.551377	0.529295	28	-28.7876	-49.7784	0	C974
976	1.48228	-0.141836	-0.327879	0.0486996	0.0466923	-0.325726	-0.302573	0.763649	-0.725383	-0.723673	0.599042	-0.391199	0.366009	18	-43.2522	-29.5029	0	C975
977	0.910506	0.248511	-0.897701	-0.212311	0.817964	-0.619566	0.522862	0.36478	0.102898	-0.774307	-0.136985	-0.179496	0.2332	26	10.0872	-5.77481	0	C976
978	-0.634733	-0.239299	0.905571	0.0299326	-0.130749	-0.489712	0.386723	0.23264	1.32136	0.0170691	-1.31818	0.76398	-0.248481	23	35.2923	-51.6336	0	C977
979	-1.0263	0.682423	-0.0710523	0.563879	0.981598	0.136481	0.12261	-1.23966	-0.153143	0.828173	0.88517	-0.0154174	-1.08639	1	-3.58358	69.2969	0	C978
980	0.522995	1.15806	-0.94895	-0.142877	1.57031	-0.553276	0.674997	0.124219	0.224998	-0.71343	-0.521299	-0.439115	-0.395992	19	25.5364	22.6533	0	C979
981	-1.08271	-0.629719	0.470618	-0.529623	-1.17345	1.00023	-1.06798	1.03159	-0.713742	1.60185	1.97933	0.613512	-0.259822	32	-22.9479	68.9788	0	C980
982	0.771359	0.537073	-0.600451	-0.0657028	1.17381	-0.697456	0.543613	0.547727	-0.0535814	-0.821754	-0.538984	-0.305659	-0.0817525	33	23.664	-4.34531	0	C981
983	0.347464	0.339939	-0.314111	0.441147	0.777493	-0.634197	0.394836	0.346339	0.178402	-0.789403	-0.34149	-0.147702	-0.358572	12	-3.93348	9.23977	0	C982
984	0.883012	0.182168	-0.376772	0.358177	0.501619	-0.536152	0.283333	0.222191	0.136444	-0.724827	-0.163681	-0.255962	-0.290489	31	-6.58294	-0.199252	0	C983
985	1.70178	0.203695	-0.750612	0.398158	0.63784	-0.275287	0.183359	0.757099	-0.498863	-0.851832	-0.748703	-0.730844	0.556458	27	-8.52043	-59.1176	0	C984
986	1.15849	-0.999866	0.0539052	0.30274	-1.235	-0.0716174	-0.0282138	0.754661	-0.150833	-0.132933	0.411937	0.188191	0.26981	30	-24.4462	31.5554	0	C985
987	1.08158	0.32862	-0.331014	0.0703673	0.784819	-0.367401	0.0128352	0.404131	-0.325526	-0.860222	0.209323	-0.74924	0.0443858	37	-24.0772	-20.0104	0	C986
988	0.578854	0.657956	-0.662678	-0.427533	1.18211	-0.557108	0.553648	0.654294	0.0376716	-0.655717	-0.453132	-0.501739	0.00372763	33	29.5943	1.04703	0	C987
989	1.72695	-0.557548	-0.228129	0.157441	-0.32047	-0.178677	0.0188447	0.305654	-0.16188	-1.0234	0.0418792	-0.0962187	0.682794	28	-37.4025	-45.3519	0	C988
990	0.633815	0.170284	-0.344284	0.111424	0.66882	-0.571897	0.173004	0.576806	-0.2682	-0.771313	0.598433	-0.531632	-0.194061	21	-26.5329	7.37498	0	C989
991	0.827449	0.410472	-0.606717	-0.0806361	0.869636	-0.604526	0.280626	0.454528	-0.0753263	-0.775895	-0.195613	-0.307572	0.0990173	26	14.4907	-14.6384	0	C990
992	0.758947	-0.135055	-0.340038	0.525214	0.440288	-0.786475	0.0701146	0.983944	-0.37357	-0.63915	0.104793	-0.446355	0.138036	37	-38.6652	-17.5705	0	C991
993	1.57145	0.0978933	-0.53317	-0.0286092	0.617197	-0.324443	-0.0152077	0.284087	-0.410082	-0.890076	-0.0309464	-0.569139	0.598008	2	-17.9314	-44.2023	0	C992
994	1.82408	-0.269006	-0.466584	0.574709	0.143636	-0.14019	-0.191389	0.250944	-0.563229	-0.836385	0.137449	-0.803753	0.81719	28	-33.3193	-62.7384	0	C993
995	-0.994111	-0.590823	0.386423	0.775562	-1.08741	0.63709	0.537264	-0.162564	0.411671	0.850365	-1.19734	0.7923	0.512784	25	80.5304	16.149	0	C994
996	-0.303357	0.265127	0.528628	-0.965285	-0.973963	2.01203	-1.38445	-1.31569	0.823839	1.48548	0.463355	0.354023	0.243639	5	-52.4594	25.2559	0	C995
997	1.48903	0.249191	-0.827456	0.248894	0.685078	-0.431217	0.163289	0.453301	-0.369558	-1.02119	-0.0345939	-0.531291	0.385584	11	4.74104	-45.5557	0	C996
998	-0.00980432	0.0823795	0.333202	-0.628507	-0.808886	2.32872	-1.15557	-1.82915	-0.409096	2.37216	-0.152881	1.10546	0.431974	36	-52.387	43.0475	0	C997
999	-1.31032	-0.843458	0.620182	0.548066	-1.24258	0.147685	0.231086	1.56387	0.377665	0.244542	0.342824	0.388007	-0.183835	22	42.3659	19.1802	0	C998
1000	-1.51266	-0.589335	0.321311	0.720983	-1.06869	-0.146941	0.917521	1.52207	0.749123	0.15402	-0.818444	0.791477	-0.0602629	8	55.4749	-17.97	0	C999
1001	-1.08997	0.755983	-0.0127797	1.02888	1.29157	0.318891	0.306922	-2.36118	-0.0491274	0.840003	1.15509	0.122127	-0.956027	1	-1.0239	81.5622	0	C1000
1002	-0.994497	0.373873	-0.194614	-0.874692	0.828874	0.83319	-0.0198717	-1.89431	-0.303052	1.41788	2.03964	0.372452	-0.448077	7	16.918	64.9277	0	C1001
1003	-0.872326	0.465525	-0.319613	0.64832	0.866037	0.12244	-0.00454134	-0.241754	-0.513728	0.627864	0.910083	-0.390947	-0.921334	1	-6.77976	67.1038	0	C1002
1004	-0.542084	-0.345727	0.8133	-0.808738	-1.28441	1.69458	-1.36226	-1.19243	-0.218465	1.63289	2.28323	0.684165	0.179804	30	-38.2161	34.4747	0	C1003
1005	0.249417	0.768663	-0.679909	-0.271041	1.23196	-0.822422	0.580492	0.724609	0.0938243	-0.640984	0.0237972	-0.33124	-0.491863	20	2.44246	29.4987	0	C1004
1006	-0.973878	0.580456	-0.243176	-0.621855	1.09449	0.59506	0.247346	-1.81461	-0.140801	1.15666	1.78782	0.104646	-0.71711	7	19.1523	70.2355	0	C1005
1007	-0.722418	-0.479686	0.788203	-0.0199304	-1.24238	1.49503	-1.17848	-1.6891	-0.40764	2.30219	1.71662	1.0437	0.21031	32	-37.5595	55.6316	0	C1006
1008	1.29813	0.185705	-0.770978	0.177068	0.63246	-0.338252	0.120613	0.567729	-0.260249	-0.921166	-0.0757276	-0.510605	0.271374	15	-4.94255	-28.1606	0	C1007
1009	1.72644	-0.299545	-0.638284	0.308719	0.199575	-0.282257	0.11352	0.183507	-0.161051	-1.09658	0.101113	-0.361572	0.649808	28	-33.3897	-48.5302	0	C1008
1010	-1.16907	-0.345272	2.27032	-0.200326	-0.177032	-0.308916	-0.072837	0.454886	1.44994	-0.0979485	-1.21744	0.430329	-0.0990597	23	23.5823	-70.383	0	C1009
1011	0.164254	1.00831	-0.771351	0.203609	1.4386	-0.552671	0.397521	0.265503	-0.22677	-0.25246	0.181375	-0.790388	-0.598444	4	-2.59176	42.1642	0	C1010
1012	1.24963	-0.13207	-0.532423	-0.127004	0.34353	-0.511475	0.200548	0.25913	0.103969	-0.795506	-0.0129442	-0.157973	0.37111	15	-17.7455	-28.0236	0	C1011
1013	-0.55275	-0.00133145	0.493662	-0.67218	-0.99947	1.83489	-1.14103	0.342113	0.667029	1.66478	-1.28038	0.494072	0.250759	6	-58.705	19.6346	0	C1012
1014	-1.44012	0.234065	1.63779	1.90836	0.530405	-0.104091	-0.150183	-1.97872	-0.114043	0.497135	1.16778	-0.120706	-0.858634	1	-6.45431	80.558	0	C1013
1015	-0.880677	1.1507	-0.368555	0.0444817	1.61074	0.186325	0.722709	-2.41663	-0.0332862	0.755576	1.70483	-0.072725	-0.921053	7	22.2954	80.1339	0	C1014
1016	-0.159169	-0.047358	-0.244231	-0.826677	-0.942406	2.24915	-1.10738	-1.5773	-0.827591	2.41741	0.82734	1.09935	0.669334	36	-45.8983	45.7492	0	C1015
1017	1.10574	0.222602	-0.747334	-0.100672	0.726379	-0.56455	0.159405	0.0973483	0.0835442	-0.713838	0.416289	-0.348248	-0.0222611	31	-19.125	-3.48773	0	C1016
1018	-1.26574	0.221957	0.282399	-0.330198	0.600341	0.505426	-0.204088	-1.425	-0.656996	1.06242	2.73966	0.128019	-0.704632	1	8.48478	62.2847	0	C1017
1019	-0.264444	-0.37692	-0.302511	-0.0222502	-0.228223	0.615786	-0.746664	0.475832	-0.990599	1.26583	1.10335	0.209225	-0.269936	4	-14.3853	57.806	0	C1018
1020	0.793027	0.624211	-0.658773	-0.327727	1.23271	-0.571743	0.40743	0.312531	-0.136184	-0.674397	0.123559	-0.692455	-0.0307194	19	15.4068	6.95402	0	C1019
1021	-1.24151	-0.31365	2.82592	-0.118218	-0.251287	-0.752161	-0.382624	-0.0630963	1.35551	-0.519221	-0.340504	0.520018	0.410515	35	17.5141	-78.7527	0	C1020
1022	-1.28958	-0.563547	0.399117	0.509963	-0.82702	0.173724	0.250942	0.594074	0.403693	0.415162	-0.175978	0.754023	-0.121467	22	56.1285	14.8375	0	C1021
1023	-0.670049	-0.753862	0.465603	-0.363442	-1.30575	1.3956	-1.09392	-1.52289	-0.543596	2.19726	3.20154	0.964073	0.0935553	32	-41.6206	63.5102	0	C1022
1024	-0.809316	-0.27392	1.30395	-0.0675007	-0.27953	-0.260599	-0.414794	0.622962	1.63781	-0.0575222	-0.796943	-0.104212	0.138555	23	28.0025	-62.3942	0	C1023
1025	-1.48729	-0.681108	0.809714	0.86091	-0.876948	-0.250418	0.339064	1.50316	0.316811	-0.147373	0.232777	0.597945	-0.370278	22	41.2917	25.9191	0	C1024
1026	-1.07114	1.17533	1.00824	-0.77956	1.59924	0.0189593	0.555886	-2.50432	0.446537	0.420902	1.42603	0.00929685	-0.854969	7	22.815	81.7782	0	C1025
1027	-0.421123	0.0652686	0.42846	-0.50531	-1.0513	1.84745	-1.1169	-1.47932	0.835468	2.15123	-0.605816	0.926397	0.272806	6	-63.0956	24.3783	0	C1026
1028	-1.27693	-0.336033	2.76992	-0.198491	-0.364602	-0.634053	-0.10369	0.167579	1.35007	-0.460487	-0.664954	0.550286	0.313385	35	16.9986	-76.6891	0	C1027
1029	1.14292	0.596639	-0.730418	0.0479042	0.927166	-0.404758	0.445571	0.119664	0.0401935	-0.973968	-0.526267	-0.431096	0.171335	24	28.5582	-26.0154	0	C1028
1030	-0.79514	0.737739	1.06881	-0.403587	1.3287	-1.13013	0.663485	3.67844	0.529304	-0.712391	-1.51085	-0.439786	-1.19944	13	52.5726	-43.9009	0	C1029
1031	0.555337	0.0810362	-0.296492	-0.0368889	0.704336	-0.577901	0.374972	0.777815	-0.118991	-0.444056	-0.245705	-0.349697	-0.221442	21	-27.0687	17.159	0	C1030
1032	-0.946386	0.594605	-0.582409	0.00606299	1.03338	0.297746	0.232378	-0.885358	-0.360167	0.932698	0.912047	-0.044985	-0.713398	1	-2.74214	65.7374	0	C1031
1033	-1.03005	0.588154	0.104857	-0.793072	1.00918	0.328266	0.200306	-1.8731	-0.367837	0.921188	2.7367	0.00367516	-0.636331	10	23.0981	62.5095	0	C1032
1034	1.28389	0.323631	-0.711753	0.0843573	0.762583	-0.215761	0.217607	-0.168606	-0.231195	-0.832407	0.104358	-0.532509	0.251039	34	14.3651	-36.5723	0	C1033
1035	-0.657838	0.216341	-0.537411	-0.569237	0.7028	0.304499	-0.0713409	0.343779	-0.657469	0.73658	1.55825	-0.0887058	-0.830604	4	-8.92677	59.6782	0	C1034
1036	0.7266	0.036666	-0.563335	-0.339235	0.627353	-0.465058	0.444671	0.385161	0.258908	-0.665421	0.361542	-0.315874	-0.234646	21	-16.9535	5.85933	0	C1035
1037	-1.04678	-0.680013	0.148535	0.531709	-1.06361	0.441652	0.617291	-0.3977	0.873238	1.05014	-1.11246	0.997179	0.546344	25	78.2935	16.3336	0	C1036
1038	-0.546508	0.681229	-0.3254	-0.0224293	1.22403	0.0534063	0.26654	-1.27086	-0.339244	0.525852	1.40144	-0.237385	-0.897583	7	10.1515	77.1257	0	C1037
1039	1.02206	0.858037	-0.517527	0.02871	1.22728	-0.631586	0.358632	0.121327	-0.0698526	-0.842553	-0.66899	-0.497945	0.0425484	24	33.5701	-18.4879	0	C1038
1040	-1.32096	0.649193	0.800677	-0.677424	0.950107	0.179396	0.0265214	-1.77016	0.202721	0.586254	1.95921	0.0312162	-0.655382	10	12.7887	55.1845	0	C1039
1041	-0.851685	-0.135121	1.29966	-0.274074	-0.429962	0.0356426	-0.619918	0.992905	1.07185	0.725885	-0.90353	0.193796	-0.403338	23	33.146	-58.0392	0	C1040
1042	0.00867564	-0.84219	-0.173283	0.266514	-0.997294	-0.284194	0.331408	0.126683	0.17791	0.178937	0.807632	0.590754	0.162974	14	54.4202	36.5959	0	C1041
1043	0.541661	0.523011	-0.454629	0.131869	1.05751	-0.71193	0.487698	0.191894	-0.123228	-0.802034	-0.216347	-0.207201	-0.123096	33	20.111	-8.63124	0	C1042
1044	-0.729769	0.573346	-0.621737	-0.666264	0.980347	0.400162	0.156074	-0.893954	-0.479644	1.02513	1.63027	0.00374799	-0.735959	7	10.7433	69.9688	0	C1043
1045	-1.11147	-0.42641	2.53517	-0.132308	-0.408494	-0.100823	-0.223262	0.494216	0.971476	0.0129404	-0.617507	0.323526	-0.430448	23	21.5721	-67.6512	0	C1044
1046	1.75562	-0.284389	-0.328437	0.245494	0.0421283	-0.207895	-0.434437	0.605916	-0.380334	-0.897435	0.346226	-0.731052	0.736276	28	-38.7021	-57.9245	0	C1045
1047	-0.884215	0.900917	-0.247343	-0.228838	1.59564	0.37177	0.579088	-2.01159	-0.0548132	0.923589	1.07496	0.0608479	-0.966333	7	14.8583	80.1727	0	C1046
1048	0.859355	0.0672587	-0.490119	-0.371762	0.407863	-0.606499	0.132397	0.720152	-0.0271991	-0.738559	0.257991	-0.194551	0.241441	37	-29.2501	-5.22453	0	C1047
1049	1.09145	-0.0682259	-0.216499	-0.146855	0.290399	-0.393788	-0.0753975	0.218096	-0.187652	-0.561397	0.394114	-0.354181	0.183159	37	-28.3116	-11.8658	0	C1048
1050	-0.53134	-0.27371	0.791115	-0.776194	-1.44436	1.52759	-1.08806	-1.37192	-0.0645983	1.55487	2.35114	0.598815	0.231664	30	-38.284	33.7949	0	C1049
1051	1.1912	-0.115579	0.691328	-0.177674	0.1626	-0.444577	-0.201758	0.185567	-0.0974621	-0.891116	0.00354901	-0.326678	0.273222	31	-16.6778	-10.0073	0	C1050
1052	0.281099	1.23025	-0.814908	-0.578092	1.8946	-0.775493	0.95659	-0.436375	0.383823	-0.609022	-0.0246508	-0.408376	-0.405667	20	18.6524	36.7123	0	C1051
1053	-0.765861	0.921677	-0.672386	-0.643236	1.6123	0.592837	0.655471	-2.32331	0.00259424	1.20385	1.57834	0.170254	-0.601984	7	19.6472	76.6059	0	C1052
1054	1.27412	0.237424	-0.414354	0.318611	0.893373	-0.88608	0.240771	0.61538	0.0650528	-0.97029	-0.284248	-0.660362	0.0481088	34	16.2034	-29.5915	0	C1053
1055	0.762841	0.483738	-0.437563	0.0105188	0.927595	-0.524011	0.363993	0.0873528	0.163445	-0.806332	-0.339265	-0.291245	-0.132497	33	19.5345	-7.75656	0	C1054
1056	2.18155	-0.56687	-0.230073	0.405479	-0.263876	0.131846	-0.518443	0.622226	-0.730512	-0.725356	0.232213	-0.915572	1.02545	28	-39.3995	-63.3842	0	C1055
1057	-1.01531	-0.19185	0.0678984	-0.699985	0.478497	0.870687	-0.184529	-1.95102	-0.321835	1.56467	2.63976	0.46624	-0.38793	10	32.2175	66.4278	0	C1056
1058	-1.55167	-1.0418	2.15419	3.9566	-0.260149	-0.321772	-0.428742	-0.286154	-0.260323	0.185482	1.42521	-0.316764	-1.19023	30	-21.2327	45.617	0	C1057
1059	-1.38771	-0.475431	3.85287	-0.18504	-0.220412	-0.889749	0.0136405	-0.556161	1.58266	-0.876127	-0.163593	0.593987	0.193526	35	10.6186	-88.4542	0	C1058
1060	-0.359438	0.619992	-0.926832	0.0548983	1.11022	0.0113075	0.0547742	0.127596	-0.442633	0.478887	0.873699	-0.250701	-0.94655	4	-5.48614	55.5126	0	C1059
1061	-0.254407	0.146624	0.514013	-0.797468	-0.484691	2.10291	-0.692216	-1.87374	0.871786	1.8838	-1.1795	0.919551	0.340353	6	-66.468	22.6881	0	C1060
1062	1.158	0.234559	-0.613901	-0.0336404	0.915592	-0.516646	0.260694	0.466184	-0.516793	-0.573863	0.104537	-0.508695	-0.0236598	26	2.25936	-18.2429	0	C1061
1063	0.0525226	0.870777	-0.421604	-0.444955	1.43478	-0.589152	0.72747	0.385102	0.0607334	-0.698886	-0.222641	-0.174831	-0.573807	20	7.03832	31.8479	0	C1062
1064	-1.34913	-0.554601	-0.101825	0.143723	-0.994234	0.0819838	0.521441	1.57649	0.370858	0.388394	0.354115	0.50288	-0.269414	22	45.48	14.3588	0	C1063
1065	0.519864	-0.182742	-0.157724	0.0191194	0.23	-0.53925	0.237629	0.47298	-0.0454801	-0.480305	0.415543	-0.153299	-0.215939	21	-28.2436	7.35805	0	C1064
1066	1.58767	0.121015	-0.710008	0.263902	0.425963	-0.330088	0.12896	0.175815	-0.205949	-0.902786	0.0324085	-0.631167	0.430873	2	-20.7375	-48.0541	0	C1065
1067	1.01183	0.577986	-0.559084	-0.248927	1.17335	-0.529619	0.508723	0.0773792	0.12425	-0.840663	-0.664367	-0.325956	0.0977429	24	32.7808	-21.2237	0	C1066
1068	-1.28168	-0.168772	1.9909	-0.175171	-0.507738	-0.235211	-0.547549	1.28628	1.30626	0.263785	-0.928137	0.197625	-0.144579	23	32.1582	-61.8853	0	C1067
1069	-1.42909	-0.450367	2.83673	4.4721	0.113575	0.0683579	-0.121322	0.0520056	-0.164345	0.485643	-1.63408	-0.0637606	-1.4718	30	-18.7268	41.165	0	C1068
1070	-0.0440402	0.136579	0.188708	-0.601805	-1.07047	2.23726	-0.846855	-1.89902	-0.656171	2.35969	0.191886	1.09523	0.543115	36	-51.8166	44.4828	0	C1069
1071	-0.404303	0.163357	-0.0303453	-0.920415	-1.13088	1.91735	-1.3113	-0.615385	0.0837891	1.46345	1.28444	0.342266	0.220519	5	-47.7022	22.4134	0	C1070
1072	-0.985485	-0.459629	0.328753	0.447451	-1.07964	0.438821	0.357962	0.299631	0.433956	0.689312	-1.12986	0.887564	0.48185	38	80.7567	2.84255	0	C1071
1073	-0.907409	0.265609	-0.0748505	-0.138849	0.846094	0.592715	-0.0897546	-1.5737	-0.502645	1.20503	1.78194	0.128198	-0.736682	7	9.12892	65.2084	0	C1072
1074	0.726416	0.628747	-0.717481	-0.381684	1.11528	-0.668122	0.441714	0.162123	-0.0339385	-0.658693	0.219825	-0.30839	-0.15773	19	14.4333	10.6478	0	C1073
1075	0.747596	0.0598316	-0.422559	-0.219772	0.468564	-0.52631	0.083984	1.15503	-0.629778	-0.38221	0.695562	-0.420143	-0.271549	21	-29.4598	12.0997	0	C1074
1076	-0.815149	-0.717637	0.550562	-0.570606	-1.42411	1.46706	-1.37219	-0.482048	-0.643085	2.26297	2.63046	0.936544	0.0435884	32	-34.675	63.8649	0	C1075
1077	1.56045	0.128587	-0.568515	-0.00748475	0.599421	-0.253665	-0.0974367	0.762172	-0.465055	-0.741022	0.000135	-0.827508	0.351056	2	-18.3132	-46.8723	0	C1076
1078	-0.937646	-0.558811	0.755771	0.337981	-1.03401	0.208009	0.393877	1.5503	0.0254441	0.780456	-0.875552	0.509423	-0.324678	8	55.1131	-7.02922	0	C1077
1079	1.06248	0.318086	-0.690686	-0.27082	0.757698	-0.490341	0.464934	0.160346	0.17031	-0.657672	-0.507013	-0.155212	0.160682	26	10.2269	-12.2289	0	C1078
1080	-0.976968	0.173326	1.78699	0.859495	-0.838566	0.181782	-0.761491	-0.0254734	0.409998	0.995762	-0.924829	0.149469	-0.077482	3	-54.4963	2.49483	0	C1079
1081	-1.24214	-0.442342	2.70514	-0.285051	-0.356989	-0.562424	-0.0984687	-0.00433153	1.49075	-0.30787	-0.679574	0.515116	0.331898	35	15.9998	-75.8698	0	C1080
1082	-0.474431	0.506971	0.181102	-0.758106	-0.577961	2.02024	-0.575675	-1.89293	1.54883	2.08876	-1.53765	0.825678	0.536185	6	-71.0788	22.4857	0	C1081
1083	1.12732	-0.104167	-0.771505	-0.224639	0.46655	-0.356009	0.226904	0.839691	-0.147362	-0.580515	0.180382	-0.367036	0.0340058	37	-29.7087	-15.2311	0	C1082
1084	1.49049	-0.0168896	-0.897512	-0.151649	0.533343	-0.239086	0.0415881	0.400695	-0.554927	-0.64241	0.727239	-0.749163	0.553604	18	-32.0906	-26.0828	0	C1083
1085	0.557236	0.16916	-0.510553	0.00230215	0.656473	-0.674196	0.236903	1.01954	-0.117952	-0.716913	0.193201	-0.20717	-0.336827	21	-22.6303	16.4024	0	C1084
1086	-0.997817	-0.620379	0.146272	-0.669214	-1.31441	1.04447	-0.852742	1.0283	-0.844454	1.79724	2.52074	0.612672	-0.42574	32	-23.1719	71.4181	0	C1085
1087	-0.356875	0.136051	-0.287413	0.734442	0.485866	0.181339	-0.250782	0.152654	-0.844179	0.547	1.04676	-0.397744	-0.819743	4	-11.9649	53.2161	0	C1086
1088	1.4612	-0.248828	-0.116893	0.714874	0.103	-0.174123	0.127987	-0.489052	0.085875	-0.979581	-0.888108	0.242577	0.531037	27	-5.54293	-69.6143	0	C1087
1089	1.39672	-0.0498956	-0.618732	0.170686	0.424214	-0.439849	0.103755	0.460715	-0.0941182	-0.872757	-0.236021	-0.283009	0.365175	2	-7.96299	-44.5974	0	C1088
1090	1.61415	-0.203598	1.36241	0.602179	-0.912304	0.378684	-1.12966	-0.846676	-0.531294	0.834963	-1.00802	0.263099	0.598237	3	-52.803	-13.4739	0	C1089
1091	1.72595	-0.308104	-0.2696	0.0551227	0.199752	-0.294178	0.0941416	0.425835	-0.29473	-0.880554	-0.382537	-0.336422	0.623855	27	-14.23	-66.4971	0	C1090
1092	0.93502	0.489292	-0.533577	-0.112818	1.05553	-0.588524	0.284734	0.121004	-0.0235615	-0.761284	-0.0154907	-0.580444	0.0498138	33	15.9473	-7.48048	0	C1091
1093	1.24311	-0.221605	-0.42653	-0.159945	0.163553	-0.535927	0.192875	0.552801	-0.0138184	-0.878644	0.101	-0.115901	0.36915	18	-33.9184	-37.3753	0	C1092
1094	1.99872	-0.0760206	-0.688484	0.613088	0.315008	-0.00903273	-0.263404	0.395276	-0.502723	-0.988587	-0.412451	-0.752191	0.961903	28	-29.9717	-66.852	0	C1093
1095	-1.07293	-0.212493	1.30688	0.985425	-1.19738	0.776743	-0.980958	0.69989	-0.335771	1.32771	-0.628799	0.484875	-0.150383	29	-73.2654	-7.16099	0	C1094
1096	-0.627325	-0.0875598	0.727371	-1.03072	-1.38014	1.66426	-1.45899	-0.716562	0.347331	1.26031	2.4087	0.25554	0.108532	5	-40.5008	24.034	0	C1095
1097	-0.732444	1.55999	-0.599425	-0.475796	2.10527	0.315709	0.951812	-2.63014	0.427838	0.872443	1.30205	0.0594892	-0.952392	7	19.5662	83.1714	0	C1096
1098	0.431171	-0.0801675	1.77961	-0.531426	0.164927	-0.549337	-0.307006	0.227991	0.233658	-0.631429	0.0357764	-0.278972	-0.124199	31	-16.9633	-8.3918	0	C1097
1099	-1.4497	1.93794	2.6785	-1.14707	0.924504	0.619847	0.354354	-2.76715	3.9521	0.630635	-2.09543	0.771722	-0.476719	23	32.5547	-74.5913	0	C1098
1100	-1.17586	-0.386229	0.94584	1.00483	-0.941622	0.573305	-0.698788	0.538779	-0.298945	0.935195	0.406082	0.188627	-0.427627	29	-77.4594	-5.45276	0	C1099
1101	-0.640072	0.603386	0.231258	-0.630918	0.927118	0.0717414	0.103295	-1.59917	-0.0125892	0.670818	1.5201	-0.0684968	-0.545381	7	9.11662	72.6891	0	C1100
1102	1.37856	-0.0268539	-0.588589	0.0335734	0.443062	-0.353512	0.246366	0.771491	-0.0492804	-1.00307	-0.567112	-0.171617	0.273449	15	-3.48272	-39.1111	0	C1101
1103	0.51745	0.810535	-0.743677	-0.392499	1.30284	-0.804471	0.668746	0.298317	0.31261	-0.799773	-0.186052	-0.207089	-0.3042	19	21.3405	20.6791	0	C1102
1104	-0.934205	1.20515	-0.42161	-0.330277	1.66392	0.397501	0.560019	-2.06237	-0.223258	0.936544	1.23326	0.0593708	-0.903299	7	15.1706	80.2365	0	C1103
1105	1.6875	-0.399675	-0.541489	0.254515	0.254575	-0.33937	0.188217	-0.00184046	-0.0235039	-0.814786	-0.260343	-0.192348	0.548086	11	-5.33689	-52.0939	0	C1104
1106	1.59336	-0.197125	-0.418884	0.177321	0.115442	-0.256623	0.0245022	0.422066	-0.187259	-0.838302	-0.340154	-0.419503	0.655691	27	-14.2171	-66.5532	0	C1105
1107	-1.00514	-0.0391023	1.92388	-0.00513667	-0.394039	-0.162279	-0.583272	1.47217	0.486848	0.430333	-0.65768	0.111763	-0.685888	23	31.5457	-56.301	0	C1106
1108	-0.983078	-1.01424	1.03287	-0.695533	-1.19383	1.05513	-1.01682	0.357488	-0.737641	1.81416	1.92015	0.715549	0.146961	32	-24.5896	65.2239	0	C1107
1109	-0.227636	0.127331	-0.513132	-0.345333	0.508762	0.303721	-0.299328	-0.0150341	-0.742043	0.90193	1.1476	-0.0224622	-0.527566	4	-10.6592	58.2148	0	C1108
1110	-0.152064	0.507369	-0.192867	-0.60939	0.957593	-0.537294	0.654648	1.12669	-0.00271164	-0.509385	-0.245047	-0.208097	-0.442625	9	-15.4783	26.2714	0	C1109
1111	1.06559	0.235006	-0.567507	0.215908	0.767046	-0.43406	0.136639	0.856981	-0.255354	-0.790023	-0.237008	-0.746285	0.11068	26	2.32289	-22.2509	0	C1110
1112	-0.0138794	0.671802	-0.216628	-0.388338	1.32057	-0.891624	0.603394	0.619286	0.129868	-0.616599	-0.267946	-0.0596958	-0.48575	20	7.20361	29.946	0	C1111
1113	1.14764	0.269034	-0.319808	-0.199129	0.745723	-0.600459	0.353036	0.61306	-0.071459	-0.835173	-0.590735	-0.304213	0.128968	34	5.72988	-25.9538	0	C1112
1114	0.646665	0.654827	-0.507218	-0.290035	1.07525	-0.621719	0.513162	0.234125	0.10639	-0.63658	-0.382731	-0.275336	-0.206552	19	11.2275	15.9786	0	C1113
1115	-0.733094	-0.666713	0.947278	-0.511186	-1.39498	1.40356	-1.15759	-1.30218	-0.30936	2.18287	1.96946	0.981096	0.356827	32	-36.1732	57.2385	0	C1114
1116	0.572346	0.184993	-0.343136	-0.494929	0.708573	-0.55249	0.168921	0.781855	-0.143331	-0.478579	0.279255	-0.351637	-0.101409	21	-24.0733	11.3324	0	C1115
1117	1.41723	-0.0852944	0.065568	0.0652839	0.432191	-0.308976	0.00362094	0.55936	-0.380241	-0.978974	-0.255051	-0.611176	0.400578	2	-17.2282	-48.7099	0	C1116
1118	0.640532	1.11355	-0.667526	-0.137129	1.63502	-0.584888	0.787294	-0.298994	0.34589	-0.732257	-0.91221	-0.430775	-0.175434	19	27.3233	18.0182	0	C1117
1119	1.67644	-0.157298	-0.672412	0.148068	0.299084	-0.282648	0.107219	0.541987	-0.310432	-0.754838	-0.306399	-0.420524	0.507155	27	-12.3749	-63.837	0	C1118
1120	1.18816	0.022639	-0.405412	-0.188859	0.560157	-0.345663	0.231743	0.424403	0.132515	-0.634443	-0.641392	-0.359827	0.278071	34	4.95258	-30.6482	0	C1119
1121	1.1082	0.0974171	-0.725776	0.00745053	0.554659	-0.374989	0.275704	0.554729	-0.275433	-0.668471	0.0381285	-0.514444	0.218773	26	-2.24366	-18.2731	0	C1120
1122	1.06246	0.293021	-0.709776	0.110409	0.741939	-0.378462	0.367325	0.0816293	-0.0680884	-0.847261	-0.250617	-0.259981	0.156763	34	15.1832	-33.2349	0	C1121
1123	0.992324	0.0104134	-0.616635	-0.262602	0.548219	-0.470917	0.318101	0.30416	0.0634161	-0.633401	0.154491	-0.345699	0.193484	31	-17.6515	-5.03223	0	C1122
1124	-1.28951	-0.0295656	2.02331	-0.54967	-0.198363	-0.495323	-0.213449	1.39679	1.83558	0.165101	-1.32256	0.225116	-0.409938	23	33.1715	-64.4877	0	C1123
1125	1.06366	0.114646	-0.608869	-0.17361	0.494004	-0.393017	0.214593	0.652606	-0.161509	-0.728553	0.145067	-0.440636	0.0992314	37	-26.9263	-15.6371	0	C1124
1126	1.77462	-0.273676	-0.54679	0.229364	0.330766	-0.23825	0.0758491	0.641165	-0.444213	-0.885507	-0.421421	-0.46224	0.687048	27	-15.1582	-63.3638	0	C1125
1127	0.749697	0.401713	-0.732134	-0.190295	0.735399	-0.68709	0.473127	0.369246	0.134109	-0.796589	-0.0796152	-0.104782	0.0325289	26	10.7939	-3.70969	0	C1126
1128	1.882	-0.12265	-0.782009	0.212292	0.436943	-0.127683	0.115514	0.0283968	-0.0465586	-0.915044	-0.321371	-0.677277	0.828008	27	-16.432	-71.3136	0	C1127
1129	1.91069	-0.555265	-0.591574	0.43881	-0.491317	-0.206406	-0.206811	0.829948	-0.426496	-0.925505	0.311701	-0.317098	0.823671	28	-43.3698	-59.9267	0	C1128
1130	-0.104611	0.41121	0.0131567	-0.796801	-1.2551	2.37252	-1.37144	-2.09271	-0.587564	2.03954	2.42693	0.709878	0.497828	30	-35.7741	45.0778	0	C1129
1131	1.24228	0.084838	-0.573336	-0.257987	0.603256	-0.403652	0.32486	0.379999	-0.0456807	-0.746655	-0.506208	-0.197041	0.412797	34	5.71246	-31.3038	0	C1130
1132	-0.432548	0.207842	-0.417493	-0.64046	0.633294	0.340286	-0.216444	0.270032	-0.744868	0.822044	1.54038	-0.196735	-0.748244	4	-9.31426	59.6844	0	C1131
1133	-1.13335	-0.116716	1.37342	-0.236505	-0.360675	-0.207913	-0.0635323	0.92002	1.49399	0.22395	-1.16889	0.241608	-0.148983	23	32.9491	-61.0182	0	C1132
1134	0.756448	0.424795	-0.619445	-0.118805	1.0772	-0.553756	0.399311	-0.103437	0.167235	-0.762631	0.132595	-0.392312	-0.101511	33	13.3565	3.08396	0	C1133
1135	0.775767	0.394415	-0.734363	-0.320147	0.988867	-0.583273	0.526687	0.449515	0.127983	-0.690837	-0.144988	-0.273175	-0.17584	12	6.49325	7.36746	0	C1134
1136	1.0243	0.243612	-0.727956	-0.00227757	0.685482	-0.586345	0.4097	0.616522	0.0228548	-0.885637	-0.502827	-0.191141	0.251129	34	8.39202	-29.5944	0	C1135
1137	-1.39498	-0.0793312	1.51366	2.6154	-0.612732	0.467273	-0.888634	-1.21467	-0.339985	1.06968	0.470074	0.166304	-0.576732	29	-91.2854	-1.25384	0	C1136
1138	-0.958135	0.67605	-0.204369	-0.376479	1.19101	0.449322	0.280186	-1.46346	-0.443299	0.918543	1.52089	-0.00855914	-0.857302	7	11.6778	74.8707	0	C1137
1139	0.906648	0.0350871	-0.628962	-0.322333	0.566964	-0.50858	0.377018	0.381261	0.0877364	-0.674116	0.446037	-0.31039	-0.0841083	31	-19.0521	-0.899469	0	C1138
1140	-1.15878	0.0335099	0.39719	1.04901	0.536227	0.367921	-0.162608	-1.56073	-0.714653	1.03302	1.85978	0.0463864	-0.795375	1	-6.12399	76.594	0	C1139
1141	1.47423	-0.251123	-0.570617	0.513039	0.228428	-0.245407	0.00564045	0.432068	-0.183105	-0.833115	-0.348757	-0.428284	0.570609	27	-16.5073	-60.1079	0	C1140
1142	-0.416952	0.187874	0.0256753	-0.79812	-1.24941	1.86251	-1.1507	-1.16352	0.0936325	1.18895	2.27296	0.0808818	0.34602	5	-42.8404	25.3401	0	C1141
1143	-0.920798	0.60602	-0.390638	-0.510236	1.28337	0.612428	0.325902	-1.48463	0.102486	1.07143	0.548357	0.12155	-0.618963	7	16.0923	78.044	0	C1142
1144	1.20336	-0.245705	-0.409109	0.293453	-0.0686638	-0.419486	0.27696	-0.024735	0.288895	-0.906657	-0.313193	0.374408	0.194865	34	4.21979	-32.9177	0	C1143
1145	0.700116	0.0224122	-0.550929	0.313671	0.662504	-0.682821	0.188219	0.438914	-0.115395	-0.593843	0.418529	-0.366735	-0.179498	21	-30.0693	-0.675239	0	C1144
1146	-1.53551	-0.488628	1.66284	0.215415	-1.0951	-0.205468	0.13058	1.95053	0.209023	0.226165	0.683861	0.2894	-0.877722	22	38.0247	17.123	0	C1145
1147	1.61502	-0.00245026	-0.981283	0.0992773	0.554463	-0.248	0.280338	-0.189437	0.10596	-0.973007	-0.257738	-0.210665	0.685573	11	-1.43739	-51.0198	0	C1146
1148	-0.883939	-0.0567904	1.63193	-0.0721847	-0.424798	-0.212183	-0.327288	0.664979	1.73828	0.106932	-1.05799	0.000163	-0.318188	23	29.1622	-64.6729	0	C1147
1149	0.638075	0.365913	-0.657822	-0.37552	0.857744	-0.54091	0.315156	0.318451	0.0441204	-0.613241	0.333499	-0.179053	-0.230648	21	-14.1353	12.5502	0	C1148
1150	0.698101	0.0122025	-0.641665	0.261122	0.517092	-0.376274	0.0551355	0.6498	-0.13064	-0.450235	0.205688	-0.428557	-0.165559	21	-30.7873	-0.672851	0	C1149
1151	1.7267	-0.181978	-0.707453	0.21336	0.148287	-0.346579	0.0125389	0.452323	-0.348599	-0.891331	-0.00913899	-0.288686	0.632488	28	-31.6668	-47.8347	0	C1150
1152	1.22723	0.162959	-0.606245	0.642814	0.624233	-0.426242	0.224335	0.156538	-0.192671	-1.02663	-0.326803	-0.386687	0.301604	11	10.5905	-53.718	0	C1151
1153	0.938334	0.137046	-0.369173	-0.0796873	0.554393	-0.555106	0.0553225	0.419618	-0.248434	-0.402724	0.426158	-0.633982	-0.00502195	37	-25.8648	-9.10785	0	C1152
1154	-1.21897	-0.34332	0.636312	0.235413	-0.934681	0.0245905	0.319765	0.858159	0.643679	0.786115	-0.882535	0.660352	-0.0765235	38	64.2657	0.530175	0	C1153
1155	1.73759	0.272233	-0.434728	0.237739	0.62454	-0.276489	-0.0130934	0.762794	-0.436317	-0.980266	-0.54703	-0.96381	0.576126	27	-9.45106	-58.3717	0	C1154
1156	0.739669	0.576411	-0.518666	-0.352668	1.06417	-0.589298	0.412222	0.379401	0.0644808	-0.804163	-0.000583	-0.40896	-0.222124	12	3.91252	10.1953	0	C1155
1157	0.26118	1.1318	-0.533748	-0.278545	1.59411	-0.777946	0.655014	0.281137	0.192921	-0.662043	-0.2058	-0.672422	-0.464853	20	17.6724	32.7353	0	C1156
1158	1.28816	0.306894	-0.693308	0.17686	0.750217	-0.409594	0.0847177	0.0480542	-0.160208	-0.85686	-0.132544	-0.344186	0.255681	34	13.3766	-35.9875	0	C1157
1159	0.838484	-0.903511	0.289577	-1.07645	-1.31351	2.26226	-0.704036	-0.256143	0.311195	0.109165	-2.16459	1.22934	3.88672	16	89.5606	-14.0142	0	C1158
1160	1.32578	0.221879	-0.322196	0.365196	0.803506	-0.499968	0.328544	0.482589	-0.281521	-0.952947	-0.8697	-0.455459	0.28951	11	13.6273	-49.8761	0	C1159
1161	-1.08737	-0.0563573	1.51937	-0.391068	0.0656451	-0.336122	-0.255581	0.880214	1.29762	0.0529349	-0.438671	0.00837644	-0.625391	23	26.8408	-60.2936	0	C1160
1162	-0.0178825	1.16135	-0.573736	-0.362866	1.61619	-0.78071	0.81031	0.433341	0.160495	-0.605201	-0.0958853	-0.557771	-0.649067	20	12.8405	35.0683	0	C1161
1163	-0.838555	-0.828207	0.192987	-0.626025	-1.25246	1.19533	-1.21131	0.178724	-0.528505	1.8999	2.60902	0.562089	0.057905	32	-29.4002	67.0843	0	C1162
1164	-0.189607	0.23941	1.64727	0.494339	-0.734027	0.468732	-0.978808	-0.678095	-0.085612	0.890585	-0.691043	0.420831	-0.0601576	3	-56.1911	-8.16576	0	C1163
1165	-1.05922	0.60446	-0.0691007	0.589458	0.973823	0.440433	0.172262	-1.89898	-0.30443	0.945583	1.29802	0.0762836	-0.838611	1	1.38575	78.176	0	C1164
1166	0.0382079	0.0189307	-0.531292	-0.463323	-0.948175	2.36233	-0.973736	-1.72125	-0.579466	2.59167	-0.0450972	1.27908	0.744243	36	-55.0106	44.973	0	C1165
1167	1.01421	0.838986	-0.574324	0.181215	1.32964	-0.526707	0.522359	-0.0239882	0.0818337	-1.01089	-0.82356	-0.633892	0.133914	24	33.6378	-19.0385	0	C1166
1168	0.729895	0.194153	-0.386963	-0.0547226	0.851255	-0.751544	0.353806	0.541048	0.12104	-0.799706	0.0018127	-0.382717	-0.122457	12	-4.83765	6.9511	0	C1167
1169	2.10789	-0.0199306	-1.31938	0.618733	0.587278	-0.067166	-0.0720842	0.663014	-0.634657	-0.980425	-0.23978	-0.648434	0.961427	27	-20.4124	-72.6218	0	C1168
1170	-1.00327	-0.340543	3.28623	-0.284075	-0.386114	-0.783111	-0.214979	0.00551133	1.33988	-0.707498	-0.548885	0.585048	0.247854	35	13.8825	-83.1992	0	C1169
1171	1.47361	0.203366	-0.528418	0.252221	0.73717	-0.388602	0.0505608	0.671896	-0.3694	-1.01231	-0.174248	-0.792476	0.320973	11	-2.23473	-44.7649	0	C1170
1172	1.33439	0.0815862	-0.304274	-0.273593	0.428852	-0.490194	0.301197	0.536865	-0.262931	-0.707885	-0.238856	-0.4514	0.340896	15	-5.41061	-34.2799	0	C1171
1173	1.80865	-0.36303	-0.675058	0.117814	0.198094	-0.234685	-0.191615	0.9348	-0.491598	-0.794349	0.24246	-0.696685	0.665233	28	-33.4057	-55.6905	0	C1172
1174	1.06587	0.36387	-0.788807	-0.216767	1.14062	-0.520741	0.497889	0.404436	0.0669655	-0.835457	-0.732953	-0.138085	0.172318	24	30.8979	-13.4958	0	C1173
1175	1.63556	-0.292637	-0.673831	0.429178	0.147121	-0.174574	-0.11321	0.0537329	-0.246424	-0.882781	0.154639	-0.343943	0.677348	28	-34.6748	-50.4552	0	C1174
1176	1.297	0.311593	-0.54696	0.287963	0.671372	-0.320631	0.155676	0.325904	-0.112219	-1.04856	-0.565672	-0.412774	0.325231	11	12.6915	-49.7145	0	C1175
1177	-0.687229	0.297833	-0.262784	0.267573	0.698403	0.153967	-0.146616	0.17444	-0.755562	0.625906	1.21271	-0.274141	-0.953353	4	-8.65008	56.0042	0	C1176
1178	0.828641	0.7497	-0.658868	-0.266143	1.31486	-0.680242	0.623393	0.423928	0.078998	-0.778059	-0.523151	-0.48856	-0.148225	33	28.7279	1.33726	0	C1177
1179	-1.07961	-0.354841	1.20087	0.745328	-0.800264	0.236575	0.222566	0.0836751	0.155189	0.821387	-1.01914	0.572164	-0.06134	38	72.8165	0.62082	0	C1178
1180	0.381228	0.382347	-0.371036	-0.285813	0.712427	-0.579045	0.469199	0.021746	0.111196	-0.723927	0.370129	-0.172851	-0.105304	9	-2.77792	20.7776	0	C1179
1181	1.2004	-0.28818	-0.315897	-0.0136776	0.163454	-0.450566	0.271754	0.27967	-0.0781996	-0.905431	0.155744	-0.00979071	0.228339	18	-35.9557	-36.9029	0	C1180
1182	1.0906	0.451833	-0.677517	0.039813	0.88749	-0.463378	0.34602	-0.142496	0.0924209	-0.891652	-0.275371	-0.266296	0.14119	24	25.1956	-23.8848	0	C1181
1183	0.00816198	0.374673	0.60348	-0.546784	-0.950264	2.40208	-1.13548	-1.71086	-0.270395	2.40151	-1.22083	1.12133	0.799315	36	-61.3234	40.6368	0	C1182
1184	0.978402	-0.415981	-0.310387	0.324978	0.250354	-0.438768	-0.09521	0.948411	-0.142778	-0.705671	0.278339	-0.577159	0.182809	37	-39.1648	-19.0803	0	C1183
1185	1.02933	0.470006	-0.855585	0.256796	0.833772	-0.567273	0.348784	0.331333	-0.163034	-0.789833	-0.041786	-0.496187	0.0365598	24	15.2951	-22.4046	0	C1184
1186	1.52851	0.281927	-0.739581	-0.0629989	0.915448	-0.29263	0.395688	0.492577	0.0065927	-1.06858	-0.835019	-0.418483	0.344903	34	18.1525	-42.0179	0	C1185
1187	0.438812	0.625901	-0.855498	-0.0810945	1.13928	-0.752571	0.592088	0.433258	0.41802	-0.793926	-0.431505	-0.205513	-0.0895973	19	13.8494	16.7531	0	C1186
1188	0.73012	0.536189	-0.547661	-0.381438	1.06131	-0.557009	0.316273	0.431607	-0.0581561	-0.705676	-0.182296	-0.385762	0.0572722	12	5.62303	5.78288	0	C1187
1189	0.849462	0.444984	-0.33327	-0.354131	0.868801	-0.563744	0.385102	0.112698	0.136018	-0.757351	-0.0754079	-0.381397	-0.0630337	33	14.5594	-4.61641	0	C1188
1190	0.102175	0.628326	-0.565085	-0.391923	1.2553	-0.620103	0.633825	0.495838	0.2493	-0.533855	-0.0316265	-0.210279	-0.642513	20	7.25021	30.9147	0	C1189
1191	0.791554	0.469969	-0.842172	0.177325	0.834009	-0.558071	0.27105	0.268172	0.0182244	-0.848282	0.0818713	-0.364958	0.00346007	24	17.3433	-14.9175	0	C1190
1192	1.56681	0.282695	-0.787012	0.124249	0.726369	-0.385646	0.229786	-0.14313	-0.0989	-0.967887	-0.184412	-0.412984	0.469523	11	3.90161	-51.5177	0	C1191
1193	0.390953	-0.860718	0.726997	-0.444358	-1.32859	1.7737	-0.843868	-1.06474	-0.34338	0.806086	-1.29881	0.862952	3.18801	16	86.7767	-13.0655	0	C1192
1194	-0.363488	-0.0321875	0.832087	-0.591986	-0.980893	2.08257	-0.942507	-1.88893	-0.271932	2.14408	0.163694	0.822489	0.495009	36	-49.5411	42.2806	0	C1193
1195	0.850901	0.524787	-0.535031	0.0562989	0.975395	-0.43012	0.54513	0.0897611	0.155714	-0.840668	-0.92806	-0.182676	0.103984	24	33.187	-23.2963	0	C1194
1196	1.37037	0.327587	-0.504943	-0.108029	0.847853	-0.245211	0.241652	-0.176173	-0.121687	-0.810655	-0.484741	-0.494416	0.503621	34	19.5082	-38.4643	0	C1195
1197	-0.942561	0.720862	-0.301126	-0.0710228	1.30658	0.477436	0.317636	-1.85767	-0.16513	1.08138	0.972377	0.0442348	-0.719384	1	7.63024	79.9889	0	C1196
1198	1.07505	0.0297932	-0.253557	0.134792	0.534419	-0.515588	0.217696	0.745384	-0.0833313	-0.814273	-0.506169	-0.410971	0.134834	34	3.10496	-27.7971	0	C1197
1199	1.15076	0.280617	-0.606519	0.192145	0.716415	-0.475961	0.199827	0.675611	-0.318752	-0.930101	-0.152543	-0.599181	0.246388	15	-2.7348	-24.1243	0	C1198
1200	1.26426	0.0985315	-0.976869	-0.0267699	0.701776	-0.412381	0.329521	0.488548	-0.152683	-0.898399	-0.0030168	-0.345585	0.36201	34	3.87984	-39.2821	0	C1199
1201	-0.751177	-0.104553	1.37156	0.475722	0.216308	-0.56948	-0.110605	0.564813	1.19519	-0.317465	-0.767964	-0.0261449	-0.509212	23	23.4642	-56.7328	0	C1200
1202	1.52583	-0.194279	-0.624897	0.117754	0.230172	-0.238495	0.245773	0.329691	-0.00219267	-0.844139	-0.53953	-0.0902462	0.410962	27	-9.66111	-67.0773	0	C1201
1203	0.441077	0.293458	-0.319507	-0.285323	0.783596	-0.420599	0.401761	0.471473	-0.279186	-0.421299	0.274515	-0.263683	-0.481242	9	-14.4636	18.5543	0	C1202
1204	-1.46912	-0.778427	-0.0224805	1.2053	-0.861111	-0.138276	0.442142	0.88786	0.45384	0.306582	0.546046	0.718583	-0.528587	22	45.9617	26.4865	0	C1203
1205	0.891973	0.259332	-0.465063	-0.241197	0.756167	-0.467119	0.335415	0.419638	-0.0980041	-0.559272	-0.389271	-0.331921	0.139537	26	12.2235	-12.04	0	C1204
1206	1.4348	-0.0640105	-0.679958	-0.239779	0.287371	-0.485535	0.208276	0.554271	-0.219781	-0.763637	0.165321	-0.283579	0.419632	18	-28.4845	-31.5855	0	C1205
1207	1.75131	-0.131579	0.851552	0.649379	-0.239251	0.228414	-0.84255	-0.558535	-0.317531	0.132219	-1.07403	-0.29665	0.618518	3	-52.311	-12.307	0	C1206
1208	-1.09309	-0.63408	0.539353	0.71743	-0.918338	0.471383	0.649607	0.0182688	0.349581	0.641289	-0.877617	0.66155	0.12682	38	73.9355	4.35445	0	C1207
1209	1.56021	-0.0457255	-0.491412	0.129216	0.604672	-0.408742	0.301407	0.404158	-0.132734	-1.09148	-0.494042	-0.373536	0.465904	27	-5.46496	-63.2429	0	C1208
1210	0.152237	0.525995	-0.392027	0.504062	1.08854	-0.588688	0.291878	0.745982	-0.376089	-0.289905	0.270133	-0.859919	-0.682068	4	-6.96812	40.802	0	C1209
1211	1.22827	-0.812529	-0.45182	0.398172	-1.14025	-0.180637	-0.0370432	1.6361	-0.208731	-0.388139	-0.0188512	0.0747676	0.516732	30	-25.1363	32.0511	0	C1210
1212	1.07224	0.0298018	-0.304916	-0.203685	0.499812	-0.563535	0.0376037	0.536022	-0.168109	-0.805571	0.355571	-0.308929	0.0930244	37	-27.1955	-9.76586	0	C1211
1213	0.966689	-0.0733609	-0.117968	-0.347563	0.456951	-0.541098	0.189781	1.12059	-0.270627	-0.71814	-0.288988	-0.174238	0.0773985	21	-35.3666	5.71682	0	C1212
1214	-1.13189	-0.416464	2.96623	-0.168492	-0.483433	-0.630503	-0.0331104	0.0374138	1.52597	-0.593413	-0.6154	0.546512	0.186622	35	15.9732	-79.3955	0	C1213
1215	0.698794	0.280571	-0.448908	-0.25296	0.727005	-0.554952	0.207042	0.471954	-0.12914	-0.688858	0.300705	-0.455466	0.0770816	21	-21.7131	4.89874	0	C1214
1216	0.933427	0.623429	-0.762805	-0.103006	1.19189	-0.542208	0.484907	0.0499067	0.112991	-0.635039	-0.354667	-0.43218	-0.181388	33	21.4289	1.64932	0	C1215
1217	0.47959	0.363578	-0.606993	-0.287507	0.826541	-0.522599	0.26532	0.49487	-0.0314363	-0.566519	0.197602	-0.171808	-0.196094	9	-11.1889	12.836	0	C1216
1218	-1.12014	-0.111069	2.48856	-0.281476	-0.336791	-0.665088	-0.166492	0.444449	1.41402	-0.530583	-0.483845	0.329333	-0.00257926	35	19.234	-72.0875	0	C1217
1219	1.30509	0.082161	-0.46789	-0.262259	0.641279	-0.212862	0.00176856	-0.0341435	-0.568971	-0.421959	0.277535	-0.44783	0.377184	18	-24.1515	-25.6903	0	C1218
1220	0.853013	0.244169	-0.306896	-0.0866942	0.796311	-0.661324	0.103101	0.818848	-0.305675	-0.42738	0.132359	-0.630803	-0.240906	21	-31.7432	3.37863	0	C1219
1221	1.43253	0.107051	-0.437855	0.580625	0.646058	-0.383805	0.183171	0.155554	-0.116046	-1.02396	-0.559262	-0.533943	0.353288	11	11.1879	-53.007	0	C1220
1222	0.416063	0.574455	-0.415995	-0.419846	1.20592	-0.6301	0.497176	0.72195	-0.203308	-0.677193	0.21846	-0.704949	-0.210032	20	0.44383	25.7011	0	C1221
1223	0.035612	0.358347	0.417704	-0.492726	-0.836236	2.43073	-1.18124	-1.99356	0.597167	2.2467	-1.22638	0.945731	0.712305	6	-67.02	27.4263	0	C1222
1224	-1.38064	-0.15486	3.094	-0.246116	-0.388201	-0.686628	-0.51437	0.487806	1.59705	-0.587542	-0.404655	0.318162	0.105706	35	18.9742	-78.5719	0	C1223
1225	1.00543	0.150023	-0.837565	-0.198645	0.684397	-0.430926	0.272319	0.417984	-0.13079	-0.732507	0.236002	-0.159242	0.0254915	31	-17.0176	-1.19128	0	C1224
1226	-1.35168	-0.260967	0.610286	7.28e-05	-0.887325	-0.319376	0.940204	2.16377	0.872337	0.252896	-1.54911	0.994679	-0.205784	13	50.591	-20.0894	0	C1225
1227	-0.976292	0.627456	0.0540647	-0.839596	1.08078	0.592658	0.235551	-2.52595	-0.258815	1.20328	3.24268	0.260998	-0.646996	10	30.933	59.6893	0	C1226
1228	0.465149	0.37053	-0.113776	-0.231523	0.748852	-0.656328	0.406961	0.253999	0.0465898	-0.661592	0.124886	-0.263846	-0.294836	9	-10.352	10.6602	0	C1227
1229	1.55174	-0.125513	-0.547686	0.616744	0.282748	-0.246845	-0.148241	0.539688	-0.522285	-1.03109	0.416566	-0.839388	0.526889	28	-35.3587	-55.4427	0	C1228
1230	-1.19593	-0.427835	0.453549	0.0185148	-0.736701	0.409033	0.451584	0.60336	0.535351	0.986296	-1.28793	0.73949	0.262143	38	69.1035	6.99219	0	C1229
1231	1.31524	0.157193	-0.572877	0.300496	0.740331	-0.42847	0.191339	0.669499	-0.283865	-1.16718	-0.363382	-0.477415	0.373624	11	10.5407	-50.4314	0	C1230
1232	-1.10526	-0.291614	2.6269	-0.351731	-0.292868	-0.513342	-0.147258	0.633439	1.42743	-0.00885885	-0.88568	0.234226	-0.323496	35	22.5514	-71.9801	0	C1231
1233	-0.55509	0.0331723	1.41765	-0.342604	-0.0939154	-0.122564	-0.336538	0.511987	1.47437	0.167745	-1.15496	-0.154952	-0.193033	23	28.7394	-62.0418	0	C1232
1234	-1.212	-0.422243	0.783017	0.854237	-0.949681	0.275933	0.359383	0.655876	0.196138	0.789679	-0.861368	0.666551	-0.35913	38	67.4908	-2.48316	0	C1233
1235	1.47566	0.582299	-0.708147	0.137924	0.979307	-0.384729	0.424523	0.38929	0.0331959	-1.04734	-1.28727	-0.410466	0.46374	34	16.7375	-49.5313	0	C1234
1236	1.87952	-0.0981147	-0.59005	0.376949	0.279361	-0.250673	-0.109059	0.477848	-0.372714	-0.797385	-0.3586	-0.722877	0.761206	27	-17.9913	-62.5584	0	C1235
1237	1.55941	-0.0287401	-0.491407	0.210801	0.336812	-0.26996	0.139274	0.487189	-0.211643	-1.17091	-0.553759	-0.312252	0.735424	27	-8.15543	-64.8392	0	C1236
1238	0.971843	0.379006	-0.973308	-0.121519	0.976293	-0.601011	0.374484	0.222764	0.00123716	-0.878285	0.0582682	-0.181902	0.203427	26	2.69026	-10.2349	0	C1237
1239	-0.957513	-0.457024	1.50007	0.31925	-0.972393	0.836887	-0.842007	-0.401897	0.233813	1.47353	-0.348337	0.583998	-0.213219	17	-75.4026	-13.6763	0	C1238
1240	1.78164	-0.0440746	-0.883478	0.328447	0.371049	-0.237415	0.15026	-0.0354556	-0.227667	-0.888479	-0.296666	-0.246806	0.699807	11	-3.48359	-53.3132	0	C1239
1241	-0.90506	0.873008	0.112974	-0.733476	1.22223	0.586282	0.404375	-2.38545	0.0673039	1.10021	1.85817	0.0637112	-0.718069	7	23.3859	74.3761	0	C1240
1242	-0.185518	0.79426	-0.417005	-0.401902	1.30751	-0.732956	0.664977	0.555064	0.327908	-0.556349	-0.102375	-0.244098	-0.600417	20	5.00127	36.3966	0	C1241
1243	1.54147	-0.208393	-0.644596	-0.11257	0.181416	-0.249674	0.182749	0.784988	-0.337598	-0.719827	-0.272688	-0.24831	0.451835	18	-30.3247	-43.0679	0	C1242
1244	1.88093	-0.418474	-0.26421	0.279098	0.158323	-0.112779	-0.173342	0.609115	-0.685302	-0.905705	0.126622	-0.774456	0.786922	28	-34.7912	-63.4017	0	C1243
1245	-0.990978	0.864992	-0.0541471	-0.808051	1.33692	0.473124	0.453114	-2.46097	-0.0840597	1.00049	2.56872	0.207662	-0.811286	10	27.244	55.5395	0	C1244
1246	0.909407	0.860761	-0.563	0.0793289	1.22695	-0.459367	0.440561	-0.241789	0.127191	-0.978889	-0.59375	-0.456671	0.0497457	24	30.8641	-20.2657	0	C1245
1247	-0.85483	0.116651	1.8642	0.664579	-0.560072	0.274287	-0.591341	0.892424	-0.501775	0.530368	-0.574366	0.0198166	-0.442197	3	-48.1535	12.0361	0	C1246
1248	-1.08816	0.55366	-0.602673	-0.530476	0.945665	0.591367	-0.142328	-1.07246	-0.46783	1.17898	1.73831	0.212214	-0.589523	7	11.3111	66.2938	0	C1247
1249	1.77557	0.326236	-0.849553	0.249082	0.72842	-0.146133	0.0614303	0.597884	-0.455199	-1.00406	-0.389693	-0.899753	0.613808	11	0.840865	-63.0716	0	C1248
1250	-0.56337	0.189674	-0.22865	-0.872474	-1.32319	1.8273	-1.36922	-0.769758	0.529256	1.45265	1.97772	0.243772	0.236042	5	-43.6901	23.4602	0	C1249
1251	1.07027	0.337847	-0.255841	-0.0138269	0.747842	-0.30281	0.0188195	0.0352393	-0.294575	-0.863241	0.268599	-0.583448	0.0909628	26	-0.113525	-18.6217	0	C1250
1252	-0.339984	0.267721	1.01653	-0.554022	-0.910979	2.0141	-0.704458	-2.00363	1.00785	1.93312	-1.44176	0.847184	0.843996	6	-70.3695	18.5793	0	C1251
1253	0.346186	0.490601	-0.406093	-0.533704	0.997943	-0.560029	0.549652	0.534121	-0.00583216	-0.533081	0.17349	-0.222079	-0.534352	9	-7.22956	22.0234	0	C1252
1254	1.32212	0.121886	-0.633223	-0.125245	0.717918	-0.464858	0.257066	0.920851	-0.287656	-0.629514	-0.481213	-0.626601	0.326914	15	-4.72328	-36.6667	0	C1253
1255	-1.32854	-0.516211	3.49503	-0.240453	-0.468778	-0.875952	-0.00461597	-0.069909	1.57569	-0.744078	-0.60864	0.821341	0.375869	35	12.1491	-84.7032	0	C1254
1256	-0.277324	0.613216	0.33655	-0.627953	-0.767065	2.16212	-0.570673	-2.15823	1.18317	1.88664	-1.37449	0.891053	0.56956	6	-70.6047	22.7697	0	C1255
1257	0.409073	0.312426	-0.432384	-0.194376	0.817391	-0.684557	0.469906	0.685899	0.255213	-0.617668	-0.465453	0.0384558	-0.326081	20	2.42979	20.6387	0	C1256
1258	-0.292311	0.404835	0.736567	-0.920984	-0.918994	2.18264	-0.850028	-1.26576	0.865182	1.85011	-1.54592	0.805173	0.547366	6	-62.9242	20.7339	0	C1257
1259	-1.09423	-0.720207	0.372871	0.30797	-0.902458	0.319277	0.238673	0.948575	0.282112	0.817365	-0.355977	0.613421	-0.234342	8	59.4695	-0.164026	0	C1258
1260	-1.14183	0.696422	-0.216416	0.597262	1.1592	0.503857	0.280003	-2.11942	-0.334928	1.00795	1.2035	0.0772744	-0.670814	1	0.65609	80.859	0	C1259
1261	1.44283	0.130698	-0.839353	-0.218854	0.633892	-0.404956	0.131198	0.28253	-0.325672	-0.573797	0.189366	-0.517323	0.45892	2	-21.153	-34.5381	0	C1260
1262	-0.232585	0.391355	0.235432	-0.853801	-0.98832	2.20641	-1.14256	-2.20942	0.763827	1.47275	1.60041	0.380751	0.26006	5	-46.5202	29.3609	0	C1261
1263	-0.436845	0.247468	0.145078	-0.966996	-0.950336	2.01319	-1.39971	-1.02267	0.710936	1.55725	0.590466	0.513902	0.156598	5	-51.8597	25.2186	0	C1262
1264	0.599619	-0.217657	-0.107844	0.483677	0.479949	-0.151263	-0.421779	0.464011	-0.790838	0.0309562	1.00392	-0.712593	-0.360513	4	-10.4847	46.739	0	C1263
1265	-1.29055	0.436978	0.977529	-0.724885	0.672165	0.30758	-0.155197	-1.50905	0.122117	0.590932	2.14467	-0.0179111	-0.695578	10	12.8497	55.2784	0	C1264
1266	0.263912	1.21559	-0.945002	-0.180311	1.73174	-0.702079	0.828677	0.23779	0.395665	-0.715432	-0.0795112	-0.653024	-0.702382	20	19.6224	31.0499	0	C1265
1267	-1.06239	0.142747	1.8914	0.78858	-0.968102	0.336659	-0.824832	0.242285	0.138136	0.946368	-0.710344	0.538054	-0.444763	3	-49.112	6.16191	0	C1266
1268	1.18268	0.389197	-0.588437	0.204309	0.885786	-0.472764	0.363073	0.308849	0.0512563	-1.0171	-0.736231	-0.470453	0.307796	34	20.5216	-40.8253	0	C1267
1269	1.35976	-0.250011	-0.626223	-0.0930493	0.403552	-0.4884	0.244755	0.781963	-0.212263	-0.465573	0.0403032	-0.56416	0.216987	37	-31.353	-16.2932	0	C1268
1270	0.374871	0.878694	-0.514148	-0.213501	1.25185	-0.45841	0.28404	0.455272	-0.309609	-0.372036	0.397784	-0.878068	-0.517996	4	-5.40446	43.2625	0	C1269
1271	-0.0980146	0.126905	-0.0712815	-0.627988	-1.04435	2.19065	-0.808682	-1.60683	-0.77996	2.47735	0.0243328	1.16368	0.521656	36	-53.221	43.8747	0	C1270
1272	1.43073	0.458633	-0.491799	0.622751	0.972546	-0.379069	0.217023	-0.00182247	-0.173834	-1.07975	-0.703184	-0.787832	0.434391	11	14.6182	-51.4931	0	C1271
1273	1.22651	0.602646	-0.627457	-0.256614	1.16664	-0.428528	0.254978	0.617951	0.0188391	-0.851719	-0.893574	-0.483917	0.170788	33	32.4753	-7.56361	0	C1272
1274	0.0262623	0.857971	-0.267343	-0.408812	1.26089	-0.63327	0.492639	0.303275	0.238358	-0.540979	0.451374	-0.585923	-0.800431	9	-4.41241	33.8327	0	C1273
1275	-1.19945	-0.0568277	1.70867	-0.26174	-0.336229	-0.0121697	-0.459746	0.654296	1.4825	0.442618	-1.04036	0.290963	-0.355996	23	30.9293	-63.2046	0	C1274
1276	1.05755	-0.297834	1.35093	0.553065	-0.92486	0.541431	-0.779521	-0.519829	-0.540465	0.804279	-0.977568	0.243096	0.290223	3	-53.8333	-11.8327	0	C1275
1277	1.08076	0.278753	-0.75165	-0.170584	0.811715	-0.528753	0.3466	0.237159	0.00614448	-0.821665	-0.106477	-0.144447	0.0880363	26	8.65366	-7.77859	0	C1276
1278	-1.07282	-0.289993	1.67462	0.177174	-1.10678	0.780884	-0.889036	1.05351	-0.091398	1.3118	-0.965059	0.520489	0.0771999	17	-79.4579	-25.6941	0	C1277
1279	-0.157738	0.700412	-0.736752	-0.430339	1.23233	-0.683426	0.630378	0.243244	0.292085	-0.551473	0.415343	-0.0345644	-0.510862	9	-6.29624	30.8655	0	C1278
1280	0.488171	0.722688	-0.788019	-0.501418	1.19448	-0.684101	0.446709	0.624165	0.0413282	-0.666227	0.0249674	-0.271182	-0.195518	19	10.6025	12.3789	0	C1279
1281	1.49247	0.0390144	-0.439702	0.104792	0.565428	-0.382457	-0.000515	0.677678	-0.533749	-0.854506	0.0911186	-0.784694	0.440293	2	-23.4919	-51.7791	0	C1280
1282	-0.882899	0.606747	-0.210441	-0.738128	1.0855	0.531012	0.239783	-2.16757	-0.237313	1.11559	2.62261	0.191541	-0.699838	10	24.1605	64.252	0	C1281
1283	1.13872	0.431972	-0.47119	-0.170892	0.845927	-0.631948	0.318333	-0.152841	-0.0189999	-0.880335	-0.102699	-0.196868	0.205217	24	25.717	-21.8947	0	C1282
1284	-1.18806	0.558022	0.446262	-0.440083	0.969462	0.464462	0.323153	-2.74962	0.127413	0.971564	2.93133	0.385609	-0.780385	10	29.9934	57.4179	0	C1283
1285	1.37981	0.0154734	-0.747004	-0.0084122	0.554454	-0.261274	0.0197693	0.114875	-0.256148	-0.796977	0.220937	-0.376919	0.462095	2	-20.53	-35.7301	0	C1284
1286	0.768372	0.763273	-0.559249	-0.303273	1.20089	-0.616505	0.447253	0.741266	0.129106	-0.692123	-0.871777	-0.495142	-0.027898	33	30.6817	-0.088717	0	C1285
1287	0.799177	0.339628	-0.651688	-0.339494	0.896209	-0.580625	0.417402	0.474331	0.166575	-0.739901	-0.238617	-0.250811	0.016093	12	5.30602	6.674	0	C1286
1288	-0.992329	0.905331	-0.215313	-0.6794	1.27892	0.232991	0.396036	-1.93327	0.0670244	0.813307	2.14615	-0.00285057	-0.802093	10	21.4483	57.9856	0	C1287
1289	-1.53905	-0.943148	1.17365	2.50805	-0.541545	-0.286626	0.12411	1.18412	0.0418062	0.136968	-0.0550814	0.100255	-0.606454	22	37.7837	34.2433	0	C1288
1290	-1.03849	0.616618	0.19021	0.0576466	1.15226	0.306786	0.257762	-1.87038	-0.209873	0.921881	1.82358	-0.118689	-1.00367	1	5.04238	74.7497	0	C1289
1291	2.2026	-0.793434	-0.495739	0.482622	-0.649218	0.191051	-0.336448	1.11596	-0.561719	-0.681531	-0.100257	-0.562554	0.943044	28	-41.4153	-63.172	0	C1290
1292	0.261023	0.894642	-0.865442	-0.239358	1.34898	-0.679172	0.744713	0.0525559	0.477616	-0.635917	-0.187696	-0.137857	-0.559387	19	19.327	26.2408	0	C1291
1293	1.34033	-0.121276	-0.668247	-0.0112967	0.40179	-0.34736	0.0705266	0.463481	-0.13533	-0.93145	0.266473	-0.356135	0.355596	18	-27.9206	-31.2453	0	C1292
1294	-0.927396	-0.933235	0.789458	-0.716575	-1.5769	1.18232	-1.1793	0.179972	-0.57413	1.89845	3.13658	0.806263	-0.157326	32	-31.9526	71.9817	0	C1293
1295	1.47675	-0.324197	-0.866878	-0.148624	0.166099	-0.357131	0.326418	0.323528	0.0133233	-0.878746	0.193256	-0.0762928	0.547785	18	-31.7477	-36.9872	0	C1294
1296	-0.742227	-0.0998185	1.87495	-0.150511	-0.493644	-0.0562374	-0.459074	1.09529	1.41653	0.216931	-1.00044	-0.15536	-0.57828	23	33.2746	-63.4726	0	C1295
1297	1.4128	-0.258572	-0.376699	-0.119481	0.305205	-0.382819	0.0446298	0.947811	-0.268107	-0.552241	0.0353907	-0.711524	0.278479	18	-38.1103	-22.2101	0	C1296
1298	0.853794	0.431548	-0.671099	-0.255138	0.930971	-0.531741	0.417023	0.574825	-0.225019	-0.709053	-0.00881685	-0.414723	-0.0647646	12	5.0618	5.43148	0	C1297
1299	1.26202	0.269461	-0.768154	-0.112884	0.847109	-0.380839	0.123255	0.258869	-0.173921	-0.515187	-0.214312	-0.522583	0.264777	34	10.3377	-27.6055	0	C1298
1300	-0.820135	-0.214948	1.77266	-0.0997069	-0.147961	-0.372225	-0.203901	0.65171	0.994528	0.112279	-0.65847	-0.0472697	-0.413565	23	25.1004	-60.7141	0	C1299
1301	1.605	-0.179982	-0.567427	0.043557	0.325729	-0.167904	0.107152	0.145278	-0.470788	-0.837651	0.0724905	-0.405993	0.679886	2	-21.7569	-41.4994	0	C1300
1302	-0.80572	-0.779899	0.622599	-0.607202	-1.63201	1.21533	-1.1013	-0.253003	-0.573302	2.04617	2.89581	0.852961	-0.0354647	32	-33.5895	67.0439	0	C1301
1303	-0.985675	-0.969955	0.451595	-0.848057	-1.52461	1.32472	-1.16456	0.641856	-0.898702	1.96166	3.40318	0.718534	-0.00198505	32	-28.2764	75.1796	0	C1302
1304	0.701383	0.0337889	-0.585652	-0.292634	0.515884	-0.623759	0.488803	0.789327	-0.0294236	-0.72589	0.0540051	-0.0562739	-0.0012439	31	-14.5728	3.36584	0	C1303
1305	-1.05421	-0.184752	2.46437	-0.0791374	-0.383613	-0.422212	-0.386353	0.410927	1.52933	-0.0252918	-0.980262	0.24318	-0.167414	35	22.3192	-71.3366	0	C1304
1306	-0.771223	-0.218716	0.650111	-0.766279	-1.49924	1.54027	-1.18002	-0.697571	-0.318655	1.6399	2.32052	0.698247	0.0431312	30	-38.627	36.5694	0	C1305
1307	1.43673	0.0537771	-0.622437	-0.0635991	0.465584	-0.32247	0.290482	0.491961	0.124948	-0.881475	-0.66813	-0.451572	0.538198	11	-2.34553	-39.4336	0	C1306
1308	-1.23589	-0.354909	3.40404	-0.278744	-0.161975	-0.73243	-0.131316	-0.533733	1.56702	-0.769574	-0.678704	0.74669	0.466617	35	8.39478	-84.7915	0	C1307
1309	1.5516	0.223551	-0.763988	-0.0200203	0.770926	-0.213082	0.168341	0.628637	-0.381263	-0.752175	-0.0943742	-0.90413	0.26947	11	3.61896	-43.9996	0	C1308
1310	0.428999	0.715768	-0.343953	-0.433927	1.16415	-0.691793	0.567537	0.135956	0.161487	-0.758662	0.0117501	-0.376566	-0.253373	19	13.8674	20.3904	0	C1309
1311	1.83624	0.0345692	-0.623424	0.123256	0.459972	-0.241963	0.107162	-0.307849	-0.261428	-0.947027	-0.320204	-0.270662	0.838222	11	-4.4195	-53.9054	0	C1310
1312	-0.198877	-0.238053	0.097882	-0.334	-0.994838	2.24061	-1.15094	-1.764	-0.567875	2.37278	0.69589	1.14984	0.655145	36	-49.3711	44.3483	0	C1311
1313	1.128	0.0320083	-0.751004	-0.300723	0.422466	-0.372938	0.129031	0.615444	-0.197399	-0.502073	0.213927	-0.240674	0.0987564	37	-22.0577	-12.0672	0	C1312
1314	1.72291	-0.0980857	-0.87478	-0.0149675	0.132437	-0.117968	-0.0361001	0.702708	-0.505423	-0.705992	0.196843	-0.55049	0.614162	28	-31.8175	-53.2076	0	C1313
1315	1.16277	0.33041	-0.55701	0.179136	0.825091	-0.492852	0.400438	-0.10153	-0.00490483	-0.836619	-0.420744	-0.355551	0.197721	34	20.0547	-34.6992	0	C1314
1316	0.052942	0.0457439	-0.141443	0.924624	-0.0138519	-0.483295	0.82411	-1.4934	1.07616	-0.510696	-1.27176	1.37684	0.254491	23	38.9802	-47.1307	0	C1315
1317	1.31706	0.118033	-1.09983	0.266523	0.490161	-0.642506	0.236198	0.966825	-0.0392423	-0.960478	-0.173328	-0.382682	0.499237	15	-10.2601	-34.9892	0	C1316
1318	1.03521	0.663913	-0.905006	-0.240437	1.04106	-0.662253	0.487451	-0.0884736	0.0971264	-0.841697	0.00821889	-0.306084	0.170809	33	15.7986	0.598099	0	C1317
1319	-0.553054	0.176088	0.103128	-0.720508	-1.10615	1.73861	-1.25792	-0.925845	0.157322	1.46268	1.74927	0.23657	0.0122378	5	-44.8085	23.8116	0	C1318
1320	-1.26358	-0.0851447	1.82231	-0.189514	-0.110892	-0.120116	-0.198362	0.614569	1.55875	0.135355	-1.16697	0.285809	-0.447245	23	29.9353	-64.6663	0	C1319
1321	1.59215	-0.277973	-0.421907	-0.0172619	0.102229	-0.207192	0.0240751	-0.0500724	-0.243569	-0.586341	0.149012	-0.488821	0.713944	28	-36.963	-49.0945	0	C1320
1322	2.03132	-0.44692	-0.848556	0.258391	-0.0953712	0.0816219	0.0322027	0.603937	-0.304482	-0.88662	-0.374264	-0.289781	0.816503	27	-24.7015	-70.5054	0	C1321
1323	-0.264843	0.376861	0.895099	0.536836	-0.669019	0.545288	-0.531805	-0.565152	-0.481704	0.810291	-0.277297	0.128403	-0.00161391	3	-50.912	-4.59175	0	C1322
1324	0.678424	0.795066	-1.00581	-0.129604	1.3462	-0.556105	0.762032	0.0998033	0.145842	-0.762138	-0.581153	-0.22508	-0.052207	19	24.4427	14.4337	0	C1323
1325	0.384398	0.378619	-0.528494	-0.389249	0.966004	-0.737097	0.515637	0.301961	0.121398	-0.576192	0.473741	-0.273406	-0.336225	9	-7.08261	22.3759	0	C1324
1326	-1.32196	-0.640279	0.25659	0.0119736	-0.889458	0.103583	0.614662	0.487322	0.582205	0.509601	0.181323	0.671624	0.00662497	22	55.2808	18.3366	0	C1325
1327	1.41203	0.193397	-0.741228	-0.0192314	0.725395	-0.528689	0.256864	0.236238	0.0916185	-0.94347	-0.416283	-0.357794	0.518672	34	9.25276	-36.6765	0	C1326
1328	1.79775	0.193133	-0.583102	0.130163	0.643486	-0.341347	0.0913251	0.361168	-0.26545	-0.855899	-0.286752	-1.00687	0.65909	11	0.540826	-62.1886	0	C1327
1329	0.984083	0.283367	-0.480769	0.363433	0.807706	-0.445806	0.285131	0.448835	-0.151484	-0.882779	-0.467682	-0.49414	0.0833124	34	16.4453	-28.4411	0	C1328
1330	1.21735	0.175231	-0.680244	0.0401622	0.465668	-0.549614	0.207632	0.227553	-0.0588121	-0.818949	-0.00755462	-0.342824	0.423201	15	-13.0895	-25.9915	0	C1329
1331	0.0656105	0.78756	-0.645017	0.227209	1.20961	-0.462324	0.207469	0.169157	-0.387177	-0.0436907	0.39302	-0.66673	-0.544747	4	-5.45571	46.7043	0	C1330
1332	-0.904991	0.500167	-0.0513675	-0.636247	0.959675	0.547913	0.166032	-2.08838	-0.34107	1.15258	2.57972	0.196421	-0.742182	10	24.1147	64.8582	0	C1331
1333	0.882551	0.347952	-0.651144	-0.258868	0.8004	-0.50327	0.282418	0.336205	-0.0241056	-0.654572	-0.0384892	-0.309751	0.0587945	26	6.7886	-6.77401	0	C1332
1334	0.851899	0.704008	-0.493396	-0.288822	1.24976	-0.397949	0.461913	0.457031	-0.186958	-0.813873	-0.620949	-0.514288	0.00169107	33	30.2272	-1.5778	0	C1333
1335	0.510213	0.656724	-0.491835	-0.346387	1.11723	-0.632043	0.458693	0.538612	-0.00299641	-0.654501	0.0196392	-0.467785	-0.369618	12	5.24518	18.4473	0	C1334
1336	0.661209	0.469787	-0.693888	-0.267011	0.927172	-0.595659	0.472908	0.372469	0.0183409	-0.620538	0.00499973	-0.384737	-0.054855	12	8.57379	5.91953	0	C1335
1337	-1.01574	0.843984	-0.286218	-0.143127	1.34846	0.218974	0.271251	-1.51294	-0.331684	0.882464	1.34967	-0.0137542	-0.858826	7	10.8115	77.5388	0	C1336
1338	2.1357	-0.5214	-0.226999	0.321071	-0.392298	0.0586305	-0.296656	0.659396	-0.633771	-0.941436	0.102528	-0.613885	0.931236	28	-41.575	-63.2728	0	C1337
1339	1.26522	0.337391	-0.724512	0.208746	0.895409	-0.365715	0.41126	0.0208158	-0.236705	-1.02394	-0.0458601	-0.630073	0.333725	34	10.9523	-43.9215	0	C1338
1340	1.23337	-0.121518	-0.505353	-0.193239	0.201396	-0.364997	0.147439	0.536207	-0.179586	-0.694867	0.262103	-0.32619	0.24565	18	-30.8856	-32.0208	0	C1339
1341	1.27829	0.142256	-0.815578	-0.247102	0.658521	-0.270663	0.364731	0.00460089	-0.147274	-0.618226	-0.245635	-0.301567	0.541526	34	6.83318	-37.1972	0	C1340
1342	0.671048	0.828488	-0.732687	-0.342776	1.14807	-0.690665	0.548718	0.283125	0.218447	-0.892745	-0.422952	-0.140133	-0.0408889	19	21.8524	16.4113	0	C1341
1343	-1.13147	0.909844	-0.127525	0.745352	1.29242	0.23988	0.33313	-1.80389	-0.0810975	0.726332	0.806602	-0.0363532	-1.0525	1	1.01717	84.1958	0	C1342
1344	-0.93034	-0.489482	2.00285	-0.197952	-0.211996	-0.173281	-0.329678	0.934662	1.6341	0.135493	-1.0848	0.0836218	-0.404442	23	30.8864	-64.5701	0	C1343
1345	-1.10709	0.461437	-0.114577	-0.622502	1.02159	0.435724	0.184114	-1.97212	-0.0803757	1.10199	2.53866	0.18096	-0.823511	10	22.8765	64.016	0	C1344
1346	-1.2074	0.537717	1.36279	1.41973	-0.802234	0.973522	-1.07969	-1.92886	-0.300446	1.51871	0.89511	0.371079	-0.281721	29	-91.3522	0.538804	0	C1345
1347	2.00393	-0.412579	-0.381758	0.503284	-0.0727395	-0.156881	-0.0596279	0.0195343	-0.251245	-1.10952	-0.254006	-0.208555	0.862456	27	-27.4505	-71.2115	0	C1346
1348	1.80311	-0.160508	-0.449296	0.26105	0.319018	-0.173546	-0.308946	0.614047	-0.550777	-0.692858	-0.0578897	-0.80143	0.627569	28	-28.4709	-56.2099	0	C1347
1349	-0.707059	-0.602549	0.886014	-0.497067	-1.19799	1.52534	-1.05401	-1.6911	-0.364049	2.14115	2.24315	0.959671	0.173931	32	-39.3167	57.6635	0	C1348
1350	-1.37175	-0.342593	2.06739	-0.847789	-0.613929	0.0150417	-0.307629	1.19714	1.67141	0.615036	-1.03772	0.334079	-0.151025	23	32.0377	-63.1702	0	C1349
1351	1.2682	0.308275	-0.445996	-0.0481052	0.879978	-0.516431	0.374401	0.0595927	0.000435	-0.90096	-0.63935	-0.179145	0.180289	24	30.2865	-25.2567	0	C1350
1352	1.37072	0.245395	-0.585511	-0.0761852	0.57313	-0.1995	0.0295713	0.131759	-0.203938	-0.761529	-0.112841	-0.408745	0.266931	15	-9.35691	-29.2777	0	C1351
1353	0.816456	0.843954	-0.387099	0.127437	1.25277	-0.57913	0.537449	-0.21209	0.211854	-0.921896	-0.758128	-0.30172	-0.222423	19	31.8522	11.0221	0	C1352
1354	-1.38077	-0.445738	0.351325	1.38176	-0.728547	-0.0988377	0.607845	1.47284	0.229596	0.361962	-1.19899	0.812078	-0.313144	8	61.1219	-14.9624	0	C1353
1355	1.8976	-0.382128	-0.587615	0.139444	-0.288602	-0.0768	-0.231224	0.750459	-0.210734	-0.722703	-0.0592147	-0.503375	0.725209	28	-43.9584	-58.5963	0	C1354
1356	1.44109	0.0503012	-0.490208	0.0986505	0.601204	-0.305565	0.0720605	0.322011	-0.156838	-0.986672	-0.154256	-0.539902	0.383775	11	0.299243	-46.6717	0	C1355
1357	0.762374	0.38686	-0.64128	-0.25405	0.729933	-0.357152	0.389145	0.479428	-0.067227	-0.583417	-0.0774102	-0.512651	0.00877668	31	-9.04606	-5.52999	0	C1356
1358	0.265873	1.02872	-0.600621	-0.421397	1.50537	-0.601882	0.586463	0.38165	-0.00466391	-0.492615	0.00408269	-0.571724	-0.627789	20	5.50619	33.7936	0	C1357
1359	-1.30602	-0.422618	3.59442	-0.325923	-0.248267	-0.676051	-0.0195293	-0.183432	1.453	-0.780167	-0.386421	0.51674	0.0869748	35	13.2111	-85.9806	0	C1358
1360	1.6808	0.00241039	-0.680478	0.18872	0.297546	-0.250798	-0.0145426	0.371717	-0.288474	-0.9828	-0.207217	-0.409985	0.698135	27	-13.2296	-63.5113	0	C1359
1361	2.04166	-0.465295	-0.397239	0.43986	-0.192942	-0.169082	-0.0626085	0.710054	-0.24763	-0.944258	-0.715806	-0.385109	0.9529	27	-25.0947	-69.7757	0	C1360
1362	0.91553	-0.119853	-0.448486	-0.237004	0.528001	-0.384444	0.412508	0.317906	0.0843905	-0.510543	-0.157701	-0.18686	-0.0285068	31	-14.1324	-12.9751	0	C1361
1363	0.753203	0.498481	-0.809548	-0.278838	1.04367	-0.614975	0.4972	0.777416	-0.0670828	-0.603637	-0.335844	-0.140095	-0.293016	12	6.38229	13.1685	0	C1362
1364	1.16964	-0.139706	-0.506273	-0.11273	0.342244	-0.463186	0.366877	0.342478	0.268877	-0.871479	-0.420804	0.0142421	0.29101	34	2.6441	-33.5891	0	C1363
1365	1.937	-0.450501	-0.618801	0.268809	0.461127	-0.16386	-0.0453873	0.523344	-0.375648	-0.90312	-0.299284	-0.618558	0.824661	28	-29.2044	-66.2943	0	C1364
1366	0.239165	0.548807	0.19346	-0.619748	-1.12036	2.73444	-0.900723	-1.753	-0.897375	2.43359	-0.926493	1.16787	0.882664	36	-59.13	46.9399	0	C1365
1367	0.682601	0.33284	-0.52945	-0.351507	0.741886	-0.603008	0.365905	0.580419	0.105528	-0.933363	0.133937	-0.248823	0.0180356	12	-2.55653	1.61833	0	C1366
1368	-1.00286	-0.556929	0.492397	-0.516786	-1.53733	1.31137	-1.05452	0.298309	-0.632983	1.99085	2.47777	0.611907	-0.228041	32	-27.5693	67.1838	0	C1367
1369	1.59197	-0.294835	-0.577346	0.248612	0.118131	-0.323498	0.286181	0.335676	-0.100664	-1.10858	-0.0495956	-0.312566	0.603429	28	-31.0544	-46.4379	0	C1368
1370	1.41797	0.267542	-0.880602	-0.146417	0.609981	-0.332561	0.184218	0.554354	-0.112046	-0.841731	-0.234062	-0.366012	0.292412	34	4.25788	-39.9091	0	C1369
1371	-0.701605	0.662249	-0.33221	-0.736266	1.04413	0.514975	0.186716	-2.24146	-0.201951	1.08716	2.22828	0.225354	-0.389736	7	23.9428	70.2969	0	C1370
1372	-1.46594	-0.596206	0.633287	0.436882	-1.07977	-0.0135899	0.715542	1.49393	0.586692	0.231399	-0.665267	0.825603	-0.189159	8	52.1489	-9.18235	0	C1371
1373	1.01666	0.602787	-0.731923	-0.289046	1.19634	-0.571272	0.415781	-0.235486	0.00144799	-0.860366	0.354374	-0.444002	-0.0291653	33	17.6985	5.22817	0	C1372
1374	1.10623	0.00909637	-0.264227	0.0910956	0.524506	-0.404924	0.104192	0.294101	-0.115093	-1.01718	0.0809544	-0.396829	0.240126	37	-18.3021	-18.2011	0	C1373
1375	0.834283	0.29222	-1.0494	-0.379439	0.844606	-0.512573	0.396359	0.686356	-0.0666249	-0.675418	0.497465	-0.254245	-0.142273	31	-14.8369	-2.75949	0	C1374
1376	0.459363	0.840854	-0.611078	-0.313006	1.21059	-0.584424	0.609062	-0.135333	0.155823	-0.79359	-0.0423229	-0.208582	-0.233049	19	19.509	16.968	0	C1375
1377	-1.37496	-0.312107	3.75912	-0.301934	-0.372288	-0.856768	-0.0435012	-0.535004	1.56908	-0.816887	-0.357128	0.751883	0.320071	35	10.0934	-87.7082	0	C1376
1378	0.190174	-0.0173611	1.06651	-0.535218	0.211172	-0.609441	-0.00518637	-0.0141183	0.427355	-0.632584	0.368489	-0.00944193	-0.212518	31	-16.2673	-7.77076	0	C1377
1379	0.620603	0.321318	-0.645799	-0.198855	0.931355	-0.472589	0.463967	0.431389	-0.0478979	-0.447801	-0.279741	-0.325078	-0.096307	12	-2.79456	6.02713	0	C1378
1380	1.51099	0.0305095	-0.74252	0.357565	0.547313	-0.253572	0.258113	0.0150073	-0.0531693	-1.11793	-0.243552	-0.491976	0.608779	11	-1.43578	-54.0512	0	C1379
1381	-1.12823	0.541774	-0.0134634	0.649319	1.06415	0.283659	0.155777	-1.87419	-0.255486	0.970331	1.47562	-0.0701782	-0.832379	1	1.11248	77.7073	0	C1380
1382	-1.1916	0.755493	1.40538	0.105564	1.16824	0.1687	0.240821	-2.43061	-0.274839	0.827234	1.90677	-0.0804351	-0.990267	10	12.7388	54.1852	0	C1381
1383	-1.29309	-0.379004	3.08347	-0.320807	-0.448324	-0.548605	-0.0427248	0.125602	1.6075	-0.663976	-0.786827	0.716601	0.18222	35	15.6407	-78.958	0	C1382
1384	-1.01743	0.00096	1.2258	-0.064372	-0.366081	0.0116631	-0.277404	1.05464	1.70115	0.237573	-0.841228	-0.126376	-0.713857	23	35.8379	-63.7864	0	C1383
1385	0.491584	0.45637	-0.261131	-0.439561	1.04798	-0.590908	0.377666	0.132734	0.120052	-0.601039	0.150533	-0.2754	-0.355981	9	-4.41239	21.2291	0	C1384
1386	1.33424	0.427271	-0.905625	-0.00113717	0.99366	-0.367681	0.334762	0.504341	-0.0274911	-1.06028	-0.45425	-0.540554	0.281942	34	16.3648	-42.4171	0	C1385
1387	1.65305	-0.000946	-0.770598	-0.0294028	0.464369	-0.26839	0.221676	0.366407	-0.0438752	-0.844331	-0.609533	-0.232735	0.510207	11	-3.5972	-49.8549	0	C1386
1388	1.57641	-1.01723	0.26528	0.49543	-1.49162	-0.0237082	-0.15747	1.02627	-0.144658	-0.182455	-0.368675	0.0103344	0.791877	30	-24.995	33.1482	0	C1387
1389	1.49068	-0.200394	-0.437406	-0.0275842	0.217461	-0.248683	0.258206	0.104569	-0.0636964	-1.011	-0.239058	-0.0696912	0.534648	15	-17.784	-34.1672	0	C1388
1390	-1.12936	-0.0606949	1.91502	-0.130383	-0.521031	-0.108696	-0.206704	0.618725	1.73461	0.379144	-1.35885	0.209702	-0.269178	23	30.8514	-63.6888	0	C1389
1391	-1.18689	-0.417434	1.5447	0.845028	-0.248164	-0.302905	-0.105138	0.378996	0.849164	-0.221925	-0.640704	0.258091	-0.151319	23	22.9509	-55.3059	0	C1390
1392	1.33248	-0.103104	-0.739224	0.189319	0.406714	-0.391011	0.11441	0.39212	-0.0509549	-0.990585	-0.0223681	-0.234835	0.436971	15	-16.4896	-30.6085	0	C1391
1393	1.0504	0.234257	-0.394934	0.123279	0.835889	-0.437619	0.459176	-0.175782	-0.0164487	-0.926793	-0.358152	-0.228722	0.117149	34	20.1527	-34.0772	0	C1392
1394	0.755869	0.668054	-0.585475	-0.332469	1.02531	-0.677409	0.386325	0.225453	0.202563	-0.684799	-0.155351	-0.432844	-0.0406614	12	9.576	5.8552	0	C1393
1395	-1.08032	-0.195388	0.364462	0.180762	-0.721719	-0.39617	0.390332	1.39137	0.47598	0.15673	-0.497504	0.441465	0.0733679	8	45.6299	-2.978	0	C1394
1396	1.32658	-0.22081	-0.275903	0.257176	0.414065	-0.493908	0.0768236	0.38862	-0.188798	-0.922627	-0.179529	-0.170482	0.262552	2	-10.8577	-46.1411	0	C1395
1397	1.7758	-0.0238578	-0.780221	0.272375	0.473373	-0.0464044	-0.132948	0.266891	-0.527777	-0.809822	-0.204066	-0.473976	0.644995	27	-17.2811	-66.1619	0	C1396
1398	1.16506	0.235638	-0.507525	-0.21926	0.772629	-0.496742	0.352001	0.226023	-0.0520808	-0.870546	-0.0181227	-0.44365	0.165717	26	6.52542	-12.2513	0	C1397
1399	-0.290584	0.339948	-0.00898593	0.206509	0.968019	-0.66197	0.413825	0.994542	-0.0188463	-0.532022	0.194006	-0.404339	-0.85464	9	-18.01	25.4091	0	C1398
1400	1.58056	0.301453	-0.614386	0.1913	0.826989	-0.363327	0.0157327	0.787817	-0.532233	-0.776048	-0.50106	-0.798369	0.400448	27	-9.56785	-57.8247	0	C1399
1401	-0.893426	1.00996	-0.627086	0.013345	1.55818	0.478023	0.607131	-1.90732	-0.136414	1.01548	0.781229	-0.0257173	-0.874411	7	14.4983	81.0623	0	C1400
1402	1.05639	0.0860612	-0.0915365	0.741518	0.658084	-0.590714	0.37758	-0.00105635	0.143945	-0.958096	-0.988543	-0.171359	0.13752	34	24.4412	-39.3438	0	C1401
1403	1.56186	-0.130263	-0.882576	0.0614005	0.273611	-0.302702	0.0110043	0.633878	-0.316256	-0.911471	0.268116	-0.426141	0.609053	18	-27.122	-33.8291	0	C1402
1404	0.909673	-0.187055	-0.606247	0.239986	0.394409	-0.407417	-0.197859	1.1171	-0.846976	-0.0419998	0.58301	-0.687733	0.114492	18	-43.6398	-23.4885	0	C1403
1405	1.45471	-0.171383	0.0627402	0.290535	0.0323708	-0.310739	-0.15655	0.206918	-0.0950993	-0.894254	-0.317609	-0.294036	0.444333	2	-16.3834	-48.225	0	C1404
1406	1.22227	-0.315902	-0.343067	-0.185526	0.121505	-0.373532	0.0687869	0.911477	-0.237251	-0.81589	0.32328	-0.371155	0.28808	37	-39.8337	-20.4677	0	C1405
1407	1.23102	0.0371399	-0.35991	0.334914	0.256353	-0.522408	0.0900251	0.245466	0.0989903	-0.854496	-0.206103	-0.309667	0.202661	2	-10.8042	-45.6263	0	C1406
1408	1.25689	-0.227884	-0.321727	0.530246	0.321654	-0.548525	-0.106747	0.5745	-0.229633	-0.982769	0.276748	-0.479159	0.285777	18	-35.0293	-30.5579	0	C1407
1409	-1.25038	0.0242373	1.7386	-0.518895	-0.142276	-0.0585466	-0.184498	0.784772	1.6291	0.407046	-1.17584	0.174364	-0.484265	23	31.7709	-64.0248	0	C1408
1410	-0.952048	-0.492235	1.35215	-0.0232595	-0.856048	0.450843	-0.0565868	-0.755945	0.374135	0.862603	-0.12581	0.752901	0.00645726	29	-77.6818	-12.0963	0	C1409
1411	-1.09904	0.809789	0.632025	0.278981	1.275	-0.173922	0.296516	-1.23573	0.232402	0.234918	0.668206	-0.269456	-1.08231	7	13.9515	84.6186	0	C1410
1412	1.76282	-0.0395771	-0.350386	0.349235	0.404761	-0.103854	-0.0621822	-0.20522	-0.252125	-1.16311	-0.11341	-0.543255	0.737853	27	-23.1492	-62.2873	0	C1411
1413	-0.386032	0.219987	0.550284	-0.608796	-0.661737	1.79659	-0.722712	-2.07657	1.36475	1.91282	-1.17725	1.06078	0.395355	6	-68.4151	19.911	0	C1412
1414	1.67949	0.641292	-1.12515	0.233915	1.09467	-0.261352	0.36803	-0.223845	0.0234379	-1.05785	-0.654807	-0.702722	0.740171	11	5.44462	-59.546	0	C1413
1415	-0.615229	0.373003	1.22939	-1.45908	-1.2331	1.85467	-0.331485	-1.34681	0.602437	1.46134	0.53881	0.390566	0.140719	5	-49.3588	30.1373	0	C1414
1416	1.13174	-0.309797	-0.523025	0.432737	-0.0308336	-0.431372	0.0775434	0.710466	-0.437441	-0.817082	0.6688	-0.35507	0.221507	18	-37.6436	-27.2413	0	C1415
1417	-0.862754	0.503095	-0.338029	-0.747603	1.04593	0.717683	0.154955	-1.28333	-0.339732	1.31991	1.09814	0.248438	-0.77881	7	14.2653	70.2172	0	C1416
1418	-0.335433	-0.118163	0.319332	-0.729423	-1.3567	1.9769	-1.55705	-1.68617	-0.475886	1.81294	3.06942	0.6542	0.527843	30	-34.2704	40.143	0	C1417
1419	-0.916674	1.19884	-0.444495	-0.532203	1.77795	0.375923	0.802256	-2.20574	0.0414141	0.783712	1.14274	0.0486332	-0.748905	7	19.054	82.1141	0	C1418
1420	-1.20336	-0.605703	0.788247	1.25875	-1.00207	0.437825	0.0949797	0.217941	0.256064	0.883757	-0.949101	0.466284	0.15204	38	71.3852	-1.50365	0	C1419
1421	1.13958	0.0614772	-0.381341	0.00972209	0.570726	-0.401105	-0.138529	0.555793	-0.319033	-0.86976	0.574601	-0.591452	0.0799402	37	-28.281	-22.788	0	C1420
1422	1.4949	-0.421231	-0.372767	0.236607	0.0876664	-0.377814	0.0199028	0.696976	-0.409687	-0.821618	-0.0515048	-0.220879	0.47622	18	-41.6675	-42.2719	0	C1421
1423	0.515069	0.689666	-0.522148	-0.380807	1.2419	-0.685889	0.762989	0.267192	0.178392	-0.726921	-0.73482	-0.0507061	-0.121476	19	14.0718	16.9076	0	C1422
1424	-1.14536	-0.558086	2.59705	-0.515969	-0.567716	-0.586849	-0.251727	1.81928	1.23785	-0.4377	-1.09159	0.51379	0.2015	23	26.2505	-72.7203	0	C1423
1425	-1.25469	-0.279549	3.52875	-0.177108	-0.283735	-0.641959	-0.233433	-0.37493	1.62797	-0.769284	-0.96864	0.754376	0.412235	35	8.8276	-84.9967	0	C1424
1426	1.08186	-0.11987	-0.7565	-0.108416	0.255783	-0.326788	0.0452915	0.484331	-0.114301	-0.462577	0.572502	-0.403502	0.107684	37	-35.7924	-7.03538	0	C1425
1427	1.02862	0.376389	-0.367048	-0.191201	0.904124	-0.558364	0.389927	-0.246487	-0.155576	-0.796351	0.0855668	-0.352646	0.160914	33	14.4037	-2.59939	0	C1426
1428	0.856195	-0.0190029	-0.160957	-0.301984	0.361334	-0.473425	-0.186227	0.533215	-0.598616	-0.330763	1.02432	-0.641575	0.246011	37	-36.926	-5.48579	0	C1427
1429	1.40109	0.352785	-0.639538	-0.189302	0.775052	-0.429759	0.106981	0.293905	-0.358282	-0.799798	0.0510394	-0.58773	0.40047	15	-7.34452	-28.0914	0	C1428
1430	0.0177271	0.279429	0.0153623	-0.366797	-1.0859	2.57902	-1.13131	-1.98768	-0.881297	2.42139	0.413818	1.11709	0.689236	36	-51.5444	46.7286	0	C1429
1431	0.655901	0.727312	-0.604961	-0.320003	1.3468	-0.693266	0.568609	0.126365	0.120933	-0.765532	-0.208746	-0.382031	-0.160973	19	21.1751	13.4823	0	C1430
1432	-0.111223	-0.0935881	0.011958	-0.563736	-0.838957	2.28325	-0.848084	-1.58271	-0.574032	2.68033	-0.764913	1.31894	0.681073	36	-58.0949	43.1599	0	C1431
1433	1.53437	0.0934544	-0.431771	0.398788	0.62807	-0.507744	0.247486	0.290922	-0.126215	-1.10702	-0.283868	-0.563405	0.256221	11	1.98602	-48.4972	0	C1432
1434	1.25678	0.0392381	-0.509895	0.00242219	0.542204	-0.334755	0.0252221	0.532594	-0.179676	-0.640763	0.138847	-0.564683	-0.0436926	37	-26.1942	-19.1931	0	C1433
1435	-1.06521	-0.128066	2.05874	0.11453	-0.632924	0.385445	-0.936112	0.217729	1.16309	0.620036	-0.530987	0.156509	-0.432485	23	30.2551	-55.3379	0	C1434
1436	0.498527	0.373444	-0.596809	-0.161847	0.98046	-0.692977	0.573131	0.430963	0.232676	-0.742068	-0.297881	-0.106889	-0.17759	12	8.41397	14.5728	0	C1435
1437	0.301889	-0.861525	0.166294	1.18616	-1.0626	-0.12482	0.357642	-0.462817	0.115765	0.0761104	0.442437	0.4983	-0.165509	14	57.3682	37.768	0	C1436
1438	-0.992638	0.865367	-0.197568	-0.352397	1.39052	0.411934	0.472507	-1.91273	-0.126302	1.0871	1.05072	0.127839	-0.780106	7	14.986	78.896	0	C1437
1439	-1.2363	-0.471393	0.953948	0.271403	-0.745564	-0.273324	0.543349	1.04525	0.325449	0.114054	-0.212553	0.539592	-0.195182	22	50.9148	9.82566	0	C1438
1440	0.868273	0.555646	-0.742238	-0.25224	1.09963	-0.474415	0.369335	0.707369	-0.00981425	-0.732621	-0.281851	-0.516391	-0.191096	33	26.3043	-3.5115	0	C1439
1441	-0.45387	0.698327	-0.3714	-0.0755227	1.21982	-0.943403	0.51817	0.792539	0.0768062	-0.439019	0.051214	-0.194423	-0.495501	20	-2.41608	33.9899	0	C1440
1442	0.525664	0.385993	-0.602787	-0.16789	0.973743	-0.770184	0.567338	0.623866	-0.00406564	-0.812198	-0.0707935	-0.0626389	-0.239559	12	-9.24543	9.44263	0	C1441
1443	-0.954091	-0.300756	2.23947	-0.300855	-0.702582	-0.192975	-0.457348	0.206501	1.27798	0.0531064	-0.661807	0.447816	0.154105	23	23.1329	-68.2857	0	C1442
1444	1.36346	0.234174	-0.877162	0.01868	0.75871	-0.482045	0.471291	-0.264524	0.238822	-0.978716	-0.410556	-0.063436	0.453013	34	16.7491	-37.8663	0	C1443
1445	1.17648	-0.0939688	-0.667718	-0.254791	0.392591	-0.410171	-0.0975778	0.854124	-0.311656	-0.552059	0.428202	-0.376082	0.234336	37	-31.9101	-14.3817	0	C1444
1446	-1.45565	-0.259235	3.30262	-0.347636	-0.748096	-0.47418	-0.412362	0.143364	1.72427	-0.309694	-0.471825	0.470655	0.195524	35	15.0522	-82.0041	0	C1445
1447	1.28039	-0.313476	-0.558423	-0.198645	0.395463	-0.326522	0.186886	0.38524	-0.130752	-0.913706	0.202196	-0.147162	0.444518	15	-18.5194	-22.8634	0	C1446
1448	0.180357	0.461859	0.094456	-0.646867	-1.12218	2.74991	-0.842503	-2.12599	-0.401851	2.38706	-0.588834	1.12023	0.899423	36	-57.3168	48.2942	0	C1447
1449	1.09245	0.580684	-1.44825	-0.534971	1.08755	-0.455125	0.545994	0.652445	-0.124519	-0.700214	0.163466	-0.208582	0.26211	26	-1.69242	-7.92075	0	C1448
1450	-1.1065	0.535936	-0.0548839	-0.864962	1.05324	0.679153	0.0833843	-2.20193	-0.141584	1.22681	2.99552	0.242512	-0.830487	10	30.3391	60.151	0	C1449
1451	0.865279	0.592787	-0.822656	-0.0511944	1.05607	-0.586038	0.501081	-0.0502835	0.0974874	-0.818313	-0.0280885	-0.397101	0.0269917	33	15.8168	0.9251	0	C1450
1452	-0.788593	1.329	-0.700336	-0.267988	1.7784	0.406091	0.843376	-2.51008	0.200472	0.889778	0.884221	0.105521	-0.706737	7	18.7066	82.7892	0	C1451
1453	0.626218	0.852703	-0.686233	-0.323305	1.3672	-0.764288	0.532163	0.251127	0.0428046	-0.733144	0.0538898	-0.544828	-0.214949	19	19.6472	12.0762	0	C1452
1454	1.05293	0.172193	-0.513106	-0.479936	0.572504	-0.639658	0.312131	0.381539	0.0542022	-0.644361	-0.044148	-0.214275	0.273533	31	-12.7604	-12.8069	0	C1453
1455	1.3103	0.338869	-0.310311	-0.0858494	0.563738	-0.423207	0.118543	0.323425	-0.258511	-0.741988	-0.43324	-0.407068	0.293355	15	-0.700228	-34.2024	0	C1454
1456	1.26958	0.18806	-0.528848	0.368099	0.770122	-0.387009	0.179982	0.372364	-0.246324	-0.967273	-0.235097	-0.642438	0.217164	11	9.16257	-46.9382	0	C1455
1457	0.930353	0.423833	-0.836047	-0.227939	1.00683	-0.408822	0.364097	-0.286242	-0.0915028	-0.576199	0.361764	-0.37011	0.0480204	26	5.3358	-3.65553	0	C1456
1458	-0.671436	-0.597539	0.783617	-0.575275	-1.44621	1.33358	-0.929502	-0.367538	-1.12074	2.15962	1.90259	0.987665	0.154534	32	-32.116	59.6442	0	C1457
1459	1.34843	0.200749	-0.564526	-0.0841405	0.318112	-0.332676	0.0162251	0.111491	-0.172477	-0.57927	-0.197759	-0.286899	0.466693	15	-11.6734	-37.7583	0	C1458
1460	1.34502	0.220599	-0.724048	0.00691454	0.812566	-0.350956	0.317907	0.0991053	0.00945434	-0.825416	-0.603416	-0.379346	0.44884	34	15.8267	-39.5376	0	C1459
1461	-0.607777	0.0961938	-0.135573	0.761489	-0.0508929	-0.554819	0.796634	-1.16077	1.14723	-0.432732	-0.977501	1.47202	0.161996	23	38.9413	-47.1008	0	C1460
1462	1.37633	0.0269695	-0.654069	-0.029249	0.535549	-0.332871	0.168012	0.546313	-0.165806	-0.865626	-0.317139	-0.383783	0.445337	15	-6.7429	-39.1935	0	C1461
1463	-0.203691	0.772389	-0.646394	-0.287989	1.28945	-1.02049	0.788231	0.709845	0.30849	-0.511538	0.259922	-0.162158	-0.748389	20	0.460685	34.5833	0	C1462
1464	-0.808338	-0.0576657	-0.123211	0.445941	0.352644	0.540238	-0.343641	-1.08656	-0.783259	1.22433	1.91182	-0.00596766	-0.625443	1	5.41179	62.4696	0	C1463
1465	-0.577681	0.146097	0.100468	-0.772102	-1.17524	1.64283	-1.40976	-0.956001	0.432156	1.33986	2.10001	0.257386	0.114177	5	-42.6967	24.6095	0	C1464
1466	-0.796638	-0.927202	0.87894	-0.697232	-1.30713	1.07292	-1.19397	0.38711	-0.946057	1.91966	2.66622	0.710097	-0.0697099	32	-28.6378	70.0983	0	C1465
1467	-1.11668	0.42444	0.598903	-0.521533	0.968618	0.417267	0.135125	-2.28521	-0.0409952	0.944844	2.15203	0.29098	-0.675257	10	26.1114	61.7284	0	C1466
1468	0.974243	0.527736	-0.533278	-0.0826241	0.990605	-0.538342	0.248916	0.262091	-0.197844	-0.91866	0.168393	-0.666279	0.103529	26	4.25088	-14.4062	0	C1467
1469	1.0521	0.456703	-1.18709	-0.330838	0.890695	-0.335601	0.331529	0.171526	-0.0482259	-0.543326	0.298899	-0.364011	0.0879536	26	-0.312332	-8.98891	0	C1468
1470	0.452621	0.511711	-0.649518	-0.0942636	0.89222	-0.659001	0.380692	0.0241522	0.20394	-0.578141	0.115797	-0.0934206	-0.254198	9	-0.833561	19.1599	0	C1469
1471	1.33086	0.186646	-0.533213	-0.236806	0.569071	-0.323054	0.180623	0.637524	-0.31631	-0.671652	-0.431065	-0.41423	0.344556	15	-5.82773	-34.7755	0	C1470
1472	1.12525	0.249029	-1.01204	-0.112938	1.02956	-0.40759	0.337304	0.73993	0.0655595	-0.654248	-0.190184	-0.79617	0.136112	26	8.64185	-17.7435	0	C1471
1473	1.31709	0.380692	-0.658429	0.31031	0.950046	-0.424294	0.254828	0.0959363	-0.142817	-0.957145	-0.385175	-0.576319	0.232081	34	21.438	-36.1296	0	C1472
1474	0.788425	-0.112131	-0.465542	0.292834	0.336442	-0.533705	0.268961	0.556484	0.132286	-0.889281	0.0731159	-0.0795904	-0.14051	21	-30.5662	-1.87105	0	C1473
1475	1.45216	-0.0613463	-0.466642	0.527742	0.216555	-0.350074	0.0345539	0.389623	-0.167846	-0.996393	-0.276323	-0.396485	0.429028	2	-10.6659	-51.0918	0	C1474
1476	1.19714	-0.00488841	-0.938826	-0.227971	0.548832	-0.493869	0.477432	0.551563	0.0323321	-0.852509	-0.0746682	-0.11222	0.314026	15	-12.5186	-22.8941	0	C1475
1477	0.857182	0.421133	-0.755427	-0.361311	1.00618	-0.533916	0.441507	0.189993	0.0890638	-0.707045	0.208396	-0.391617	-0.116934	12	2.46646	0.919012	0	C1476
1478	-0.249515	0.455696	0.822237	-0.813124	-0.612667	2.15647	-1.10969	-1.86876	1.00563	1.93516	-1.2744	0.771482	0.567923	6	-72.0484	18.9369	0	C1477
1479	1.15269	0.335464	-0.195309	0.104386	0.817762	-0.515336	0.114742	0.275262	-0.284696	-0.817269	-0.0794494	-0.761103	0.172649	26	1.9496	-20.3977	0	C1478
1480	1.38351	0.287646	-0.541563	0.352525	0.827725	-0.284551	0.2466	-0.105676	-0.249497	-1.04857	-0.35655	-0.456415	0.312396	34	20.2406	-36.9807	0	C1479
1481	-0.0645384	-0.0547549	-0.165189	-0.713475	-0.82676	2.34285	-1.03529	-1.65064	-0.656209	2.43056	-0.0678274	1.09023	0.869672	36	-54.6001	44.3274	0	C1480
1482	1.5464	0.232499	-0.699643	0.0539012	0.660687	-0.324537	0.251144	0.138118	-0.116106	-1.04027	-0.363299	-0.47679	0.558854	11	5.161	-50.946	0	C1481
1483	1.30803	0.115876	-0.732184	-0.0866689	0.823178	-0.340217	0.302618	0.532925	-0.253087	-0.899171	-0.248095	-0.415643	0.290404	34	9.14038	-26.6234	0	C1482
1484	-0.36848	0.48995	0.00900082	-0.840805	-1.14526	2.00567	-1.38271	-0.823559	0.459574	1.093	1.36246	0.0657103	0.219257	5	-47.2723	22.7844	0	C1483
1485	0.355704	1.21741	-0.748149	-0.362243	1.60856	-0.774102	0.666263	0.567392	0.00062	-0.73483	-0.182144	-0.668165	-0.384191	20	14.6966	29.5849	0	C1484
1486	1.79358	-0.191071	-0.632994	0.409047	0.331513	-0.279647	0.134451	-0.0362551	-0.167234	-1.04813	0.0066637	-0.504002	0.631829	27	-24.3908	-64.007	0	C1485
1487	-1.15499	0.299512	1.75504	0.928064	-0.846349	0.0441827	-0.846371	-0.0988545	0.131303	0.917493	-0.600902	0.700286	-0.221566	3	-54.3961	3.09121	0	C1486
1488	1.04144	0.129756	-0.270359	-0.121492	0.625903	-0.52083	0.139079	0.771387	-0.25692	-0.896175	0.216728	-0.66758	0.114058	37	-26.5546	-17.8014	0	C1487
1489	0.707612	0.132005	-0.15934	0.497641	0.702359	-0.824523	0.417374	0.329211	0.14744	-0.979178	-0.314769	-0.249135	-0.109506	24	17.4444	-12.9308	0	C1488
1490	-0.226042	-0.181694	0.787576	-0.643807	-1.26738	2.09618	-1.00575	-1.96413	-0.332268	2.2923	0.817912	1.03547	0.444895	36	-47.7318	43.5597	0	C1489
1491	-1.09522	0.830462	-0.0434918	-0.0505455	1.36318	0.223157	0.446996	-1.74432	-0.137025	0.819897	1.43935	-0.115069	-1.06411	7	10.1863	82.333	0	C1490
1492	1.26984	0.472835	-0.60593	-0.162105	0.878124	-0.584581	0.178367	0.28957	-0.240381	-0.710924	0.0896395	-0.714902	0.22171	26	3.01517	-15.6533	0	C1491
1493	0.779672	0.311175	-0.279694	-0.302343	0.975948	-0.576165	0.169981	0.396395	-0.00788258	-0.713256	0.0960307	-0.516333	-0.0662258	12	-0.0149302	5.11716	0	C1492
1494	-0.987321	-0.804395	0.690308	-0.675414	-1.5943	1.22606	-1.35627	0.655991	-0.660191	1.96512	3.20729	0.70138	-0.232151	32	-28.6564	74.4088	0	C1493
1495	0.442304	0.598491	-0.537898	-0.388386	1.14328	-0.683428	0.521234	0.853931	-0.0578664	-0.571808	-0.399653	-0.301555	-0.232611	12	5.14678	15.0829	0	C1494
1496	-0.1927	0.432388	-0.00302228	-0.870642	-0.972283	2.15493	-1.35142	-1.79459	0.457611	1.40983	1.482	0.259748	0.44703	5	-46.664	28.5119	0	C1495
1497	1.02875	0.0296728	-0.381423	-0.277636	0.42874	-0.436748	0.340132	0.329458	0.0609345	-0.793068	-0.118546	-0.176638	0.17797	31	-13.7119	-14.0333	0	C1496
1498	1.36222	-0.226052	-0.378875	0.301041	0.0495535	-0.395678	0.0291365	0.566704	-0.271078	-0.871575	0.140474	-0.322434	0.30238	18	-39.0088	-37.3481	0	C1497
1499	1.32123	-0.1542	-0.750268	-0.118351	0.264337	-0.397594	0.0329245	0.670677	-0.216694	-0.637223	0.545945	-0.573265	0.363397	18	-36.3802	-25.5562	0	C1498
1500	-1.15857	0.652007	0.311391	-0.576378	1.15341	0.318306	0.283368	-2.50378	0.113345	0.845334	3.0068	0.155417	-0.860473	10	29.2613	57.1607	0	C1499
1501	1.71496	-0.0278568	-0.455902	0.187245	0.397072	-0.197148	0.160286	-0.11788	-0.0741582	-1.11098	-0.547715	-0.263581	0.768305	11	2.95155	-56.8972	0	C1500
1502	1.51305	-0.057322	-0.0910247	0.114685	0.427812	-0.232468	-0.0530525	0.0136733	-0.229149	-0.954511	-0.12601	-0.359864	0.324173	2	-16.0777	-47.4878	0	C1501
1503	1.9288	-0.513635	-0.286206	0.313517	0.0190154	-0.128948	0.0506906	0.449538	-0.39956	-1.05983	-0.116013	-0.587389	0.827746	27	-27.4687	-67.9258	0	C1502
1504	-0.227149	-0.303593	-0.283821	-0.604737	-1.22141	2.09381	-1.20071	-1.87265	-0.65871	2.42818	2.33502	1.09169	0.719414	30	-37.4365	48.0487	0	C1503
1505	0.946974	0.346872	-0.982604	-0.00561888	1.04107	-0.491498	0.401981	0.268217	-0.0343654	-0.528382	0.120732	-0.61182	-0.0481829	26	2.46177	-10.0487	0	C1504
1506	1.30237	0.561226	-0.987094	0.0709281	1.00932	-0.495654	0.366631	0.233495	-0.0855512	-0.797334	-0.3516	-0.636872	0.327975	24	18.519	-23.9417	0	C1505
1507	1.48525	0.141281	-0.468663	-0.0672099	0.616833	-0.412205	0.192691	0.275012	-0.204144	-0.904058	-0.345121	-0.389884	0.424677	15	-0.650784	-34.9869	0	C1506
1508	1.43469	0.450649	-0.866735	0.0479651	0.753649	-0.37281	0.314286	-0.0797834	-0.163745	-0.859	-0.22327	-0.593507	0.598694	34	11.4459	-43.3375	0	C1507
1509	0.24612	0.682572	-0.28934	-0.267712	1.17647	-0.777683	0.548211	0.730087	0.0791555	-0.623537	-0.14821	-0.340089	-0.640554	20	3.83069	26.1931	0	C1508
1510	-0.589207	-0.873549	0.980684	-0.349995	-1.36217	1.42455	-1.43841	-1.14279	-0.342328	2.29279	2.57059	0.846365	0.0381688	32	-38.5147	61.5238	0	C1509
1511	-1.02686	0.826156	-0.421409	-0.264688	1.23738	0.351063	0.413383	-1.6721	-0.211795	1.004	1.31987	-0.0282031	-0.692623	7	11.6583	77.9166	0	C1510
1512	0.582641	0.0131004	-0.589225	-0.487741	0.484993	-0.56103	0.368511	0.444711	0.0341701	-0.365026	0.509859	-0.0052028	-0.208179	21	-18.1256	10.336	0	C1511
1513	0.805477	0.577457	-0.641299	-0.123914	1.05319	-0.434769	0.284553	0.468962	-0.100579	-0.680618	0.038858	-0.644311	-0.26077	12	3.43123	5.19575	0	C1512
1514	0.994106	0.407197	-0.543445	-0.0834498	0.981337	-0.611505	0.407795	0.423507	0.0938378	-0.917648	-0.630281	-0.319004	0.176419	24	29.9992	-13.1538	0	C1513
1515	1.03896	0.735015	-0.784312	-0.061616	1.2447	-0.50535	0.29351	-0.332013	-0.0304327	-0.641564	-0.00706042	-0.669728	0.138453	33	21.2681	6.55145	0	C1514
1516	1.02539	0.062335	-0.588542	-0.361719	0.702739	-0.354724	0.331611	0.356098	-0.0784178	-0.596049	-0.19097	-0.145067	0.0757452	31	-11.0775	-7.89431	0	C1515
1517	1.29186	0.177625	-0.438062	0.603665	0.60171	-0.44614	0.195414	-0.0469543	-0.258668	-0.974307	-0.171345	-0.388977	0.186644	11	10.7344	-54.1035	0	C1516
1518	1.09713	0.31149	-0.748001	0.111954	0.903039	-0.458661	0.29719	0.462622	-0.179694	-0.787753	-0.133259	-0.656153	0.152378	24	14.5191	-23.6132	0	C1517
1519	0.0648587	0.919271	-0.783578	-0.528961	1.43998	-0.652524	0.569353	0.461435	0.260203	-0.473686	0.257193	-0.46027	-0.562036	20	4.02703	33.1689	0	C1518
1520	-0.605136	0.0394102	0.164488	-1.00393	-1.31163	1.76476	-1.39797	-0.317215	0.155203	1.53388	1.94676	0.304163	-0.0043654	5	-44.1868	22.2963	0	C1519
1521	1.03366	-0.0568051	-0.506921	0.180689	0.202311	-0.600854	0.446089	0.0902085	0.209856	-0.589106	-0.349072	-0.0228572	0.178112	34	4.39022	-33.3078	0	C1520
1522	1.67603	0.0850134	-0.486737	0.131121	0.401943	-0.12684	-0.0520291	0.463942	-0.435713	-0.877324	-0.235782	-0.836164	0.705814	27	-15.4468	-61.1934	0	C1521
1523	-0.0512868	0.314493	0.578905	-0.616087	-1.11967	2.407	-0.801212	-1.88418	-0.515386	2.58429	-0.890747	1.20555	0.682376	36	-60.0794	41.1616	0	C1522
1524	0.932269	0.719274	-1.07672	-0.367584	1.37969	-0.563996	0.468691	0.594169	-0.017506	-0.712589	-0.00791786	-0.83051	0.113969	33	25.1682	6.84287	0	C1523
1525	1.42539	0.150593	-0.658272	0.308723	0.663103	-0.391447	0.0725259	0.184174	-0.184994	-0.755767	-0.22538	-0.581403	0.345671	11	4.48573	-47.5174	0	C1524
1526	0.586875	0.915371	-0.448609	-0.325213	1.39851	-0.770443	0.578181	0.715569	0.0695651	-0.63477	-0.75425	-0.492237	-0.334505	19	28.3776	22.5992	0	C1525
1527	0.897669	0.710327	-0.543882	-0.25543	1.23836	-0.619116	0.591027	0.367486	-0.147401	-0.79013	-0.302497	-0.627907	-0.100577	33	27.3796	2.85565	0	C1526
1528	1.69871	-0.335141	-0.261499	0.497617	0.0926645	-0.270096	-0.0994182	0.170358	-0.182252	-0.74062	-0.0310066	-0.670452	0.488072	27	-25.2633	-61.8958	0	C1527
1529	1.06498	0.186748	-0.760759	-0.188281	0.716974	-0.408704	0.263327	0.530803	-0.0148989	-0.800688	-0.0157695	-0.314851	0.0608702	31	-8.28906	-8.85222	0	C1528
1530	1.54964	0.0969227	-0.536233	-0.0600801	0.624074	-0.324303	0.194794	0.465494	-0.45991	-0.977329	0.019267	-0.69759	0.529899	2	-18.9293	-43.7986	0	C1529
1531	-0.296364	-0.63364	0.0746501	-0.407808	-1.36259	1.95528	-0.710314	-1.56011	-0.865015	2.90316	1.14544	1.43996	0.301304	32	-38.9672	54.0353	0	C1530
1532	-0.616139	0.250576	-0.314879	0.16783	0.718535	0.292854	-0.0707245	-0.0707635	-0.619259	0.785003	1.01212	-0.23639	-0.963046	4	-8.54649	56.4559	0	C1531
1533	-1.13566	0.0027822	1.75173	0.0568477	-0.184531	-0.331198	-0.0916757	0.62041	0.846311	-0.0567949	-0.328378	0.00491771	-0.499475	23	24.4995	-60.6096	0	C1532
1534	-0.194105	0.310332	-0.307724	0.019069	0.753456	-0.182138	0.0185648	0.0717734	-0.559364	0.401724	1.27307	-0.506158	-0.807844	4	-8.02553	54.1819	0	C1533
1535	-0.0420511	0.730072	-0.131796	-0.661522	-0.715763	2.42482	-1.08915	-1.7127	1.12423	1.75007	-1.28234	0.634833	0.542735	6	-71.6482	25.9378	0	C1534
1536	-0.84011	0.0964908	1.56553	0.415844	-0.595091	-0.127129	-0.0782659	0.800226	0.0561717	0.403233	-0.322143	0.126104	-0.815749	23	31.2512	-55.3224	0	C1535
1537	1.30909	0.118865	-0.652633	-0.27045	0.663414	-0.33282	0.438772	0.281299	0.116279	-0.841009	-0.288471	-0.482931	0.282201	34	9.49307	-29.3682	0	C1536
1538	0.916834	0.383801	-0.795795	-0.406246	0.993268	-0.446725	0.646439	0.476896	0.222892	-0.781239	-0.704739	-0.0644916	0.00408936	33	21.6752	-3.06822	0	C1537
1539	1.13749	-0.445689	-0.613303	0.138709	0.204504	-0.47998	0.2961	1.13922	-0.0468867	-0.793189	0.145484	-0.326617	-0.00171833	37	-38.0612	-15.0928	0	C1538
1540	-0.223796	0.32432	0.209035	-0.609362	-0.729883	2.15756	-0.66986	-1.75632	0.681784	2.0786	-1.26531	0.866045	0.445784	6	-66.6561	24.3655	0	C1539
1541	-0.952672	0.399841	0.0268123	-0.728876	0.788968	0.648186	-0.0171161	-2.33338	-0.0192761	1.38408	2.64026	0.250668	-0.316942	10	26.1926	66.4155	0	C1540
1542	-0.872446	0.682393	-0.456861	0.420322	1.10662	0.177926	0.0777205	-0.727501	-0.322204	0.645191	0.914719	-0.196647	-1.01161	1	-4.77551	66.7174	0	C1541
1543	1.31394	-0.280219	-0.824863	0.136015	0.237477	-0.310167	0.242518	0.506556	0.0482346	-0.754302	-0.254637	-0.0448193	0.320173	15	-16.0326	-32.7902	0	C1542
1544	1.25432	0.147674	-0.939316	-0.17434	0.601354	-0.21898	0.336246	0.38189	-0.117733	-0.810474	-0.197349	-0.2236	0.349395	34	5.35149	-37.7581	0	C1543
1545	0.678683	0.88327	-0.756329	-0.0750103	1.44932	-0.603678	0.419519	0.431738	-0.120629	-0.66017	0.0524052	-0.804443	-0.385423	20	8.07968	23.0543	0	C1544
1546	1.36814	0.0714643	-0.694372	0.132736	0.387859	-0.254266	0.0856541	0.571532	-0.102654	-0.761571	-0.278708	-0.507364	0.304966	15	-8.53545	-38.1156	0	C1545
1547	0.994981	0.433323	-0.223594	-0.0907976	0.856545	-0.769447	0.264253	0.120131	-0.243627	-0.739111	0.118844	-0.46834	0.0455742	26	1.95693	-5.94926	0	C1546
1548	1.64236	0.125347	-0.756219	0.213289	0.532959	-0.238792	-0.0011256	0.366932	-0.307776	-1.03433	-0.181314	-0.570907	0.701098	11	-3.94053	-55.6375	0	C1547
1549	0.661723	0.996321	-0.837588	-0.347705	1.55989	-0.696368	0.669354	0.284856	0.239057	-0.619234	-0.554184	-0.470982	-0.316515	19	26.2543	22.1005	0	C1548
1550	1.76419	-0.122083	-0.710265	0.208184	0.365155	-0.271201	0.117924	0.0477223	-0.125119	-0.971542	-0.30248	-0.289747	0.706851	11	-3.99015	-53.1316	0	C1549
1551	1.19173	-0.0561583	0.0390918	-0.168232	0.260593	-0.332718	0.0718163	0.285295	-0.0830303	-0.607428	-0.360839	-0.393694	0.33242	31	-17.448	-12.2208	0	C1550
1552	0.794799	0.271693	-0.380118	0.0407138	0.701848	-0.559869	0.14097	0.5707	-0.452432	-0.522465	0.461572	-0.604204	-0.199393	21	-26.2283	6.32348	0	C1551
1553	-0.723937	-0.604553	1.19127	-0.436985	-1.30619	1.459	-1.24391	-1.93353	-0.363336	2.19958	3.06867	0.95201	0.151194	32	-41.6832	61.3728	0	C1552
1554	0.00335862	1.29738	-0.349896	-0.320845	1.87574	-0.713344	0.910707	0.160117	0.153783	-0.572705	-0.557969	-0.62282	-0.643322	20	17.537	35.7871	0	C1553
1555	0.71604	0.40629	-0.647201	-0.421171	0.963428	-0.677569	0.537603	1.03065	0.109348	-0.77271	-0.502336	-0.317582	0.015756	12	5.54717	13.1048	0	C1554
1556	1.42984	0.336693	-0.679948	0.451751	0.729	-0.370677	0.241491	0.342118	-0.095078	-1.07242	-0.649242	-0.556449	0.381623	11	13.3876	-50.7985	0	C1555
1557	1.20123	0.0589169	-0.563677	-0.154521	0.446873	-0.36774	0.193054	0.562585	-0.33657	-0.799208	0.209456	-0.392361	0.208402	37	-25.0407	-16.1692	0	C1556
1558	0.527367	-0.830077	-0.0478501	0.630718	-1.23444	-0.0128104	0.262019	-0.461181	0.172911	0.343851	0.497821	0.490959	0.13963	14	56.3572	38.0841	0	C1557
1559	0.997972	0.268835	-0.618706	-0.222403	0.945685	-0.717262	0.602216	0.110711	0.0985132	-0.782285	-0.305461	-0.213832	0.196124	26	12.9257	-6.74004	0	C1558
1560	-1.1701	0.217766	-0.172191	0.390431	0.703495	0.519624	-0.150038	-1.24995	-0.647119	1.10977	2.1177	0.0352155	-0.90414	1	5.12916	64.3039	0	C1559
1561	-1.26225	-0.829949	-0.443335	0.109285	-1.50083	0.37768	0.451381	1.20276	0.587133	0.780028	1.26058	0.722665	-0.232031	22	48.0928	18.6719	0	C1560
1562	-1.45907	-0.459581	0.615806	0.689802	-0.712601	0.211742	0.384652	1.44298	0.207805	0.92143	-0.830268	0.579673	-0.665198	8	58.0135	-9.72189	0	C1561
1563	-0.554906	0.498225	-0.32302	-0.304233	0.862576	0.349855	0.0125084	-1.55697	-0.482979	0.961671	1.98703	0.0635193	-0.772174	7	8.84391	67.1822	0	C1562
1564	-0.991327	-0.67045	0.310676	0.548327	-0.9045	0.470496	0.610828	-0.608016	0.496197	0.858834	-0.954504	0.945127	0.659081	25	82.917	18.045	1	C1563
1565	-1.01619	1.04519	-0.138503	-0.129504	1.4626	0.116255	0.555038	-1.69816	-0.0314189	0.675313	1.03189	-0.155632	-0.949123	7	12.1285	82.4552	0	C1564
1566	1.62592	-0.181879	-0.637222	0.26156	0.115403	-0.189939	0.0530951	0.0723241	-0.0264397	-0.927826	-0.270658	-0.267043	0.719355	27	-14.5789	-69.4398	0	C1565
1567	1.27378	0.0774963	-0.343298	-0.0550635	0.635511	-0.432061	0.282739	0.637209	-0.178651	-0.93226	-0.250262	-0.526446	0.1463	26	3.11853	-25.2828	0	C1566
1568	1.31619	-0.233496	-0.577934	0.0116214	0.246175	-0.35211	0.193191	0.391664	0.0136546	-1.03975	0.315356	-0.306043	0.355987	15	-22.6328	-28.1907	0	C1567
1569	1.07674	0.0787535	-0.480992	-0.235823	0.588198	-0.483038	0.378805	0.54962	-0.0784064	-0.926124	-0.281456	-0.122775	0.219459	31	-11.941	-13.434	0	C1568
1570	1.74549	-0.204884	-0.53901	0.164657	0.236132	-0.228112	0.00549122	0.54185	-0.381329	-0.73435	-0.325548	-0.507394	0.61404	27	-15.0419	-63.1099	0	C1569
1571	0.848869	0.151346	-0.670995	-0.359499	0.739237	-0.746462	0.297486	0.639266	-0.0970953	-0.689152	0.323871	-0.178213	0.0546756	31	-16.4055	1.70975	0	C1570
1572	1.40582	-0.139319	-0.467068	0.295096	0.0751485	-0.5286	0.0128129	0.870168	-0.248329	-0.787917	-0.123554	-0.340253	0.30621	28	-30.5037	-48.7421	0	C1571
1573	0.399365	0.999721	-0.576137	-0.412079	1.446	-0.59709	0.635015	0.175846	0.276388	-0.668117	-0.454387	-0.42874	-0.339207	19	23.6126	22.9554	0	C1572
1574	1.88525	-0.442466	-0.644669	0.500747	0.0593407	-0.0507835	0.00323416	0.0543434	-0.486235	-0.830746	0.224042	-0.547461	0.729709	28	-30.4555	-63.5624	0	C1573
1575	0.908396	0.558815	-0.588636	-0.258945	1.14872	-0.524874	0.390915	0.0774135	-0.195907	-0.730163	0.329649	-0.5883	-0.163044	19	15.8344	7.54886	0	C1574
1576	1.0897	0.171098	-0.373136	0.456866	0.642477	-0.567439	0.195388	0.277224	-0.053958	-0.994621	-0.097598	-0.474455	0.0267127	15	-0.67332	-25.2904	0	C1575
1577	1.39124	0.292701	-0.625611	-0.100151	0.616384	-0.436578	0.147828	0.601567	-0.0886406	-0.922468	-0.359214	-0.521009	0.403597	34	4.53411	-41.6069	0	C1576
1578	-1.3297	-0.207121	1.58171	-0.452941	0.329064	-0.572893	0.224841	3.08257	0.615866	-0.217872	-1.04646	-0.317081	-0.441582	13	51.061	-43.3822	0	C1577
1579	1.50388	0.114234	-0.576612	0.218426	0.547324	-0.163911	0.0400065	0.355616	-0.247468	-0.961005	-0.369938	-0.5637	0.463205	11	-2.50162	-55.541	0	C1578
1580	0.930528	0.807874	-0.885161	-0.226682	1.34066	-0.507203	0.584183	0.0380918	0.00930556	-0.807781	-0.196767	-0.602216	0.0195841	19	23.586	8.25674	0	C1579
1581	1.93368	-0.311157	-0.673219	0.380363	0.145912	0.0342679	-0.41616	0.464544	-0.662283	-0.797496	0.390641	-0.794121	0.85915	28	-36.5728	-59.8351	0	C1580
1582	1.10278	-0.200222	-0.246772	0.179711	0.276913	-0.449318	0.0297501	0.714978	-0.243115	-0.601386	-0.0564728	-0.464181	0.175381	37	-37.9941	-17.4804	0	C1581
1583	0.610873	0.340854	-0.45453	-0.435899	0.799068	-0.566077	0.261683	0.799436	0.0322344	-0.495574	-0.152935	-0.368062	-0.114377	31	-11.1352	4.90182	0	C1582
1584	0.75628	0.986283	-0.662815	-0.0625741	1.41613	-0.550927	0.518957	0.0750566	-0.0477659	-0.804229	-0.339676	-0.660364	-0.147741	19	29.1846	10.4894	0	C1583
1585	1.9871	-0.818531	-0.280685	0.537948	-0.512863	-0.0778349	-0.0760119	0.812892	-0.465763	-1.01673	-0.0727672	-0.28879	0.886001	28	-42.653	-63.0511	0	C1584
1586	-1.10486	-0.0594738	1.55312	0.570135	-0.972208	0.298009	-0.633499	0.373036	0.0814363	0.88856	-0.480201	0.348528	-0.0436551	3	-51.4884	5.78757	0	C1585
1587	0.0528815	0.189634	-0.138539	-0.49804	-0.804702	2.38703	-0.820196	-1.79938	-0.685405	2.39847	-0.336408	0.975633	0.732819	36	-55.9609	44.3693	0	C1586
1588	-0.567659	0.1651	0.530509	-0.920222	-0.999516	1.71896	-1.15191	-1.6245	0.537391	1.32173	1.92859	0.273481	0.134748	5	-43.7291	28.8866	0	C1587
1589	-1.20002	-0.435362	0.796847	0.141618	-0.880196	0.251456	0.488228	1.94494	0.250917	0.22057	-1.02912	0.736723	-0.406434	8	48.6512	-11.6452	0	C1588
1590	-1.13209	0.332247	0.122376	-0.74515	0.926659	0.444276	-0.0896415	-1.53455	-0.492139	1.04238	2.94342	0.026246	-0.672138	10	28.3332	63.7113	0	C1589
1591	0.899067	0.227387	-0.999884	-0.281271	0.897736	-0.60208	0.46165	0.362098	0.212889	-0.694046	-0.202677	-0.0623107	0.213674	26	10.5062	-4.68502	0	C1590
1592	1.35185	0.273596	-0.680453	0.0488065	0.752226	-0.493625	0.285372	0.157254	-0.168884	-0.903747	-0.366045	-0.277214	0.388743	34	11.0355	-34.4561	0	C1591
1593	-0.85603	-0.802119	0.327505	0.156984	-0.970564	0.724039	0.299993	0.0364273	0.50806	0.768425	-1.01381	0.747443	0.780799	25	86.8587	5.0491	0	C1592
1594	-0.817914	-0.612943	0.140843	-0.415682	-1.28381	1.41484	-1.21259	-0.0792728	-0.482817	2.11609	1.67791	0.911371	0.0405092	32	-28.202	62.2629	0	C1593
1595	1.13491	-0.268586	-0.963218	-0.117143	-0.00882438	1.4205	-0.215145	-1.3374	-0.35709	-0.670475	-0.934803	0.445528	2.8603	16	91.1142	-12.8883	0	C1594
1596	-0.553063	-0.386105	0.553737	-0.72647	-1.41291	1.79136	-1.39149	-1.73539	-0.195749	1.92304	3.32926	0.745036	0.303314	30	-31.6187	39.4309	0	C1595
1597	0.930435	0.284317	-0.517983	-0.155476	0.751249	-0.580893	0.311278	0.635795	-0.342315	-0.748145	0.201991	-0.54906	0.0853606	21	-26.49	3.58948	0	C1596
1598	1.88366	-0.202067	-0.869939	0.261768	0.186874	0.0378243	-0.00680375	0.498282	-0.450685	-0.725815	-0.33887	-0.482922	0.694753	27	-23.4643	-70.9585	0	C1597
1599	1.10164	0.499038	-0.508922	-0.0456512	1.12428	-0.485057	0.223366	0.131078	-0.0866408	-0.826592	-0.0759248	-0.739488	0.0580833	24	24.3016	-17.7209	0	C1598
1600	-1.06724	0.421853	-0.419033	0.629148	1.01079	0.0635341	0.180286	-1.21939	-0.312099	0.763685	1.65061	-0.190708	-0.823709	1	-2.63743	70.6213	0	C1599
1601	-1.16915	-0.413438	2.75063	-0.239054	-0.0944668	-0.385472	-0.290105	0.230116	1.31013	-0.377602	-0.799524	0.581296	-0.0783814	35	17.9354	-74.0848	0	C1600
1602	-0.857724	1.06088	-0.139021	-0.680373	1.52925	0.119138	0.47934	-1.54522	0.273968	0.596456	0.921589	-0.087436	-0.929751	7	15.3944	82.6616	0	C1601
1603	1.88049	-0.62927	-0.530759	0.111004	-0.127306	0.102138	-0.14441	1.12034	-0.826409	-0.64903	-0.0856007	-0.678588	1.10584	28	-40.7025	-63.1592	0	C1602
1604	0.27578	0.56958	-0.605772	-0.462345	1.04364	-0.468863	0.349539	0.695788	0.11871	-0.502215	-0.0196923	-0.295131	-0.405042	9	-9.09218	18.6537	0	C1603
1605	1.19087	-0.0513989	-0.910649	-0.100512	0.488307	-0.336311	0.197829	0.312721	-0.0513773	-0.716115	0.204481	-0.255866	0.35777	15	-20.5981	-29.4612	0	C1604
1606	1.72572	0.116206	-0.731902	0.254856	0.663846	-0.18142	-0.0786946	0.192839	-0.382003	-0.896811	0.0293964	-0.82314	0.587989	27	-22.0524	-55.7676	0	C1605
1607	1.76737	-0.0514044	-0.442831	0.8011	0.34672	-0.17517	-0.17174	0.352353	-0.355306	-0.929257	-0.48811	-0.761696	0.606519	27	-18.8049	-60.3335	0	C1606
1608	-0.913029	-0.902146	0.711209	-0.695972	-1.35132	1.25643	-1.0263	-0.591911	-0.65476	1.96675	3.49958	0.805039	-0.203786	32	-37.6046	67.9724	0	C1607
1609	-1.01979	0.768812	0.00431824	-0.0721247	1.14045	0.33954	0.323524	-1.94066	-0.406685	1.01049	1.26663	0.0793494	-0.613107	1	7.64888	74.973	0	C1608
1610	-0.838498	-0.104	1.15942	0.122494	-1.18844	1.02063	-0.997777	0.435954	-0.314664	1.66011	-0.904959	0.678716	0.324237	17	-76.8899	-27.0327	0	C1609
1611	0.9932	0.329741	-0.445018	0.118384	0.884075	-0.59064	0.472496	0.0235479	-0.046195	-0.842693	-0.315915	-0.393527	0.11201	24	18.5281	-20.0827	0	C1610
1612	-0.931218	0.594941	-0.448854	-1.0211	1.10569	0.464355	0.306918	-1.84087	-0.396821	1.07006	2.91393	0.0715539	-0.526713	10	24.4041	63.4104	0	C1611
1613	1.67709	-0.0699378	-0.644531	0.391244	0.481381	-0.128852	0.146762	0.287032	-0.100069	-1.01241	-0.732886	-0.39185	0.55629	27	-5.45717	-65.6141	0	C1612
1614	1.46886	-0.38812	-0.524781	0.198979	0.136115	-0.279075	-0.0422025	0.507429	-0.368234	-0.8831	0.357981	-0.349616	0.505217	18	-39.6516	-38.3591	0	C1613
1615	0.878641	0.079561	-0.437737	-0.409053	0.729295	-0.531797	0.287077	0.501109	-0.113345	-0.665672	0.211952	-0.31875	0.0420453	21	-16.9544	2.07034	0	C1614
1616	0.18377	0.731395	-0.738713	-0.531932	1.25495	-0.6986	0.559877	0.470968	0.119759	-0.471726	0.451803	-0.202187	-0.684031	9	-6.78833	29.8935	0	C1615
1617	1.30198	-0.204863	-0.623418	-0.20745	0.303943	-0.3146	0.247845	0.462527	-0.242091	-0.69535	0.248823	-0.304961	0.309087	18	-30.6297	-32.1936	0	C1616
1618	1.33197	0.322014	-0.812463	-0.0761591	0.679721	-0.35127	0.176876	0.353965	-0.255552	-0.886285	0.24883	-0.70237	0.38685	15	-6.71295	-26.7138	0	C1617
1619	-1.3845	-0.306219	3.6765	-0.264653	-0.314924	-0.744613	-0.0307157	-0.525382	1.59975	-0.814131	-0.838352	0.920512	0.470705	35	8.40779	-86.738	0	C1618
1620	1.32877	0.215817	-0.875803	0.0352679	0.658054	-0.316684	0.179036	0.248222	-0.149699	-0.85933	0.224682	-0.686739	0.41843	15	-6.68992	-26.6246	0	C1619
1621	0.416492	0.730232	-0.444746	-0.397223	1.31291	-0.661946	0.616145	-0.145799	0.326256	-0.740715	0.101552	-0.351932	-0.384858	19	16.0512	23.1402	0	C1620
1622	1.07641	-0.307941	-0.308708	0.180667	0.0804767	-0.560564	0.1787	0.704447	-0.244272	-0.833802	0.212243	-0.197966	0.277053	18	-38.384	-36.0892	0	C1621
1623	-1.13916	0.565364	-0.0683646	0.743659	1.03775	0.436493	0.204038	-1.89161	-0.387007	0.910232	1.07186	0.0558152	-0.670914	1	-0.167869	80.7234	0	C1622
1624	-0.198957	-0.0384328	0.390386	-0.524834	-0.971774	2.2513	-1.24111	-1.82695	-0.685441	2.26212	1.504	0.747421	0.291099	30	-41.8468	46.9717	0	C1623
1625	-1.17102	-0.411575	0.457881	0.798567	-1.01152	-0.0912625	0.580579	1.77918	0.291257	0.600689	-1.08952	0.566351	-0.320789	8	56.1093	-11.3887	0	C1624
1626	-0.565645	-0.0216708	0.611607	-0.620155	-1.03485	1.67884	-0.964665	-1.53175	0.616251	1.66247	0.645367	0.509095	0.158516	5	-53.379	27.5404	0	C1625
1627	-0.95561	1.12838	-0.893377	-0.491537	1.51528	0.292343	0.553539	-1.67565	0.0260112	0.891287	1.46274	0.0519937	-0.902649	7	13.6984	79.845	0	C1626
1628	0.399764	0.204559	-0.655545	-0.136709	0.737741	-0.656898	0.467264	0.772731	0.316117	-0.682643	-0.143876	-0.0684785	-0.267252	12	-10.9519	7.96929	0	C1627
1629	0.857494	0.376322	-0.741325	0.15819	0.914931	-0.618905	0.17609	0.531202	-0.08577	-0.706033	-0.0170667	-0.483175	-0.023045	26	3.77979	-17.0801	0	C1628
1630	-0.626708	-0.570619	0.700255	-0.170554	-1.29358	1.17924	-1.19267	-0.918208	-0.783709	2.21811	2.24903	1.01543	-0.0365726	32	-35.3151	60.1131	0	C1629
1631	1.06121	0.524444	-0.730544	-0.0524544	0.961959	-0.437655	0.466083	0.166283	-0.0522098	-0.770239	-0.36047	-0.420157	0.0238439	24	28.3226	-16.8221	0	C1630
1632	-1.28185	-0.110512	2.42112	-0.272404	-0.456121	-0.19249	-0.379251	0.709495	1.1845	0.173245	-1.10689	0.280662	-0.0482263	23	24.8474	-69.4445	0	C1631
1633	-1.38337	-0.850258	0.528119	0.923679	-1.12598	0.32323	0.115745	0.557931	0.268493	0.619214	0.246704	0.569963	-0.0315036	22	54.2812	21.2098	0	C1632
1634	0.676693	0.496942	-0.0632303	-0.402246	0.954998	-0.759063	0.414235	0.0922986	-0.111549	-0.659102	0.231163	-0.377756	-0.207431	9	-1.57919	22.9071	0	C1633
1635	0.798428	0.935971	-0.620192	0.0340191	1.33167	-0.619392	0.540139	0.0136061	-0.0461995	-0.85659	-0.11958	-0.778792	-0.15416	19	29.1418	10.1697	0	C1634
1636	-0.0966657	0.680112	0.187249	-0.763337	-0.723029	2.24434	-1.11652	-1.55369	1.12031	1.92136	-1.44664	0.6129	0.573601	6	-64.3141	20.0601	0	C1635
1637	0.784219	0.715762	-0.828752	-0.401141	1.11319	-0.608551	0.418211	0.0888176	0.0129878	-0.566807	0.0504859	-0.368296	-0.0220846	19	15.5628	10.5952	0	C1636
1638	1.36744	-0.318263	-0.642682	0.108142	0.241653	-0.416641	0.131977	0.971197	-0.481676	-0.723813	0.0887226	-0.384676	0.441954	18	-41.2067	-21.4492	0	C1637
1639	1.07127	0.480439	-0.853514	-0.173721	1.08243	-0.502414	0.300547	0.504941	-0.0192902	-0.805835	-0.208019	-0.594831	0.18427	24	25.6971	-13.93	0	C1638
1640	-1.03905	0.574726	-0.252889	0.293136	1.23356	0.538342	0.224078	-2.21033	-0.402721	1.07509	1.7727	0.260845	-0.788047	1	3.37287	75.1338	0	C1639
1641	0.610888	-0.0131307	-0.736463	-0.363646	0.678921	-0.513555	0.567597	0.468917	0.211054	-0.470299	-0.144745	0.1517	-0.181508	21	-13.2023	6.9565	0	C1640
1642	0.865224	0.746745	-0.509641	0.523681	1.14374	-0.706317	0.372941	-0.225485	0.0123793	-0.886705	-0.449495	-0.494408	0.00130913	24	28.133	-20.7078	0	C1641
1643	-1.06097	0.53086	-0.16196	-0.66419	0.866878	0.596482	0.133612	-2.11482	-0.262166	1.24815	2.45957	0.288615	-0.506084	10	24.1976	65.5258	0	C1642
1644	1.53623	0.311675	-0.6722	0.116766	0.786208	-0.300039	0.282509	-0.0409784	-0.1738	-0.975168	-0.389168	-0.434358	0.353708	11	4.40752	-50.9745	0	C1643
1645	-1.05517	0.467466	-0.238896	-0.54755	0.917221	0.458811	0.102349	-1.11155	-0.492164	1.00641	1.99126	-0.0324993	-0.749879	7	10.2269	67.174	0	C1644
1646	-0.949694	-0.691192	0.647084	0.241057	-0.82092	0.524911	0.245825	-0.873935	0.696829	1.10886	-0.772823	0.927541	0.489206	25	89.9848	16.4421	0	C1645
1647	1.06225	-0.0624801	-0.523504	-0.210124	0.357492	-0.539356	0.232739	0.524524	-0.000707	-0.832574	0.242123	-0.1967	0.196908	37	-32.3437	-11.1678	0	C1646
1648	-0.983954	-0.400642	1.55161	0.100988	-0.708386	0.879883	-0.718359	0.343859	0.0576542	1.39915	-1.03094	0.250202	0.051693	17	-75.9123	-22.5673	0	C1647
1649	1.0893	-0.0166682	-0.48688	-0.120309	0.203836	-0.444869	0.195254	0.401858	-0.156425	-0.802593	0.347111	-0.14404	0.147057	37	-32.1713	-11.4994	0	C1648
1650	-0.858917	0.944242	-0.560392	-0.544203	1.25707	0.311231	0.461647	-1.16994	-0.123616	0.832666	0.809595	0.0495019	-0.799554	7	11.7888	79.9934	0	C1649
1651	-0.315214	0.389379	0.357604	-0.858739	-0.798399	2.10811	-1.01502	-1.28832	1.04309	1.83898	-1.16675	0.669156	0.382743	6	-62.0581	22.1037	0	C1650
1652	-1.23771	-0.0462095	2.33703	-0.28571	0.0579715	-0.557136	-0.0491106	1.14063	1.06817	-0.585457	-0.721714	0.269331	-0.408226	23	20.7453	-66.137	0	C1651
1653	0.767429	0.261992	-0.556025	-0.172785	0.827861	-0.565166	0.305557	0.221139	0.00778436	-0.825383	0.202918	-0.326996	0.112737	12	-1.93945	-1.05762	0	C1652
1654	-1.36221	-0.15183	0.626331	0.309059	-0.783439	-0.217689	0.856549	0.981681	1.00477	-0.127458	-1.23833	0.833685	0.203363	13	56.4142	-19.8244	0	C1653
1655	-0.797305	0.482353	0.266558	0.795989	0.799449	0.153409	0.0384134	-1.24782	-0.537999	0.628739	0.949527	-0.238115	-0.821362	1	-6.06213	72.0152	0	C1654
1656	0.104724	0.812671	-0.486106	-0.466328	1.40795	-0.716754	0.697165	0.207458	0.278801	-0.583121	-0.155859	-0.305916	-0.393302	20	9.19192	32.337	0	C1655
1657	0.559282	0.601405	-0.424787	0.0644827	0.8579	-0.631263	0.389723	0.107953	0.00737298	-0.641165	-0.0821044	-0.27222	-0.300639	12	2.47191	7.09342	0	C1656
1658	1.16108	-0.155338	-0.763823	0.184151	0.206617	-0.506072	0.421469	0.352925	0.0189527	-0.844128	-0.142291	-0.0355024	0.423572	15	-17.8237	-29.9723	0	C1657
1659	0.713121	0.55622	-0.720281	-0.275142	1.01648	-0.668078	0.460178	0.481778	-0.0376397	-0.683086	-0.0976032	-0.349834	-0.0382755	12	6.89952	8.14806	0	C1658
1660	0.702078	0.5216	-0.868119	-0.362508	1.03905	-0.573498	0.356682	0.443063	0.0748994	-0.551323	0.22353	-0.407716	-0.210967	12	-1.35893	16.0903	0	C1659
1661	0.518026	0.961583	-0.627767	-0.269186	1.26667	-0.343584	0.361809	-0.557888	-0.048127	-0.455068	0.47734	-0.715234	-0.211884	19	18.3908	7.38193	0	C1660
1662	-0.915518	-0.541645	0.767722	1.06147	-0.827437	0.188225	0.366776	-0.133579	0.147282	0.758101	-1.22263	0.666941	0.44513	38	76.2461	3.1119	0	C1661
1663	-0.79416	-0.84966	0.42396	-0.727775	-1.60254	1.50623	-1.20569	-0.243646	-0.550729	2.20542	2.95614	0.948787	-0.0998791	32	-33.5515	65.5556	0	C1662
1664	-0.723926	0.395221	-0.427067	-0.156067	0.705252	0.365183	-0.196948	0.172065	-0.631249	0.879373	0.99613	-0.125469	-0.904322	4	-6.82308	57.8484	0	C1663
1665	-0.86788	0.2061	-0.128001	-0.330322	0.501905	0.431719	-0.161042	-0.525872	-0.67336	1.13834	1.33825	0.0398434	-0.549318	1	1.29689	62.0868	0	C1664
1666	-1.04897	-0.290756	2.75634	-0.334357	-0.0903253	-0.517396	-0.0428333	0.0921867	1.23512	-0.267993	-0.906409	0.310585	0.0548759	35	16.9456	-73.5705	0	C1665
1667	1.48361	0.258667	-0.742653	-0.0495104	0.757139	-0.227206	0.0387888	0.613024	-0.357164	-0.903296	-0.0976132	-0.613974	0.281377	11	3.8817	-43.7958	0	C1666
1668	1.00874	0.0864044	-0.312122	-0.0510809	0.685715	-0.521231	0.138382	0.200514	0.0575039	-0.771008	-0.168385	-0.266328	0.132169	31	-12.3829	-15.0148	0	C1667
1669	0.666287	0.388771	-0.73305	-0.42416	0.966648	-0.662451	0.517493	0.428042	0.143158	-0.656048	0.249708	-0.322026	-0.212759	9	-6.87105	18.1037	0	C1668
1670	1.09433	0.181006	-0.655687	-0.358603	0.708488	-0.557674	0.26756	0.687726	-0.0439852	-0.720467	-0.00981676	-0.324046	0.0598843	31	-9.09567	-7.57224	0	C1669
1671	-0.284724	0.343347	-0.49627	-0.14765	0.60359	0.125038	-0.218426	0.358428	-0.506566	0.676874	0.773984	-0.363941	-0.622997	4	-9.38649	56.743	0	C1670
1672	1.27808	0.195554	-0.592734	-0.126007	0.676649	-0.355102	0.377463	0.307964	0.0756578	-0.822614	-0.634779	-0.279116	0.22461	34	6.74541	-30.791	0	C1671
1673	1.19329	0.238268	-0.79018	0.129435	0.695874	-0.440304	0.197494	0.27508	-0.104618	-0.794455	-0.38669	-0.192241	0.32813	34	10.4999	-33.8536	0	C1672
1674	1.40726	-0.0478797	-0.72628	-0.0759942	0.119233	-0.304605	0.28968	0.318154	-0.00974175	-0.769775	-0.0248312	-0.246084	0.37137	15	-19.3931	-31.3289	0	C1673
1675	1.64487	-0.284786	-0.319752	-0.0812188	0.065437	-0.238316	-0.0100924	0.497639	-0.294276	-0.893825	0.00459857	-0.373795	0.625844	18	-40.7076	-42.4014	0	C1674
1676	1.16426	0.471926	-0.601043	-0.222997	0.838854	-0.565581	0.330633	0.35013	0.0102733	-0.82383	-0.287645	-0.452528	0.14857	26	9.89357	-14.4479	0	C1675
1677	0.301063	0.330288	-0.21969	-0.576811	-0.92281	2.74252	-0.939698	-2.04026	-0.336436	2.84523	-1.09332	1.3971	0.851494	36	-62.9714	46.5443	0	C1676
1678	1.08489	0.342487	-0.608759	-0.246247	0.895366	-0.416424	0.46716	-0.0617677	-0.308751	-0.581427	-0.0604103	-0.466493	0.270645	26	5.31234	-8.20795	0	C1677
1679	-1.07926	-0.354086	2.74907	-0.069603	-0.145457	-0.523934	-0.109932	-0.159851	1.38953	-0.464967	-0.773791	0.414161	0.111989	35	14.9512	-75.0011	0	C1678
1680	-0.835754	0.465409	0.0618771	-0.798735	0.927895	0.589316	0.0663299	-2.02939	-0.429354	1.16884	2.45397	0.0825126	-0.551377	10	23.6868	65.2893	0	C1679
1681	1.1407	0.107209	-0.402087	-0.206516	0.70575	-0.460144	0.394438	0.591586	-0.00714611	-0.822796	-0.548121	-0.271234	0.107601	34	6.41031	-29.1683	0	C1680
1682	1.16013	0.223956	-0.646471	-0.127427	0.612332	-0.396441	0.166931	0.867578	-0.224453	-0.819416	-0.0997884	-0.584823	0.206588	26	1.36548	-22.2131	0	C1681
1683	1.42621	-0.291655	-0.515566	0.206821	0.212556	-0.419156	-0.0467642	0.513245	-0.265466	-0.772099	0.114888	-0.313604	0.444075	18	-38.9213	-37.5208	0	C1682
1684	0.421545	0.314621	-0.691015	-0.103924	0.881536	-0.751782	0.419447	0.692853	0.0927001	-0.70545	0.0963182	-0.179971	-0.17812	12	-9.59318	9.32239	0	C1683
1685	1.4884	0.0994536	-0.325003	-0.146506	0.547829	-0.36076	0.251584	0.270144	-0.358169	-0.573744	-0.358823	-0.448524	0.201927	15	-4.9779	-33.9555	0	C1684
1686	-0.67405	0.0451744	-0.0914626	0.883612	0.186373	0.236558	-0.455111	-0.11154	-0.759032	0.715563	1.28589	-0.153724	-0.75087	4	-13.4838	53.8175	0	C1685
1687	-0.59103	0.756114	-0.591621	-0.477592	1.0849	0.354837	0.0833814	-0.96647	-0.55508	0.940378	1.32738	-0.0652226	-0.773726	7	10.5461	70.6339	0	C1686
1688	1.89164	-0.464353	-0.538248	0.226707	-0.0493133	-0.173003	0.010925	0.718243	-0.237763	-0.789958	-0.386624	-0.482136	0.738655	27	-24.7333	-69.097	0	C1687
1689	-0.886173	0.952535	-0.385537	-0.616471	1.34444	0.459368	0.437465	-1.3643	-0.223162	1.11082	0.771674	0.0770073	-0.903023	7	13.8118	77.5691	0	C1688
1690	-0.28612	0.00139583	0.49625	-0.654408	-0.910691	2.02088	-0.735374	-1.36488	0.971901	2.01669	-1.36549	0.788845	0.472641	6	-63.5109	22.0072	0	C1689
1691	0.295831	0.450456	-0.725146	0.161349	0.914935	-0.541383	0.429592	0.431887	0.0589511	-0.830609	0.0456151	-0.346969	-0.051597	12	-1.49659	9.2363	0	C1690
1692	0.871156	-0.181075	-0.500444	-0.589213	0.358054	-0.186602	0.183578	0.34483	-0.188449	-0.504436	0.612908	-0.157874	0.160893	37	-30.3374	-7.63401	0	C1691
1693	0.949131	0.173979	-0.385394	-0.281734	0.722746	-0.396538	0.133866	0.806157	-0.352402	-0.586742	-0.137603	-0.499715	0.125558	31	-12.8525	-6.00746	0	C1692
1694	0.857805	0.384818	-0.461577	0.0670685	0.831067	-0.613772	0.270633	0.55792	-0.176949	-0.701256	-0.403949	-0.437203	0.11927	26	13.4293	-17.6417	0	C1693
1695	-0.338406	0.312125	0.162916	-0.833515	-1.10576	1.95502	-1.21021	-1.35293	0.103286	1.56471	1.40489	0.279337	0.30093	5	-47.2857	26.9778	0	C1694
1696	1.01462	0.172874	-0.961156	0.220457	0.682114	-0.441702	0.314233	0.324551	0.068541	-0.859319	-0.00817358	-0.363452	0.216042	15	-6.52384	-18.6396	0	C1695
1697	1.15577	-0.033926	-0.617102	-0.190233	0.519513	-0.5197	0.317845	0.435599	-0.12498	-0.634638	0.199512	-0.192371	-0.0422097	37	-21.1859	-11.523	0	C1696
1698	0.162914	0.396585	0.242203	-0.635712	-0.763387	2.62274	-1.07034	-1.64906	-0.613463	2.47526	-1.20254	1.0602	0.801934	36	-62.1253	41.308	0	C1697
1699	1.45629	0.252493	-0.440733	0.133007	0.948156	-0.379884	0.234001	0.237439	-0.158684	-1.00195	-0.240791	-0.855967	0.281861	11	10.335	-47.0916	0	C1698
1700	1.00354	0.274005	-0.795589	-0.166745	1.0635	-0.423175	0.440851	0.184913	0.109783	-0.67995	-0.311509	-0.419115	0.0886926	26	11.0242	-14.1167	0	C1699
1701	2.00197	-0.303353	-0.257976	0.743175	-0.0588749	-0.0615069	-0.308691	0.802925	-0.602031	-0.976055	-0.541253	-0.710676	0.878093	28	-33.1708	-69.5223	0	C1700
1702	-0.35147	0.225124	0.745909	-0.757304	-1.19187	2.05613	-1.33324	-2.21686	-0.236792	1.73889	2.49474	0.640468	0.461709	30	-37.4536	43.5435	0	C1701
1703	0.188057	0.99499	-0.770021	-0.105513	1.41036	-0.497051	0.487954	0.454403	-0.137899	-0.324644	0.182712	-0.83134	-0.601965	4	-1.85452	42.1788	0	C1702
1704	-0.0639627	0.103174	0.675214	-0.740854	-1.08658	2.08347	-1.08122	-1.85127	0.931777	1.71854	-1.41756	0.810207	1.86746	6	-71.9497	27.5439	0	C1703
1705	0.990943	0.329488	-0.284512	-0.471197	0.752643	-0.663004	0.315333	0.245587	0.137842	-0.746343	-0.0542774	-0.300846	0.0317089	31	-10.1599	-3.29855	0	C1704
1706	-0.285625	-0.0485289	0.753251	-0.778662	-1.27659	2.09291	-1.27053	-1.86157	-0.370232	2.20675	1.37665	0.920353	0.382753	30	-40.9357	47.3474	0	C1705
1707	1.90086	-0.371372	-0.481847	0.066695	-0.153201	-0.021163	-0.573538	0.79064	-0.81538	-0.508555	0.739614	-0.690056	0.698175	28	-40.376	-58.9005	0	C1706
1708	-0.5587	-0.583417	0.412314	-0.52697	-1.17481	1.71694	-1.13773	-1.58256	-0.644943	2.54042	2.20142	1.07943	0.122458	32	-38.4629	57.327	0	C1707
1709	1.71012	-0.307783	-0.357222	0.0226903	0.0725669	-0.195469	-0.0976321	0.653427	-0.202443	-0.875805	-0.181358	-0.489961	0.630228	27	-24.9573	-67.982	0	C1708
1710	-0.85001	-0.809754	0.688715	0.645876	-0.876519	-0.4238	0.513747	0.084377	0.550441	0.157559	0.454908	0.546857	-0.208053	14	56.9869	27.7242	0	C1709
1711	-0.2416	0.056296	0.323597	-0.478141	-1.09394	2.19367	-1.37144	-1.55583	-0.364264	2.46779	-0.0692287	1.17749	0.618691	36	-52.061	42.577	0	C1710
1712	0.88148	0.129801	-0.526208	-0.319143	0.644308	-0.667533	0.246338	0.196549	-0.00428496	-0.50487	0.231461	-0.299843	0.232524	31	-16.9437	-3.97176	0	C1711
1713	1.23476	0.20218	-0.790262	-0.157817	0.700105	-0.437585	0.207131	0.643859	-0.0296007	-0.765632	-0.28686	-0.44324	0.297712	34	9.80796	-25.2353	0	C1712
1714	-0.712402	-0.750449	0.963443	-0.375536	-1.47659	1.44965	-0.902088	-1.50124	-0.747451	2.29128	2.86404	1.07532	-0.0939283	32	-39.5997	61.3386	0	C1713
1715	-0.771392	0.397284	-0.370324	0.136048	1.01755	0.127933	0.100639	-0.248676	-0.354744	0.596283	0.958058	-0.406658	-0.839013	4	-5.12928	62.7528	0	C1714
1716	1.58131	0.178804	-0.533464	-0.167517	0.623567	-0.264585	-0.0545037	0.268879	-0.425597	-0.696218	0.144383	-0.722637	0.445564	2	-19.2246	-42.9108	0	C1715
1717	0.143015	0.662949	-0.641765	-0.541	1.24581	-0.705614	0.507995	0.54889	0.12866	-0.399147	0.169925	-0.283873	-0.454953	20	-0.577504	29.7848	0	C1716
1718	-0.307375	-0.349708	0.0287219	1.11523	0.102728	0.181819	-0.534244	0.181278	-1.14709	0.630622	1.41656	-0.266259	-0.589342	4	-14.9262	54.5102	0	C1717
1719	-0.918671	1.50625	-0.47779	-0.47775	1.76879	0.0957303	0.739661	-2.28617	0.24868	0.558939	1.55682	-0.0921919	-1.01096	7	20.6755	82.4836	0	C1718
1720	1.62333	-0.152202	-0.923504	-0.0802487	0.348594	-0.238637	0.00733651	0.789182	0.000492	-0.764802	-0.491582	-0.258273	0.615779	27	-10.8869	-62.6446	0	C1719
1721	0.575699	0.209306	-0.338059	-0.110213	0.691019	-0.835111	0.386248	0.65017	0.19396	-0.776843	-0.113882	-0.145931	-0.110211	12	-10.8092	8.64824	0	C1720
1722	1.01984	-0.0877991	2.31383	0.349397	-0.731972	0.343376	-0.895305	-1.29332	-0.411662	0.806517	-0.625872	-0.114771	0.567531	3	-54.1668	-13.9396	0	C1721
1723	0.932275	0.502234	-0.397597	-0.124845	0.757131	-0.431534	0.209842	-0.0476441	-0.331902	-0.520433	0.229061	-0.651813	0.101865	26	2.57031	-6.33589	0	C1722
1724	2.19325	-0.493976	-0.399025	0.45409	0.0655628	0.0901131	-0.402599	0.468496	-0.946073	-0.939399	0.248612	-0.738778	1.08198	28	-38.0437	-65.7288	0	C1723
1725	1.50647	-0.204331	-0.0458978	1.0168	0.220965	-0.3169	-0.341423	0.662796	-0.756179	-0.848633	0.0561419	-0.89995	0.460131	28	-36.8287	-62.0555	0	C1724
1726	0.361877	0.526182	-0.455876	-0.455161	0.971861	-0.553013	0.527146	0.0754124	0.21323	-0.516693	0.0968785	-0.249925	-0.293378	9	-4.42987	21.7312	0	C1725
1727	1.33635	-0.275998	-0.652692	0.042225	0.105497	-0.256399	0.34134	0.186369	0.0536207	-1.02675	0.0706269	-0.0708228	0.472224	15	-18.4128	-33.399	0	C1726
1728	-1.38437	-0.310555	0.452974	-0.158886	-0.961063	-0.450302	1.05691	1.9607	1.09709	-0.0340957	-0.999356	0.962413	-0.121999	13	51.0352	-20.5682	0	C1727
1729	1.85729	-0.0551109	-0.339454	0.606337	0.377472	-0.142677	-0.014669	-0.0715204	-0.285579	-0.955547	-0.752942	-0.559143	0.812732	27	-19.5621	-65.7471	0	C1728
1730	0.915772	0.356146	-0.788296	-0.0850739	0.71001	-0.640738	0.219055	0.541391	-0.0278078	-0.729432	0.240416	-0.41708	0.0470251	31	-15.4713	-0.884145	0	C1729
1731	-1.22024	0.0725933	1.37702	0.198084	-0.353527	-0.251831	0.112245	0.411098	1.84588	-0.17243	-1.35088	0.672667	-0.482098	23	34.7397	-52.3004	0	C1730
1732	0.994793	0.26097	-0.663615	-0.215278	0.793981	-0.646843	0.10343	0.557988	-0.293546	-0.555275	0.400984	-0.599004	0.211055	21	-24.8814	2.86437	0	C1731
1733	-1.15725	0.406626	0.0193312	0.867344	0.81738	0.335635	-0.0569375	-1.29993	-0.613969	0.827775	1.46761	-0.0606621	-0.867259	1	-2.77819	73.2094	0	C1732
1734	1.96794	-0.475366	-0.790124	0.222199	-0.0141416	0.00189895	0.0887338	-0.0662176	-0.171462	-0.904734	0.0379458	-0.298871	0.885391	28	-37.8792	-50.3648	0	C1733
1735	0.790686	0.240903	-0.390312	0.0716	0.81426	-0.502516	0.284863	0.288329	0.00358046	-0.847332	0.154344	-0.525233	-0.128172	12	-1.74403	4.91798	0	C1734
1736	1.67503	-0.0330059	-0.775234	0.213377	0.492541	-0.15997	0.125551	0.0607767	-0.109505	-1.0385	-0.128962	-0.437491	0.542246	11	-5.20639	-54.8809	0	C1735
1737	1.67693	-0.454307	-0.338864	0.173982	0.0338292	-0.35985	-0.173378	0.695464	-0.399495	-0.850842	0.175538	-0.346419	0.557325	28	-42.0226	-49.9212	0	C1736
1738	1.09021	-0.0169068	-0.507618	0.329365	0.602101	-0.81174	0.266372	0.555078	-0.139059	-0.984368	0.0777666	-0.249769	0.150033	15	-6.99548	-23.1354	0	C1737
1739	0.367337	0.354001	-0.489981	-0.382319	0.853321	-0.547768	0.164568	0.425174	-0.30978	-0.372957	0.808565	-0.207143	-0.402177	21	-19.8592	13.2144	0	C1738
1740	-1.17526	-0.373351	2.08499	-0.19615	-0.529559	0.0496651	-0.517707	0.828864	1.28237	0.471556	-0.597895	0.236117	-0.605868	23	30.6863	-59.9599	0	C1739
1741	1.32804	0.392357	-0.653587	-0.00274844	0.93716	-0.359698	0.181505	0.112017	-0.185225	-0.858017	-0.186787	-0.627506	0.309849	24	22.3032	-27.2238	0	C1740
1742	1.44796	-0.214231	-0.739324	-0.0584234	0.157731	-0.334384	0.0179421	0.430928	-0.271136	-0.596601	0.231828	-0.200583	0.433252	18	-33.4359	-33.9227	0	C1741
1743	2.21186	-0.805604	-0.43945	0.518276	-0.306317	0.00637428	-0.377376	1.11494	-0.742465	-0.786669	0.144965	-0.86068	1.12314	28	-40.3215	-62.9168	0	C1742
1744	1.10651	0.121648	-0.500883	-0.0319865	0.684555	-0.562667	0.333301	0.191775	-0.00474104	-0.651916	-0.533985	-0.206048	0.328678	34	5.95948	-30.9718	0	C1743
1745	0.97874	0.0747404	-0.549173	0.14316	0.614771	-0.571844	0.152693	0.479041	-0.110781	-0.778867	0.19712	-0.391823	0.0223039	15	-6.17495	-21.0409	0	C1744
1746	1.5004	0.011509	-0.534967	0.0821534	0.57301	-0.329222	0.127479	0.109349	-0.278666	-0.865827	-0.196438	-0.263797	0.375239	11	-1.01192	-47.5716	0	C1745
1747	0.802734	0.381809	-0.266993	0.0155612	0.921691	-0.531459	0.251559	0.725023	-0.0106	-0.857417	-0.527474	-0.470023	-0.125885	33	25.459	-8.4426	0	C1746
1748	-0.965847	0.303575	0.020176	0.903138	0.642778	0.471257	-0.184425	-1.65671	-0.630881	1.05352	1.73322	-0.126281	-0.755618	1	-2.86226	73.1752	0	C1747
1749	-0.731283	0.0656129	0.212642	0.902779	0.521927	0.503316	-0.277161	-1.38317	-0.610458	1.06666	0.785686	0.0790037	-0.599186	1	-5.03309	74.7095	0	C1748
1750	1.06716	0.349419	-0.928922	-0.150732	0.864215	-0.437643	0.277805	0.578492	0.0751104	-0.894622	0.00394174	-0.636268	0.274069	26	0.389867	-14.716	0	C1749
1751	-1.01476	-0.306613	0.733745	0.193679	-0.81829	0.479904	0.459662	-1.26082	0.736546	0.923404	-0.639153	0.893052	0.362398	25	93.1685	20.0033	0	C1750
1752	0.023311	0.249084	0.0762294	-0.687123	-0.916963	2.57781	-0.940073	-1.76219	-0.515583	2.67928	-1.0507	1.27703	0.909851	36	-62.3306	44.5359	0	C1751
1753	-0.809183	-0.0464782	-0.0323381	0.538009	0.584638	0.385071	-0.22326	-1.06757	-0.616999	1.01022	1.22163	0.0578427	-0.541962	1	-0.193002	69.6251	0	C1752
1754	0.181536	0.282976	0.583495	-0.415086	0.706575	-0.672136	0.165211	0.292702	0.230597	-0.59796	0.250848	-0.313311	-0.47434	31	-15.6783	-6.80406	0	C1753
1755	1.46933	0.322515	-0.621162	-0.134272	0.755907	-0.300737	-0.0990659	0.6936	-0.394623	-0.767816	0.0405169	-0.839284	0.308479	15	-0.401992	-29.0443	0	C1754
1756	-0.00109625	0.985898	-0.534672	-0.469708	1.59291	-0.606804	0.725503	0.456283	0.166286	-0.517365	-0.559169	-0.316275	-0.445593	20	14.5622	34.7562	0	C1755
1757	1.25547	0.351351	-0.722855	-0.198616	0.764059	-0.386736	0.287384	0.186598	0.0480208	-0.911083	-0.204713	-0.422542	0.306704	26	7.63892	-11.6906	0	C1756
1758	1.15803	0.405801	-0.58055	-0.242629	0.740571	-0.408027	0.281001	0.267585	-0.14724	-0.830483	-0.129721	-0.413944	0.214021	26	6.17689	-13.0326	0	C1757
1759	1.87865	0.142014	-0.894374	0.4133	0.668998	-0.0816226	-0.0583438	0.343892	-0.700326	-0.884881	-0.000376	-0.880823	0.651581	27	-22.23	-56.1792	0	C1758
1760	0.777275	0.451121	-0.63966	-0.124422	0.993297	-0.683864	0.436122	0.45809	0.103658	-0.793187	-0.197966	-0.195542	-0.246109	12	-2.11224	7.03621	0	C1759
1761	1.16234	0.169247	-0.812088	0.129228	0.831751	-0.542006	0.277415	0.359933	-0.222532	-0.929975	-0.00602511	-0.190082	0.172155	26	-2.66747	-12.3677	0	C1760
1762	1.3203	0.173286	-0.679473	0.283851	0.649672	-0.288261	0.293506	0.469857	-0.182325	-0.864853	-0.744205	-0.456	0.424071	11	0.0166282	-41.4561	0	C1761
1763	-1.30367	-0.793034	0.582187	0.508378	-0.787635	-0.0849533	0.336504	1.36515	0.173948	0.445341	-0.160013	0.622345	-0.227787	22	48.384	7.37912	0	C1762
1764	1.63808	-0.65949	-0.347331	-0.0331472	-0.381319	-0.179308	-0.289178	0.526408	-0.35174	-0.449158	0.758238	-0.333991	0.500925	28	-42.1133	-54.5701	0	C1763
1765	1.59294	0.153031	-0.782247	0.350902	0.495286	-0.292624	0.299547	0.0296992	-0.156076	-1.05613	-0.426843	-0.297185	0.523469	11	-2.38549	-52.7524	0	C1764
1766	1.26335	0.139841	-0.783645	0.499267	0.316605	-0.434279	0.171945	0.383063	-0.151178	-0.932592	-0.0444126	-0.447503	0.379914	11	-7.49458	-46.002	0	C1765
1767	1.09048	0.363382	-0.525737	0.021197	0.669393	-0.49636	0.239634	0.448992	-0.215137	-0.862515	0.0221846	-0.540241	0.0878719	26	-2.55026	-19.848	0	C1766
1768	-0.574951	-0.593898	1.65595	-0.314557	-0.817108	1.17385	-0.979225	-0.164758	0.215757	1.65703	-1.00408	0.523004	0.177101	17	-68.2631	-24.4693	0	C1767
1769	1.02281	0.430419	-0.568704	-0.182798	0.897073	-0.471705	0.146205	0.394827	-0.153387	-0.802238	0.0714248	-0.57685	0.10696	26	4.90709	-14.3892	0	C1768
1770	1.87365	-4.96e-06	-0.231391	0.149049	0.493037	-0.20415	-0.165239	0.448863	-0.499563	-0.900758	-0.274408	-0.74333	0.49993	27	-15.713	-61.0709	0	C1769
1771	1.4361	-0.0234592	-0.913453	-0.0102317	0.490393	-0.265554	0.276659	0.527558	-0.19276	-1.00873	-0.147999	-0.223837	0.485364	15	-12.2554	-30.7641	0	C1770
1772	1.02957	0.321471	-0.583571	-0.285491	0.774255	-0.39684	0.410218	0.344449	-0.00101288	-0.695111	-0.0966641	-0.436829	-0.104569	26	12.3768	-10.4322	0	C1771
1773	1.42596	-0.159284	-0.418617	0.0846759	0.396644	-0.290421	-0.0028357	0.184548	-0.0460223	-0.779551	-0.25014	-0.381636	0.501793	2	-9.73275	-42.1126	0	C1772
1774	0.970685	0.295831	-0.478329	-0.21626	0.755354	-0.631481	0.345483	0.0887692	-0.0206256	-0.729097	0.181028	-0.342167	0.055	26	4.15055	-3.92441	0	C1773
1775	-0.958272	-0.360808	2.43133	-0.221416	-0.248684	-0.396832	-0.238575	0.222012	1.25272	-0.439875	-0.748744	0.352455	0.161355	35	18.0954	-71.889	0	C1774
1776	1.75175	-0.295866	-0.53445	0.363203	0.193991	-0.0617797	-0.192763	0.66587	-0.564277	-0.976639	0.129099	-0.669217	0.666466	28	-32.7798	-57.3549	0	C1775
1777	-0.637835	-0.800844	0.859543	-0.330419	-1.34355	1.41496	-1.31014	-1.65298	-0.806245	2.34757	3.35891	1.06247	0.25251	32	-42.3774	62.4995	0	C1776
1778	2.11476	-0.52337	-0.439915	0.811805	-0.0942737	0.0205274	-0.447624	0.398602	-0.595561	-1.06836	0.127636	-0.690752	1.0428	28	-38.5279	-66.2788	0	C1777
1779	1.20887	0.0697631	-0.513118	-0.188563	0.702371	-0.430629	0.148999	0.633262	-0.407053	-0.745987	0.170173	-0.57774	0.267165	37	-27.6581	-18.9204	0	C1778
1780	1.23426	0.105111	-0.85799	-0.147866	0.551182	-0.340119	0.281762	0.241316	0.120818	-0.780946	-0.156325	-0.192074	0.271097	15	-14.8064	-28.7465	0	C1779
1781	1.62971	-0.328682	-0.667797	-0.0170664	-0.013213	-0.240714	0.152116	0.18075	0.147034	-0.866755	-0.136219	-0.0175328	0.530959	18	-34.0553	-44.029	0	C1780
1782	0.937127	-0.0968132	-0.152361	-0.252061	0.135964	-0.481845	0.281394	0.170764	-0.0769967	-0.717171	0.109006	-0.00856209	0.320252	37	-29.0645	-9.65648	0	C1781
1783	1.21976	-0.0333582	0.125503	-0.107601	0.467266	-0.403581	0.0221272	0.293825	-0.103243	-1.02011	-0.0967628	-0.373747	0.263805	31	-17.6593	-13.4868	0	C1782
1784	-0.97333	0.391218	0.133477	-0.424496	0.980096	0.579772	0.16503	-2.15009	-0.119936	1.20858	2.04974	0.275648	-0.755577	10	22.641	67.9558	0	C1783
1785	-0.955894	0.87255	0.0029155	-0.824244	1.26979	0.354562	0.29156	-1.87326	-0.234509	0.829104	2.31995	-0.0550886	-0.893079	10	22.0238	59.0669	0	C1784
1786	-0.735829	0.762868	-0.541836	-0.322875	1.21465	0.542882	0.17476	-1.13584	-0.517711	1.00128	0.797654	0.144071	-0.839331	7	13.097	69.9838	0	C1785
1787	1.23635	-0.348612	-0.215011	0.722747	-0.00624988	-0.361077	0.0594129	0.240912	-0.289097	-0.790506	-0.0749413	-0.224778	0.3056	2	-12.3368	-50.7418	0	C1786
1788	1.00509	0.409801	-0.488619	-0.249169	0.814851	-0.472186	0.317737	0.165433	-0.0302044	-0.806013	-0.169347	-0.413383	0.190298	26	10.879	-8.94216	0	C1787
1789	-0.607283	-0.759742	0.635808	-0.176995	-0.819079	0.529706	-1.08156	0.772438	-0.151246	1.05952	1.7527	0.0102924	-0.513625	4	-16.1762	59.8241	0	C1788
1790	-0.984044	0.576975	-0.323369	-0.665495	1.11454	0.500963	0.218657	-1.84752	-0.203542	1.22207	1.84414	0.194333	-0.623374	7	19.1808	70.1964	0	C1789
1791	1.70924	-0.0709089	-0.475727	0.512441	0.279294	-0.213361	-0.094669	0.638808	-0.596882	-0.925609	0.0381068	-0.830831	0.511703	28	-26.3536	-55.1475	0	C1790
1792	-0.774996	0.65412	-0.537849	-0.637754	1.29772	0.2967	0.196987	-1.05591	-0.296793	0.832147	1.52825	-0.14004	-0.679203	7	10.6019	71.2103	0	C1791
1793	1.67344	-0.250162	-0.838901	0.230604	0.15517	-0.214965	-0.127167	0.726853	-0.437209	-0.716484	0.150838	-0.564893	0.668041	28	-31.9468	-53.2348	0	C1792
1794	-0.836777	-0.735121	0.334018	0.406836	-1.00551	0.431151	0.438303	0.0336072	0.299613	0.810685	-1.17952	0.929728	0.849647	25	85.3708	6.0514	0	C1793
1795	-0.893069	-0.0824457	0.158102	-0.65107	-1.23135	1.11494	-1.53575	0.37701	-0.33196	1.88766	1.9089	0.686996	-0.0607761	32	-25.5624	66.0329	0	C1794
1796	-1.02565	0.629793	0.000951	-0.71298	1.20345	0.44371	0.285191	-2.23119	-0.0354266	0.828503	2.72119	0.0221767	-0.662716	10	27.2603	58.7454	0	C1795
1797	-0.765254	0.881219	-0.75163	-0.481092	1.37149	0.0811717	0.41958	-1.31066	-0.105243	0.703977	1.53177	-0.0844359	-0.74368	7	12.3849	78.1205	0	C1796
1798	1.48146	0.0805264	-0.680816	0.207577	0.644725	-0.463754	0.325595	0.157243	-0.0108285	-1.06621	-0.524569	-0.202847	0.468136	11	6.77545	-53.6436	0	C1797
1799	1.80852	0.0995374	-0.858562	0.0816627	0.729763	-0.160111	0.221695	0.674968	-0.696643	-0.809914	-0.456943	-0.539074	0.523348	27	-10.6283	-60.2053	0	C1798
1800	-0.982165	0.74035	0.00854761	-0.899359	1.12748	0.484744	0.277622	-2.0138	-0.260274	1.07511	2.57373	-0.00797949	-0.800475	10	23.6943	62.7091	0	C1799
1801	1.72648	-0.20454	-0.715319	0.0593221	0.0941699	-0.168015	-0.0812517	0.183895	-0.284411	-0.892063	0.334603	-0.404127	0.748457	28	-36.5749	-50.7137	0	C1800
1802	0.493233	0.775605	-0.751244	-0.412154	1.16808	-0.682589	0.643438	0.217542	0.122205	-0.906693	0.120912	-0.168495	-0.203153	19	17.1775	16.9021	0	C1801
1803	0.891264	0.584979	-0.751832	-0.243024	0.96755	-0.60074	0.385091	0.446748	0.0065005	-0.723403	-0.267573	-0.291931	-0.0458942	33	19.6457	-3.94632	0	C1802
1804	0.866394	0.706122	-0.816318	-0.259918	1.20064	-0.556567	0.476466	0.581111	-0.0791903	-0.827052	-0.0430786	-0.547723	-0.229921	33	24.6947	6.12492	0	C1803
1805	-1.30509	-0.423899	0.528408	0.924427	-0.703529	0.0564682	0.182412	1.45096	0.277275	0.758988	-1.02934	0.687859	-0.532589	8	57.9788	-9.89739	0	C1804
1806	1.6991	-0.0189823	-0.597862	-0.0735816	0.249806	-0.162877	-0.0637028	0.499077	-0.244756	-0.786842	0.11241	-0.591447	0.337253	18	-40.8411	-36.2166	0	C1805
1807	1.41483	-0.568777	-0.187444	-0.333699	-0.213837	-0.477418	0.228389	0.687421	0.184793	-0.826556	-0.0343782	-0.11127	0.592921	18	-35.3807	-39.3404	0	C1806
1808	1.93944	-0.289115	-0.243383	0.286267	0.29277	-0.0376104	0.0171672	0.0745833	-0.258681	-1.10099	-0.594501	-0.484225	0.872313	27	-19.1149	-67.0455	0	C1807
1809	0.878269	0.0440422	-0.337653	0.0296305	0.659363	-0.528033	0.350202	0.132012	-0.153291	-0.702132	0.17422	-0.381919	0.0457443	31	-9.82105	-15.1712	0	C1808
1810	0.924181	0.265375	-0.464716	-0.346307	0.959008	-0.502152	0.190747	0.645992	-0.10142	-0.753458	0.0773815	-0.536315	-0.0489917	31	-9.15387	2.62933	0	C1809
1811	1.69478	-0.338096	-0.365803	0.420603	0.167565	-0.255118	-0.0977723	0.260394	-0.160887	-0.972597	0.000158	-0.490161	0.499757	27	-25.3174	-62.4273	0	C1810
1812	1.17342	0.618123	-0.580215	-0.0620518	0.999519	-0.450767	0.544531	-0.067673	0.0414889	-0.909395	-0.821281	-0.269879	0.19925	24	32.3496	-22.4392	0	C1811
1813	1.37468	0.237743	-0.637734	0.0722981	0.800555	-0.437365	0.355992	0.384911	0.0465172	-0.94564	-0.966373	-0.209521	0.383045	34	19.001	-41.5289	0	C1812
1814	0.350774	0.350203	-0.85522	-0.433817	0.905538	-0.551513	0.44765	0.585432	0.159818	-0.492391	0.249692	-0.077279	-0.302762	9	-15.0578	14.6784	0	C1813
1815	0.819033	-0.171945	-0.527852	-0.293267	0.35742	-0.471424	0.0197308	1.09966	-0.22234	-0.368858	0.584747	-0.460056	-0.0782897	21	-30.0201	10.3637	0	C1814
1816	1.08732	-0.331173	-0.428838	0.0110726	0.326403	-0.373044	0.331193	-0.0392593	-0.025383	-0.725899	0.189844	0.0299577	0.152457	15	-20.0305	-23.487	0	C1815
1817	-0.791678	-0.601801	1.31544	0.102865	-0.778948	0.90419	-0.590872	-0.342416	0.358853	1.45909	-0.929716	0.678584	-0.0511586	17	-72.3135	-17.38	0	C1816
1818	1.50656	-0.41272	-0.585343	0.253773	0.260988	-0.447594	0.202208	0.298485	-0.207434	-0.73555	0.0470742	-0.182011	0.323896	18	-29.6487	-38.6981	0	C1817
1819	-1.00041	0.800627	0.105738	-0.778745	1.25983	0.197012	0.406065	-2.30153	0.14406	0.672879	2.68352	0.0107975	-0.625055	10	25.3157	56.8264	0	C1818
1820	-1.34322	-0.113712	3.29407	-0.284724	-0.353102	-0.590274	-0.258944	-0.0833671	1.49276	-0.573509	-0.489904	0.313167	0.0793053	35	16.3977	-82.0469	0	C1819
1821	-1.22138	0.561523	-0.0695088	0.482418	0.946812	0.235394	0.0933343	-1.52588	-0.427566	0.847757	1.9368	-0.0599636	-0.951985	1	-0.452581	72.1782	0	C1820
1822	1.19653	0.399099	-0.919975	0.113944	0.864565	-0.387017	0.0724452	0.334523	-0.176652	-0.796677	-0.0287126	-0.481513	0.201129	24	15.5515	-24.0009	0	C1821
1823	0.426716	0.460563	-0.498442	-0.417227	1.05318	-0.521326	0.374691	0.845211	-0.0203207	-0.705004	0.222625	-0.436459	-0.455303	9	-7.00391	15.149	0	C1822
1824	1.60801	0.253327	-0.80672	0.222223	0.829422	-0.254333	0.1035	0.348939	-0.397755	-0.81357	-0.553959	-0.689235	0.668632	11	0.289698	-63.7688	0	C1823
1825	-1.05821	-0.392909	2.48472	-0.359364	-0.109077	-0.435646	-0.195045	0.669786	1.45015	-0.142488	-1.30325	0.410025	0.0358815	35	23.5147	-71.7181	0	C1824
1826	1.21721	0.0806207	-0.518633	-0.210636	0.76422	-0.541111	0.152972	0.285718	-0.159945	-0.697177	0.0616425	-0.439498	0.301368	15	-14.9659	-22.3944	0	C1825
1827	-0.911379	0.799073	-0.744691	-0.520741	1.27628	0.387837	0.397013	-1.81167	-0.165373	1.18953	1.46532	0.26515	-0.598863	7	15.6991	75.1411	0	C1826
1828	-1.25096	-0.317912	3.27772	-0.270694	-0.41078	-0.680037	-0.347872	0.0650072	1.49366	-0.511005	-0.861283	0.707803	0.324754	35	14.192	-79.7964	0	C1827
1829	0.538498	0.491506	-0.784032	-0.311565	0.952151	-0.599135	0.470864	0.54742	0.0763493	-0.477087	-0.0801345	-0.27844	-0.222002	12	8.36804	12.8778	0	C1828
1830	0.987769	0.159083	-0.768977	-0.113171	0.776775	-0.506003	0.311847	-0.0453923	0.129529	-0.709097	0.273717	-0.246929	0.0423848	31	-19.3767	-3.64122	0	C1829
1831	-0.578704	0.0344573	0.254203	-0.668922	-1.29405	1.78396	-1.08975	-1.39685	0.446985	1.43931	1.74803	0.469422	0.123582	5	-45.1929	27.2184	0	C1830
1832	1.2232	0.158553	-0.598085	-0.0725174	0.489642	-0.354079	0.139024	0.404924	-0.208702	-0.873616	0.148988	-0.49477	0.336972	15	-7.26568	-28.5424	0	C1831
1833	-0.449016	0.838586	-0.616596	-0.592576	1.36398	-0.729159	0.747806	0.376323	0.207858	-0.268508	0.270008	-0.217155	-0.465819	9	-6.97761	34.3493	0	C1832
1834	1.62232	-0.306856	-0.448358	0.204066	0.100877	-0.274737	-0.0262037	0.142404	-0.285798	-0.937405	0.321318	-0.416511	0.659211	28	-35.2747	-49.7989	0	C1833
1835	1.32824	0.138991	-0.721011	-0.177465	0.60615	-0.389598	0.150296	0.716797	-0.329305	-0.819429	0.0823344	-0.529242	0.316707	18	-29.2861	-27.4362	0	C1834
1836	1.65478	-0.257155	-0.527046	0.178999	0.114568	-0.418725	0.190609	0.384235	-0.105739	-0.987619	-0.183021	-0.234701	0.57059	2	-31.0392	-46.3335	0	C1835
1837	-1.03718	0.306832	1.24376	0.918814	-0.240416	-0.0656882	0.0855847	1.16284	0.105004	-0.234178	-0.882938	0.213916	-0.796563	23	24.0821	-53.3224	0	C1836
1838	-0.00928316	0.487751	0.183251	-0.77032	-0.702197	2.49918	-0.844674	-1.95498	0.757323	2.03606	-1.27004	0.862143	0.573781	6	-68.6082	27.3619	0	C1837
1839	-0.0192772	-0.954942	2.03616	-0.704986	-0.737138	1.30433	-0.557875	-0.843976	0.755874	-0.523601	-1.45083	0.502936	2.60633	16	86.1767	-12.9842	0	C1838
1840	0.771887	-0.0691485	-0.454686	-0.324655	0.512092	-0.51068	0.257141	0.80236	-0.0203984	-0.836664	0.208278	-0.150613	0.062071	37	-28.9187	-4.83384	0	C1839
1841	-0.611026	0.248903	0.618139	-0.98922	-1.25824	1.75876	-1.27509	-0.807619	0.312975	1.34107	1.36303	0.258708	0.162073	5	-47.6644	24.3117	0	C1840
1842	-1.08772	0.782445	-0.199315	0.366831	1.27257	0.11449	0.369112	-1.60862	-0.128462	0.744915	1.16448	-0.0705237	-0.937851	1	4.25475	81.9867	0	C1841
1843	1.32955	0.257051	-0.311495	0.0639378	0.5933	-0.489461	0.120818	0.590221	-0.207141	-0.641315	-0.564168	-0.707621	0.304771	34	4.64959	-27.4833	0	C1842
1844	1.60929	-0.51335	-0.204045	0.146247	-0.041687	-0.316216	-0.202623	0.3698	-0.304153	-0.777522	0.457847	-0.418932	0.522643	28	-41.1537	-53.7114	0	C1843
1845	0.58177	0.449049	-0.35678	-0.454346	1.01888	-0.640496	0.442409	-0.080891	0.165523	-0.555577	0.246051	-0.221777	-0.332753	9	-3.28027	22.1178	0	C1844
1846	-0.618851	-0.565251	0.0743085	-0.627724	-1.3078	1.69725	-1.06625	-1.89546	-0.579937	2.4723	3.33269	1.18908	0.386119	32	-42.9498	60.2579	0	C1845
1847	1.20452	-0.0272938	-0.274859	-0.0351542	0.422618	-0.445937	-0.0558516	0.614474	-0.549746	-0.637919	0.519601	-0.692659	0.250415	18	-41.656	-23.8156	0	C1846
1848	1.42092	-0.497632	-0.58151	-0.0323358	-0.0859108	-0.37804	0.124808	0.514163	-0.0559855	-0.719167	0.469124	-0.144215	0.285449	18	-34.1708	-35.9201	0	C1847
1849	1.4955	-0.214516	-0.491326	0.408618	0.254344	-0.254497	0.271505	0.0616845	0.0241961	-0.947453	-0.675064	0.0138697	0.402582	27	-6.39482	-68.4056	0	C1848
1850	-0.781165	-0.293795	0.276171	-0.13835	-1.09132	1.18929	-0.634163	-1.60813	-0.704915	2.03697	2.83225	0.687609	0.146717	32	-40.022	61.6343	0	C1849
1851	-1.31954	-0.379491	2.31905	-0.318607	-0.53179	-0.28523	-0.337816	1.01836	1.35958	0.164411	-0.561858	0.0526629	-0.280569	23	22.0115	-65.9085	0	C1850
1852	1.0525	0.149614	-0.483745	0.00821525	0.870521	-0.460451	0.070797	0.596552	-0.233539	-0.809319	0.164848	-0.600633	-0.0246712	26	3.19057	-17.486	0	C1851
1853	1.85308	-0.251496	-0.651127	0.214859	0.265904	-0.0410777	-0.0880371	0.344162	-0.431134	-1.00286	0.157641	-0.586852	0.678119	28	-29.4285	-61.6543	0	C1852
1854	-0.651777	-0.480816	0.741633	-0.717823	-1.4361	1.66121	-1.43384	-0.754024	-0.471521	1.621	2.9347	0.579957	0.209712	30	-34.6647	35.6152	0	C1853
1855	1.42662	0.171683	-0.697935	0.216904	0.907304	-0.411627	0.407773	-0.316269	0.0899739	-0.95433	-0.424228	-0.14787	0.150721	34	18.692	-36.5756	0	C1854
1856	-0.984086	0.881853	0.0355407	-0.756365	1.31567	0.428644	0.356957	-2.28316	-0.0975362	0.980934	2.11604	0.0925416	-0.673443	7	23.4106	73.8095	0	C1855
1857	0.0215161	0.182068	-0.251939	-0.705295	-0.971026	2.6376	-1.15465	-1.09314	-0.605825	2.56388	-1.02284	1.13286	0.890276	36	-65.5478	42.5571	0	C1856
1858	-0.173006	-0.0180823	0.78608	-0.677081	-1.34575	2.14491	-1.17931	-1.98503	-0.599798	1.97812	1.67727	0.910355	0.428214	30	-40.0881	46.8648	0	C1857
1859	0.243335	0.635486	-0.300201	-0.189025	1.15151	-0.620988	0.390083	0.0493778	0.0405993	-0.607841	0.499029	-0.541175	-0.45945	9	-2.59137	24.4857	0	C1858
1860	-1.20311	0.204274	0.242235	0.186337	0.854492	0.519482	0.0742899	-1.52602	-0.516345	1.01562	2.02898	0.0293299	-1.0122	1	6.5504	65.7204	0	C1859
1861	0.346479	-0.303759	-1.00219	-0.824087	-0.373746	0.0398362	1.33779	-0.92959	1.00132	0.0121961	-0.899116	1.53837	0.78779	23	38.4007	-45.1101	0	C1860
1862	-1.05124	0.728926	-0.409845	0.0289245	1.23986	0.361645	0.300147	-1.71301	-0.233099	0.961519	1.35584	0.0522638	-0.79909	7	8.78207	76.0054	0	C1861
1863	1.10252	0.418309	-0.882919	0.0494857	0.897455	-0.360417	0.315676	0.484034	-0.111347	-0.806605	-0.568465	-0.332837	0.201953	24	12.867	-23.4742	0	C1862
1864	1.32983	-0.21508	-0.523398	-0.0435482	0.0803608	-0.425829	0.0884788	0.242373	-0.262481	-0.658518	0.38181	-0.159603	0.412542	18	-34.1705	-33.8588	0	C1863
1865	-1.05537	0.376137	0.421861	-0.735185	0.730129	0.83998	-0.0859178	-2.44162	-0.679792	1.47805	3.30454	0.525449	-0.54409	10	32.5921	64.036	0	C1864
1866	1.08732	0.0725275	-0.268797	-0.0842706	0.503684	-0.480885	0.046746	0.349726	-0.241107	-0.756785	0.134417	-0.355905	0.201692	37	-23.1065	-14.6926	0	C1865
1867	-1.21022	0.800014	-0.0289045	-0.87795	1.0533	0.43163	0.117477	-1.55009	0.555742	0.93464	1.57627	0.0887108	-0.970411	7	13.9719	73.3886	0	C1866
1868	0.917752	0.561692	-0.472418	0.182988	1.11293	-0.684988	0.345504	0.403885	0.0579359	-0.806234	-0.570427	-0.534243	-0.122521	33	24.3266	-6.93166	0	C1867
1869	-1.23929	-0.370458	3.18819	-0.291484	-0.292244	-0.55719	-0.190494	0.274047	1.37179	-0.493322	-0.657062	0.272024	0.0681904	35	16.757	-80.8365	0	C1868
1870	-0.792203	-0.668875	0.214648	-0.671978	-1.38177	1.42667	-1.11957	-0.5981	-0.704519	2.09884	3.17836	0.888129	0.0149877	32	-36.9792	66.0221	0	C1869
1871	0.0867016	0.843769	-0.628385	-0.136682	1.26473	-0.601047	0.547162	0.172412	0.136349	-0.490242	0.136005	-0.455994	-0.52349	20	13.0462	25.7391	0	C1870
1872	0.738208	0.166952	-0.42797	-0.392199	0.838958	-0.563386	0.323563	0.385942	0.142377	-0.684912	-0.477888	0.0796749	0.137726	26	12.7588	-7.46569	0	C1871
1873	1.1693	0.225649	-0.422888	0.20061	0.598627	-0.496752	0.126173	-0.0853943	-0.435114	-0.699759	0.317423	-0.4993	0.270165	2	-15.8571	-39.4317	0	C1872
1874	1.18206	0.287661	-0.533855	-0.132292	0.793494	-0.338053	0.253146	0.752274	-0.238457	-0.841527	-0.416779	-0.58143	0.19775	26	8.44904	-20.6161	0	C1873
1875	-1.0173	-0.507189	1.00752	-0.870128	-1.5851	1.08584	-1.10703	0.505116	-0.51067	1.89619	2.66717	0.645075	-0.467629	32	-28.6726	71.1528	0	C1874
1876	-1.00572	0.436998	0.0903374	-0.743004	0.995125	0.338597	0.138124	-2.00728	-0.0980116	0.946596	2.48873	0.169657	-0.578484	10	26.142	62.4633	0	C1875
1877	-1.17468	-0.825752	0.270267	-0.658857	-1.60324	1.03207	-1.04889	1.68116	-0.591452	1.78946	2.437	0.63235	-0.0730366	32	-21.818	72.8473	0	C1876
1878	1.45435	-0.313993	-0.853877	0.475423	0.193147	-0.207515	0.17403	0.157664	-0.140849	-0.902189	0.123204	-0.200611	0.407416	28	-32.9567	-46.3825	0	C1877
1879	-1.3016	-0.529383	0.722573	1.29344	-0.804905	0.363867	0.167204	0.0563633	0.349287	0.808288	-1.03754	0.729136	0.0165318	38	71.2406	-0.692466	0	C1878
1880	1.18828	-0.0332917	-0.67421	0.265353	0.52787	-0.469277	-0.0269084	0.344253	-0.35382	-0.658078	0.438747	-0.577403	0.341077	37	-28.3209	-24.2691	0	C1879
1881	1.2506	0.243965	-0.662842	0.172068	0.579758	-0.452661	0.226134	0.527648	-0.0145404	-0.894566	-0.461272	-0.520911	0.376608	34	11.6577	-31.7356	0	C1880
1882	-1.27798	0.366695	0.584633	1.99006	0.874336	0.199154	0.0581757	-1.66562	-0.383127	0.799279	0.71241	-0.164392	-1.06201	1	-5.83448	80.86	0	C1881
1883	-1.1706	-0.417131	1.52985	0.830831	-0.946801	0.566812	-0.635029	0.106802	0.295713	1.20182	-0.869254	0.360885	-0.00570176	29	-73.6494	-9.20608	0	C1882
1884	-0.0801564	0.225275	-0.183087	-0.548767	0.830803	-0.650439	0.62501	0.858672	0.285556	-0.416103	-0.164714	0.098851	-0.585349	9	-14.4889	27.3925	0	C1883
1885	-0.391584	0.221737	0.374999	-1.01243	-1.04131	1.97223	-1.2659	-1.8939	0.235507	1.40942	2.19855	0.403077	0.394443	5	-42.7012	28.5316	0	C1884
1886	-1.21903	0.329469	1.23342	-0.303462	0.436317	-0.716188	0.0395061	3.10847	0.959524	-0.266839	-1.29631	-0.153675	-0.824371	13	51.2407	-43.5913	0	C1885
1887	-0.749819	-0.085272	1.71614	-0.104067	-0.298296	-0.417783	-0.653327	0.931583	1.06752	0.0565966	-0.615637	0.175928	-0.363479	23	26.1576	-59.3503	0	C1886
1888	0.902384	0.411471	-0.406733	-0.234544	0.863513	-0.55469	0.21685	0.0281908	-0.00331259	-0.717776	0.160334	-0.433605	0.0242025	26	3.84595	-4.0929	0	C1887
1889	1.91078	-0.301745	-0.596332	0.216303	0.173352	-0.0219437	-0.0549242	0.591072	-0.291563	-0.970061	-0.497115	-0.483238	0.813531	27	-22.2285	-69.3157	0	C1888
1890	1.02308	0.19372	-0.717701	-0.0556784	0.641741	-0.431935	0.21536	0.318835	-0.151612	-0.771893	0.155219	-0.281372	0.136445	15	-6.51237	-17.5926	0	C1889
1891	-0.297331	-0.00474306	0.156164	-0.595506	-0.759089	2.11802	-1.05456	-1.24015	0.399678	2.12861	-0.980518	0.867745	0.468596	6	-63.7304	24.2034	0	C1890
1892	1.13654	0.623193	-0.776752	-0.156964	1.1314	-0.556031	0.519725	0.649791	-0.0749143	-0.681695	-0.729896	-0.535246	-0.0172734	33	31.6147	-6.07673	0	C1891
1893	1.13229	-0.118629	-0.203355	-0.0535489	0.217312	-0.223886	-0.259352	0.479113	-0.365934	-0.520022	0.515952	-0.555631	0.167561	18	-39.5949	-28.7519	0	C1892
1894	-1.02977	-0.317361	2.186	-0.122032	-0.332815	-0.359381	-0.0931034	0.673252	1.1806	-0.135176	-0.860101	0.0736117	-0.0890521	23	22.9473	-67.0154	0	C1893
1895	1.05108	0.0713592	-0.208939	-0.286014	0.490907	-0.48285	0.231712	0.889627	-0.344645	-0.610331	-0.25593	-0.460213	0.190867	37	-41.1688	-14.3846	0	C1894
1896	-0.693468	-0.0907822	-0.376568	-0.841909	-1.04552	1.64564	-0.631577	-0.897258	0.405667	1.43866	1.36248	0.477472	0.151105	5	-48.9733	23.5564	0	C1895
1897	-0.975155	0.695861	-0.596257	-0.849913	1.09702	0.506799	0.214552	-1.72677	-0.277166	1.1798	2.23237	0.0888311	-0.486805	10	20.6206	66.1075	0	C1896
1898	0.301476	0.0465352	-0.22129	0.584865	0.645556	-0.63115	0.322468	0.714067	-0.121857	-0.736776	0.146066	-0.375718	-0.428969	21	-29.8247	16.4571	0	C1897
1899	1.79076	-0.10566	-0.541246	0.138153	0.484455	-0.0117019	0.126309	-0.183717	-0.126582	-1.01231	-0.443066	-0.393929	0.6882	11	-4.84507	-53.3959	0	C1898
1900	-0.462623	0.153094	0.00589349	-0.866598	-0.927805	1.91692	-1.09675	-2.00068	0.720273	1.58379	2.03529	0.464965	0.150904	5	-46.2439	29.7036	0	C1899
1901	1.94132	-0.405579	-0.711025	0.184426	0.227072	0.0180088	-0.0434819	0.287079	-0.392521	-1.01915	0.140155	-0.544332	0.833147	28	-29.3853	-61.9392	0	C1900
1902	0.0359853	0.207116	0.542912	0.0471159	0.00424884	-0.671153	0.45869	-0.832017	1.44342	-0.811068	-0.862966	0.841376	0.00544843	23	36.8437	-46.4993	0	C1901
1903	1.2143	0.37041	-0.478693	0.1305	0.819158	-0.519033	0.350828	0.508993	-0.142872	-0.962272	-0.642002	-0.562675	0.303662	34	12.7678	-31.067	0	C1902
1904	-0.632723	0.0470435	1.17189	-1.03707	-1.28201	1.79505	-1.34334	-1.34322	0.527728	1.06004	2.05404	0.341675	0.0975801	5	-42.9226	30.3658	0	C1903
1905	-1.07174	-0.54169	-0.0682084	0.801483	-0.738622	-0.221327	0.239127	-0.4444	0.582577	0.220432	0.88403	0.991353	-0.268368	14	60.6812	27.7901	0	C1904
1906	1.3119	0.534232	-1.00567	0.246353	0.966452	-0.407655	0.322758	0.0633951	-0.264973	-1.01638	-0.179523	-0.414611	0.337892	34	13.5202	-36.0468	0	C1905
1907	1.08814	-0.0645984	-0.540615	0.0328151	0.393805	-0.437059	0.295151	0.458531	-0.0651795	-0.977835	0.0866081	-0.172657	0.165408	15	-13.5636	-20.3947	0	C1906
1908	1.36332	0.196165	-0.765315	-0.100065	0.817535	-0.231585	0.42529	0.319179	0.0222872	-0.854739	-0.649904	-0.436367	0.319128	34	17.2509	-41.5594	0	C1907
1909	1.76651	-0.0976967	-0.646606	0.568258	0.280062	-0.321565	-0.0391436	0.955509	-0.325115	-0.895294	-0.414799	-0.841531	0.575268	27	-17.0249	-62.8062	0	C1908
1910	1.10859	-0.0334376	-0.420664	0.0194576	0.41938	-0.53311	0.167956	0.352	-0.0406767	-1.00789	0.0296617	-0.147326	0.344238	15	-17.2893	-23.98	0	C1909
1911	-1.00455	-0.229999	1.4908	0.180188	-0.865795	0.770865	-0.653131	-0.699654	0.70323	1.27877	-0.812496	0.510115	0.102228	17	-69.173	-15.5183	0	C1910
1912	-0.310107	0.279063	0.0984371	-0.647989	-0.797036	2.08448	-0.762961	-1.78906	0.673003	2.01093	-0.601674	0.72276	0.359178	6	-60.3954	26.9727	0	C1911
1913	2.00441	-0.115625	-0.51669	0.373922	0.235661	-0.0857105	0.0557432	0.195478	-0.428609	-1.01031	-0.635397	-0.46086	0.903095	27	-19.8314	-68.2368	0	C1912
1914	1.67978	0.0779058	-0.550666	0.201889	0.435157	-0.274724	-0.165582	0.240185	-0.550395	-0.936175	0.254579	-0.686634	0.715678	27	-23.993	-55.6583	0	C1913
1915	1.13429	0.184995	-0.84822	0.286239	0.661975	-0.630166	0.0768177	0.484003	-0.0907566	-0.940548	0.254796	-0.323829	0.135934	15	-5.44948	-22.684	0	C1914
1916	-0.331219	0.174354	0.678023	-0.353064	-0.96382	1.92495	-0.760644	-1.80113	0.475143	2.11956	-0.984016	0.836729	0.62559	6	-64.136	25.2868	0	C1915
1917	-1.08746	0.330419	-0.0734934	0.150188	0.693459	0.667159	-0.0783504	-1.84832	-0.472932	1.28842	1.75731	0.250247	-0.642512	1	5.01064	67.8828	0	C1916
1918	1.00941	0.466669	-0.646797	-0.361776	0.943813	-0.500128	0.514439	0.407912	0.07619	-0.729334	-0.665844	-0.299705	0.184124	24	30.4543	-13.2613	0	C1917
1919	1.16837	-0.159971	-0.650436	0.103218	0.279403	-0.429025	0.242724	0.857721	-0.283365	-0.810226	-0.111881	-0.119228	0.226476	37	-37.2314	-15.9113	0	C1918
1920	1.09184	0.056232	-0.486742	-0.064629	0.677393	-0.434838	0.136311	0.240665	-0.274604	-0.647984	0.30752	-0.533651	0.187904	37	-23.2877	-10.4762	0	C1919
1921	1.12055	0.271287	-0.453885	0.145621	0.820366	-0.655871	0.389948	0.00687879	-0.148384	-0.728734	0.0160088	-0.596036	0.124218	24	19.6453	-20.6749	0	C1920
1922	-0.930878	0.480443	-0.315978	-0.0154556	0.805218	0.200513	0.121001	-0.247855	-0.529275	0.682485	1.41481	-0.131805	-1.06563	4	-5.78451	62.4322	0	C1921
1923	1.08608	0.647454	-0.718031	0.11608	1.20272	-0.602073	0.423567	-0.281917	0.0606934	-0.872111	-0.331563	-0.502902	0.205928	24	29.5092	-20.6641	0	C1922
1924	1.64347	0.0631354	-0.375449	0.307026	0.29368	-0.308659	-0.127231	0.73519	-0.632728	-0.939325	0.199662	-1.03527	0.713466	28	-26.372	-54.6434	0	C1923
1925	-1.2466	-0.462354	3.11886	-0.186298	-0.580223	-0.654468	-0.0762855	-0.0786812	1.55894	-0.60232	-0.634138	0.660291	0.475475	35	12.3356	-80.4881	0	C1924
1926	-0.993779	-0.470598	1.38842	-0.186321	-0.90243	0.659162	0.570118	-1.50872	0.690166	1.20124	-0.507702	1.06497	0.0778867	25	97.2457	20.9822	0	C1925
1927	-0.709798	0.285682	1.18229	0.648086	-0.618704	0.324614	-0.634962	0.499871	0.115136	0.396254	-0.478711	0.107843	-0.533149	3	-47.5861	1.27113	0	C1926
1928	1.20708	0.264047	-0.351567	0.0658687	0.724144	-0.443291	0.149555	0.546234	-0.165077	-0.864521	-0.405447	-0.620564	0.199125	34	4.87137	-26.852	0	C1927
1929	1.61928	-0.276622	-0.223905	0.267194	0.169649	-0.18782	0.110037	0.674958	-0.231494	-1.0148	-0.711103	-0.401152	0.617103	27	-14.0508	-64.2277	0	C1928
1930	1.84004	-0.490325	-0.626887	0.47582	0.0738585	-0.00822831	-0.286842	0.528822	-0.407222	-0.835668	0.143233	-0.657077	0.742154	28	-42.2939	-60.8231	0	C1929
1931	1.66799	-0.139107	-0.895952	0.0137786	0.173363	-0.094012	-0.0487516	0.55732	-0.313397	-0.930981	0.464027	-0.513357	0.521131	18	-27.0778	-34.0624	0	C1930
1932	-0.912356	-0.7252	1.97203	-0.225019	-0.853782	0.917884	-0.703655	-0.950853	0.999658	1.46389	-0.700817	0.695034	0.0681237	17	-67.2029	-13.0601	0	C1931
1933	1.24736	-0.204504	-0.257806	-0.090551	0.363534	-0.381853	0.235016	0.135297	-0.00966668	-0.907116	-0.268228	-0.0524761	0.436555	2	-15.3283	-36.7543	0	C1932
1934	0.567483	0.434197	-0.673045	0.0142635	1.00962	-0.594702	0.466473	0.435096	0.0199286	-0.583814	0.166906	-0.597264	-0.337092	12	-0.530733	13.6592	0	C1933
1935	-0.938326	-0.632434	0.660026	-0.60349	-1.48295	1.27554	-1.24442	0.443141	-1.01368	2.02814	3.02186	0.758771	-0.243	32	-29.3739	70.9441	0	C1934
1936	1.40057	-0.081249	-0.641968	-0.133961	0.535213	-0.298097	0.181127	0.287941	-0.226892	-0.63398	-0.22822	-0.407372	0.552647	15	-10.9327	-38.0167	0	C1935
1937	0.117442	0.632173	-0.0968714	-0.714179	-0.886154	2.36467	-0.89269	-1.81831	0.671575	2.23744	-1.40268	0.964319	0.724939	6	-67.9017	28.8258	0	C1936
1938	0.394575	-0.00107908	-0.153685	0.114726	0.514169	-0.600476	0.32513	0.502588	-0.205425	-0.659236	0.0332909	-0.0247979	-0.0909511	21	-28.9344	0.946853	0	C1937
1939	0.838074	0.250861	-0.43507	-0.106824	0.831226	-0.676956	0.245564	0.512822	-0.050633	-0.792353	-0.00809507	-0.378443	0.0409583	31	-8.55876	-4.62326	0	C1938
1940	-1.06361	0.334061	-0.056896	0.612286	0.763122	0.698364	0.101335	-2.02223	-0.447468	1.23678	1.44159	0.129206	-0.67186	1	1.51492	75.0387	0	C1939
1941	1.03227	0.289204	-0.309977	-0.184903	0.690064	-0.442114	0.122338	0.281363	-0.0291678	-0.834226	0.0780464	-0.574843	0.12544	31	-8.51121	-12.269	0	C1940
1942	0.85649	0.498489	-0.66911	-0.0805776	0.966855	-0.665696	0.277636	0.0328849	0.00886601	-0.686917	0.365146	-0.452192	-0.134514	12	2.77047	-0.361868	0	C1941
1943	0.724565	0.607895	-0.918552	-0.295792	1.25143	-0.695639	0.744746	0.493027	0.216798	-0.739507	-0.565492	-0.242625	-0.0477723	33	22.5462	-1.68643	0	C1942
1944	1.62716	-0.0954449	-0.481732	0.311658	0.260543	-0.130739	-0.0310486	0.493814	-0.417281	-0.874981	-0.266608	-0.463168	0.409557	2	-26.7754	-47.957	0	C1943
1945	1.41864	0.333753	-0.449348	0.267005	0.721503	-0.558094	0.117104	0.159354	-0.149994	-1.04259	-0.160139	-0.624621	0.363862	11	6.30573	-47.4856	0	C1944
1946	1.20527	-0.130824	-0.30504	-0.107211	0.390522	-0.451712	0.092918	0.107455	-0.0723167	-0.720662	0.361796	-0.453349	0.316706	15	-22.3547	-25.7976	0	C1945
1947	0.552232	0.482526	0.0271689	0.202939	0.927674	-0.659341	0.359494	0.804505	-0.258275	-0.777696	-0.297959	-0.780374	-0.221134	33	19.433	-11.8056	0	C1946
1948	1.10687	0.232813	-0.469609	-0.226507	0.718907	-0.344617	0.368068	0.41893	-0.280833	-0.748454	-0.207146	-0.420683	0.133999	26	5.93677	-20.9499	0	C1947
1949	1.47051	0.0233789	-0.673319	0.0486789	0.528659	-0.399099	0.182268	0.484601	-0.369874	-0.901649	0.0865955	-0.562324	0.476685	2	-20.936	-43.5606	0	C1948
1950	0.979582	0.39378	-1.1017	-0.481231	0.879394	-0.477399	0.388665	0.173695	0.23014	-0.614142	0.129328	-0.197706	0.170475	12	6.66107	0.674963	0	C1949
1951	-1.27237	-0.139269	3.08668	-0.282098	-0.328019	-0.590389	-0.380664	-0.111946	1.34553	-0.583101	-0.472238	0.540774	0.367981	35	14.7601	-80.6132	0	C1950
1952	1.80026	-0.515353	-0.47516	0.125393	0.136983	-0.0606369	-0.00241638	0.538301	-0.240941	-0.87472	-0.523149	-0.258956	0.796919	27	-23.9879	-69.1083	0	C1951
1953	0.957958	0.370464	-0.523965	-0.292428	0.972407	-0.523363	0.398809	0.4496	-0.126071	-0.764051	-0.518798	-0.282009	0.220099	26	13.3193	-12.9886	0	C1952
1954	1.82148	-0.227787	-0.444084	0.362062	0.0962979	-0.254132	-0.317628	0.89321	-0.601365	-0.955729	0.290058	-0.783167	0.657405	28	-33.2634	-56.9082	0	C1953
1955	1.21522	0.0214359	-0.576855	-0.236409	0.612874	-0.6155	0.395793	0.294293	0.111646	-0.969147	-0.21578	-0.019143	0.322858	15	-13.0843	-21.8723	0	C1954
1956	-0.253968	1.59058	-0.571799	-0.521398	1.80952	-0.0929511	0.716836	-2.24436	0.181211	0.220161	1.52419	-0.32126	-0.881288	7	20.6429	82.8411	0	C1955
1957	1.55526	0.0628357	-0.594574	0.0431902	0.427748	-0.324705	0.226493	0.280321	-0.172651	-1.03549	-0.374366	-0.250668	0.531301	11	-5.0137	-49.2541	0	C1956
1958	0.620392	0.283718	-0.844164	-0.388678	0.617908	-0.43309	0.30655	0.519612	0.0602812	-0.519872	0.48479	-0.326703	-0.0936195	21	-19.1617	1.3155	0	C1957
1959	-1.20496	0.571553	0.35864	1.10707	1.01998	0.16574	0.193242	-2.1584	-0.394058	0.686579	2.04212	-0.174011	-1.00012	1	-6.9323	79.7341	0	C1958
1960	1.46641	-0.141159	-0.556683	0.738551	0.394993	-0.407887	0.156611	0.0985526	0.142778	-1.09316	-0.505912	-0.245925	0.370749	11	-5.35443	-57.3784	0	C1959
1961	1.13458	0.036221	-0.579487	-0.353671	0.477405	-0.399826	0.210166	0.3289	-0.138658	-0.653782	0.319739	-0.344949	0.224862	37	-22.1439	-11.4481	0	C1960
1962	-0.982336	-0.326474	0.316384	0.0158954	-1.0799	0.410334	0.322737	0.693727	0.294813	1.01984	-0.895822	0.763012	0.0920046	38	78.5683	-3.51279	0	C1961
1963	0.449117	0.630176	-0.64439	-0.455223	1.28903	-0.613259	0.621216	0.457216	0.133561	-0.512417	-0.206612	-0.266044	-0.488983	19	10.5538	18.4577	0	C1962
1964	0.591629	0.301633	-0.560021	-0.277756	0.822642	-0.689453	0.401965	0.481557	0.0384493	-0.587157	0.0127679	-0.220294	-0.0554984	12	-3.92996	6.58291	0	C1963
1965	-0.604939	0.0143857	0.531386	-0.878362	-1.12853	1.72722	-0.97786	-0.591483	0.913721	1.61099	-0.336806	0.577354	0.136976	5	-54.0391	22.4036	0	C1964
1966	1.69629	-0.0805509	-0.389509	0.195221	0.213445	-0.201069	0.0215187	-0.164161	-0.119343	-1.06249	-0.185967	-0.245896	0.672929	27	-16.1999	-68.1208	0	C1965
1967	0.786474	0.772081	-0.482894	-0.205085	1.21241	-0.416002	0.592018	-0.143774	0.12676	-0.722545	-0.530617	-0.564095	-0.0551172	19	25.8491	12.0694	0	C1966
1968	-0.303228	0.177447	0.599209	-0.585937	-0.660522	1.77397	-0.599621	-1.83085	1.23605	2.02076	-1.44288	0.912092	0.349832	6	-68.0612	20.1405	0	C1967
1969	-1.30625	-0.504897	0.901542	-0.0239278	-0.935056	-0.01023	0.397284	2.08537	0.232632	0.196454	-0.5838	0.653746	-0.226093	8	46.997	-10.0543	0	C1968
1970	1.34668	-0.141994	-0.812952	-0.169177	0.26221	-0.225385	0.0842456	0.636161	-0.0968183	-0.773089	0.0456344	-0.270481	0.458942	18	-24.6754	-30.4791	0	C1969
1971	1.19331	0.384792	-0.651649	0.578096	0.906644	-0.485264	0.365799	-0.124391	0.0363323	-0.986806	-0.596453	-0.516007	0.317646	34	22.2416	-37.0079	0	C1970
1972	-0.229608	0.620904	-0.897088	0.000518	1.26694	-0.709773	0.722094	0.750497	0.341885	-0.568071	0.137209	-0.245712	-0.674693	20	-0.561338	34.162	0	C1971
1973	0.973894	0.320988	-0.695205	-0.169162	0.853051	-0.590956	0.308869	0.485789	-0.0614524	-0.843905	-0.106991	-0.327819	0.186716	31	-3.75002	-9.37699	0	C1972
1974	1.53029	-0.154364	-0.635394	0.200626	0.185221	-0.231582	0.11785	0.563688	-0.249647	-0.90744	-0.417303	-0.19113	0.553082	27	-10.3073	-65.6664	0	C1973
1975	0.900346	0.565869	-0.650201	-0.382018	0.953167	-0.683886	0.415751	0.243584	-0.0635219	-0.823388	0.324533	-0.383794	-0.047567	12	1.90232	0.695397	0	C1974
1976	-0.802973	0.267629	2.24298	0.471833	-0.539722	0.385566	-0.555504	-0.153582	-0.130346	0.385583	-0.578368	-0.0223302	-0.162206	3	-60.2404	7.45923	0	C1975
1977	0.98845	0.0719922	-0.59932	0.248804	0.679888	-0.51878	0.421515	0.406013	-0.0120917	-0.851939	-0.228547	-0.252574	-0.0605917	24	14.6648	-19.2749	0	C1976
1978	0.501819	0.228888	-0.720408	-0.507731	0.79685	-0.375581	0.387457	0.288153	0.36879	-0.560655	0.362743	-0.23398	-0.255155	21	-15.0356	12.017	0	C1977
1979	1.21088	0.207665	-0.506754	-0.175988	0.599238	-0.451309	0.00310628	0.828613	-0.314178	-0.674026	0.11913	-0.670773	0.149007	37	-28.087	-18.8575	0	C1978
1980	1.01476	0.528789	-0.777845	-0.194532	1.06445	-0.404349	0.392596	0.203196	-0.0454576	-0.847118	-0.275914	-0.445954	0.17284	24	27.6404	-16.0699	0	C1979
1981	1.49502	-0.422927	0.287602	0.0175121	-1.1115	-0.264792	-0.376854	0.589295	-0.403993	-0.111329	0.513705	-0.182721	0.455585	30	-24.3819	32.4712	0	C1980
1982	-0.449592	0.0406123	0.316162	-0.725742	-1.23479	1.90304	-1.28022	-1.52618	-0.682314	1.52785	3.04366	0.478383	0.482561	30	-34.4113	39.6124	0	C1981
1983	-1.49957	-0.193747	3.04753	0.0854623	-0.489821	-0.802524	0.432466	-0.846711	1.51079	-0.620499	-0.87215	1.18115	0.306358	35	5.79824	-83.8557	0	C1982
1984	1.71289	-0.378889	-0.352779	0.158931	0.184012	-0.179188	0.018023	0.0770089	-0.293937	-0.788154	0.0300622	-0.414419	0.547547	28	-35.9366	-48.2322	0	C1983
1985	-1.37402	-0.0837644	0.516647	-0.297072	-0.730977	0.0546609	0.441421	2.05419	0.278152	0.613309	-1.11778	0.639834	-0.0590163	13	45.3239	-22.7736	0	C1984
1986	-0.972442	0.72528	0.250802	-0.806249	1.13624	0.261154	0.170892	-2.06323	-0.145023	0.777092	2.67503	-0.0352811	-0.733448	10	26.162	59.1308	0	C1985
1987	-0.439073	0.309413	0.217877	-1.01304	-1.14971	1.98503	-1.56138	-1.20142	0.492336	1.27156	1.87607	0.304502	0.328587	5	-44.1337	26.584	0	C1986
1988	1.66057	-0.0246053	-0.911905	0.0473713	0.39094	-0.281923	0.257005	0.357297	-0.200992	-0.839812	-0.194175	-0.381455	0.551173	11	-5.45796	-44.9382	0	C1987
1989	1.23616	0.449273	-0.497772	-0.13384	0.919304	-0.453054	0.318124	0.153348	-0.145787	-0.917524	-0.357288	-0.53545	0.314192	24	24.9862	-27.0239	0	C1988
1990	-1.27646	-0.551532	0.521844	0.0717155	-1.04083	0.344108	0.672757	1.7834	0.441275	0.444028	-0.976518	0.681286	-0.27705	8	52.5721	-7.68752	0	C1989
1991	-0.17371	-0.0933421	0.0801589	-0.630447	-1.13435	2.14468	-1.09541	-1.40195	-0.770334	2.26945	0.81526	0.896034	0.53715	36	-45.8267	45.1356	0	C1990
1992	1.15589	-0.482522	-0.333776	-0.309536	-0.0643755	-0.29614	0.0452298	0.63128	-0.0333472	-0.631184	0.313454	-0.0799627	0.31915	18	-34.937	-36.6797	0	C1991
1993	-1.01487	-0.588837	0.550183	-0.555006	-1.46052	0.96925	-1.06593	1.35613	-1.02272	1.77358	2.49108	0.540587	-0.214541	32	-22.7297	72.5132	0	C1992
1994	-1.191	-0.327374	3.40401	-0.243599	-0.225392	-0.578515	-0.18942	-0.491402	1.42714	-0.841348	-0.608534	0.654741	0.434489	35	8.57376	-84.3204	0	C1993
1995	-0.697248	0.988145	-0.30172	-0.764915	1.45892	0.452332	0.59364	-2.37187	0.0632039	1.00369	1.67703	0.11666	-0.780679	7	22.1696	76.7774	0	C1994
1996	-1.33792	-0.236106	3.37837	-0.271079	-0.458948	-0.647704	-0.298847	-0.0481889	1.53828	-0.556599	-0.757018	0.701121	0.259233	35	12.2501	-81.908	0	C1995
1997	1.06337	0.550811	-0.860221	-0.0240092	1.04971	-0.526648	0.500077	0.0924314	-0.0855238	-0.767825	-0.413787	-0.190444	0.0250966	24	30.343	-16.4698	0	C1996
1998	-0.792887	0.405442	-0.214353	0.678844	0.636704	0.268586	-0.170173	-0.314938	-0.709978	0.798122	0.736271	-0.116511	-0.870468	1	-7.77779	65.1955	0	C1997
[truncated: 42,142 more rows]

## Sheet: out_tsne_noTopS
Supplemental Table 4. t-SNE clustering output using original/transformed values
	CD10:CD10	CD110:CD110	CD11b:CD11b	CD123:CD123	CD19:CD19	CD3:CD3	CD34:CD34	CD38:CD38	CD4:CD4	CD45:CD45	CD45RA:CD45RA	CD49fpur:CD49fpur	CD90bio:CD90bio	clusterNum	tsne1	tsne2	label
97	1.68247	0.360476	1.13472	0.462591	0.773674	2.08936	2.81659	2.6801	2.35743	2.98477	0.987803	2.48508	3.0449	15	75.9446	22.6465	1
1564	1.30406	0.219239	0.980544	1.12931	0.907666	2.00596	2.81457	2.29974	2.31934	2.80505	0.854823	2.57275	2.73028	15	71.7435	25.5088	1
2061	3.93308	0.631513	1.28321	0.518869	0.896658	4.09686	3.14256	2.54458	2.39414	3.48924	1.17594	3.53037	5.90299	18	56.9964	44.68	1
2151	1.82572	0.339129	2.00812	0.85933	1.32255	2.58785	3.03438	1.26878	2.72017	3.45479	1.01644	2.9898	3.34791	15	82.463	29.2137	1
2155	1.82572	0.257802	1.35767	0.809313	1.20114	2.49566	3.16383	2.59208	2.71872	3.12234	0.905722	2.83656	3.28992	15	82.2655	21.9985	1
2246	1.75915	0.727454	1.54875	1.24396	1.41803	2.44231	3.07802	2.16524	2.53685	3.22728	0.681856	2.71726	2.88885	15	81.2381	25.3847	1
2297	1.86945	0.540033	1.31966	1.07898	0.855543	2.46361	3.09813	2.45977	2.60579	3.2759	0.943648	3.01665	3.08659	15	82.1484	22.8874	1
2821	1.62812	0.392201	1.40731	0.708225	0.75351	2.16396	2.96689	2.34702	2.44302	3.08838	0.995021	2.74738	2.85641	15	77.9736	24.2671	1
3288	1.77315	0.381666	0.939903	1.21559	1.17767	2.20304	2.99952	2.16653	2.50143	2.93618	0.576242	2.68322	3.33893	15	77.1741	23.9816	1
3340	1.64	0.402694	1.33882	0.885563	1.22702	2.5049	3.03818	2.77804	2.42375	3.45121	1.21278	2.87774	2.89007	15	80.133	22.1224	1
3359	2.05501	0.464754	1.60787	0.720703	1.05304	2.66843	3.21736	2.10717	2.67262	3.52088	1.20672	3.07033	3.57193	15	83.6535	25.89	1
3659	1.89143	0.485084	1.72106	0.569168	1.08219	2.54281	3.0889	1.19882	2.76002	3.4004	1.2158	2.80837	3.05899	15	81.6735	29.9263	1
4501	1.43951	0.631513	1.30018	1.46983	1.11067	2.13662	3.19629	2.75748	2.57945	3.05856	0.419213	2.58194	2.93269	15	77.4191	16.0217	1
4546	1.59988	0.485084	1.363	0.699854	0.83261	2.35451	2.88639	1.85816	2.45252	3.06702	1.13794	2.6542	3.25344	15	78.7635	27.4195	1
4597	1.83395	0.607867	1.5191	0.600517	1.1747	2.59208	3.04574	1.31226	2.46286	3.3821	1.1945	2.8968	3.09062	15	81.5819	29.841	1
4625	1.43715	0.180354	1.58635	0.457837	0.836458	2.00745	2.50857	1.57954	2.56854	3.02564	0.936147	2.49963	2.70776	15	77.0134	30.3094	1
4822	1.86309	0.766914	1.5306	0.925821	0.943739	2.52943	2.91558	2.75174	2.50233	3.32838	1.05825	2.79565	3.22222	15	82.199	22.8808	1
4912	1.65758	0.554769	1.68992	1.34846	1.15675	2.34379	3.05057	2.78434	2.51841	3.28907	0.743098	2.84877	3.01394	15	78.7139	16.0123	1
5190	1.69938	0.474942	1.17594	0.375575	1.14158	2.33838	3.08425	0.96883	2.50413	3.19025	0.890255	2.88762	3.15387	15	81.0798	30.6324	1
5410	4.85251	0.554769	1.56439	1.00633	0.805394	4.94073	3.26472	2.65821	2.54379	3.89581	0.962223	4.17454	6.87523	18	56.1969	46.4812	1
5466	1.7215	0.691546	1.22182	0.761607	0.828753	2.26658	2.81929	2.59881	2.39213	3.30664	0.936147	2.76071	2.90347	15	77.8482	24.1371	1
5840	1.72333	0.444243	1.06849	0.836458	1.18653	2.49566	3.06122	2.41153	2.56685	3.29202	0.995021	2.87712	3.27415	15	82.2256	22.4324	1
6243	1.89608	0.30683	1.83379	0.785647	1.0299	2.43446	2.82667	1.54541	2.59845	3.32757	1.17594	2.77525	3.0881	15	81.8579	29.1959	1
6527	1.7031	0.349821	1.44747	0.560116	1.20114	2.48165	3.33	1.62345	3.04542	3.34209	0.984178	2.97244	3.0657	15	81.414	28.6603	1
6747	1.56879	0.444243	1.266	0.653049	0.904007	2.25724	2.77453	2.01044	2.45157	3.06492	1.46461	2.61952	2.96791	15	78.3455	26.7645	1
6830	1.60803	0.464754	1.42001	1.11692	1.21845	2.34486	3.29622	2.02671	2.83462	3.14695	0.846829	2.98144	3.30301	15	82.6312	25.3058	1
6993	1.46291	0.32302	1.40986	0.801465	1.27439	2.25135	2.78154	2.40038	2.52018	2.98248	1.02351	2.5861	2.78958	15	75.688	24.7245	1
7025	1.66338	0.371091	1.18216	0.591613	1.05957	2.18809	3.11784	1.93788	2.52106	2.98018	0.734489	2.84621	3.20668	15	79.1069	27.0558	1
7088	1.90838	0.407925	1.42506	0.448299	1.18653	2.58955	3.01127	2.70982	2.43439	3.36972	1.15709	2.93386	3.19815	15	81.647	21.3213	1
7162	1.4132	0.444243	1.56217	0.523493	0.805394	2.31093	3.1357	1.96471	2.83268	3.27633	1.19757	2.73315	2.83785	15	79.8968	26.9233	1
7397	1.87104	0.433921	1.46945	0.785647	1.26066	2.39936	2.87816	2.74813	2.47865	3.1017	1.32242	2.83138	3.30707	15	81.707	20.8831	1
7607	1.50604	0.349821	1.28606	0.424288	0.555575	2.20427	2.70756	1.49092	2.04398	3.13226	0.882457	2.47496	2.90166	15	77.0053	30.264	1
7983	1.53244	0.691546	1.49809	0.992678	1.28256	2.28272	2.91129	1.92339	2.58361	3.0858	0.905722	2.79902	2.94088	15	80.6819	25.8625	1
8014	1.77141	0.433921	0.991417	0.75351	0.975405	2.29974	3.05377	2.78712	2.54206	3.12731	0.980544	2.78822	3.15811	15	79.9058	20.3968	1
8084	1.12003	0.454521	1.42506	1.01311	0.613794	2.2907	2.71804	1.48605	2.28426	3.01627	0.712764	2.52459	2.75091	15	75.9248	31.0665	1
8389	1.4132	0.407925	1.66191	0.429109	1.15675	2.16396	2.95283	1.39986	2.86021	3.22053	1.31966	2.73028	2.87276	15	80.2279	31.0917	1
8765	2.96534	0.257802	1.63315	0.47207	0.708225	3.34128	2.64067	1.07356	2.30305	3.11984	0.743098	2.68922	5.05961	18	56.6016	43.1109	1
8908	1.59579	0.549869	1.32791	1.08219	0.578178	2.15751	2.50766	2.49288	2.1548	2.99726	1.08202	2.40707	3.0391	15	73.6852	26.2056	1
8983	4.86485	0.402694	1.59931	0.971923	0.840295	4.93829	3.34168	1.69221	2.64015	3.87768	0.87068	4.21702	6.88368	18	55.7002	46.534	1
9025	1.88676	0.583915	1.8627	1.05304	1.01985	2.63422	2.99557	2.2347	2.70408	3.1643	1.23376	2.9747	3.34752	15	83.5904	25.3883	1
9199	1.39859	0.579088	1.44253	1.47213	1.37631	2.32859	2.91374	2.56124	2.71143	3.15566	0.87068	2.79431	3.24745	15	78.343	16.6603	1
9416	2.06162	0.454521	1.60574	0.769662	1.17173	2.55688	2.81862	2.24187	2.30524	3.38133	1.19757	2.72668	3.56194	15	82.6024	23.3345	1
9474	1.43951	0.268753	1.5191	0.840295	1.26066	2.28043	3.05591	2.10036	2.65497	3.25298	1.08538	2.83397	2.92679	15	80.6071	25.8591	1
9591	1.40835	0.598323	1.26888	1.07577	0.793577	2.03694	2.44036	2.11797	2.12266	2.94751	0.83879	2.42956	2.85578	15	72.9839	26.7977	1
9769	1.20983	0.268753	0.585672	0.855543	0.907666	2.17546	2.68627	2.25017	2.20423	3.13865	0.965908	2.36364	2.66652	15	71.1227	26.3136	1
10267	1.48355	0.333768	1.42757	1.43002	1.24115	2.31869	2.9119	2.64228	2.51219	3.20825	0.822579	2.63306	2.85196	15	77.8628	16.4677	1
10351	2.80419	0.469854	1.85428	0.604953	0.95084	3.13226	2.89016	2.54987	2.39813	3.12979	0.830707	3.06261	4.74534	18	57.5227	43.1672	1
10509	1.32255	0.535096	1.20976	1.38378	1.27439	2.12066	3.33485	2.04129	2.76211	2.97731	0.777068	2.78822	2.85768	15	76.6629	17.6864	1
10670	1.67868	0.718551	1.59501	0.896658	1.33558	2.44329	3.24947	2.31869	2.77936	3.24507	0.913391	3.07748	3.28455	15	83.2044	25.2404	1
10754	1.68437	0.650207	1.65173	0.889271	1.20405	2.43938	3.10879	2.68396	2.73744	3.24066	1.21882	2.79767	3.10656	15	81.4687	23.2697	1
10949	3.79701	0.705104	1.73819	1.09809	1.76618	3.9533	3.37709	2.39527	2.78754	3.49028	1.12826	3.63018	5.74174	18	56.9183	44.6217	1
10961	1.42763	0.0169992	1.10205	0.665942	0.578178	2.28615	2.7225	2.22506	2.12266	3.37709	1.0129	2.59681	2.81895	15	73.8612	25.5657	1
11296	1.45594	0.459643	1.38927	0.564647	1.12622	2.126	2.86923	2.48165	2.46193	3.12929	0.943648	2.61631	2.79633	15	75.1095	24.5478	1
11334	1.44188	0.454521	1.77163	0.922209	1.26617	2.47314	3.32023	1.77936	2.83397	3.45085	1.01998	3.00523	2.95593	15	82.4655	27.713	1
11474	1.38874	0.525188	0.734489	0.881845	0.769662	2.12734	2.824	2.46648	2.31719	3.18978	1.09873	2.65729	2.74313	15	72.7166	23.6191	1
11508	1.39859	0.423555	1.43008	1.13239	1.00633	1.99542	2.98876	2.58105	2.46286	2.78712	0.87068	2.65342	2.94901	15	76.4865	19.384	1
11602	1.31202	0.520217	1.25438	1.46059	1.27166	2.3373	2.87816	2.47124	2.30742	3.02947	0.755923	2.66652	2.80837	15	77.5026	16.5772	1
11603	1.81407	0.75387	1.15074	0.433921	1.0299	2.36828	3.02947	2.75029	2.51219	3.2823	1.27176	2.84301	3.11248	15	80.85	20.9933	1
11615	1.67678	0.612621	1.09541	0.728968	0.9366	2.40445	2.91803	2.36194	2.25483	3.20916	1.13472	2.73028	3.06416	15	77.8606	24.6578	1
11750	2.27094	0.796927	2.03121	1.18063	1.68625	2.80709	3.54373	2.45108	3.03486	3.48924	1.64968	3.31191	3.87684	15	84.3711	26.181	1
11959	1.94739	0.65485	1.74759	1.03323	0.817119	2.48915	2.76106	2.70832	2.74455	3.16955	1.09541	2.7628	3.53393	15	82.8356	23.0364	1
11960	1.53678	0.407925	0.969582	1.05957	1.03987	2.18053	3.10119	2.67	2.70112	3.05591	0.814407	2.82877	2.92146	15	75.7819	18.8871	1
12001	5.23422	0.714081	1.57762	1.6498	1.44893	5.32324	3.79867	2.79475	3.05951	4.13855	1.04793	4.57549	7.24633	18	55.7784	47.7974	1
12193	1.69377	0.413146	0.928603	0.878117	0.541888	2.20304	2.81727	2.20056	2.1459	2.91619	1.84237	2.4694	3.22749	15	78.3032	26.3271	1
12410	1.52809	0.423555	1.54875	1.54541	1.04976	2.00895	2.75246	2.62119	2.31394	2.82265	0.699588	2.48874	2.87898	15	77.3409	16.1953	1
12562	1.75386	0.428743	1.49574	1.00633	0.982341	2.49566	2.86215	2.122	2.48965	3.18978	0.969582	2.81763	3.36065	15	82.3166	23.4297	1
12563	1.79551	0.252314	1.50748	0.657357	0.878117	2.37874	2.83334	1.6213	2.51752	3.12582	0.93238	2.52195	3.37058	15	79.3108	28.2363	1
12645	2.10678	0.407925	2.12266	0.728968	1.28527	2.5699	3.29202	1.48605	2.94495	3.24463	1.18835	3.13914	3.68772	15	83.2832	28.4208	1
12650	1.29067	0.30683	1.47428	0.761607	0.419458	2.07265	2.67156	2.07685	2.29645	2.95989	0.901871	2.43727	2.71945	15	73.0293	27.7474	1
12941	1.80061	0.540033	1.60146	0.863108	1.04976	2.58105	3.07594	1.89379	2.62352	3.50059	1.14436	2.92561	3.11933	15	81.9992	27.8733	1
13067	1.7215	0.407925	1.52601	0.591613	1.09493	2.52943	3.06439	0.682446	2.6472	3.45658	0.854823	2.80637	3.18726	15	81.4667	30.5832	1
13172	1.25234	0.301415	1.61425	0.781666	0.817119	1.96471	2.50857	1.95532	1.96947	2.85697	1.06167	2.41003	2.84557	15	73.3826	27.4893	1
13309	1.62613	0.622092	1.85428	1.1507	1.56879	2.28387	3.39851	1.9054	2.89313	3.13077	1.06849	3.13242	3.20668	15	83.0204	26.6422	1
13431	1.54541	0.413146	1.58635	0.674484	0.943739	2.35451	2.91619	1.83372	2.67642	3.31449	1.20063	2.65574	2.81301	15	79.8434	27.1341	1
13573	1.77489	0.328399	1.62059	0.87438	1.04976	2.51406	3.26602	1.44632	2.88823	3.30954	1.041	3.09862	3.41262	15	82.3768	29.1305	1
13648	1.48355	0.202611	1.31966	0.836458	0.855543	2.2941	2.89079	2.44817	2.54551	3.1411	1.08873	2.83721	2.85957	15	78.2284	23.539	1
13810	1.35867	0.397453	1.58852	0.467335	0.560116	1.97093	2.64389	1.19882	2.40212	3.1278	0.834754	2.60009	2.71289	15	77.1274	30.9709	1
13985	1.47213	0.30683	0.947384	0.674484	0.85933	2.48821	2.87498	1.08048	2.68096	3.22548	0.810303	2.76141	3.00249	15	79.2098	30.4732	1
14115	1.5561	0.274217	1.0129	0.878117	0.947294	2.40648	3.33081	2.07685	2.82877	3.23844	0.991417	2.93972	3.34985	15	82.2371	25.0915	1
14143	1.69002	0.263281	1.40731	1.12313	1.05631	2.47598	2.85568	2.71282	2.51575	3.07175	1.23079	2.68922	2.90347	15	79.7261	20.8838	1
14404	1.40835	0.612621	1.5306	0.537305	0.989241	2.16396	3.05484	1.47378	2.63622	3.20825	0.866732	2.83915	2.93621	15	79.8015	30.2273	1
14506	1.64589	0.549869	1.11849	0.863108	0.947294	2.24068	2.7365	2.6855	2.29425	2.87179	0.89801	2.32686	3.04068	15	76.5217	20.9993	1
14572	1.65564	0.530148	1.99342	0.300905	1.29604	2.54458	3.22593	2.04418	2.97188	3.3951	1.26888	3.06313	3.21026	15	83.2947	27.6049	1
14784	1.29872	0.274217	1.25145	1.31466	0.797526	2.20056	2.78085	2.43839	2.26738	3.00345	0.83879	2.66038	2.96961	15	76.6854	21.6463	1
14830	2.66541	0.687003	1.87272	0.885563	1.14463	3.02838	3.05537	1.36508	2.53772	3.27076	1.33882	2.86273	4.8192	18	56.7165	43.1025	1
15032	2.83485	0.158008	1.551	0.708225	1.12931	3.02069	3.14841	0.919047	2.7495	3.59881	0.9769	3.31914	5.03587	18	56.6457	43.1804	1
15051	1.62013	0.626808	1.44501	0.390283	1.26066	2.16653	3.02454	1.92663	2.51486	3.16239	1.04793	2.82289	3.21515	15	79.7436	27.367	1
16015	1.27439	0.559657	1.23376	0.76564	0.933016	2.24662	2.5348	2.47124	2.14845	2.98591	0.789617	2.39012	2.76002	15	72.4218	25.7286	1
16019	1.95327	0.423555	1.52601	0.59607	1.21559	2.42356	3.17239	0.965065	2.70334	3.30871	1.11522	2.94785	3.50943	15	81.8547	30.2227	1
16065	1.68437	0.603101	1.41241	0.749446	1.06283	2.42654	2.94156	1.55691	2.63543	3.34488	0.962223	2.93034	3.14725	15	80.857	29.4134	1
16089	1.78181	0.607867	1.81289	0.733085	0.957905	2.42555	2.98933	1.56375	2.70776	3.27033	1.11194	2.87089	3.26659	15	81.9594	29.152	1
16506	1.51932	0.530148	1.33611	0.687217	0.618198	2.03548	2.72768	2.45011	2.25598	3.02014	0.947384	2.62989	2.80036	15	75.0948	24.7621	1
16688	1.59784	0.317632	1.55548	0.785647	0.982341	2.25135	2.76177	1.63415	2.62272	3.09044	1.041	2.68472	2.95132	15	78.9124	28.5094	1
16700	1.75739	0.290561	0.87068	1.11067	1.12622	2.44622	2.6901	2.24781	2.44492	3.17571	0.83879	2.67034	3.08659	15	77.028	24.0678	1
16932	1.54326	0.544957	1.10865	0.678739	1.40104	2.19808	2.75102	1.753	2.3657	3.14159	0.681856	2.59681	2.83592	15	77.6878	28.659	1
17114	1.67488	0.691546	1.8076	0.805394	1.04317	2.45785	3.09915	1.37589	2.85323	3.15807	1.18216	2.98535	3.4484	15	82.291	29.1622	1
17122	1.61409	0.371091	1.69779	0.514235	1.35867	2.44622	3.36894	2.37874	2.93738	3.39244	1.52141	3.03007	3.27038	15	81.5614	24.1028	1
17124	1.53027	0.593533	1.62479	0.805394	0.745372	2.35237	2.71581	2.76462	2.36981	3.12979	0.939903	2.60985	2.84429	15	77.3886	22.7264	1
17276	1.92356	0.714081	1.16341	0.985795	1.45127	2.5742	3.26126	1.99542	2.87836	3.37283	1.08873	3.07237	3.36487	15	82.9281	25.0512	1
17445	1.54756	0.480019	1.05138	1.24955	1.04647	2.0485	2.9014	2.68627	2.44302	2.9634	0.814407	2.60985	2.84941	15	76.1856	19.0741	1
17540	1.72333	0.428743	1.60574	0.785647	0.695652	2.42455	3.19536	1.49576	2.67414	3.31737	1.16025	3.02042	2.96393	15	81.6866	29.319	1
18133	1.79551	0.32302	1.46945	1.29604	1.21559	2.27237	3.21236	1.56375	2.7274	3.18465	1.15392	2.9519	3.35873	15	82.7312	28.8026	1
18187	1.52152	0.622092	1.355	0.728968	1.30937	2.26075	3.12184	1.54078	2.45346	3.17854	0.818499	2.94843	2.93269	15	79.8673	29.6218	1
18246	1.54326	0.339129	1.23673	1.02321	0.900337	2.42853	3.05217	2.52763	2.45629	3.12234	0.924816	2.7635	3.0274	15	77.8849	22.6674	1
18281	1.68247	0.668704	1.44501	0.395168	0.749446	2.51769	3.03492	2.68857	2.81566	3.43126	1.041	2.92443	3.07084	15	80.7139	23.043	1
18303	1.63408	0.219239	1.4573	0.50027	0.781666	2.14712	2.59797	2.65505	2.0052	2.94335	0.818499	2.47032	3.18635	15	75.8553	22.8168	1
18561	5.20007	0.745113	1.73061	0.618198	1.13546	5.23826	3.6019	1.28053	3.05847	4.11885	1.07528	4.49469	7.20555	18	55.0592	47.2065	1
18598	1.55184	0.301415	1.11849	0.821007	1.18063	2.13265	3.21418	2.5049	2.7209	3.03981	0.928603	2.84236	3.16045	15	79.3917	21.3397	1
18691	1.58341	0.490138	1.82687	0.777675	1.19823	2.44817	3.05057	1.7415	2.82942	3.47427	1.07528	2.88946	2.93621	15	82.2683	27.9724	1
18743	1.5259	0.423555	1.40475	0.769662	1.06931	2.13925	2.86537	2.14057	2.49329	3.00513	0.87068	2.64642	2.9071	15	77.389	25.9567	1
18774	1.59988	0.365788	1.05825	1.08857	0.704045	2.2371	2.73503	2.40648	2.33007	2.94395	0.822579	2.52106	3.16232	15	76.6686	21.7272	1
18859	1.24396	0.428743	1.08202	0.855543	0.821007	2.04274	2.56037	2.62935	2.25253	2.87371	0.973246	2.35013	2.64798	15	70.5328	24.5658	1
18892	1.90685	0.682446	1.3683	0.720703	1.10125	2.63098	2.90326	2.46743	2.55752	3.33243	0.91721	2.76558	3.56382	15	82.5283	22.8925	1
18893	1.70124	0.219239	1.89247	0.670218	1.32517	2.53033	3.18839	1.25691	2.35326	3.40642	1.363	3.03114	3.17948	15	82.2696	29.4757	1
18922	2.35158	0.096185	1.33611	0.682983	1.1138	2.90202	3.15422	1.00956	2.82158	3.0858	1.09541	3.00851	4.19108	15	82.3419	30.1994	1
19216	1.35612	0.474942	1.27176	0.85933	1.08538	2.24662	3.01959	2.61543	2.41593	2.98534	0.734489	2.63779	2.94263	15	76.5926	20.2312	1
19383	1.58341	0.0679477	1.06849	0.940174	1.08219	2.05566	2.53302	2.76533	2.06629	2.87753	1.041	2.37084	2.79498	15	69.1165	23.0765	1
19444	2.94344	0.603101	1.28036	1.29067	1.6498	3.30623	3.53187	2.07965	2.76141	3.35006	1.24264	3.44735	4.95647	18	57.1336	43.3563	1
19487	1.57925	0.645552	1.37883	0.840295	1.25234	2.33404	2.9698	2.26541	2.56685	3.30706	1.03752	2.80504	3.07033	15	80.9743	24.7204	1
19531	1.34333	0.433921	0.954824	0.75351	0.537305	2.05566	2.32968	2.0935	1.9006	2.91741	1.07189	2.32579	2.70923	15	72.6575	28.4265	1
19584	1.40592	0.622092	1.42001	1.25789	1.44188	2.04562	3.02399	2.6326	2.50593	3.02674	1.00578	2.81169	3.01827	15	77.9825	16.8817	1
19617	1.50827	0.525188	1.09873	0.964932	0.961423	2.34916	2.88576	2.1601	2.27529	3.1357	0.91721	2.77868	3.23882	15	77.5637	24.9245	1
19754	1.78008	0.224769	1.5465	0.943739	1.16576	2.5186	2.9481	1.82307	2.54292	3.34048	1.06167	2.79834	3.4064	15	81.6854	28.0602	1
19935	4.71123	0.631513	1.97098	0.631347	1.51712	4.84158	3.68456	2.52674	2.97695	3.99065	1.44501	4.1385	6.71231	18	56.0714	46.5799	1
20086	1.67106	0.381666	1.47187	0.789617	1.05304	2.38082	2.91864	2.33622	2.36467	3.28315	1.11194	2.69964	3.06416	15	79.9988	24.2758	1
20327	1.54756	0.0113331	1.041	0.824885	0.325995	2.34163	2.82467	2.27006	2.47403	3.07228	1.05138	2.78482	3.2594	15	76.7947	24.5754	1
20441	1.7378	0.464754	2.14718	1.08857	1.26066	2.66373	3.06808	2.07405	2.68697	3.4217	1.23673	2.87089	3.04227	15	83.1741	26.7596	1
20479	1.92356	0.691546	2.151	0.682983	1.22702	2.61873	3.28654	1.83019	3.0881	3.49132	1.05138	3.13194	3.54612	15	83.6376	27.5527	1
20493	1.80061	0.274217	1.34963	0.793577	0.851746	2.31759	2.72842	2.07965	2.66957	3.06016	0.980544	2.6749	3.20399	15	78.6021	26.6449	1
20623	1.48355	0.535096	1.71914	0.64006	1.1507	2.39936	3.06386	2.15363	2.54724	3.29412	1.20976	2.80504	3.19634	15	81.1048	24.5697	1
20701	1.35102	0.152409	1.14116	0.824885	0.657357	2.31093	2.3373	2.38082	1.88593	3.06016	0.991417	2.34384	2.67262	15	73.16	26.8886	1
20867	1.5127	0.191494	1.42757	0.866875	0.670218	2.27006	2.51769	2.24662	1.98749	3.11834	0.772862	2.48233	2.86587	15	73.4628	26.5455	1
20969	1.39367	0.349821	1.53516	1.10125	0.793577	2.27928	2.93077	2.79475	2.53074	3.05003	1.04447	2.65265	2.82551	15	77.4598	22.1061	1
21153	1.86627	0.285121	1.7268	1.08538	1.21845	2.66451	3.27076	2.3209	2.84108	3.51045	1.25438	3.00523	3.37399	15	83.6805	25.5046	1
21265	1.56246	0.682446	2.13435	0.83261	1.16576	2.37561	3.29118	1.74535	2.93269	3.23533	1.10205	3.09713	3.08103	15	82.9916	27.8917	1
21349	1.61409	0.510237	1.06509	0.749446	1.01649	2.20797	3.13324	1.13449	2.54896	3.05431	0.93238	2.71945	2.91131	15	79.1217	30.6251	1
21477	1.51049	0.444243	1.39445	1.23552	0.95084	2.03839	2.86151	2.06702	2.61308	2.89954	0.958529	2.52195	2.91251	15	77.0356	26.1388	1
21653	1.80399	0.386939	1.83551	0.250182	0.892969	2.45398	2.83666	2.6179	2.49963	3.22323	1.17282	2.86713	3.27457	15	79.2504	24.2392	1
21901	4.28626	0.564533	2.0759	0.537305	1.15373	4.34012	3.35836	1.43616	2.94843	3.60314	1.06167	3.85576	6.23917	18	56.1058	45.242	1
22100	1.67488	0.544957	1.96643	0.708225	0.728968	2.24068	2.74885	1.69221	2.41593	3.16669	1.2158	2.68997	3.12759	15	78.7624	27.9276	1
22245	1.59579	0.515233	1.42757	0.885563	0.975405	2.47409	3.01903	1.67389	2.33432	3.21008	0.947384	2.77112	3.03486	15	79.433	28.5592	1
22551	1.92957	0.402694	1.76613	1.12931	1.37129	2.52403	3.37632	1.63628	2.68997	3.25298	1.18216	3.09162	3.58766	15	82.9522	28.6873	1
22592	1.27712	0.252314	1.20672	0.918588	1.01985	2.0223	2.42754	2.78294	1.8199	2.80025	0.469494	2.30851	2.8037	15	68.7899	23.3301	1
22646	1.27166	0.241318	1.17282	0.560116	0.712395	2.22385	2.66765	2.70756	2.01104	3.06122	0.439452	2.56854	2.81434	15	68.835	23.8918	1
22758	1.61409	0.554769	1.59285	0.682983	1.21559	2.39116	2.84588	0.75387	2.38912	3.22233	0.913391	2.73243	3.26068	15	81.4443	30.5945	1
22922	1.82902	0.371091	1.551	0.635709	0.769662	2.57592	3.0511	1.22363	2.22808	3.34488	0.924816	2.74455	3.46927	15	81.6936	30.2182	1
23102	1.6498	0.515233	0.991417	1.67868	1.09175	2.25724	3.1283	2.60799	2.64015	2.98248	1.4573	2.74171	3.09563	15	76.3774	15.7595	1
23112	1.5497	0.333768	1.69387	0.380486	1.18063	2.49752	3.02014	1.22975	2.83915	3.38056	0.984178	2.81632	2.87026	15	80.7318	30.8966	1
23224	1.8124	0.709599	1.266	0.911316	1.29872	2.4807	3.21099	1.96471	2.88269	3.27633	0.89801	3.0134	3.49979	15	82.8473	25.1386	1
23225	3.54657	0.579088	1.70171	0.350888	1.12931	3.79587	3.15759	1.20507	2.90226	3.61753	1.06167	3.36142	5.47827	18	56.5205	43.8108	1
23251	1.40348	0.169192	1.16969	1.00633	0.918588	2.18305	2.47598	2.58701	2.17734	2.99726	0.747384	2.4041	3.15528	15	76.3506	21.6342	1
23255	1.8742	0.30683	1.23079	0.870632	1.29067	2.66843	3.13718	2.61213	2.56092	3.59228	1.03752	3.05899	3.29115	15	82.4001	21.8639	1
23415	1.26342	0.402694	1.47908	1.23269	1.00633	2.03111	2.58785	2.03257	2.09352	2.91374	0.882457	2.39614	2.88762	15	73.0356	26.7868	1
23423	1.61409	0.24682	1.51447	1.14463	0.855543	2.33622	2.68087	1.93307	2.46286	3.05803	0.886362	2.6283	3.05223	15	78.0677	27.0777	1
23506	2.04433	0.386939	1.52371	1.08857	1.49485	2.41354	3.26861	2.78434	2.741	3.06174	1.23079	3.02633	3.51009	15	83.5807	21.3719	1
23574	1.42524	0.549869	1.54198	1.33039	0.821007	2.2092	2.85503	1.56375	2.65187	3.10829	1.21278	2.59845	2.80237	15	78.5805	29.2939	1
23710	1.67678	0.392201	1.23079	0.704045	1.28256	2.08382	2.98477	2.47976	2.73387	2.95401	1.06849	2.75862	3.05327	15	79.3966	21.431	1
23836	1.11067	0.235809	0.980544	0.47207	0.821007	2.00745	2.68857	2.03548	2.44111	2.975	0.874616	2.4942	2.72668	15	73.2311	28.4898	1
23853	1.7031	0.520217	1.17906	0.947294	1.01311	2.18053	3.02893	2.79819	2.62512	2.9916	0.93238	2.67869	3.02258	15	79.0273	20.4195	1
23867	1.86945	0.328399	1.69975	0.716554	0.911316	2.49008	3.20504	1.56602	2.88577	3.45586	1.35232	2.93504	3.14058	15	82.1462	29.0558	1
23883	1.86627	0.257802	1.42254	0.724841	1.06931	2.48447	3.00289	1.41556	2.59681	3.22458	0.785445	2.90044	3.5809	15	81.7939	30.0447	1
23898	1.90685	0.700597	1.83551	0.64006	1.18946	2.69316	3.25473	2.14842	2.84941	3.44255	0.951109	3.13483	3.51009	15	83.697	26.2047	1
23993	1.42524	0.152409	1.20368	1.42763	1.1747	2.42654	3.04466	2.69621	2.75302	3.04842	0.585672	2.75372	2.97976	15	77.9804	16.3778	1
24089	1.55822	0.50523	1.39186	1.20405	0.892969	2.30311	2.65266	2.72473	2.34279	2.89204	0.958529	2.53074	3.05483	15	76.667	21.1832	1
24307	1.48127	0.402694	0.743098	0.821007	0.653049	2.11663	2.48259	2.72694	2.14078	3.01183	0.969582	2.26625	2.67338	15	70.6341	24.3043	1
24339	1.73059	0.386939	1.61213	1.06607	1.16875	2.52132	3.00289	2.42654	2.5541	3.46014	1.11194	2.87151	2.9792	15	81.4522	23.4915	1
24472	1.29872	0.525188	1.25729	1.00973	0.940174	1.94107	2.76106	2.42356	2.22217	2.99046	1.12826	2.49873	2.68922	15	72.1863	25.3664	1
24561	1.66914	0.295992	1.17282	0.95084	0.929423	2.1445	3.06913	1.50779	2.63385	2.94097	0.618309	2.80437	3.22793	15	79.1978	27.6167	1
24619	1.64197	0.569396	1.80228	0.785647	1.18063	2.13793	3.06492	1.95375	2.92265	3.33647	1.26888	2.94321	3.18269	15	82.5629	27.6439	1
24701	1.57089	0.096185	1.70561	0.749446	0.918588	2.56298	3.13423	1.91688	2.53162	3.29118	0.850831	2.77662	3.17302	15	80.8157	27.6453	1
24717	1.40835	0.407925	1.18216	0.6444	0.892969	1.99995	2.61296	1.30082	2.17362	3.03655	1.05825	2.41102	2.8974	15	76.9605	30.4091	1
24961	1.50381	0.407925	1.17906	0.878117	0.75351	2.15881	2.95283	2.77944	2.07999	2.90388	0.717132	2.65265	2.94321	15	76.997	20.3539	1
24965	1.74318	0.423555	1.8286	0.801465	1.47442	2.69621	3.10626	1.52676	2.7821	3.52021	1.18835	3.02633	3.0693	15	82.6707	28.4523	1
25025	1.69564	0.480019	1.551	0.889271	1.03655	2.28043	3.08684	1.21439	2.46474	3.43965	0.89801	2.75372	3.0014	15	81.1616	30.1084	1
25061	1.57299	0.360476	1.30298	0.821007	0.828753	2.44036	2.64228	2.77944	2.18474	3.29622	1.17594	2.72307	2.83915	15	75.6127	22.7079	1
25172	1.56458	0.454521	1.34424	0.95084	1.09493	2.3373	3.07123	2.23949	2.72596	3.37361	1.04793	2.8621	2.88946	15	80.7158	24.9412	1
25259	1.76443	0.510237	1.48387	0.840295	1.16276	2.56385	2.89079	2.50949	2.54292	3.39053	1.00934	2.74029	3.21159	15	82.0164	23.0322	1
25296	1.76443	0.687003	1.59285	0.355843	1.04317	2.45302	3.05484	2.4854	2.6989	3.27974	0.810303	2.9321	3.01231	15	80.8598	23.2443	1
25387	1.87578	0.50523	1.35767	1.08538	0.971923	2.37874	2.86344	2.25135	2.47496	3.25865	1.09208	2.8242	3.3026	15	82.3069	23.1804	1
25596	1.80904	0.579088	1.551	0.961423	1.0299	2.56385	2.83268	2.39732	2.36776	3.27376	1.3683	2.82092	3.38828	15	82.4381	23.2394	1
25647	1.18653	0.141197	1.41241	0.896658	0.518869	1.96003	2.53837	1.78862	2.08948	2.97038	0.721489	2.33326	2.63779	15	72.9725	28.9329	1
25697	2.36246	0.544957	1.98451	0.978877	1.19823	2.71506	3.08425	2.10988	2.8665	3.44761	1.30857	2.97188	4.00042	15	83.9838	26.0647	1
25760	1.49035	0.530148	1.78255	0.604953	0.847939	2.38082	3.00737	2.59545	2.79633	3.40228	1.34154	2.78005	2.8385	15	79.94	23.4602	1
25769	1.93703	0.75823	1.59285	1.50158	1.31466	2.77029	3.28907	2.29184	2.70776	3.50909	1.38667	3.07798	3.34869	15	83.8774	25.5015	1
25825	1.5411	0.328399	0.984178	1.22417	0.87438	2.46457	3.03438	2.05851	2.42472	3.21554	0.814407	2.67718	2.9992	15	77.0676	24.2979	1
26030	1.45127	0.30683	1.7268	0.609379	0.582667	2.22021	2.93077	2.55075	2.31827	3.05431	1.12176	2.59106	3.03592	15	78.3122	24.2252	1
26055	1.42044	0.423555	1.84066	0.665942	0.896658	2.30311	2.58446	2.07124	2.11347	3.13226	1.00934	2.59106	2.9149	15	77.0788	26.9459	1
26112	1.64	0.392201	1.78255	0.47207	0.907666	2.3264	3.15663	2.02524	2.54982	3.37361	0.890255	2.9167	2.90589	15	80.5401	27.2142	1
26149	1.30672	0.459643	1.64763	0.453073	0.9366	2.26075	2.80573	1.43104	2.57275	2.91925	1.2158	2.68997	2.86084	15	78.7028	31.3104	1
26255	1.53462	0.444243	1.25438	0.95084	0.911316	2.3513	2.59545	2.5742	1.93716	3.00737	0.717132	2.55496	2.77043	15	75.0882	23.4022	1
26442	1.44423	0.062293	1.64763	0.761607	1.06607	2.26658	2.97904	1.72598	2.81763	3.21736	0.987803	2.90589	2.8968	15	79.8143	29.4368	1
26575	1.41562	0.58873	1.47187	1.29872	1.22986	2.25606	2.84194	2.80094	2.43439	3.00008	0.789617	2.57023	2.75372	15	77.2387	16.1826	1
26635	1.51049	0.459643	1.61	0.793577	0.773674	2.2323	2.68165	2.03984	2.3096	3.22593	0.901871	2.72812	2.86713	15	77.2082	27.0446	1
26858	1.479	0.339129	1.64968	1.45361	1.35358	2.26425	3.14646	2.6113	2.73673	3.10525	0.850831	2.84172	2.97751	15	78.2218	16.4983	1
26899	1.44893	0.285121	0.878542	1.1044	1.18653	2.06277	3.04628	2.37874	2.46474	2.98362	0.806189	2.71581	2.82812	15	75.7369	18.7021	1
26922	1.58341	0.569396	1.77163	0.380486	1.27712	2.24425	2.97846	1.3459	2.69519	3.11884	1.355	2.72524	2.83979	15	80.3502	31.1684	1
26945	1.19532	0.129967	1.25145	0.448299	0.239957	2.18431	2.5525	2.29749	2.21024	3.13816	0.672919	2.52195	3.14867	15	73.8829	26.0922	1
27016	1.29604	0.381666	1.32791	0.76564	1.09175	2.03548	2.67933	2.35664	2.45441	3.18042	0.874616	2.51219	2.66957	15	74.7157	25.1024	1
27069	1.90071	0.801166	1.97852	1.15373	1.62213	2.84719	3.26602	2.3209	2.93562	3.69419	1.4524	3.18223	3.40089	15	84.1836	26.2803	1
27120	1.42284	0.365788	0.738799	1.1507	0.781666	2.06136	2.91251	2.59461	2.31611	2.86151	0.905722	2.48049	2.71726	15	71.9242	19.6987	1
27373	1.39859	-0.0396563	1.31966	0.209139	0.375575	2.47124	2.80641	1.21747	2.46474	3.32879	0.826649	2.87338	2.95305	15	78.14	30.6344	1
27400	1.35867	0.376383	1.54198	0.989241	0.851746	2.24899	2.51679	2.2347	2.27754	2.93258	0.781262	2.4666	2.731	15	72.9442	26.769	1
27549	1.42763	0.510237	1.5306	0.745372	0.907666	2.43741	2.8673	2.01044	2.58028	3.08062	1.01998	2.62272	2.90529	15	78.1209	27.1978	1
27673	1.57089	0.376383	1.41241	0.741287	0.761607	2.3264	2.88197	2.56904	2.21622	3.1357	0.721489	2.66114	2.94205	15	77.4145	23.5569	1
27859	1.67106	0.510237	1.13149	0.940174	1.33299	2.26774	3.39623	2.10309	2.94263	3.07802	0.874616	3.09713	3.25983	15	82.5772	25.2	1
27885	1.65175	0.360476	1.53288	0.564647	0.914957	2.21166	2.87498	1.20195	2.65342	3.28527	1.2158	2.78278	3.04805	15	80.8364	30.4615	1
27890	1.74675	0.376383	1.00934	0.733085	1.32255	2.41254	3.30871	2.57934	2.74526	3.41651	0.882457	2.98647	3.31834	15	82.3596	22.0452	1
27898	1.26892	0.146805	1.96795	0.885563	0.587145	2.27122	2.75102	1.41815	2.53598	3.25298	1.00934	2.76002	2.78822	15	78.0427	31.5358	1
28009	1.71234	0.185927	1.83723	0.600517	1.33039	2.22385	3.13816	1.82307	2.67338	3.34728	1.05138	2.89436	2.93151	15	81.7637	28.0382	1
28141	1.63011	0.257802	0.874616	0.87438	0.661655	2.16909	3.01127	2.24662	2.57443	2.94037	0.89801	2.75302	3.12566	15	76.6627	24.5558	1
28194	1.68625	0.459643	1.22182	1.50604	1.48127	2.32859	3.29664	2.28843	2.65031	3.0686	0.846829	2.88084	3.43174	15	83.4794	22.1075	1
28325	1.57299	0.219239	1.45485	1.28256	0.699854	2.1601	2.69163	2.38601	2.33856	3.17901	0.995021	2.61389	2.7855	15	76.8951	22.2628	1
28462	1.56458	0.490138	1.47668	0.631347	0.573678	2.27468	2.69621	2.34379	2.25713	3.32554	0.939903	2.60985	3.111	15	77.9002	24.6859	1
28498	3.30291	0.500211	1.29455	1.40835	1.22986	3.54045	3.28315	2.56211	2.50951	3.18652	0.650371	3.25302	5.24258	18	57.3659	43.6728	1
28553	1.88207	0.202611	1.24559	1.52371	1.27439	2.37874	3.42244	2.60132	2.67414	3.31408	0.890255	2.93092	3.81638	15	83.6501	21.6969	1
29050	1.60396	0.295992	1.90383	0.613794	1.17767	2.46457	3.10626	1.41296	2.57359	3.34648	1.21278	2.80103	3.34985	15	82.2007	29.3167	1
29291	1.6321	0.158008	1.35232	0.933016	0.840295	2.38186	2.85372	2.60132	2.50593	3.21962	0.806189	2.70555	2.99258	15	77.7041	23.036	1
29300	1.72515	0.34448	1.38145	1.09175	1.14463	2.54192	3.13176	2.31648	2.56432	3.19767	1.33882	2.85196	3.36982	15	82.3327	23.2451	1
29316	4.30676	0.598323	1.44501	1.09175	0.813221	4.39305	3.33928	2.20797	2.78278	3.41576	0.818499	3.81687	6.27349	18	56.5091	45.3421	1
29350	1.5127	0.365788	1.42506	0.889271	0.560116	2.46073	2.86215	2.58361	2.4666	3.0511	1.31413	2.55922	2.97864	15	78.4775	23.6956	1
29398	1.69751	0.381666	1.2775	0.54646	1.03655	2.45302	2.95696	2.78504	2.77043	3.11934	0.921018	2.64407	3.2453	15	81.4645	20.6747	1
29604	1.52809	0.290561	1.31135	0.76564	0.532711	2.07685	2.65266	2.47788	2.00373	2.80641	1.00578	2.33432	2.96336	15	73.5725	26.3448	1
29695	1.52371	0.474942	1.12176	0.805394	0.87438	2.37561	2.68627	2.07545	2.11873	3.06386	1.05825	2.70555	3.11836	15	77.5179	25.1148	1
29777	1.57508	0.365788	1.68992	0.400044	0.682983	1.97864	2.48165	2.11797	2.28982	3.19814	0.677393	2.59188	3.05847	15	77.1356	26.9954	1
29997	1.57925	0.423555	1.40731	0.911316	1.03655	2.20304	2.75748	1.74535	2.47865	3.13767	1.14116	2.65187	2.87712	15	78.586	28.3808	1
30082	1.42524	0.24682	0.636701	1.05631	0.957905	2.14319	2.677	2.62854	1.98152	2.80162	0.797925	2.40905	2.72668	15	71.6367	19.7399	1
30257	1.96925	0.598323	1.79694	1.00973	1.33817	2.40242	3.27761	2.21411	2.75091	3.31696	1.08538	2.9747	3.52843	15	83.6003	25.5862	1
30404	1.93703	0.603101	1.53744	0.678739	1.06607	2.54987	3.00345	1.75681	2.78346	3.22503	1.33611	3.00523	3.59071	15	82.3755	28.8299	1
30624	1.7068	0.407925	1.62689	0.631347	0.985795	2.45592	2.93738	1.21129	2.61631	3.33647	0.850831	2.85578	3.21204	15	81.4438	30.1232	1
30765	1.27984	0.257802	1.01998	0.805394	0.699854	2.10445	2.45785	2.08243	2.02978	2.91803	0.777068	2.22217	2.79902	15	72.6679	28.4408	1
30936	1.41803	0.295992	1.44253	0.918588	0.961423	2.27928	2.69773	2.54192	2.05937	3.13865	0.973246	2.60823	3.11002	15	75.97	23.2264	1
31023	1.42044	0.252314	1.13472	1.51712	1.25789	2.3231	2.97961	2.65742	2.64486	3.08062	1.62059	2.58775	3.02794	15	76.4184	15.6876	1
31349	1.91144	0.75387	2.0496	0.847939	1.25789	2.65346	3.38824	1.79962	3.01989	3.55285	1.20063	3.23404	3.36065	15	83.6716	27.5191	1
31430	1.55822	0.490138	1.66191	0.83261	0.918588	2.13265	2.75174	1.84427	2.55837	3.12433	0.609043	2.66575	2.8037	15	77.4115	28.0424	1
31486	1.17173	0.263281	0.991417	0.925821	0.745372	1.95217	2.79888	2.3231	2.17113	2.66922	1.11849	2.40311	2.76627	15	71.2167	25.2968	1
31494	1.38626	0.515233	1.01998	0.239957	1.0299	1.98935	2.85242	1.98478	2.55153	2.69163	0.854823	2.43919	3.21204	15	78.0434	26.408	1
31614	1.59988	0.333768	1.05138	1.04976	0.878117	2.2689	2.97731	2.64868	2.57191	3.01848	0.818499	2.74242	3.13531	15	77.9071	20.9115	1
31651	1.479	0.454521	0.901871	1.01311	0.918588	2.03839	2.90759	2.10988	2.49692	2.67623	0.882457	2.68397	2.98144	15	76.3329	24.6394	1
31744	1.66722	0.32302	0.83879	0.863108	1.19532	2.30423	3.01183	2.74885	2.55581	2.89954	0.954824	2.62112	2.982	15	78.7962	20.3377	1
31906	1.6537	0.500211	1.54198	1.31466	1.22702	2.14581	2.79681	2.37143	2.38508	3.0012	1.02702	2.71654	3.11051	15	78.108	16.9838	1
31919	1.97787	0.549869	1.68199	1.09809	1.01985	2.76746	3.23533	2.25958	2.67414	3.49956	1.09208	3.02954	3.44347	15	83.6979	25.5437	1
31924	1.79722	0.490138	1.23673	1.04976	0.907666	2.20304	2.99895	2.72028	2.6283	3.17807	1.19757	2.7635	3.23012	15	80.1282	20.6772	1
31978	1.59579	0.449388	1.6919	0.957905	0.85933	2.20797	2.98018	2.39424	2.64094	2.92229	0.980544	2.7274	3.1164	15	78.4607	23.9224	1
32036	1.34333	0.439088	1.57323	0.678739	0.85933	2.37038	2.80368	0.911224	2.52811	3.25909	1.23376	2.66345	2.78754	15	78.7721	32.2012	1
32074	1.49485	0.295992	1.3683	1.00293	1.12313	2.3829	3.10677	2.74668	2.75652	3.04305	1.36565	2.8913	2.93679	15	80.0638	22.3637	1
32076	1.8852	0.631513	1.12501	1.33039	0.964932	2.41455	2.79475	2.38082	2.63937	3.05644	0.846829	2.70481	3.46686	15	82.3364	22.6435	1
32123	1.30406	0.485084	1.17594	0.670218	0.863108	2.16396	2.9933	2.66608	2.72452	3.05909	1.00934	2.70555	2.84365	15	74.7945	19.8726	1
32181	1.52152	0.376383	1.32242	0.712395	0.9366	2.17036	2.96922	1.89712	2.71508	2.98076	0.764416	2.81698	3.06158	15	79.0008	27.1314	1
32246	1.74139	0.32302	1.29737	0.866875	1.1044	2.47314	2.84194	1.56602	2.57023	3.03547	1.14755	2.64954	3.26068	15	79.3934	28.3521	1
32265	1.54326	0.376383	1.07189	0.844122	0.889271	2.14581	2.75677	2.18934	2.34384	3.10626	0.777068	2.67642	2.94321	15	76.6949	24.6677	1
32281	2.12679	0.603101	1.041	0.773674	1.22986	2.81457	3.14744	2.25017	2.85323	3.46864	0.924816	3.04174	3.5772	15	83.1677	23.8974	1
32477	1.58962	0.185927	1.08538	1.25234	1.05957	2.46934	2.76106	2.22989	2.42666	3.25473	0.834754	2.4315	2.84493	15	76.9323	24.0073	1
32486	1.75031	0.631513	1.35232	0.996105	1.17173	2.20056	3.32919	1.87867	2.82486	3.08993	0.928603	2.8621	2.99479	15	82.2254	25.5485	1
32499	1.58341	0.50523	1.46217	0.50959	0.940174	2.40951	2.94573	1.55232	2.63068	3.23086	0.886362	2.87213	3.05639	15	80.3071	29.5609	1
32595	1.60396	0.433921	1.60146	1.3459	1.12313	2.47409	2.88702	2.43839	2.63858	3.25996	0.874616	2.79902	2.8913	15	78.1877	16.57	1
32658	1.79551	0.219239	1.62059	0.947294	0.914957	2.53748	3.05271	1.04551	2.65574	3.17901	1.01998	2.87774	3.14487	15	81.5638	30.167	1
32689	1.62613	0.49518	1.10865	0.551023	0.518869	2.27699	2.59461	2.7053	2.09754	3.22098	0.980544	2.5481	2.99699	15	75.4095	22.6952	1
33032	1.10125	0.559657	1.2631	1.33817	1.28527	1.83196	3.30332	2.57076	2.77043	2.98248	0.842815	2.83397	2.79969	15	75.024	16.8781	1
33117	1.57508	0.365788	1.24264	0.914957	1.02656	2.3577	2.98419	2.10036	2.50143	3.15228	0.830707	2.78618	3.02794	15	78.2906	25.6471	1
33264	1.75386	0.480019	1.363	1.63011	1.45127	2.10581	3.03111	2.25606	2.77868	3.01072	0.672919	2.65187	3.12226	15	78.3455	16.994	1
33357	1.74497	0.745113	1.85934	0.682983	1.42763	2.48728	3.38518	1.76438	3.0322	3.26775	1.07189	3.18543	3.13291	15	83.2316	27.8066	1
33503	1.70495	0.423555	1.33065	0.741287	1.05631	2.39629	2.97904	2.44231	2.47957	3.07854	1.11194	2.66038	3.4086	15	81.9933	22.2738	1
33553	1.48355	0.525188	1.61213	0.551023	0.613794	2.25371	2.84062	1.77377	2.50951	3.15518	1.12826	2.67262	2.9747	15	78.5112	27.7125	1
33726	1.51932	0.360476	1.46217	1.01985	0.892969	2.26192	2.56731	2.29862	1.99342	2.96281	0.9769	2.45157	2.95363	15	73.4502	26.4765	1
33841	1.75208	0.428743	1.19143	0.467335	0.87438	2.53748	2.72768	2.73723	2.49782	3.3004	1.29173	2.70996	2.982	15	80.6864	21.1613	1
33889	1.5127	0.163603	1.2631	0.720703	1.08538	2.26774	2.79405	2.38082	2.35222	3.07646	0.826649	2.63068	2.84749	15	76.0721	24.4768	1
34120	3.20549	0.290561	1.5306	0.789617	0.847939	3.48057	2.94573	2.02082	2.33751	3.37089	1.266	3.17256	5.11076	18	57.0219	43.4307	1
34186	1.6498	0.525188	1.72489	0.724841	1.18358	2.46743	3.0889	2.39936	2.51752	3.33606	1.17594	2.87338	3.03804	15	81.2189	23.8596	1
34216	4.65962	0.696078	1.87769	1.20694	1.29067	4.74707	3.51214	2.35557	2.92739	3.95807	1.10535	4.12679	6.61558	18	56.1431	46.369	1
34274	1.93256	0.50523	1.3683	0.564647	0.733085	2.48447	2.7899	1.27467	2.50503	3.28315	1.0022	2.84941	3.64473	15	81.7462	30.217	1
34300	1.7215	0.279673	1.2631	0.75351	1.09809	2.38601	3.24947	2.06843	2.91908	3.20916	0.513824	2.99036	3.25728	15	82.3378	25.2485	1
34417	1.58755	0.279673	1.28606	0.863108	1.09809	2.58446	3.05697	2.12467	2.7628	3.19072	1.04447	2.78414	3.09663	15	81.3297	25.1634	1
34594	1.60396	0.485084	1.46217	0.48151	0.836458	2.33186	2.80709	1.86847	2.52811	3.03275	0.874616	2.64329	3.13675	15	78.7009	27.3444	1
34769	1.30937	0.312235	1.42506	0.604953	0.661655	2.11663	2.45881	2.37978	2.07453	2.99782	1.16025	2.39113	2.85768	15	73.4641	26.5393	1
34781	1.35102	0.34448	0.760175	1.1044	0.728968	2.01639	2.88197	2.75677	2.32365	2.78085	0.998616	2.50143	2.94495	15	71.9368	19.5319	1
34799	1.54541	0.574248	1.79156	0.863108	0.922209	2.4085	3.10271	1.50779	2.65729	3.38862	1.07865	2.84749	3.04016	15	81.789	29.2474	1
34813	1.45594	0.129967	0.609043	0.582667	0.609379	2.38704	2.65821	2.65425	2.26398	3.13767	1.10205	2.59927	2.91968	15	74.4765	22.4959	1
34905	1.56035	0.257802	1.09873	0.716554	1.1747	2.19059	3.03275	1.91198	2.76141	3.16812	0.699588	2.79498	2.95936	15	79.2377	27.129	1
34945	1.39367	0.0509779	0.984178	0.695652	0.604953	2.05994	2.98477	2.74813	2.45157	2.90944	0.403926	2.60091	2.94901	15	68.6614	21.5054	1
35068	1.68814	0.515233	1.89247	0.270554	1.5497	2.37457	3.43016	1.09079	3.0391	3.51585	1.17282	3.10854	3.15387	15	83.4402	28.8213	1
35268	1.7324	0.386939	1.52831	0.947294	1.01311	2.40038	2.99895	2.51588	2.51664	2.88765	0.921018	2.6989	3.58582	15	82.1434	22.1496	1
35442	1.15373	0.515233	1.24559	1.04647	0.87438	2.0935	2.81929	2.31869	2.23863	3.03275	0.890255	2.63701	2.74029	15	72.4136	25.6968	1
35615	1.54756	0.339129	1.266	1.22131	0.757564	2.07405	2.51314	2.7053	1.85597	2.91925	0.677393	2.41691	2.75372	15	69.1028	23.3276	1
35670	1.39367	0.252314	1.39704	0.809313	0.851746	2.01342	2.88765	1.75491	2.44873	3.09352	0.663935	2.4942	2.7725	15	77.1621	28.589	1
35714	3.80173	0.365788	1.88593	0.59607	1.18653	4.02786	3.4098	1.22363	3.13291	3.54667	1.20672	3.75748	5.84772	18	56.328	44.5023	1
35747	1.48127	0.49518	1.50748	0.769662	0.889271	2.14842	2.72473	1.80326	2.26398	3.11784	0.789617	2.48783	2.91848	15	77.3559	28.1708	1
36280	1.50381	0.301415	1.25145	1.16875	0.699854	2.45881	2.93498	2.76034	2.29204	3.0925	0.738799	2.62272	3.04332	15	77.2517	21.4121	1
36383	1.52371	0.549869	0.806189	0.653049	0.64006	2.19309	3.06227	2.3242	2.56347	3.04842	0.777068	2.59763	3.11738	15	76.6266	24.6367	1
36450	1.70495	0.626808	1.70755	0.560116	0.805394	2.3231	3.15855	1.89878	2.76904	3.05431	0.998616	2.77043	3.42601	15	81.2981	28.5714	1
36665	1.64	0.464754	1.12176	1.20983	1.23269	2.47314	3.02344	1.67594	2.48233	3.37748	1.25145	2.83592	2.94843	15	80.2034	28.7129	1
36774	1.68247	0.180354	1.78617	1.09493	0.781666	2.36617	2.64789	1.38661	2.26284	3.14598	0.708384	2.54379	3.16279	15	78.9961	28.5673	1
36816	2.28058	0.650207	1.77711	0.476795	1.6537	2.8933	3.74257	1.78122	3.2708	3.7779	1.65377	3.48465	3.74082	15	84.0413	27.2279	1
36835	1.75208	0.360476	1.3683	0.234836	0.892969	2.35023	2.79198	2.24306	2.45629	3.01738	0.882457	2.59023	3.23186	15	78.4617	25.8379	1
36936	1.61409	0.500211	1.51214	0.50027	0.824885	2.30871	2.88828	2.47124	2.38103	3.06755	1.14755	2.7821	3.23925	15	78.7316	24.5571	1
37072	1.60803	0.510237	1.06509	1.04317	0.940174	2.41455	2.82601	2.3253	2.44111	3.18605	0.681856	2.57778	2.9467	15	76.9385	24.2395	1
37121	1.7031	0.598323	1.13472	0.69144	1.16875	2.57335	3.07802	1.98783	2.77387	3.39964	1.03752	2.93269	3.15293	15	82.0817	25.2872	1
37175	1.48355	0.569396	1.73251	0.911316	0.95084	2.34163	2.93378	2.76462	2.35326	3.22593	1.24852	2.5193	2.78141	15	78.2952	22.2184	1
37528	1.53678	0.559657	1.47668	0.957905	1.05957	2.26658	2.90944	1.55232	2.38205	3.12034	0.854823	2.6542	3.23665	15	79.3005	28.4939	1
37777	1.28256	0.515233	1.00934	1.07577	0.591613	1.98171	2.66216	2.55163	2.07999	2.65187	0.755923	2.43246	2.7635	15	70.4583	24.7651	1
37861	1.47442	0.549869	1.61213	0.878117	0.704045	2.24425	2.70228	2.35983	2.18228	3.15855	1.09873	2.62432	2.82027	15	76.6003	25.9848	1
38167	1.67106	0.202611	1.51447	0.49091	0.793577	2.45881	2.85503	2.42654	2.31068	3.30373	0.965908	2.84941	3.08306	15	78.6729	24.5634	1
38195	1.63011	0.49518	1.12176	1.17767	1.20405	2.46265	3.01238	2.43938	2.69146	3.23711	0.947384	2.90226	3.14153	15	82.2018	22.5638	1
38234	1.71785	0.510237	1.48625	0.674484	1.18653	2.52042	2.91619	2.70001	2.41887	3.02947	0.93238	2.50323	3.34636	15	81.6881	20.8681	1
38265	1.40104	0.317632	1.19143	0.591613	0.716554	2.23829	2.70606	2.77874	2.33113	3.01294	1.17282	2.69964	2.98368	15	75.5182	22.5054	1
38268	1.51491	0.381666	1.29737	0.518869	0.851746	2.29749	2.89142	2.45785	2.76141	3.3054	1.34154	2.79161	2.92739	15	79.8191	23.5373	1
38513	1.847	0.673297	0.954824	0.523493	0.844122	2.54192	3.08787	2.7321	2.57861	3.26818	1.04793	2.7855	3.10854	15	80.6938	20.9223	1
38609	1.95911	0.766914	2.17486	0.781666	1.38378	2.78015	3.32269	2.02377	3.01665	3.59695	1.46703	3.24745	3.27707	15	83.8254	27.3431	1
38685	3.29163	-0.062293	1.45485	1.18063	1.06607	3.63501	3.06069	1.32076	2.49238	3.39661	1.05482	3.256	5.32243	18	56.741	43.4013	1
38716	1.74497	0.500211	1.36034	0.532711	0.745372	2.27584	3.00904	2.45108	2.27978	3.1935	0.785445	2.73458	2.97751	15	77.8872	24.1929	1
38754	1.7378	0.301415	2.05519	0.591613	1.3173	2.45785	3.11182	1.93788	2.80837	3.41054	1.42254	3.08204	3.19589	15	83.1371	27.74	1
38785	1.67297	0.696078	1.61	1.20694	1.38378	2.49752	3.32513	2.50582	2.8077	3.34807	1.04793	2.99755	3.14344	15	83.3467	25.1459	1
38852	1.77315	0.191494	1.17282	0.789617	0.678739	2.43938	2.62201	2.38704	2.03406	3.11383	1.02351	2.63622	3.21692	15	77.2156	24.6216	1
38917	1.26342	0.263281	1.47187	0.234836	0.836458	2.05566	2.9899	2.31093	2.49782	2.88007	0.708384	2.66957	3.03539	15	77.0865	26.0761	1
39053	3.9547	0.687003	1.87106	0.892969	1.42763	4.04705	3.31942	2.14188	2.92561	3.50195	1.04793	3.5849	5.88688	18	56.7235	44.736	1
39292	1.03655	0.490138	1.16969	1.04976	0.968432	2.19559	2.80709	2.21043	2.19087	2.80641	0.998616	2.41003	2.6937	15	72.0857	25.7551	1
39294	1.78525	0.279673	1.34154	0.64873	0.716554	2.25253	2.87816	2.02671	2.31068	2.995	1.27176	2.56347	3.17209	15	78.4671	26.6087	1
39323	1.59579	0.554769	1.55771	0.631347	0.828753	2.30087	2.82734	2.27237	2.26852	3.15422	1.33338	2.65031	3.07135	15	78.6372	24.9086	1
39686	1.43715	0.664098	1.90705	1.6653	1.14463	2.10309	2.83334	2.21166	2.43343	2.88133	0.886362	2.50862	2.7855	15	77.5217	16.4857	1
39818	1.71418	0.312235	1.54424	0.578178	0.9366	2.24899	2.9229	2.21411	2.59188	3.30457	1.23969	2.87649	2.9792	15	80.0066	24.3299	1
40019	1.61409	0.312235	1.54875	0.745372	0.925821	2.38186	2.82198	2.55863	2.41985	3.09557	0.677393	2.59271	3.10607	15	77.5041	23.3563	1
40028	1.43715	0.24682	0.965908	1.21271	0.821007	2.00895	2.82534	2.59461	2.20302	2.94216	0.690745	2.56347	2.7274	15	72.1793	19.8222	1
40148	1.40348	0.402694	1.48625	0.847939	1.13852	2.44329	2.55601	2.13	2.04679	3.22143	0.83879	2.59271	3.16606	15	77.2118	25.8079	1
40280	1.72515	0.515233	1.79515	0.678739	1.22417	2.45881	2.98419	1.43616	2.61308	3.36112	0.984178	2.9403	3.05899	15	81.8103	29.4329	1
40295	1.69564	0.847022	1.58199	0.801465	1.13852	2.45398	2.91925	2.39732	2.57443	3.27076	0.939903	2.7821	3.17302	15	81.8633	23.4449	1
40498	1.76618	0.766914	1.88757	0.573678	1.56246	2.45398	3.45872	1.41035	3.0693	3.39282	0.595056	3.11836	3.2687	15	83.407	28.2543	1
40503	1.67297	0.459643	1.06849	1.42044	1.39859	2.41756	3.17901	2.6801	2.66881	2.99839	1.266	2.67869	2.86964	15	76.3364	15.8105	1
40636	1.48127	0.224769	1.58852	1.00633	1.05631	2.25606	2.95578	2.54899	2.62192	3.09044	1.355	2.68096	2.92679	15	79.8153	22.3965	1
40804	1.61409	0.469854	1.36034	0.847939	1.22986	2.27928	3.04089	2.06984	2.60742	3.12681	1.14755	2.68547	2.92324	15	80.4144	25.7049	1
40947	1.62013	0.24682	1.57762	0.720703	1.24115	2.45011	2.9481	1.91851	2.44968	3.34966	0.755923	2.8621	2.96905	15	80.5682	27.6551	1
41072	1.59374	0.333768	1.33882	1.43951	1.01311	2.31538	2.70077	2.2689	2.48141	2.9899	0.901871	2.46193	3.24444	15	77.1676	21.5525	1
41079	1.65758	0.583915	1.23079	1.23552	1.09493	1.98478	2.99443	2.62037	2.52459	2.88828	0.936147	2.76141	3.07595	15	76.7458	19.1496	1
41175	1.8124	0.444243	1.44994	0.911316	1.08538	2.49473	3.43711	2.58785	2.79969	3.34568	1.29455	3.05066	3.04909	15	81.4336	23.2754	1
41254	1.72515	0.813814	1.80936	0.75351	1.48127	2.36722	3.12483	1.67594	2.7889	3.39358	1.04793	2.93151	3.03486	15	82.703	27.878	1
41388	1.51049	0.515233	1.986	0.728968	1.29872	2.07545	3.26688	2.36194	2.86147	3.12532	1.2775	2.95707	2.92739	15	80.8693	24.1344	1
41433	1.75739	0.631513	1.96491	0.270554	1.08857	2.39322	2.97616	1.42848	2.57443	3.35165	1.12826	2.88022	3.05795	15	81.7219	29.758	1
41585	1.40835	0.397453	1.55771	0.578178	0.828753	1.99239	2.64709	1.81591	2.30085	3.0135	0.93238	2.57945	2.71289	15	76.722	29.5169	1
41586	1.93852	0.263281	1.50045	0.716554	0.992678	2.65663	3.13914	1.98171	2.29535	3.44508	1.0129	3.00085	3.31753	15	81.7268	27.465	1
42185	1.60396	0.58873	1.31413	0.745372	1.03987	2.31538	2.86987	2.21655	2.60985	3.07018	0.905722	2.67338	3.00249	15	78.0361	25.763	1
42323	1.60396	0.500211	1.11849	0.907666	0.741287	2.3829	2.74668	1.67183	2.41299	3.26429	0.969582	2.62432	3.10952	15	78.8386	28.1564	1
42366	1.51712	0.191494	1.24264	0.737191	1.01311	2.10988	2.89455	2.55601	2.38306	2.95224	1.02351	2.67034	3.15998	15	76.7846	23.1865	1
42521	3.10655	0.485084	1.71722	0.773674	0.911316	3.50229	3.15903	1.85644	2.82877	3.59477	1.22482	3.26237	5.11913	18	56.8867	43.4233	1
42533	1.59988	0.525188	1.51679	0.866875	1.49485	2.44524	3.34088	2.58955	2.79228	3.27162	1.4573	2.99147	3.111	15	81.4584	23.4972	1
42542	3.85862	0.129967	1.2602	0.929423	1.07898	3.9746	3.17665	2.62528	2.43246	3.52088	1.13794	3.38229	5.76852	18	57.1228	44.5283	1
42711	1.86468	0.535096	1.74946	1.24676	1.46291	2.56298	3.24772	2.2323	2.81566	3.45228	0.695173	2.95707	3.34246	15	83.4768	25.4389	1
42839	4.3911	0.392201	1.44253	1.29336	1.02656	4.50368	3.37979	2.30982	2.5761	3.59353	0.980544	3.90307	6.3735	18	56.5107	45.5715	1
42977	1.65758	0.285121	1.8005	0.737191	1.05304	2.60382	2.97961	1.72598	2.51752	3.2411	1.42254	2.81895	3.49745	15	82.2158	28.9346	1
43038	1.78697	0.525188	1.33065	0.757564	1.03323	2.44329	2.82131	1.06312	2.59188	3.40792	0.89801	2.69146	3.31392	15	81.4598	30.3358	1
43054	1.38874	0.274217	1.44253	0.618198	1.18653	2.25253	3.04681	1.60828	2.67414	3.04842	1.23079	2.76974	2.92679	15	79.5884	29.7994	1
43135	3.26225	0.252314	1.52601	1.0299	0.933016	3.52322	3.11584	2.5357	2.58361	3.27761	0.785445	3.14344	5.15169	18	57.3481	43.6008	1
43261	1.65564	0.433921	1.11522	1.51491	1.09175	2.39527	2.95696	2.65979	2.37493	3.17524	0.768645	2.6802	3.23143	15	78.6979	16.535	1
43281	1.76967	0.554769	1.66999	0.975405	1.28527	2.41856	2.98419	1.66771	2.71726	3.35085	1.24852	2.81235	2.89923	15	82.0779	27.9514	1
43288	1.77315	0.230292	1.71722	0.881845	1.24955	2.40242	3.01294	2.37038	2.63385	3.24287	1.30018	2.82812	3.04174	15	81.3244	23.5834	1
43301	1.51932	0.381666	0.91721	1.01985	0.992678	2.42754	2.73283	2.63664	2.24212	3.1986	0.91721	2.66498	2.94321	15	76.1756	21.0809	1
43367	1.47671	0.24682	1.00578	1.20405	0.885563	2.21777	2.63987	2.55426	2.38811	3.01682	0.991417	2.45629	2.9565	15	76.4679	21.5041	1
43447	1.58962	0.636205	1.48625	0.847939	0.704045	2.46648	2.75246	1.9021	2.27304	3.24552	1.36034	2.55752	2.86776	15	77.8858	27.3327	1
43462	2.18105	0.439088	1.57762	1.04647	1.40348	2.79336	3.36229	2.72324	2.80704	3.50774	0.958529	3.09962	3.8093	15	83.776	21.7823	1
43636	5.47278	0.579088	1.77893	0.781666	1.43478	5.56846	3.80171	2.00745	3.17487	4.14414	0.878542	4.73032	7.50616	18	55.1302	47.858	1
43937	1.75208	0.392201	2.11742	0.653049	1.08219	2.57506	3.20779	1.66771	2.92324	3.38518	1.23969	2.8913	3.27624	15	82.9487	28.3085	1
1	0.555575	0.152409	0.686307	0.661655	0.682983	0.903357	2.00596	2.56904	1.42506	1.71418	1.3169	1.78797	1.21882	18	40.9074	42.4914	0
2	3.20506	1.92339	1.45485	0.741287	3.60747	3.02179	3.27932	4.80569	2.10421	4.10418	4.0163	2.90226	2.5541	27	3.0845	-47.0318	0
3	5.26377	1.50539	1.15074	1.64	3.12658	2.33295	3.1705	4.48877	2.34804	1.87698	2.71143	1.83206	3.99738	11	-11.9272	48.1423	0
4	2.4785	1.3292	3.10804	1.01649	2.45812	1.98783	2.95283	4.06139	3.71906	2.67467	1.40986	2.77525	2.93738	13	15.6915	68.7176	0
5	4.93155	1.99239	0.632121	1.26342	3.56043	2.16524	3.57973	4.28798	2.61308	2.18431	2.93796	2.33645	3.77107	28	-11.1317	20.3452	0
6	5.35095	1.59069	0.743098	1.60803	3.02627	2.4315	3.24066	3.98392	2.77043	1.76627	2.25368	2.329	3.97913	11	-25.3686	47.7717	0
7	0.769662	0.736308	1.48625	1.23552	0.295865	1.14436	1.01683	2.65107	1.02351	2.08104	0.650371	1.38927	1.53971	30	-33.0548	60.4911	0
8	1.61812	1.56375	2.75652	0.940174	2.11684	1.65316	2.77312	3.89948	3.90864	2.58701	1.42254	2.51397	2.42082	13	17.2877	66.9446	0
9	5.18649	1.07356	0.668433	1.50158	2.80482	2.21655	3.19582	4.48609	2.43823	2.19559	2.95017	2.1548	3.79024	11	-24.1226	51.442	0
10	4.7811	1.7775	0.730168	1.5411	3.40682	1.99995	3.60775	4.92924	2.86462	2.33295	2.83332	2.50503	3.60614	28	-5.67151	24.4143	0
11	1.92957	0.146805	1.672	2.08767	0.885563	1.63841	2.69316	4.32554	2.31177	2.77171	2.74597	2.38306	2.13564	29	70.3393	-16.5348	0
12	5.02715	1.85471	0.954824	1.57925	3.43298	2.41656	3.75325	4.95112	2.92857	2.24899	2.75722	2.6155	3.79498	23	10.1358	28.2496	0
13	4.13043	1.95059	0.905722	0.777675	3.51889	1.64896	3.46334	4.57542	2.52283	2.22021	2.93504	2.17113	2.8968	2	-37.1163	-5.74983	0
14	2.27524	1.58178	4.35215	1.41562	2.50277	2.18431	3.22098	2.77241	4.20669	2.97846	2.0482	3.65078	3.88664	13	9.94794	79.661	0
15	1.86945	1.93948	1.29737	1.76091	3.47815	2.3891	2.93017	2.41756	1.83723	3.22503	3.82487	2.11479	1.74196	8	19.7988	-69.3062	0
16	4.06394	2.64868	0.894138	1.07254	4.26798	1.79962	4.03269	4.11089	3.14153	2.15103	1.98301	2.35535	3.02258	20	-11.9527	-19.1871	0
17	5.19512	1.9863	0.830707	1.7215	3.83684	2.29184	3.65366	4.52784	2.76071	2.39219	3.02526	2.06629	3.86763	23	7.78279	29.7316	0
18	2.2481	1.50299	4.26262	1.09809	2.89003	1.95375	3.30788	3.66996	4.37609	2.35557	2.27078	3.51438	3.8176	13	9.58405	78.1546	0
19	0.64006	1.16386	1.78797	0.728968	1.65758	1.24491	1.96627	3.94347	3.42708	1.95375	0.627529	1.90544	1.41495	18	27.5568	55.1348	0
20	4.76937	1.92501	0.913391	1.29604	3.67614	2.05709	3.60622	5.05903	2.7821	2.24899	2.86336	2.27191	3.32591	28	-10.6479	14.2214	0
21	3.07549	1.70225	1.20063	0.239957	1.30406	4.23821	1.7122	4.07957	1.65581	4.783	1.51679	3.34402	3.36295	17	-3.95847	-84.5603	0
22	3.07695	3.1776	1.08202	1.66722	4.86704	3.48855	4.40793	2.28615	3.31713	4.57729	4.64909	3.38041	2.92205	24	27.3988	-46.3903	0
23	5.15484	1.69824	1.13472	1.53678	3.44446	2.2941	3.26343	4.99643	2.4286	2.26308	3.64329	1.94804	3.7337	9	7.17953	45.0188	0
24	4.53451	1.74343	0.802063	1.76443	3.35345	2.08936	3.49545	4.89777	2.83915	2.06702	3.51207	2.39213	3.25088	28	-7.89188	28.7677	0
25	4.6415	2.31316	0.947384	1.85346	3.93802	2.0935	3.69756	4.96427	2.93386	1.95217	2.78958	2.08407	3.31593	16	3.71462	11.0533	0
26	1.87736	0.252314	1.05825	0.33099	-0.0210651	0.766914	0.0339935	0.714081	0.0165992	1.39722	0.36791	0.668433	0.846829	30	-33.8434	72.5916	0
27	1.12931	0.118721	1.20672	0.961423	0.453073	1.90869	2.54015	3.63322	2.22572	2.53748	0.681856	2.05937	2.49873	4	59.993	18.4738	0
28	2.67412	2.36828	1.0022	0.564647	3.99717	3.23755	3.5667	0.745113	2.75652	4.29696	5.20441	3.02419	2.68171	24	42.5999	-59.1775	0
29	2.0376	1.38927	2.90529	0.896658	2.1452	2.94395	2.75605	3.51045	3.89049	4.04129	1.75875	3.09162	2.56432	19	-88.6915	-9.21872	0
30	4.95543	1.8871	0.89801	1.61812	3.59541	2.25841	3.79128	4.63963	3.1242	2.00296	3.13579	2.5761	3.81273	23	4.86308	33.1731	0
31	3.77528	1.89045	0.48437	0.6444	3.306	1.84427	3.57117	4.40337	2.56262	2.34594	3.11836	2.40112	2.84429	2	-46.2714	-9.15649	0
32	0.682983	0.564533	1.89084	0.999524	0.325995	1.07703	0.714081	2.40343	1.42506	2.24306	0.866732	1.39445	1.33338	30	-34.9201	59.7348	0
33	4.67614	1.2419	0.557243	1.23552	2.66978	2.18557	2.78434	4.85659	1.99342	2.52132	3.49477	1.89084	3.52616	25	-42.2574	32.049	0
34	4.26754	1.89878	0.469494	0.947294	3.55322	1.94901	3.56574	4.31651	2.94263	2.41354	3.33264	2.43823	3.13146	10	-13.1974	0.32293	0
35	4.40869	2.22989	0.469494	1.18946	3.89825	1.69221	3.49097	4.56686	2.52018	2.16653	2.5761	1.83379	2.84749	10	-26.6835	1.58018	0
36	3.06721	1.97556	1.28606	0.280699	1.58133	4.18117	1.78493	2.56124	3.19815	4.17701	1.4573	2.97301	3.2611	26	-11.1991	-57.867	0
37	4.69316	2.18179	1.52371	1.71418	3.77673	2.07965	3.72743	5.10434	2.85132	2.126	2.86587	2.43246	3.31713	16	2.05626	11.4402	0
38	4.88512	2.30647	0.632121	1.83559	3.90908	2.14188	3.83382	4.12326	2.82486	1.95689	2.51397	2.32579	3.50379	16	-6.04738	17.3434	0
39	2.19967	1.31226	4.12464	1.06607	2.61149	1.88373	3.20458	4.38008	4.26231	2.5742	2.12917	3.32273	3.53619	13	11.7788	75.0616	0
40	3.40507	1.51732	0.760175	1.10125	3.05984	1.36508	2.92351	3.7026	2.22572	1.67389	1.74384	1.96339	2.3322	6	-57.9528	5.80575	0
41	2.25686	0.784136	3.05587	0.87438	1.05304	3.10017	1.41815	3.12184	2.84172	4.0682	2.10686	2.81434	3.09012	19	-85.6382	-3.77363	0
42	1.71968	2.16909	1.16025	0.50959	3.68938	1.27467	3.45264	6.47021	2.15985	2.35237	1.79336	1.6036	1.51214	13	9.28015	63.7484	0
43	5.22814	2.66451	1.5306	1.81574	4.25012	2.71506	4.06081	4.7829	3.34636	2.82935	3.48803	2.77525	3.93363	5	26.9748	-10.1918	0
44	4.88297	2.16909	1.21278	1.42044	3.73212	2.40546	3.62057	5.17332	2.84429	2.57249	3.50046	2.41003	3.66787	16	10.4025	12.8648	0
45	3.94762	1.6841	0.781262	1.04317	3.28456	1.49334	3.06386	4.16318	2.14078	2.02524	2.33962	1.9356	2.74455	6	-51.2996	0.0447458	0
46	3.98668	1.03125	0.9769	1.27166	2.70334	1.55232	3.2464	4.90182	2.45535	1.72009	2.86273	2.23746	2.78414	6	-51.5517	17.534	0
47	1.34333	0.392201	0.890255	1.09493	0.881845	2.18305	2.66451	1.56602	2.44588	3.17618	1.34154	2.47588	2.63068	15	76.0015	30.1499	0
48	2.23481	1.71615	1.12501	1.12313	3.37528	3.09044	2.91558	1.95059	2.09486	4.18117	4.00608	2.55068	2.43053	8	21.6182	-70.2886	0
49	5.5175	1.91034	1.80228	2.08122	3.72377	2.64948	3.90543	4.25234	3.23055	2.38704	3.55501	2.78822	4.20008	23	20.4258	37.7031	0
50	2.59207	2.52674	1.91824	2.44732	4.17788	3.18745	3.73557	3.02893	2.89007	4.21321	4.44996	2.95936	2.25483	8	16.7327	-52.358	0
51	2.56746	0.444243	1.38927	1.56668	1.16875	1.89712	3.05697	4.18859	2.14718	2.83334	3.2253	2.39913	2.36054	29	72.2014	-19.434	0
52	4.66061	2.02524	1.16969	1.37631	3.6208	2.19184	3.41017	4.76548	2.67945	2.08936	3.29074	1.83723	3.2611	28	-10.0509	30.9516	0
53	4.84143	1.48116	0.388549	1.18946	3.14757	2.12333	2.84981	4.82279	2.14718	1.99087	1.74946	1.83551	3.48023	25	-34.0741	36.2725	0
54	4.35781	1.78308	0.854823	1.22417	3.39489	2.02964	3.30457	4.69116	2.64564	2.30423	2.62112	2.08407	3.09062	10	-26.1572	9.5216	0
55	4.46816	3.20136	1.55324	1.46522	4.86842	2.51406	4.57845	4.94743	3.66702	3.0728	3.67854	2.75652	3.43709	5	22.5034	-21.292	0
56	4.70171	2.77241	0.793777	1.76443	4.42029	2.21288	4.18618	4.30739	3.26025	2.34486	2.76835	2.19209	3.5349	22	13.0046	-3.12886	0
57	4.92062	1.77564	0.580963	1.41078	3.40507	2.31316	3.38018	4.42382	2.63622	2.09212	2.38407	2.26398	3.61392	11	-18.938	36.8852	0
58	4.60235	1.20195	1.34694	2.04165	2.63054	1.79597	3.29957	4.89565	2.49329	1.69019	2.48965	2.3657	3.30382	25	-34.4319	27.6529	0
59	4.08896	1.23584	0.743098	0.682983	2.71798	1.81231	3.09404	4.67997	2.49329	2.22869	3.25728	2.15354	2.87712	6	-53.2391	16.1198	0
60	4.54598	2.35557	1.00934	1.64393	4.08116	1.86161	3.84672	3.92374	3.0003	2.14712	2.80237	2.39913	3.31874	3	-3.95432	-3.34143	0
61	1.37631	0.279673	2.03406	0.532711	0.761607	1.05258	1.62774	1.73958	1.9465	1.50059	0.214159	1.39445	1.62269	18	38.1031	51.1258	0
62	2.49071	1.63415	1.51214	0.224574	1.64	3.72497	1.84602	1.12121	3.30342	4.24131	0.654904	2.94321	2.96165	26	-4.14814	-63.9967	0
63	4.72701	2.36089	1.02351	1.63011	4.02087	2.21899	3.9496	4.85057	3.01881	2.44427	2.88145	2.5761	3.50112	22	11.2002	-4.63289	0
64	2.85801	2.03111	0.725834	1.20983	3.50285	3.02838	3.08477	3.43929	2.21741	4.13891	4.43617	2.81566	2.68847	8	27.2445	-69.0304	0
65	4.71141	1.71813	0.854823	1.09175	3.42239	2.15622	3.24991	4.42707	2.36364	2.03694	2.20784	1.78797	3.35411	25	-30.1269	29.0223	0
66	4.53157	2.14712	1.06509	1.83231	3.82864	2.0528	3.58603	5.03867	2.83073	2.30982	3.04962	2.46005	3.24487	16	0.652299	8.66617	0
67	1.00973	0.549869	2.39614	0.518869	1.58548	0.883493	2.20551	3.43856	2.88392	1.64264	0.834754	1.7606	1.68199	18	31.2179	57.935	0
68	0.907666	0.402694	1.22781	1.20983	0.978877	1.75491	2.64469	3.64571	2.19939	2.78154	0.57151	2.29645	1.69779	1	54.0633	18.7618	0
69	4.91616	2.26541	1.00934	1.53895	3.69332	2.25489	3.80272	4.63831	3.12031	2.28957	2.92443	2.61952	3.64877	23	15.6837	16.2402	0
70	2.83732	1.40249	0.822579	0.183305	1.12622	3.99337	1.45638	1.38394	2.47957	4.64312	0.690745	3.19362	3.13339	26	-7.96548	-66.2595	0
71	5.02133	2.33404	1.42506	1.99348	4.03009	2.2323	3.79256	4.8017	2.74171	2.2907	3.41553	1.95113	3.66022	16	11.3561	14.8244	0
72	5.03328	2.00296	0.64127	1.38378	3.69096	2.2689	3.57593	4.43677	2.74526	2.07545	2.49056	2.00227	3.61064	28	-9.10761	19.9828	0
73	1.35867	0.75387	2.45157	0.892969	1.81908	1.11786	3.04412	3.19072	3.32908	1.82486	0.59973	2.95247	2.44683	13	26.8318	65.1882	0
74	4.98302	2.31316	0.874616	1.65952	3.99775	2.24544	3.85635	4.95975	2.797	2.27468	3.02365	2.13435	3.66872	23	8.1246	20.674	0
75	3.97863	2.23829	0.677393	0.863108	3.8162	1.66977	3.78359	4.68081	2.91848	2.15881	2.70186	2.34594	2.79093	2	-29.0365	-14.454	0
76	3.06378	0.664098	1.3169	2.38483	1.42284	1.87867	2.65028	3.82719	2.09754	2.71207	2.7026	2.14973	2.55922	29	73.4864	-17.7926	0
77	5.10473	2.35344	1.16969	1.56668	3.904	2.67156	4.06471	4.80207	3.2891	2.84785	3.61868	2.91371	3.91174	22	26.6078	-7.68971	0
78	1.56035	0.972585	1.68992	1.93703	1.82737	2.00745	4.00272	3.6245	3.36678	2.90512	3.0003	3.3545	2.71726	29	66.6934	-17.5956	0
79	2.73037	0.564533	1.54198	2.4688	1.34333	2.04706	3.00401	3.81901	2.37391	2.90326	3.42959	2.55068	2.63464	29	74.074	-16.7462	0
80	5.23225	1.80508	0.663935	1.54326	3.49968	2.50766	3.52456	4.81566	2.64798	2.43938	3.33067	2.54724	3.8704	23	11.5599	37.7109	0
81	4.47873	1.4336	0.393685	0.836458	2.74463	2.02818	3.22952	3.97247	2.45911	2.31316	2.93738	2.31934	3.26364	6	-47.1351	17.7478	0
82	4.43874	1.99087	0.781262	0.964932	3.66999	1.95059	3.56638	4.04606	2.76904	2.06419	3.01394	2.44397	3.20085	10	-15.4177	-2.31219	0
83	0.64873	0.749498	1.44253	1.04317	0.54646	1.12454	0.766914	2.60466	1.43757	2.01342	0.866732	1.29455	0.760175	30	-31.4709	60.6104	0
84	1.38874	0.859283	1.94804	0.678739	1.27712	1.70025	1.72402	4.30556	2.99699	2.47314	0.609043	2.04679	1.69779	18	24.8343	55.9509	0
85	1.56458	0.687003	2.12266	0.467335	1.41562	0.822186	1.62345	3.41614	2.66881	1.96003	1.09541	1.68	1.4573	18	31.8141	56.0827	0
86	5.53731	1.4336	0.882457	1.83723	3.21567	2.59713	3.5832	4.61659	2.7353	2.22385	3.19453	2.50951	4.20686	9	1.4761	47.5608	0
87	4.72524	1.36779	0.777068	1.14767	2.83855	2.22627	2.94692	4.40017	2.43343	1.98018	2.82289	1.85934	3.4417	25	-39.0472	33.918	0
88	4.59897	2.32749	0.826649	1.3813	3.97922	2.05423	3.8898	4.54892	3.08961	2.33947	3.26744	2.52811	3.37626	3	7.1972	-5.86526	0
89	5.00614	1.66564	0.87068	1.56879	3.25943	2.27237	3.28949	4.78157	2.49692	1.94267	2.37493	2.03264	3.62665	11	-15.5041	38.8623	0
90	1.30672	0.922941	1.8941	0.467335	1.86786	1.27173	2.72324	5.99585	3.31513	2.20304	1.32242	2.26625	1.86605	13	10.6846	63.5025	0
91	5.15484	2.42356	0.806189	1.64393	3.9374	2.39527	3.72087	4.78233	2.78754	2.28729	2.83073	2.35639	3.70528	23	7.78462	21.4978	0
92	2.80228	2.67855	1.8076	0.95084	4.30917	3.38747	3.77505	1.83549	2.86084	4.38532	5.31266	3.07849	2.6749	24	36.2827	-51.5121	0
93	4.96363	1.64264	1.29737	2.1305	3.19864	1.92985	3.46121	4.78858	2.56347	1.98325	2.45911	2.37288	3.61898	28	-14.6505	33.7305	0
94	4.372	2.64709	1.33065	1.79551	4.27767	2.74087	3.89719	4.78735	2.97751	3.51484	3.68606	2.48233	3.15387	27	4.37632	-34.7889	0
95	4.60256	1.15415	0.580963	1.31993	2.53977	1.94107	2.34379	4.42436	1.90544	2.41956	3.54485	1.51447	3.38379	25	-44.4596	38.0144	0
96	4.53936	2.54811	0.654904	1.1044	4.15402	2.07545	3.80726	4.08435	2.97976	2.2689	2.98424	2.13564	3.28662	20	-15.9747	-10.7531	0
98	3.96074	2.28957	0.995021	1.38874	3.86945	1.52441	3.89442	5.09938	2.85831	2.33622	3.50212	2.51664	2.88885	3	-2.38464	-17.2659	0
99	2.73514	0.355153	1.31413	1.66145	1.40348	2.02082	3.18183	4.45327	2.76974	2.95283	3.06261	2.79969	2.44015	29	72.1104	-20.3649	0
100	4.88901	1.40249	0.878542	1.45827	3.14123	2.05851	3.14305	4.49055	2.36673	2.10581	3.05847	1.94804	3.56695	11	-21.7349	43.4468	0
101	4.87753	3.15518	1.23376	1.4926	4.80579	2.2689	4.49004	5.09654	3.47921	2.63179	2.43246	2.71143	3.63661	5	18.3963	-17.6703	0
102	4.90654	1.7415	1.04793	1.56668	3.45715	2.29636	3.69108	4.5028	2.8974	2.30982	3.06981	2.55837	3.52061	28	-2.00502	32.0748	0
103	3.69672	1.83196	0.39881	1.00293	3.47164	1.70624	3.62299	4.49638	2.46099	2.1601	2.9077	2.10819	2.79093	2	-49.4337	-8.0737	0
104	2.47762	1.31226	2.0496	0.141725	1.11067	3.6383	1.31793	2.32859	3.01827	3.96261	4.31824	2.74029	3.13001	14	-26.0921	-57.8906	0
105	4.11043	2.66843	1.43258	1.14463	4.17026	2.14057	3.99629	4.5698	3.30585	2.48259	3.18452	2.53685	3.13387	3	-0.657509	-23.4745	0
106	2.73922	1.47131	1.48625	0.335977	1.06283	3.91089	1.56147	1.22669	1.72298	4.46089	3.04174	3.14772	2.95132	17	-19.834	-80.1651	0
107	4.94289	1.78122	1.29173	1.81574	3.40122	2.08798	3.5522	4.84247	2.98814	2.12467	2.44015	2.412	3.64097	28	-3.99675	25.9357	0
108	4.8032	0.953706	1.10865	2.0144	2.53231	2.21411	2.88576	4.32734	2.12657	2.21899	3.67714	1.94184	3.55375	11	-20.112	56.4879	0
109	0.674484	0.640885	1.65785	0.87438	0.564647	1.14436	1.05961	1.81412	0.984178	2.10036	0.552464	1.45974	1.25438	30	-41.7868	66.4119	0
110	4.60256	1.56602	0.755923	1.05631	3.28653	2.05994	3.58947	4.51887	2.57191	1.99391	2.9645	2.48141	3.42852	28	-23.2638	23.2792	0
111	1.22417	0.631513	2.14335	0.578178	0.47207	1.51256	1.19254	1.93948	1.46945	2.30647	0.57151	1.74196	1.5191	30	-47.369	60.3741	0
112	4.97038	2.05566	0.604392	1.44893	3.37456	2.11393	3.57973	4.19219	2.60661	1.99391	3.06364	2.23161	3.69791	28	-11.2451	20.5956	0
113	4.78039	2.10581	0.743098	1.38626	3.69332	2.16396	3.79664	4.56757	2.94379	2.59797	3.54357	2.57945	3.51963	16	-3.37188	7.67888	0
114	4.81352	2.27699	1.11849	1.76091	4.00507	2.126	3.72169	4.53346	2.815	2.34271	3.16372	2.29976	3.57813	16	10.828	16.0155	0
115	2.06162	0.449388	1.72106	0.315982	0.295865	3.34887	1.29217	1.16063	2.08813	4.4249	4.3656	3.07237	2.76558	12	-40.2763	-51.0449	0
116	3.47848	2.37248	0.474464	1.01311	3.99252	1.6615	3.96712	4.56285	3.14487	2.51588	3.38304	2.65883	2.52195	20	-19.7027	-31.4258	0
117	2.77452	2.81118	1.56439	2.3595	4.60256	3.13963	4.05159	2.27814	3.00632	4.18773	4.64516	2.96678	2.46847	8	20.04	-51.8152	0
118	4.28422	1.20195	0.814407	1.16276	2.76333	1.96003	3.5522	4.33331	2.94959	2.30087	3.19589	2.58941	3.38116	6	-46.3439	16.9563	0
119	3.48107	2.41254	1.47908	1.10754	4.15749	2.24306	3.77297	5.22859	2.64798	3.12333	3.31312	2.25368	2.54206	20	-29.6894	-29.5184	0
120	5.3817	1.78862	0.846829	1.76443	3.56043	2.59377	3.81553	4.54544	3.10854	2.31759	3.04121	2.75582	4.0165	23	9.90759	33.6912	0
121	1.11067	0.101824	0.965908	0.896658	0.793577	1.61481	2.98648	4.08626	2.44873	2.49659	1.96491	2.45157	1.98897	7	58.0851	-4.22802	0
122	0.699854	0.926825	2.00666	1.14158	0.495595	1.51256	0.976328	2.47976	1.08202	2.41153	1.00934	1.56217	1.2889	30	-39.0237	57.7288	0
123	4.72262	1.63628	1.05825	1.40104	3.35272	2.04418	3.72443	5.26117	2.96791	2.28729	2.41495	2.68171	3.60464	28	-9.37996	25.1634	0
124	4.79809	2.10581	0.764416	1.20114	3.68384	2.07965	3.67571	4.33122	2.93913	2.25017	2.8242	2.43053	3.40457	16	-11.3656	11.3361	0
125	0.785647	1.34866	2.12004	1.26892	0.457837	1.48849	0.899407	3.16335	1.8005	2.26774	0.9769	1.73061	1.70366	30	-40.1472	51.4814	0
126	1.68247	0.668704	2.32793	0.280699	1.34075	0.855207	1.38661	3.07018	2.93328	1.35416	1.14755	1.34424	0.909562	18	32.7632	55.983	0
127	5.17554	1.7775	1.0022	2.06162	3.25416	2.41656	3.32472	4.87154	2.88577	2.15493	2.94263	2.11611	3.86809	9	0.47946	50.7928	0
128	4.9643	3.60714	1.86438	1.75031	5.19861	2.91313	4.90182	5.32633	4.00325	3.44328	4.12964	3.07595	3.81954	5	26.5599	-22.1967	0
129	5.28512	1.95532	1.31413	1.75563	3.72122	2.61708	3.72142	4.48226	2.72668	2.32968	2.69296	2.41593	3.9113	23	13.6845	29.794	0
130	5.48434	1.45387	1.02351	1.98641	2.95116	2.61543	2.91864	4.50918	1.8627	2.16139	2.89923	1.9356	4.09726	11	-18.6934	53.7989	0
131	2.16089	0.788412	2.53685	1.1747	1.4926	3.14889	2.18934	3.67111	2.88762	4.16177	1.18216	3.03007	2.82224	19	-90.2131	-2.55044	0
132	4.79147	1.00956	0.734489	1.24955	2.77452	2.07265	3.31161	4.79778	2.56347	1.66977	2.51752	2.36157	3.5124	25	-30.849	39.3047	0
133	3.70711	2.18683	1.59285	1.95911	3.7501	3.70595	3.32105	5.25242	2.41985	4.75977	5.33633	3.3572	3.13771	27	7.60238	-42.0855	0
134	1.98499	0.32302	1.29455	0.146937	0.609379	3.27974	1.26286	4.07381	1.29455	4.23756	3.48769	2.86462	2.83268	12	-57.204	-36.0966	0
135	3.0232	1.63628	1.80228	0.0999004	0.929423	4.19681	1.11115	0.867399	1.31413	4.69334	5.18997	3.27582	3.45191	14	-30.4835	-75.0292	0
136	3.80032	2.30535	3.24745	2.80672	3.90506	3.29118	3.70148	5.14888	3.58857	4.22703	4.31942	3.38679	3.41988	27	18.1144	-37.6411	0
137	4.65612	1.91198	0.886362	1.58548	3.44815	1.96471	3.41539	4.38136	2.45441	1.84427	2.35326	1.88429	3.45226	25	-30.462	23.4009	0
138	3.6359	2.56731	1.91824	2.52228	4.01633	3.0495	4.39515	4.36131	3.80734	4.09233	4.79597	4.02996	3.51042	27	15.7151	-38.9167	0
139	2.71173	1.59069	1.3683	0.16255	1.1507	3.84406	1.20195	2.47882	2.49511	3.96862	3.94419	2.57861	3.01286	14	-22.6189	-58.512	0
140	5.34433	1.91198	1.44005	2.29539	3.4933	2.36617	3.50774	4.48558	2.53598	2.19434	3.0215	2.43823	4.11872	9	4.65402	52.4681	0
141	4.88719	2.00596	0.969582	1.29336	3.5983	2.126	3.68599	4.40198	2.97131	2.12333	2.99091	2.44397	3.6243	16	-3.13523	16.1878	0
142	4.73943	2.01639	1.05138	1.17173	3.58641	1.93468	3.61905	4.09968	2.78482	2.25017	3.16045	2.63858	3.43317	16	-10.6599	8.37719	0
143	5.5884	1.7122	1.08202	2.0928	3.42445	2.68087	3.60221	4.31847	2.89252	2.02377	2.41887	2.59927	4.24913	9	15.9282	46.5521	0
144	0.0736667	0.49518	1.61	0.699854	0.250182	1.39193	0.520217	1.36236	1.17594	2.36089	0.469494	1.48148	1.28606	30	-35.8582	69.2115	0
145	2.31515	0.485084	1.81113	0.724841	0.809313	3.45013	1.95846	3.13963	1.90221	4.46455	4.24072	3.12663	2.85957	12	-43.2729	-39.3045	0
146	0.933016	0.740717	1.33882	1.23834	0.851746	1.6213	3.04466	4.68709	2.59271	2.39322	1.92459	2.49782	2.00812	7	52.2803	-3.43579	0
147	4.87865	1.96938	0.894138	1.23552	3.57969	2.21655	3.50332	4.66887	2.88022	2.0935	3.05795	2.31068	3.61482	16	-1.895	16.706	0
148	5.18	1.93307	1.09873	1.91144	3.50412	2.37248	3.52756	5.14947	2.80237	2.33404	3.15151	2.3096	3.89972	9	12.3213	42.377	0
149	4.33337	2.33838	-0.0994361	1.38874	3.72046	1.82307	3.69221	4.54904	3.5081	2.04562	2.87587	2.12917	2.99147	3	-12.506	-10.4591	0
150	4.46936	1.42074	0.326185	1.05957	2.94012	1.87017	3.39472	4.23313	2.62909	2.24068	2.73958	2.33962	3.36525	6	-45.3072	18.8442	0
151	1.19239	0.762578	2.26625	0.541888	1.72878	1.25989	1.99239	3.4999	3.20265	2.13925	0.874616	2.00812	1.7606	18	26.5439	58.435	0
152	5.19751	1.22669	1.23079	1.916	2.72968	2.34055	2.98305	4.3444	2.27978	2.03403	3.10854	2.11216	3.92864	11	-17.4025	55.1051	0
153	1.26892	0.593533	1.266	0.355843	1.74675	1.14436	1.6841	3.74792	2.57778	2.05423	0.508942	1.551	1.53744	18	30.1403	53.8657	0
154	1.27712	0.705104	2.86147	0.50959	1.56879	1.12787	1.82129	3.37128	3.1482	1.80689	1.11194	2.12135	2.33856	13	30.2623	63.9582	0
155	5.06177	1.96782	1.21278	1.91296	3.73589	2.26774	3.52021	4.93169	2.71143	1.83901	2.49147	2.0369	3.71986	28	-0.302402	25.0279	0
156	3.96354	1.76627	0.672919	0.85933	3.25254	1.74919	3.21236	4.87397	2.10021	2.37352	3.598	2.02692	2.6802	6	-42.7946	3.10448	0
157	3.54839	1.85644	0.772862	0.954377	3.52572	1.47871	3.69924	4.58136	2.83268	2.15103	3.16745	2.43535	2.43823	2	-43.1225	-16.7065	0
158	4.25446	2.19184	0.89801	1.22986	3.7296	2.03111	3.65073	4.78091	2.79363	2.43446	3.54835	2.39614	3.01557	16	-7.63934	1.81688	0
159	1.64393	0.163603	1.0129	0.172937	0.172937	2.80914	1.26286	3.50638	1.31135	3.99629	3.99249	2.63701	2.18474	12	-53.1066	-42.9599	0
160	5.14261	1.47131	0.980544	1.41803	2.88476	2.41052	3.10778	4.77776	2.28537	2.35023	3.47648	2.39913	3.81809	11	-15.5719	56.4987	0
161	4.81659	2.0149	1.46461	2.28907	3.57616	2.1445	3.58603	4.52956	2.89375	2.11528	3.08961	2.24445	3.54485	9	4.21935	40.4506	0
162	4.27489	2.49566	0.409032	1.00293	4.09757	1.94584	3.86849	4.73709	2.75442	2.37666	2.43053	2.22454	3.2031	10	-21.6508	-7.53013	0
163	4.66409	2.16139	0.708384	1.27166	3.85506	2.11663	3.55964	4.56816	2.68322	2.39322	2.92205	2.22572	3.35024	16	-12.6244	11.9696	0
164	3.9804	0.381666	1.10205	0.929423	0.728968	1.93628	2.20304	4.94984	1.80936	2.48447	3.11002	1.94184	2.72596	21	41.5556	-27.8286	0
165	3.09281	2.27006	1.14116	0.785647	3.71714	2.82198	3.40115	4.79385	2.38609	3.91316	3.75799	2.59435	2.25483	27	3.80615	-46.9926	0
166	4.48255	2.06419	0.995021	1.17767	3.81527	1.93307	3.35758	5.05006	2.41593	2.01639	2.47773	1.73061	3.27457	25	-29.8251	18.0614	0
167	1.30672	1.19254	2.0538	0.409769	1.79891	1.64264	2.01193	4.29727	3.74527	2.62283	0.991417	2.1872	1.68398	13	20.666	58.3046	0
168	4.35226	2.05709	0.489307	1.7215	3.55382	1.89212	3.57973	4.61446	2.69296	2.01787	2.43919	2.42666	3.1482	10	-17.347	4.23293	0
169	4.2877	1.45889	0.552464	0.918588	3.03943	2.11797	3.45836	4.34513	2.91848	2.32749	3.18635	2.52283	3.24659	10	-36.2756	10.6919	0
170	1.06607	0.682446	1.48625	0.528107	0.198821	1.35416	1.04905	2.19059	1.21882	2.14581	0.686307	1.50045	1.38667	30	-35.2057	61.1494	0
171	3.98921	2.09762	1.0129	1.16875	3.77262	1.44378	3.71922	4.27135	2.71726	2.08936	2.74809	2.13821	2.7502	2	-37.5633	-8.77732	0
172	4.70933	2.40445	0.654904	1.56879	4.0222	2.01342	3.99462	4.75929	3.19045	2.15103	2.65883	2.37493	3.5193	22	10.0644	4.77049	0
173	3.59281	1.91198	0.969582	0.674484	3.62977	1.50299	3.96777	4.42734	3.26912	2.24544	2.1872	2.69072	2.78278	2	-32.1772	-20.3806	0
174	0.947294	0.386939	1.05825	0.604953	0.618198	1.72206	2.67623	4.52809	2.00373	2.69393	1.10865	2.35431	1.59285	1	49.0759	15.5684	0
175	2.11308	1.96782	0.890255	0.523493	3.43772	2.78434	2.99557	1.76249	2.0008	3.87133	4.37205	2.55581	2.08813	24	33.8934	-66.4924	0
176	1.13239	0.569396	0.627529	-0.0157993	0.881845	0.540033	1.9054	3.46263	1.3683	1.07703	0.126926	1.27176	1.41241	18	39.4999	42.4982	0
177	5.19447	2.16909	0.826649	1.65564	3.7414	2.37666	3.71619	4.71205	2.86462	2.65979	3.55469	2.37288	3.94333	23	14.6325	36.2703	0
178	4.49238	1.96159	0.874616	1.19239	3.5658	2.04994	3.58414	4.62651	2.74384	2.36512	3.40236	2.31394	3.23752	10	-26.173	14.2307	0
179	4.89004	2.17673	0.403926	1.42284	3.83047	2.25958	3.58665	4.76876	2.65031	2.2689	2.40707	2.10288	3.52746	28	-4.9374	20.9995	0
180	4.7375	2.08104	0.743098	1.23834	3.59483	2.29184	3.57752	4.67438	2.80237	2.28501	3.66504	2.44683	3.4346	16	-3.71482	8.49325	0
181	0.631347	0.942251	1.8199	1.15976	0.325995	1.44884	0.883493	2.36089	1.37094	2.37978	0.738799	1.66394	1.42757	30	-39.7988	57.8111	0
182	0.781666	1.10778	2.72452	1.1747	0.578178	1.22975	1.57054	4.03189	2.33962	2.09625	1.42506	1.68199	1.59069	30	-20.9588	69.3282	0
183	4.51153	2.27122	1.18835	1.83559	3.98843	2.04706	3.98981	4.53698	3.25302	2.43249	3.03007	2.70186	3.40052	22	9.40527	-1.39533	0
184	4.65782	2.2371	0.57151	1.20983	3.95531	2.02377	3.85611	4.56321	3.05483	2.4085	2.93679	2.66345	3.34207	3	-5.08701	-10.1978	0
185	3.62221	2.37666	1.02351	1.30406	3.94701	1.70425	3.71261	4.92472	2.93621	2.31093	2.90408	2.39414	2.57945	20	-27.2846	-20.7313	0
186	1.80399	0.135584	1.23969	0.219435	0.541888	3.10221	1.57954	4.762	1.50981	4.15005	5.0817	2.75582	2.03974	12	-52.8025	-33.2073	0
187	5.13644	1.9021	0.909562	1.75563	3.58408	2.17419	3.59041	4.82252	2.91311	2.2359	2.84813	2.54982	3.95611	23	9.64489	27.8775	0
188	1.08538	0.65948	2.29314	0.245073	1.58548	1.2328	1.55919	3.62631	2.89313	2.44036	1.03403	1.81289	1.74946	18	26.8928	56.615	0
189	3.09947	1.85644	1.30857	0.0946586	1.46753	4.02077	1.6213	2.22748	2.99147	4.13656	4.7079	2.88331	3.30949	14	-26.6639	-54.8291	0
190	2.40389	2.42754	1.58199	0.355843	4.02821	2.71655	3.65337	1.9863	2.8057	3.7823	5.00073	2.61228	2.3096	24	34.9092	-57.5193	0
191	1.98783	0.490138	1.71722	0.443516	0.817119	3.19397	1.92177	4.54892	1.59501	4.35041	5.18142	3.03007	2.54982	12	-50.1791	-31.4663	0
192	4.69547	1.70425	0.998616	1.38378	3.36297	1.82129	3.28823	4.51664	2.39614	2.04994	2.18965	2.11216	3.41043	25	-31.6072	28.6053	0
193	5.7622	2.30982	1.18835	2.1305	4.03196	2.90944	3.69193	4.83331	2.5481	2.37248	2.89801	2.01829	4.28375	9	12.1267	49.0294	0
194	4.76955	1.88036	0.890255	1.3459	3.41169	2.01193	3.55706	4.3815	2.88084	2.42853	3.41988	2.36776	3.59406	16	-5.21915	13.4768	0
195	0.870632	0.365788	2.27191	0.188482	1.17173	0.801166	1.3732	3.15759	2.56347	1.30655	1.05482	1.50748	1.27464	18	34.4383	56.203	0
196	4.33309	1.89878	0.781262	1.11692	3.52386	1.72402	3.60375	4.40683	2.63227	2.24187	2.51397	2.30085	3.06002	10	-30.8224	3.62228	0
197	2.52228	1.49092	1.2631	0.203982	1.54756	3.69644	1.38126	1.18623	2.9898	4.02158	1.45485	2.64172	2.86838	26	-11.1319	-64.9642	0
198	3.84498	3.06333	0.818499	1.39859	4.76426	2.41153	4.28953	5.03499	3.19634	3.23488	4.17641	2.45062	2.45535	27	4.61	-34.3571	0
199	1.25234	0.32302	1.71529	1.00633	1.06607	2.1445	2.81862	3.44001	2.49147	3.02289	1.07189	2.69072	2.36157	4	67.7698	7.09536	0
200	5.38629	1.92663	1.36565	2.3771	3.6089	2.53391	3.6662	5.01781	3.01611	2.42654	3.27038	2.62512	4.05979	23	22.145	37.8817	0
201	1.61812	0.485084	0.890255	0.0894141	0.355843	2.88007	1.18939	3.36894	1.36565	3.9291	4.15338	2.47032	2.26056	12	-52.9419	-43.0112	0
202	4.03475	2.03694	0.36791	0.87438	3.4775	1.76249	3.31696	4.09517	2.53946	2.31427	2.43343	1.93716	2.6749	6	-49.2767	-3.42051	0
203	3.96354	2.60882	1.47908	2.49589	4.36359	2.90821	3.97353	4.92299	2.93328	3.99441	4.13159	2.78414	2.87151	27	7.48423	-37.5795	0
204	2.76729	2.57506	1.80583	2.50105	4.22333	3.26213	3.73178	2.58785	2.72524	4.32013	5.07322	2.93328	2.83592	8	16.9186	-52.5715	0
205	3.11124	2.92835	1.18216	1.16276	4.6359	2.98648	4.21789	3.54012	3.40604	4.11497	4.05213	2.89252	2.5481	24	22.379	-46.6547	0
206	2.19736	1.97093	1.25145	0.528107	3.78657	2.67234	3.21418	1.55232	2.22572	3.82249	4.07269	2.49238	2.25138	8	24.9557	-70.7743	0
207	1.29336	0.525188	0.951109	0.724841	1.01311	2.03984	3.01072	3.63949	2.46753	2.99782	0.846829	2.66345	2.40112	4	65.3	9.67791	0
208	4.71642	1.51256	0.866732	1.37631	3.13759	2.14188	3.31531	4.57682	2.42375	2.2335	2.94147	2.03406	3.55184	11	-22.7063	38.6616	0
209	4.53451	2.29862	0.913391	1.07577	3.86945	2.178	3.56989	4.23231	2.73172	2.50766	3.15151	2.06904	3.29198	3	-11.3261	-3.14986	0
210	5.39804	2.34594	1.29737	2.10805	4.05558	2.43544	3.90177	4.94767	3.08103	2.23949	2.69816	2.50053	4.08151	23	22.749	28.5518	0
211	3.07014	1.97556	2.26511	0.126066	1.63011	4.06354	1.6256	2.51132	3.46202	4.06898	4.44426	2.8385	3.1208	14	-27.5484	-53.305	0
212	1.07577	0.439088	1.39445	1.58341	1.18653	1.51018	2.66608	3.58446	2.36054	2.37978	1.19143	2.46753	1.59069	4	60.524	11.3479	0
213	1.47442	0.355153	1.13472	1.03323	1.03987	1.93948	2.41354	2.74957	1.9356	2.83467	0.797925	2.33856	2.60661	15	68.846	23.3117	0
214	4.94679	0.163603	1.93716	1.19823	0.345926	2.66451	-0.113092	2.15233	0.469494	3.2823	0.850831	1.8199	3.68661	30	-55.142	60.2595	0
215	1.27984	0.454521	1.81464	2.06689	1.27712	1.75871	3.02124	4.31105	2.73601	2.79681	3.08002	2.59271	1.96947	21	59.9763	-19.3235	0
216	4.57808	2.01044	0.513824	1.59988	3.64501	1.91034	3.55899	4.45945	2.79969	2.07405	2.07726	2.19818	3.20444	10	-18.9332	3.63735	0
217	2.87652	2.59629	1.31413	1.33039	4.24651	2.82935	3.79537	2.56818	2.65031	3.90771	4.42032	2.8037	2.62112	8	25.4159	-54.1395	0
218	5.65184	2.13132	0.947384	1.92054	3.98433	2.85568	3.94127	4.7358	3.02794	2.2907	3.26406	2.45629	4.32631	23	25.311	33.8323	0
219	4.69364	1.83372	0.91721	1.34075	3.50063	2.05851	3.31819	4.26261	2.34909	2.07965	3.05639	2.12396	3.39831	10	-25.0408	18.1848	0
220	2.62751	2.65979	1.99194	0.757564	4.17691	3.16335	3.79892	1.32358	2.99534	4.28064	5.9525	3.04279	2.60091	24	39.2981	-50.32	0
221	4.93147	1.94743	0.984178	1.67868	3.64198	2.25606	3.78564	4.52158	2.85069	2.26774	3.41734	2.51664	3.6172	23	10.7206	18.4054	0
222	4.6416	2.53212	1.12501	1.39613	4.28582	1.99995	4.04665	4.62718	3.17348	2.34163	3.10804	2.47218	3.37324	3	9.15886	-10.6181	0
223	1.5561	0.691546	2.11479	0.840295	1.04317	2.63745	1.51256	3.47041	2.41299	3.79638	0.969582	2.47681	2.64251	19	-90.9404	9.12722	0
224	3.29046	3.11131	1.85089	2.30688	4.7506	3.28145	4.247	4.03048	3.13146	4.44425	4.76966	3.17024	2.83203	27	16.2238	-43.388	0
225	1.17767	0.274217	1.85428	0.961423	0.609379	2.10717	2.47029	2.26774	2.18351	2.91741	1.24559	2.47218	2.33113	15	72.0347	27.5305	0
226	1.36373	1.19254	1.7606	0.476795	1.75208	1.66357	2.38497	4.32839	3.55406	2.69621	0.528399	2.25598	1.63315	13	20.3718	57.9808	0
227	5.27789	1.56147	1.18526	1.68437	3.21271	2.35237	3.23354	4.58379	2.44683	2.06702	2.47403	2.1459	3.97124	11	-9.23075	47.9893	0
228	3.93904	1.70823	0.383404	0.911316	3.33189	1.7122	3.47392	4.51973	2.45157	2.25606	3.06622	2.30633	2.84301	2	-48.8921	-7.91707	0
229	3.07452	3.22007	1.25438	1.1044	4.80061	3.24243	4.40931	2.54103	3.22574	4.28424	4.14851	3.02794	2.97526	24	28.0104	-46.7371	0
230	2.73173	1.65525	1.17594	0.0684133	0.855543	3.84576	1.17029	0.949898	1.66394	4.08206	4.74572	2.52899	3.03539	17	-29.661	-78.3917	0
231	4.68201	1.6213	0.604392	1.1747	3.31292	2.06561	3.26645	4.60872	2.53424	2.15103	2.76002	2.10021	3.40897	25	-24.7157	25.1127	0
232	4.04605	2.16267	1.11849	1.56668	3.72046	2.06702	3.78255	5.10826	3.03804	2.46265	3.60253	2.61952	2.91251	16	-5.04692	4.68535	0
233	4.64737	1.99542	1.10535	1.21845	3.48204	2.29523	3.29789	4.75324	2.34699	2.18683	2.53162	2.08678	3.46167	25	-27.3621	19.8733	0
234	0.881845	0.883493	1.73819	1.05631	0.360788	1.41296	1.20195	2.20551	1.36034	2.59124	0.755923	1.60787	1.91506	30	-42.6745	58.8704	0
235	1.36373	0.544957	1.52601	0.631347	1.02321	2.40038	2.78504	4.71245	2.48965	2.96223	2.07179	2.40608	2.05659	7	51.5832	-1.55162	0
236	4.69566	1.7606	0.743098	1.39859	3.35161	1.99693	3.55155	4.16124	2.83656	2.10581	3.30463	2.32686	3.50379	28	-19.4588	26.2839	0
237	5.50777	1.41035	0.984178	1.78353	2.97611	2.5699	2.95754	4.66129	1.96491	2.08104	2.93738	1.63731	4.1275	11	-18.9373	53.5143	0
238	3.88838	2.7632	0.834754	1.12931	4.55874	1.81051	4.15166	4.41659	3.18315	2.59713	3.029	2.28537	2.39012	20	-11.6163	-28.8372	0
239	5.08355	1.00956	1.30298	1.67297	2.60377	1.94584	2.26425	4.4678	1.73251	1.96159	2.60904	1.47187	3.63923	25	-42.7463	38.2224	0
240	4.69615	1.70425	0.921018	1.12622	3.38887	2.1601	3.49338	4.42028	2.70629	2.07965	2.90226	2.30742	3.41516	28	-22.8518	19.0313	0
241	2.5002	0.938411	1.2631	0.270554	0.741287	3.67628	1.20195	1.14108	1.33338	4.52257	2.52371	3.047	2.77936	17	-18.724	-84.7735	0
242	4.83039	1.95217	0.928603	1.56246	3.66056	2.0485	3.89925	4.58956	2.87089	2.22142	3.02204	2.61791	3.49039	16	-1.8229	15.1281	0
243	3.7963	2.93858	1.4573	1.85668	4.49462	2.11393	4.03068	5.0344	2.95879	2.56124	3.87178	2.18843	2.51219	27	1.36555	-28.2548	0
244	2.12058	1.85989	1.24852	1.48127	3.51357	2.92351	3.0858	2.71282	2.17734	3.92486	4.52548	2.73958	2.12657	8	13.8144	-62.9438	0
245	3.93081	1.82129	1.07528	0.947294	3.37888	1.67183	3.24772	4.25877	2.29535	2.16524	2.85704	2.16488	2.81895	6	-52.559	0.209869	0
246	4.02728	2.37038	1.10535	0.769662	3.94273	1.81591	3.69165	4.0874	2.89007	2.53391	3.41516	2.35326	2.8968	20	-20.4803	-18.7665	0
247	3.96094	2.90388	1.47908	2.07081	4.59727	3.35639	4.16652	5.6314	3.39683	4.37738	4.71952	3.1208	3.17856	27	12.1384	-39.454	0
248	4.53315	1.56602	0.834754	1.29604	3.10041	2.05994	3.27505	4.0813	2.5861	2.25017	2.87276	2.22335	3.24314	6	-44.2126	16.5987	0
249	2.6418	1.02045	0.659426	0.27563	0.863108	3.74712	1.34866	0.805394	1.47187	4.41973	0.87068	2.81895	3.13146	17	-10.7119	-90.1931	0
250	1.56668	0.805394	2.43053	0.457837	1.85507	1.50539	2.04562	3.89211	3.04909	2.36089	1.29455	2.07726	1.73251	13	23.107	60.3632	0
251	4.02069	2.92411	0.980544	1.29336	4.57168	2.16653	4.49207	4.44572	3.44735	2.59208	3.09663	2.87338	2.78686	5	12.0267	-24.9741	0
252	1.1507	0.413146	1.41495	0.626975	0.716554	2.02964	2.73723	3.01183	2.19331	2.98933	0.695173	2.41789	1.99786	15	65.5971	21.8037	0
253	2.52312	2.37978	1.37883	1.83395	3.99543	3.20136	3.60499	2.46169	2.70481	4.28205	3.66391	3.0881	2.57861	8	18.5743	-59.3056	0
254	4.64697	2.0149	1.363	1.68437	3.71252	2.1445	3.72906	4.79731	2.84685	2.30871	3.10952	2.38103	3.43709	16	1.92699	11.0336	0
255	3.70063	2.54458	0.721489	1.61208	4.31002	1.91198	3.74712	4.84355	2.64798	2.834	3.19679	2.11216	2.57275	27	-2.74377	-33.6598	0
256	5.12879	0.903357	0.699588	1.43951	2.36049	2.36933	2.57335	4.71794	1.49574	2.21899	2.78005	1.70755	3.69241	25	-42.6658	39.3399	0
257	3.4801	0.235809	1.71914	2.27631	1.27439	1.88205	2.82064	2.88197	2.38811	2.64308	2.83462	2.53511	2.59927	29	78.1751	-17.2461	0
258	4.52474	2.44329	0.793777	1.07898	3.9731	2.15493	3.97502	4.30204	3.18177	2.84981	3.67882	2.60985	3.3022	3	6.51791	-9.36341	0
259	2.35357	1.35141	3.84518	0.940174	2.48723	1.66771	2.86344	3.43492	3.96853	2.15751	1.7698	3.13531	3.43851	13	15.6493	75.6899	0
260	2.42074	0.976328	3.03327	0.914957	2.04968	1.86504	2.50582	3.46227	3.70201	2.58616	1.65377	2.69964	2.70849	13	17.1495	68.716	0
261	4.93701	1.29794	0.947384	1.36373	3.14531	1.84602	3.21008	4.3382	2.24907	1.66771	2.56177	2.06491	3.45993	25	-34.3091	32.0796	0
262	5.18278	2.08521	1.10205	1.46059	3.54535	2.35451	3.63681	4.78499	2.77799	2.19309	3.34402	2.35118	3.79024	23	11.2123	37.27	0
263	4.50933	2.61708	0.672919	1.27439	4.19643	2.24662	3.90611	4.81087	2.89375	2.46552	3.48363	2.39813	3.23709	3	5.19577	-13.7419	0
264	4.44023	1.76627	0.686307	1.26342	3.59483	1.97556	3.25909	3.95699	2.2876	2.03403	2.87089	1.78255	3.18223	25	-30.8955	20.8549	0
265	2.94289	1.37589	1.05138	0.057901	1.19532	4.0684	1.82841	1.23584	1.8199	4.74756	1.96187	3.46652	3.49477	17	-12.9606	-82.4513	0
266	3.09329	0.355153	1.33065	0.978877	0.769662	1.73958	2.40445	5.16358	1.9006	2.57678	2.47311	2.13564	2.51219	21	41.7177	-25.2639	0
267	5.52117	1.72009	1.54198	1.94739	3.37564	2.659	3.66504	4.21186	2.71581	2.17419	2.96393	2.6283	4.08169	9	16.798	44.4468	0
268	4.33199	2.10309	0.818499	1.22986	3.58903	2.07965	3.47357	4.65946	2.73243	2.22748	3.05639	2.14207	3.26575	10	-23.9466	10.2961	0
269	5.24088	1.99239	1.10205	1.90071	3.64364	2.54634	3.60221	4.96205	2.64564	2.27584	3.22793	2.16237	3.81809	9	10.0168	44.5677	0
270	1.42284	0.569396	1.23673	1.93554	1.08857	1.62774	2.90574	3.94829	2.5481	2.76675	3.08558	2.66114	2.22572	29	64.6799	-12.7463	0
271	4.82288	1.95059	0.566766	1.15976	3.64501	2.55513	3.63949	4.63623	2.90044	2.37143	2.86021	2.55153	3.97665	23	6.63294	26.4676	0
272	5.32933	1.63415	1.08202	1.93852	3.22449	2.42256	3.15903	4.93659	2.25138	1.96938	2.82942	2.01829	3.94032	11	-8.17174	54.6345	0
273	2.89701	2.24306	1.81113	2.10299	3.36078	3.34926	4.61872	2.01935	4.36967	4.47389	5.03774	4.6266	3.84376	5	27.5458	-34.0133	0
274	5.55331	1.50539	0.439452	1.8124	3.28417	2.63098	3.638	5.00086	2.9645	2.178	3.15717	2.74809	4.16925	9	1.89133	47.5656	0
275	4.82727	2.31538	1.08538	1.44893	3.91854	2.18431	3.837	5.00041	3.0215	2.22142	2.97131	2.39414	3.57658	16	6.75719	9.67265	0
276	4.1328	2.63826	0.830707	1.5259	4.3547	2.07685	3.87416	4.71459	2.5113	3.05003	3.33067	2.10421	2.95305	27	-1.76792	-34.5016	0
277	2.72282	2.54546	2.02692	2.81493	4.21667	2.91741	3.90543	2.10853	2.54724	4.10287	4.21506	2.93679	2.29314	8	18.405	-55.9507	0
278	3.92729	2.14057	0.87068	0.840295	3.75873	1.71022	3.56253	4.47014	2.68997	2.24662	2.77456	2.051	2.82812	2	-36.357	-10.4837	0
279	4.88576	2.40546	1.18216	1.53678	4.07706	2.13925	3.72251	4.94493	2.81763	2.00745	2.92443	2.03406	3.55785	16	6.04244	10.8466	0
280	5.18844	1.55002	0.969582	1.70865	3.33564	2.38497	3.35046	4.40835	2.57527	2.10581	2.58941	2.33539	3.93709	11	-8.45301	47.1841	0
281	2.11056	1.07009	2.74526	0.687217	1.56458	2.69316	2.22748	3.13226	3.01014	3.67427	1.29737	2.84301	2.54724	19	-94.8248	-2.84963	0
282	4.60045	1.41815	0.378249	1.60803	2.95061	1.87528	3.27718	4.34234	2.30633	1.94426	2.83527	1.98749	3.25983	25	-35.0848	29.0782	0
283	0.50959	0.474942	1.47668	0.940174	0.419458	1.19882	0.731887	1.87528	1.23969	2.41153	0.677393	1.47908	1.27464	30	-35.9159	67.8024	0
284	2.27309	2.35023	1.05482	1.09809	3.97883	2.49937	3.46935	2.75605	2.6711	3.69644	3.80167	2.60254	1.98152	8	24.4791	-65.4871	0
285	4.32337	2.85697	1.16025	1.95327	4.48647	2.52943	3.99148	4.98347	2.91071	3.44219	4.02996	2.53772	3.01827	27	5.75214	-35.0481	0
286	2.79397	2.45495	1.22182	1.76443	4.09687	3.36504	3.61296	2.88197	2.75722	4.43072	4.65479	3.07951	2.66575	8	13.6851	-53.6381	0
287	2.61533	2.42853	1.58852	1.89298	4.12823	3.21554	3.75617	2.76034	2.77043	4.45234	4.59334	3.13914	2.8621	8	14.3079	-52.9263	0
288	1.90685	1.25392	4.00567	0.904007	2.37127	1.89379	3.09966	3.60159	4.14132	2.2335	2.00666	3.28082	3.45785	13	14.7588	76.1898	0
289	5.05809	1.69623	1.87272	1.86468	3.52851	2.30199	3.60499	4.6121	2.74313	2.36512	3.07544	2.50143	3.8402	9	4.09925	39.9393	0
290	4.83173	2.61626	0.797925	1.47213	4.24545	2.21533	3.92821	4.63513	3.10656	2.24781	2.9161	2.07042	3.46098	22	12.7504	-2.03111	0
291	2.0403	1.55462	3.92121	1.00633	2.75602	1.93948	3.19582	4.06471	4.20735	2.63422	1.91665	3.35063	3.49678	13	12.3151	74.7228	0
292	1.39121	0.257802	1.52141	0.433921	0.340955	2.75963	1.41296	2.35023	1.5306	3.96583	4.74312	2.66345	1.79694	12	-49.2762	-46.651	0
293	4.90076	2.322	1.39961	1.97929	4.05485	2.28843	3.88376	5.0102	3.16419	2.44817	3.23839	2.46474	3.62959	22	25.5895	9.44459	0
294	4.44346	3.29957	1.21882	1.53244	5.02279	2.2689	4.62718	5.15171	3.52583	2.75461	3.0734	2.53162	3.04174	5	19.2813	-22.728	0
295	5.19406	1.75871	1.09873	1.83395	3.30175	2.40038	3.22098	5.08103	2.28537	2.09899	2.98647	1.81289	3.8034	11	-13.3854	50.2167	0
296	1.736	0.520217	1.64557	0.0157993	0.591613	2.89204	0.668704	3.34289	1.60146	4.08263	4.67605	2.67262	2.40212	12	-50.2722	-42.2281	0
297	2.39249	2.12467	1.46217	1.3788	3.85951	3.00793	3.35125	2.62446	2.52371	4.09271	4.08579	2.83656	2.23746	8	14.9894	-61.8223	0
298	2.43823	2.52943	1.38667	0.64006	4.14938	2.99387	3.70483	1.74919	2.81566	4.00726	4.55092	2.64407	2.40509	24	33.1463	-58.456	0
299	4.68444	2.04129	1.09541	1.46291	3.79204	2.27814	3.76381	4.61693	2.8242	2.48447	2.86273	2.47588	3.51536	16	6.24134	4.64687	0
300	4.75297	1.8195	1.06849	1.88832	3.23902	2.00446	3.43674	4.50556	2.64876	2.27584	3.10409	2.20423	3.3972	28	-7.04085	29.2432	0
301	5.17732	2.16653	1.09541	2.02675	3.75898	2.26658	3.64837	5.2454	2.82355	2.2371	3.13483	2.29756	3.85459	23	17.1683	30.7893	0
302	5.39182	2.02818	0.901871	1.96636	3.71381	2.47029	3.61692	4.90316	2.81102	2.30311	3.44875	2.34173	3.91019	23	17.258	37.2842	0
303	3.85729	2.01639	0.523552	0.741287	3.60146	1.81591	3.56285	4.78034	2.61147	2.22989	2.95017	2.24907	2.6596	2	-45.1506	-13.034	0
304	4.35254	2.03984	0.802063	1.07577	3.69567	2.09762	3.92463	5.01187	3.11933	2.63584	3.03804	2.79834	3.23709	16	-5.31651	1.47542	0
305	2.01853	1.77564	1.23079	0.947294	3.28732	2.80231	2.83201	0.903357	1.96339	3.98624	4.08113	2.65574	2.30524	8	25.5221	-71.9707	0
306	5.09813	2.62528	0.785445	1.68058	4.24831	2.32968	3.99816	4.87898	3.10161	2.55075	3.38641	2.28982	3.79548	22	20.8771	-1.84644	0
307	5.01149	2.08104	0.434408	1.35612	3.72275	2.25724	3.61265	4.23329	2.78958	2.10445	2.10686	2.12527	3.70962	28	-7.31393	18.9348	0
308	2.42445	2.61378	1.62479	0.560116	4.01993	2.7343	3.63382	1.11786	2.76904	3.91225	5.409	2.64407	2.27754	24	42.2263	-55.9668	0
309	0.9366	1.81771	1.13472	0.375575	1.35358	1.3292	2.90388	4.60442	2.53598	2.25135	0.822579	2.41299	1.78617	1	36.8959	25.7419	0
310	4.23346	1.63841	0.87068	1.49035	3.24969	1.7719	3.47952	4.69903	3.02258	2.10309	2.99423	2.42763	3.15434	6	-42.3143	8.25871	0
311	4.33489	1.63202	0.528399	0.918588	3.11171	1.84077	3.45336	4.3603	2.58444	2.15622	2.82289	2.22454	3.22178	6	-42.5182	12.0535	0
312	4.88065	1.68816	0.721489	1.34846	3.3002	2.26075	3.53253	4.31696	2.7889	2.26774	3.24055	2.54896	3.7598	9	-2.92333	34.6064	0
313	1.64197	0.957503	3.59436	0.635709	2.11808	1.22669	2.61213	3.14986	3.67181	1.93948	1.06849	2.83592	2.92205	13	23.3608	71.8483	0
314	1.41803	0.433921	1.51447	1.00973	1.23552	2.12867	3.17901	3.72087	2.81169	3.00793	2.68096	2.887	2.4218	29	64.8442	-15.1093	0
315	2.93175	0.158008	1.5465	2.29329	1.36373	1.68207	2.97038	4.13002	2.42472	2.69621	3.06106	2.46474	2.45252	29	72.5576	-19.0001	0
316	3.33302	2.54811	1.95728	0.777675	4.01879	3.34408	3.61113	2.50766	2.60254	4.3894	5.50558	3.1463	2.97188	24	33.3937	-51.3616	0
317	1.16276	0.312235	1.2775	1.23834	1.15675	1.85816	3.03166	4.22106	2.41299	2.48353	2.7209	2.59353	2.0538	7	56.475	-12.4669	0
318	5.04786	2.15103	0.814407	1.44188	3.78058	2.28043	3.78152	4.22835	2.96507	2.4085	3.52159	2.36157	3.74527	16	9.22322	18.1084	0
319	3.93452	2.30199	1.03752	1.00973	4.00507	1.76438	3.72087	5.11475	2.75652	2.34702	2.52018	2.04398	2.7209	20	-29.9249	-21.1251	0
320	4.86428	2.49473	0.87068	1.41562	4.23651	2.37561	4.04029	4.71225	3.26152	2.59377	3.33815	2.52459	3.52518	22	18.2724	-4.72005	0
321	2.66687	1.63841	0.730168	0.203982	1.21845	3.83969	1.27761	1.45136	2.80504	3.93088	4.37526	2.61711	2.7353	14	-25.9175	-60.0358	0
322	1.52809	0.987497	3.33815	0.462591	1.68814	1.33758	2.43741	3.10474	3.56757	1.45889	1.50514	2.53511	2.89923	13	25.8693	71.6026	0
323	4.24997	1.64896	0.905722	1.09493	3.17651	1.71418	3.49028	4.406	2.85578	2.04418	2.58693	2.14078	3.03327	6	-39.449	12.5793	0
324	1.58133	0.49518	1.39961	1.56458	1.29872	1.60828	3.19118	3.2119	2.59681	2.68857	2.70038	2.6802	2.2186	29	69.5038	-11.4491	0
325	4.57124	2.07124	0.681856	1.12622	3.70193	2.01787	3.59881	4.34748	2.81895	2.10581	2.83462	2.38002	3.3026	10	-14.1191	11.6031	0
[truncated: 43,458 more rows]
